# Supplementary material for: Retinal direction selectivity in the absence of asymmetric starburst amacrine cell responses
Source: eLife journal article supplement (doi:10.7554/elife.42392), 2019-02-04
Supplement: supp [file elife-42392-supp-v1.zip]

Archive with 11 entries (11 files):
- elife_poa_e42392_Figure_2_source_data_1.xlsx
- elife_poa_e42392_Figure_3_source_data_1.xlsx
- elife_poa_e42392_Figure_7_source_data_1.xlsx
- elife_poa_e42392_Transparent_Reporting_File.pdf
- elife_poa_e42392_Figure_4_source_data_1.xlsx
- elife_poa_e42392_Figure_6_source_data_1.xlsx
- elife_poa_e42392_Figure_5_figure_supplement_1.png
- elife_poa_e42392_Figure_7_figure_supplement_2.png
- elife_poa_e42392_Figure_4_source_data_2.xlsx
- elife_poa_e42392_Figure_7_figure_supplement_1.png
- elife_poa_e42392_Figure_5_source_data_1.xlsx
