# Supplementary material for: Retinal direction selectivity in the absence of asymmetric starburst amacrine cell responses
Source: eLife journal article supplement (doi:10.7554/elife.42392), 2019-02-04
Supplement: supp [file elife-42392-supp-v1.zip › elife_poa_e42392_Figure_2_source_data_1.xlsx]

## Sheet: -D
		Fig 2A
		time	Wildtype - Pref	Wildtype - Null	Gabra2KO - Pref	Gabra2KO - Null	ChR2 - Pref	ChR2 - Null	Gabra2KO/ChR2 - Pref	Gabra2KO/ChR2 - Null
		0	-3.58708	2.21292	21.2922	12.4447	11.1205	1.97046	42.6964	1.23586
		0.0001	-2.97708	-8.76708	21.3339	8.48471	-0.169541	0.140459	39.0364	-6.39514
		0.0002	0.382916	4.04292	21.3183	10.0047	4.71046	8.38046	41.1764	2.75586
		0.0003	-12.1271	1.30292	21.2463	7.87471	-7.18954	-0.169541	44.5264	-1.81714
		0.0004	3.13292	-5.41708	21.1189	9.39471	-1.99954	4.41046	41.4764	0.92586
		0.0005	-9.98708	1.30292	20.9377	17.6347	-0.169541	2.27046	41.4764	-2.42714
		0.0006	-10.2971	1.30292	20.7046	10.0047	0.140459	-0.469541	33.8464	0.31586
		0.0007	-0.837084	-1.13708	20.422	19.1647	2.58046	-1.08954	34.4564	1.23586
		0.0008	-4.19708	-8.46708	20.0924	6.04471	-1.08954	2.58046	30.7964	6.72586
		0.0009	-7.85708	-1.13708	19.7189	8.78471	0.140459	-0.169541	32.3264	5.20586
		0.001	-9.37708	5.57292	19.3047	12.1447	-1.38954	-7.79954	38.4264	1.84586
		0.0011	-6.32708	-0.837084	18.8533	12.7547	-4.74954	4.71046	33.2364	-0.59414
		0.0012	-2.66708	-6.63708	18.3684	8.17471	-5.65954	2.58046	31.0964	-3.34314
		0.0013	-6.63708	-5.10708	17.854	13.0547	8.07046	5.63046	37.8164	-1.20714
		0.0014	-3.88708	3.13292	17.3139	11.8347	0.750459	-1.38954	33.5464	9.47586
		0.0015	-3.58708	9.54292	16.7524	7.87471	-4.13954	1.05046	27.1364	2.14586
		0.0016	-10.9071	4.35292	16.1738	11.2247	5.02046	3.19046	32.6264	0.0158598
		0.0017	-10.2971	1.60292	15.5824	2.07471	-4.13954	-5.04954	34.1564	-7.00514
		0.0018	-5.41708	2.82292	14.9825	12.1447	-5.35954	-2.91954	36.5964	5.81586
		0.0019	-6.02708	-6.02708	14.3784	14.2847	-6.26954	2.88046	30.4864	-2.42714
		0.002	-4.49708	8.01292	13.7745	8.17471	-1.38954	-8.70954	32.9364	-0.90214
		0.0021	-7.54708	4.96292	13.175	13.6747	7.46046	-1.08954	34.4564	8.25586
		0.0022	-4.19708	7.71292	12.5839	6.65471	4.10046	-2.91954	32.9364	-0.90214
		0.0023	1.60292	2.82292	12.0052	8.17471	6.54046	4.71046	33.8464	-2.42714
		0.0024	-1.74708	-1.74708	11.4429	5.73471	1.97046	-0.469541	31.7064	-1.81714
		0.0025	-6.02708	2.82292	10.9004	10.0047	5.32046	-5.04954	21.3364	-1.51214
		0.0026	2.21292	9.84292	10.3812	7.26471	0.140459	1.05046	30.7964	-8.83614
		0.0027	-9.68708	6.18292	9.88838	9.70471	-3.82954	-2.30954	32.3264	-0.59414
		0.0028	-1.13708	10.4529	9.42487	6.95471	-0.469541	0.140459	28.9664	-0.29414
		0.0029	-7.24708	10.1529	8.99325	9.39471	5.32046	-2.30954	30.1864	-2.42714
		0.003	-6.93708	-0.837084	8.5958	11.5347	0.750459	-1.69954	28.3564	1.23586
		0.0031	-3.27708	1.91292	8.23447	7.87471	0.140459	-1.08954	28.3564	0.0158598
		0.0032	-3.58708	2.52292	7.91081	9.70471	0.440459	0.750459	26.5264	2.14586
		0.0033	-2.66708	5.26292	7.62595	11.8347	1.05046	3.80046	29.2664	1.84586
		0.0034	-9.98708	9.54292	7.3806	5.73471	-2.91954	3.80046	33.5464	-2.12214
		0.0035	-3.27708	4.96292	7.175	6.04471	4.41046	-3.82954	36.5964	-2.42714
		0.0036	-1.13708	0.382916	7.00896	10.9247	3.49046	-5.35954	43.6164	-0.29414
		0.0037	-1.74708	0.692916	6.88181	15.5047	1.05046	-0.779541	51.5464	-3.95314
		0.0038	-6.02708	-1.13708	6.79248	-0.0652894	-4.43954	-1.99954	49.1064	-2.42714
		0.0039	-9.68708	7.10292	6.73947	7.26471	-0.469541	1.97046	52.7664	-7.31014
		0.004	-8.46708	5.26292	6.72087	8.78471	1.36046	1.05046	61.9264	0.62586
		0.0041	4.65292	17.4729	6.7344	4.51471	0.140459	1.66046	70.7764	-3.64814
		0.0042	-15.7871	6.18292	6.77744	7.26471	-6.26954	5.32046	71.9964	0.31586
		0.0043	-9.68708	2.82292	6.84706	6.65471	-1.99954	0.440459	63.4464	0.0158598
		0.0044	-9.07708	7.71292	6.94009	4.20471	-4.43954	1.66046	77.4864	-3.64814
		0.0045	-8.15708	15.3429	7.0531	10.6147	-0.169541	-2.30954	70.4664	-3.64814
		0.0046	-14.5671	6.49292	7.1825	17.0247	-2.30954	-2.60954	82.0664	6.11586
		0.0047	-12.7371	8.62292	7.32454	7.56471	0.750459	-0.169541	80.8464	4.89586
		0.0048	-7.85708	9.23292	7.47542	9.09471	7.46046	-0.469541	87.8664	3.67586
		0.0049	-7.24708	13.5029	7.63127	17.9447	9.90046	-2.30954	87.8664	-6.39514
		0.005	-3.88708	14.4229	7.78821	8.78471	4.41046	-2.91954	84.8164	-3.03814
		0.0051	-11.2171	10.1529	7.94241	2.98471	5.02046	2.27046	92.7464	3.98586
		0.0052	-15.4871	10.7629	8.09012	8.78471	1.97046	-3.21954	88.7764	-0.29414
		0.0053	-6.02708	15.0329	8.22775	-8.60529	2.58046	-2.30954	79.0164	1.23586
		0.0054	-4.80708	11.6729	8.35184	9.70471	-11.1595	0.750459	83.5864	-10.0571
		0.0055	-6.63708	17.1729	8.45919	11.8347	-1.08954	-5.65954	87.2564	-0.90214
		0.0056	-6.02708	19.9129	8.54688	6.04471	4.10046	-0.169541	82.0664	3.06586
		0.0057	-2.97708	3.13292	8.61225	-0.675289	-0.779541	2.58046	87.8664	-2.12214
		0.0058	-8.76708	16.8629	8.65301	5.12471	2.58046	1.97046	89.0864	0.0158598
		0.0059	-8.15708	11.9829	8.66721	8.78471	-2.60954	-8.70954	83.5864	2.14586
		0.006	-5.41708	14.7229	8.65328	5.73471	-0.469541	2.58046	91.2164	3.06586
		0.0061	-3.27708	19.6129	8.61003	11.8347	0.750459	2.27046	86.6464	-3.03814
		0.0062	-9.37708	13.5029	8.53667	6.04471	-3.21954	-3.52954	81.1464	4.59586
		0.0063	-7.85708	11.0629	8.43284	-0.0652894	10.2105	-5.04954	80.2364	-1.81714
		0.0064	-2.36708	6.79292	8.29857	3.29471	-2.30954	-0.169541	84.8164	-1.81714
		0.0065	-7.54708	11.0629	8.13435	16.7247	-5.04954	2.58046	84.8164	-7.92114
		0.0066	-3.88708	14.1129	7.94103	6.65471	-5.96954	8.38046	85.7264	-9.75214
		0.0067	-3.88708	11.9829	7.7199	1.15471	-0.779541	-4.13954	90.3064	0.0158598
		0.0068	-1.44708	18.6929	7.47258	0.854711	5.32046	0.140459	89.9964	1.53586
		0.0069	3.74292	22.9629	7.20109	6.34471	2.27046	-9.62954	87.8664	-0.29414
		0.007	-5.10708	15.0329	6.90777	12.7547	-0.779541	1.05046	91.5264	-4.25814
		0.0071	-6.02708	14.7229	6.59528	1.15471	2.58046	6.24046	95.4964	-7.92114
		0.0072	1.60292	17.4729	6.26656	4.51471	-0.169541	3.49046	87.8664	1.84586
		0.0073	-3.27708	17.1729	5.92473	6.65471	0.140459	3.19046	84.5064	-6.09014
		0.0074	-0.227084	17.4729	5.5731	3.59471	0.140459	1.97046	85.4264	-3.34314
		0.0075	-0.837084	14.4229	5.21507	6.04471	-5.35954	1.05046	85.7264	3.67586
		0.0076	3.13292	4.35292	4.85415	7.56471	-1.38954	0.750459	85.4264	-4.25814
		0.0077	-6.32708	19.3029	4.49385	12.1447	-2.30954	4.10046	84.8164	-5.47914
		0.0078	-3.58708	25.1029	4.13768	11.5347	-0.779541	-1.69954	91.8264	6.11586
		0.0079	-2.97708	12.5929	3.78914	5.12471	-3.82954	-6.57954	88.4764	-5.17414
		0.008	1.60292	20.5229	3.45163	7.87471	-4.13954	-2.91954	90.9164	3.36586
		0.0081	-0.837084	15.6429	3.12847	10.0047	1.66046	-0.469541	87.8664	1.84586
		0.0082	-6.93708	19.6129	2.82284	1.15471	1.05046	0.750459	84.2064	0.0158598
		0.0083	-4.80708	30.9029	2.53772	12.4447	7.15046	0.140459	85.1164	2.14586
		0.0084	-6.02708	22.6629	2.27585	10.9247	5.63046	-6.26954	78.0964	-2.42714
		0.0085	-1.44708	17.7829	2.03968	3.90471	0.750459	3.80046	77.4864	-1.51214
		0.0086	-5.41708	14.4229	1.83132	11.8347	-1.38954	8.99046	82.0664	-1.51214
		0.0087	-3.88708	29.3729	1.65254	6.65471	-1.08954	3.49046	84.5064	-3.03814
		0.0088	-0.837084	13.5029	1.50479	5.12471	0.440459	1.66046	85.7264	1.23586
		0.0089	-12.1271	11.3729	1.38917	7.56471	1.66046	-3.21954	79.6264	-5.17414
		0.009	-13.9571	17.4729	1.30647	5.12471	3.49046	-1.38954	89.0864	1.23586
		0.0091	-8.15708	17.4729	1.25713	7.26471	-0.469541	-1.99954	85.7264	3.98586
		0.0092	-4.80708	20.8329	1.24133	9.39471	-2.30954	0.140459	79.9264	-1.81714
		0.0093	-2.05708	15.6429	1.25892	-1.58529	1.66046	-1.99954	80.8464	0.62586
		0.0094	-8.76708	24.4929	1.30951	-4.33529	3.80046	5.63046	82.0664	5.81586
		0.0095	-3.27708	11.0629	1.39245	2.07471	1.05046	-8.70954	74.1264	-2.12214
		0.0096	-6.63708	17.1729	1.50692	3.90471	-2.30954	-3.82954	79.6264	4.59586
		0.0097	-5.71708	20.8329	1.65186	2.37471	0.750459	1.66046	72.9064	-5.47914
		0.0098	-14.8771	17.1729	1.8261	4.81471	-1.08954	0.440459	76.2664	-7.61514
		0.0099	5.57292	19.0029	2.02836	13.6747	-0.169541	4.41046	77.4864	-1.81714
		0.01	-2.66708	17.7829	2.25723	-1.58529	5.02046	-4.74954	70.7764	-4.86914
		0.0101	-1.74708	13.5029	2.51123	0.854711	-0.779541	-8.09954	73.8264	0.0158598
		0.0102	0.382916	13.5029	2.78884	6.95471	-5.04954	3.19046	84.2064	1.84586
		0.0103	-8.46708	6.49292	3.08855	4.81471	0.440459	-0.169541	75.6564	-1.20714
		0.0104	-5.71708	10.4529	3.40885	0.544711	-3.21954	5.02046	65.8864	3.67586
		0.0105	-6.02708	12.8929	3.74822	7.87471	2.27046	0.140459	70.4664	3.67586
		0.0106	-0.227084	12.5929	4.10522	2.98471	2.27046	6.54046	71.9964	-3.03814
		0.0107	-9.07708	15.0329	4.47847	2.07471	1.97046	3.49046	81.1464	-9.75214
		0.0108	-3.88708	15.9529	4.86665	2.07471	4.10046	5.32046	73.8264	0.31586
		0.0109	-3.58708	7.71292	5.26858	7.56471	-5.65954	1.97046	73.2164	3.06586
		0.011	-2.66708	21.1329	5.6832	7.56471	2.58046	3.49046	75.6564	1.53586
		0.0111	-6.32708	9.84292	6.10961	-1.89529	-1.08954	-0.169541	71.9964	0.0158598
		0.0112	-6.02708	8.62292	6.54706	0.544711	-4.43954	9.90046	77.4864	-1.20714
		0.0113	-0.837084	0.992916	6.99497	2.98471	4.41046	-8.09954	78.0964	0.92586
		0.0114	-4.49708	9.54292	7.45292	-2.80529	0.140459	0.750459	74.1264	0.92586
		0.0115	-0.227084	12.5929	7.92067	4.20471	0.440459	-5.04954	83.2864	-8.83614
		0.0116	-4.49708	10.1529	8.39814	4.81471	-5.65954	0.140459	83.2864	-5.78414
		0.0117	-7.24708	15.0329	8.88541	11.5347	-0.169541	-4.13954	76.8764	7.64586
		0.0118	-11.8271	11.6729	9.38266	8.78471	8.38046	3.19046	84.5064	1.53586
		0.0119	-8.46708	11.9829	9.89023	-5.86529	2.88046	1.05046	79.3164	-1.81714
		0.012	-6.93708	11.0629	10.4085	4.81471	-1.08954	0.140459	77.4864	1.84586
		0.0121	-10.2971	18.3929	10.9381	6.95471	-1.69954	6.24046	83.2864	-2.42714
		0.0122	-9.37708	20.8329	11.4793	1.76471	0.140459	5.63046	94.8864	-3.34314
		0.0123	-17.0071	10.7629	12.0328	7.87471	-0.469541	0.750459	86.0364	0.31586
		0.0124	-1.44708	9.84292	12.5992	4.51471	-2.91954	5.93046	84.5064	3.67586
		0.0125	-8.15708	4.65292	13.179	10.0047	-6.26954	2.88046	94.8864	-0.90214
		0.0126	-2.36708	3.43292	13.7727	8.17471	-2.30954	-4.43954	86.0364	-0.59414
		0.0127	-6.63708	11.9829	14.3808	2.68471	0.750459	0.440459	77.7964	-4.86914
		0.0128	-7.85708	12.5929	15.0037	7.56471	4.71046	-5.96954	86.3364	3.67586
		0.0129	-8.76708	14.1129	15.6417	6.34471	5.32046	-2.30954	81.1464	-1.20714
		0.013	-1.44708	14.7229	16.2949	8.78471	-2.30954	7.15046	82.0664	2.14586
		0.0131	1.60292	14.4229	16.9633	10.3147	5.02046	-3.82954	89.9964	5.50586
		0.0132	-4.49708	10.4529	17.6468	9.39471	0.750459	-5.04954	83.8964	-0.29414
		0.0133	-4.80708	21.4429	18.3447	14.8947	-0.779541	-3.52954	97.9364	0.31586
		0.0134	-17.9271	15.0329	19.0562	5.12471	3.19046	6.24046	96.4064	7.94586
		0.0135	-6.63708	15.3429	19.7802	10.9247	6.54046	-5.04954	93.0564	-2.42714
		0.0136	-4.49708	14.7229	20.5152	8.17471	-3.52954	-3.82954	91.8264	3.36586
		0.0137	-3.27708	17.1729	21.2595	15.8047	5.02046	1.66046	98.2364	-7.31014
		0.0138	-13.9571	10.1529	22.0108	6.95471	3.19046	-1.08954	93.9664	3.06586
		0.0139	0.992916	4.65292	22.7667	5.43471	5.93046	-3.52954	93.0564	2.75586
		0.014	-6.02708	11.9829	23.5245	10.3147	-9.93954	5.63046	102.516	-4.86914
		0.0141	-7.85708	5.87292	24.2813	3.59471	0.750459	3.80046	104.646	-5.17414
		0.0142	3.43292	8.32292	25.0338	5.43471	1.97046	-5.65954	97.9364	-3.95314
		0.0143	-1.13708	16.8629	25.7786	4.81471	10.8205	3.19046	101.906	-1.81714
		0.0144	0.992916	-2.05708	26.5124	8.17471	5.32046	-1.38954	88.4764	-3.95314
		0.0145	0.692916	10.7629	27.2314	6.04471	7.15046	-5.04954	96.4064	-2.73314
		0.0146	8.93292	-1.13708	27.9319	14.2847	0.750459	2.88046	92.4364	-3.03814
		0.0147	8.01292	9.23292	28.6103	5.12471	0.750459	-3.52954	97.0164	-2.73314
		0.0148	10.1529	8.01292	29.2627	10.0047	-5.65954	-2.91954	96.7164	-0.59414
		0.0149	7.71292	15.3429	29.8855	4.20471	-3.21954	-3.82954	101.286	-8.53114
		0.015	5.57292	7.40292	30.4752	4.51471	-3.52954	0.140459	104.646	0.0158598
		0.0151	5.87292	11.0629	31.0282	6.95471	4.71046	-6.57954	98.5464	-2.12214
		0.0152	14.1129	9.84292	31.5415	15.1947	3.49046	-6.87954	93.3564	2.45586
		0.0153	13.5029	13.8129	32.012	5.43471	0.750459	-3.21954	103.126	-4.56414
		0.0154	15.9529	12.2829	32.4369	14.8947	2.88046	-0.779541	86.6464	-0.59414
		0.0155	16.8629	7.10292	32.8138	6.65471	-2.30954	-0.469541	96.4064	0.31586
		0.0156	16.2529	6.49292	33.1405	5.73471	-8.70954	-3.52954	100.066	-3.95314
		0.0157	13.8129	0.0829157	33.4155	2.98471	1.97046	-7.79954	92.4364	1.23586
		0.0158	21.1329	1.30292	33.6372	4.81471	5.02046	-8.09954	97.9364	-1.81714
		0.0159	13.2029	-2.97708	33.8049	9.39471	-1.38954	-4.13954	96.1064	6.42586
		0.016	21.7429	5.26292	33.918	11.5347	-0.169541	-7.48954	94.5764	0.0158598
		0.0161	10.7629	21.7429	33.9765	5.73471	-7.18954	-8.09954	95.1864	-1.20714
		0.0162	12.8929	10.7629	33.9808	2.98471	-5.65954	1.05046	94.5764	3.06586
		0.0163	12.5929	-5.41708	33.9318	1.15471	-5.35954	3.19046	91.8264	-0.29414
		0.0164	11.6729	2.82292	33.8308	2.37471	-5.65954	-5.04954	90.3064	-3.95314
		0.0165	15.0329	7.71292	33.6796	13.9747	1.66046	-2.30954	79.3164	-1.20714
		0.0166	5.26292	10.4529	33.4804	15.5047	-5.96954	-9.01954	81.4564	-1.20714
		0.0167	9.84292	-0.227084	33.2358	10.9247	-1.38954	-2.30954	97.9364	-0.29414
		0.0168	16.8629	-0.837084	32.9488	3.90471	-2.91954	1.05046	83.5864	-2.42714
		0.0169	16.2529	4.65292	32.6227	13.9747	7.15046	-7.18954	93.6664	-5.47914
		0.017	19.6129	-1.44708	32.2613	-2.50529	4.10046	2.58046	88.4764	4.28586
		0.0171	9.23292	6.49292	31.8684	7.56471	1.05046	4.10046	86.6464	4.59586
		0.0172	11.6729	4.04292	31.4482	2.68471	-3.82954	-1.08954	84.2064	-1.20714
		0.0173	7.71292	3.74292	31.0051	7.26471	5.02046	-1.99954	86.9464	3.98586
		0.0174	5.26292	6.49292	30.5435	9.09471	-3.52954	-4.13954	88.1664	-6.70014
		0.0175	11.9829	8.01292	30.0681	16.7247	-1.38954	-3.52954	89.9964	3.06586
		0.0176	7.71292	7.71292	29.5834	5.73471	-5.65954	-2.91954	88.7764	1.53586
		0.0177	19.6129	8.01292	29.0942	12.4447	1.36046	-1.08954	78.7064	-3.03814
		0.0178	15.6429	0.992916	28.6051	9.39471	4.71046	-6.87954	81.4564	2.45586
		0.0179	13.5029	1.60292	28.1204	10.3147	-6.26954	3.80046	82.3664	-1.20714
		0.018	11.3729	0.992916	27.6446	3.59471	-2.60954	-3.82954	81.1464	3.06586
		0.0181	11.9829	2.82292	27.1817	1.15471	1.36046	-3.82954	77.1864	2.14586
		0.0182	6.79292	7.40292	26.7355	7.26471	7.76046	-6.87954	83.2864	0.62586
		0.0183	11.0629	-4.19708	26.3094	1.46471	4.71046	1.97046	76.8764	0.62586
		0.0184	15.3429	14.1129	25.9063	-2.19529	7.46046	-5.65954	78.0964	-6.39514
		0.0185	11.3729	2.52292	25.529	-1.28529	-8.09954	-3.52954	76.2664	0.62586
		0.0186	9.23292	4.35292	25.1792	3.59471	1.66046	-3.52954	83.8964	-1.51214
		0.0187	11.3729	13.8129	24.8587	0.244711	-4.43954	-3.82954	72.9064	3.06586
		0.0188	6.79292	1.91292	24.5685	4.51471	-7.79954	-13.2895	79.3164	-4.86914
		0.0189	11.6729	-4.49708	24.3091	4.51471	-7.48954	0.750459	81.1464	3.36586
		0.019	15.0329	-0.527084	24.0807	7.26471	-1.38954	-0.469541	78.7064	0.62586
		0.0191	13.8129	6.49292	23.8829	-0.975289	6.54046	-1.38954	73.8264	-3.64814
		0.0192	1.91292	5.57292	23.7152	9.09471	-2.91954	-4.74954	85.1164	-2.42714
		0.0193	4.04292	4.04292	23.5763	0.854711	0.440459	-2.30954	74.7364	-2.73314
		0.0194	5.26292	11.6729	23.4647	2.37471	-1.38954	2.27046	82.0664	1.84586
		0.0195	9.23292	1.30292	23.3786	6.65471	6.85046	-3.82954	84.2064	7.33586
		0.0196	5.87292	1.60292	23.3159	6.65471	-1.08954	-2.30954	78.0964	-4.25814
		0.0197	8.62292	1.30292	23.2741	9.39471	-0.469541	-5.35954	66.1964	-3.95314
		0.0198	3.43292	1.30292	23.2505	1.15471	-1.38954	10.5105	76.5764	0.0158598
		0.0199	6.49292	2.82292	23.2422	9.39471	-6.57954	-3.21954	74.1264	-2.42714
		0.02	11.0629	4.96292	23.2463	11.5347	-3.82954	-1.69954	76.8764	0.62586
		0.0201	5.26292	-1.74708	23.2595	9.09471	-6.26954	-6.87954	71.6864	-4.25814
		0.0202	16.5629	4.04292	23.2788	7.56471	-1.08954	0.750459	68.3364	-4.86914
		0.0203	10.4529	8.01292	23.3007	-1.28529	2.58046	5.63046	73.2164	-3.03814
		0.0204	10.7629	1.30292	23.3222	10.0047	-1.08954	-0.779541	80.8464	-1.51214
		0.0205	7.10292	-6.93708	23.3401	-0.675289	-2.30954	4.10046	72.2964	0.0158598
		0.0206	8.32292	13.5029	23.3514	6.34471	2.88046	-3.82954	84.8164	-1.20714
		0.0207	5.26292	-5.71708	23.3532	8.48471	6.85046	-7.18954	81.7564	-10.0571
		0.0208	6.49292	4.65292	23.343	3.29471	0.140459	-3.52954	91.8264	0.31586
		0.0209	6.79292	-0.227084	23.318	0.244711	3.80046	2.27046	92.7464	-2.73314
		0.021	0.992916	0.692916	23.2762	7.56471	-2.30954	-4.13954	96.7164	-1.81714
		0.0211	10.1529	14.4229	23.2155	2.07471	-3.82954	4.41046	90.3064	-3.03814
		0.0212	0.992916	4.04292	23.1342	10.3147	-3.52954	7.76046	93.3564	4.59586
		0.0213	-3.88708	2.52292	23.0308	-0.0652894	-2.60954	-4.13954	99.1564	-3.34314
		0.0214	5.87292	9.84292	22.9045	16.1147	0.750459	-6.87954	100.986	-9.14114
		0.0215	6.49292	-2.66708	22.7543	4.51471	1.36046	-1.99954	99.1564	6.11586
		0.0216	13.2029	3.74292	22.58	16.1147	2.58046	1.66046	99.1564	4.59586
		0.0217	7.71292	8.01292	22.3815	6.65471	-4.13954	-0.169541	104.346	-10.3621
		0.0218	4.04292	1.91292	22.1589	0.544711	2.88046	-1.08954	103.126	2.45586
		0.0219	2.21292	-5.41708	21.9127	13.3647	8.07046	10.2105	112.276	1.53586
		0.022	-3.58708	8.01292	21.6439	13.9747	0.140459	-1.99954	116.246	-4.86914
		0.0221	11.9829	8.93292	21.3534	-0.675289	2.27046	0.140459	120.216	-5.78414
		0.0222	18.0829	3.43292	21.0425	10.0047	2.58046	-0.469541	110.756	6.11586
		0.0223	8.62292	0.992916	20.7127	9.39471	-0.169541	-1.69954	120.826	-4.86914
		0.0224	7.10292	4.96292	20.3658	8.17471	-5.65954	1.66046	122.656	-2.12214
		0.0225	-0.527084	-0.227084	20.0035	9.39471	-5.96954	3.19046	119.906	-0.29414
		0.0226	10.7629	3.43292	19.6278	12.4447	-3.82954	-6.57954	123.566	-1.20714
		0.0227	4.04292	-0.227084	19.241	11.8347	-4.13954	1.36046	128.456	-6.39514
		0.0228	8.32292	-5.71708	18.845	4.81471	5.93046	2.27046	126.316	4.28586
		0.0229	10.1529	-5.41708	18.4422	14.5847	-1.99954	-8.70954	133.336	-3.34314
		0.023	9.84292	2.21292	18.0348	8.78471	0.750459	2.58046	126.316	1.84586
		0.0231	7.40292	8.62292	17.625	4.81471	5.93046	0.750459	134.246	-3.95314
		0.0232	11.0629	2.82292	17.2149	14.2847	5.93046	-3.21954	138.216	-4.56414
		0.0233	8.01292	4.04292	16.8065	7.87471	1.66046	-1.08954	134.556	-4.25814
		0.0234	6.49292	-0.837084	16.4016	-0.975289	6.54046	-1.08954	137.606	-2.12214
		0.0235	-1.74708	3.43292	16.002	11.5347	1.05046	3.19046	132.726	0.62586
		0.0236	-3.27708	6.18292	15.6088	9.09471	-4.43954	-1.99954	137.916	-11.2771
		0.0237	8.62292	4.35292	15.2234	-0.975289	4.10046	-1.99954	129.066	1.23586
		0.0238	14.1129	0.0829157	14.8465	8.17471	4.10046	-4.43954	135.166	2.14586
		0.0239	-0.227084	6.49292	14.4787	6.34471	1.36046	5.93046	128.756	-9.14114
		0.024	11.9829	-5.71708	14.1204	5.12471	0.140459	2.58046	145.846	-4.56414
		0.0241	0.692916	-0.837084	13.7715	8.78471	1.05046	-2.60954	142.486	-6.39514
		0.0242	11.0629	5.87292	13.4318	11.5347	3.49046	-1.08954	136.996	1.84586
		0.0243	10.7629	8.62292	13.1006	11.2247	1.36046	7.76046	134.556	-13.4141
		0.0244	10.1529	0.382916	12.7771	17.3347	6.85046	-6.87954	139.136	-8.83614
		0.0245	2.52292	6.18292	12.46	7.26471	3.49046	8.38046	133.636	-2.42714
		0.0246	13.8129	0.382916	12.148	5.73471	-5.65954	2.88046	140.356	-3.03814
		0.0247	10.1529	8.01292	11.8396	9.39471	0.440459	5.93046	133.636	-6.39514
		0.0248	6.49292	1.91292	11.5328	17.0247	9.60046	-1.08954	137.306	2.14586
		0.0249	4.96292	-0.227084	11.2257	13.6747	-5.04954	1.66046	135.776	-0.29414
		0.025	8.62292	3.74292	10.9161	1.46471	0.750459	4.41046	142.796	4.28586
		0.0251	8.93292	3.74292	10.6019	9.39471	4.10046	-1.38954	138.216	2.14586
		0.0252	1.30292	1.60292	10.2806	5.73471	2.88046	-7.79954	143.706	0.62586
		0.0253	7.40292	15.3429	9.9501	9.39471	-2.30954	-2.91954	145.236	9.16586
		0.0254	12.2829	7.10292	9.60802	7.26471	2.88046	-3.21954	142.186	-1.20714
		0.0255	8.01292	1.60292	9.25215	8.48471	8.38046	-1.38954	136.696	4.28586
		0.0256	12.5929	3.13292	8.88035	12.7547	6.24046	-9.93954	135.466	3.67586
		0.0257	0.992916	9.54292	8.49062	0.854711	1.66046	6.54046	136.086	-4.56414
		0.0258	9.23292	4.35292	8.08107	19.7747	-5.65954	3.80046	138.216	-0.90214
		0.0259	6.49292	4.35292	7.65	13.3647	4.71046	3.19046	127.226	-3.95314
		0.026	6.18292	0.692916	7.19591	5.43471	3.80046	-8.70954	127.226	-7.31014
		0.0261	8.62292	8.32292	6.71755	9.09471	-5.04954	1.05046	148.596	9.16586
		0.0262	18.0829	0.382916	6.21394	2.07471	-1.08954	-1.38954	136.696	-4.56414
		0.0263	5.57292	1.91292	5.68437	0.244711	5.02046	-3.21954	140.046	1.84586
		0.0264	11.0629	-2.97708	5.12846	3.29471	-1.08954	5.02046	135.776	-1.51214
		0.0265	7.40292	5.57292	4.54612	9.09471	-4.43954	0.750459	138.526	8.55586
		0.0266	12.5929	3.74292	3.93759	5.12471	2.58046	1.36046	133.026	4.59586
		0.0267	0.0829157	5.26292	3.30341	9.70471	10.8205	4.41046	137.306	2.14586
		0.0268	-7.24708	12.2829	2.64446	9.09471	-0.779541	5.02046	135.466	2.75586
		0.0269	0.692916	9.23292	1.96192	6.65471	3.19046	-1.08954	138.216	-4.56414
		0.027	11.0629	4.04292	1.25729	12.4447	-0.779541	4.10046	136.086	-3.34314
		0.0271	0.382916	6.49292	0.532357	2.37471	-1.38954	3.19046	134.556	1.23586
		0.0272	10.4529	0.0829157	-0.21085	3.90471	4.10046	7.76046	130.286	-2.12214
		0.0273	9.23292	15.6429	-0.970042	3.90471	-6.87954	-3.21954	129.976	-0.59414
		0.0274	-1.44708	6.18292	-1.7427	6.04471	9.90046	-5.35954	123.566	5.50586
		0.0275	8.32292	11.9829	-2.52608	6.04471	-0.469541	-0.169541	129.976	0.31586
		0.0276	8.93292	13.2029	-3.31725	21.2947	1.36046	-0.779541	133.946	4.89586
		0.0277	-0.227084	8.93292	-4.11312	3.59471	5.32046	1.97046	128.756	7.33586
		0.0278	7.71292	9.84292	-4.91048	11.8347	2.27046	-2.30954	126.006	0.0158598
		0.0279	5.26292	11.3729	-5.70608	16.4147	1.66046	-1.38954	126.316	1.53586
		0.028	8.01292	13.5029	-6.49664	11.5347	1.66046	2.88046	123.566	-8.22614
		0.0281	-0.227084	13.8129	-7.27891	11.2247	-1.38954	8.68046	125.706	-6.70014
		0.0282	5.57292	14.7229	-8.04966	6.95471	4.10046	0.750459	121.736	-3.03814
		0.0283	2.82292	15.9529	-8.80571	14.8947	5.93046	-2.60954	129.676	-3.03814
		0.0284	6.79292	21.7429	-9.54401	13.0547	-4.13954	-7.48954	125.706	6.42586
		0.0285	-1.74708	20.5229	-10.2616	18.5547	-1.69954	4.71046	125.706	-7.92114
		0.0286	8.93292	24.8029	-10.9558	6.04471	-1.69954	-4.43954	122.046	-0.59414
		0.0287	1.30292	20.5229	-11.6241	4.51471	-1.08954	-1.69954	129.066	-6.70014
		0.0288	0.692916	30.9029	-12.264	17.9447	13.8705	-8.40954	128.456	0.92586
		0.0289	7.71292	29.6829	-12.8735	13.6747	7.76046	-4.74954	126.006	-3.64814
		0.029	-1.13708	14.1129	-13.4506	10.0047	-3.52954	-5.65954	122.346	-3.95314
		0.0291	-0.837084	19.3029	-13.9937	13.9747	1.36046	-3.52954	119.606	-3.34314
		0.0292	3.13292	23.5729	-14.5013	9.39471	9.90046	5.32046	137.306	-6.09014
		0.0293	-1.44708	29.9829	-14.9722	14.2847	-4.74954	-4.74954	140.966	6.72586
		0.0294	0.692916	21.7429	-15.4054	11.2247	1.97046	-2.60954	140.656	-1.81714
		0.0295	3.13292	22.6629	-15.8002	4.81471	-1.08954	4.41046	148.596	0.62586
		0.0296	0.0829157	28.7629	-16.1561	11.2247	-4.13954	4.71046	145.236	1.53586
		0.0297	14.7229	36.0929	-16.4728	11.5347	1.05046	7.15046	144.626	-4.56414
		0.0298	8.32292	25.4129	-16.7505	7.87471	-2.30954	-6.26954	157.446	5.50586
		0.0299	4.65292	25.4129	-16.9893	22.5247	-0.169541	-6.57954	150.426	3.98586
		0.03	3.43292	28.4629	-17.1898	5.73471	-3.82954	0.140459	160.796	-5.17414
		0.0301	-4.80708	40.6629	-17.3528	15.5047	1.97046	-5.04954	168.736	-4.56414
		0.0302	-6.63708	39.4429	-17.4794	10.3147	5.93046	0.750459	168.426	1.84586
		0.0303	-2.36708	33.0429	-17.5708	15.1947	0.440459	1.66046	165.986	-6.39514
		0.0304	-2.05708	36.7029	-17.6285	13.9747	1.66046	2.58046	177.586	-6.70014
		0.0305	-3.88708	29.6829	-17.6542	10.6147	2.58046	-0.779541	185.516	-1.51214
		0.0306	6.49292	38.8329	-17.6498	2.37471	0.140459	-0.469541	185.826	1.53586
		0.0307	-0.527084	35.7829	-17.6173	17.6347	1.36046	3.19046	194.066	-8.53114
		0.0308	0.692916	41.2829	-17.559	11.8347	1.36046	4.10046	194.976	0.31586
		0.0309	2.52292	37.9229	-17.4772	9.39471	1.66046	3.80046	201.386	-1.51214
		0.031	-12.1271	35.7829	-17.3741	12.4447	7.76046	2.27046	210.236	-0.90214
		0.0311	-0.227084	36.0929	-17.2523	7.87471	0.750459	-0.469541	209.326	-0.90214
		0.0312	4.04292	32.4329	-17.1141	10.0047	8.07046	1.97046	217.566	-0.29414
		0.0313	-1.44708	35.1729	-16.962	4.51471	-7.48954	1.05046	223.366	-2.12214
		0.0314	-0.527084	29.9829	-16.7983	16.7247	12.6505	-3.82954	226.716	-3.03814
		0.0315	1.60292	35.1729	-16.6253	5.43471	-0.469541	-1.38954	229.766	0.92586
		0.0316	-1.74708	32.1229	-16.4449	13.6747	-0.169541	-6.87954	227.636	-5.78414
		0.0317	-1.74708	38.8329	-16.2594	4.81471	6.24046	1.05046	239.226	-7.31014
		0.0318	0.382916	31.2029	-16.0704	4.51471	2.58046	-2.60954	236.486	-5.47914
		0.0319	-13.3471	34.8729	-15.8798	5.73471	0.750459	5.02046	235.876	-8.22614
		0.032	6.49292	33.0429	-15.6888	9.39471	-4.13954	-3.52954	236.176	-3.03814
		0.0321	8.01292	37.6129	-15.4987	6.65471	4.71046	0.440459	239.536	-3.95314
		0.0322	4.96292	35.7829	-15.3105	7.56471	3.80046	-5.35954	237.396	-1.81714
		0.0323	4.35292	40.0529	-15.125	6.65471	4.41046	5.63046	236.486	0.0158598
		0.0324	-2.66708	33.0429	-14.9427	15.1947	4.41046	-0.779541	235.876	3.36586
		0.0325	-9.37708	34.2629	-14.7639	6.34471	8.68046	3.19046	246.556	1.23586
		0.0326	-6.63708	32.7329	-14.5886	-0.975289	1.36046	3.19046	251.136	0.92586
		0.0327	0.0829157	32.7329	-14.4167	6.65471	-2.91954	1.66046	248.686	-5.47914
		0.0328	2.82292	26.3229	-14.2478	6.04471	1.97046	-1.99954	248.076	-15.5501
		0.0329	-6.93708	29.6829	-14.0812	2.68471	-0.779541	1.66046	246.556	-2.73314
		0.033	-2.36708	40.6629	-13.9163	0.244711	-1.38954	2.27046	250.826	-8.53114
		0.0331	5.87292	32.7329	-13.752	7.56471	-3.52954	1.05046	250.216	-9.44614
		0.0332	3.74292	44.9429	-13.5871	3.90471	0.140459	1.36046	255.706	-8.83614
		0.0333	-0.227084	37.6129	-13.4204	10.9247	1.97046	2.27046	250.826	-8.83614
		0.0334	0.692916	32.4329	-13.2502	8.48471	-7.79954	6.24046	263.036	-2.42714
		0.0335	6.18292	31.5129	-13.0752	6.34471	-1.38954	-1.08954	253.876	3.06586
		0.0336	0.382916	39.4429	-12.8936	-0.975289	1.36046	-5.65954	247.466	-4.56414
		0.0337	-0.837084	36.3929	-12.704	-1.89529	2.88046	0.140459	267.006	-6.39514
		0.0338	-5.71708	40.6629	-12.5046	0.854711	2.58046	-4.43954	266.086	-1.51214
		0.0339	-8.46708	33.3429	-12.2938	3.90471	4.71046	1.97046	270.966	-2.42714
		0.034	-2.97708	38.8329	-12.07	-0.975289	4.41046	-2.30954	285.616	-3.03814
		0.0341	9.84292	33.0429	-11.832	-5.55529	2.27046	-5.04954	282.566	-6.39514
		0.0342	6.49292	41.5829	-11.5783	-6.16529	-2.60954	-4.74954	290.806	-2.12214
		0.0343	-3.27708	38.2229	-11.3079	-9.82529	10.8205	-2.91954	295.076	-5.17414
		0.0344	-6.32708	33.6529	-11.0199	-7.69529	-5.04954	-2.91954	297.216	-2.42714
		0.0345	6.18292	44.0229	-10.7135	-6.47529	0.140459	-3.52954	310.646	5.81586
		0.0346	1.60292	43.1129	-10.3882	-7.08529	2.58046	-1.38954	315.526	-12.1931
		0.0347	2.21292	39.4429	-10.0436	-1.28529	1.66046	-2.30954	323.456	-3.34314
		0.0348	8.93292	40.3629	-9.67971	-7.69529	0.140459	-3.52954	329.256	-3.64814
		0.0349	0.382916	36.7029	-9.29661	-13.1853	-0.779541	-4.43954	327.736	0.92586
		0.035	-0.227084	46.1629	-8.8947	-3.11529	1.66046	-5.35954	336.276	-0.90214
		0.0351	3.43292	42.1929	-8.47462	-11.9653	9.90046	-0.469541	339.936	-4.25814
		0.0352	1.91292	37.9229	-8.03722	-3.41529	9.90046	6.24046	344.206	-0.59414
		0.0353	-0.227084	40.3629	-7.58361	-1.28529	-10.5495	6.54046	354.586	-0.59414
		0.0354	-1.74708	40.3629	-7.11508	1.76471	-2.30954	3.19046	364.046	-8.83614
		0.0355	-0.527084	52.2629	-6.63314	-5.25529	-7.48954	13.2605	361.296	-2.42714
		0.0356	7.40292	40.9729	-6.13954	-0.0652894	-0.469541	-9.93954	361.296	-8.53114
		0.0357	2.21292	49.8229	-5.63621	-1.89529	-0.469541	-3.21954	364.046	-6.39514
		0.0358	4.04292	43.7229	-5.12531	6.95471	1.05046	-7.79954	380.836	-4.25814
		0.0359	7.40292	53.7929	-4.60914	4.51471	-3.52954	-12.3795	378.086	-3.95314
		0.036	4.96292	50.1329	-4.09016	-1.89529	5.63046	-4.13954	383.576	7.33586
		0.0361	-0.527084	56.5329	-3.57098	-0.0652894	-1.08954	3.19046	387.546	-7.31014
		0.0362	1.60292	52.2629	-3.05436	-1.89529	5.32046	-2.30954	388.156	8.55586
		0.0363	4.65292	51.9629	-2.54317	-0.675289	-0.469541	6.24046	386.936	-3.34314
		0.0364	-3.88708	54.0929	-2.04038	0.544711	-0.779541	2.88046	389.986	-5.17414
		0.0365	-12.4371	53.1829	-1.54906	2.68471	1.66046	5.32046	397.316	-8.22614
		0.0366	1.60292	52.5729	-1.07232	-6.77529	-7.79954	-8.09954	385.106	-7.92114
		0.0367	2.82292	52.5729	-0.613321	0.244711	-4.43954	4.41046	378.386	-2.73314
		0.0368	8.93292	55.3129	-0.175245	-0.675289	-0.469541	-4.43954	380.226	0.92586
		0.0369	9.54292	45.5529	0.238743	6.04471	-1.99954	-2.30954	388.466	0.0158598
		0.037	3.43292	56.2329	0.625522	-7.69529	-11.1595	-3.21954	397.616	-0.90214
		0.0371	0.0829157	48.6029	0.982034	2.68471	0.140459	3.19046	397.006	-13.1091
		0.0372	4.04292	48.9029	1.30533	-4.03529	-0.469541	0.140459	400.666	-2.73314
		0.0373	1.30292	53.1829	1.59259	3.59471	1.97046	2.27046	400.976	2.14586
		0.0374	1.60292	59.8929	1.84116	3.59471	3.80046	4.71046	408.296	2.75586
		0.0375	4.35292	51.3529	2.04861	-5.25529	-3.21954	1.36046	411.956	1.23586
		0.0376	0.382916	51.6529	2.21271	-3.41529	2.58046	-0.169541	421.416	-1.81714
		0.0377	4.96292	61.4229	2.33149	4.20471	2.27046	-4.43954	411.046	-4.25814
		0.0378	2.21292	52.5729	2.40321	1.76471	-1.99954	-5.04954	410.736	-2.73314
		0.0379	2.82292	56.5329	2.42641	3.90471	-3.52954	4.71046	422.026	-6.09014
		0.038	-0.527084	66.9129	2.39995	3.59471	0.440459	-2.30954	412.266	7.64586
		0.0381	1.60292	69.9629	2.32302	-4.03529	4.71046	1.05046	417.756	13.7459
		0.0382	3.13292	65.6929	2.19519	5.12471	-2.30954	-0.169541	415.926	14.6659
		0.0383	3.43292	76.0729	2.01644	-1.28529	-4.13954	0.140459	430.876	21.3759
		0.0384	-2.66708	79.1229	1.78712	-3.41529	-0.779541	-4.74954	425.386	16.4959
		0.0385	-3.27708	82.4729	1.50797	0.854711	-0.469541	0.750459	418.366	20.4559
		0.0386	8.93292	82.1729	1.18014	4.81471	-1.69954	4.10046	430.266	25.6459
		0.0387	8.62292	73.0129	0.805168	-4.33529	1.05046	-1.99954	414.096	15.8859
		0.0388	8.93292	83.3929	0.384967	6.65471	-2.60954	1.36046	420.806	23.2059
		0.0389	-1.44708	90.4129	-0.0782126	1.15471	-0.469541	0.440459	423.866	27.7859
		0.039	0.992916	84.9229	-0.581769	8.48471	-1.38954	1.05046	425.696	28.3959
		0.0391	5.87292	87.3629	-1.12273	6.65471	-4.74954	-5.04954	420.506	26.2559
		0.0392	-0.227084	89.8029	-1.69776	-0.365289	-3.52954	-7.18954	417.146	31.7559
		0.0393	7.71292	88.8829	-2.30315	0.854711	-6.57954	-4.74954	427.526	25.3459
		0.0394	3.43292	90.7129	-2.93487	6.34471	-3.82954	-5.35954	417.456	38.4659
		0.0395	0.992916	92.8529	-3.58856	-0.975289	-0.779541	-3.21954	403.106	45.1759
		0.0396	10.7629	97.7329	-4.25961	-5.55529	5.93046	-12.6795	416.236	42.4359
		0.0397	-6.02708	94.3829	-4.94314	5.43471	-0.779541	-6.26954	413.486	44.8759
		0.0398	0.0829157	92.5429	-5.63407	3.59471	-3.21954	-3.52954	413.486	47.6259
		0.0399	7.10292	97.1229	-6.32717	4.81471	2.88046	-2.30954	410.126	64.7159
		0.04	8.32292	90.7129	-7.0171	5.73471	4.71046	-5.35954	414.096	52.8059
		0.0401	8.32292	86.4429	-7.69847	2.37471	8.68046	0.750459	415.626	51.2859
		0.0402	4.35292	97.7329	-8.36594	7.87471	3.49046	6.85046	411.046	57.6959
		0.0403	4.65292	90.4129	-9.01416	7.56471	3.49046	6.54046	416.536	52.8059
		0.0404	9.23292	90.1029	-9.63792	-1.89529	-1.08954	-4.43954	410.126	61.3559
		0.0405	7.71292	94.3829	-10.2321	1.76471	6.54046	0.140459	405.246	58.3059
		0.0406	9.84292	94.9929	-10.7917	7.26471	-5.04954	1.97046	414.096	63.4859
		0.0407	6.79292	95.2929	-11.312	4.20471	-2.30954	-4.43954	406.166	53.1159
		0.0408	4.04292	89.4929	-11.7883	2.37471	10.5105	-1.38954	413.176	56.4759
		0.0409	8.62292	88.2729	-12.2164	2.37471	1.05046	-1.99954	408.296	52.8059
		0.041	4.96292	84.6129	-12.5921	5.73471	4.10046	1.05046	407.996	54.6359
		0.0411	6.49292	91.9329	-12.9118	-1.28529	2.27046	7.15046	407.076	50.0659
		0.0412	0.992916	94.9929	-13.172	-0.365289	5.02046	6.24046	407.686	56.7759
		0.0413	8.93292	84.0029	-13.3696	-3.41529	6.85046	1.36046	414.096	55.5559
		0.0414	8.93292	91.6329	-13.502	3.29471	2.88046	-5.65954	415.926	53.7259
		0.0415	0.992916	95.9029	-13.5669	6.04471	12.6505	6.85046	407.686	54.9459
		0.0416	9.84292	84.3029	-13.5624	4.51471	13.5605	6.54046	418.066	55.8659
		0.0417	5.87292	92.2429	-13.4872	-3.11529	6.85046	-1.69954	410.736	48.5359
		0.0418	3.74292	94.9929	-13.3402	3.90471	13.2605	1.66046	415.626	59.2159
		0.0419	3.13292	98.9529	-13.1211	7.26471	9.29046	5.02046	419.896	54.9459
		0.042	-0.837084	105.363	-12.8298	3.90471	11.7305	1.66046	423.866	54.6359
		0.0421	5.57292	100.783	-12.4667	13.0547	13.5605	1.05046	422.026	58.3059
		0.0422	7.10292	105.363	-12.0329	10.3147	13.5605	0.440459	428.136	50.9759
		0.0423	-2.36708	104.753	-11.5296	10.9247	7.76046	-2.30954	434.236	54.9459
		0.0424	8.62292	105.973	-10.9588	-0.365289	12.0405	0.140459	437.286	54.3359
		0.0425	0.692916	107.803	-10.3228	-7.38529	9.60046	0.140459	444.616	52.1959
		0.0426	12.5929	114.523	-9.62433	10.6147	16.9205	0.750459	453.766	46.3959
		0.0427	-2.66708	114.823	-8.86659	5.73471	13.2605	-3.52954	456.816	43.6559
		0.0428	9.23292	106.893	-8.0532	6.04471	11.7305	-4.74954	454.076	54.0259
		0.0429	2.82292	116.963	-7.18818	-0.675289	8.68046	1.66046	463.226	50.6759
		0.043	2.21292	114.523	-6.27587	-5.86529	11.1205	-2.30954	457.126	48.5359
		0.0431	-1.13708	115.433	-5.32099	-1.28529	7.46046	2.58046	464.446	58.6059
		0.0432	-7.24708	115.133	-4.32853	-4.03529	4.41046	-4.13954	466.896	43.0459
		0.0433	-2.97708	120.323	-3.30382	1.46471	12.0405	0.750459	461.706	51.2859
		0.0434	-0.227084	119.713	-2.2525	8.17471	7.15046	-2.60954	455.906	57.0859
		0.0435	4.65292	123.673	-1.18045	4.81471	5.63046	0.140459	463.226	39.9959
		0.0436	2.21292	118.483	-0.0937927	2.98471	11.4305	-2.91954	455.906	44.5659
		0.0437	-2.36708	123.373	1.0012	6.34471	11.1205	-2.60954	461.396	50.3659
		0.0438	2.21292	113.913	2.09814	3.90471	3.49046	3.19046	460.176	42.1259
		0.0439	0.0829157	120.323	3.19056	14.5847	12.0405	7.15046	460.176	45.7859
		0.044	3.13292	125.813	4.27197	3.59471	7.46046	0.140459	464.446	49.7559
		0.0441	10.1529	120.623	5.33585	4.51471	12.0405	12.0405	468.416	46.3959
		0.0442	9.23292	116.653	6.37576	6.34471	15.0905	5.02046	464.146	43.6559
		0.0443	8.01292	115.743	7.3854	3.59471	8.38046	3.19046	459.266	50.3659
		0.0444	4.96292	116.963	8.35866	6.04471	17.2305	-3.52954	469.946	43.9559
		0.0445	13.5029	120.323	9.2897	3.90471	10.5105	5.02046	463.536	44.8759
		0.0446	15.0329	119.713	10.173	3.90471	8.07046	0.440459	460.786	40.2959
		0.0447	9.54292	115.743	11.0034	2.68471	7.46046	-1.38954	465.056	44.5659
		0.0448	16.8629	113.303	11.776	-0.0652894	8.07046	1.36046	464.146	37.8559
		0.0449	11.3729	114.823	12.4867	2.07471	10.2105	9.29046	463.536	36.6359
		0.045	13.2029	118.793	13.1315	3.29471	5.93046	2.88046	462.316	38.7759
		0.0451	12.5929	118.483	13.707	2.07471	8.38046	1.05046	460.176	42.4359
		0.0452	17.1729	115.433	14.2103	-0.365289	5.63046	0.440459	469.636	39.3859
		0.0453	11.9829	119.403	14.6392	13.0547	8.38046	-4.74954	455.296	42.7359
		0.0454	18.3929	120.933	14.9919	2.98471	8.68046	5.32046	468.116	38.7759
		0.0455	6.49292	113.913	15.2671	3.29471	8.68046	-0.469541	456.816	35.1059
		0.0456	5.57292	116.353	15.4642	-1.89529	7.15046	-1.38954	462.316	38.1559
		0.0457	15.0329	112.083	15.5831	10.9247	10.5105	6.85046	460.786	39.3859
		0.0458	11.6729	122.763	15.6242	5.43471	3.80046	-0.169541	456.816	32.6659
		0.0459	24.1929	111.163	15.5887	7.56471	12.6505	3.19046	466.286	42.4359
		0.046	16.5629	113.303	15.478	4.20471	10.8205	1.66046	460.786	34.8059
		0.0461	10.7629	115.743	15.2943	-0.975289	14.4805	-0.469541	465.366	46.0959
		0.0462	15.0329	122.763	15.04	7.26471	7.15046	-0.469541	464.446	39.9959
		0.0463	15.6429	123.063	14.7181	5.73471	9.90046	4.10046	469.026	53.4159
		0.0464	18.0829	112.993	14.332	7.26471	1.36046	2.27046	468.116	50.3659
		0.0465	9.54292	126.723	13.8852	1.46471	10.8205	0.140459	468.116	54.9459
		0.0466	3.43292	119.713	13.3819	2.68471	8.68046	5.63046	469.636	59.2159
		0.0467	17.4729	122.153	12.8264	0.544711	8.38046	-2.30954	468.416	56.4759
		0.0468	12.5929	116.043	12.2233	9.09471	7.15046	3.49046	461.096	58.6059
		0.0469	7.40292	117.573	11.5773	7.87471	5.32046	-2.91954	469.636	57.9959
		0.047	10.7629	129.173	10.8934	-4.33529	3.49046	-0.169541	465.976	61.3559
		0.0471	11.3729	113.303	10.1766	2.07471	0.140459	-5.04954	465.976	53.1159
		0.0472	6.79292	122.763	9.4322	-2.19529	2.88046	1.36046	466.896	60.4359
		0.0473	13.2029	117.263	8.66531	5.43471	6.54046	0.750459	467.196	57.0859
		0.0474	-1.44708	110.243	7.88114	4.81471	10.5105	-0.779541	459.876	50.9759
		0.0475	13.2029	118.793	7.08481	8.17471	2.27046	-1.38954	466.586	50.6759
		0.0476	14.7229	125.503	6.28136	0.544711	7.15046	3.80046	460.486	61.9659
		0.0477	6.18292	116.353	5.47568	1.76471	0.750459	1.05046	469.946	62.8759
		0.0478	17.7829	120.933	4.67248	1.46471	3.80046	3.19046	469.336	54.6359
		0.0479	17.7829	124.593	3.87625	3.29471	2.27046	3.49046	464.146	65.6259
		0.048	4.65292	120.933	3.09126	4.20471	7.46046	10.8205	480.316	54.9459
		0.0481	9.84292	126.113	2.32151	10.6147	5.32046	-0.469541	487.646	65.0159
		0.0482	7.40292	123.063	1.57068	-2.80529	3.80046	2.58046	483.066	66.2359
		0.0483	5.57292	117.873	0.842155	5.73471	14.4805	2.27046	494.356	75.0859
		0.0484	6.79292	123.373	0.138977	8.48471	7.15046	1.05046	489.476	73.5659
		0.0485	17.1729	120.933	-0.536159	3.59471	1.36046	0.140459	500.766	74.1759
		0.0486	13.2029	121.233	-1.18093	-1.28529	9.29046	1.05046	523.956	93.0959
		0.0487	12.8929	121.233	-1.79337	-2.19529	1.36046	4.71046	527.316	90.3459
		0.0488	5.26292	118.793	-2.37191	0.544711	3.80046	-3.21954	539.826	98.5859
		0.0489	8.01292	118.183	-2.9154	3.90471	4.10046	-0.779541	544.406	102.556
		0.049	12.8929	113.603	-3.42307	9.09471	1.66046	-6.57954	564.546	102.856
		0.0491	15.9529	121.233	-3.89457	-5.55529	5.63046	-4.43954	559.966	110.796
		0.0492	3.13292	107.503	-4.32987	0.244711	11.7305	-1.99954	565.156	116.286
		0.0493	10.1529	119.093	-4.72927	6.65471	8.99046	0.440459	567.906	107.436
		0.0494	8.93292	118.793	-5.09337	8.17471	11.7305	6.85046	577.976	122.086
		0.0495	9.84292	119.093	-5.42307	3.59471	5.93046	-0.169541	572.486	127.576
		0.0496	4.04292	119.093	-5.71951	1.15471	1.36046	-0.469541	576.446	127.576
		0.0497	3.43292	116.353	-5.98413	-3.41529	8.07046	4.71046	586.826	130.016
		0.0498	-0.227084	116.043	-6.21856	-0.365289	4.71046	0.140459	575.536	131.236
		0.0499	-9.07708	120.323	-6.42469	-1.58529	8.99046	4.41046	584.076	130.936
		0.05	0.0829157	118.793	-6.60459	1.46471	11.1205	-2.91954	589.576	130.936
		0.0501	-0.837084	109.333	-6.76052	1.76471	11.4305	0.750459	601.166	140.086
		0.0502	9.23292	127.033	-6.89492	1.15471	5.32046	1.05046	584.386	147.716
		0.0503	10.7629	118.793	-7.0103	4.20471	8.99046	5.02046	595.676	151.386
		0.0504	5.57292	119.403	-7.10929	-4.64529	3.19046	0.140459	610.016	155.956
		0.0505	-1.13708	118.793	-7.19458	0.244711	2.58046	-0.169541	631.076	152.606
		0.0506	-2.36708	115.133	-7.26891	4.81471	-0.169541	10.8205	634.126	152.296
		0.0507	4.04292	109.333	-7.33502	-0.0652894	0.750459	4.41046	642.066	159.006
		0.0508	3.13292	121.843	-7.39564	-1.28529	6.85046	6.85046	654.266	151.686
		0.0509	2.21292	129.783	-7.45349	5.73471	11.7305	-1.08954	647.246	155.346
		0.051	5.57292	123.983	-7.51122	5.12471	8.07046	8.99046	646.636	154.436
		0.0511	6.79292	121.843	-7.57141	7.87471	7.15046	0.750459	649.086	158.396
		0.0512	6.79292	129.783	-7.63651	4.20471	8.07046	4.71046	648.476	155.656
		0.0513	1.30292	131.613	-7.70885	7.87471	0.140459	-2.60954	652.436	157.486
		0.0514	1.60292	125.503	-7.79057	3.59471	-1.38954	3.80046	659.456	155.046
		0.0515	-5.41708	126.723	-7.88361	5.12471	4.10046	8.68046	664.336	153.216
		0.0516	-0.527084	127.953	-7.98978	2.68471	6.85046	6.54046	661.896	156.266
		0.0517	10.4529	128.863	-8.11072	-1.58529	2.58046	5.32046	675.936	160.846
		0.0518	0.692916	129.783	-8.24796	6.65471	-3.52954	-7.18954	685.396	156.566
		0.0519	0.0829157	125.503	-8.40284	-3.72529	-1.69954	8.68046	683.566	151.386
		0.052	-6.63708	127.953	-8.57657	5.12471	6.24046	4.10046	682.646	155.046
		0.0521	5.87292	123.063	-8.7702	-3.11529	10.8205	7.15046	682.956	150.466
		0.0522	2.52292	116.353	-8.9846	4.51471	0.750459	7.46046	682.956	149.546
		0.0523	2.82292	125.813	-9.2205	-1.89529	4.71046	2.88046	682.346	146.806
		0.0524	6.49292	127.953	-9.4785	3.29471	5.63046	-1.99954	698.516	138.256
		0.0525	8.62292	132.833	-9.759	-6.16529	7.76046	0.440459	696.076	151.686
		0.0526	10.7629	133.743	-10.0623	-3.41529	1.97046	5.63046	693.636	146.806
		0.0527	1.60292	126.113	-10.3886	0.244711	1.36046	3.19046	695.166	154.126
		0.0528	10.4529	127.953	-10.7378	1.15471	-2.30954	-1.69954	698.216	157.176
		0.0529	2.52292	135.883	-11.1099	-0.675289	5.93046	8.07046	699.436	153.826
		0.053	13.2029	120.323	-11.5048	-2.50529	1.97046	8.38046	694.556	161.756
		0.0531	12.8929	128.563	-11.9221	4.20471	11.7305	-1.69954	720.496	163.586
		0.0532	7.10292	128.563	-12.3613	-3.41529	10.8205	-1.69954	727.816	159.926
		0.0533	-1.44708	129.473	-12.8223	3.59471	3.19046	-0.779541	732.696	166.946
		0.0534	1.30292	113.303	-13.3044	7.87471	3.80046	8.68046	765.046	161.756
		0.0535	4.35292	124.283	-13.8072	-0.675289	7.76046	2.88046	769.626	157.176
		0.0536	0.692916	121.843	-14.3302	2.37471	4.10046	1.66046	785.796	156.266
		0.0537	2.52292	122.763	-14.8728	6.34471	7.76046	6.54046	804.106	152.606
		0.0538	4.35292	122.453	-15.4344	-4.64529	5.02046	3.19046	796.786	152.296
		0.0539	3.74292	120.323	-16.0143	0.854711	3.49046	2.27046	799.836	159.926
		0.054	7.71292	123.373	-16.6117	-1.58529	4.10046	-0.469541	822.426	158.096
		0.0541	4.04292	128.253	-17.2256	-0.675289	0.140459	-0.169541	843.786	162.066
		0.0542	-2.97708	123.063	-17.8551	-5.55529	5.63046	-1.38954	852.326	158.396
		0.0543	6.18292	133.743	-18.4989	-5.25529	5.02046	-0.169541	868.806	165.726
		0.0544	8.32292	116.963	-19.1557	-2.19529	3.19046	1.05046	865.146	159.316
		0.0545	-4.49708	122.453	-19.824	4.51471	7.76046	-0.469541	866.676	166.636
		0.0546	-3.58708	127.033	-20.5019	-0.0652894	3.80046	1.05046	860.876	166.946
		0.0547	3.13292	120.933	-21.1875	-2.19529	5.32046	0.440459	870.026	162.676
		0.0548	5.26292	125.203	-21.8788	-4.33529	8.99046	-4.74954	871.556	166.946
		0.0549	15.6429	123.983	-22.5733	2.37471	0.140459	7.46046	877.966	162.976
		0.055	4.04292	122.153	-23.2686	6.04471	6.54046	2.88046	885.286	174.266
		0.0551	3.43292	134.053	-23.9622	-0.365289	7.46046	-1.99954	884.986	169.086
		0.0552	17.4729	126.113	-24.6512	5.73471	4.71046	2.88046	882.236	173.356
		0.0553	8.01292	123.373	-25.3328	-2.50529	-1.38954	0.140459	876.436	170.306
		0.0554	11.9829	132.523	-26.0041	0.244711	4.10046	0.440459	883.156	173.966
		0.0555	4.65292	128.563	-26.6621	0.244711	-2.60954	-4.74954	882.536	168.776
		0.0556	13.5029	129.173	-27.3036	-0.0652894	-3.82954	4.10046	881.016	154.436
		0.0557	13.8129	135.573	-27.9257	-1.89529	0.750459	-2.30954	883.156	160.536
		0.0558	8.32292	134.353	-28.5253	-2.19529	0.440459	-1.38954	873.076	169.696
		0.0559	6.49292	129.473	-29.0993	1.76471	0.140459	-7.18954	875.216	157.786
		0.056	14.1129	136.183	-29.6447	0.544711	-2.60954	1.05046	875.216	155.346
		0.0561	13.8129	133.133	-30.1584	-6.77529	12.0405	-1.08954	876.746	169.386
		0.0562	0.382916	145.653	-30.6378	0.854711	8.68046	-6.87954	876.136	159.926
		0.0563	13.8129	143.813	-31.0799	0.854711	20.5805	-0.469541	873.996	156.266
		0.0564	6.18292	141.683	-31.4821	-1.89529	6.54046	-0.169541	865.456	155.956
		0.0565	11.0629	146.263	-31.8422	0.854711	-0.469541	-7.18954	864.536	156.266
		0.0566	9.23292	134.353	-32.1578	-4.33529	8.38046	15.0905	867.586	156.566
		0.0567	10.4529	144.423	-32.427	6.95471	2.88046	-1.38954	858.736	162.976
		0.0568	3.13292	148.093	-32.6481	-0.365289	4.71046	1.36046	856.296	160.536
		0.0569	9.84292	147.173	-32.8196	-2.50529	7.15046	3.49046	863.006	159.316
		0.057	6.79292	139.853	-32.9404	2.37471	13.8705	5.02046	859.956	161.456
		0.0571	9.84292	140.153	-33.0097	4.51471	-4.43954	0.750459	852.026	162.976
		0.0572	-5.10708	136.493	-33.0271	-3.41529	1.66046	6.85046	866.366	161.456
		0.0573	-1.44708	141.683	-32.9924	0.244711	0.140459	0.750459	842.566	156.266
		0.0574	6.18292	133.743	-32.9059	-1.89529	1.66046	1.66046	850.196	162.066
		0.0575	7.40292	148.093	-32.7683	3.90471	1.05046	1.05046	837.376	165.116
		0.0576	-0.227084	141.373	-32.5805	4.51471	5.93046	-4.74954	829.746	157.786
		0.0577	9.84292	138.933	-32.3439	8.48471	8.07046	4.10046	832.186	164.506
		0.0578	2.82292	141.073	-32.0602	-6.47529	-1.38954	-4.43954	827.606	155.046
		0.0579	3.74292	141.683	-31.7315	-3.11529	0.750459	4.71046	824.256	148.636
		0.058	9.23292	143.513	-31.36	4.20471	4.71046	7.15046	831.276	155.046
		0.0581	8.62292	139.243	-30.9482	3.59471	5.32046	5.93046	837.066	151.686
		0.0582	8.93292	144.733	-30.499	5.73471	-2.30954	-4.13954	834.326	148.026
		0.0583	9.84292	154.803	-30.0153	2.07471	7.76046	-2.91954	843.476	151.686
		0.0584	0.992916	150.533	-29.5004	-1.28529	11.7305	-3.52954	840.126	154.126
		0.0585	6.49292	152.663	-28.9576	6.04471	5.93046	-1.69954	840.426	149.856
		0.0586	5.57292	158.463	-28.3903	-2.19529	8.07046	6.85046	832.796	154.126
		0.0587	16.8629	152.363	-27.8022	12.4447	-3.52954	1.36046	841.956	162.676
		0.0588	8.32292	150.833	-27.1968	9.39471	3.80046	0.140459	860.266	154.126
		0.0589	0.692916	159.383	-26.578	-0.365289	3.49046	4.71046	859.656	154.736
		0.059	12.5929	152.053	-25.9495	-4.33529	5.93046	0.140459	854.766	152.906
		0.0591	1.60292	164.263	-25.3151	2.37471	9.90046	-6.87954	865.146	152.606
		0.0592	0.382916	161.513	-24.6786	4.81471	8.38046	-0.779541	862.396	149.856
		0.0593	-0.527084	174.643	-24.0436	-1.58529	8.99046	7.15046	867.896	159.006
		0.0594	4.65292	176.473	-23.4139	1.15471	8.99046	1.97046	857.826	155.046
		0.0595	8.32292	182.273	-22.793	2.37471	6.24046	2.88046	870.636	151.386
		0.0596	0.992916	174.643	-22.1843	-0.975289	-0.469541	-10.8495	863.006	152.906
		0.0597	7.71292	174.333	-21.5913	-1.58529	4.10046	2.58046	868.506	158.706
		0.0598	0.692916	182.273	-21.0171	0.244711	5.93046	-5.04954	874.916	159.616
		0.0599	4.65292	176.773	-20.4646	10.0047	8.38046	5.02046	880.096	154.736
		0.06	4.96292	180.743	-19.9368	-1.28529	-0.469541	4.10046	881.316	169.996
		0.0601	2.52292	182.573	-19.4361	-5.25529	-1.99954	-9.93954	889.866	166.636
		0.0602	9.84292	185.013	-18.9648	-1.58529	10.8205	1.36046	884.986	165.416
		0.0603	2.82292	188.063	-18.5249	-2.50529	5.32046	-6.26954	884.376	167.856
		0.0604	7.71292	186.233	-18.1183	3.90471	2.27046	8.07046	882.236	168.166
		0.0605	13.2029	186.843	-17.7463	0.544711	1.05046	0.750459	878.576	171.826
		0.0606	-0.837084	188.983	-17.4101	-2.50529	6.24046	4.71046	884.376	177.326
		0.0607	1.60292	194.783	-17.1106	-0.975289	3.19046	6.85046	891.086	167.556
		0.0608	0.382916	191.423	-16.8482	1.15471	5.93046	-3.21954	890.476	170.306
		0.0609	2.21292	192.953	-16.6232	1.46471	6.24046	4.41046	892.616	170.606
		0.061	-1.13708	198.143	-16.4354	-0.365289	2.27046	0.750459	893.526	171.526
		0.0611	10.4529	193.563	-16.2844	2.68471	0.440459	4.10046	901.156	159.616
		0.0612	2.21292	192.643	-16.1695	2.98471	0.750459	-3.21954	903.006	168.166
		0.0613	8.01292	201.493	-16.0894	-0.675289	5.02046	1.36046	904.806	171.216
		0.0614	5.87292	204.243	-16.0428	2.07471	7.15046	3.80046	915.506	166.336
		0.0615	5.26292	199.663	-16.0278	-0.675289	3.80046	-4.74954	921.306	162.976
		0.0616	2.21292	187.153	-16.0425	-0.365289	6.24046	5.02046	924.006	172.436
		0.0617	-0.227084	208.513	-16.0845	-0.675289	8.38046	4.71046	932.306	180.066
		0.0618	1.60292	204.543	-16.1514	-4.94529	2.27046	-1.69954	936.606	179.156
		0.0619	5.26292	196.913	-16.2406	-1.89529	4.10046	-1.38954	932.606	184.336
		0.062	15.9529	199.363	-16.3494	-0.975289	8.07046	-0.469541	938.406	190.136
		0.0621	7.71292	204.543	-16.4749	-6.77529	-2.60954	0.140459	955.506	191.056
		0.0622	9.23292	191.123	-16.6144	-0.675289	7.15046	3.49046	956.406	194.406
		0.0623	2.82292	199.973	-16.7649	-0.675289	-0.169541	2.58046	975.306	199.296
		0.0624	2.82292	193.863	-16.9235	2.68471	1.66046	-0.469541	972.306	199.906
		0.0625	14.1129	191.123	-17.0872	3.59471	1.97046	-3.52954	981.106	200.816
		0.0626	14.4229	186.233	-17.2532	4.81471	10.8205	-4.13954	989.706	203.566
		0.0627	14.7229	179.823	-17.4187	-9.52529	5.02046	-2.91954	989.006	205.096
		0.0628	11.6729	189.593	-17.5808	1.46471	1.97046	1.36046	992.706	207.536
		0.0629	15.3429	187.453	-17.737	4.20471	2.58046	-1.38954	989.306	209.366
		0.063	9.84292	194.783	-17.8846	-4.94529	7.76046	2.88046	997.606	213.336
		0.0631	5.26292	183.183	-18.0213	-0.0652894	8.68046	1.97046	1004.31	210.586
		0.0632	3.13292	189.593	-18.1447	-12.2653	-5.04954	1.66046	1011.31	204.486
		0.0633	5.87292	177.993	-18.2528	-2.19529	1.36046	1.05046	1013.51	202.956
		0.0634	4.04292	184.713	-18.3435	-5.25529	-3.82954	-1.08954	1019.31	214.246
		0.0635	1.30292	184.713	-18.4151	-2.19529	8.68046	-9.01954	1025.41	206.616
		0.0636	9.23292	193.563	-18.4662	0.544711	-0.169541	-6.26954	1028.11	213.336
		0.0637	11.3729	187.763	-18.4953	1.76471	1.97046	-3.21954	1029.61	214.556
		0.0638	3.43292	190.203	-18.5015	-8.30529	8.68046	3.19046	1031.81	206.006
		0.0639	1.60292	185.933	-18.4838	-4.94529	-0.779541	-1.69954	1047.91	199.906
		0.064	11.6729	179.523	-18.4416	-1.28529	3.19046	1.05046	1040.91	205.706
		0.0641	4.35292	193.563	-18.3743	5.12471	12.3405	0.140459	1046.11	200.206
		0.0642	8.01292	195.393	-18.2817	8.17471	5.93046	5.02046	1044.31	205.096
		0.0643	3.13292	193.863	-18.1638	1.76471	4.71046	3.80046	1044.01	197.466
		0.0644	8.62292	206.683	-18.0207	-2.50529	12.0405	-1.69954	1056.51	209.976
		0.0645	2.52292	219.503	-17.8525	3.29471	8.07046	-4.74954	1061.71	203.876
		0.0646	2.21292	224.993	-17.6599	-7.08529	4.41046	4.41046	1052.51	209.666
		0.0647	11.3729	217.673	-17.4434	2.98471	4.10046	1.36046	1065.91	214.246
		0.0648	0.692916	221.633	-17.204	-1.28529	1.97046	-1.38954	1070.51	213.336
		0.0649	4.65292	230.183	-16.9425	7.56471	7.46046	-2.60954	1073.91	221.576
		0.065	8.62292	226.823	-16.6602	-10.7453	2.58046	2.58046	1080.31	215.776
		0.0651	5.26292	227.433	-16.3583	3.90471	0.440459	-8.09954	1081.21	225.536
		0.0652	9.23292	230.793	-16.0382	9.70471	4.10046	1.97046	1087.01	213.636
		0.0653	15.0329	232.323	-15.7014	0.544711	-1.08954	-1.38954	1088.51	220.656
		0.0654	4.04292	234.763	-15.3495	2.68471	4.10046	-8.09954	1096.81	218.516
		0.0655	15.0329	235.983	-14.9843	0.244711	-5.35954	-1.38954	1115.11	213.026
		0.0656	7.71292	223.773	-14.6075	2.37471	-0.779541	-1.99954	1111.41	207.536
		0.0657	1.60292	226.823	-14.2208	6.95471	-0.169541	5.02046	1117.81	205.706
		0.0658	7.40292	235.373	-13.8263	2.07471	2.58046	-4.43954	1114.51	212.726
		0.0659	-0.527084	235.063	-13.4259	9.09471	0.440459	-10.5495	1117.51	208.756
		0.066	-3.88708	231.403	-13.0213	8.17471	-4.74954	-5.35954	1116.01	206.006
		0.0661	7.10292	241.473	-12.6144	4.51471	-7.79954	-1.38954	1118.71	214.856
		0.0662	9.84292	231.403	-12.2071	-4.33529	-4.13954	-9.93954	1120.91	208.146
		0.0663	12.5929	242.083	-11.801	8.48471	1.36046	3.49046	1110.21	203.266
		0.0664	4.35292	237.203	-11.398	11.2247	4.10046	-0.779541	1116.01	200.206
		0.0665	9.84292	229.873	-10.9995	8.17471	-4.43954	-14.5095	1118.11	210.276
		0.0666	1.60292	232.623	-10.6072	4.81471	0.440459	-1.99954	1131.31	212.726
		0.0667	8.62292	233.843	-10.2223	3.90471	8.38046	-3.82954	1129.71	210.276
		0.0668	9.84292	235.673	-9.84617	3.59471	2.58046	-8.40954	1138.01	199.296
		0.0669	8.32292	243.613	-9.47993	4.20471	2.88046	-1.99954	1155.41	194.716
		0.067	12.2829	239.033	-9.12455	2.68471	2.88046	-3.21954	1145.01	198.686
		0.0671	7.10292	239.643	-8.7809	5.43471	-3.82954	2.88046	1149.31	189.226
		0.0672	2.21292	239.643	-8.44971	3.59471	0.140459	0.440459	1143.21	195.636
		0.0673	9.23292	239.033	-8.13159	3.59471	2.88046	-3.82954	1156.91	192.886
		0.0674	-2.05708	241.173	-7.82702	8.17471	1.36046	2.88046	1150.21	183.726
		0.0675	5.57292	244.223	-7.53634	12.7547	-1.08954	-1.38954	1154.11	183.116
		0.0676	0.992916	243.613	-7.25974	4.20471	0.140459	-0.469541	1148.31	196.546
		0.0677	-3.58708	237.203	-6.99735	5.12471	1.05046	2.88046	1151.11	189.526
		0.0678	6.49292	234.763	-6.7491	2.68471	-4.74954	0.140459	1165.41	183.726
		0.0679	4.04292	241.783	-6.51478	3.29471	5.63046	-1.38954	1176.41	182.506
		0.068	6.49292	246.963	-6.29403	11.8347	-8.09954	-3.21954	1169.11	188.916
		0.0681	6.49292	243.303	-6.08635	2.07471	-8.70954	-1.99954	1172.51	184.946
		0.0682	1.60292	246.663	-5.89108	0.244711	-3.21954	-1.69954	1174.61	191.666
		0.0683	9.54292	237.203	-5.70743	4.20471	4.10046	4.71046	1171.21	188.006
		0.0684	2.52292	241.783	-5.53444	-6.16529	-2.60954	-0.779541	1168.81	189.226
		0.0685	-1.44708	241.473	-5.37105	4.51471	0.750459	-1.08954	1171.21	191.056
		0.0686	1.91292	245.743	-5.21607	5.73471	0.440459	-6.26954	1171.21	195.326
		0.0687	4.04292	243.913	-5.06824	6.65471	-1.99954	-1.69954	1159.91	198.076
		0.0688	-2.36708	240.253	-4.92617	1.46471	5.93046	-4.13954	1153.21	200.816
		0.0689	3.74292	244.223	-4.7884	-0.975289	1.97046	-3.82954	1145.31	199.296
		0.069	4.65292	239.333	-4.65338	-3.11529	-1.69954	1.05046	1151.41	200.516
		0.0691	3.13292	238.723	-4.51954	8.78471	-4.43954	3.49046	1145.31	220.346
		0.0692	-2.97708	239.943	-4.38523	3.59471	-0.169541	-1.38954	1148.31	211.196
		0.0693	4.65292	230.793	-4.24873	-5.55529	-1.99954	-0.779541	1151.71	205.706
		0.0694	3.43292	238.723	-4.10826	6.34471	-6.87954	-9.01954	1149.91	213.946
		0.0695	8.32292	230.793	-3.96201	6.95471	1.36046	-5.35954	1147.41	216.076
		0.0696	7.40292	238.723	-3.8081	-0.0652894	1.05046	-2.91954	1144.11	220.966
		0.0697	3.43292	238.723	-3.64459	-5.25529	-5.35954	-5.35954	1141.31	223.706
		0.0698	-0.227084	237.813	-3.46951	1.46471	1.66046	-3.21954	1130.61	224.626
		0.0699	7.71292	228.353	-3.28085	-1.28529	3.19046	-4.74954	1123.31	229.816
		0.07	0.0829157	242.693	-3.07657	0.544711	1.36046	-1.69954	1119.01	235.606
		0.0701	0.692916	236.593	-2.85466	-1.28529	-1.69954	-2.60954	1115.71	229.206
		0.0702	4.04292	238.423	-2.61308	6.65471	-4.13954	-6.26954	1116.31	239.276
		0.0703	0.992916	234.453	-2.34983	1.15471	-6.57954	5.32046	1104.41	244.156
		0.0704	1.60292	238.113	-2.06293	1.46471	0.750459	-2.30954	1108.71	238.356
		0.0705	8.62292	239.033	-1.75043	0.854711	0.440459	7.15046	1108.41	259.716
		0.0706	7.40292	230.483	-1.41044	1.46471	1.05046	-3.21954	1116.31	247.206
		0.0707	4.96292	236.593	-1.04112	3.90471	5.63046	3.19046	1120.01	250.256
		0.0708	6.18292	230.483	-0.640736	4.20471	-1.38954	3.49046	1120.61	245.376
		0.0709	0.692916	232.933	-0.207648	-0.0652894	-2.91954	-3.52954	1123.01	264.606
		0.071	8.62292	238.723	0.259659	-1.89529	-1.69954	-1.99954	1126.71	262.466
		0.0711	-5.10708	237.813	0.762567	-6.47529	-0.169541	1.36046	1116.31	268.876
		0.0712	2.82292	228.963	1.3023	6.34471	1.05046	-2.91954	1125.81	281.996
		0.0713	1.30292	242.393	1.87993	5.73471	2.58046	1.36046	1131.61	288.096
		0.0714	-0.527084	235.983	2.49629	0.244711	-1.69954	-5.04954	1125.11	299.696
		0.0715	-2.05708	236.893	3.15206	-4.33529	-1.69954	-1.38954	1135.21	303.056
		0.0716	12.5929	234.763	3.84764	1.15471	-0.169541	3.19046	1133.41	303.666
		0.0717	8.32292	242.693	4.5832	-4.64529	-2.30954	4.10046	1141.01	311.906
		0.0718	6.79292	239.033	5.35862	2.37471	4.71046	1.36046	1149.61	319.536
		0.0719	3.13292	237.813	6.17347	-5.25529	3.80046	-4.13954	1144.41	321.056
		0.072	10.4529	238.113	7.02696	6.95471	-1.69954	-3.21954	1146.81	324.416
		0.0721	-4.49708	241.173	7.91803	-3.72529	0.750459	-1.08954	1138.01	336.626
		0.0722	2.52292	239.033	8.84527	8.48471	-1.69954	7.76046	1138.61	339.066
		0.0723	10.1529	246.963	9.80701	2.07471	0.440459	0.140459	1141.01	324.106
		0.0724	6.49292	242.693	10.8013	7.26471	1.66046	-5.65954	1135.81	331.436
		0.0725	9.54292	236.283	11.8258	2.98471	0.140459	5.32046	1137.11	334.796
		0.0726	1.60292	248.793	12.8781	2.68471	-3.52954	-7.18954	1138.91	336.316
		0.0727	2.82292	258.263	13.9554	0.544711	-3.52954	1.97046	1138.01	345.476
		0.0728	9.84292	255.203	15.0547	2.07471	1.36046	-1.69954	1144.71	345.776
		0.0729	13.2029	249.413	16.1727	3.90471	-5.35954	4.41046	1141.31	348.526
		0.073	11.9829	252.153	17.3062	2.68471	3.80046	-3.52954	1141.01	345.776
		0.0731	7.71292	249.103	18.4517	-4.64529	-7.48954	1.97046	1148.01	343.036
		0.0732	15.9529	246.663	19.6056	3.59471	-7.18954	1.66046	1145.91	343.646
		0.0733	8.01292	258.873	20.7642	-0.675289	-0.469541	-4.74954	1149.61	337.236
		0.0734	13.2029	272.603	21.9239	-7.99529	2.27046	-7.79954	1147.71	337.536
		0.0735	0.382916	256.733	23.0808	1.46471	-0.469541	5.93046	1152.91	336.926
		0.0736	12.5929	269.853	24.2313	2.98471	3.80046	-1.99954	1141.01	347.916
		0.0737	7.10292	266.193	25.3717	-5.25529	1.97046	-4.74954	1154.81	340.286
		0.0738	11.9829	264.663	26.4983	-0.675289	-3.21954	-2.60954	1143.51	337.536
		0.0739	4.35292	271.383	27.6075	1.76471	3.19046	-4.13954	1145.31	327.466
		0.074	4.65292	278.093	28.696	-8.30529	3.19046	-3.21954	1145.01	323.806
		0.0741	11.0629	279.313	29.7603	7.87471	-5.96954	6.24046	1145.91	330.826
		0.0742	6.18292	292.133	30.7972	3.29471	-3.21954	-6.57954	1143.81	328.996
		0.0743	4.96292	297.623	31.8038	4.81471	1.97046	-8.40954	1146.21	324.726
		0.0744	3.74292	307.693	32.7772	5.73471	1.36046	-3.82954	1151.71	317.396
		0.0745	8.01292	316.853	33.7146	-0.0652894	0.140459	-8.40954	1164.81	321.056
		0.0746	8.62292	321.123	34.6136	-1.89529	0.140459	-8.09954	1163.01	315.256
		0.0747	2.82292	316.853	35.4718	3.29471	1.36046	-1.99954	1165.71	311.906
		0.0748	6.18292	334.853	36.2873	-0.0652894	0.140459	9.90046	1172.51	312.816
		0.0749	4.35292	338.523	37.058	-1.28529	-7.79954	1.05046	1161.21	305.796
		0.075	0.692916	327.843	37.7825	-2.50529	5.63046	-4.13954	1160.91	303.666
		0.0751	9.84292	337.303	38.4592	-1.28529	-2.30954	-1.69954	1153.51	308.546
		0.0752	8.32292	342.483	39.0869	-1.89529	-0.469541	-0.779541	1148.61	308.856
		0.0753	5.87292	350.723	39.6648	-0.365289	0.140459	-3.82954	1155.11	308.246
		0.0754	5.87292	349.503	40.192	3.29471	-2.60954	-1.69954	1156.91	313.736
		0.0755	9.84292	347.673	40.668	6.65471	-5.35954	-0.469541	1152.91	303.356
		0.0756	10.7629	349.813	41.0925	6.34471	-2.91954	-10.2395	1150.51	294.506
		0.0757	9.54292	354.693	41.4655	8.17471	-4.74954	-1.69954	1145.01	298.476
		0.0758	6.79292	359.573	41.7871	0.854711	3.80046	-2.91954	1143.51	295.116
		0.0759	8.01292	355.613	42.0575	2.37471	5.63046	-5.04954	1145.61	289.316
		0.076	1.30292	357.133	42.2772	2.68471	0.440459	-3.82954	1145.91	301.226
		0.0761	7.40292	349.203	42.4471	-0.975289	9.29046	2.27046	1141.61	287.186
		0.0762	9.54292	362.013	42.5679	3.59471	1.97046	-1.69954	1146.81	282.306
		0.0763	2.52292	367.203	42.6407	-0.0652894	-0.169541	0.140459	1148.01	282.916
		0.0764	4.35292	365.373	42.6666	0.854711	-2.60954	3.49046	1150.51	285.966
		0.0765	2.21292	388.573	42.6469	-10.1353	5.02046	6.54046	1157.51	285.046
		0.0766	6.49292	382.163	42.5831	2.07471	-1.08954	2.27046	1153.51	283.526
		0.0767	10.4529	382.773	42.4769	-7.99529	7.15046	-1.38954	1153.51	294.506
		0.0768	1.60292	385.513	42.33	-7.38529	-0.779541	1.66046	1167.91	292.986
		0.0769	7.71292	392.533	42.1444	-11.0453	-3.52954	0.440459	1174.91	301.526
		0.077	14.4229	386.123	41.9221	-18.0653	-9.62954	5.32046	1196.31	302.136
		0.0771	9.54292	393.753	41.6653	-12.2653	-3.21954	1.05046	1201.41	304.886
		0.0772	8.32292	393.143	41.3761	-10.4353	-5.96954	-5.65954	1209.71	307.016
		0.0773	7.10292	394.063	41.057	-9.52529	-6.87954	-4.74954	1216.71	303.966
		0.0774	1.91292	401.383	40.7105	-8.91529	8.68046	-3.21954	1209.71	310.076
		0.0775	-0.837084	397.423	40.3391	-13.1853	-4.43954	-2.30954	1200.81	305.186
		0.0776	0.0829157	380.333	39.9458	-22.0353	-0.469541	3.19046	1199.61	312.206
		0.0777	7.40292	388.573	39.5333	-13.1853	-5.65954	5.02046	1200.21	305.496
		0.0778	3.13292	389.183	39.1047	-17.1553	-3.82954	7.15046	1189.81	320.146
		0.0779	10.7629	393.453	38.6632	-15.6253	-8.09954	1.66046	1195.31	311.906
		0.078	4.96292	398.333	38.212	-24.1753	-8.70954	-3.82954	1201.71	321.366
		0.0781	-0.227084	398.643	37.7547	-10.1353	-6.87954	-1.38954	1194.11	314.346
		0.0782	3.43292	402.303	37.2947	-15.3253	-13.8995	-5.04954	1205.11	317.706
		0.0783	3.74292	398.033	36.8358	-5.55529	-5.65954	-1.08954	1209.41	321.366
		0.0784	3.13292	395.583	36.3817	-7.99529	-14.5095	3.80046	1204.51	314.036
		0.0785	3.43292	403.823	35.9364	-7.99529	-3.82954	-4.13954	1205.71	321.366
		0.0786	-0.227084	399.253	35.5037	-7.38529	-8.70954	1.97046	1220.41	329.606
		0.0787	6.18292	399.553	35.0877	-7.38529	-6.57954	0.440459	1215.21	316.786
		0.0788	0.992916	406.883	34.6924	-4.03529	-15.4295	-9.01954	1226.81	328.386
		0.0789	7.71292	400.163	34.3216	-7.69529	-7.18954	5.02046	1239.91	316.486
		0.079	0.992916	390.403	33.9794	0.854711	-6.26954	5.93046	1231.01	319.836
		0.0791	-6.02708	392.843	33.6695	0.854711	-4.43954	-0.779541	1223.11	323.806
		0.0792	11.9829	396.803	33.3958	1.76471	-11.1595	-1.99954	1226.51	317.396
		0.0793	5.26292	402.913	33.1618	-3.41529	-7.18954	-5.35954	1231.01	318.926
		0.0794	5.26292	410.843	32.9711	8.48471	-8.40954	-0.779541	1222.81	312.816
		0.0795	-2.66708	412.063	32.8268	9.39471	-18.7895	4.71046	1225.61	320.446
		0.0796	4.35292	407.493	32.732	2.37471	-10.8495	-4.43954	1216.41	318.006
		0.0797	14.4229	402.913	32.6895	3.29471	-2.60954	-3.82954	1230.41	314.646
		0.0798	2.82292	422.443	32.7017	0.854711	2.88046	-3.52954	1235.01	318.316
		0.0799	-0.527084	416.643	32.7707	4.81471	-2.30954	4.71046	1231.71	320.756
		0.08	6.18292	423.363	32.8984	-0.0652894	-8.09954	-5.04954	1245.11	321.666
		0.0801	3.13292	415.733	33.086	8.17471	3.49046	0.750459	1255.81	324.416
		0.0802	8.32292	417.863	33.3348	4.20471	-1.99954	-5.04954	1244.21	321.056
		0.0803	5.26292	412.373	33.6452	14.5847	-1.99954	-1.69954	1253.61	315.866
		0.0804	-0.227084	409.013	34.0177	3.90471	7.15046	-1.69954	1259.41	325.636
		0.0805	-2.66708	405.663	34.4522	8.17471	-0.469541	-4.74954	1263.41	336.316
		0.0806	0.692916	408.103	34.9481	6.95471	-5.96954	-6.57954	1257.31	333.876
		0.0807	1.91292	401.083	35.5047	11.2247	-4.43954	5.63046	1259.11	339.676
		0.0808	1.60292	403.213	36.121	-1.28529	0.140459	-4.43954	1258.81	345.166
		0.0809	-5.10708	405.963	36.7953	13.9747	-1.38954	1.36046	1273.51	350.966
		0.081	8.01292	414.813	37.5259	3.90471	1.36046	9.29046	1253.91	347.606
		0.0811	7.40292	406.883	38.3106	11.5347	-3.82954	9.29046	1251.81	352.496
		0.0812	8.93292	400.473	39.1471	10.3147	-4.43954	3.80046	1263.71	353.406
		0.0813	12.2829	401.993	40.0324	11.2247	-12.9895	-1.08954	1253.91	344.866
		0.0814	2.21292	406.883	40.9637	6.04471	1.36046	0.750459	1253.01	350.046
		0.0815	8.01292	410.843	41.9376	16.1147	-9.01954	-0.169541	1259.71	353.406
		0.0816	9.23292	403.523	42.9507	9.70471	-2.60954	-13.8995	1249.71	341.506
		0.0817	3.74292	405.353	43.9994	15.1947	-7.48954	-0.469541	1244.81	360.736
		0.0818	2.82292	416.953	45.0799	2.37471	-8.40954	1.97046	1257.31	362.256
		0.0819	1.30292	409.323	46.1883	12.7547	-8.70954	3.80046	1254.51	355.846
		0.082	11.9829	416.343	47.3208	8.78471	-6.57954	-3.82954	1253.01	365.616
		0.0821	0.0829157	404.743	48.4735	12.1447	1.36046	4.41046	1244.21	368.976
		0.0822	13.2029	407.493	49.6425	18.2447	-1.08954	-5.35954	1245.41	366.226
		0.0823	0.0829157	409.623	50.824	14.5847	-1.08954	0.440459	1258.51	364.396
		0.0824	7.10292	405.963	52.0143	11.5347	-3.82954	-5.65954	1262.21	370.496
		0.0825	3.74292	408.403	53.21	9.09471	-9.93954	1.97046	1269.21	378.126
		0.0826	2.82292	400.163	54.4073	17.6347	-4.43954	-5.35954	1261.61	375.076
		0.0827	4.65292	404.743	55.6032	12.4447	-6.57954	-1.69954	1253.01	372.936
		0.0828	-2.36708	402.603	56.7943	14.5847	-4.43954	-0.469541	1259.11	373.546
		0.0829	4.04292	406.883	57.9777	14.5847	5.93046	-6.57954	1257.31	374.156
		0.083	4.65292	406.883	59.1508	11.2247	-5.65954	-0.779541	1260.31	386.976
		0.0831	7.40292	409.323	60.3112	17.6347	-14.2095	-0.779541	1257.01	377.216
		0.0832	6.49292	407.493	61.4566	13.3647	-8.70954	-0.169541	1250.91	377.826
		0.0833	6.79292	406.883	62.5853	14.2847	-6.57954	-5.96954	1261.61	387.896
		0.0834	4.04292	409.013	63.6956	10.0047	-2.91954	-9.32954	1248.41	384.226
		0.0835	5.26292	397.423	64.7862	8.78471	-2.60954	4.10046	1242.61	385.756
		0.0836	-2.97708	395.283	65.8564	14.8947	-5.35954	-5.04954	1233.21	404.676
		0.0837	4.96292	407.493	66.9053	11.8347	-4.13954	-12.3795	1233.81	394.306
		0.0838	1.60292	409.013	67.9327	16.7247	-11.1595	-2.30954	1237.11	410.476
		0.0839	8.93292	402.603	68.9383	9.09471	-2.91954	-7.79954	1232.31	409.556
		0.084	5.57292	411.153	69.9225	9.09471	-5.04954	-0.779541	1227.41	424.206
		0.0841	13.5029	406.573	70.8855	11.8347	-7.79954	-2.91954	1228.01	427.256
		0.0842	12.2829	407.793	71.828	2.98471	-9.32954	-0.469541	1228.01	430.316
		0.0843	9.84292	418.783	72.7508	20.6847	-9.62954	-3.52954	1216.41	443.736
		0.0844	3.43292	414.203	73.6547	12.1447	-5.35954	-4.13954	1227.11	450.146
		0.0845	4.04292	419.083	74.5409	13.0547	-1.08954	-2.91954	1228.91	435.806
		0.0846	13.8129	425.493	75.4102	13.0547	-5.04954	3.19046	1234.11	437.946
		0.0847	4.65292	418.473	76.2637	19.1647	-2.60954	-10.5495	1227.11	442.516
		0.0848	4.96292	418.783	77.1026	20.3847	-6.26954	2.88046	1217.91	440.996
		0.0849	14.4229	422.443	77.9277	8.17471	-3.21954	-1.69954	1223.71	445.566
		0.085	9.54292	429.153	78.74	16.4147	4.41046	3.80046	1221.31	453.806
		0.0851	8.32292	423.973	79.5403	17.0247	2.58046	-3.52954	1213.31	461.436
		0.0852	7.10292	424.883	80.3292	18.8547	-0.469541	-3.82954	1204.81	458.386
		0.0853	14.7229	427.323	81.1073	10.0047	-3.82954	1.36046	1207.91	454.116
		0.0854	-3.58708	429.763	81.8749	14.8947	-4.43954	1.05046	1201.41	458.996
		0.0855	5.57292	430.073	82.6325	14.8947	-4.74954	0.750459	1198.41	466.016
		0.0856	6.79292	430.373	83.3801	14.2847	2.58046	-12.9895	1199.01	474.256
		0.0857	1.60292	433.733	84.1179	13.3647	-0.469541	-7.79954	1198.11	468.456
		0.0858	-1.13708	434.343	84.8458	20.9947	-6.26954	-11.1595	1200.81	481.276
		0.0859	3.74292	433.433	85.5636	15.8047	-2.60954	0.140459	1193.81	487.986
		0.086	1.30292	435.563	86.2713	20.9947	-0.779541	0.140459	1189.81	489.516
		0.0861	9.23292	432.213	86.9685	16.4147	-2.60954	4.10046	1199.31	491.956
		0.0862	1.60292	437.703	87.6549	15.8047	-0.779541	-0.169541	1189.51	500.506
		0.0863	7.40292	441.363	88.33	16.1147	-6.57954	-2.30954	1186.51	488.906
		0.0864	0.0829157	438.613	88.9933	8.17471	-7.48954	-4.13954	1189.51	493.486
		0.0865	1.91292	445.633	89.6444	11.5347	-1.08954	-5.04954	1177.61	501.416
		0.0866	8.62292	438.003	90.2827	12.7547	-6.57954	-5.04954	1169.71	500.506
		0.0867	4.96292	432.513	90.9077	14.2847	-8.70954	1.66046	1174.91	503.856
		0.0868	-1.74708	440.453	91.5189	16.4147	-3.82954	-7.48954	1177.91	502.026
		0.0869	0.992916	442.893	92.1158	14.2847	-2.91954	-5.04954	1181.61	518.506
		0.087	6.49292	445.943	92.698	4.51471	0.750459	1.05046	1183.71	526.746
		0.0871	3.43292	433.433	93.265	22.2147	-3.21954	-4.43954	1170.01	535.596
		0.0872	1.60292	436.783	93.8166	14.2847	-4.43954	-5.65954	1170.01	549.326
		0.0873	10.4529	440.453	94.3523	20.9947	-5.04954	-2.60954	1167.61	553.296
		0.0874	1.60292	442.893	94.8721	8.78471	0.140459	-9.01954	1173.41	561.536
		0.0875	2.82292	437.093	95.3759	18.2447	-4.43954	-9.01954	1174.01	570.696
		0.0876	5.87292	442.283	95.8638	14.5847	0.140459	-1.99954	1166.31	569.776
		0.0877	3.43292	435.563	96.3361	14.5847	-9.93954	1.97046	1188.91	578.936
		0.0878	0.382916	432.213	96.793	5.43471	-7.48954	3.19046	1186.21	579.546
		0.0879	-2.05708	431.293	97.235	7.87471	-8.40954	-5.35954	1198.71	580.456
		0.088	-0.527084	435.263	97.6627	13.6747	-10.2395	1.97046	1195.61	580.156
		0.0881	-5.41708	440.753	98.0766	7.26471	-16.6495	-0.169541	1209.71	586.256
		0.0882	-9.68708	445.333	98.4777	13.9747	-15.4295	1.05046	1209.11	590.526
		0.0883	-3.88708	434.953	98.8668	16.7247	-7.79954	7.76046	1219.41	589.616
		0.0884	-4.80708	439.833	99.2449	17.9447	-14.2095	-9.62954	1239.01	596.636
		0.0885	0.0829157	438.313	99.6129	10.0047	-18.4795	0.750459	1229.51	595.106
		0.0886	1.30292	446.243	99.9717	15.8047	-11.1595	1.97046	1240.21	603.346
		0.0887	-13.0471	434.653	100.322	-1.89529	-14.5095	6.24046	1250.31	610.056
		0.0888	-5.10708	436.483	100.666	11.8347	-13.5995	-3.52954	1268.91	616.466
		0.0889	-1.13708	438.923	101.003	13.9747	-12.6795	-2.60954	1278.01	617.076
		0.089	-4.19708	428.543	101.334	15.8047	-15.4295	-0.169541	1289.01	602.736
		0.0891	0.992916	433.733	101.661	7.87471	-14.2095	-4.13954	1288.41	614.026
		0.0892	-3.58708	427.933	101.983	14.5847	-9.01954	1.97046	1297.61	603.346
		0.0893	-1.74708	425.193	102.3	6.95471	-12.3795	-0.169541	1295.11	601.206
		0.0894	1.91292	430.073	102.614	15.1947	-8.40954	-7.48954	1295.71	603.046
		0.0895	0.0829157	424.883	102.923	9.70471	-1.99954	-7.48954	1301.81	598.156
		0.0896	4.04292	425.803	103.228	10.9247	-8.40954	-3.21954	1304.61	592.056
		0.0897	10.1529	426.713	103.528	5.12471	-7.48954	-1.38954	1294.21	594.496
		0.0898	-1.13708	430.373	103.824	2.68471	-3.82954	3.19046	1297.31	594.806
		0.0899	-6.93708	432.513	104.113	15.8047	2.88046	3.19046	1297.91	592.666
		0.09	-11.5171	423.053	104.396	10.9247	-5.96954	-4.74954	1291.51	604.876
		0.0901	-3.27708	420.303	104.672	6.34471	-8.09954	5.63046	1299.71	591.136
		0.0902	1.30292	430.373	104.94	10.3147	1.05046	-2.60954	1299.71	585.646
		0.0903	-2.05708	421.523	105.199	2.68471	-5.96954	2.27046	1301.51	593.276
		0.0904	-1.44708	418.473	105.449	0.544711	1.05046	2.88046	1293.31	587.176
		0.0905	-2.97708	426.713	105.688	15.8047	-0.169541	-3.52954	1296.01	576.186
		0.0906	0.692916	408.103	105.915	4.20471	-5.65954	-4.43954	1288.41	575.576
		0.0907	-4.19708	412.673	106.131	2.98471	7.46046	-5.65954	1290.61	583.816
		0.0908	-5.41708	414.813	106.335	-2.19529	-6.26954	-3.52954	1284.11	588.696
		0.0909	-3.88708	420.303	106.525	3.90471	4.71046	1.05046	1279.61	588.086
		0.091	1.60292	414.813	106.702	3.90471	-3.82954	2.58046	1286.91	580.766
		0.0911	0.382916	424.273	106.866	-0.0652894	-1.99954	1.97046	1295.41	589.006
		0.0912	3.13292	427.933	107.015	3.90471	-1.08954	0.140459	1292.11	598.766
		0.0913	-6.02708	420.613	107.149	-0.675289	-2.30954	0.140459	1289.61	605.176
		0.0914	-0.837084	420.613	107.269	-1.58529	-6.26954	0.440459	1289.91	602.436
		0.0915	-2.05708	431.293	107.375	2.07471	3.49046	5.93046	1298.81	612.196
		0.0916	3.74292	428.243	107.466	10.0047	3.49046	-1.38954	1300.61	609.446
		0.0917	-9.37708	424.883	107.543	6.95471	-4.43954	-9.93954	1295.71	608.536
		0.0918	-4.80708	426.413	107.605	9.70471	2.88046	5.93046	1298.81	612.196
		0.0919	-19.1471	429.763	107.654	8.78471	-0.779541	0.440459	1317.11	612.806
		0.092	-5.71708	441.063	107.69	7.26471	0.750459	-2.60954	1311.61	610.976
		0.0921	3.13292	436.783	107.713	6.65471	-3.21954	1.05046	1301.21	608.836
		0.0922	-9.68708	438.003	107.723	10.6147	-1.69954	-9.93954	1300.61	614.636
		0.0923	-3.27708	431.293	107.722	4.51471	-1.38954	0.140459	1306.71	612.196
		0.0924	0.992916	437.393	107.71	6.04471	-2.91954	-1.08954	1303.71	611.286
		0.0925	-12.7371	442.283	107.689	-1.89529	-1.99954	-0.469541	1297.91	616.166
		0.0926	-2.66708	442.283	107.659	7.87471	0.140459	-5.35954	1298.51	615.246
		0.0927	-4.19708	426.713	107.622	12.7547	-3.21954	3.80046	1294.81	619.516
		0.0928	0.992916	436.783	107.577	9.70471	-3.52954	-3.52954	1296.71	613.116
		0.0929	-0.527084	423.053	107.528	1.76471	-5.35954	1.66046	1292.11	620.136
		0.093	-2.05708	430.983	107.474	4.20471	3.19046	-2.91954	1297.01	625.626
		0.0931	-11.5171	440.453	107.416	8.17471	2.58046	-5.35954	1302.21	625.316
		0.0932	-4.49708	441.973	107.357	4.51471	-3.52954	3.49046	1299.71	633.256
		0.0933	-11.5171	440.143	107.298	14.5847	0.750459	1.05046	1292.41	628.986
		0.0934	-4.19708	442.583	107.239	12.1447	-3.21954	-5.96954	1302.81	632.336
		0.0935	-9.37708	450.213	107.182	10.3147	1.66046	-0.469541	1312.21	625.626
		0.0936	-2.05708	447.463	107.129	2.68471	-4.43954	-10.2395	1312.51	629.286
		0.0937	-6.32708	457.533	107.081	5.73471	-1.99954	-10.2395	1317.71	630.206
		0.0938	-3.88708	451.433	107.039	13.3647	1.97046	-3.21954	1319.51	630.206
		0.0939	0.692916	460.893	107.005	6.95471	4.41046	0.750459	1330.51	637.836
		0.094	1.60292	461.813	106.98	9.09471	-0.169541	-2.30954	1330.21	631.426
		0.0941	-2.05708	459.983	106.965	8.78471	0.140459	-6.26954	1325.01	635.696
		0.0942	-4.49708	457.533	106.961	-0.365289	2.88046	2.88046	1322.31	633.256
		0.0943	-0.227084	456.313	106.97	15.5047	-7.48954	-8.09954	1330.21	641.496
		0.0944	-8.15708	467.613	106.992	0.544711	3.19046	1.05046	1330.51	636.606
		0.0945	-1.13708	460.593	107.027	0.854711	-0.469541	-3.82954	1330.51	632.646
		0.0946	-5.41708	460.893	107.078	7.26471	4.10046	-2.30954	1328.71	628.066
		0.0947	-11.5171	463.643	107.143	9.39471	0.440459	-1.38954	1341.51	625.316
		0.0948	-6.63708	466.383	107.223	9.39471	2.58046	0.750459	1338.81	628.366
		0.0949	-3.58708	479.203	107.319	3.90471	-1.69954	-0.779541	1332.71	633.866
		0.095	-8.46708	470.053	107.429	11.8347	0.750459	-1.99954	1333.01	623.796
		0.0951	-6.32708	479.203	107.553	7.26471	-1.38954	-2.30954	1332.11	619.216
		0.0952	3.13292	483.173	107.692	6.95471	-15.7295	1.36046	1319.21	622.876
		0.0953	-2.05708	479.513	107.844	14.2847	3.80046	-8.70954	1322.91	614.946
		0.0954	-10.5971	496.603	108.009	8.78471	5.93046	-11.4595	1326.01	622.266
		0.0955	-4.49708	501.483	108.186	6.65471	1.97046	-5.35954	1326.61	618.606
		0.0956	-4.80708	498.433	108.374	14.2847	-4.43954	-1.69954	1326.91	603.346
		0.0957	10.4529	508.803	108.572	7.56471	0.140459	6.24046	1325.31	609.446
		0.0958	-3.88708	511.863	108.779	4.81471	4.41046	1.97046	1317.71	619.516
		0.0959	5.57292	509.113	108.994	13.0547	-7.79954	0.440459	1318.01	608.836
		0.096	-0.227084	514.303	109.215	6.95471	-1.69954	4.41046	1321.41	617.686
		0.0961	2.21292	532.913	109.442	1.76471	-4.43954	-1.69954	1334.21	616.776
		0.0962	-0.227084	528.343	109.672	2.07471	-4.43954	-2.30954	1327.81	618.296
		0.0963	-2.66708	535.973	109.904	5.73471	-2.60954	-15.7295	1336.91	628.066
		0.0964	3.13292	535.973	110.138	-0.675289	0.750459	-4.43954	1342.11	632.036
		0.0965	6.49292	546.343	110.371	10.9247	-12.3795	1.05046	1334.81	638.446
		0.0966	2.82292	537.803	110.602	4.20471	-3.21954	-3.21954	1348.51	640.576
		0.0967	-3.88708	548.783	110.83	9.09471	0.440459	3.19046	1348.21	646.076
		0.0968	0.692916	545.733	111.054	2.07471	-6.57954	-3.21954	1353.41	640.576
		0.0969	0.382916	550.923	111.271	-2.80529	-6.87954	-0.779541	1339.11	647.296
		0.097	-1.13708	550.003	111.48	-0.0652894	4.10046	-3.82954	1339.41	638.446
		0.0971	-2.36708	551.833	111.68	10.3147	-0.169541	-4.43954	1345.81	644.846
		0.0972	-0.527084	542.373	111.869	3.59471	-4.43954	-0.469541	1347.31	644.546
		0.0973	-9.37708	547.873	112.045	3.90471	-1.99954	-1.69954	1345.21	649.126
		0.0974	1.60292	545.433	112.207	-0.675289	-8.09954	-3.21954	1341.81	637.226
		0.0975	2.21292	542.373	112.353	0.244711	-10.8495	-13.2895	1338.81	641.796
		0.0976	1.91292	548.483	112.48	8.48471	-4.43954	2.88046	1334.51	639.966
		0.0977	-5.71708	538.413	112.587	2.98471	-4.13954	1.05046	1327.51	630.506
		0.0978	-5.10708	546.043	112.672	1.15471	-9.93954	1.36046	1326.31	629.286
		0.0979	-2.66708	539.023	112.733	4.20471	-1.08954	4.41046	1329.91	624.706
		0.098	-11.8271	545.733	112.767	1.46471	-10.2395	-8.40954	1339.41	633.256
		0.0981	-11.5171	539.933	112.773	1.76471	-5.96954	3.49046	1344.31	623.486
		0.0982	-9.68708	533.523	112.748	-3.72529	-1.99954	1.97046	1336.91	635.696
		0.0983	-10.9071	534.133	112.691	0.544711	-10.2395	5.63046	1331.41	633.256
		0.0984	-9.98708	541.153	112.6	3.59471	-4.13954	-5.04954	1337.61	629.596
		0.0985	7.71292	540.853	112.472	-0.675289	-3.21954	-8.09954	1332.71	629.286
		0.0986	-3.88708	542.683	112.307	-2.19529	-10.2395	0.440459	1339.71	631.426
		0.0987	-2.05708	538.103	112.104	-1.58529	-17.2595	-6.26954	1350.11	625.316
		0.0988	-4.80708	523.763	111.861	-1.89529	-15.7295	-3.82954	1346.71	624.706
		0.0989	-4.80708	534.443	111.579	2.98471	-10.2395	-4.74954	1345.51	615.556
		0.099	-11.2171	525.593	111.257	-0.0652894	-16.6495	-5.04954	1359.51	617.076
		0.0991	-0.837084	527.423	110.897	-0.365289	-19.3995	-4.13954	1357.11	621.356
		0.0992	-6.93708	533.223	110.498	3.29471	-12.3795	-0.779541	1365.61	615.856
		0.0993	0.0829157	535.973	110.063	-1.58529	-15.4295	1.36046	1370.51	607.316
		0.0994	-3.58708	530.173	109.593	2.98471	-14.5095	-0.469541	1366.51	614.946
		0.0995	-11.8271	527.733	109.092	3.59471	-13.5995	0.140459	1357.71	608.536
		0.0996	-2.97708	526.503	108.562	-11.9653	-11.4595	-0.169541	1360.11	619.216
		0.0997	1.60292	524.373	108.007	-0.0652894	-10.2395	-2.30954	1349.81	616.776
		0.0998	-5.71708	533.523	107.432	0.544711	-3.52954	1.66046	1344.31	621.966
		0.0999	-3.27708	524.673	106.843	4.81471	-9.62954	-2.30954	1349.51	630.816
		0.1	-5.41708	527.423	106.245	3.59471	-13.5995	-3.52954	1347.01	633.866
		0.1001	0.992916	520.103	105.644	5.12471	-8.70954	-9.32954	1347.31	649.736
		0.1002	1.60292	521.323	105.048	4.51471	-6.26954	1.05046	1347.31	653.696
		0.1003	-2.66708	512.163	104.465	2.98471	-2.30954	3.19046	1354.31	659.806
		0.1004	-3.27708	521.323	103.902	3.90471	-14.5095	-5.65954	1350.71	668.346
		0.1005	5.26292	534.133	103.369	11.8347	-6.87954	-2.91954	1350.71	674.756
		0.1006	1.60292	537.193	102.874	15.8047	-0.469541	-3.82954	1346.11	680.556
		0.1007	-0.837084	539.323	102.426	11.2247	-3.21954	-5.96954	1347.61	683.306
		0.1008	0.382916	547.563	102.036	1.76471	-12.6795	-3.52954	1334.81	677.806
		0.1009	-4.49708	563.743	101.713	8.17471	-8.70954	-0.169541	1335.41	680.866
		0.101	3.13292	578.383	101.466	13.6747	-5.65954	0.140459	1335.71	684.826
		0.1011	2.52292	585.103	101.306	13.6747	-10.5495	0.140459	1336.61	674.456
		0.1012	8.62292	580.833	101.241	17.9447	-1.38954	1.66046	1344.31	680.246
		0.1013	2.21292	584.183	101.281	21.2947	-1.99954	3.80046	1333.31	688.186
		0.1014	-7.54708	587.233	101.436	9.70471	-2.60954	-3.21954	1331.11	680.556
		0.1015	-4.49708	597.613	101.712	18.5547	-2.30954	-5.35954	1334.51	670.486
		0.1016	-4.49708	618.063	102.119	14.2847	-5.65954	-3.82954	1342.41	674.146
		0.1017	-6.02708	612.263	102.663	13.3647	-6.87954	2.88046	1364.41	670.786
		0.1018	-3.27708	621.113	103.351	24.0447	-3.52954	-3.52954	1368.41	668.656
		0.1019	-3.88708	627.823	104.189	17.0247	3.80046	-2.60954	1377.21	678.726
		0.102	-3.27708	637.893	105.182	15.5047	-11.4595	-8.09954	1372.31	675.366
		0.1021	1.60292	654.983	106.332	14.2847	-4.43954	0.440459	1375.11	672.626
		0.1022	-4.49708	654.373	107.644	13.9747	-4.74954	-2.30954	1392.21	681.476
		0.1023	2.52292	664.143	109.12	15.8047	-1.08954	-1.08954	1382.71	666.516
		0.1024	-1.13708	662.923	110.759	13.0547	-1.69954	-5.35954	1391.01	673.236
		0.1025	-2.05708	666.583	112.562	21.6047	-9.32954	-2.91954	1401.01	676.586
		0.1026	-3.88708	668.413	114.529	19.4647	-1.69954	-1.38954	1409.01	674.456
		0.1027	0.992916	672.993	116.655	20.6847	-3.82954	-1.99954	1410.81	674.756
		0.1028	5.26292	675.433	118.939	27.0947	-11.4595	-2.91954	1412.61	677.196
		0.1029	-14.2671	669.333	121.375	17.9447	-7.18954	5.02046	1409.61	675.366
		0.103	2.52292	675.433	123.958	18.8547	3.80046	-4.74954	1405.91	669.876
		0.1031	-0.227084	673.603	126.682	27.7047	1.36046	-2.30954	1407.71	674.456
		0.1032	-2.05708	668.413	129.538	19.4647	-2.91954	0.750459	1389.71	671.396
		0.1033	0.0829157	669.333	132.52	17.6347	-3.52954	-5.35954	1389.41	681.476
		0.1034	1.60292	669.633	135.616	20.9947	3.49046	-4.74954	1395.21	684.826
		0.1035	-2.05708	656.813	138.818	30.4547	-8.09954	0.440459	1397.71	688.186
		0.1036	2.21292	664.443	142.115	31.9847	-4.74954	-1.38954	1404.11	681.476
		0.1037	1.60292	663.223	145.495	25.8747	-7.48954	2.27046	1411.41	691.546
		0.1038	-2.97708	668.113	148.946	25.5747	3.19046	-3.52954	1411.41	687.576
		0.1039	1.30292	669.943	152.457	25.5747	-2.30954	1.05046	1417.51	700.696
		0.104	-3.58708	665.053	156.014	21.9047	-5.96954	-2.60954	1417.51	684.526
		0.1041	-0.837084	667.803	159.604	27.7047	-4.74954	1.05046	1419.31	698.256
		0.1042	-1.74708	668.413	163.215	26.7947	-9.62954	-0.779541	1407.11	692.456
		0.1043	-5.41708	662.313	166.833	21.9047	-2.60954	3.80046	1425.71	694.286
		0.1044	2.21292	669.333	170.446	20.9947	-10.2395	-3.52954	1412.61	701.916
		0.1045	-2.36708	664.443	174.039	28.9247	-10.2395	-3.52954	1428.81	695.506
		0.1046	-12.4371	659.873	177.601	26.1847	-12.9895	-3.21954	1424.81	700.696
		0.1047	-6.93708	657.433	181.119	28.0147	-15.7295	-5.96954	1429.41	697.956
		0.1048	-10.5971	662.003	184.58	15.8047	-12.6795	-6.57954	1426.11	699.476
		0.1049	8.01292	661.393	187.974	24.6547	-9.62954	-0.469541	1418.11	702.836
		0.105	3.74292	673.293	191.288	23.1347	-14.8195	-3.82954	1412.31	705.576
		0.1051	3.43292	663.533	194.514	26.7947	-1.69954	-7.18954	1413.51	707.416
		0.1052	-0.527084	666.583	197.64	23.7447	-15.1195	0.140459	1412.01	713.206
		0.1053	4.65292	673.603	200.658	24.3547	-6.57954	-0.779541	1406.81	716.876
		0.1054	0.992916	672.683	203.559	25.5747	-14.5095	-1.99954	1412.01	714.736
		0.1055	0.992916	669.333	206.337	20.3847	-22.1395	8.68046	1393.71	714.736
		0.1056	-4.49708	656.813	208.984	24.6547	-9.62954	1.36046	1402.21	706.806
		0.1057	2.82292	654.983	211.495	21.9047	-10.5495	1.05046	1400.41	712.296
		0.1058	-3.58708	633.623	213.864	18.2447	-9.62954	-4.13954	1387.91	725.416
		0.1059	0.692916	643.083	216.088	22.2147	-4.43954	-4.13954	1393.41	731.516
		0.106	-5.41708	644.913	218.163	31.0647	-14.8195	-0.469541	1405.91	744.646
		0.1061	-2.05708	638.503	220.087	17.3347	-13.2895	1.36046	1399.21	733.656
		0.1062	3.43292	640.643	221.858	28.3147	-1.38954	6.24046	1390.31	733.966
		0.1063	3.43292	635.763	223.476	17.9447	-2.30954	3.19046	1405.61	727.556
		0.1064	0.0829157	641.863	224.942	22.2147	-1.69954	-4.13954	1399.21	717.486
		0.1065	6.79292	640.033	226.256	17.0247	-11.4595	-4.13954	1391.61	726.946
		0.1066	-8.76708	638.503	227.421	22.8247	-9.32954	9.90046	1385.81	741.896
		0.1067	-1.13708	639.113	228.439	27.4047	-5.35954	-3.82954	1389.11	729.076
		0.1068	-1.13708	642.473	229.316	20.0747	-4.43954	-1.38954	1387.91	718.706
		0.1069	-1.44708	637.893	230.054	20.3847	-9.32954	-5.65954	1401.01	719.616
		0.107	3.43292	643.693	230.659	12.1447	-2.91954	6.54046	1391.31	725.726
		0.1071	-1.74708	637.593	231.138	15.5047	-8.09954	-2.30954	1394.01	725.416
		0.1072	2.21292	645.523	231.496	20.9947	-2.30954	1.36046	1386.41	722.366
		0.1073	-6.63708	643.083	231.741	14.8947	-4.13954	-3.52954	1379.11	727.856
		0.1074	0.0829157	638.503	231.881	21.2947	0.140459	-0.779541	1386.71	715.346
		0.1075	11.9829	634.543	231.923	15.8047	-1.69954	2.88046	1394.91	726.336
		0.1076	6.79292	647.663	231.876	21.9047	-1.08954	-3.52954	1388.81	713.206
		0.1077	6.49292	654.373	231.748	15.8047	0.440459	6.24046	1392.21	723.886
		0.1078	2.52292	647.353	231.549	21.2947	3.80046	1.36046	1376.61	713.516
		0.1079	0.992916	659.263	231.286	13.0547	-4.74954	1.66046	1385.81	720.536
		0.108	-0.527084	648.883	230.97	23.4347	-1.69954	3.80046	1393.11	716.266
		0.1081	6.79292	656.813	230.61	18.5547	-4.43954	-0.779541	1391.01	714.736
		0.1082	3.13292	655.903	230.214	22.2147	-8.09954	-4.13954	1388.21	717.786
		0.1083	8.01292	657.433	229.791	17.6347	-1.08954	0.140459	1391.61	724.806
		0.1084	3.74292	665.663	229.35	23.4347	-10.2395	-5.35954	1391.01	723.276
		0.1085	4.04292	669.333	228.9	25.2647	-6.26954	-5.96954	1390.31	720.536
		0.1086	3.74292	663.833	228.449	20.0747	-1.69954	3.19046	1379.41	727.556
		0.1087	-3.88708	663.833	228.006	27.4047	-1.69954	0.750459	1388.21	731.216
		0.1088	1.91292	665.663	227.578	24.6547	1.05046	-0.469541	1391.91	723.276
		0.1089	-9.37708	685.813	227.173	28.0147	3.19046	-5.35954	1389.11	727.246
		0.109	4.04292	685.203	226.798	28.0147	0.750459	0.440459	1388.21	722.976
		0.1091	0.382916	695.883	226.46	20.6847	-1.38954	4.71046	1391.01	719.616
		0.1092	1.60292	710.833	226.165	15.8047	-0.169541	-7.18954	1389.41	713.516
		0.1093	6.79292	721.213	225.92	22.5247	-8.40954	1.05046	1390.71	719.926
		0.1094	5.87292	728.533	225.729	20.3847	-3.82954	1.97046	1393.41	726.026
		0.1095	4.96292	722.123	225.598	26.1847	0.750459	3.19046	1394.01	708.026
		0.1096	-4.19708	734.023	225.53	27.4047	-12.6795	-0.779541	1389.41	703.446
		0.1097	2.21292	743.793	225.529	12.7547	-3.21954	0.140459	1391.61	697.956
		0.1098	-2.05708	757.523	225.598	23.1347	-1.38954	-4.13954	1399.51	702.526
		0.1099	-2.36708	759.663	225.739	31.0647	-2.91954	0.440459	1406.51	708.636
		0.11	-10.5971	758.743	225.954	22.8247	-1.08954	-1.99954	1404.71	696.726
		0.1101	1.30292	755.693	226.245	26.7947	-7.48954	2.58046	1406.81	697.956
		0.1102	3.74292	761.183	226.61	20.6847	-3.52954	-2.30954	1415.41	702.226
		0.1103	1.30292	762.103	227.051	27.7047	-3.52954	-9.93954	1416.61	701.006
		0.1104	3.43292	763.023	227.565	27.4047	-11.4595	-3.52954	1415.11	708.326
		0.1105	-2.36708	750.813	228.15	20.9947	-8.70954	1.66046	1413.21	695.506
		0.1106	7.71292	749.593	228.804	28.9247	-18.4795	-3.21954	1417.21	701.916
		0.1107	4.65292	748.983	229.523	29.8447	-12.6795	3.49046	1415.11	698.256
		0.1108	3.43292	743.183	230.303	23.7447	-12.6795	1.97046	1415.11	698.566
		0.1109	1.60292	751.723	231.139	18.5547	-9.01954	1.05046	1411.11	700.086
		0.111	-3.58708	746.233	232.026	25.5747	-12.9895	-3.82954	1405.31	702.226
		0.1111	-2.05708	764.853	232.959	27.7047	-12.0695	-4.43954	1411.41	694.596
		0.1112	-2.66708	766.373	233.931	20.6847	-17.2595	2.58046	1409.31	695.506
		0.1113	-4.19708	779.193	234.937	23.4347	-1.38954	0.140459	1406.51	692.456
		0.1114	2.52292	765.153	235.971	30.7547	-11.7695	0.750459	1403.51	694.896
		0.1115	6.49292	769.423	237.025	28.0147	-4.74954	-4.43954	1399.21	706.186
		0.1116	-2.66708	763.323	238.093	28.0147	-1.69954	0.140459	1403.21	688.796
		0.1117	-6.93708	763.933	239.17	25.5747	-12.9895	2.27046	1398.91	697.036
		0.1118	9.54292	759.053	240.248	22.8247	-8.40954	-3.82954	1399.81	697.036
		0.1119	-1.74708	765.763	241.323	33.2047	-12.6795	0.750459	1395.51	693.376
		0.112	4.04292	763.633	242.389	40.5247	-4.74954	-1.08954	1398.91	700.086
		0.1121	-4.49708	769.423	243.44	24.6547	-12.3795	-1.99954	1391.01	696.426
		0.1122	6.79292	753.253	244.473	34.1147	-5.65954	-1.08954	1389.41	701.616
		0.1123	-12.1271	760.273	245.482	36.5547	-11.1595	-2.91954	1387.61	707.416
		0.1124	-5.10708	748.673	246.464	38.3847	-3.82954	0.140459	1391.91	705.576
		0.1125	4.65292	755.693	247.416	40.8347	0.440459	-1.99954	1382.41	702.226
		0.1126	-2.66708	751.723	248.335	36.2547	-0.469541	-9.93954	1385.21	708.936
		0.1127	0.382916	752.643	249.219	45.1047	-4.74954	-2.30954	1383.91	701.006
		0.1128	5.26292	747.153	250.066	37.7747	-4.74954	-5.65954	1380.91	694.896
		0.1129	0.0829157	745.623	250.876	38.6947	-5.96954	8.68046	1388.21	701.616
		0.113	-2.66708	739.523	251.647	39.6147	-6.57954	0.440459	1380.01	698.256
		0.1131	-6.02708	746.543	252.381	38.6947	-2.60954	-9.01954	1369.61	704.356
		0.1132	-1.44708	726.393	253.077	42.9647	-10.5495	-1.69954	1363.81	708.636
		0.1133	-2.66708	736.163	253.737	46.6247	-3.82954	-4.74954	1381.51	706.806
		0.1134	0.382916	734.333	254.363	46.0147	3.19046	-5.35954	1381.81	698.866
		0.1135	-4.80708	735.863	254.956	38.3847	-9.32954	-1.08954	1388.21	704.666
		0.1136	-2.05708	732.803	255.518	39.3047	-6.87954	3.80046	1387.61	707.106
		0.1137	4.04292	725.783	256.053	46.9347	0.140459	-6.26954	1387.01	714.126
		0.1138	3.13292	725.783	256.564	51.2047	-2.91954	-5.96954	1380.61	714.426
		0.1139	-2.05708	719.383	257.052	47.5447	-8.70954	-4.74954	1370.81	719.006
		0.114	-3.27708	724.263	257.523	44.4947	-5.04954	-1.08954	1364.71	735.796
		0.1141	2.52292	715.713	257.979	45.1047	-2.91954	1.97046	1366.51	743.426
		0.1142	5.26292	712.973	258.423	48.7647	-7.18954	5.02046	1364.11	754.106
		0.1143	-1.13708	707.173	258.858	47.2347	3.49046	-6.87954	1367.51	756.846
		0.1144	1.30292	697.103	259.289	41.4447	-2.30954	-4.43954	1373.91	760.516
		0.1145	-2.36708	697.713	259.718	45.7147	-2.60954	-3.52954	1378.81	768.446
		0.1146	4.04292	697.713	260.148	44.1847	-6.26954	4.71046	1374.51	769.666
		0.1147	-3.27708	693.133	260.582	47.2347	0.440459	-1.69954	1381.81	782.176
		0.1148	-6.02708	685.203	261.022	45.4047	-1.69954	-4.74954	1378.81	783.706
		0.1149	-0.837084	685.813	261.47	42.9647	-1.38954	-2.30954	1373.61	801.406
		0.115	2.82292	687.033	261.929	38.9947	-3.21954	-0.469541	1377.21	812.396
		0.1151	0.992916	684.593	262.401	39.6147	-4.13954	0.140459	1371.71	810.256
		0.1152	-0.837084	678.483	262.887	46.9347	-6.87954	-5.65954	1370.81	825.816
		0.1153	0.692916	681.533	263.387	38.9947	-1.69954	-5.35954	1367.51	826.126
		0.1154	0.382916	670.853	263.903	47.2347	0.140459	-0.469541	1362.01	833.756
		0.1155	-2.66708	667.803	264.436	45.4047	-14.2095	-6.57954	1351.31	835.276
		0.1156	2.82292	679.093	264.984	46.9347	-6.57954	1.97046	1343.71	837.116
		0.1157	-7.54708	683.673	265.549	49.0747	-14.5095	2.58046	1349.81	845.346
		0.1158	-5.71708	682.753	266.129	42.3547	-16.6495	0.440459	1345.51	857.866
		0.1159	-8.46708	686.113	266.724	45.1047	-9.62954	-3.52954	1358.61	856.946
		0.116	-2.66708	692.523	267.333	45.7147	-11.7695	-6.87954	1357.11	864.276
		0.1161	3.13292	697.713	267.953	51.8147	-12.6795	-1.08954	1354.31	880.756
		0.1162	1.60292	727.313	268.584	34.7247	-11.4595	-1.69954	1357.11	878.916
		0.1163	-0.837084	767.293	269.224	42.3547	-10.2395	4.10046	1352.51	885.636
		0.1164	0.382916	795.363	269.871	37.1647	-10.8495	-2.60954	1354.61	881.056
		0.1165	4.35292	803.913	270.522	52.7347	-8.09954	3.49046	1355.31	884.106
		0.1166	1.30292	820.083	271.176	38.0847	-15.4295	-3.21954	1359.51	885.326
		0.1167	-3.58708	833.213	271.831	42.0547	-4.13954	-6.26954	1347.61	894.486
		0.1168	-6.32708	838.093	272.483	40.8347	-10.2395	-2.60954	1345.81	878.306
		0.1169	6.18292	857.623	273.132	32.2847	-11.1595	-5.96954	1352.51	887.466
		0.117	-14.8771	863.683	273.774	39.9147	-12.6795	-1.38954	1347.01	886.546
		0.1171	-4.19708	883.883	274.407	41.4447	-8.70954	-10.8495	1349.51	878.006
		0.1172	-3.58708	890.883	275.028	37.4747	-8.40954	-0.469541	1356.81	889.906
		0.1173	0.382916	906.783	275.637	44.7947	-11.7695	-7.18954	1355.31	889.906
		0.1174	-0.527084	904.883	276.23	38.6947	-8.40954	-4.74954	1351.31	894.176
		0.1175	-3.88708	899.783	276.804	45.1047	1.05046	-4.13954	1348.81	898.456
		0.1176	1.60292	903.383	277.359	46.6247	-10.2395	-5.96954	1352.21	910.006
		0.1177	1.91292	913.783	277.892	48.1547	0.750459	-1.38954	1349.81	910.006
		0.1178	-5.10708	913.483	278.4	42.3547	-6.26954	-9.32954	1345.51	913.406
		0.1179	-0.837084	906.183	278.883	51.5147	-2.30954	-0.779541	1348.21	918.606
		0.118	1.60292	904.883	279.337	50.5947	-2.91954	-1.08954	1353.71	918.006
		0.1181	-2.66708	910.083	279.761	44.1847	-8.70954	-5.35954	1352.51	914.606
		0.1182	-6.02708	906.483	280.154	53.0347	-1.38954	0.750459	1351.31	913.406
		0.1183	-3.88708	913.483	280.515	44.4947	-5.04954	-4.13954	1346.71	918.306
		0.1184	-6.02708	921.383	280.842	43.2747	-4.43954	-4.43954	1342.11	913.406
		0.1185	-8.46708	923.583	281.135	39.9147	-6.26954	-1.69954	1340.61	915.506
		0.1186	-10.9071	924.783	281.392	52.4247	-6.57954	-7.18954	1332.71	919.806
		0.1187	-4.49708	926.583	281.613	48.1547	1.97046	-7.79954	1325.31	916.106
		0.1188	-13.0471	924.483	281.799	38.0847	-3.82954	-8.70954	1321.11	923.806
		0.1189	-10.2971	932.983	281.948	37.7747	-5.65954	-0.169541	1325.71	932.306
		0.119	-1.44708	928.383	282.061	47.8447	-3.82954	-2.91954	1320.81	932.306
		0.1191	-6.93708	935.783	282.139	46.9347	1.66046	-5.35954	1328.71	929.006
		0.1192	-16.3971	924.783	282.181	54.5647	-0.779541	-1.69954	1321.41	936.606
		0.1193	-7.54708	934.483	282.189	53.9547	-5.04954	-5.65954	1333.61	923.206
		0.1194	-10.5971	940.283	282.162	46.3247	-3.52954	-4.13954	1329.01	925.306
		0.1195	1.91292	935.183	282.103	45.1047	0.140459	-2.91954	1325.31	919.806
		0.1196	-2.66708	929.083	282.012	53.0347	-10.8495	-5.35954	1320.51	918.006
		0.1197	-4.49708	932.683	281.891	50.9047	-0.169541	-1.99954	1326.61	914.906
		0.1198	-1.74708	923.283	281.74	46.6247	-11.4595	0.440459	1324.41	914.606
		0.1199	-2.36708	928.083	281.56	49.9847	-5.96954	0.440459	1323.21	921.006
		0.12	-9.37708	921.383	281.354	55.1747	-3.82954	4.41046	1325.31	918.906
		0.1201	4.96292	927.183	281.122	41.1347	-8.70954	0.140459	1312.51	921.006
		0.1202	-2.05708	929.383	280.865	49.0747	-2.91954	-0.469541	1319.21	914.006
		0.1203	-0.227084	939.683	280.584	41.7447	-2.30954	-4.74954	1316.21	908.206
		0.1204	-3.27708	934.783	280.281	48.4647	-3.52954	-7.48954	1324.41	915.806
		0.1205	-7.54708	931.483	279.956	50.9047	-4.43954	-2.91954	1332.71	928.406
		0.1206	-7.54708	921.683	279.611	46.9347	-6.57954	-1.99954	1331.11	936.906
		0.1207	-9.68708	933.583	279.245	49.9847	1.97046	-6.26954	1336.91	945.406
		0.1208	-3.58708	934.783	278.86	55.1747	5.63046	-3.82954	1346.41	965.606
		0.1209	-5.71708	933.283	278.455	43.2747	-4.13954	4.41046	1331.81	957.306
		0.121	-6.93708	939.083	278.032	48.7647	-0.779541	0.750459	1331.41	966.806
		0.1211	-3.58708	930.583	277.591	48.4647	-0.779541	-5.04954	1325.71	967.406
		0.1212	-3.27708	934.483	277.132	54.8647	-6.87954	-0.169541	1327.81	980.206
		0.1213	-2.66708	931.483	276.657	51.8147	0.440459	-4.43954	1328.71	977.506
		0.1214	-8.76708	918.683	276.165	56.0847	0.750459	-11.4595	1324.11	968.906
		0.1215	-3.88708	924.783	275.658	45.7147	-7.18954	6.24046	1317.11	967.406
		0.1216	-7.24708	930.583	275.136	50.9047	8.38046	13.5605	1318.91	978.706
		0.1217	-8.76708	928.683	274.6	51.2047	-3.21954	-1.38954	1317.11	980.206
		0.1218	-11.8271	918.683	274.051	46.3247	-0.779541	-0.779541	1320.21	981.506
		0.1219	5.26292	924.783	273.491	46.3247	-2.91954	-2.30954	1319.91	975.306
		0.122	-3.27708	909.483	272.92	52.1247	2.88046	0.140459	1329.91	982.706
		0.1221	7.71292	918.683	272.342	43.8847	-7.48954	-6.87954	1324.41	976.906
		0.1222	-0.837084	912.583	271.756	57.3147	-0.779541	-1.69954	1322.01	973.206
		0.1223	-7.54708	926.283	271.166	47.2347	-2.91954	1.97046	1322.91	968.006
		0.1224	-5.71708	915.583	270.574	55.7847	3.19046	-1.08954	1326.91	966.806
		0.1225	-1.44708	920.183	269.982	52.7347	-10.2395	5.32046	1332.11	964.106
		0.1226	-8.46708	910.383	269.392	54.2547	1.66046	-0.169541	1329.31	969.606
		0.1227	-1.44708	915.283	268.807	50.9047	-6.57954	-7.48954	1343.41	963.106
		0.1228	0.0829157	909.183	268.23	52.1247	4.71046	5.02046	1357.71	968.606
		0.1229	-6.63708	901.583	267.664	50.2947	-1.99954	-3.21954	1340.01	975.006
		0.123	-4.49708	898.483	267.111	55.7847	9.60046	1.36046	1354.01	971.706
		0.1231	-8.76708	912.583	266.575	49.6847	2.27046	-5.35954	1350.71	974.406
		0.1232	-0.227084	909.783	266.06	60.3647	-6.26954	-7.48954	1351.01	969.606
		0.1233	-8.15708	907.683	265.567	43.8847	3.49046	-1.69954	1351.31	975.306
		0.1234	-6.93708	901.283	265.101	46.9347	-0.779541	12.0405	1342.71	986.006
		0.1235	-2.97708	906.783	264.665	52.4247	5.02046	-3.52954	1334.81	989.106
		0.1236	-9.37708	892.983	264.261	51.2047	-0.779541	-0.169541	1333.01	994.906
		0.1237	-6.32708	899.083	263.892	49.6847	2.58046	-2.91954	1339.71	989.406
		0.1238	-12.4371	899.783	263.562	58.8347	-4.43954	1.05046	1334.21	1001.91
		0.1239	-0.527084	903.083	263.272	47.8447	-1.69954	-2.60954	1332.71	1001.01
		0.124	5.26292	888.483	263.025	48.1547	2.27046	0.750459	1341.21	998.206
		0.1241	-7.54708	894.883	262.823	58.8347	-1.38954	4.10046	1330.81	1000.71
		0.1242	-5.10708	897.583	262.668	55.4747	2.27046	-4.13954	1338.81	1008.01
		0.1243	-3.27708	901.283	262.561	60.9747	1.05046	-1.08954	1338.81	1003.11
		0.1244	-9.07708	894.583	262.503	56.3947	2.88046	-7.48954	1343.01	1011.41
		0.1245	-2.36708	902.183	262.495	59.1447	1.36046	2.58046	1344.61	999.506
		0.1246	-6.63708	906.483	262.538	49.3747	-1.38954	-6.26954	1346.71	981.806
		0.1247	-0.527084	903.683	262.632	51.5147	-0.469541	-8.40954	1343.01	994.606
		0.1248	-5.71708	905.583	262.776	59.7547	12.3405	-3.21954	1335.41	991.206
		0.1249	-2.36708	914.383	262.97	56.0847	-7.48954	-6.26954	1339.41	985.706
		0.125	-3.27708	915.583	263.214	58.8347	-3.82954	0.750459	1338.81	992.706
		0.1251	0.382916	915.283	263.506	56.0847	-5.96954	-1.99954	1335.71	980.506
		0.1252	-9.98708	916.783	263.845	60.3647	-0.169541	-8.09954	1335.11	982.406
		0.1253	-10.5971	917.483	264.23	60.9747	1.36046	-2.60954	1333.01	988.806
		0.1254	-0.227084	913.183	264.658	53.0347	-3.21954	-4.74954	1329.61	988.806
		0.1255	-12.1271	913.183	265.128	64.9347	-5.96954	-1.08954	1329.01	995.806
		0.1256	-4.19708	905.583	265.638	58.5347	1.97046	-2.30954	1334.21	1002.81
		0.1257	-1.13708	909.783	266.183	57.6147	-7.18954	-5.65954	1324.71	993.106
		0.1258	-7.85708	910.083	266.763	56.0847	-5.04954	2.27046	1332.71	999.206
		0.1259	-5.10708	916.483	267.373	63.1047	-5.96954	-5.35954	1326.91	999.806
		0.126	-2.05708	915.283	268.01	56.3947	-10.8495	1.66046	1325.01	987.906
		0.1261	-1.44708	910.083	268.671	51.8147	-6.57954	2.58046	1321.11	995.806
		0.1262	0.382916	910.983	269.352	57.6147	-6.87954	-0.469541	1324.11	987.306
		0.1263	1.30292	903.083	270.05	56.3947	-11.7695	5.02046	1327.21	998.206
		0.1264	-4.19708	895.483	270.761	47.8447	-5.65954	-3.82954	1317.71	997.306
		0.1265	-5.41708	896.383	271.481	44.1847	-11.4595	-2.91954	1312.21	998.506
		0.1266	-2.97708	891.183	272.207	64.9347	-8.70954	-3.21954	1315.61	998.506
		0.1267	-7.85708	896.383	272.935	53.6447	-6.57954	1.97046	1317.71	1008.31
		0.1268	-0.527084	886.883	273.662	53.0347	-3.82954	-5.35954	1313.71	1005.61
		0.1269	2.21292	885.083	274.383	57.3147	-2.60954	7.76046	1318.31	1012.31
		0.127	-4.80708	879.283	275.097	58.2247	-7.48954	5.63046	1310.41	1009.81
		0.1271	-3.88708	878.383	275.799	50.5947	-5.35954	3.80046	1314.11	1018.71
		0.1272	-6.32708	880.483	276.486	57.6147	-4.13954	-1.38954	1317.41	1017.51
		0.1273	-6.93708	864.683	277.156	48.1547	-4.13954	4.10046	1310.41	1023.61
		0.1274	-2.97708	866.483	277.806	53.3447	-1.69954	8.68046	1308.01	1022.31
		0.1275	-5.41708	863.083	278.434	48.7647	1.05046	-3.21954	1311.31	1016.51
		0.1276	-3.58708	862.783	279.038	49.9847	-12.3795	4.41046	1311.61	1020.51
		0.1277	-1.74708	879.883	279.615	49.3747	-3.82954	-3.21954	1303.71	1019.91
		0.1278	-2.66708	888.483	280.165	48.7647	-1.08954	3.19046	1315.91	1013.81
		0.1279	2.82292	887.183	280.687	48.4647	-3.52954	0.750459	1308.01	1000.11
		0.128	-3.27708	891.483	281.18	53.9547	-0.469541	4.41046	1306.71	1003.41
		0.1281	-4.19708	873.183	281.645	54.5647	-5.04954	3.19046	1314.41	1001.01
		0.1282	-3.27708	874.083	282.08	50.5947	-5.96954	4.10046	1315.01	993.706
		0.1283	-2.97708	878.083	282.488	44.4947	2.58046	-0.169541	1307.31	1014.41
		0.1284	-7.54708	876.583	282.869	49.9847	-2.91954	-1.99954	1310.71	1008.01
		0.1285	-6.63708	872.883	283.224	55.4747	-3.52954	-6.57954	1307.01	1009.21
		0.1286	-6.63708	864.683	283.557	44.7947	1.97046	5.02046	1312.21	1006.21
		0.1287	-1.74708	871.983	283.868	50.9047	-5.96954	-5.65954	1317.71	1021.41
		0.1288	-8.76708	876.583	284.161	49.6847	-8.70954	6.54046	1321.11	1023.31
		0.1289	-6.93708	872.283	284.438	48.4647	-1.08954	1.66046	1324.71	1020.21
		0.129	-4.49708	874.383	284.703	45.1047	-5.96954	-9.01954	1320.81	1013.81
		0.1291	-14.5671	875.283	284.958	49.9847	-4.43954	-1.08954	1311.31	1015.91
		0.1292	-2.66708	882.683	285.206	54.5647	-6.26954	1.05046	1314.71	1007.71
		0.1293	-0.837084	885.983	285.45	47.8447	-0.169541	2.88046	1310.71	1002.81
		0.1294	7.40292	885.383	285.694	55.4747	-3.21954	-0.169541	1321.41	1011.11
		0.1295	5.57292	890.583	285.94	50.5947	-6.87954	-1.38954	1322.31	1016.91
		0.1296	11.3729	897.883	286.191	47.5447	-7.79954	-2.60954	1321.11	1009.51
		0.1297	-1.44708	903.083	286.448	51.2047	2.27046	1.66046	1321.11	1016.51
		0.1298	-4.19708	892.683	286.715	48.7647	-6.26954	-1.99954	1331.81	1026.01
		0.1299	-11.5171	897.583	286.993	54.5647	5.63046	-3.21954	1330.81	1019.91
		0.13	-11.2171	888.183	287.284	52.1247	-1.38954	-1.99954	1328.11	1022.71
		0.1301	4.65292	902.483	287.588	54.5647	-4.74954	2.88046	1330.51	1030.31
		0.1302	-10.9071	903.983	287.909	60.0547	-4.74954	-0.469541	1324.71	1024.81
		0.1303	5.57292	907.383	288.245	67.6847	1.05046	5.32046	1324.41	1022.71
		0.1304	-2.66708	929.683	288.599	63.7147	0.440459	3.80046	1329.01	1016.51
		0.1305	-4.49708	960.783	288.97	63.1047	12.9505	3.49046	1330.81	1015.31
		0.1306	-4.80708	959.883	289.358	66.4647	10.2105	6.54046	1329.31	1020.81
		0.1307	-2.66708	965.383	289.764	64.3247	1.66046	3.49046	1325.01	1016.91
		0.1308	-0.227084	970.883	290.186	67.0747	-0.469541	5.63046	1329.31	1013.51
		0.1309	5.26292	964.083	290.623	73.1747	3.19046	2.88046	1325.01	1008.61
		0.131	-9.37708	979.983	291.074	74.7047	0.750459	4.10046	1324.71	1015.31
		0.1311	1.91292	981.783	291.539	70.4347	4.71046	-1.38954	1333.01	1014.11
		0.1312	2.52292	983.383	292.014	69.2147	2.27046	8.38046	1340.61	1017.81
		0.1313	-8.76708	970.883	292.499	79.8947	-4.43954	3.80046	1329.61	1019.91
		0.1314	-6.63708	991.883	292.991	77.4547	-7.79954	1.97046	1346.41	1016.21
		0.1315	-7.24708	980.583	293.489	74.4047	-3.21954	-7.48954	1336.91	1020.21
		0.1316	-5.41708	984.283	293.99	82.6347	-0.779541	-13.2895	1342.41	1021.41
		0.1317	7.40292	991.583	294.493	82.3347	-2.30954	6.24046	1336.61	1009.81
		0.1318	-4.19708	997.683	294.995	85.0847	2.58046	5.32046	1344.01	1014.71
		0.1319	-3.27708	1005.28	295.496	85.3847	-6.26954	8.38046	1340.31	1013.81
		0.132	4.96292	1014.18	295.994	78.0647	-7.79954	0.750459	1351.31	1019.31
		0.1321	-7.54708	1016.58	296.487	87.5247	-5.35954	8.68046	1329.31	1011.71
		0.1322	-4.80708	1017.58	296.975	86.6047	3.80046	3.80046	1335.41	1018.11
		0.1323	5.87292	1032.18	297.456	83.2547	-6.87954	6.85046	1325.31	1013.51
		0.1324	-4.80708	1016.28	297.931	83.8647	-11.1595	2.27046	1324.41	1015.01
		0.1325	-9.37708	1019.38	298.399	86.9147	-9.01954	4.41046	1330.81	1014.71
		0.1326	-11.2171	1016.88	298.86	86.3047	-16.0395	2.88046	1326.91	1015.31
		0.1327	-9.98708	1022.08	299.313	85.9947	-9.93954	0.440459	1328.41	1013.51
		0.1328	-2.66708	1007.48	299.76	84.7747	-6.87954	8.99046	1327.21	1020.81
		0.1329	-4.19708	1013.88	300.2	85.0847	-8.09954	9.90046	1326.91	1008.61
		0.133	0.0829157	1008.68	300.633	82.9447	-21.2295	3.49046	1330.21	1004.01
		0.1331	3.13292	1003.48	301.061	84.4747	-20.3095	9.60046	1329.91	1018.71
		0.1332	-1.74708	1010.48	301.483	87.8247	-8.09954	1.66046	1326.91	1016.91
		0.1333	-4.49708	999.483	301.9	83.2547	-14.8195	1.36046	1325.01	1015.61
		0.1334	2.52292	1010.78	302.313	82.9447	-4.13954	-2.30954	1328.71	1009.81
		0.1335	-1.13708	998.283	302.722	78.9747	-3.82954	9.60046	1329.61	1026.61
		0.1336	-12.7371	1000.18	303.127	82.9447	-7.18954	-2.91954	1325.71	1022.01
		0.1337	-7.54708	994.983	303.528	79.8947	-6.26954	7.76046	1331.81	1024.81
		0.1338	-0.527084	995.283	303.925	76.2347	-6.57954	4.41046	1323.81	1026.91
		0.1339	-0.227084	990.383	304.318	78.0647	-6.87954	4.71046	1321.11	1019.31
		0.134	-3.27708	979.683	304.706	76.8447	-4.13954	-0.169541	1329.91	1021.41
		0.1341	-6.63708	983.083	305.087	79.2847	-6.57954	10.8205	1326.61	1019.31
		0.1342	2.21292	972.083	305.461	79.8947	-5.65954	7.15046	1325.01	1014.11
		0.1343	4.04292	975.383	305.826	82.0247	-3.21954	0.440459	1323.21	1014.11
		0.1344	-1.13708	969.583	306.179	82.0247	-1.69954	5.02046	1321.41	1015.01
		0.1345	-0.837084	973.583	306.518	81.1147	-5.65954	7.15046	1317.71	1034.21
		0.1346	-2.66708	963.183	306.841	86.3047	-3.21954	6.54046	1319.51	1026.91
		0.1347	-8.46708	968.983	307.144	83.5547	-3.52954	5.32046	1327.21	1043.41
		0.1348	0.382916	964.083	307.424	77.7547	-3.82954	9.60046	1317.11	1048.61
		0.1349	0.382916	972.683	307.677	71.9547	-12.9895	-1.38954	1315.61	1058.11
		0.135	-2.36708	965.383	307.901	80.5047	-8.09954	7.15046	1317.41	1070.61
		0.1351	-8.76708	969.583	308.09	78.3647	-0.469541	7.46046	1313.11	1076.11
		0.1352	-3.58708	961.983	308.242	75.0147	-9.62954	1.66046	1318.31	1064.51
		0.1353	-2.66708	962.583	308.352	77.4547	-5.04954	12.0405	1320.81	1063.51
		0.1354	-7.85708	955.883	308.417	78.6747	-12.9895	12.9505	1321.11	1065.71
		0.1355	1.30292	954.083	308.432	75.9247	-4.13954	11.7305	1314.11	1078.21
		0.1356	0.692916	957.083	308.395	72.8747	-7.79954	1.97046	1303.11	1075.11
		0.1357	-11.5171	950.383	308.301	69.8247	1.05046	0.140459	1306.11	1075.41
		0.1358	3.13292	956.783	308.148	75.9247	-6.57954	0.440459	1312.51	1079.41
		0.1359	-4.80708	944.583	307.934	80.1947	-4.13954	3.49046	1310.71	1083.11
		0.136	-4.19708	951.583	307.655	79.2847	-5.04954	7.46046	1319.21	1086.11
		0.1361	0.382916	961.383	307.31	71.6547	-2.60954	6.54046	1312.21	1102.91
		0.1362	-10.9071	944.283	306.898	82.0247	-2.91954	1.97046	1312.21	1115.71
		0.1363	-6.32708	940.283	306.418	84.4747	-15.1195	6.24046	1304.31	1121.81
		0.1364	1.30292	941.583	305.868	91.7947	-4.43954	4.71046	1309.81	1148.41
		0.1365	-0.527084	940.283	305.251	86.3047	-8.40954	10.2105	1306.71	1145.61
		0.1366	-0.527084	943.083	304.565	93.0147	-7.18954	9.60046	1296.71	1157.81
		0.1367	1.30292	926.283	303.813	96.3747	-2.60954	9.90046	1301.51	1157.81
		0.1368	-5.71708	923.583	302.995	96.0647	-8.70954	1.97046	1300.01	1163.31
		0.1369	-1.74708	921.383	302.115	90.2647	-15.7295	0.750459	1301.51	1185.01
		0.137	-8.46708	917.483	301.175	87.8247	-5.65954	3.19046	1300.01	1172.21
		0.1371	-1.13708	915.583	300.179	91.4847	-8.70954	0.750459	1297.01	1180.11
		0.1372	-1.13708	914.083	299.13	98.2047	-7.18954	2.58046	1291.81	1185.61
		0.1373	6.79292	916.483	298.032	90.2647	-5.96954	0.140459	1300.61	1186.51
		0.1374	-4.80708	927.483	296.892	95.1547	-6.57954	3.80046	1283.21	1198.11
		0.1375	-4.49708	925.083	295.714	91.7947	-13.2895	-0.469541	1283.81	1193.21
		0.1376	-8.46708	921.383	294.505	97.2847	-4.43954	5.32046	1288.71	1205.51
		0.1377	5.87292	918.983	293.27	92.1047	-10.8495	3.80046	1282.61	1196.91
		0.1378	-6.02708	920.783	292.018	87.2147	-3.21954	-2.91954	1282.31	1212.51
		0.1379	-13.9571	914.983	290.754	94.8447	-8.09954	-0.469541	1282.61	1207.31
		0.138	-8.15708	919.283	289.487	96.3747	-1.99954	1.66046	1291.81	1213.41
		0.1381	-3.58708	927.183	288.223	90.2647	-12.9895	-0.169541	1279.91	1213.71
		0.1382	-5.41708	922.283	286.971	91.7947	-5.35954	1.97046	1286.01	1207.01
		0.1383	4.65292	914.383	285.738	95.1547	-3.21954	4.10046	1279.31	1204.21
		0.1384	-9.98708	915.583	284.531	88.4347	-12.3795	1.97046	1274.41	1209.71
		0.1385	2.52292	906.483	283.358	100.645	-5.04954	4.41046	1271.61	1203.61
		0.1386	-5.71708	909.483	282.227	99.1147	-5.35954	-1.08954	1269.21	1219.21
		0.1387	-7.85708	903.083	281.144	99.7247	-14.2095	-4.13954	1262.81	1217.01
		0.1388	-8.76708	903.683	280.118	103.695	-12.3795	4.10046	1278.31	1214.31
		0.1389	-4.19708	900.683	279.153	94.5447	-5.35954	12.6505	1273.51	1214.91
		0.139	-2.66708	897.583	278.257	98.8147	-14.8195	3.19046	1267.71	1212.51
		0.1391	-6.93708	906.483	277.436	90.5747	-24.2795	-1.38954	1266.41	1204.51
		0.1392	-8.76708	907.683	276.694	102.175	-13.8995	-5.96954	1265.51	1199.31
		0.1393	-3.88708	901.583	276.037	99.1147	-15.1195	-2.30954	1252.11	1207.31
		0.1394	-14.2671	911.983	275.469	106.135	-9.93954	4.71046	1256.71	1193.21
		0.1395	-11.8271	910.083	274.993	108.885	-15.4295	3.80046	1255.51	1194.51
		0.1396	-15.1771	916.483	274.612	101.865	-16.9495	5.02046	1243.91	1191.41
		0.1397	-7.24708	918.383	274.329	94.5447	-15.1195	-3.82954	1241.41	1185.31
		0.1398	-10.2971	915.283	274.146	110.415	-12.6795	7.76046	1248.41	1181.31
		0.1399	-18.2271	921.083	274.063	103.085	-9.93954	-4.13954	1251.51	1183.81
		0.14	-8.46708	921.683	274.082	106.135	-11.4595	1.66046	1249.71	1174.01
		0.1401	-17.6171	926.583	274.202	102.785	-18.7895	0.750459	1264.91	1175.91
		0.1402	-10.9071	935.783	274.422	105.525	-9.32954	3.19046	1267.41	1174.31
		0.1403	-5.10708	936.983	274.742	101.565	-12.6795	1.97046	1271.31	1182.01
		0.1404	-8.76708	951.583	275.158	106.445	-8.40954	5.93046	1286.91	1181.31
		0.1405	-3.88708	956.183	275.669	105.525	-10.2395	7.76046	1279.31	1178.01
		0.1406	-9.07708	961.083	276.271	100.335	-1.99954	-0.169541	1280.51	1172.21
		0.1407	-3.27708	972.683	276.959	102.785	-0.169541	11.4305	1279.01	1181.31
		0.1408	-3.58708	972.683	277.73	100.645	-5.96954	7.46046	1289.61	1175.51
		0.1409	-7.85708	985.783	278.579	96.3747	-7.48954	-3.82954	1276.81	1184.41
		0.141	-11.8271	993.383	279.498	105.525	-3.52954	-0.169541	1283.51	1181.61
		0.1411	-3.58708	1002.28	280.483	97.8947	-4.13954	3.49046	1277.71	1174.31
		0.1412	-5.71708	1009.88	281.527	93.9347	-4.43954	4.41046	1282.61	1176.51
		0.1413	-4.19708	1008.68	282.621	98.5047	-7.48954	-2.60954	1281.71	1174.61
		0.1414	0.692916	1011.08	283.76	105.835	-3.21954	10.5105	1282.01	1167.91
		0.1415	-10.9071	1008.38	284.933	104.005	-0.469541	1.66046	1282.01	1176.21
		0.1416	-3.58708	1007.78	286.134	104.005	-1.69954	6.85046	1275.61	1176.81
		0.1417	-0.837084	1019.98	287.354	110.715	-11.7695	3.80046	1279.91	1188.71
		0.1418	-6.63708	1019.68	288.584	112.855	8.07046	-2.60954	1271.61	1183.81
		0.1419	-6.32708	1025.48	289.815	107.665	-2.30954	5.02046	1265.21	1171.31
		0.142	-1.74708	1033.68	291.038	104.005	-6.26954	1.66046	1266.11	1172.51
		0.1421	-10.9071	1037.68	292.245	100.035	-5.96954	-0.779541	1277.41	1183.81
		0.1422	-6.93708	1047.48	293.427	112.245	-3.82954	0.440459	1279.31	1184.71
		0.1423	-12.1271	1052.98	294.574	108.885	-9.93954	-0.779541	1271.31	1190.51
		0.1424	-15.7871	1048.08	295.679	110.715	-7.48954	-0.779541	1277.11	1202.41
		0.1425	2.82292	1033.38	296.734	101.865	-1.38954	-4.74954	1294.81	1208.81
		0.1426	-3.27708	1041.68	297.729	113.765	0.440459	1.97046	1302.81	1214.31
		0.1427	-13.0471	1055.68	298.659	107.965	-6.87954	-7.48954	1295.41	1219.21
		0.1428	-9.07708	1046.18	299.517	105.525	-7.18954	-0.169541	1289.31	1225.91
		0.1429	-12.1271	1057.48	300.295	107.665	-11.7695	-2.30954	1292.11	1217.71
		0.143	0.992916	1047.18	300.989	105.835	-5.04954	3.49046	1288.71	1224.71
		0.1431	-6.02708	1054.78	301.594	106.745	-0.169541	5.63046	1296.71	1221.01
		0.1432	-6.93708	1053.28	302.106	103.395	-11.7695	4.10046	1299.71	1220.71
		0.1433	-11.2171	1064.48	302.522	110.415	-11.1595	5.02046	1299.11	1208.81
		0.1434	-9.07708	1055.38	302.84	109.495	-1.99954	-3.52954	1293.31	1218.61
		0.1435	-5.41708	1063.88	303.057	107.055	-1.69954	1.97046	1297.31	1217.01
		0.1436	-14.2671	1049.58	303.175	107.355	-7.48954	1.05046	1295.41	1210.01
		0.1437	-8.76708	1056.28	303.193	112.545	-6.87954	-5.65954	1292.41	1215.81
		0.1438	-15.1771	1059.38	303.113	112.245	-6.87954	-0.169541	1296.41	1198.71
		0.1439	-7.24708	1052.98	302.937	113.765	-3.82954	-5.65954	1289.31	1210.31
		0.144	-8.15708	1055.08	302.668	117.125	-0.169541	-1.99954	1286.01	1203.01
		0.1441	-11.2171	1047.48	302.309	117.425	-2.91954	3.49046	1293.91	1206.11
		0.1442	-6.32708	1051.98	301.866	118.655	-6.57954	2.58046	1292.11	1215.81
		0.1443	-7.24708	1056.58	301.344	116.515	-13.2895	-1.08954	1298.21	1219.81
		0.1444	-4.19708	1048.38	300.75	115.295	-5.96954	-2.60954	1292.41	1230.51
		0.1445	-8.76708	1053.58	300.089	112.855	-7.79954	-3.52954	1294.21	1224.71
		0.1446	-3.58708	1042.58	299.37	117.735	-0.469541	-4.74954	1290.61	1226.81
		0.1447	-12.4371	1044.98	298.6	116.815	-9.93954	2.58046	1297.01	1216.41
		0.1448	-6.02708	1053.88	297.788	121.705	-8.70954	4.41046	1295.71	1223.21
		0.1449	-7.54708	1064.18	296.942	117.425	-5.96954	0.140459	1291.51	1214.91
		0.145	-8.76708	1045.88	296.072	113.155	-6.26954	-4.13954	1286.61	1213.11
		0.1451	-4.80708	1042.88	295.186	112.545	-1.38954	-0.469541	1280.51	1214.31
		0.1452	-8.76708	1035.28	294.295	114.075	1.05046	-2.30954	1277.11	1214.01
		0.1453	-7.54708	1034.28	293.407	118.345	-6.26954	-1.08954	1279.01	1205.51
		0.1454	-10.5971	1040.38	292.532	108.575	-7.48954	-0.169541	1276.21	1213.41
		0.1455	-9.07708	1026.38	291.678	111.635	-7.18954	-3.82954	1284.81	1212.51
		0.1456	-9.68708	1026.38	290.856	116.515	-6.87954	2.27046	1280.21	1219.21
		0.1457	-0.837084	1033.38	290.072	115.595	-0.779541	-0.469541	1279.61	1215.21
		0.1458	-1.13708	1022.98	289.336	111.025	-2.91954	-7.48954	1284.11	1220.71
		0.1459	-7.54708	1022.98	288.655	112.855	-9.32954	0.140459	1289.61	1211.31
		0.146	-6.02708	1031.88	288.036	118.655	-6.26954	-6.57954	1284.81	1215.81
		0.1461	-7.85708	1033.08	287.486	111.325	-8.70954	-0.779541	1284.81	1219.51
		0.1462	-11.2171	1039.18	287.01	116.815	-6.57954	-6.57954	1288.41	1227.71
		0.1463	-2.97708	1031.88	286.613	111.025	-10.5495	-4.13954	1286.91	1224.11
		0.1464	-18.2271	1034.88	286.3	122.615	-6.87954	-0.169541	1287.21	1213.71
		0.1465	-6.93708	1028.78	286.073	121.395	-9.01954	3.19046	1272.51	1214.91
		0.1466	-2.66708	1033.98	285.935	117.125	-10.5495	-6.87954	1280.21	1221.01
		0.1467	-9.68708	1036.48	285.888	119.565	-4.13954	-5.96954	1279.61	1224.41
		0.1468	-14.8771	1033.98	285.932	105.525	-5.65954	-9.62954	1278.31	1237.81
		0.1469	-9.98708	1049.28	286.067	112.855	-4.13954	-11.1595	1275.61	1227.71
		0.147	-9.37708	1042.58	286.291	116.815	-10.8495	4.71046	1265.21	1225.61
		0.1471	-15.4871	1040.68	286.604	108.275	-6.57954	-10.2395	1261.91	1234.41
		0.1472	-12.1271	1036.78	287.002	112.545	-10.8495	-4.74954	1264.01	1248.21
		0.1473	-9.37708	1044.38	287.483	123.835	-7.48954	0.440459	1268.01	1268.31
		0.1474	-13.3471	1050.18	288.043	117.125	-6.26954	3.19046	1264.91	1269.51
		0.1475	-19.4471	1051.98	288.678	121.395	2.27046	3.19046	1273.51	1264.71
		0.1476	-11.8271	1055.98	289.383	129.635	-3.21954	-0.779541	1263.71	1275.01
		0.1477	-9.07708	1062.08	290.153	122.005	-7.48954	-2.91954	1258.21	1281.71
		0.1478	-16.3971	1074.58	290.983	130.855	-3.21954	5.02046	1263.11	1280.21
		0.1479	-11.8271	1084.08	291.868	131.165	-13.5995	-5.96954	1266.81	1274.41
		0.148	-13.9571	1085.58	292.801	126.895	-19.0895	-7.48954	1268.31	1288.81
		0.1481	-9.07708	1085.58	293.776	132.075	-6.87954	5.02046	1270.41	1290.91
		0.1482	-9.98708	1094.48	294.789	121.705	-15.7295	2.27046	1262.81	1288.81
		0.1483	-7.24708	1091.38	295.832	139.705	-13.8995	-11.4595	1267.11	1288.51
		0.1484	-12.7371	1101.18	296.899	133.295	-15.4295	-2.91954	1265.81	1292.41
		0.1485	-10.5971	1095.08	297.984	138.185	-19.0895	1.66046	1265.21	1285.11
		0.1486	-14.5671	1101.18	299.081	128.115	-15.7295	-0.469541	1264.31	1288.81
		0.1487	-2.05708	1104.78	300.184	140.315	-14.2095	-0.169541	1263.41	1286.61
		0.1488	-13.3471	1094.48	301.287	138.185	-19.0895	-1.69954	1253.91	1285.41
		0.1489	-7.54708	1098.08	302.385	130.555	-9.62954	-1.69954	1255.21	1288.81
		0.149	-14.5671	1102.08	303.471	130.555	-10.8495	-0.469541	1256.41	1279.91
		0.1491	-15.1771	1104.48	304.541	136.355	-12.9895	0.440459	1257.01	1275.01
		0.1492	-10.5971	1105.38	305.589	132.995	-16.9495	-2.30954	1255.81	1279.31
		0.1493	-13.3471	1095.98	306.612	143.675	-9.93954	-1.08954	1247.51	1276.61
		0.1494	-8.15708	1097.18	307.606	140.015	-16.3395	2.58046	1250.61	1271.41
		0.1495	-13.9571	1093.78	308.567	137.265	-13.8995	-7.48954	1253.01	1274.41
		0.1496	-21.5871	1087.38	309.493	129.635	-10.2395	1.05046	1251.21	1275.31
		0.1497	-13.0471	1086.48	310.38	138.485	-5.96954	3.49046	1250.31	1261.61
		0.1498	-10.9071	1084.98	311.227	137.875	-9.32954	-1.69954	1246.01	1268.31
		0.1499	-10.5971	1081.28	312.032	132.075	-12.3795	-1.38954	1241.11	1269.51
		0.15	-13.6571	1081.28	312.794	135.745	-12.9895	-3.21954	1241.11	1259.81
		0.1501	-13.9571	1081.88	313.512	135.135	-5.35954	-7.18954	1235.01	1259.21
		0.1502	-8.46708	1085.58	314.185	136.655	-5.65954	15.3905	1240.51	1255.81
		0.1503	2.21292	1078.28	314.813	133.605	-12.3795	0.750459	1229.21	1250.91
		0.1504	-17.9271	1078.28	315.396	135.135	-5.65954	1.36046	1232.61	1252.41
		0.1505	-14.8771	1070.28	315.935	137.265	-9.01954	-1.99954	1237.51	1251.81
		0.1506	-12.4371	1087.08	316.429	133.605	-6.26954	-3.21954	1238.41	1249.11
		0.1507	-12.7371	1091.08	316.881	140.925	-2.30954	1.97046	1246.61	1254.31
		0.1508	-15.4871	1087.68	317.29	146.425	-8.09954	-2.30954	1239.01	1246.71
		0.1509	-14.2671	1088.68	317.658	134.515	-7.79954	0.750459	1239.61	1249.11
		0.151	-16.7071	1090.78	317.985	141.235	-6.57954	-3.52954	1224.91	1242.41
		0.1511	-9.98708	1085.28	318.274	150.695	-6.57954	-0.779541	1225.21	1241.51
		0.1512	-5.41708	1078.88	318.526	147.335	-5.65954	1.66046	1229.21	1252.81
		0.1513	-21.5871	1071.28	318.741	147.035	-10.8495	1.05046	1225.91	1250.61
		0.1514	-9.68708	1086.18	318.922	154.965	-3.82954	1.66046	1221.01	1251.81
		0.1515	-16.0971	1089.28	319.069	154.055	-2.60954	2.27046	1233.21	1259.51
		0.1516	-18.2271	1086.48	319.185	152.215	-5.96954	-0.469541	1227.41	1259.51
		0.1517	-16.7071	1084.08	319.27	154.965	-7.18954	-4.74954	1230.71	1259.21
		0.1518	-20.0671	1075.48	319.326	166.255	-4.13954	-6.26954	1217.61	1260.41
		0.1519	-17.0071	1071.28	319.355	156.795	-2.91954	-8.40954	1217.31	1247.01
		0.152	-19.7571	1075.18	319.357	159.235	-5.96954	-12.0695	1216.11	1262.81
		0.1521	-12.7371	1073.68	319.336	165.645	-9.62954	-8.40954	1215.21	1259.51
		0.1522	-14.2671	1071.58	319.291	165.345	-6.57954	4.41046	1206.01	1269.81
		0.1523	-19.1471	1059.68	319.226	169.925	1.05046	-8.70954	1212.71	1260.41
		0.1524	-10.9071	1062.98	319.141	169.925	-7.79954	-0.779541	1206.01	1265.31
		0.1525	-18.2271	1056.58	319.039	174.195	-5.35954	-2.60954	1210.31	1261.91
		0.1526	-5.71708	1059.08	318.921	183.045	-3.52954	-1.38954	1210.31	1261.61
		0.1527	-10.9071	1054.18	318.79	181.825	-7.48954	-4.43954	1209.71	1278.71
		0.1528	-4.49708	1051.68	318.647	183.655	-13.2895	-3.21954	1206.61	1281.11
		0.1529	-13.0471	1040.08	318.495	180.605	-6.26954	0.140459	1201.41	1284.21
		0.153	-12.1271	1035.58	318.335	187.005	0.750459	-11.1595	1203.31	1285.71
		0.1531	-9.98708	1056.28	318.171	184.565	-5.04954	-11.7695	1209.11	1288.51
		0.1532	-18.8371	1041.38	318.005	180.295	-7.79954	-5.04954	1211.51	1287.81
		0.1533	-1.44708	1043.78	317.838	181.515	-4.74954	0.440459	1208.51	1286.01
		0.1534	-8.15708	1043.78	317.674	183.045	-10.8495	-4.74954	1203.61	1279.91
		0.1535	-15.7871	1044.68	317.515	183.955	-5.04954	-8.09954	1197.51	1275.01
		0.1536	-6.93708	1055.68	317.363	193.725	-0.779541	-12.9895	1197.81	1275.91
		0.1537	-6.63708	1059.68	317.221	179.075	-3.82954	6.85046	1190.51	1272.01
		0.1538	-7.54708	1065.48	317.09	187.925	-4.43954	-8.09954	1190.81	1282.71
		0.1539	-15.4871	1064.48	316.972	191.585	-4.43954	-1.08954	1199.31	1275.01
		0.154	-15.7871	1065.18	316.87	189.145	-10.8495	-5.04954	1195.31	1275.61
		0.1541	-9.07708	1063.88	316.784	194.635	-5.04954	-4.43954	1193.21	1279.91
		0.1542	-5.71708	1080.38	316.717	193.115	-5.96954	-0.469541	1202.41	1276.91
		0.1543	-9.98708	1083.78	316.669	191.285	1.36046	-9.93954	1193.81	1281.41
		0.1544	-15.1771	1076.78	316.64	188.235	-6.57954	-0.169541	1196.31	1263.71
		0.1545	-15.4871	1092.88	316.632	191.585	-4.74954	-5.35954	1189.21	1267.11
		0.1546	-6.63708	1080.68	316.644	195.245	-10.2395	-2.91954	1192.61	1270.81
		0.1547	-6.93708	1089.28	316.676	199.215	-0.779541	-1.69954	1191.41	1265.61
		0.1548	-11.2171	1086.18	316.727	187.005	-4.13954	-3.82954	1198.71	1261.31
		0.1549	-6.32708	1087.38	316.797	201.045	-2.60954	-5.04954	1185.31	1272.61
		0.155	-11.5171	1089.58	316.884	194.025	-5.35954	6.85046	1193.81	1257.91
		0.1551	-11.2171	1076.48	316.986	192.505	-0.779541	0.140459	1189.81	1263.41
		0.1552	-6.93708	1082.18	317.102	190.365	-3.82954	4.71046	1201.41	1260.41
		0.1553	-6.93708	1083.48	317.228	195.865	-3.82954	-0.779541	1193.81	1256.11
		0.1554	-13.0471	1081.88	317.362	191.895	-7.18954	0.440459	1196.31	1246.71
		0.1555	-9.37708	1085.88	317.501	188.845	-17.8695	-1.38954	1194.41	1256.41
		0.1556	-13.9571	1080.68	317.64	192.505	-11.1595	-2.30954	1194.11	1267.41
		0.1557	-17.3171	1071.28	317.777	190.365	-10.2395	-2.30954	1186.81	1267.11
		0.1558	-17.6171	1067.28	317.906	190.975	-10.5495	-1.08954	1185.91	1271.41
		0.1559	-14.2671	1062.38	318.024	193.725	-9.62954	-3.82954	1189.81	1276.61
		0.156	-24.3371	1061.18	318.125	188.845	-13.8995	-1.08954	1199.91	1280.81
		0.1561	-8.15708	1055.98	318.206	192.505	-2.60954	-10.2395	1193.51	1295.51
		0.1562	-14.2671	1044.08	318.26	190.675	-6.57954	-6.57954	1191.11	1301.61
		0.1563	-15.1771	1048.38	318.284	192.505	-3.52954	-3.21954	1204.81	1312.31
		0.1564	-17.3171	1046.48	318.272	194.635	-8.40954	-9.62954	1197.51	1302.21
		0.1565	-17.0071	1047.18	318.22	189.755	-2.60954	1.05046	1194.71	1306.81
		0.1566	-16.0971	1048.38	318.125	190.975	-5.96954	11.7305	1192.91	1302.81
		0.1567	-17.6171	1042.58	317.98	197.695	-7.18954	-0.169541	1205.11	1299.11
		0.1568	-31.6571	1036.48	317.783	196.475	-7.79954	4.10046	1188.31	1298.51
		0.1569	-22.1971	1028.18	317.531	192.505	-2.30954	-8.40954	1186.51	1297.31
		0.157	-12.1271	1023.68	317.219	197.085	-1.38954	0.440459	1184.71	1299.41
		0.1571	-20.9771	1030.08	316.845	195.865	1.05046	-5.96954	1186.21	1299.81
		0.1572	-12.7371	1022.08	316.407	192.505	-4.74954	-3.82954	1185.01	1326.91
		0.1573	-18.2271	1012.38	315.903	189.755	-5.35954	5.32046	1184.41	1336.11
		0.1574	-11.5171	1018.78	315.332	190.365	-6.26954	-0.169541	1181.61	1344.31
		0.1575	-9.68708	1016.28	314.692	192.805	1.36046	-2.91954	1181.61	1341.31
		0.1576	-15.7871	1015.98	313.985	198.605	-5.96954	1.66046	1176.71	1348.31
		0.1577	-17.3171	1013.28	313.211	201.355	-6.26954	0.750459	1172.11	1357.71
		0.1578	-18.5371	1012.08	312.371	190.975	-2.30954	-0.469541	1169.71	1360.51
		0.1579	-16.7071	1012.98	311.467	197.695	-7.48954	-4.43954	1168.81	1362.01
		0.158	-11.8271	1022.38	310.501	199.215	-6.26954	-2.30954	1173.41	1354.41
		0.1581	-21.2871	1020.58	309.477	199.215	-5.96954	-8.40954	1174.01	1366.91
		0.1582	-18.2271	1023.38	308.397	199.825	-6.57954	1.97046	1171.21	1364.81
		0.1583	-13.9571	1023.98	307.265	196.165	-1.99954	5.93046	1175.51	1365.71
		0.1584	-18.2271	1031.28	306.086	197.085	-7.48954	2.88046	1170.31	1362.31
		0.1585	-20.0671	1023.98	304.864	194.025	-7.79954	-0.779541	1165.11	1363.51
		0.1586	-17.3171	1009.58	303.602	197.085	-11.7695	-3.52954	1176.41	1362.61
		0.1587	-9.68708	1019.38	302.307	193.115	-10.2395	3.80046	1168.51	1363.81
		0.1588	-25.2471	1021.18	300.982	191.285	-13.5995	3.19046	1174.61	1364.81
		0.1589	-12.7371	1027.58	299.632	186.095	-8.70954	-2.30954	1178.61	1369.61
		0.159	-11.2171	1034.88	298.263	191.895	-12.0695	-3.82954	1177.31	1380.91
		0.1591	-20.6771	1026.98	296.879	196.475	-11.7695	4.10046	1172.81	1372.11
		0.1592	-11.5171	1024.58	295.485	189.145	-14.8195	-0.169541	1171.81	1373.01
		0.1593	-11.2171	1030.98	294.086	187.315	-10.5495	-1.69954	1177.91	1368.71
		0.1594	-14.2671	1045.88	292.686	195.555	-9.01954	-0.169541	1168.81	1377.61
		0.1595	-12.1271	1037.08	291.289	196.775	-12.6795	-0.779541	1173.41	1386.11
		0.1596	-13.3471	1038.28	289.899	194.025	-14.8195	-2.91954	1173.41	1402.31
		0.1597	-6.93708	1045.88	288.519	194.635	-12.3795	3.80046	1163.91	1403.21
		0.1598	-4.19708	1045.28	287.153	186.705	-4.13954	-4.43954	1162.11	1411.41
		0.1599	-21.5871	1042.88	285.803	201.045	-9.32954	-1.08954	1163.91	1411.81
		0.16	-16.0971	1044.68	284.471	200.745	-9.93954	1.97046	1157.21	1416.31
		0.1601	-12.1271	1046.78	283.158	200.745	-15.7295	-5.04954	1159.91	1413.61
		0.1602	-11.2171	1048.38	281.866	205.625	-16.0395	6.24046	1162.71	1418.21
		0.1603	-15.7871	1051.68	280.595	198.605	-1.08954	-1.69954	1174.91	1419.41
		0.1604	-16.7071	1051.68	279.344	204.715	-10.8495	-4.43954	1162.11	1418.21
		0.1605	-0.227084	1054.78	278.114	203.185	-6.57954	-3.82954	1159.31	1429.81
		0.1606	-14.2671	1071.28	276.902	201.965	-3.82954	4.10046	1163.01	1438.01
		0.1607	-12.7371	1063.58	275.706	201.355	-7.79954	6.85046	1160.21	1439.51
		0.1608	-10.5971	1069.68	274.525	203.185	-8.70954	4.41046	1162.41	1433.11
		0.1609	-2.05708	1059.08	273.356	212.945	-3.21954	-0.469541	1164.81	1434.31
		0.161	-10.5971	1050.48	272.194	200.745	-9.01954	-1.08954	1167.61	1427.91
		0.1611	-6.63708	1062.08	271.038	207.155	-2.60954	2.27046	1169.11	1425.21
		0.1612	-9.98708	1061.18	269.883	208.375	-22.7495	2.58046	1174.61	1435.61
		0.1613	-15.4871	1059.98	268.725	205.015	0.140459	-2.91954	1165.71	1434.01
		0.1614	-14.5671	1066.38	267.561	208.985	-7.48954	0.750459	1168.21	1425.81
		0.1615	-14.5671	1067.58	266.387	211.115	-8.09954	-4.13954	1172.11	1432.51
		0.1616	-15.7871	1058.78	265.199	203.485	-6.26954	-0.469541	1168.81	1425.21
		0.1617	-13.3471	1074.58	263.994	213.865	-5.96954	-0.469541	1170.91	1421.81
		0.1618	-7.85708	1083.18	262.769	214.175	-9.62954	2.88046	1179.21	1421.81
		0.1619	-3.88708	1083.78	261.522	205.325	-8.70954	-5.35954	1167.91	1409.61
		0.162	-11.2171	1081.88	260.252	212.035	1.36046	4.10046	1175.21	1410.51
		0.1621	-3.27708	1081.88	258.956	204.095	-5.35954	6.24046	1165.41	1410.81
		0.1622	-9.07708	1085.88	257.635	217.835	-9.62954	-1.38954	1188.61	1396.21
		0.1623	-9.37708	1080.68	256.287	214.175	-2.30954	1.97046	1173.71	1403.81
		0.1624	-8.46708	1062.68	254.914	217.225	-6.26954	-1.99954	1169.11	1398.91
		0.1625	-11.5171	1082.18	253.517	212.945	-5.04954	-1.99954	1170.31	1395.31
		0.1626	-7.54708	1079.18	252.098	216.615	-7.18954	4.41046	1177.31	1383.71
		0.1627	-7.54708	1074.58	250.658	216.305	-0.169541	1.36046	1173.11	1393.71
		0.1628	-7.24708	1075.18	249.202	223.635	-9.01954	3.19046	1179.51	1381.51
		0.1629	-4.19708	1071.28	247.732	210.815	-10.8495	-4.13954	1169.41	1380.01
		0.163	0.992916	1070.68	246.253	216.005	-4.43954	-2.30954	1164.81	1379.71
		0.1631	-10.5971	1068.78	244.77	215.395	-3.82954	-1.99954	1167.01	1383.71
		0.1632	-20.0671	1064.88	243.288	218.135	-9.01954	3.19046	1175.21	1382.11
		0.1633	-0.227084	1066.98	241.811	226.075	-5.35954	-3.52954	1165.71	1369.31
		0.1634	-0.527084	1065.78	240.346	219.055	-1.38954	-3.82954	1169.11	1378.81
		0.1635	-9.07708	1082.18	238.9	226.075	-5.04954	-0.469541	1156.91	1380.91
		0.1636	-6.02708	1076.48	237.477	211.425	-1.08954	6.54046	1153.21	1374.81
		0.1637	-2.97708	1081.58	236.086	212.335	-7.48954	4.71046	1157.81	1373.61
		0.1638	-12.7371	1082.58	234.732	213.565	-5.35954	-3.21954	1154.41	1361.41
		0.1639	-15.7871	1082.58	233.423	218.745	-4.74954	-10.2395	1148.61	1363.51
		0.164	-10.9071	1087.98	232.164	209.595	-13.2895	-3.82954	1154.11	1362.61
		0.1641	-3.88708	1071.28	230.964	219.055	7.46046	6.24046	1150.81	1367.81
		0.1642	-2.97708	1068.78	229.827	216.915	-11.7695	-1.08954	1146.21	1363.81
		0.1643	-4.49708	1069.08	228.76	208.375	5.02046	-2.60954	1154.41	1369.91
		0.1644	-5.71708	1066.08	227.769	212.945	-3.82954	2.27046	1152.91	1371.21
		0.1645	-5.71708	1066.98	226.858	206.545	-7.48954	2.88046	1134.01	1368.71
		0.1646	-1.44708	1059.68	226.034	216.005	-4.74954	-0.469541	1144.71	1361.71
		0.1647	-3.58708	1050.18	225.299	212.335	-11.4595	-2.91954	1149.01	1361.41
		0.1648	-6.32708	1052.98	224.657	212.035	-9.93954	-5.35954	1151.41	1355.61
		0.1649	-2.36708	1051.68	224.112	209.595	-4.43954	-1.08954	1145.91	1351.31
		0.165	0.992916	1044.38	223.666	209.595	-15.1195	4.41046	1151.11	1360.21
		0.1651	-2.66708	1044.08	223.32	218.135	-2.91954	-7.79954	1146.51	1356.81
		0.1652	-8.46708	1037.98	223.075	208.065	-9.01954	3.49046	1148.61	1346.71
		0.1653	-3.27708	1046.78	222.931	219.055	-8.09954	0.140459	1158.41	1348.31
		0.1654	-2.05708	1044.68	222.886	219.665	0.140459	4.10046	1159.31	1337.91
		0.1655	-5.71708	1031.88	222.94	218.745	-10.2395	1.36046	1144.71	1350.71
		0.1656	-1.74708	1034.88	223.09	216.915	-9.32954	2.58046	1142.81	1350.11
		0.1657	-6.32708	1031.58	223.333	214.475	-3.21954	-0.169541	1143.21	1349.51
		0.1658	-9.98708	1031.28	223.664	219.355	-6.26954	-0.779541	1151.71	1349.21
		0.1659	-2.97708	1026.38	224.079	216.005	-10.2395	-8.09954	1152.91	1345.81
		0.166	0.0829157	1030.38	224.573	209.285	-7.18954	-1.08954	1150.51	1363.81
		0.1661	-6.02708	1015.98	225.14	221.495	-12.0695	-1.69954	1159.31	1360.81
		0.1662	3.43292	1025.48	225.772	221.185	-3.82954	-0.169541	1147.71	1359.01
		0.1663	-5.41708	1027.28	226.465	217.835	-12.6795	-1.99954	1163.01	1356.51
		0.1664	-5.41708	1020.58	227.208	218.135	-13.5995	-0.469541	1152.61	1354.71
		0.1665	-3.88708	1021.78	227.997	217.225	-9.62954	-3.21954	1162.41	1363.81
		0.1666	-5.71708	1016.58	228.82	213.865	-27.6395	-0.169541	1152.91	1365.41
		0.1667	-6.32708	1022.08	229.672	218.445	-12.6795	-0.469541	1156.31	1371.81
		0.1668	-6.32708	1015.98	230.543	218.745	-15.1195	4.41046	1145.61	1370.91
		0.1669	-7.24708	1017.58	231.424	212.645	-18.4795	-4.74954	1145.01	1372.71
		0.167	-17.3171	1019.68	232.308	210.815	-14.5095	-3.82954	1147.11	1377.01
		0.1671	-6.02708	1019.68	233.185	213.565	-20.3095	-9.62954	1149.31	1373.31
		0.1672	-9.98708	1008.08	234.047	217.225	-20.6195	-0.779541	1151.11	1374.51
		0.1673	-4.49708	1024.28	234.887	209.595	-12.6795	0.750459	1146.81	1381.81
		0.1674	-11.8271	1017.88	235.697	218.745	-3.52954	1.36046	1149.01	1380.31
		0.1675	-4.19708	1019.38	236.47	220.275	-15.7295	-8.70954	1159.01	1373.91
		0.1676	-6.93708	1031.58	237.198	222.105	-16.9495	-1.08954	1144.41	1376.71
		0.1677	-9.07708	1016.28	237.877	219.055	-19.3995	-0.169541	1146.21	1376.41
		0.1678	-8.76708	1023.98	238.5	222.415	-11.1595	-1.38954	1147.41	1375.41
		0.1679	-8.76708	1029.78	239.062	218.745	-16.3395	-6.26954	1138.91	1378.21
		0.168	0.382916	1016.58	239.56	220.885	-12.9895	0.750459	1147.41	1390.71
		0.1681	-5.71708	1021.48	239.989	224.855	-5.35954	2.58046	1139.21	1384.31
		0.1682	-11.5171	1020.88	240.347	227.905	-7.18954	9.29046	1146.21	1385.21
		0.1683	-9.68708	1021.78	240.631	223.635	-9.01954	-1.99954	1140.11	1380.91
		0.1684	-3.58708	1018.18	240.84	234.315	-17.8695	1.66046	1141.31	1389.81
		0.1685	-4.19708	1015.98	240.974	230.955	-1.69954	7.46046	1137.11	1377.31
		0.1686	-6.93708	1019.68	241.031	230.345	-12.0695	2.27046	1136.71	1384.01
		0.1687	-7.24708	1020.58	241.012	227.905	-3.52954	-4.74954	1128.21	1380.91
		0.1688	-14.2671	1019.38	240.918	232.175	-5.65954	-4.43954	1133.11	1380.91
		0.1689	-15.4871	1009.88	240.752	237.055	-5.96954	-0.169541	1131.91	1380.01
		0.169	-10.9071	1019.98	240.514	233.095	-9.62954	2.88046	1126.41	1379.71
		0.1691	-6.02708	1018.18	240.21	226.685	-7.79954	3.49046	1128.21	1369.01
		0.1692	-7.54708	1016.88	239.841	223.935	-7.79954	-2.91954	1134.61	1374.21
		0.1693	-11.2171	1012.08	239.411	230.955	-1.08954	4.10046	1131.61	1380.31
		0.1694	-0.837084	1014.78	238.925	232.785	-1.99954	-3.21954	1139.21	1382.11
		0.1695	-19.1471	1019.38	238.386	232.175	-12.0695	-1.38954	1136.71	1384.91
		0.1696	-6.02708	1021.48	237.8	234.005	-8.70954	2.27046	1136.71	1384.01
		0.1697	-14.8771	1025.18	237.172	226.985	-5.35954	-3.52954	1126.71	1380.91
		0.1698	-11.8271	1028.78	236.505	230.955	-9.62954	3.80046	1123.01	1382.51
		0.1699	-9.37708	1021.48	235.806	227.295	-5.96954	-4.13954	1135.51	1388.61
		0.17	-10.9071	1021.18	235.079	230.955	-11.4595	1.05046	1128.21	1389.81
		0.1701	-8.46708	1024.58	234.329	226.375	-1.69954	6.85046	1143.21	1373.01
		0.1702	-11.2171	1023.68	233.56	235.835	-7.48954	-3.21954	1146.81	1376.41
		0.1703	-7.85708	1023.98	232.779	230.035	-1.38954	3.19046	1133.11	1376.71
		0.1704	-12.1271	1028.48	231.988	234.925	4.10046	0.750459	1136.41	1379.41
		0.1705	-11.8271	1037.68	231.193	222.415	-1.99954	4.71046	1133.11	1377.31
		0.1706	-4.19708	1043.18	230.396	234.615	-2.30954	-0.779541	1134.01	1375.71
		0.1707	-16.7071	1041.08	229.602	232.785	-5.35954	2.58046	1139.81	1373.31
		0.1708	-11.5171	1038.88	228.813	227.905	-11.7695	-3.82954	1151.11	1379.71
		0.1709	-6.02708	1039.78	228.033	221.495	-1.38954	0.750459	1146.21	1377.91
		0.171	-6.63708	1021.48	227.264	224.855	-7.79954	-4.13954	1152.01	1376.41
		0.1711	-6.32708	1031.58	226.507	227.595	-0.469541	1.36046	1149.61	1375.71
		0.1712	-7.85708	1028.18	225.765	228.515	-8.40954	-2.30954	1152.31	1385.51
		0.1713	-9.37708	1021.48	225.039	223.935	-11.1595	8.68046	1150.21	1380.31
		0.1714	0.382916	1027.58	224.33	229.125	-12.0695	2.27046	1148.31	1362.61
		0.1715	-15.4871	1027.88	223.64	226.375	1.66046	-0.169541	1151.41	1367.51
		0.1716	-2.36708	1014.78	222.969	231.265	0.440459	6.85046	1142.81	1372.71
		0.1717	0.382916	1009.28	222.318	226.075	-11.7695	-1.99954	1150.21	1357.11
		0.1718	-9.37708	1014.48	221.688	235.225	-3.21954	3.80046	1154.81	1357.71
		0.1719	-9.98708	1029.78	221.078	231.565	-2.91954	2.88046	1149.61	1362.61
		0.172	-11.5171	1042.58	220.488	223.935	-5.04954	5.93046	1146.81	1359.31
		0.1721	-6.93708	1047.78	219.919	216.305	-7.18954	-2.30954	1146.21	1360.21
		0.1722	-13.3471	1047.78	219.37	225.155	-5.35954	-3.21954	1137.11	1369.01
		0.1723	-12.4371	1057.78	218.84	225.465	-0.469541	1.05046	1135.51	1364.11
		0.1724	-9.68708	1044.68	218.329	230.035	-8.40954	1.66046	1135.21	1374.21
		0.1725	-9.37708	1043.78	217.836	225.155	-12.0695	4.10046	1136.71	1364.11
		0.1726	-7.54708	1043.48	217.36	231.565	-6.26954	4.41046	1137.41	1359.61
		0.1727	-5.10708	1047.18	216.9	229.125	-16.3395	8.38046	1131.61	1365.41
		0.1728	-12.1271	1031.88	216.453	229.125	6.54046	-2.30954	1133.41	1365.11
		0.1729	-13.3471	1037.38	216.019	223.325	-7.79954	7.15046	1129.71	1351.91
		0.173	-5.41708	1032.18	215.595	222.415	2.88046	-5.04954	1134.31	1363.81
		0.1731	-14.5671	1038.88	215.179	224.245	-3.52954	8.99046	1133.71	1351.01
		0.1732	-24.0271	1037.98	214.77	232.485	-9.01954	-3.82954	1115.11	1347.41
		0.1733	-13.9571	1033.68	214.364	221.185	-8.40954	2.88046	1130.31	1348.31
		0.1734	-9.07708	1031.28	213.959	224.545	3.49046	3.49046	1118.71	1347.41
		0.1735	-3.88708	1037.38	213.552	222.105	-3.21954	8.38046	1127.91	1338.51
		0.1736	-4.80708	1020.58	213.141	221.495	-0.469541	3.19046	1127.01	1335.21
		0.1737	-14.2671	1028.18	212.724	219.965	-9.01954	-1.69954	1136.41	1335.51
		0.1738	-13.3471	1024.88	212.297	227.295	-3.52954	2.88046	1124.21	1329.01
		0.1739	-17.3171	1037.98	211.859	223.325	-12.3795	-5.04954	1118.41	1329.71
		0.174	-9.68708	1031.28	211.406	227.595	-5.96954	-1.08954	1124.51	1326.31
		0.1741	-20.3671	1027.58	210.937	233.095	-5.04954	2.58046	1128.51	1332.41
		0.1742	-13.9571	1020.88	210.449	238.585	-5.96954	1.97046	1118.41	1330.61
		0.1743	-3.27708	1015.68	209.941	230.655	-11.7695	-0.169541	1128.21	1339.11
		0.1744	-8.15708	1008.68	209.409	222.105	-8.70954	3.19046	1123.91	1344.01
		0.1745	-18.2271	1022.68	208.853	228.815	-1.38954	-0.469541	1121.51	1336.71
		0.1746	-10.5971	1018.48	208.271	224.855	-14.5095	3.49046	1129.71	1335.51
		0.1747	-11.8271	1011.78	207.661	227.295	-9.62954	3.49046	1127.31	1325.71
		0.1748	-3.88708	1019.68	207.022	235.225	-3.82954	3.80046	1126.11	1332.11
		0.1749	-9.07708	1017.18	206.354	234.925	-20.9195	-1.38954	1120.61	1330.01
		0.175	-16.7071	1013.28	205.654	231.875	-11.1595	5.32046	1122.11	1323.61
		0.1751	-6.63708	1007.48	204.924	235.835	-4.13954	-0.779541	1121.81	1328.11
		0.1752	-15.4871	1017.88	204.162	238.585	-9.62954	-1.08954	1116.31	1330.61
		0.1753	-19.1471	1007.48	203.369	239.195	-11.1595	-8.09954	1123.91	1326.91
		0.1754	-8.46708	1012.98	202.545	244.995	-6.87954	1.36046	1129.11	1325.11
		0.1755	-4.49708	1013.28	201.692	243.775	-4.13954	-3.21954	1122.11	1315.31
		0.1756	-11.2171	1013.28	200.81	244.685	-12.9895	1.97046	1122.41	1327.81
		0.1757	-13.3471	1013.58	199.9	239.505	-4.74954	-0.169541	1125.51	1313.51
		0.1758	-13.6571	997.983	198.966	235.225	-13.2895	2.27046	1122.11	1313.51
		0.1759	-7.85708	1003.78	198.009	243.165	-13.8995	-2.60954	1129.11	1307.41
		0.176	-14.2671	989.783	197.032	251.095	-12.9895	-6.87954	1120.31	1311.01
		0.1761	-16.7071	996.183	196.039	244.685	-8.70954	-4.13954	1119.41	1319.31
		0.1762	-16.0971	988.283	195.033	248.965	-16.9495	1.05046	1116.91	1314.11
		0.1763	-8.46708	989.783	194.017	249.265	-18.4795	-5.96954	1127.91	1315.91
		0.1764	-15.7871	1002.88	192.997	254.455	-14.8195	-1.69954	1121.81	1311.31
		0.1765	-12.1271	994.983	191.976	262.695	-10.2395	-2.91954	1114.81	1304.91
		0.1766	-17.0071	998.583	190.96	273.675	-5.96954	0.750459	1112.61	1307.11
		0.1767	-11.8271	1001.38	189.953	269.105	-9.01954	-3.21954	1115.11	1315.61
		0.1768	-9.37708	1002.58	188.961	266.965	-12.0695	-1.69954	1118.41	1309.21
		0.1769	-20.9771	996.783	187.989	270.625	-9.01954	3.49046	1120.61	1317.81
		0.177	-15.1771	995.583	187.044	279.475	-10.5495	8.38046	1116.91	1304.31
		0.1771	-20.0671	986.383	186.13	277.035	-8.40954	3.19046	1109.01	1313.81
		0.1772	-10.5971	992.783	185.253	283.445	-5.35954	-1.38954	1113.91	1317.11
		0.1773	-16.0971	985.183	184.419	285.275	-4.74954	0.750459	1111.41	1313.51
		0.1774	-10.9071	998.283	183.634	287.415	-8.09954	-2.60954	1115.11	1302.21
		0.1775	-20.0671	1007.48	182.904	284.055	-7.79954	-4.13954	1107.41	1311.31
		0.1776	-14.5671	1007.48	182.232	298.095	-1.08954	-1.99954	1111.11	1312.91
		0.1777	-17.9271	1008.38	181.626	286.495	2.27046	3.80046	1099.51	1306.81
		0.1778	-6.63708	1010.48	181.089	288.325	-1.38954	11.7305	1103.51	1304.01
		0.1779	-11.5171	1008.68	180.626	295.655	-4.13954	2.58046	1102.31	1303.41
		0.178	-26.4671	1007.48	180.24	293.215	-13.5995	3.80046	1106.81	1300.11
		0.1781	-21.5871	1004.38	179.936	279.175	-4.43954	6.85046	1104.41	1304.01
		0.1782	-28.2971	1010.78	179.716	298.095	-10.8495	2.27046	1101.71	1292.41
		0.1783	-17.0071	1013.88	179.583	295.345	-4.43954	-1.38954	1108.11	1307.71
		0.1784	-32.2671	1009.58	179.539	288.935	-3.52954	5.93046	1102.01	1305.21
		0.1785	-20.9771	1006.58	179.585	284.975	-1.69954	1.36046	1104.11	1304.91
		0.1786	-16.7071	1009.28	179.724	284.975	-7.79954	1.05046	1109.31	1311.71
		0.1787	-17.6171	1002.88	179.954	290.765	-4.43954	1.36046	1113.91	1309.81
		0.1788	-17.3171	992.483	180.276	281.615	-8.70954	-3.82954	1109.01	1304.61
		0.1789	-15.4871	1013.58	180.689	276.425	3.19046	7.15046	1111.41	1302.21
		0.179	-12.7371	1012.38	181.191	283.445	2.88046	9.90046	1106.81	1309.21
		0.1791	-11.2171	997.983	181.782	290.765	-5.96954	2.88046	1109.61	1306.81
		0.1792	-20.6771	1003.18	182.458	292.295	1.36046	10.5105	1100.71	1310.11
		0.1793	-25.2471	995.583	183.216	293.215	-14.2095	-0.469541	1107.11	1309.51
		0.1794	-26.4671	993.383	184.052	296.565	-2.30954	1.97046	1095.21	1319.31
		0.1795	-10.9071	999.483	184.962	291.385	-3.82954	-4.13954	1091.61	1322.91
		0.1796	-21.8971	996.483	185.942	290.465	0.750459	4.41046	1098.61	1323.31
		0.1797	-20.3671	994.383	186.986	293.215	-7.79954	5.93046	1096.21	1312.91
		0.1798	-23.4171	999.883	188.087	293.825	-1.69954	-3.21954	1099.21	1312.61
		0.1799	-18.2271	1006.88	189.24	296.265	-6.87954	5.02046	1102.91	1309.51
		0.18	-29.8271	1012.68	190.439	289.545	-3.82954	0.440459	1111.11	1318.41
		0.1801	-23.4171	1023.98	191.675	293.515	-1.69954	-1.38954	1121.51	1311.01
		0.1802	-20.3671	1017.58	192.941	296.265	-4.43954	-7.18954	1127.31	1310.71
		0.1803	-31.0471	1013.58	194.231	305.415	0.440459	-1.38954	1116.31	1319.31
		0.1804	-19.4471	1007.18	195.535	303.895	-6.26954	4.41046	1118.11	1316.81
		0.1805	-15.7871	1012.98	196.847	308.465	12.9505	-3.82954	1118.71	1321.41
		0.1806	-16.7071	1005.98	198.157	308.465	-1.08954	1.05046	1128.81	1317.11
		0.1807	-19.1471	1004.98	199.459	309.085	-7.79954	-6.87954	1112.01	1317.11
		0.1808	-25.2471	998.883	200.745	308.165	1.36046	3.80046	1126.71	1302.21
		0.1809	-26.4671	1000.48	202.006	316.095	-0.469541	1.05046	1121.51	1318.11
		0.181	-19.1471	991.883	203.235	309.385	-1.69954	1.66046	1124.81	1305.21
		0.1811	-26.1671	998.883	204.425	318.545	0.440459	3.19046	1118.11	1317.81
		0.1812	-29.2171	987.983	205.569	318.845	-10.8495	3.80046	1116.01	1319.61
		0.1813	-27.9971	987.283	206.66	316.405	-9.93954	-1.08954	1107.41	1328.41
		0.1814	-24.9471	990.083	207.693	311.525	4.41046	1.05046	1114.21	1320.51
		0.1815	-31.0471	988.583	208.662	319.455	-1.69954	-5.65954	1110.81	1321.11
		0.1816	-16.3971	980.883	209.561	327.395	-8.70954	-1.69954	1105.91	1332.11
		0.1817	-29.8271	991.283	210.386	313.655	-3.21954	5.32046	1108.41	1338.51
		0.1818	-19.4471	992.783	211.133	321.595	-2.91954	2.27046	1111.71	1341.31
		0.1819	-19.1471	993.083	211.799	324.335	3.49046	-5.96954	1111.71	1345.51
		0.182	-20.0671	997.683	212.38	320.375	-10.8495	-2.30954	1108.41	1358.31
		0.1821	-20.3671	1000.18	212.874	323.725	-11.1595	-7.48954	1096.21	1369.91
		0.1822	-15.4871	993.383	213.279	331.665	3.19046	-5.04954	1098.61	1379.11
		0.1823	-19.4471	989.183	213.595	331.355	-9.01954	-9.93954	1102.91	1384.91
		0.1824	-18.8371	991.283	213.821	334.715	-8.40954	-6.26954	1094.31	1377.91
		0.1825	-22.5071	999.183	213.957	337.465	-6.87954	-2.91954	1092.51	1390.11
		0.1826	-20.9771	990.683	214.003	343.875	-10.5495	-2.60954	1085.51	1383.71
		0.1827	-20.6771	987.583	213.962	353.635	-7.79954	-5.96954	1081.21	1391.61
		0.1828	-17.6171	992.183	213.834	353.635	-5.65954	-3.21954	1081.21	1404.41
		0.1829	-20.9771	982.783	213.622	354.555	-19.6995	-3.52954	1088.51	1409.31
		0.183	-12.7371	985.183	213.33	362.185	-16.6495	-8.40954	1087.61	1422.41
		0.1831	-24.0271	981.783	212.961	364.925	-2.30954	-7.18954	1078.81	1437.41
		0.1832	-22.1971	986.383	212.519	374.995	-20.9195	-1.69954	1076.61	1436.51
		0.1833	-18.2271	980.583	212.008	373.775	-18.4795	-8.09954	1077.21	1439.51
		0.1834	-16.3971	979.383	211.434	374.085	-13.2895	-2.91954	1077.21	1441.01
		0.1835	-22.5071	978.783	210.802	372.865	-11.7695	-3.21954	1066.61	1451.11
		0.1836	-15.4871	984.583	210.118	381.405	-10.2395	-3.21954	1068.71	1455.11
		0.1837	-11.8271	988.583	209.386	386.285	-7.79954	-1.99954	1067.21	1456.31
		0.1838	-30.7471	969.883	208.614	377.135	-13.8995	-7.18954	1066.31	1461.21
		0.1839	-28.2971	972.683	207.807	388.735	-16.6495	-0.469541	1061.41	1462.41
		0.184	-30.1371	968.983	206.972	378.965	-16.3395	-3.52954	1063.51	1460.31
		0.1841	-28.9171	982.183	206.113	383.845	-10.2395	-6.87954	1069.91	1468.51
		0.1842	-18.2271	972.383	205.238	392.085	-13.2895	-1.38954	1058.91	1461.81
		0.1843	-23.7271	972.083	204.352	382.325	-12.3795	1.66046	1058.91	1459.71
		0.1844	-24.9471	983.083	203.462	390.255	-12.0695	-8.40954	1055.61	1467.01
		0.1845	-28.9171	973.283	202.571	382.935	-9.93954	0.440459	1057.71	1459.41
		0.1846	-25.2471	979.983	201.688	385.375	-10.5495	1.66046	1057.71	1466.11
		0.1847	-30.7471	977.283	200.815	386.285	-10.2395	-7.48954	1054.71	1457.51
		0.1848	-31.6571	977.283	199.958	383.235	-10.5495	-1.69954	1053.11	1467.01
		0.1849	-21.8971	969.283	199.123	386.905	-1.38954	4.71046	1053.71	1456.31
		0.185	-18.2271	979.983	198.312	378.355	-12.6795	3.80046	1051.91	1451.71
		0.1851	-34.4071	975.383	197.529	386.595	0.440459	1.97046	1044.91	1455.71
		0.1852	-28.2971	979.683	196.779	382.935	-21.5295	-5.04954	1041.21	1464.51
		0.1853	-28.2971	984.583	196.063	380.185	-6.26954	7.46046	1045.81	1469.71
		0.1854	-18.5371	984.583	195.385	383.545	-2.60954	2.58046	1048.61	1452.91
		0.1855	-20.6771	990.083	194.745	379.275	-3.52954	-10.2395	1053.41	1463.01
		0.1856	-29.8271	980.283	194.146	374.695	-9.01954	-1.69954	1047.01	1451.11
		0.1857	-38.6771	998.283	193.588	383.845	-9.93954	-7.79954	1049.51	1455.11
		0.1858	-33.4871	986.983	193.071	380.495	-10.2395	1.05046	1050.11	1447.51
		0.1859	-28.9171	977.583	192.596	377.435	-11.1595	-4.74954	1045.81	1442.61
		0.186	-20.9771	990.983	192.162	382.935	-10.2395	-5.35954	1040.01	1446.21
		0.1861	-26.4671	994.683	191.77	373.775	-11.1595	-3.82954	1041.21	1469.71
		0.1862	-21.5871	986.683	191.418	371.645	-6.87954	-4.13954	1044.61	1466.71
		0.1863	-27.6871	985.783	191.106	378.965	-10.5495	-5.96954	1038.81	1471.61
		0.1864	-15.7871	974.183	190.831	383.235	-6.87954	-1.08954	1039.71	1473.71
		0.1865	-17.3171	973.583	190.594	380.185	-8.40954	-2.30954	1037.91	1456.01
		0.1866	-27.9971	981.483	190.391	379.575	-9.32954	2.27046	1037.61	1464.51
		0.1867	-31.0471	979.083	190.222	375.605	-15.1195	-1.69954	1040.31	1471.61
		0.1868	-23.4171	983.983	190.085	372.555	-7.18954	6.85046	1033.61	1463.31
		0.1869	-17.9271	975.083	189.977	378.355	-9.32954	-1.08954	1027.81	1460.01
		0.187	-21.8971	979.083	189.897	378.665	-9.62954	-5.35954	1025.41	1458.41
		0.1871	-19.4471	976.383	189.843	381.105	-6.87954	-1.99954	1032.11	1466.41
		0.1872	-28.9171	978.483	189.812	379.575	-9.32954	-1.69954	1029.91	1456.01
		0.1873	-9.98708	976.683	189.803	386.285	-3.82954	3.49046	1026.61	1456.01
		0.1874	-19.7571	985.183	189.814	384.765	-1.99954	0.750459	1030.51	1456.31
		0.1875	-25.5571	965.083	189.843	384.455	-1.08954	-7.79954	1033.61	1452.01
		0.1876	-14.2671	976.683	189.889	390.565	-5.65954	1.97046	1034.51	1450.81
		0.1877	-18.8371	969.583	189.95	393.305	-3.82954	6.54046	1039.11	1462.41
		0.1878	-24.6371	968.983	190.024	384.455	-12.3795	0.140459	1049.21	1457.21
		0.1879	-21.8971	960.483	190.111	398.495	-7.79954	-5.65954	1038.51	1443.51
		0.188	-25.2471	973.283	190.21	384.455	-2.91954	3.80046	1036.01	1448.41
		0.1881	-28.2971	971.183	190.321	391.785	-7.18954	-0.169541	1034.81	1450.51
		0.1882	-20.0671	965.983	190.442	379.885	-3.21954	-5.35954	1031.81	1434.91
		0.1883	-22.1971	973.283	190.574	385.375	-9.01954	-0.469541	1032.11	1426.71
		0.1884	-17.6171	987.983	190.717	390.255	-7.79954	-1.38954	1030.21	1430.71
		0.1885	-21.2871	979.083	190.872	387.815	-8.40954	4.41046	1026.01	1435.61
		0.1886	-20.0671	985.483	191.04	379.885	-6.87954	-5.65954	1028.41	1432.81
		0.1887	-15.4871	982.183	191.222	390.565	-3.52954	0.750459	1029.91	1436.81
		0.1888	-24.0271	991.583	191.418	374.085	-1.99954	-0.779541	1032.11	1436.81
		0.1889	-17.6171	987.583	191.631	378.965	-0.169541	2.58046	1028.71	1439.21
		0.189	-16.7071	984.583	191.861	367.365	-9.93954	2.88046	1032.41	1446.81
		0.1891	-19.4471	990.983	192.111	383.845	-8.70954	-0.169541	1032.41	1437.71
		0.1892	-26.1671	987.283	192.381	377.135	-8.40954	1.05046	1023.81	1430.71
		0.1893	-27.9971	1000.78	192.674	384.455	-8.40954	3.80046	1020.21	1422.41
		0.1894	-23.7271	990.683	192.991	378.665	-13.2895	-1.99954	1036.61	1418.51
		0.1895	-17.0071	990.983	193.333	376.825	-4.13954	5.63046	1047.61	1424.01
		0.1896	-14.5671	993.383	193.702	379.575	-4.13954	-7.79954	1038.51	1425.21
		0.1897	-13.3471	996.483	194.099	379.885	-8.70954	2.88046	1041.51	1420.61
		0.1898	-25.5571	997.383	194.524	377.435	-3.82954	-5.04954	1045.51	1422.71
		0.1899	-15.7871	997.983	194.979	392.085	-12.0695	-1.69954	1055.61	1424.61
		0.19	-16.0971	990.383	195.464	383.545	6.85046	-3.21954	1059.51	1421.51
		0.1901	-17.9271	985.783	195.979	387.815	-8.70954	4.71046	1050.11	1418.51
		0.1902	-18.5371	982.483	196.525	383.235	-5.96954	0.440459	1051.31	1412.11
		0.1903	-16.0971	986.083	197.102	389.955	-10.2395	3.19046	1044.31	1417.21
		0.1904	-13.9571	990.983	197.711	387.815	-2.60954	4.10046	1044.31	1431.01
		0.1905	-19.4471	990.683	198.35	388.735	-0.169541	3.80046	1040.61	1431.01
		0.1906	-25.5571	989.783	199.021	396.055	-6.57954	8.38046	1044.31	1424.61
		0.1907	-17.3171	980.583	199.723	403.685	-0.169541	1.36046	1045.51	1427.61
		0.1908	-15.4871	985.783	200.455	392.695	-4.13954	-0.469541	1045.21	1430.11
		0.1909	-20.6771	975.383	201.218	409.175	0.440459	-1.69954	1056.51	1430.71
		0.191	-25.5571	965.383	202.01	399.415	-5.35954	1.97046	1044.91	1434.91
		0.1911	-24.3371	971.783	202.831	405.825	5.32046	0.750459	1050.11	1428.51
		0.1912	-16.7071	967.783	203.68	410.395	-8.09954	5.32046	1056.21	1434.91
		0.1913	-17.3171	957.983	204.555	407.045	-3.82954	-0.169541	1050.71	1425.51
		0.1914	-21.8971	962.583	205.457	415.285	-8.09954	9.60046	1047.61	1440.11
		0.1915	-23.1171	959.883	206.381	421.695	-9.93954	-0.169541	1050.71	1418.81
		0.1916	-13.0471	957.983	207.329	416.195	-8.70954	0.440459	1051.91	1421.21
		0.1917	-14.5671	955.883	208.296	424.435	-13.2895	-5.96954	1045.81	1433.41
		0.1918	-18.5371	952.583	209.282	419.855	-1.69954	1.05046	1044.61	1428.81
		0.1919	-0.227084	963.483	210.284	417.115	-7.79954	8.68046	1040.91	1426.11
		0.192	-15.1771	960.783	211.3	424.435	-4.43954	0.750459	1038.81	1431.01
		0.1921	-19.7571	943.383	212.327	417.415	-3.52954	3.19046	1047.61	1433.41
		0.1922	-12.1271	948.583	213.364	426.875	-6.26954	2.27046	1037.31	1425.51
		0.1923	-22.5071	944.583	214.406	430.545	-6.57954	-3.82954	1032.11	1427.91
		0.1924	-13.6571	947.983	215.453	432.985	-2.91954	-5.96954	1029.61	1431.01
		0.1925	-14.5671	952.583	216.5	429.625	-4.43954	-5.65954	1029.31	1429.11
		0.1926	-19.4471	947.383	217.547	429.925	-0.169541	4.71046	1026.91	1426.41
		0.1927	-23.1171	938.183	218.59	437.865	-7.79954	0.140459	1024.71	1419.11
		0.1928	-17.6171	946.783	219.627	428.705	-11.7695	1.36046	1025.71	1424.91
		0.1929	-7.85708	949.183	220.656	425.045	-6.57954	5.63046	1017.11	1424.61
		0.193	-16.3971	954.683	221.674	429.625	-6.57954	3.49046	1030.51	1412.41
		0.1931	-24.0271	953.483	222.68	429.925	-8.70954	6.24046	1024.71	1421.51
		0.1932	-17.0071	960.783	223.673	429.315	-6.26954	-0.779541	1021.71	1414.21
		0.1933	-19.4471	961.683	224.649	430.845	-2.60954	0.140459	1023.51	1416.91
		0.1934	-18.5371	966.583	225.607	432.675	-4.74954	-0.469541	1027.51	1419.41
		0.1935	-17.3171	957.683	226.546	433.895	-11.1595	8.99046	1020.51	1425.21
		0.1936	-18.8371	960.483	227.464	440.915	-5.35954	-1.08954	1031.51	1427.91
		0.1937	-12.1271	960.483	228.36	443.665	-4.13954	0.440459	1016.21	1435.21
		0.1938	-10.2971	952.583	229.232	444.575	-11.7695	-0.469541	1026.91	1432.21
		0.1939	-19.7571	952.183	230.079	447.325	-3.82954	6.54046	1021.71	1443.51
		0.194	-9.37708	956.783	230.9	457.095	-10.8495	1.36046	1022.01	1439.51
		0.1941	-19.1471	956.483	231.693	457.095	-9.32954	0.750459	1021.71	1434.61
		0.1942	-19.1471	961.083	232.457	451.595	-4.13954	0.750459	1017.71	1434.31
		0.1943	-10.9071	951.583	233.191	458.005	-6.87954	8.68046	1017.41	1441.01
		0.1944	-21.2871	961.683	233.895	461.365	-9.01954	-7.18954	1024.11	1435.91
		0.1945	-15.4871	959.883	234.566	460.445	-9.32954	0.440459	1018.31	1440.41
		0.1946	-7.54708	959.883	235.204	450.375	-0.169541	-3.82954	1007.71	1431.01
		0.1947	-9.68708	949.183	235.808	458.005	-5.35954	8.38046	1009.81	1445.31
		0.1948	-15.4871	952.883	236.376	456.175	-9.62954	-0.169541	1014.41	1459.41
		0.1949	-12.7371	953.183	236.909	464.105	-2.91954	4.71046	1003.71	1447.81
		0.195	-18.5371	952.583	237.404	454.955	-7.18954	3.19046	1015.01	1447.21
		0.1951	-18.8371	950.083	237.862	456.785	-13.8995	5.63046	1014.11	1438.01
		0.1952	-18.5371	941.883	238.28	451.905	-8.40954	3.19046	1011.31	1446.51
		0.1953	-15.7871	952.183	238.66	450.075	-17.8695	5.63046	1010.11	1438.91
		0.1954	-12.1271	939.683	238.999	450.375	-11.4595	-2.91954	997.906	1437.41
		0.1955	-7.85708	947.383	239.297	452.515	-4.43954	10.2105	1004.01	1451.41
		0.1956	-13.9571	952.583	239.554	451.905	-11.1595	-0.469541	996.406	1452.31
		0.1957	-16.0971	941.883	239.769	452.515	-6.57954	-1.69954	986.906	1449.61
		0.1958	-9.37708	943.683	239.942	449.155	-4.74954	0.440459	985.406	1449.01
		0.1959	-13.0471	933.583	240.074	449.465	-12.3795	0.750459	991.806	1443.81
		0.196	-14.8771	942.783	240.163	442.135	-6.87954	3.49046	982.006	1438.91
		0.1961	-10.5971	946.083	240.212	434.815	-12.6795	0.440459	984.206	1441.01
		0.1962	-13.6571	952.583	240.221	440.915	-1.99954	-3.52954	985.706	1446.21
		0.1963	-19.7571	950.683	240.191	440.305	-19.6995	6.24046	981.406	1443.51
		0.1964	-16.7071	947.983	240.124	436.945	-21.5295	4.71046	983.506	1438.31
		0.1965	-10.9071	953.483	240.02	441.525	-19.6995	2.88046	983.206	1435.91
		0.1966	-20.0671	951.583	239.883	434.205	-21.2295	1.05046	982.006	1427.91
		0.1967	-8.76708	951.283	239.712	440.005	-21.2295	-2.30954	972.006	1434.91
		0.1968	-22.5071	952.583	239.511	441.835	-19.3995	5.02046	968.606	1433.41
		0.1969	-11.8271	956.183	239.281	442.135	-21.2295	-0.779541	974.406	1438.91
		0.197	-19.1471	945.783	239.024	431.155	-17.2595	1.36046	973.806	1434.61
		0.1971	-14.8771	949.483	238.742	432.375	-16.6495	-0.469541	968.606	1437.71
		0.1972	-2.66708	945.483	238.439	436.645	-13.5995	8.68046	964.306	1436.81
		0.1973	-21.8971	948.883	238.114	435.115	-25.1895	3.19046	966.506	1437.41
		0.1974	-16.0971	939.983	237.772	439.395	-16.3395	1.97046	961.306	1439.21
		0.1975	-19.1471	944.283	237.414	433.895	-5.35954	-4.13954	955.806	1438.01
		0.1976	-14.5671	940.983	237.041	438.165	-17.5595	3.49046	959.106	1441.01
		0.1977	-19.1471	933.283	236.657	443.665	-4.43954	6.24046	961.006	1439.51
		0.1978	-10.2971	943.683	236.263	447.015	-16.9495	7.15046	965.806	1430.41
		0.1979	-18.8371	943.383	235.86	454.345	-11.7695	-3.82954	973.506	1421.21
		0.198	-19.7571	933.283	235.452	453.125	-23.0595	3.49046	968.006	1415.71
		0.1981	-21.2871	934.183	235.039	450.375	-9.32954	8.07046	961.306	1425.81
		0.1982	-9.98708	947.083	234.625	451.595	-8.09954	5.63046	959.406	1420.91
		0.1983	-19.4471	950.983	234.211	471.735	-10.2395	-2.60954	953.606	1418.81
		0.1984	-18.2271	949.483	233.8	465.945	-3.21954	-0.779541	957.606	1425.21
		0.1985	-29.2171	947.383	233.392	457.095	-9.93954	5.02046	955.206	1421.21
		0.1986	-16.7071	939.983	232.991	464.105	-8.40954	3.80046	953.906	1417.91
		0.1987	-18.2271	937.583	232.597	464.415	-12.0695	7.76046	957.306	1439.21
		0.1988	-24.9471	939.683	232.214	458.925	-5.96954	8.99046	964.306	1437.71
		0.1989	-20.9771	931.483	231.841	462.885	-5.65954	6.85046	966.506	1442.91
		0.199	-23.1171	942.483	231.481	469.905	-9.01954	2.27046	965.206	1440.71
		0.1991	-17.6171	938.183	231.135	471.125	-6.57954	7.76046	961.906	1436.51
		0.1992	-23.1171	940.283	230.803	463.195	-14.8195	-7.18954	964.906	1443.51
		0.1993	-26.4671	942.483	230.487	466.555	-10.5495	-4.74954	962.506	1445.91
		0.1994	-22.8071	951.583	230.188	468.685	-3.82954	-6.57954	963.106	1444.41
		0.1995	-25.8571	941.583	229.904	469.905	-14.5095	-3.21954	971.006	1449.01
		0.1996	-23.4171	935.483	229.637	470.215	-4.43954	2.58046	975.906	1437.41
		0.1997	-20.0671	943.083	229.386	472.955	-6.26954	0.750459	973.206	1437.71
[truncated: 3,002 more rows]

## Sheet: Fig2E,F
Fig 2 E
Wildtype - Pref	Wildtype - Null	Gabra2KO - Pref	Gabra2KO - Null	ChR2 - Pref	ChR2 - Null	Gabra2KO/ChR2 - Pref	Gabra2KO/ChR2 - Null
240	885	475	1198	197	586	680	895
210	983	314	818	534	967	1430	1540
121	642	274	716	164	492	467	536
90	833	845	1560	137	302.5	199	184
200	1065	278	605	148	328	610	720
402	1086	221	464	124	280	457	495
				674	885	524	565
Fig 2 F
Wildtype - DSI	Gabra2KO - DSI	ChR2 - DSI	Gabra2KO/ChR2 - DSI
0.367119	0.273721	0.248477	0.0800835
0.303204	0.192159	0.196875	0.0288703
0.365704	0.276027	0.251819	0.0951356
0.29429	0.318649	0.29218	0.0705885
0.396568	0.253615	0.241648	0.0348334
0.265181	0.366977	0.220029	0.0459598
			0.157407
