# Supplementary material for: Retinal direction selectivity in the absence of asymmetric starburst amacrine cell responses
Source: eLife journal article supplement (doi:10.7554/elife.42392), 2019-02-04
Supplement: supp [file elife-42392-supp-v1.zip › elife_poa_e42392_Figure_3_source_data_1.xlsx]

## Sheet: Fig2A
	Fig3A
	time	PR-mediated spiking	PR block	ChR-mediated spiking
	0	6.1035	12.512	5.188
	0.0001	13.123	9.4604	2.4414
	0.0002	-5.4932	14.038	4.8828
	0.0003	6.1035	7.6294	1.8311
	0.0004	2.1362	13.428	-0.91553
	0.0005	1.8311	13.428	7.6294
	0.0006	7.6294	11.292	-4.8828
	0.0007	9.1553	11.597	-1.2207
	0.0008	4.2725	17.7	10.376
	0.0009	5.4932	20.142	3.6621
	0.001	2.1362	10.986	3.6621
	0.0011	5.4932	11.292	2.1362
	0.0012	3.6621	11.597	5.188
	0.0013	8.8501	7.3242	5.4932
	0.0014	5.7983	15.259	9.1553
	0.0015	1.5259	14.038	0.61035
	0.0016	4.5776	14.038	0
	0.0017	-3.0518	10.376	13.123
	0.0018	-1.5259	16.174	6.7139
	0.0019	7.019	13.733	7.019
	0.002	1.8311	13.428	5.4932
	0.0021	1.2207	11.292	6.4087
	0.0022	-14.343	18.311	0.91553
	0.0023	8.5449	8.8501	1.8311
	0.0024	3.6621	-1.2207	-1.2207
	0.0025	-0.91553	12.207	8.5449
	0.0026	0	7.9346	1.5259
	0.0027	2.4414	7.6294	1.5259
	0.0028	-1.2207	21.057	4.2725
	0.0029	3.6621	9.1553	5.188
	0.003	0.30518	12.817	2.4414
	0.0031	4.8828	10.376	9.4604
	0.0032	8.2397	14.038	2.4414
	0.0033	9.4604	11.902	10.376
	0.0034	8.8501	15.869	0
	0.0035	7.6294	8.5449	5.188
	0.0036	5.188	4.5776	4.8828
	0.0037	3.0518	4.8828	2.1362
	0.0038	10.986	12.817	0
	0.0039	2.7466	14.954	5.7983
	0.004	10.071	8.5449	0.91553
	0.0041	0.91553	16.479	6.4087
	0.0042	3.3569	9.1553	0
	0.0043	-1.5259	12.207	-1.8311
	0.0044	2.4414	17.395	-3.3569
	0.0045	2.4414	5.4932	7.9346
	0.0046	7.3242	8.2397	1.2207
	0.0047	5.4932	11.292	0.91553
	0.0048	7.9346	15.259	-1.5259
	0.0049	7.9346	17.7	7.3242
	0.005	4.5776	15.564	10.376
	0.0051	6.7139	-3.6621	2.7466
	0.0052	8.5449	4.5776	7.3242
	0.0053	10.681	5.4932	1.2207
	0.0054	2.4414	7.6294	9.7656
	0.0055	2.7466	7.019	6.1035
	0.0056	3.9673	6.4087	5.188
	0.0057	3.9673	12.207	7.9346
	0.0058	6.7139	11.902	-0.91553
	0.0059	1.5259	27.466	1.8311
	0.006	10.071	14.038	11.292
	0.0061	6.7139	8.2397	6.7139
	0.0062	-3.0518	9.1553	0.30518
	0.0063	-1.2207	12.512	7.019
	0.0064	5.188	21.667	-1.2207
	0.0065	-0.30518	6.1035	-1.2207
	0.0066	8.2397	9.7656	3.9673
	0.0067	1.5259	6.4087	4.5776
	0.0068	1.8311	7.9346	1.2207
	0.0069	13.428	14.343	3.0518
	0.007	11.292	17.395	-0.91553
	0.0071	10.986	16.174	7.3242
	0.0072	10.376	12.817	3.9673
	0.0073	5.7983	14.038	8.8501
	0.0074	4.2725	8.2397	9.1553
	0.0075	8.5449	17.09	3.9673
	0.0076	1.2207	14.954	7.3242
	0.0077	2.4414	8.8501	14.038
	0.0078	11.292	16.479	3.6621
	0.0079	2.1362	30.518	-0.61035
	0.008	10.376	8.2397	2.1362
	0.0081	3.9673	15.564	3.6621
	0.0082	1.5259	13.733	7.3242
	0.0083	7.6294	10.071	10.071
	0.0084	7.9346	16.785	15.564
	0.0085	23.804	13.123	4.2725
	0.0086	10.376	7.9346	4.8828
	0.0087	9.1553	18.921	-7.019
	0.0088	12.207	15.259	3.6621
	0.0089	7.3242	18.311	10.071
	0.009	3.6621	13.733	5.188
	0.0091	-0.61035	13.428	2.7466
	0.0092	10.376	19.836	2.7466
	0.0093	12.207	14.954	1.5259
	0.0094	11.597	11.292	6.4087
	0.0095	9.4604	18.311	5.188
	0.0096	10.681	20.142	2.7466
	0.0097	10.681	22.278	6.1035
	0.0098	10.071	14.038	0.61035
	0.0099	9.4604	14.038	10.376
	0.01	15.564	11.597	1.2207
	0.0101	4.2725	16.785	5.4932
	0.0102	-1.2207	12.207	-0.30518
	0.0103	14.343	12.512	10.986
	0.0104	10.681	19.836	-4.8828
	0.0105	12.512	14.038	-7.6294
	0.0106	4.2725	16.479	10.071
	0.0107	11.597	18.921	4.2725
	0.0108	6.7139	7.9346	9.4604
	0.0109	3.0518	19.836	8.5449
	0.011	14.648	16.174	4.2725
	0.0111	2.1362	18.311	8.2397
	0.0112	1.5259	11.597	4.2725
	0.0113	7.6294	11.902	5.4932
	0.0114	7.9346	7.3242	0.61035
	0.0115	9.4604	14.954	9.4604
	0.0116	9.1553	3.6621	7.6294
	0.0117	9.4604	12.512	1.5259
	0.0118	8.8501	10.071	3.6621
	0.0119	8.2397	14.343	5.4932
	0.012	8.5449	22.888	3.6621
	0.0121	8.5449	16.479	11.292
	0.0122	16.785	16.785	5.188
	0.0123	5.188	21.057	7.019
	0.0124	6.7139	18.616	4.5776
	0.0125	5.188	15.259	7.6294
	0.0126	11.292	13.123	9.7656
	0.0127	11.292	8.8501	2.4414
	0.0128	16.174	13.428	5.4932
	0.0129	11.597	15.564	8.2397
	0.013	10.986	16.785	1.8311
	0.0131	15.259	9.7656	3.6621
	0.0132	13.123	14.648	5.7983
	0.0133	7.3242	14.038	-0.30518
	0.0134	0	15.869	0
	0.0135	24.109	0	2.1362
	0.0136	6.7139	19.226	0.61035
	0.0137	4.5776	17.395	8.2397
	0.0138	10.681	18.921	10.376
	0.0139	12.512	18.921	6.1035
	0.014	5.7983	11.597	6.1035
	0.0141	10.986	5.4932	2.7466
	0.0142	8.5449	7.6294	1.2207
	0.0143	5.188	21.667	3.9673
	0.0144	7.6294	3.9673	4.8828
	0.0145	0.30518	13.428	9.1553
	0.0146	6.7139	13.428	3.0518
	0.0147	4.8828	9.1553	6.1035
	0.0148	4.8828	11.902	9.7656
	0.0149	10.986	6.4087	3.3569
	0.015	11.292	15.869	4.5776
	0.0151	8.5449	13.428	-0.91553
	0.0152	10.681	10.071	-4.2725
	0.0153	5.7983	-0.61035	-4.2725
	0.0154	6.1035	9.1553	9.1553
	0.0155	12.817	10.071	0.30518
	0.0156	-1.2207	7.3242	4.8828
	0.0157	15.259	9.1553	7.6294
	0.0158	3.0518	6.4087	3.0518
	0.0159	7.3242	14.648	2.4414
	0.016	4.5776	5.4932	1.8311
	0.0161	1.8311	14.343	6.4087
	0.0162	11.902	19.836	6.1035
	0.0163	10.071	8.8501	-2.1362
	0.0164	7.6294	14.038	4.8828
	0.0165	11.902	10.071	1.5259
	0.0166	10.376	10.986	2.7466
	0.0167	6.4087	10.376	1.5259
	0.0168	9.4604	8.8501	1.8311
	0.0169	7.019	16.174	-5.4932
	0.017	6.4087	16.174	7.9346
	0.0171	11.902	14.648	-9.1553
	0.0172	3.3569	12.817	10.986
	0.0173	5.7983	11.902	-4.2725
	0.0174	0.30518	15.259	3.9673
	0.0175	1.8311	10.376	2.1362
	0.0176	9.4604	14.038	6.7139
	0.0177	3.3569	14.954	1.5259
	0.0178	0	13.733	3.6621
	0.0179	7.6294	6.1035	4.5776
	0.018	2.1362	24.109	3.9673
	0.0181	7.3242	14.648	5.4932
	0.0182	0	9.1553	6.4087
	0.0183	7.3242	8.8501	-1.5259
	0.0184	2.4414	8.2397	3.9673
	0.0185	-1.8311	16.479	5.188
	0.0186	6.1035	20.752	5.188
	0.0187	0.91553	11.597	7.019
	0.0188	3.3569	10.681	-7.019
	0.0189	-3.6621	20.752	6.4087
	0.019	0.30518	7.9346	1.5259
	0.0191	9.1553	12.817	7.9346
	0.0192	1.5259	8.5449	6.4087
	0.0193	8.5449	19.836	-0.91553
	0.0194	7.3242	7.9346	4.2725
	0.0195	2.1362	12.817	3.0518
	0.0196	1.5259	17.7	4.2725
	0.0197	1.2207	10.986	6.7139
	0.0198	0.30518	20.752	0
	0.0199	1.2207	19.226	0.30518
	0.02	-3.3569	19.226	9.7656
	0.0201	-0.30518	10.376	7.019
	0.0202	0	8.5449	3.3569
	0.0203	6.4087	5.4932	-1.8311
	0.0204	2.1362	21.667	6.1035
	0.0205	2.1362	13.733	3.0518
	0.0206	11.902	15.869	7.3242
	0.0207	5.188	16.174	0.91553
	0.0208	5.4932	12.207	9.7656
	0.0209	3.0518	11.597	6.7139
	0.021	4.5776	12.207	4.5776
	0.0211	0	23.499	9.7656
	0.0212	-3.6621	12.512	6.7139
	0.0213	2.1362	18.005	2.7466
	0.0214	4.5776	10.376	3.0518
	0.0215	2.4414	6.7139	5.188
	0.0216	8.8501	14.038	3.9673
	0.0217	7.3242	16.174	7.3242
	0.0218	3.3569	6.4087	4.5776
	0.0219	4.8828	9.7656	6.1035
	0.022	2.1362	8.5449	1.8311
	0.0221	7.9346	13.733	7.6294
	0.0222	0.61035	7.019	4.8828
	0.0223	6.4087	7.3242	5.188
	0.0224	4.8828	7.9346	3.9673
	0.0225	-2.4414	10.986	0.30518
	0.0226	6.7139	16.174	-7.3242
	0.0227	7.3242	11.292	7.019
	0.0228	4.8828	21.362	10.071
	0.0229	3.0518	14.343	0.91553
	0.023	9.1553	8.2397	-1.5259
	0.0231	7.3242	14.648	-1.5259
	0.0232	1.8311	6.7139	-0.61035
	0.0233	0	11.902	6.1035
	0.0234	2.4414	12.207	8.8501
	0.0235	9.4604	16.785	7.019
	0.0236	-1.2207	20.752	5.7983
	0.0237	9.4604	10.071	2.4414
	0.0238	10.071	10.071	5.4932
	0.0239	7.9346	14.648	7.019
	0.024	5.4932	7.019	7.3242
	0.0241	4.5776	5.4932	2.4414
	0.0242	-4.2725	14.648	1.8311
	0.0243	11.292	10.681	4.8828
	0.0244	6.4087	8.8501	6.1035
	0.0245	1.2207	10.071	5.7983
	0.0246	1.2207	13.733	1.2207
	0.0247	-0.30518	16.785	3.3569
	0.0248	8.8501	10.376	-3.3569
	0.0249	-0.61035	10.681	3.3569
	0.025	5.188	10.376	8.5449
	0.0251	8.5449	13.123	0.61035
	0.0252	10.071	14.343	8.2397
	0.0253	7.3242	4.2725	0.30518
	0.0254	14.648	14.954	-2.1362
	0.0255	5.7983	10.986	-8.5449
	0.0256	13.123	5.188	7.3242
	0.0257	6.1035	12.817	5.188
	0.0258	6.1035	10.681	4.8828
	0.0259	5.7983	8.2397	6.7139
	0.026	7.019	8.2397	5.188
	0.0261	11.902	14.343	6.4087
	0.0262	5.188	8.5449	7.9346
	0.0263	7.6294	14.954	12.207
	0.0264	7.6294	17.395	1.8311
	0.0265	4.8828	12.512	2.1362
	0.0266	16.479	16.785	6.1035
	0.0267	3.6621	5.7983	1.8311
	0.0268	7.3242	10.071	1.2207
	0.0269	8.8501	15.869	3.6621
	0.027	12.512	18.311	4.8828
	0.0271	4.8828	19.836	6.7139
	0.0272	16.479	7.6294	2.1362
	0.0273	5.188	9.1553	2.7466
	0.0274	3.6621	20.752	3.6621
	0.0275	11.292	15.259	-1.5259
	0.0276	12.512	15.259	5.7983
	0.0277	4.2725	14.954	0.61035
	0.0278	10.071	4.5776	2.7466
	0.0279	19.531	8.8501	10.071
	0.028	7.6294	8.8501	6.7139
	0.0281	9.4604	6.1035	9.7656
	0.0282	10.681	7.3242	4.2725
	0.0283	12.817	9.4604	2.1362
	0.0284	13.123	21.362	2.4414
	0.0285	14.954	20.447	0.91553
	0.0286	10.986	7.3242	8.2397
	0.0287	15.259	11.902	4.2725
	0.0288	10.986	14.954	10.681
	0.0289	19.531	9.4604	3.3569
	0.029	7.6294	20.752	5.7983
	0.0291	18.616	15.564	5.4932
	0.0292	10.376	11.902	-0.61035
	0.0293	9.7656	9.7656	6.4087
	0.0294	8.8501	10.376	2.4414
	0.0295	10.376	14.648	0.91553
	0.0296	13.123	17.7	2.1362
	0.0297	15.869	8.5449	0
	0.0298	16.785	12.512	2.1362
	0.0299	13.428	12.817	1.2207
	0.03	13.733	16.174	6.7139
	0.0301	0	14.343	8.5449
	0.0302	9.7656	12.207	9.4604
	0.0303	9.7656	12.512	0.61035
	0.0304	4.2725	18.311	2.4414
	0.0305	8.2397	18.921	0.61035
	0.0306	14.038	8.2397	1.5259
	0.0307	3.9673	14.343	7.9346
	0.0308	4.2725	10.681	4.8828
	0.0309	18.005	7.3242	3.3569
	0.031	3.3569	7.019	7.6294
	0.0311	5.188	16.174	-0.91553
	0.0312	-0.91553	8.5449	4.8828
	0.0313	6.1035	9.1553	11.292
	0.0314	1.5259	12.207	5.7983
	0.0315	9.4604	11.597	14.343
	0.0316	8.8501	14.648	4.2725
	0.0317	4.5776	11.902	6.4087
	0.0318	2.1362	8.5449	5.7983
	0.0319	7.9346	16.174	2.7466
	0.032	6.7139	6.7139	8.8501
	0.0321	7.6294	12.817	2.4414
	0.0322	11.292	11.902	2.1362
	0.0323	7.3242	13.428	1.5259
	0.0324	9.7656	11.902	2.4414
	0.0325	7.9346	10.071	6.1035
	0.0326	7.3242	2.1362	2.1362
	0.0327	8.2397	18.311	6.4087
	0.0328	1.2207	18.616	3.6621
	0.0329	10.376	-1.5259	4.5776
	0.033	10.376	16.479	2.7466
	0.0331	5.7983	16.174	1.2207
	0.0332	9.1553	12.817	-2.7466
	0.0333	9.7656	16.174	3.6621
	0.0334	-0.30518	9.7656	-1.5259
	0.0335	0.91553	12.817	0
	0.0336	3.0518	13.123	7.019
	0.0337	8.2397	11.292	5.7983
	0.0338	10.986	13.123	-5.7983
	0.0339	8.2397	11.292	8.2397
	0.034	4.5776	11.597	5.4932
	0.0341	4.2725	9.4604	3.0518
	0.0342	-0.30518	13.123	3.6621
	0.0343	6.1035	10.071	0.91553
	0.0344	6.1035	12.207	8.8501
	0.0345	4.5776	9.1553	3.9673
	0.0346	0.61035	10.071	-2.4414
	0.0347	2.4414	7.9346	1.5259
	0.0348	7.6294	5.188	6.7139
	0.0349	4.8828	11.292	0.61035
	0.035	1.8311	12.817	4.8828
	0.0351	8.8501	10.376	8.8501
	0.0352	1.5259	18.311	-0.30518
	0.0353	0	13.733	8.5449
	0.0354	1.8311	11.902	1.2207
	0.0355	12.817	10.376	3.6621
	0.0356	4.8828	18.921	-4.5776
	0.0357	-1.2207	10.681	4.5776
	0.0358	4.5776	18.616	4.5776
	0.0359	6.7139	0	3.0518
	0.036	4.8828	11.597	2.7466
	0.0361	5.188	9.1553	0.91553
	0.0362	3.6621	12.512	5.7983
	0.0363	-6.4087	23.193	-0.30518
	0.0364	-1.2207	9.4604	2.7466
	0.0365	6.7139	12.817	4.2725
	0.0366	8.5449	3.0518	0.61035
	0.0367	-2.4414	7.9346	3.9673
	0.0368	2.7466	7.019	3.6621
	0.0369	4.2725	21.667	10.071
	0.037	2.1362	7.3242	4.2725
	0.0371	1.8311	7.3242	1.5259
	0.0372	2.1362	13.733	6.1035
	0.0373	11.292	6.1035	7.9346
	0.0374	7.019	10.986	2.1362
	0.0375	3.0518	10.071	3.6621
	0.0376	8.2397	14.343	10.071
	0.0377	4.5776	19.531	0
	0.0378	7.9346	12.207	3.0518
	0.0379	4.5776	13.733	-1.2207
	0.038	3.0518	9.1553	8.2397
	0.0381	4.2725	8.8501	0.30518
	0.0382	10.071	8.2397	-0.30518
	0.0383	7.3242	13.428	6.7139
	0.0384	2.7466	9.1553	0
	0.0385	8.2397	21.362	5.4932
	0.0386	10.681	10.376	6.7139
	0.0387	0.61035	5.4932	5.188
	0.0388	3.3569	1.2207	-3.0518
	0.0389	3.6621	10.986	9.7656
	0.039	9.7656	6.1035	0.61035
	0.0391	3.9673	17.7	3.6621
	0.0392	9.4604	15.564	-0.30518
	0.0393	5.188	10.986	-6.1035
	0.0394	8.8501	16.174	4.8828
	0.0395	12.512	16.479	0
	0.0396	8.8501	13.733	11.597
	0.0397	11.597	12.207	-1.2207
	0.0398	10.376	7.6294	1.2207
	0.0399	1.5259	7.9346	0.91553
	0.04	6.7139	8.5449	-1.5259
	0.0401	4.8828	10.986	12.512
	0.0402	1.5259	18.921	3.9673
	0.0403	2.1362	19.226	8.2397
	0.0404	6.7139	11.292	2.4414
	0.0405	4.2725	17.09	7.3242
	0.0406	11.597	13.123	6.4087
	0.0407	2.4414	10.986	4.5776
	0.0408	6.4087	13.428	2.7466
	0.0409	-0.30518	22.278	11.292
	0.041	3.9673	12.817	6.7139
	0.0411	4.8828	10.376	4.8828
	0.0412	3.9673	7.3242	7.019
	0.0413	5.188	14.343	1.8311
	0.0414	3.6621	16.174	6.4087
	0.0415	0	14.343	7.9346
	0.0416	4.5776	8.8501	7.019
	0.0417	4.5776	10.986	8.2397
	0.0418	1.8311	17.395	8.5449
	0.0419	11.902	12.207	-0.61035
	0.042	7.6294	5.188	0.30518
	0.0421	9.1553	18.921	17.09
	0.0422	10.681	9.1553	1.5259
	0.0423	14.648	18.005	2.4414
	0.0424	7.6294	19.531	4.8828
	0.0425	7.9346	8.5449	4.5776
	0.0426	7.3242	9.1553	14.343
	0.0427	6.7139	14.648	-1.2207
	0.0428	3.6621	18.005	-3.6621
	0.0429	10.071	1.2207	5.188
	0.043	7.6294	3.9673	8.8501
	0.0431	0.91553	13.428	0.91553
	0.0432	17.395	6.7139	2.7466
	0.0433	5.7983	15.869	4.8828
	0.0434	5.4932	7.3242	9.4604
	0.0435	13.428	6.4087	5.7983
	0.0436	7.3242	14.343	4.8828
	0.0437	1.2207	19.226	10.681
	0.0438	7.9346	11.292	14.343
	0.0439	13.733	6.1035	7.3242
	0.044	5.188	15.869	4.5776
	0.0441	10.071	16.479	6.1035
	0.0442	7.9346	18.311	2.7466
	0.0443	18.311	2.7466	4.2725
	0.0444	14.954	13.733	2.4414
	0.0445	12.207	13.123	2.7466
	0.0446	9.4604	9.1553	0
	0.0447	12.512	15.259	0
	0.0448	3.0518	14.648	6.1035
	0.0449	4.5776	10.986	5.7983
	0.045	1.5259	4.5776	-5.4932
	0.0451	6.1035	10.681	14.038
	0.0452	6.7139	11.902	5.4932
	0.0453	0	19.531	4.8828
	0.0454	9.4604	11.902	7.019
	0.0455	12.817	1.5259	9.1553
	0.0456	10.376	16.785	0.61035
	0.0457	5.188	13.733	5.7983
	0.0458	12.817	14.648	12.512
	0.0459	12.512	5.7983	2.4414
	0.046	10.376	10.986	0.61035
	0.0461	11.292	6.1035	0.91553
	0.0462	7.9346	11.597	3.6621
	0.0463	12.207	13.733	8.2397
	0.0464	10.986	7.3242	1.8311
	0.0465	12.817	17.395	0.91553
	0.0466	10.681	13.123	-3.6621
	0.0467	10.071	14.648	6.1035
	0.0468	13.123	6.7139	8.2397
	0.0469	22.278	10.986	0.30518
	0.047	14.648	18.616	2.7466
	0.0471	12.817	18.616	0
	0.0472	11.902	16.479	4.8828
	0.0473	3.6621	14.954	6.1035
	0.0474	6.7139	17.09	-0.91553
	0.0475	6.7139	16.785	8.5449
	0.0476	6.7139	15.259	1.8311
	0.0477	8.8501	12.207	1.8311
	0.0478	16.479	8.2397	7.019
	0.0479	17.09	11.292	6.4087
	0.048	18.005	8.5449	9.7656
	0.0481	13.428	8.2397	5.188
	0.0482	14.954	18.005	11.902
	0.0483	5.4932	16.479	4.2725
	0.0484	4.8828	1.8311	0.30518
	0.0485	9.4604	6.4087	-0.30518
	0.0486	6.7139	16.174	4.8828
	0.0487	6.4087	19.531	7.6294
	0.0488	2.1362	14.648	0.30518
	0.0489	3.3569	8.5449	3.3569
	0.049	8.8501	6.7139	8.5449
	0.0491	6.4087	4.5776	0.30518
	0.0492	7.019	13.123	2.7466
	0.0493	8.5449	21.057	9.1553
	0.0494	15.259	12.512	6.1035
	0.0495	7.9346	4.5776	9.1553
	0.0496	13.123	-1.5259	10.071
	0.0497	1.5259	20.752	7.6294
	0.0498	8.8501	15.564	2.1362
	0.0499	11.597	12.512	4.8828
	0.05	3.0518	19.531	3.6621
	0.0501	7.9346	16.174	8.2397
	0.0502	-9.1553	8.8501	2.1362
	0.0503	10.071	10.071	3.3569
	0.0504	2.7466	9.7656	11.902
	0.0505	7.019	17.09	0.30518
	0.0506	2.1362	13.123	-0.91553
	0.0507	14.038	15.564	5.7983
	0.0508	7.9346	6.4087	0
	0.0509	7.019	8.8501	1.8311
	0.051	1.5259	8.5449	9.4604
	0.0511	1.8311	13.123	3.3569
	0.0512	-9.4604	4.8828	1.2207
	0.0513	-0.61035	0.91553	1.8311
	0.0514	1.2207	16.785	5.4932
	0.0515	2.4414	18.311	5.7983
	0.0516	7.019	10.071	0.61035
	0.0517	9.4604	11.292	5.188
	0.0518	3.9673	6.1035	0.30518
	0.0519	-1.2207	4.5776	7.6294
	0.052	3.9673	12.207	2.1362
	0.0521	-5.4932	18.311	14.343
	0.0522	2.4414	16.174	12.207
	0.0523	15.564	17.395	2.1362
	0.0524	7.019	11.292	4.5776
	0.0525	5.7983	6.7139	4.8828
	0.0526	-3.9673	9.4604	-0.91553
	0.0527	0.61035	7.019	-0.91553
	0.0528	4.8828	10.376	4.5776
	0.0529	-0.61035	8.8501	1.8311
	0.053	2.7466	17.7	1.8311
	0.0531	5.7983	10.071	4.8828
	0.0532	9.7656	15.869	4.8828
	0.0533	6.4087	18.921	12.512
	0.0534	8.5449	11.597	-0.30518
	0.0535	11.292	12.512	4.2725
	0.0536	1.5259	10.681	5.188
	0.0537	3.9673	14.648	5.7983
	0.0538	-5.4932	10.071	5.188
	0.0539	3.9673	7.019	0
	0.054	6.4087	7.9346	2.7466
	0.0541	3.9673	10.376	7.9346
	0.0542	-1.5259	13.733	5.188
	0.0543	0.61035	8.5449	2.1362
	0.0544	-0.91553	16.479	5.4932
	0.0545	9.4604	7.6294	3.3569
	0.0546	2.7466	12.207	1.8311
	0.0547	3.9673	14.954	6.4087
	0.0548	-0.30518	12.207	0
	0.0549	0.91553	4.8828	2.1362
	0.055	10.376	5.188	6.1035
	0.0551	7.9346	-2.4414	4.8828
	0.0552	5.188	13.733	2.4414
	0.0553	12.207	17.09	4.2725
	0.0554	-0.61035	10.986	6.1035
	0.0555	3.0518	12.817	3.9673
	0.0556	5.188	3.3569	7.6294
	0.0557	-0.61035	12.512	1.2207
	0.0558	7.6294	17.395	4.5776
	0.0559	2.7466	24.109	3.0518
	0.056	6.4087	9.7656	7.019
	0.0561	14.343	10.681	4.2725
	0.0562	1.2207	13.428	-2.7466
	0.0563	2.4414	16.785	1.8311
	0.0564	4.5776	10.681	0.61035
	0.0565	6.7139	13.123	4.8828
	0.0566	2.1362	16.174	0.91553
	0.0567	12.817	12.207	0.30518
	0.0568	0	14.343	3.0518
	0.0569	1.5259	9.1553	7.9346
	0.057	7.3242	8.2397	5.188
	0.0571	6.4087	5.4932	5.7983
	0.0572	11.597	13.733	7.6294
	0.0573	-1.2207	12.207	6.4087
	0.0574	7.3242	18.005	-2.4414
	0.0575	-1.8311	14.343	-1.2207
	0.0576	8.5449	15.564	2.7466
	0.0577	3.3569	12.207	1.8311
	0.0578	7.6294	15.259	-2.4414
	0.0579	7.019	26.855	-1.2207
	0.058	8.8501	11.597	4.8828
	0.0581	7.9346	14.038	7.6294
	0.0582	1.5259	8.8501	12.512
	0.0583	2.4414	10.986	7.3242
	0.0584	15.564	12.207	1.5259
	0.0585	11.902	14.954	9.7656
	0.0586	3.9673	10.986	1.8311
	0.0587	16.479	20.142	0.91553
	0.0588	4.2725	15.259	13.123
	0.0589	11.902	9.4604	5.188
	0.059	9.1553	10.681	0.61035
	0.0591	8.8501	11.902	9.7656
	0.0592	3.9673	14.038	6.1035
	0.0593	14.648	11.597	12.512
	0.0594	7.6294	15.259	2.1362
	0.0595	14.343	12.512	-2.1362
	0.0596	8.5449	16.785	2.1362
	0.0597	4.5776	16.785	-3.0518
	0.0598	12.817	6.1035	3.6621
	0.0599	8.5449	17.7	2.7466
	0.06	6.7139	10.681	8.2397
	0.0601	8.8501	8.8501	6.7139
	0.0602	2.4414	8.2397	8.8501
	0.0603	5.4932	13.428	0
	0.0604	11.597	10.986	4.8828
	0.0605	3.0518	13.123	10.986
	0.0606	10.071	11.597	7.3242
	0.0607	6.4087	13.733	9.7656
	0.0608	6.1035	11.292	8.5449
	0.0609	14.343	25.024	2.1362
	0.061	13.733	12.512	-2.4414
	0.0611	3.6621	14.648	4.8828
	0.0612	8.5449	13.123	5.7983
	0.0613	10.071	5.4932	1.5259
	0.0614	14.343	15.564	8.8501
	0.0615	3.0518	8.5449	4.2725
	0.0616	4.5776	6.7139	3.9673
	0.0617	5.188	14.038	8.2397
	0.0618	5.7983	9.1553	0.61035
	0.0619	4.2725	11.902	1.5259
	0.062	8.2397	8.5449	6.7139
	0.0621	6.7139	20.752	1.5259
	0.0622	0.61035	11.292	-0.30518
	0.0623	2.4414	8.8501	-1.5259
	0.0624	3.0518	8.8501	7.3242
	0.0625	11.597	16.174	5.4932
	0.0626	13.733	10.986	2.1362
	0.0627	16.479	8.8501	3.3569
	0.0628	8.2397	10.681	4.8828
	0.0629	15.564	17.7	7.019
	0.063	8.8501	13.733	5.7983
	0.0631	9.7656	5.188	0.91553
	0.0632	15.564	18.005	-3.6621
	0.0633	11.292	18.005	4.2725
	0.0634	9.1553	20.752	1.8311
	0.0635	6.4087	9.7656	1.8311
	0.0636	8.2397	12.817	1.8311
	0.0637	9.7656	15.869	4.8828
	0.0638	11.597	14.954	0
	0.0639	5.188	17.395	1.5259
	0.064	2.4414	11.292	2.1362
	0.0641	11.292	13.123	2.7466
	0.0642	6.7139	11.597	0.91553
	0.0643	4.2725	7.019	14.648
	0.0644	6.7139	10.376	2.7466
	0.0645	8.8501	9.7656	6.1035
	0.0646	6.7139	11.597	6.1035
	0.0647	10.986	11.597	5.4932
	0.0648	4.8828	19.226	3.9673
	0.0649	10.376	18.005	4.2725
	0.065	12.207	6.1035	6.4087
	0.0651	11.902	3.6621	-6.4087
	0.0652	7.9346	0.91553	5.4932
	0.0653	7.3242	14.648	5.188
	0.0654	12.207	22.888	4.2725
	0.0655	-0.61035	14.038	-0.61035
	0.0656	9.7656	17.7	-3.6621
	0.0657	3.0518	10.986	8.2397
	0.0658	13.123	12.207	3.6621
	0.0659	3.9673	14.648	4.5776
	0.066	9.1553	8.2397	5.188
	0.0661	11.292	5.7983	-1.2207
	0.0662	4.8828	16.785	0.61035
	0.0663	7.9346	12.512	2.4414
	0.0664	14.648	7.9346	6.7139
	0.0665	3.0518	4.2725	1.8311
	0.0666	13.428	11.292	3.0518
	0.0667	9.1553	9.7656	0.91553
	0.0668	6.1035	12.207	8.2397
	0.0669	0.30518	13.733	6.4087
	0.067	0.61035	19.531	2.1362
	0.0671	10.376	16.174	-3.3569
	0.0672	5.4932	8.2397	12.207
	0.0673	4.2725	9.1553	6.4087
	0.0674	3.6621	7.6294	3.0518
	0.0675	9.1553	14.038	5.188
	0.0676	-3.0518	14.343	7.9346
	0.0677	10.071	12.512	2.7466
	0.0678	6.1035	6.1035	7.3242
	0.0679	4.8828	16.174	2.7466
	0.068	4.8828	17.395	2.1362
	0.0681	3.9673	13.123	2.4414
	0.0682	9.1553	7.9346	7.6294
	0.0683	3.9673	9.1553	7.6294
	0.0684	0	10.986	10.071
	0.0685	8.2397	10.376	7.3242
	0.0686	3.0518	10.681	5.7983
	0.0687	1.8311	10.071	0
	0.0688	4.8828	11.597	3.6621
	0.0689	-5.7983	4.2725	0.61035
	0.069	11.902	15.869	-2.7466
	0.0691	-7.3242	5.7983	13.428
	0.0692	3.3569	13.428	3.0518
	0.0693	5.4932	25.33	5.188
	0.0694	5.4932	13.123	-0.30518
	0.0695	10.986	15.869	-1.2207
	0.0696	5.7983	17.09	-3.6621
	0.0697	10.986	10.681	-2.4414
	0.0698	0.91553	14.038	1.8311
	0.0699	2.4414	16.479	1.2207
	0.07	-2.7466	13.733	8.8501
	0.0701	4.8828	10.376	-1.5259
	0.0702	3.6621	8.2397	6.1035
	0.0703	-3.0518	11.597	4.5776
	0.0704	1.5259	10.376	-1.5259
	0.0705	6.4087	14.648	3.0518
	0.0706	-13.733	10.071	1.5259
	0.0707	8.2397	7.9346	5.7983
	0.0708	3.9673	7.019	7.9346
	0.0709	6.1035	18.616	13.733
	0.071	4.2725	17.395	2.7466
	0.0711	3.3569	17.395	3.6621
	0.0712	3.3569	8.8501	7.019
	0.0713	12.512	17.09	6.7139
	0.0714	9.7656	17.395	3.6621
	0.0715	1.2207	8.5449	3.6621
	0.0716	-2.7466	6.7139	9.7656
	0.0717	4.2725	14.038	1.5259
	0.0718	12.512	8.8501	8.5449
	0.0719	-1.8311	18.311	4.2725
	0.072	4.5776	10.681	4.2725
	0.0721	10.681	5.188	11.902
	0.0722	4.8828	9.7656	0.91553
	0.0723	7.6294	9.1553	5.7983
	0.0724	3.0518	17.395	5.188
	0.0725	3.6621	10.376	1.2207
	0.0726	4.2725	11.902	7.6294
	0.0727	3.0518	4.5776	10.681
	0.0728	-0.61035	11.597	10.681
	0.0729	2.4414	20.752	0.91553
	0.073	6.4087	7.3242	2.4414
	0.0731	3.0518	16.785	-0.61035
	0.0732	5.7983	8.8501	-3.6621
	0.0733	10.986	9.1553	2.7466
	0.0734	5.7983	18.005	4.2725
	0.0735	8.8501	12.207	-4.2725
	0.0736	10.681	16.174	7.6294
	0.0737	5.188	14.954	2.7466
	0.0738	20.752	6.1035	3.6621
	0.0739	5.188	7.019	4.2725
	0.074	6.1035	10.986	-1.2207
	0.0741	3.6621	14.343	5.7983
	0.0742	9.7656	12.207	5.7983
	0.0743	4.2725	14.038	5.4932
	0.0744	4.8828	14.038	10.376
	0.0745	14.038	3.3569	8.8501
	0.0746	2.4414	23.804	1.2207
	0.0747	13.123	12.817	3.6621
	0.0748	7.019	6.7139	8.5449
	0.0749	3.9673	10.681	3.9673
	0.075	14.648	20.752	4.8828
	0.0751	8.8501	19.226	4.8828
	0.0752	15.564	16.174	4.2725
	0.0753	10.376	13.428	3.6621
	0.0754	5.188	17.7	-8.2397
	0.0755	8.2397	11.597	7.019
	0.0756	4.8828	10.376	3.6621
	0.0757	11.292	12.512	7.6294
	0.0758	6.1035	12.817	5.4932
	0.0759	9.1553	11.597	4.8828
	0.076	5.4932	9.7656	3.6621
	0.0761	9.1553	2.7466	3.6621
	0.0762	7.3242	8.2397	6.7139
	0.0763	3.9673	21.057	2.7466
	0.0764	8.8501	11.902	6.4087
	0.0765	10.376	16.479	5.188
	0.0766	9.7656	16.479	9.7656
	0.0767	5.4932	6.4087	1.8311
	0.0768	4.8828	11.597	2.7466
	0.0769	9.7656	9.1553	4.5776
	0.077	10.071	0.91553	8.5449
	0.0771	9.4604	12.817	8.8501
	0.0772	0	19.531	-4.5776
	0.0773	5.4932	18.921	7.019
	0.0774	8.8501	10.376	3.0518
	0.0775	3.6621	10.681	0.61035
	0.0776	7.019	21.973	11.902
	0.0777	0.91553	13.123	1.2207
	0.0778	7.9346	10.986	7.9346
	0.0779	9.1553	24.719	0
	0.078	8.8501	9.4604	1.8311
	0.0781	14.038	12.207	0.91553
	0.0782	13.123	8.8501	5.4932
	0.0783	16.174	19.836	11.597
	0.0784	16.479	12.817	4.5776
	0.0785	3.3569	17.7	-3.3569
	0.0786	12.817	10.376	8.2397
	0.0787	12.817	13.428	7.019
	0.0788	11.597	13.733	5.188
	0.0789	10.986	11.902	3.3569
	0.079	12.817	14.038	8.8501
	0.0791	9.4604	16.785	3.3569
	0.0792	10.986	22.888	3.9673
	0.0793	4.8828	18.616	0
	0.0794	15.259	9.7656	3.9673
	0.0795	16.174	11.597	3.6621
	0.0796	10.986	6.1035	4.5776
	0.0797	12.207	10.986	11.292
	0.0798	3.9673	21.362	7.019
	0.0799	13.733	13.428	8.8501
	0.08	17.09	14.038	4.8828
	0.0801	1.8311	18.311	3.6621
	0.0802	12.512	18.311	12.207
	0.0803	3.6621	7.3242	5.188
	0.0804	9.7656	19.226	2.1362
	0.0805	12.207	16.174	4.8828
	0.0806	15.564	13.733	9.1553
	0.0807	0.91553	17.395	6.4087
	0.0808	7.3242	17.7	4.5776
	0.0809	2.1362	-3.3569	7.019
	0.081	8.8501	16.479	8.2397
	0.0811	7.3242	9.7656	10.681
	0.0812	1.5259	8.8501	12.817
	0.0813	8.8501	11.292	7.6294
	0.0814	4.5776	11.597	4.5776
	0.0815	7.9346	8.5449	9.7656
	0.0816	14.038	13.733	7.019
	0.0817	16.785	15.259	3.0518
	0.0818	7.019	5.188	-0.61035
	0.0819	10.681	12.817	6.1035
	0.082	11.292	7.6294	2.7466
	0.0821	2.1362	11.597	4.2725
	0.0822	7.019	14.038	3.6621
	0.0823	3.9673	9.4604	9.4604
	0.0824	17.09	27.771	3.6621
	0.0825	-1.5259	11.902	4.2725
	0.0826	10.681	13.733	4.8828
	0.0827	9.7656	11.902	2.7466
	0.0828	1.5259	8.8501	3.6621
	0.0829	15.869	14.343	5.7983
	0.083	4.5776	12.817	4.5776
	0.0831	5.7983	20.142	5.4932
	0.0832	8.2397	14.954	1.2207
	0.0833	9.4604	12.512	6.4087
	0.0834	5.7983	14.648	5.7983
	0.0835	5.7983	8.5449	-1.2207
	0.0836	-9.7656	12.207	5.4932
	0.0837	1.2207	13.733	1.5259
	0.0838	7.9346	4.5776	-8.2397
	0.0839	2.4414	18.005	5.7983
	0.084	-2.1362	17.395	1.2207
	0.0841	8.2397	13.428	-5.188
	0.0842	4.8828	10.071	4.8828
	0.0843	10.376	17.395	2.4414
	0.0844	5.7983	14.343	7.6294
	0.0845	13.123	11.597	7.9346
	0.0846	-3.0518	13.733	0.30518
	0.0847	0.30518	13.428	-0.61035
	0.0848	1.2207	7.9346	5.7983
	0.0849	11.292	7.6294	-2.1362
	0.085	6.4087	13.733	3.0518
	0.0851	9.7656	8.8501	9.7656
	0.0852	-1.2207	11.292	2.1362
	0.0853	1.5259	11.597	2.1362
	0.0854	4.8828	13.428	3.6621
	0.0855	13.733	17.395	-9.7656
	0.0856	-14.954	11.902	-4.5776
	0.0857	6.1035	7.3242	2.4414
	0.0858	3.3569	20.142	6.4087
	0.0859	1.8311	10.681	-0.61035
	0.086	1.2207	13.123	2.1362
	0.0861	-3.3569	14.343	0
	0.0862	3.9673	12.817	8.2397
	0.0863	0	12.207	0
	0.0864	1.5259	11.292	4.8828
	0.0865	3.9673	10.986	1.8311
	0.0866	5.4932	13.123	1.2207
	0.0867	2.4414	17.7	10.681
	0.0868	1.2207	5.4932	3.0518
	0.0869	3.3569	10.376	5.188
	0.087	0.61035	18.005	7.6294
	0.0871	0.30518	18.921	1.2207
	0.0872	-0.91553	14.954	13.428
	0.0873	1.5259	11.902	6.1035
	0.0874	8.5449	9.7656	1.8311
	0.0875	1.5259	5.7983	1.2207
	0.0876	9.7656	11.902	0.91553
	0.0877	7.6294	8.8501	2.1362
	0.0878	15.259	20.447	2.4414
	0.0879	1.2207	13.123	8.8501
	0.088	5.4932	18.005	3.6621
	0.0881	8.8501	14.648	2.4414
	0.0882	7.9346	10.681	5.4932
	0.0883	10.071	13.428	11.292
	0.0884	3.0518	15.564	3.3569
	0.0885	7.3242	18.921	4.8828
	0.0886	5.7983	7.9346	8.8501
	0.0887	5.4932	13.428	5.7983
	0.0888	10.071	9.7656	7.019
	0.0889	7.3242	10.681	-0.91553
	0.089	1.8311	0.61035	9.4604
	0.0891	3.0518	16.479	8.8501
	0.0892	3.3569	10.071	7.019
	0.0893	7.6294	14.343	2.7466
	0.0894	2.4414	12.817	9.7656
	0.0895	7.6294	11.902	2.7466
	0.0896	6.4087	10.071	5.4932
	0.0897	4.8828	16.174	-0.30518
	0.0898	1.2207	12.207	2.1362
	0.0899	1.5259	15.869	1.5259
	0.09	-4.2725	12.512	7.3242
	0.0901	3.6621	13.123	11.292
	0.0902	8.2397	11.292	3.6621
	0.0903	7.019	20.752	6.4087
	0.0904	10.681	13.428	0.61035
	0.0905	1.5259	9.1553	8.8501
	0.0906	4.5776	7.3242	8.8501
	0.0907	-0.61035	14.954	-0.30518
	0.0908	11.292	15.259	6.4087
	0.0909	0	11.292	-2.1362
	0.091	6.4087	16.174	3.0518
	0.0911	-8.8501	9.1553	6.7139
	0.0912	-1.5259	11.902	3.9673
	0.0913	7.019	28.076	4.5776
	0.0914	2.1362	16.479	6.1035
	0.0915	4.2725	8.2397	1.5259
	0.0916	8.8501	12.512	2.7466
	0.0917	12.207	12.512	-1.2207
	0.0918	3.6621	14.648	4.5776
	0.0919	20.142	9.1553	4.8828
	0.092	7.3242	14.648	2.4414
	0.0921	7.6294	15.564	1.2207
	0.0922	0.30518	11.597	-0.61035
	0.0923	3.0518	12.512	5.7983
	0.0924	3.3569	8.8501	5.188
	0.0925	16.174	15.564	9.1553
	0.0926	8.8501	9.7656	2.4414
	0.0927	7.6294	8.8501	3.0518
	0.0928	5.188	16.785	4.8828
	0.0929	7.019	9.4604	2.1362
	0.093	6.1035	7.6294	10.376
	0.0931	4.8828	14.038	6.7139
	0.0932	13.123	15.564	8.5449
	0.0933	6.7139	13.733	6.4087
	0.0934	7.3242	15.869	0.91553
	0.0935	15.869	13.123	5.188
	0.0936	10.376	18.921	1.8311
	0.0937	10.986	18.921	1.8311
	0.0938	10.376	11.902	-7.6294
	0.0939	19.226	14.648	0.91553
	0.094	6.1035	11.292	10.071
	0.0941	14.648	19.531	2.1362
	0.0942	9.4604	12.817	6.7139
	0.0943	7.3242	10.681	5.188
	0.0944	6.1035	17.7	4.8828
	0.0945	6.1035	9.4604	2.4414
	0.0946	4.5776	14.954	7.3242
	0.0947	13.123	24.414	2.4414
	0.0948	6.7139	7.9346	1.5259
	0.0949	5.4932	10.681	6.1035
	0.095	11.597	4.8828	-3.3569
	0.0951	2.4414	14.648	11.292
	0.0952	12.817	16.174	-1.5259
	0.0953	0	7.019	4.2725
	0.0954	0.61035	10.071	5.4932
	0.0955	10.986	12.512	5.188
	0.0956	18.616	8.8501	1.2207
	0.0957	13.733	14.038	1.8311
	0.0958	13.123	13.123	-1.8311
	0.0959	6.1035	12.817	4.5776
	0.096	13.733	18.616	1.2207
	0.0961	17.7	11.292	7.3242
	0.0962	12.817	9.4604	9.4604
	0.0963	15.564	10.376	0
	0.0964	12.207	8.8501	0
	0.0965	8.8501	19.226	2.7466
	0.0966	8.2397	12.207	6.1035
	0.0967	13.733	13.428	6.1035
	0.0968	3.6621	18.921	0
	0.0969	8.8501	12.512	3.3569
	0.097	5.7983	23.193	5.188
	0.0971	12.512	18.005	-0.30518
	0.0972	9.1553	11.902	2.7466
	0.0973	7.6294	17.395	2.4414
	0.0974	13.428	16.174	2.7466
	0.0975	7.9346	17.09	3.6621
	0.0976	14.954	5.7983	2.7466
	0.0977	19.226	13.428	2.7466
	0.0978	10.376	4.8828	4.8828
	0.0979	11.292	5.7983	4.2725
	0.098	6.1035	11.597	12.512
	0.0981	16.479	16.785	2.7466
	0.0982	14.038	13.733	7.3242
	0.0983	11.597	9.4604	9.4604
	0.0984	6.4087	18.921	3.9673
	0.0985	14.038	14.648	3.9673
	0.0986	12.817	2.1362	3.0518
	0.0987	1.5259	9.4604	2.4414
	0.0988	7.3242	13.428	4.8828
	0.0989	2.1362	18.616	11.292
	0.099	14.954	11.597	3.3569
	0.0991	2.7466	16.785	3.0518
	0.0992	6.7139	17.7	10.681
	0.0993	6.4087	20.142	9.7656
	0.0994	8.8501	15.869	5.188
	0.0995	0.30518	11.902	2.1362
	0.0996	1.5259	11.597	0.30518
	0.0997	10.986	14.343	-3.9673
	0.0998	10.376	16.479	5.188
	0.0999	7.3242	6.4087	5.188
	0.1	13.733	5.4932	3.0518
	0.1001	3.6621	19.531	6.4087
	0.1002	7.9346	13.428	8.2397
	0.1003	4.2725	10.986	3.9673
	0.1004	-2.7466	7.6294	3.6621
	0.1005	10.376	3.9673	-2.4414
	0.1006	2.7466	13.428	9.4604
	0.1007	7.3242	18.616	9.7656
	0.1008	3.0518	12.512	1.8311
	0.1009	5.188	14.038	4.5776
	0.101	-6.4087	11.597	7.019
	0.1011	11.292	13.123	-0.61035
	0.1012	0.91553	14.038	1.5259
	0.1013	-0.91553	9.1553	2.7466
	0.1014	2.7466	18.311	3.0518
	0.1015	4.5776	12.512	3.9673
	0.1016	8.5449	7.9346	7.9346
	0.1017	-1.2207	14.954	11.902
	0.1018	-2.7466	12.817	2.7466
	0.1019	8.8501	5.188	8.8501
	0.102	3.9673	15.259	7.3242
	0.1021	1.2207	7.3242	2.7466
	0.1022	7.019	11.292	-0.91553
	0.1023	3.6621	8.8501	4.8828
	0.1024	-1.5259	9.4604	0.30518
	0.1025	6.1035	22.583	0.61035
	0.1026	2.4414	5.188	0.61035
	0.1027	2.7466	12.817	4.5776
	0.1028	-0.61035	21.973	4.2725
	0.1029	-6.1035	20.142	9.7656
	0.103	0.30518	15.564	6.1035
	0.1031	0.91553	15.259	8.8501
	0.1032	5.4932	10.376	0.91553
	0.1033	5.7983	11.597	-1.5259
	0.1034	5.7983	8.2397	-2.1362
	0.1035	6.1035	12.207	5.4932
	0.1036	12.207	17.7	-1.2207
	0.1037	11.597	10.681	2.1362
	0.1038	8.8501	9.7656	2.4414
	0.1039	8.8501	10.376	4.2725
	0.104	11.292	17.395	2.7466
	0.1041	6.4087	11.292	-1.8311
	0.1042	-4.8828	10.376	-0.91553
	0.1043	11.902	2.1362	12.207
	0.1044	1.8311	17.395	4.8828
	0.1045	8.2397	19.531	1.5259
	0.1046	2.4414	9.7656	5.188
	0.1047	8.8501	7.6294	6.7139
	0.1048	9.4604	14.038	3.9673
	0.1049	5.4932	11.292	2.7466
	0.105	5.7983	13.733	9.7656
	0.1051	0	14.954	4.2725
	0.1052	0.91553	12.817	4.5776
	0.1053	13.733	6.1035	11.292
	0.1054	3.3569	2.4414	7.019
	0.1055	8.2397	4.8828	5.188
	0.1056	9.1553	4.5776	2.4414
	0.1057	4.2725	6.4087	4.5776
	0.1058	6.4087	13.733	9.7656
	0.1059	13.123	20.142	7.3242
	0.106	2.4414	3.0518	-0.61035
	0.1061	9.7656	9.4604	3.0518
	0.1062	-4.8828	18.005	4.8828
	0.1063	10.376	9.1553	3.3569
	0.1064	5.188	18.616	3.3569
	0.1065	3.0518	14.038	4.5776
	0.1066	10.376	12.817	4.5776
	0.1067	8.8501	16.174	-0.61035
	0.1068	-0.61035	11.902	12.512
	0.1069	9.1553	12.817	3.0518
	0.107	7.6294	10.071	4.8828
	0.1071	9.1553	16.174	4.2725
	0.1072	16.479	14.343	5.7983
	0.1073	9.4604	17.395	5.7983
	0.1074	12.817	10.986	7.6294
	0.1075	5.188	3.6621	2.4414
	0.1076	2.7466	14.954	7.3242
	0.1077	7.6294	17.7	-3.0518
	0.1078	3.3569	10.986	5.7983
	0.1079	9.7656	0.91553	8.5449
	0.108	3.3569	12.207	3.6621
	0.1081	2.1362	16.479	8.2397
	0.1082	8.5449	10.071	6.1035
	0.1083	-1.2207	10.986	6.7139
	0.1084	12.817	18.005	0
	0.1085	13.733	18.616	10.681
	0.1086	8.5449	12.817	3.3569
	0.1087	15.564	9.7656	5.4932
	0.1088	-1.5259	13.123	17.7
	0.1089	15.259	13.733	3.0518
	0.109	3.3569	15.869	8.2397
	0.1091	10.986	11.902	2.4414
	0.1092	11.292	17.395	3.3569
	0.1093	7.6294	15.869	5.188
	0.1094	6.7139	5.4932	8.8501
	0.1095	10.681	16.479	5.7983
	0.1096	7.6294	6.7139	6.7139
	0.1097	8.2397	18.005	10.376
	0.1098	11.902	17.09	-0.30518
	0.1099	4.2725	17.09	5.7983
	0.11	3.3569	21.057	12.817
	0.1101	7.019	9.7656	0.61035
	0.1102	0.30518	5.188	8.5449
	0.1103	8.8501	8.2397	5.4932
	0.1104	9.4604	16.785	7.3242
	0.1105	13.733	7.3242	8.2397
	0.1106	16.479	7.3242	6.4087
	0.1107	10.681	15.869	13.733
	0.1108	10.071	18.921	6.7139
	0.1109	13.733	19.226	2.1362
	0.111	3.0518	6.1035	2.1362
	0.1111	-0.61035	19.226	3.3569
	0.1112	5.188	15.869	6.1035
	0.1113	1.8311	10.986	7.3242
	0.1114	7.9346	14.038	4.8828
	0.1115	3.3569	10.071	1.5259
	0.1116	3.0518	7.6294	0.91553
	0.1117	9.1553	13.428	-1.5259
	0.1118	13.428	13.428	11.292
	0.1119	13.123	15.869	1.8311
	0.112	12.817	12.207	3.9673
	0.1121	11.902	10.376	1.5259
	0.1122	8.2397	18.921	2.1362
	0.1123	1.8311	5.4932	8.5449
	0.1124	10.986	15.564	-1.2207
	0.1125	8.5449	11.902	-1.2207
	0.1126	10.376	6.4087	1.8311
	0.1127	15.869	8.2397	4.5776
	0.1128	15.259	12.207	-2.4414
	0.1129	16.479	13.428	0.91553
	0.113	12.512	2.7466	6.1035
	0.1131	11.292	19.226	6.7139
	0.1132	19.836	15.259	3.6621
	0.1133	9.4604	7.6294	3.0518
	0.1134	11.292	16.174	5.4932
	0.1135	-0.61035	8.2397	4.5776
	0.1136	18.921	7.019	4.2725
	0.1137	9.7656	15.259	-2.1362
	0.1138	6.1035	19.226	5.4932
	0.1139	11.597	22.888	1.8311
	0.114	9.1553	11.902	2.4414
	0.1141	9.7656	11.597	1.2207
	0.1142	11.292	10.986	2.1362
	0.1143	13.123	7.9346	3.0518
	0.1144	-0.61035	22.278	1.8311
	0.1145	5.188	15.869	3.9673
	0.1146	6.1035	11.597	7.019
	0.1147	17.395	16.174	3.9673
	0.1148	7.6294	9.4604	3.9673
	0.1149	3.6621	12.512	10.986
	0.115	13.428	13.733	2.7466
	0.1151	8.2397	14.343	4.2725
	0.1152	8.5449	17.7	6.1035
	0.1153	10.681	8.8501	3.3569
	0.1154	7.019	7.019	6.1035
	0.1155	5.7983	10.376	-0.91553
	0.1156	12.512	17.09	-3.9673
	0.1157	4.5776	14.954	2.4414
	0.1158	13.733	17.09	5.4932
	0.1159	12.207	8.8501	5.7983
	0.116	11.292	14.648	4.5776
	0.1161	10.376	16.174	3.0518
	0.1162	-1.5259	20.142	13.428
	0.1163	9.1553	-4.8828	-0.61035
	0.1164	2.4414	14.038	-4.2725
	0.1165	7.3242	11.902	14.343
	0.1166	14.343	10.681	-0.91553
	0.1167	6.4087	10.681	7.019
	0.1168	5.4932	10.376	-3.3569
	0.1169	1.2207	15.259	-0.61035
	0.117	0	4.8828	0.61035
	0.1171	12.512	9.7656	18.311
	0.1172	6.7139	17.09	-3.6621
	0.1173	2.7466	12.817	1.8311
	0.1174	5.4932	8.8501	3.0518
	0.1175	10.681	16.479	3.9673
	0.1176	3.6621	12.512	3.6621
	0.1177	2.4414	7.9346	3.6621
	0.1178	4.2725	14.648	3.3569
	0.1179	-0.30518	10.681	-1.5259
	0.118	-0.61035	7.3242	3.9673
	0.1181	4.8828	21.362	5.7983
	0.1182	8.2397	5.188	1.2207
	0.1183	2.7466	6.4087	5.4932
	0.1184	10.071	11.597	0.91553
	0.1185	10.681	14.343	9.1553
	0.1186	-3.9673	12.207	5.4932
	0.1187	1.2207	14.954	4.2725
	0.1188	12.512	13.123	4.2725
	0.1189	13.123	13.428	8.2397
	0.119	1.8311	7.6294	-0.61035
	0.1191	7.019	7.9346	3.0518
	0.1192	0.91553	13.123	2.4414
	0.1193	-2.1362	10.071	2.7466
	0.1194	1.2207	18.311	4.8828
	0.1195	0.91553	16.174	8.8501
	0.1196	0.61035	16.479	5.4932
	0.1197	4.2725	14.038	1.8311
	0.1198	6.1035	10.681	7.019
	0.1199	-4.8828	9.7656	4.2725
	0.12	0.91553	17.395	10.376
	0.1201	0.91553	20.752	0
	0.1202	-3.3569	8.5449	7.019
	0.1203	6.1035	13.428	-0.30518
	0.1204	1.5259	9.7656	4.8828
	0.1205	1.8311	6.1035	7.9346
	0.1206	1.2207	11.292	3.3569
	0.1207	-0.91553	10.986	13.123
	0.1208	-0.91553	10.681	5.4932
	0.1209	10.071	6.1035	6.7139
	0.121	7.3242	4.2725	14.954
	0.1211	0.91553	7.3242	4.8828
	0.1212	6.7139	12.512	4.5776
	0.1213	2.1362	19.226	2.4414
	0.1214	4.8828	14.038	2.4414
	0.1215	14.954	13.123	6.4087
	0.1216	5.4932	12.512	1.8311
	0.1217	5.4932	7.019	3.3569
	0.1218	11.292	4.5776	5.4932
	0.1219	1.2207	9.7656	0
	0.122	10.986	14.038	7.6294
	0.1221	3.9673	4.8828	0.91553
	0.1222	8.8501	9.7656	3.0518
	0.1223	4.5776	12.817	3.6621
	0.1224	7.3242	7.3242	4.2725
	0.1225	-0.30518	7.6294	3.3569
	0.1226	10.681	17.395	3.6621
	0.1227	5.4932	12.207	0
	0.1228	9.7656	13.428	3.6621
	0.1229	6.4087	10.376	-1.8311
	0.123	6.7139	18.311	0.30518
	0.1231	8.8501	12.207	-0.61035
	0.1232	3.9673	10.376	9.7656
	0.1233	3.6621	15.564	1.8311
	0.1234	3.9673	13.123	4.8828
	0.1235	3.9673	15.869	6.7139
	0.1236	7.6294	12.817	5.188
	0.1237	9.7656	16.174	3.0518
	0.1238	8.5449	18.616	1.2207
	0.1239	8.8501	16.785	10.376
	0.124	13.733	14.954	0
	0.1241	7.9346	10.376	10.986
	0.1242	13.733	12.512	8.2397
	0.1243	0.61035	14.648	6.4087
	0.1244	3.6621	12.512	3.9673
	0.1245	7.6294	10.071	10.071
	0.1246	2.7466	17.395	-1.8311
	0.1247	1.8311	10.681	11.902
	0.1248	6.4087	18.921	1.8311
	0.1249	5.4932	6.4087	2.4414
	0.125	6.7139	10.681	12.817
	0.1251	14.038	7.019	4.5776
	0.1252	7.3242	7.3242	3.3569
	0.1253	6.1035	9.7656	-1.2207
	0.1254	4.5776	7.3242	5.4932
	0.1255	11.597	11.597	17.09
	0.1256	5.4932	22.278	2.7466
	0.1257	6.4087	15.259	4.2725
	0.1258	10.681	3.6621	6.7139
	0.1259	7.6294	12.207	5.7983
	0.126	0.30518	5.4932	-1.2207
	0.1261	8.5449	22.888	3.0518
	0.1262	3.9673	14.343	5.188
	0.1263	12.512	16.479	6.7139
	0.1264	10.986	15.564	4.8828
	0.1265	11.597	10.376	4.8828
	0.1266	10.376	5.188	7.6294
	0.1267	1.5259	10.376	3.3569
	0.1268	12.207	9.7656	13.733
	0.1269	6.7139	21.057	6.7139
	0.127	13.123	18.311	2.7466
	0.1271	2.1362	15.869	11.902
	0.1272	5.7983	15.259	9.7656
	0.1273	15.869	14.038	4.5776
	0.1274	8.5449	17.09	3.6621
	0.1275	3.9673	8.8501	1.2207
	0.1276	10.376	22.888	7.6294
	0.1277	12.207	5.4932	10.071
	0.1278	14.038	10.986	1.8311
	0.1279	19.836	13.428	9.1553
	0.128	14.954	13.733	4.8828
	0.1281	13.428	14.038	-1.8311
	0.1282	3.6621	11.292	4.5776
	0.1283	10.681	20.447	3.0518
	0.1284	9.1553	11.597	2.1362
	0.1285	10.376	15.869	7.9346
	0.1286	12.817	13.428	5.4932
	0.1287	9.1553	13.428	1.2207
	0.1288	7.6294	11.597	0.30518
	0.1289	7.019	13.733	4.2725
	0.129	4.2725	9.7656	4.5776
	0.1291	10.376	11.292	10.071
	0.1292	13.733	9.4604	8.5449
	0.1293	14.954	9.7656	10.681
	0.1294	9.4604	13.123	9.7656
	0.1295	9.4604	13.123	15.564
	0.1296	6.4087	13.123	5.7983
	0.1297	14.954	12.207	9.7656
	0.1298	14.648	12.817	-3.0518
	0.1299	11.292	10.986	8.8501
	0.13	6.1035	12.512	12.512
	0.1301	14.954	15.259	-0.61035
	0.1302	10.986	0.61035	6.7139
	0.1303	15.869	11.292	5.7983
	0.1304	14.038	18.311	3.3569
	0.1305	7.019	12.512	8.8501
	0.1306	0.61035	10.071	0
	0.1307	4.8828	12.817	4.8828
	0.1308	5.7983	10.071	3.6621
	0.1309	10.681	6.4087	5.7983
	0.131	10.376	11.597	8.2397
	0.1311	13.428	8.8501	12.207
	0.1312	8.8501	7.019	3.0518
	0.1313	7.019	13.428	7.3242
	0.1314	8.5449	12.817	-0.30518
	0.1315	13.123	14.343	12.207
	0.1316	9.1553	11.597	3.9673
	0.1317	3.9673	13.428	4.5776
	0.1318	4.2725	9.1553	-10.071
	0.1319	5.4932	18.311	3.6621
	0.132	9.7656	12.512	3.0518
	0.1321	10.681	15.869	3.6621
	0.1322	0.30518	11.902	4.2725
	0.1323	4.2725	13.733	0
	0.1324	5.7983	10.681	7.019
	0.1325	3.0518	9.7656	-7.3242
	0.1326	11.902	17.09	8.2397
	0.1327	0	12.512	3.9673
	0.1328	10.681	15.564	10.071
	0.1329	10.986	20.752	7.019
	0.133	11.597	15.259	-0.61035
	0.1331	3.0518	11.902	7.9346
	0.1332	9.7656	16.174	8.2397
	0.1333	13.733	16.174	4.2725
	0.1334	5.7983	8.5449	2.1362
	0.1335	13.428	1.8311	6.4087
	0.1336	-1.2207	13.428	2.4414
	0.1337	-0.30518	9.1553	7.6294
	0.1338	1.8311	15.259	9.4604
	0.1339	8.8501	12.512	12.817
	0.134	9.4604	7.019	5.4932
	0.1341	2.7466	7.3242	6.1035
	0.1342	7.019	17.09	-3.0518
	0.1343	3.9673	5.188	1.8311
	0.1344	0.91553	16.785	7.6294
	0.1345	7.9346	8.2397	-3.3569
	0.1346	1.5259	16.785	3.3569
	0.1347	6.4087	18.005	-1.5259
	0.1348	3.9673	18.311	5.4932
	0.1349	8.8501	7.3242	3.0518
	0.135	4.5776	7.3242	9.4604
	0.1351	0.61035	6.7139	-3.0518
	0.1352	4.8828	9.4604	5.7983
	0.1353	9.1553	18.005	9.1553
	0.1354	6.7139	15.259	11.902
	0.1355	6.7139	16.785	7.6294
	0.1356	-5.188	18.005	7.9346
	0.1357	10.986	10.071	3.3569
	0.1358	0.91553	9.4604	-0.61035
	0.1359	7.3242	9.4604	6.4087
	0.136	4.5776	18.921	6.7139
	0.1361	7.6294	7.3242	2.4414
	0.1362	2.1362	13.428	3.9673
	0.1363	8.2397	16.479	5.4932
	0.1364	7.3242	12.817	5.7983
	0.1365	3.6621	18.921	7.9346
	0.1366	1.5259	14.648	7.019
	0.1367	-1.8311	18.311	11.902
	0.1368	1.2207	17.09	-2.1362
	0.1369	0	11.292	2.4414
	0.137	8.5449	11.597	5.4932
	0.1371	11.902	10.376	4.2725
	0.1372	5.7983	9.1553	9.4604
	0.1373	-3.0518	18.311	4.8828
	0.1374	0	12.512	6.4087
	0.1375	-9.4604	12.817	8.5449
	0.1376	11.902	9.7656	8.5449
	0.1377	3.0518	10.986	4.8828
	0.1378	-4.2725	13.733	5.188
	0.1379	5.7983	23.499	5.188
	0.138	4.5776	8.8501	4.2725
	0.1381	7.9346	24.109	1.8311
	0.1382	2.1362	17.7	1.5259
	0.1383	9.1553	10.681	7.3242
	0.1384	9.4604	20.447	2.1362
	0.1385	7.3242	13.123	3.9673
	0.1386	7.019	5.4932	-0.91553
	0.1387	16.174	9.1553	5.7983
	0.1388	1.5259	10.376	7.019
	0.1389	3.9673	10.376	6.7139
	0.139	11.597	6.7139	7.9346
	0.1391	12.207	17.395	8.5449
	0.1392	0.91553	17.7	4.2725
	0.1393	4.5776	14.648	-0.91553
	0.1394	5.7983	15.259	6.4087
	0.1395	6.7139	9.4604	1.2207
	0.1396	6.4087	19.836	5.188
	0.1397	14.954	14.954	3.6621
	0.1398	6.1035	17.09	0.61035
	0.1399	8.5449	14.954	-3.6621
	0.14	5.7983	7.6294	5.188
	0.1401	5.4932	15.259	9.7656
	0.1402	5.7983	15.564	9.1553
	0.1403	7.019	20.142	7.019
	0.1404	11.597	5.7983	4.2725
	0.1405	11.597	10.376	10.071
	0.1406	4.2725	16.174	8.2397
	0.1407	8.5449	16.479	6.1035
	0.1408	2.1362	11.597	12.512
	0.1409	12.207	11.597	-2.1362
	0.141	-3.6621	16.174	1.5259
	0.1411	2.1362	13.123	3.6621
	0.1412	9.4604	8.2397	7.6294
	0.1413	-0.30518	22.583	5.7983
	0.1414	5.188	13.123	7.019
	0.1415	-0.61035	14.648	2.7466
	0.1416	1.2207	12.512	11.292
	0.1417	13.733	8.8501	12.512
	0.1418	10.071	14.648	7.019
	0.1419	18.005	13.123	6.7139
	0.142	3.6621	15.869	7.6294
	0.1421	6.4087	6.4087	3.3569
	0.1422	15.564	7.9346	0.91553
	0.1423	4.8828	7.3242	7.3242
	0.1424	11.597	16.479	3.9673
	0.1425	1.2207	8.2397	8.8501
	0.1426	14.343	11.292	5.188
	0.1427	1.8311	4.5776	1.8311
	0.1428	5.4932	19.226	3.6621
	0.1429	5.7983	13.428	1.8311
	0.143	10.376	14.648	-4.5776
	0.1431	6.7139	11.597	1.8311
	0.1432	11.292	10.376	9.7656
	0.1433	7.6294	10.376	2.4414
	0.1434	7.3242	11.292	5.188
	0.1435	6.7139	12.207	-2.4414
	0.1436	7.6294	18.311	4.5776
	0.1437	11.597	12.817	6.4087
	0.1438	5.7983	7.3242	4.2725
	0.1439	-4.2725	7.6294	0
	0.144	11.597	15.564	11.292
	0.1441	11.292	10.681	12.512
	0.1442	9.1553	11.292	-0.30518
	0.1443	10.376	21.973	6.1035
	0.1444	14.038	14.954	0
	0.1445	11.597	6.1035	1.8311
	0.1446	14.954	16.174	7.9346
	0.1447	10.681	9.1553	6.4087
	0.1448	9.1553	10.986	3.6621
	0.1449	8.2397	14.954	7.3242
	0.145	13.428	16.479	-2.1362
	0.1451	10.681	14.954	0
	0.1452	10.376	11.902	-0.91553
	0.1453	11.902	7.9346	3.3569
	0.1454	7.6294	13.733	0
	0.1455	11.597	10.071	8.2397
	0.1456	1.2207	9.4604	4.5776
	0.1457	10.986	15.564	4.8828
	0.1458	12.207	9.1553	9.4604
	0.1459	16.785	14.954	6.4087
	0.146	17.09	12.512	5.188
	0.1461	12.817	14.954	4.5776
	0.1462	12.207	12.512	8.2397
	0.1463	9.4604	15.259	1.2207
	0.1464	14.038	11.902	6.1035
	0.1465	14.038	9.7656	2.7466
	0.1466	13.428	11.902	0.30518
	0.1467	13.428	11.292	3.3569
	0.1468	13.733	20.142	1.8311
	0.1469	17.7	18.005	9.7656
	0.147	8.5449	12.512	-6.1035
	0.1471	10.986	11.902	6.1035
	0.1472	10.071	19.226	2.7466
	0.1473	5.188	21.667	4.5776
	0.1474	7.3242	21.057	-1.8311
	0.1475	6.1035	5.4932	7.3242
	0.1476	11.902	0.91553	3.0518
	0.1477	3.3569	19.531	7.6294
	0.1478	6.7139	20.752	5.7983
	0.1479	7.9346	17.09	8.5449
	0.148	10.376	8.2397	3.9673
	0.1481	18.921	15.564	1.2207
	0.1482	6.1035	11.292	7.6294
	0.1483	15.564	13.428	0.61035
	0.1484	9.4604	5.7983	3.9673
	0.1485	0.61035	11.292	0
	0.1486	0.91553	14.038	-1.5259
	0.1487	7.019	14.038	11.292
	0.1488	5.7983	6.7139	7.3242
	0.1489	4.5776	15.259	2.4414
	0.149	2.1362	10.376	-0.30518
	0.1491	6.4087	18.616	3.9673
	0.1492	14.343	16.479	7.3242
	0.1493	7.9346	12.512	7.3242
	0.1494	5.7983	15.259	3.0518
	0.1495	3.9673	20.142	10.681
	0.1496	12.512	3.6621	1.8311
	0.1497	0.30518	17.7	9.7656
	0.1498	7.9346	16.174	12.207
	0.1499	6.7139	17.09	-2.1362
	0.15	3.0518	15.259	6.7139
	0.1501	4.5776	11.902	7.3242
	0.1502	11.597	16.174	7.6294
	0.1503	-1.8311	12.207	8.5449
	0.1504	7.9346	5.7983	6.1035
	0.1505	5.188	5.4932	-2.4414
	0.1506	0.91553	13.123	7.3242
	0.1507	9.7656	9.4604	5.188
	0.1508	7.6294	13.733	5.7983
	0.1509	4.2725	18.311	14.954
	0.151	3.0518	10.986	1.8311
	0.1511	0	10.986	6.4087
	0.1512	5.188	11.902	4.5776
	0.1513	-1.5259	11.902	9.4604
	0.1514	7.9346	3.0518	3.9673
	0.1515	-3.9673	14.648	1.2207
	0.1516	10.986	2.4414	1.8311
	0.1517	9.7656	11.597	1.5259
	0.1518	5.4932	5.188	4.5776
	0.1519	2.1362	15.869	-0.30518
	0.152	6.1035	13.733	10.071
	0.1521	2.4414	11.292	6.7139
	0.1522	0.91553	7.019	4.5776
	0.1523	-9.4604	15.869	4.5776
	0.1524	7.9346	9.7656	7.019
	0.1525	5.7983	18.616	1.8311
	0.1526	2.4414	2.4414	4.5776
	0.1527	-0.30518	14.038	6.1035
	0.1528	-2.1362	15.564	2.1362
	0.1529	4.8828	7.6294	8.5449
	0.153	2.7466	11.902	5.188
	0.1531	3.0518	7.6294	-7.3242
	0.1532	2.4414	6.7139	11.597
	0.1533	6.1035	7.019	-0.30518
	0.1534	0.91553	12.512	14.038
	0.1535	0.61035	13.123	6.4087
	0.1536	8.2397	17.395	6.4087
	0.1537	11.292	16.479	-1.5259
	0.1538	4.2725	13.428	3.3569
	0.1539	7.9346	10.681	7.019
	0.154	-1.5259	16.479	3.3569
	0.1541	9.1553	14.648	4.2725
	0.1542	6.1035	8.5449	6.4087
	0.1543	10.376	11.292	0
	0.1544	1.8311	14.648	4.5776
	0.1545	7.019	8.5449	2.1362
	0.1546	4.5776	16.785	10.681
	0.1547	3.0518	14.343	1.5259
	0.1548	9.1553	14.954	4.5776
	0.1549	6.7139	10.376	6.4087
	0.155	6.7139	10.376	1.5259
	0.1551	9.4604	16.479	0.30518
	0.1552	16.479	21.362	2.7466
	0.1553	7.6294	7.3242	3.3569
	0.1554	3.3569	10.071	11.597
	0.1555	7.019	-0.30518	12.512
	0.1556	11.597	5.7983	3.0518
	0.1557	0	14.038	0
	0.1558	1.5259	17.09	4.5776
	0.1559	6.1035	14.648	7.3242
	0.156	3.9673	14.648	-0.61035
	0.1561	6.4087	17.7	4.2725
	0.1562	7.019	9.7656	2.4414
	0.1563	2.4414	13.428	0.30518
	0.1564	3.9673	16.479	6.1035
	0.1565	7.3242	7.9346	2.4414
	0.1566	8.5449	7.019	-1.2207
	0.1567	6.4087	19.226	2.7466
	0.1568	1.8311	6.7139	8.2397
	0.1569	2.7466	20.752	2.7466
	0.157	3.3569	21.362	0
	0.1571	13.733	9.1553	8.5449
	0.1572	7.019	13.733	7.9346
	0.1573	2.1362	14.343	1.5259
	0.1574	9.1553	12.817	7.3242
	0.1575	0.91553	10.986	3.3569
	0.1576	6.4087	13.428	7.019
	0.1577	0.30518	11.292	3.3569
	0.1578	3.3569	10.681	8.5449
	0.1579	7.9346	8.5449	1.8311
	0.158	6.7139	13.733	3.6621
	0.1581	15.259	13.733	10.376
	0.1582	10.986	17.7	10.376
	0.1583	-3.0518	10.681	-0.30518
	0.1584	18.311	16.479	1.8311
	0.1585	9.1553	15.869	5.4932
	0.1586	22.278	14.038	7.019
	0.1587	9.1553	20.447	6.4087
	0.1588	11.597	20.752	-8.2397
	0.1589	10.071	14.038	-3.0518
	0.159	7.9346	14.038	7.019
	0.1591	14.038	5.188	3.0518
	0.1592	8.5449	21.667	9.1553
	0.1593	5.188	11.902	10.681
	0.1594	6.4087	16.174	-0.61035
	0.1595	8.2397	14.343	-0.30518
	0.1596	4.5776	10.071	3.3569
	0.1597	7.019	9.1553	7.6294
	0.1598	10.376	13.733	4.5776
	0.1599	5.188	10.376	9.1553
	0.16	14.343	12.817	4.8828
	0.1601	9.1553	9.4604	10.071
	0.1602	11.902	15.564	13.123
	0.1603	16.479	14.648	1.8311
	0.1604	10.376	16.479	1.2207
	0.1605	8.5449	14.343	3.6621
	0.1606	6.7139	8.5449	3.9673
	0.1607	4.8828	4.5776	3.3569
	0.1608	7.9346	16.174	12.207
	0.1609	9.7656	17.7	8.5449
	0.161	4.5776	10.681	10.986
	0.1611	5.188	12.817	2.7466
	0.1612	14.648	11.597	8.8501
	0.1613	13.733	16.174	10.681
	0.1614	7.9346	9.7656	3.0518
	0.1615	13.428	7.9346	7.3242
	0.1616	14.343	15.564	3.9673
	0.1617	9.4604	14.343	5.4932
	0.1618	4.8828	19.226	5.4932
	0.1619	15.869	13.428	-3.6621
	0.162	10.681	8.8501	7.3242
	0.1621	6.4087	7.9346	3.0518
	0.1622	7.3242	17.09	2.1362
	0.1623	19.226	10.681	4.2725
	0.1624	13.123	12.207	8.2397
	0.1625	13.733	7.3242	10.071
	0.1626	16.479	17.09	4.2725
	0.1627	5.7983	6.1035	3.3569
	0.1628	3.6621	5.188	3.3569
	0.1629	13.428	3.9673	4.8828
	0.163	10.986	8.2397	1.2207
	0.1631	14.343	14.648	0.91553
	0.1632	11.597	8.5449	8.5449
	0.1633	5.188	10.071	0.61035
	0.1634	10.986	18.311	7.9346
	0.1635	4.8828	4.5776	7.3242
	0.1636	21.362	9.1553	0.91553
	0.1637	8.5449	13.428	2.4414
	0.1638	19.226	9.7656	1.2207
	0.1639	8.5449	15.564	4.5776
	0.164	12.512	23.499	7.3242
	0.1641	6.1035	14.954	3.6621
	0.1642	12.817	20.752	2.1362
	0.1643	1.2207	6.1035	6.4087
	0.1644	6.7139	11.292	-0.61035
	0.1645	17.7	18.311	7.3242
	0.1646	9.7656	7.3242	4.8828
	0.1647	7.6294	13.733	2.7466
	0.1648	13.123	10.986	8.8501
	0.1649	15.869	15.869	8.5449
	0.165	12.207	10.681	1.2207
	0.1651	6.4087	10.071	2.7466
	0.1652	5.7983	1.8311	7.6294
	0.1653	3.0518	11.597	1.5259
	0.1654	8.5449	15.259	5.188
	0.1655	2.4414	10.071	6.1035
	0.1656	4.2725	14.343	0
	0.1657	12.512	10.376	10.681
	0.1658	14.038	7.3242	8.2397
	0.1659	3.9673	12.207	-5.188
	0.166	8.5449	15.259	-2.1362
	0.1661	11.902	10.376	10.376
	0.1662	8.5449	15.564	4.2725
	0.1663	0.30518	4.2725	2.1362
	0.1664	14.954	12.207	0.61035
	0.1665	8.8501	12.512	3.3569
	0.1666	1.8311	10.071	8.2397
	0.1667	14.954	4.5776	7.9346
	0.1668	0	12.817	6.4087
	0.1669	8.8501	20.447	5.4932
	0.167	11.597	12.512	5.188
	0.1671	9.1553	16.785	5.7983
	0.1672	9.1553	15.564	-1.8311
	0.1673	4.5776	8.5449	6.4087
	0.1674	7.3242	10.376	3.0518
	0.1675	2.7466	12.817	7.6294
	0.1676	14.648	13.733	6.4087
	0.1677	-0.61035	8.8501	5.4932
	0.1678	7.019	14.038	3.6621
	0.1679	4.8828	13.123	9.7656
	0.168	0.30518	-3.3569	1.8311
	0.1681	5.188	10.376	8.2397
	0.1682	3.6621	15.564	6.7139
	0.1683	9.1553	7.9346	4.5776
	0.1684	8.8501	21.057	-1.2207
	0.1685	7.3242	11.292	3.6621
	0.1686	-0.61035	10.071	-1.2207
	0.1687	7.9346	9.4604	1.5259
	0.1688	3.3569	6.4087	4.8828
	0.1689	0.30518	13.123	-1.2207
	0.169	-10.071	16.479	4.8828
	0.1691	7.3242	9.1553	-0.61035
	0.1692	0.61035	17.09	7.6294
	0.1693	-1.2207	6.1035	5.188
	0.1694	-6.1035	7.9346	0
	0.1695	0	12.817	1.5259
	0.1696	6.1035	9.4604	7.019
	0.1697	1.2207	9.4604	-1.8311
	0.1698	4.5776	11.292	6.1035
	0.1699	10.986	11.292	8.5449
	0.17	7.6294	10.376	3.0518
	0.1701	1.5259	19.531	7.9346
	0.1702	0.30518	7.9346	4.2725
	0.1703	6.1035	12.512	8.2397
	0.1704	-0.30518	15.564	1.8311
	0.1705	6.1035	14.343	0.91553
	0.1706	4.5776	3.0518	5.4932
	0.1707	12.512	13.123	10.376
	0.1708	2.7466	9.7656	4.2725
	0.1709	6.1035	14.648	4.8828
	0.171	2.7466	14.648	5.188
	0.1711	-1.8311	8.8501	-3.6621
	0.1712	4.8828	11.292	7.019
	0.1713	2.4414	15.869	2.1362
	0.1714	1.5259	12.817	0
	0.1715	4.2725	18.005	1.8311
	0.1716	-1.5259	13.733	1.2207
	0.1717	8.8501	8.5449	7.019
	0.1718	7.3242	5.4932	3.3569
	0.1719	2.1362	5.4932	4.2725
	0.172	9.7656	18.005	4.5776
	0.1721	8.2397	14.343	5.4932
	0.1722	15.564	-0.61035	5.188
	0.1723	1.2207	4.5776	8.5449
	0.1724	2.1362	15.564	7.019
	0.1725	3.3569	13.123	4.2725
	0.1726	7.9346	24.109	1.2207
	0.1727	3.3569	7.9346	-6.4087
	0.1728	1.5259	10.986	3.0518
	0.1729	1.8311	5.4932	0
	0.173	0.91553	14.343	-4.5776
	0.1731	5.7983	10.376	1.5259
	0.1732	3.0518	15.259	-5.7983
	0.1733	11.597	12.207	5.4932
	0.1734	6.4087	14.954	7.6294
	0.1735	6.7139	17.7	15.259
	0.1736	1.8311	16.174	4.8828
	0.1737	5.188	12.817	3.3569
	0.1738	-1.5259	12.512	14.343
	0.1739	8.8501	6.7139	2.1362
	0.174	7.3242	16.479	10.071
	0.1741	6.7139	10.986	4.5776
	0.1742	-2.7466	14.648	2.7466
	0.1743	14.038	12.512	6.1035
	0.1744	7.3242	9.7656	1.8311
	0.1745	5.188	19.226	-3.6621
	0.1746	10.681	20.752	2.4414
	0.1747	4.2725	0.61035	7.019
	0.1748	10.376	11.597	2.4414
	0.1749	8.8501	14.038	0.61035
	0.175	-0.91553	12.207	10.681
	0.1751	15.259	18.616	4.2725
	0.1752	3.9673	9.7656	3.9673
	0.1753	7.6294	5.188	8.5449
	0.1754	9.1553	15.259	8.2397
	0.1755	8.5449	15.259	9.7656
	0.1756	9.7656	14.038	1.2207
	0.1757	7.9346	13.428	6.1035
	0.1758	18.311	13.733	2.1362
	0.1759	5.188	5.188	7.3242
	0.176	8.8501	7.6294	10.681
	0.1761	5.188	11.597	6.7139
	0.1762	8.2397	13.123	7.9346
	0.1763	8.8501	12.512	1.8311
	0.1764	11.292	17.09	7.3242
	0.1765	10.681	16.479	1.8311
	0.1766	7.3242	7.9346	5.188
	0.1767	22.888	11.902	4.8828
	0.1768	18.616	14.648	2.4414
	0.1769	5.4932	18.616	8.2397
	0.177	10.071	8.5449	3.3569
	0.1771	15.564	18.311	6.7139
	0.1772	13.733	4.5776	9.7656
	0.1773	20.447	12.512	7.019
	0.1774	5.7983	14.954	3.9673
	0.1775	14.038	18.005	5.188
	0.1776	18.921	14.038	5.7983
	0.1777	3.9673	5.7983	11.597
	0.1778	10.071	14.343	7.019
	0.1779	1.2207	14.038	1.8311
	0.178	6.7139	17.7	0
	0.1781	7.9346	12.512	4.2725
	0.1782	13.123	9.4604	6.4087
	0.1783	12.207	14.038	5.4932
	0.1784	7.019	18.616	-3.0518
	0.1785	14.648	16.785	11.292
	0.1786	13.733	18.921	-0.91553
	0.1787	14.648	15.564	7.019
	0.1788	16.479	16.174	9.1553
	0.1789	9.1553	8.8501	1.2207
	0.179	11.902	16.785	7.3242
	0.1791	4.8828	15.259	-1.2207
	0.1792	10.376	24.109	7.6294
	0.1793	-0.30518	9.1553	9.4604
	0.1794	2.7466	4.8828	10.986
	0.1795	16.785	2.4414	9.7656
	0.1796	19.226	7.6294	6.7139
	0.1797	16.479	16.174	2.4414
	0.1798	9.1553	13.733	5.188
	0.1799	8.2397	11.597	9.7656
	0.18	6.4087	10.071	6.4087
	0.1801	7.9346	19.836	12.207
	0.1802	-1.2207	7.3242	7.3242
	0.1803	13.428	14.343	4.2725
	0.1804	18.311	4.8828	-1.8311
	0.1805	8.2397	9.4604	-3.6621
	0.1806	9.1553	15.259	5.4932
	0.1807	7.6294	19.226	2.4414
	0.1808	8.8501	5.4932	8.5449
	0.1809	8.2397	4.2725	10.376
	0.181	6.1035	15.259	1.8311
	0.1811	7.6294	0.30518	-1.8311
	0.1812	9.7656	12.817	9.4604
	0.1813	0.30518	13.733	6.4087
	0.1814	3.0518	11.902	0.30518
	0.1815	12.207	12.512	5.4932
	0.1816	7.6294	17.395	8.2397
	0.1817	9.1553	7.3242	5.4932
	0.1818	9.4604	11.902	2.1362
	0.1819	0	8.5449	0.91553
	0.182	12.817	11.292	3.0518
	0.1821	3.3569	14.038	1.8311
	0.1822	2.1362	11.902	7.019
	0.1823	5.4932	8.8501	7.9346
	0.1824	10.071	13.123	5.188
	0.1825	7.3242	11.292	-3.3569
	0.1826	9.7656	11.902	4.2725
	0.1827	9.1553	9.4604	5.4932
	0.1828	10.376	10.376	-0.91553
	0.1829	1.5259	23.499	4.5776
	0.183	3.6621	7.6294	4.8828
	0.1831	17.7	9.7656	6.7139
	0.1832	10.376	11.902	1.2207
	0.1833	11.597	5.4932	-0.61035
	0.1834	9.4604	14.038	0
	0.1835	0.91553	10.986	8.5449
	0.1836	-5.7983	13.123	3.3569
	0.1837	3.0518	6.7139	7.3242
	0.1838	3.6621	3.9673	5.188
	0.1839	0.91553	15.564	7.9346
	0.184	4.8828	5.188	4.5776
	0.1841	5.188	18.311	3.0518
	0.1842	2.7466	21.973	1.8311
	0.1843	14.343	12.817	-0.91553
	0.1844	-2.1362	7.9346	-1.2207
	0.1845	5.7983	12.817	1.8311
	0.1846	3.0518	15.564	4.2725
	0.1847	-1.5259	21.973	1.8311
	0.1848	10.376	4.5776	6.1035
	0.1849	4.2725	10.376	2.1362
	0.185	7.6294	11.597	0
	0.1851	9.7656	17.09	3.9673
	0.1852	5.188	10.681	3.9673
	0.1853	2.1362	9.7656	4.2725
	0.1854	3.0518	8.5449	2.7466
	0.1855	3.9673	9.7656	7.3242
	0.1856	12.207	13.733	8.5449
	0.1857	-0.91553	18.005	-12.207
	0.1858	5.4932	2.4414	1.8311
	0.1859	6.4087	14.343	12.207
	0.186	3.3569	23.193	2.7466
	0.1861	-5.7983	13.428	6.7139
	0.1862	1.8311	18.311	5.188
	0.1863	-0.61035	10.681	7.6294
	0.1864	1.2207	9.4604	1.5259
	0.1865	6.1035	13.428	5.188
	0.1866	5.7983	14.343	10.376
	0.1867	-0.61035	6.1035	3.6621
	0.1868	7.6294	3.9673	-0.30518
	0.1869	12.817	8.5449	4.2725
	0.187	8.2397	10.071	-0.30518
	0.1871	10.071	15.259	3.6621
	0.1872	3.3569	3.3569	9.1553
	0.1873	11.597	10.071	9.7656
	0.1874	10.376	12.817	5.7983
	0.1875	12.512	7.3242	1.2207
	0.1876	1.8311	18.311	-2.7466
	0.1877	0.30518	15.564	-3.0518
	0.1878	6.1035	15.564	9.4604
	0.1879	3.6621	23.193	8.5449
	0.188	2.1362	13.428	0.61035
	0.1881	1.5259	8.2397	8.2397
	0.1882	6.4087	14.648	7.9346
	0.1883	4.2725	13.428	3.0518
	0.1884	5.7983	4.5776	5.4932
	0.1885	4.2725	2.4414	7.9346
	0.1886	6.7139	12.207	2.4414
	0.1887	8.2397	16.785	2.7466
	0.1888	7.6294	15.564	2.1362
	0.1889	8.2397	10.376	0
	0.189	11.902	13.428	6.7139
	0.1891	5.7983	12.207	8.5449
	0.1892	5.7983	1.2207	7.3242
	0.1893	8.5449	20.142	8.2397
	0.1894	5.4932	17.09	6.4087
	0.1895	3.9673	17.7	0.30518
	0.1896	0.61035	20.752	3.3569
	0.1897	1.8311	15.259	5.188
	0.1898	6.1035	7.6294	-2.4414
	0.1899	3.9673	6.1035	5.7983
	0.19	7.6294	10.376	2.1362
	0.1901	9.7656	11.597	3.9673
	0.1902	8.2397	11.292	3.0518
	0.1903	12.817	6.7139	7.3242
	0.1904	13.428	16.785	8.8501
	0.1905	4.2725	11.597	6.4087
	0.1906	8.2397	14.954	0.61035
	0.1907	7.019	15.259	11.902
	0.1908	8.8501	14.954	3.0518
	0.1909	0	9.4604	7.6294
	0.191	6.4087	8.2397	7.019
	0.1911	10.681	12.817	6.7139
	0.1912	-4.8828	6.1035	-1.5259
	0.1913	9.1553	29.602	12.512
	0.1914	7.019	18.005	4.2725
	0.1915	0.30518	7.6294	2.7466
	0.1916	9.4604	12.512	0
	0.1917	4.8828	15.259	0
	0.1918	9.7656	15.869	10.376
	0.1919	9.1553	11.597	9.4604
	0.192	8.5449	13.733	8.5449
	0.1921	13.428	13.428	2.1362
	0.1922	5.7983	12.207	10.071
	0.1923	10.071	14.343	0
	0.1924	12.512	15.564	-2.1362
	0.1925	6.1035	9.1553	5.188
	0.1926	7.6294	11.292	8.5449
	0.1927	10.681	10.986	-0.61035
	0.1928	9.4604	14.954	7.9346
	0.1929	12.207	10.071	1.5259
	0.193	8.2397	20.447	8.2397
	0.1931	6.4087	13.123	0.91553
	0.1932	6.1035	17.09	2.4414
	0.1933	5.4932	6.7139	3.9673
	0.1934	10.986	11.902	2.4414
	0.1935	12.512	15.564	3.6621
	0.1936	8.5449	11.292	6.1035
	0.1937	11.902	17.7	-3.6621
	0.1938	11.597	14.343	3.0518
	0.1939	5.188	9.4604	17.09
	0.194	21.973	16.479	3.9673
	0.1941	7.9346	11.597	12.512
	0.1942	4.8828	10.986	9.7656
	0.1943	3.9673	25.33	3.0518
	0.1944	5.4932	11.597	7.3242
	0.1945	5.188	11.902	7.019
	0.1946	1.5259	8.5449	5.4932
	0.1947	8.8501	2.1362	7.6294
	0.1948	10.071	18.311	7.019
	0.1949	10.986	14.648	3.6621
	0.195	16.785	19.226	0
	0.1951	12.512	12.512	-1.2207
	0.1952	10.986	15.869	6.1035
	0.1953	6.4087	15.259	3.3569
	0.1954	5.4932	11.292	12.817
	0.1955	16.479	17.09	1.8311
	0.1956	14.038	17.395	-0.30518
	0.1957	1.5259	13.428	7.3242
	0.1958	10.376	6.4087	7.3242
	0.1959	11.292	5.7983	0
	0.196	10.071	14.648	6.7139
	0.1961	20.752	10.376	0
	0.1962	17.09	10.986	4.2725
	0.1963	12.207	7.6294	0.91553
	0.1964	14.343	7.9346	8.5449
	0.1965	13.733	14.954	7.019
	0.1966	10.681	10.681	5.4932
	0.1967	12.207	7.6294	8.2397
	0.1968	15.869	12.817	8.8501
	0.1969	1.5259	17.09	0.91553
	0.197	15.259	13.733	0
	0.1971	20.752	21.362	5.188
	0.1972	5.188	16.785	-0.61035
	0.1973	9.7656	18.005	1.5259
	0.1974	17.395	14.954	5.4932
	0.1975	6.7139	11.597	3.9673
	0.1976	8.8501	7.9346	3.9673
	0.1977	11.902	14.648	14.038
	0.1978	12.207	15.259	7.9346
	0.1979	7.3242	15.259	12.512
	0.198	9.7656	15.259	4.8828
	0.1981	8.8501	7.9346	8.2397
	0.1982	6.1035	11.902	4.2725
	0.1983	8.8501	18.311	4.8828
	0.1984	14.038	17.09	2.7466
	0.1985	3.6621	21.362	-3.3569
	0.1986	3.3569	12.512	2.7466
	0.1987	9.1553	11.292	3.6621
	0.1988	4.2725	15.259	5.188
	0.1989	6.7139	12.512	0.91553
	0.199	0.30518	16.785	3.9673
	0.1991	12.817	12.207	10.986
	0.1992	1.5259	12.207	3.0518
	0.1993	6.1035	10.986	6.1035
	0.1994	10.376	14.954	11.292
	0.1995	5.7983	14.343	3.3569
	0.1996	11.902	7.6294	18.921
	0.1997	7.3242	13.733	2.1362
[truncated: 25,002 more rows]

## Sheet: Fig3B,C,D
	Fig 3B				Fig 3C			Fig 3D
	Direction	PR mediated (Hz)	ChR2 mediated (Hz)		PR - direction (degrees)	ChR2 - direction (degrees)		PR - DSI	ChR2 - DSI
	0	308.558	291.696		276.525	288.029		0.475657	0.0565442
	45	153.227	116.969		347.949	341.669		0.367431	0.595485
	90	104.348	41.9047		233.319	246.702		0.30682	0.707797
	135	127.551	31.9653		243.118	246.795		0.347659	0.379084
	180	111.713	31.9653		331.433	328.534		0.741051	0.665398
	225	78.0543	58.0786		9.93662	16.7738		0.296574	0.31028
	270	96.7629	134.422		331.94	345.474		0.264593	0.182118
	315	257.049	234.285		366.751	351.397		0.439452	0.482176
	vector sum - angle	355	336
	vector sum - DSI	0.28	0.52
