# Supplementary material for: Retinal direction selectivity in the absence of asymmetric starburst amacrine cell responses
Source: eLife journal article supplement (doi:10.7554/elife.42392), 2019-02-04
Supplement: supp [file elife-42392-supp-v1.zip › elife_poa_e42392_Figure_4_source_data_1.xlsx]

## Sheet: Fig 4A
Fig 4A (left)					Fig 4A (right)
time	EPSC	IPSC	Spiking		time	EPSC	IPSC	Spiking
0	-4.24161	22.0883	-2.58149		0	-2.71661	-4.76668	-1.05559
0.0001	-0.274615	23.9183	-4.10739		0.0001	-5.15761	-0.491683	5.65821
0.0002	-5.76761	9.87832	0.77541		0.0002	-3.32661	-2.01968	-0.44529
0.0003	-6.37861	24.5283	-6.24359		0.0003	-10.9556	4.08832	0.77541
0.0004	-4.85261	19.3383	-3.19186		0.0004	-2.41061	-10.5647	3.21681
0.0005	-13.0916	20.8683	1.38581		0.0005	-1.19061	-2.93568	2.91161
0.0006	-0.884615	17.8183	0.47021		0.0006	-16.1436	-8.12368	-7.46429
0.0007	-2.71661	23.6183	-6.24359		0.0007	-8.20961	-2.32468	-4.10739
0.0008	-7.59861	19.6483	9.62561		0.0008	-3.63161	9.57832	3.82721
0.0009	-2.71661	10.7983	0.77541		0.0009	3.08239	-6.90268	1.99611
0.001	-11.8716	18.1183	-3.80221		0.001	-4.54761	-2.32468	0.77541
0.0011	-2.41061	22.0883	-4.10739		0.0011	-2.71661	-4.15568	-4.10739
0.0012	-5.76761	13.8483	2.30131		0.0012	-5.15761	7.13832	6.57361
0.0013	-5.76761	24.2283	-2.88669		0.0013	-5.76761	-2.01968	-7.76949
0.0014	-0.274615	17.8183	0.16511		0.0014	-6.07261	3.46832	-8.07469
0.0015	-8.51462	16.5983	-0.44529		0.0015	-11.8716	-6.90268	-3.19186
0.0016	-3.63161	19.9483	-1.36079		0.0016	-4.54761	-6.59768	5.65821
0.0017	-4.85261	20.5583	1.08061		0.0017	0.0303852	-0.191683	-3.49704
0.0018	-6.68361	20.2583	-0.44529		0.0018	-7.29361	0.118317	-2.88669
0.0019	-10.6506	14.7683	-7.76949		0.0019	-2.10561	-5.37668	-4.10739
0.002	-4.54761	12.9383	6.26861		0.002	-9.12461	-3.85068	-2.27629
0.0021	-15.2286	15.9883	-1.05559		0.0021	-3.32661	1.02832	-4.41257
0.0022	-1.80061	12.3283	0.16511		0.0022	-7.29361	-3.54568	-1.97119
0.0023	-3.32661	15.9883	0.16511		0.0023	-5.46261	-7.51268	-1.97119
0.0024	-7.90461	12.3283	1.99611		0.0024	-6.37861	-10.2597	-2.88669
0.0025	-5.46261	15.3783	-6.54879		0.0025	-4.24161	-7.51268	3.21681
0.0026	-5.46261	13.8483	-7.76949		0.0026	-4.85261	2.85832	-0.75049
0.0027	-8.20961	16.8983	-1.36079		0.0027	-0.274615	-9.34368	-0.44529
0.0028	-8.51462	11.0983	2.60651		0.0028	-3.63161	0.118317	-1.36079
0.0029	-6.98861	17.8183	1.69091		0.0029	-3.63161	-9.03868	-4.10739
0.003	-7.90461	15.9883	0.77541		0.003	-8.20961	-5.98768	4.43751
0.0031	-0.884615	10.7983	-2.58149		0.0031	-0.884615	-0.191683	-4.41257
0.0032	-3.93661	8.04832	-7.15919		0.0032	-3.32661	-1.40968	-2.58149
0.0033	-4.54761	12.3283	1.38581		0.0033	-2.41061	2.24832	-2.27629
0.0034	-6.07261	6.52832	-1.36079		0.0034	-6.98861	-3.85068	-6.54879
0.0035	-5.15761	7.43832	2.30131		0.0035	-9.42962	-2.32468	1.08061
0.0036	-2.10561	1.63832	11.4566		0.0036	-12.4816	-3.54568	0.77541
0.0037	-6.98861	11.0983	1.08061		0.0037	-1.80061	4.69832	-2.27629
0.0038	-12.1766	13.2383	-0.14009		0.0038	-6.98861	-2.63068	1.69091
0.0039	-10.0406	19.6483	-2.27629		0.0039	-4.54761	-6.59768	3.21681
0.004	-10.9556	13.2383	-3.49704		0.004	-3.93661	0.118317	1.99611
0.0041	-17.0596	15.0683	1.08061		0.0041	-1.80061	-0.191683	6.26861
0.0042	-2.41061	9.87832	-3.19186		0.0042	-7.90461	-3.54568	-6.54879
0.0043	-4.54761	11.0983	-4.71774		0.0043	3.99739	-4.76668	0.77541
0.0044	-15.2286	12.9383	3.52201		0.0044	0.0303852	-2.01968	6.57361
0.0045	-8.20961	19.3383	-0.44529		0.0045	-5.15761	-14.2267	-0.14009
0.0046	-4.85261	11.4083	-3.80221		0.0046	-1.19061	-0.191683	5.65821
0.0047	-7.29361	9.26832	-5.02292		0.0047	-6.07261	-1.10468	0.47021
0.0048	-5.76761	16.5983	2.91161		0.0048	-4.54761	-11.1747	6.87861
0.0049	-13.7026	18.4283	-1.36079		0.0049	6.13439	6.82832	4.74271
0.005	-9.12461	8.04832	0.16511		0.005	4.60839	2.85832	5.35301
0.0051	-9.73561	15.9883	-1.97119		0.0051	-6.37861	2.85832	1.69091
0.0052	-6.98861	13.2383	-1.05559		0.0052	-0.579615	-8.73368	3.52201
0.0053	-7.59861	15.0683	-0.14009		0.0053	-16.1436	-5.98768	1.69091
0.0054	-8.51462	13.2383	-1.97119		0.0054	-8.81961	-8.12368	1.38581
0.0055	-9.42962	15.9883	-2.27629		0.0055	-4.24161	-5.37668	-1.05559
0.0056	-13.0916	10.4883	-0.44529		0.0056	-10.0406	-1.71468	-2.27629
0.0057	-2.71661	14.1583	-0.14009		0.0057	-7.90461	-9.34368	-4.10739
0.0058	-10.0406	13.8483	5.04791		0.0058	-2.10561	-7.20768	4.43751
0.0059	-14.6176	4.99832	2.91161		0.0059	-1.49561	0.418317	9.32061
0.006	-3.93661	7.43832	4.13231		0.006	-6.98861	-5.07168	5.65821
0.0061	-4.24161	15.3783	0.77541		0.0061	1.55639	-4.76668	-0.44529
0.0062	-9.12461	8.96832	-0.14009		0.0062	4.30339	-3.85068	1.38581
0.0063	-12.4816	5.91832	1.99611		0.0063	-4.54761	10.7983	1.08061
0.0064	-9.12461	8.65832	4.74271		0.0064	2.47139	-9.03868	0.47021
0.0065	-16.4486	15.0683	-2.58149		0.0065	-10.0406	-0.491683	-2.27629
0.0066	-14.3126	8.04832	4.13231		0.0066	-0.884615	-5.07168	-4.10739
0.0067	-17.0596	9.87832	-1.66599		0.0067	-3.02161	-2.63068	1.08061
0.0068	-17.9746	12.0183	-0.14009		0.0068	-6.37861	-3.54568	-3.49704
0.0069	-4.24161	3.16832	1.38581		0.0069	-1.49561	1.02832	-2.88669
0.007	-10.9556	15.6783	-4.41257		0.007	-8.20961	0.418317	3.21681
0.0071	-3.93661	7.74832	-4.10739		0.0071	-0.579615	-0.491683	2.60651
0.0072	-9.42962	9.26832	-3.49704		0.0072	-6.07261	-3.85068	1.69091
0.0073	-10.9556	5.60832	-3.49704		0.0073	1.86139	-0.799683	-1.36079
0.0074	-5.15761	12.3283	-9.90569		0.0074	-9.73561	-4.15568	-1.66599
0.0075	-11.5666	1.33832	-1.36079		0.0075	-5.76761	6.21832	-2.58149
0.0076	-15.5336	12.0183	-1.36079		0.0076	-5.46261	-2.32468	-0.14009
0.0077	-9.42962	4.99832	-1.66599		0.0077	-6.07261	3.46832	-2.58149
0.0078	-8.20961	7.43832	1.38581		0.0078	-0.579615	1.94832	0.16511
0.0079	-6.37861	12.6283	-5.63329		0.0079	2.77739	5.30832	-3.80221
0.008	-11.8716	12.0183	0.47021		0.008	-6.68361	-5.07168	6.87861
0.0081	-6.07261	8.04832	6.57361		0.0081	-2.71661	4.08832	6.87861
0.0082	-12.1766	9.26832	6.57361		0.0082	-9.12461	-3.85068	-3.49704
0.0083	-8.51462	13.5483	3.82721		0.0083	0.640385	-4.46168	-0.44529
0.0084	-13.7026	5.30832	4.74271		0.0084	-4.24161	-1.40968	-2.88669
0.0085	-13.7026	14.1583	2.30131		0.0085	-9.42962	-6.59768	4.43751
0.0086	-10.6506	2.55832	0.16511		0.0086	1.25139	-3.54568	1.38581
0.0087	-11.8716	4.38832	-5.93849		0.0087	-1.80061	2.24832	-1.97119
0.0088	-14.6176	7.43832	-5.63329		0.0088	0.335385	2.24832	1.38581
0.0089	-16.4486	7.13832	0.16511		0.0089	-8.20961	-0.191683	-1.97119
0.009	-11.5666	5.30832	2.30131		0.009	-0.884615	-2.01968	-6.54879
0.0091	-15.5336	-0.191683	-4.10739		0.0091	1.86139	1.94832	14.8136
0.0092	-12.7866	4.38832	-1.66599		0.0092	0.946385	4.08832	-0.44529
0.0093	-9.73561	-0.191683	1.69091		0.0093	-6.07261	-5.68168	3.52201
0.0094	-12.1766	10.4883	0.77541		0.0094	3.38739	1.63832	1.69091
0.0095	-12.4816	3.77832	-3.49704		0.0095	-2.10561	-1.10468	6.26861
0.0096	-15.8386	5.91832	-3.19186		0.0096	-4.54761	-5.37668	-3.19186
0.0097	-7.29361	3.16832	3.52201		0.0097	-4.85261	0.118317	2.30131
0.0098	-24.0786	2.55832	1.38581		0.0098	-5.15761	5.60832	2.30131
0.0099	-10.3456	5.60832	2.60651		0.0099	3.69239	0.418317	5.35301
0.01	-9.12461	7.13832	0.47021		0.01	-9.73561	-2.63068	0.77541
0.0101	-13.7026	-0.799683	-2.88669		0.0101	-0.579615	1.33832	2.91161
0.0102	-9.12461	-4.15568	1.08061		0.0102	-0.274615	-2.93568	2.60651
0.0103	-4.24161	3.77832	-2.88669		0.0103	-9.12461	-11.7857	-6.54879
0.0104	-7.90461	4.99832	-4.10739		0.0104	-5.76761	2.24832	4.13231
0.0105	-10.0406	-0.491683	2.30131		0.0105	-5.76761	2.85832	-1.97119
0.0106	-10.0406	5.60832	-2.27629		0.0106	-9.73561	-0.491683	5.96361
0.0107	-7.59861	1.02832	-0.14009		0.0107	-0.579615	-8.12368	-3.80221
0.0108	-3.93661	8.65832	-0.75049		0.0108	-4.54761	9.26832	-2.27629
0.0109	-9.12461	4.69832	-6.24359		0.0109	-9.12461	3.16832	1.08061
0.011	-6.98861	6.21832	-7.46429		0.011	-12.7866	-1.10468	-7.46429
0.0111	-3.93661	3.77832	1.69091		0.0111	-6.98861	-1.40968	9.93061
0.0112	-7.90461	10.7983	2.60651		0.0112	-8.20961	1.02832	5.35301
0.0113	-0.884615	5.30832	-4.10739		0.0113	-3.93661	1.33832	2.60651
0.0114	-8.20961	-3.85068	-1.05559		0.0114	-2.41061	4.99832	-0.14009
0.0115	-7.29361	4.08832	3.82721		0.0115	-4.54761	-5.98768	-7.15919
0.0116	-16.1436	12.6283	0.16511		0.0116	-8.81961	-9.95468	-1.05559
0.0117	-13.3976	5.30832	5.04791		0.0117	-2.10561	-1.71468	0.16511
0.0118	-11.8716	4.69832	3.82721		0.0118	-5.15761	0.728317	0.16511
0.0119	-12.4816	2.55832	7.79461		0.0119	-5.15761	3.77832	3.21681
0.012	-13.3976	8.65832	-8.37989		0.012	-2.41061	2.85832	-3.49704
0.0121	-7.29361	-1.10468	6.57361		0.0121	0.0303852	-6.59768	-4.10739
0.0122	-10.9556	-0.799683	-2.88669		0.0122	-4.54761	-2.93568	-2.88669
0.0123	-4.54761	3.46832	1.69091		0.0123	-3.32661	-1.10468	1.38581
0.0124	-8.81961	0.728317	-1.05559		0.0124	-1.49561	2.24832	5.96361
0.0125	-15.8386	3.16832	-3.80221		0.0125	-8.20961	-3.54568	1.38581
0.0126	-8.51462	-2.32468	7.48961		0.0126	-2.41061	-2.32468	-0.44529
0.0127	-13.7026	-4.46168	-1.66599		0.0127	-4.85261	3.16832	-5.02292
0.0128	-18.2796	-2.32468	3.82721		0.0128	-7.29361	-5.07168	0.77541
0.0129	-11.8716	-4.15568	5.65821		0.0129	-3.63161	-5.68168	-1.97119
0.013	-9.73561	5.60832	2.30131		0.013	-5.46261	0.728317	-1.97119
0.0131	-6.98861	1.94832	-1.66599		0.0131	-8.20961	1.02832	-3.80221
0.0132	-11.5666	2.24832	5.35301		0.0132	-7.90461	1.33832	-5.63329
0.0133	-9.12461	5.60832	-3.49704		0.0133	-10.3456	-2.63068	2.30131
0.0134	-9.42962	4.69832	-1.66599		0.0134	-5.15761	1.02832	1.69091
0.0135	-4.85261	7.13832	5.35301		0.0135	-2.41061	-2.93568	-1.05559
0.0136	-9.73561	3.16832	-2.27629		0.0136	4.30339	-0.799683	1.08061
0.0137	-7.59861	8.04832	4.13231		0.0137	-7.90461	-3.54568	1.69091
0.0138	-12.1766	20.8683	-1.97119		0.0138	-10.0406	-2.93568	1.99611
0.0139	-10.6506	12.9383	-0.75049		0.0139	-4.54761	5.30832	8.70961
0.014	-10.3456	13.5483	-0.75049		0.014	1.25139	-2.93568	4.13231
0.0141	-13.3976	17.5083	2.60651		0.0141	-2.71661	-2.63068	-0.44529
0.0142	-8.81961	15.9883	-4.10739		0.0142	-6.37861	-0.491683	4.74271
0.0143	-12.4816	14.7683	-0.75049		0.0143	-7.59861	-2.32468	-4.10739
0.0144	-8.81961	25.7483	10.5406		0.0144	-2.71661	-8.12368	-0.14009
0.0145	-2.41061	20.8683	2.30131		0.0145	0.335385	0.728317	-1.66599
0.0146	-6.68361	27.2783	-3.49704		0.0146	-7.59861	0.728317	-5.02292
0.0147	-11.2606	25.7483	-4.10739		0.0147	-3.93661	1.94832	-1.05559
0.0148	-9.12461	20.2583	-4.10739		0.0148	-12.4816	-2.63068	1.99611
0.0149	-15.2286	14.1583	1.08061		0.0149	-7.29361	-0.491683	-2.88669
0.015	-6.37861	26.6683	2.91161		0.015	-7.59861	-2.01968	1.99611
0.0151	-3.02161	20.8683	-0.75049		0.0151	-0.274615	-1.71468	-1.66599
0.0152	-11.2606	26.9683	1.38581		0.0152	-5.15761	1.02832	-3.49704
0.0153	0.335385	21.4783	1.08061		0.0153	-7.59861	0.118317	-2.58149
0.0154	-1.19061	14.7683	2.60651		0.0154	-5.76761	-2.63068	5.65821
0.0155	-11.2606	15.9883	2.91161		0.0155	-3.02161	1.63832	-5.32809
0.0156	-11.2606	23.9183	-1.66599		0.0156	-6.68361	0.418317	1.38581
0.0157	-6.68361	25.4483	2.30131		0.0157	-9.42962	2.24832	1.38581
0.0158	-10.0406	17.8183	-5.02292		0.0158	0.946385	-6.90268	-1.97119
0.0159	-10.0406	15.9883	3.21681		0.0159	-6.07261	-5.07168	-0.44529
0.016	-7.59861	8.04832	3.82721		0.016	-7.59861	-5.37668	-0.44529
0.0161	-3.93661	14.4583	3.21681		0.0161	-6.68361	-0.491683	-1.05559
0.0162	-3.93661	21.1783	8.09961		0.0162	-2.71661	-5.37668	-4.41257
0.0163	-6.37861	19.3383	-1.05559		0.0163	0.946385	-6.59768	-4.10739
0.0164	-8.51462	20.2583	5.65821		0.0164	4.91339	-5.68168	-0.44529
0.0165	0.946385	20.2583	-3.49704		0.0165	0.335385	-4.15568	1.38581
0.0166	-7.59861	12.0183	-0.44529		0.0166	1.25139	0.118317	-4.41257
0.0167	-5.46261	22.6983	1.38581		0.0167	-3.32661	-5.98768	-2.27629
0.0168	-6.98861	19.6483	-0.75049		0.0168	-10.6506	1.94832	2.91161
0.0169	-6.68361	15.0683	-4.10739		0.0169	-6.37861	-2.63068	1.69091
0.017	-6.07261	18.1183	-2.27629		0.017	-6.98861	-2.32468	-3.49704
0.0171	-7.29361	25.7483	-1.66599		0.0171	-6.98861	5.30832	1.69091
0.0172	-0.274615	20.2583	0.16511		0.0172	-4.54761	0.118317	-1.05559
0.0173	-11.5666	15.6783	-4.10739		0.0173	-2.10561	-2.93568	-5.93849
0.0174	-5.46261	13.5483	-5.63329		0.0174	-11.2606	-3.85068	3.21681
0.0175	0.335385	17.5083	3.21681		0.0175	-3.63161	5.91832	2.60651
0.0176	-15.5336	16.8983	4.74271		0.0176	-4.54761	4.69832	2.60651
0.0177	-3.02161	17.2083	-1.05559		0.0177	-11.2606	-4.15568	-3.80221
0.0178	-6.68361	9.26832	4.74271		0.0178	1.55639	1.63832	0.16511
0.0179	-5.46261	12.3283	4.43751		0.0179	-3.63161	2.55832	1.99611
0.018	-8.81961	19.9483	-7.15919		0.018	-5.46261	1.33832	-8.07469
0.0181	-6.98861	13.5483	-0.44529		0.0181	-3.02161	0.418317	1.08061
0.0182	-4.54761	7.74832	0.77541		0.0182	0.0303852	-6.59768	-3.19186
0.0183	-1.19061	24.8383	-8.37989		0.0183	-12.4816	4.38832	-0.44529
0.0184	-11.8716	15.0683	-2.88669		0.0184	-4.85261	-0.191683	-5.63329
0.0185	-10.0406	10.1883	12.0666		0.0185	-9.12461	-0.491683	-2.88669
0.0186	-7.59861	15.6783	0.47021		0.0186	-2.71661	-4.46168	1.08061
0.0187	-6.07261	19.0383	1.99611		0.0187	-10.3456	3.77832	-3.80221
0.0188	-3.32661	15.3783	1.38581		0.0188	-10.3456	0.418317	-7.76949
0.0189	-9.73561	11.0983	2.30131		0.0189	-4.85261	-9.03868	0.47021
0.019	-10.6506	12.6283	-1.66599		0.019	-1.80061	1.02832	-1.36079
0.0191	-6.68361	9.57832	1.69091		0.0191	3.69239	-1.71468	3.21681
0.0192	-10.6506	8.04832	-0.44529		0.0192	-4.85261	-2.63068	3.21681
0.0193	-3.63161	24.5283	-7.76949		0.0193	-3.32661	-2.01968	-6.24359
0.0194	-5.76761	18.1183	-2.58149		0.0194	-10.3456	4.99832	-0.44529
0.0195	-3.63161	15.6783	4.13231		0.0195	-6.37861	5.91832	6.57361
0.0196	-6.07261	16.5983	-2.88669		0.0196	-4.54761	0.418317	-0.75049
0.0197	-7.29361	16.5983	-1.66599		0.0197	-3.63161	3.46832	1.08061
0.0198	-6.37861	12.0183	-1.05559		0.0198	-6.68361	3.77832	-2.58149
0.0199	-10.0406	12.9383	-3.49704		0.0199	-6.98861	1.02832	-5.63329
0.02	-6.07261	13.2383	-1.66599		0.02	-9.12461	-3.24068	-0.14009
0.0201	-7.29361	12.6283	0.47021		0.0201	-6.37861	-0.191683	-3.49704
0.0202	3.69239	22.3983	4.13231		0.0202	-8.51462	-7.81868	0.77541
0.0203	-4.54761	5.60832	6.26861		0.0203	3.38739	-1.40968	-0.75049
0.0204	-3.02161	12.0183	4.74271		0.0204	-10.9556	0.118317	1.69091
0.0205	-5.46261	7.43832	1.08061		0.0205	-8.81961	2.24832	1.38581
0.0206	-9.42962	25.1383	0.47021		0.0206	-1.80061	-2.32468	1.38581
0.0207	-6.07261	4.38832	-1.97119		0.0207	-1.80061	-8.12368	3.21681
0.0208	-14.9236	10.4883	-0.14009		0.0208	-6.37861	-3.54568	-0.75049
0.0209	-0.274615	15.6783	-3.19186		0.0209	-7.29361	3.16832	3.21681
0.021	-10.6506	5.60832	5.65821		0.021	-3.63161	-3.24068	5.35301
0.0211	-8.51462	14.4583	-3.19186		0.0211	-6.68361	1.63832	9.32061
0.0212	-6.68361	11.4083	4.74271		0.0212	-6.07261	-1.10468	6.26861
0.0213	-10.9556	10.4883	0.16511		0.0213	-7.29361	-6.59768	0.47021
0.0214	-15.2286	7.43832	-0.14009		0.0214	-11.8716	-1.40968	-3.49704
0.0215	-9.73561	9.26832	-7.15919		0.0215	-10.6506	-5.07168	1.99611
0.0216	-5.46261	7.43832	2.91161		0.0216	-6.98861	-9.03868	2.60651
0.0217	-3.32661	5.30832	-5.02292		0.0217	3.08239	0.418317	0.77541
0.0218	-3.63161	13.5483	-7.46429		0.0218	-2.41061	1.02832	5.96361
0.0219	-7.29361	10.4883	3.52201		0.0219	-6.68361	-2.32468	6.87861
0.022	-6.98861	8.35832	1.69091		0.022	-7.29361	3.77832	2.60651
0.0221	-2.41061	9.26832	2.30131		0.0221	-8.81961	-7.20768	-4.41257
0.0222	-6.37861	12.3283	4.13231		0.0222	-11.2606	-1.71468	-5.32809
0.0223	1.86139	6.52832	3.82721		0.0223	-11.2606	2.85832	-5.93849
0.0224	-2.41061	2.24832	4.13231		0.0224	-15.8386	-1.40968	-8.07469
0.0225	0.640385	15.3783	1.99611		0.0225	-3.32661	4.69832	1.38581
0.0226	-5.76761	2.24832	1.38581		0.0226	-4.85261	2.55832	8.09961
0.0227	-6.68361	8.35832	2.60651		0.0227	-10.0406	-2.93568	-0.75049
0.0228	-6.68361	7.13832	3.21681		0.0228	0.0303852	4.08832	-4.71774
0.0229	-2.71661	7.43832	1.69091		0.0229	-6.98861	6.21832	-4.41257
0.023	-2.10561	-1.10468	-3.80221		0.023	0.640385	-0.191683	3.82721
0.0231	-8.20961	11.7083	-1.05559		0.0231	1.25139	5.60832	-2.58149
0.0232	-13.0916	5.60832	4.43751		0.0232	-12.7866	0.418317	-3.49704
0.0233	-10.6506	6.21832	0.47021		0.0233	-6.68361	-1.40968	1.38581
0.0234	-12.4816	4.38832	1.69091		0.0234	-10.6506	4.38832	-1.66599
0.0235	-12.1766	6.21832	4.43751		0.0235	-1.19061	-4.46168	-0.44529
0.0236	-10.0406	3.16832	-3.19186		0.0236	7.04939	-2.01968	-1.66599
0.0237	-0.884615	-0.491683	-2.88669		0.0237	-8.51462	-5.68168	-2.88669
0.0238	-3.02161	13.2383	-0.14009		0.0238	-8.81961	-1.40968	1.69091
0.0239	-9.73561	7.13832	-1.36079		0.0239	6.13439	0.418317	1.69091
0.024	1.55639	0.728317	-5.02292		0.024	2.16639	-4.15568	-2.58149
0.0241	-4.54761	4.69832	3.52201		0.0241	-8.81961	4.99832	-1.97119
0.0242	-10.0406	0.418317	-1.36079		0.0242	-3.32661	-0.191683	-4.10739
0.0243	-0.274615	5.30832	-1.36079		0.0243	2.77739	-0.491683	2.30131
0.0244	-3.63161	11.7083	-0.14009		0.0244	-6.07261	-3.85068	7.48961
0.0245	-4.85261	5.60832	0.16511		0.0245	-4.24161	1.94832	-7.46429
0.0246	-8.20961	8.65832	0.77541		0.0246	-5.46261	-6.90268	-9.60059
0.0247	-9.42962	2.85832	0.47021		0.0247	-5.76761	-2.63068	0.77541
0.0248	-6.68361	6.82832	2.60651		0.0248	-3.32661	-1.10468	1.38581
0.0249	-6.07261	2.55832	2.91161		0.0249	-3.93661	-5.68168	-0.75049
0.025	-2.10561	16.8983	-5.32809		0.025	-6.07261	-4.15568	0.47021
0.0251	0.640385	9.57832	2.60651		0.0251	-6.07261	-2.63068	0.47021
0.0252	-2.41061	7.43832	3.52201		0.0252	0.0303852	0.118317	-1.36079
0.0253	-5.76761	9.87832	0.47021		0.0253	-2.71661	-4.76668	0.47021
0.0254	2.77739	15.3783	-0.44529		0.0254	-7.59861	2.55832	-0.75049
0.0255	-5.15761	7.74832	6.26861		0.0255	-2.41061	-14.2267	6.87861
0.0256	-5.15761	10.7983	-2.58149		0.0256	0.0303852	-2.01968	1.08061
0.0257	-6.07261	12.6283	-1.97119		0.0257	-6.07261	-3.24068	-1.97119
0.0258	-8.20961	8.35832	2.60651		0.0258	7.65939	-1.71468	0.47021
0.0259	-10.3456	12.3283	0.77541		0.0259	-1.19061	3.16832	0.47021
0.026	0.0303852	5.91832	1.69091		0.026	-4.24161	1.33832	5.04791
0.0261	-5.76761	7.74832	1.69091		0.0261	3.99739	-5.37668	5.96361
0.0262	-2.41061	5.30832	3.21681		0.0262	-1.49561	-1.71468	5.65821
0.0263	-2.71661	6.21832	6.87861		0.0263	-6.98861	-3.85068	6.87861
0.0264	-3.93661	5.30832	5.04791		0.0264	-4.85261	-1.10468	1.99611
0.0265	-9.12461	5.60832	5.04791		0.0265	3.69239	5.91832	-2.27629
0.0266	-7.90461	11.0983	1.69091		0.0266	1.55639	-2.01968	3.82721
0.0267	-3.32661	9.87832	4.74271		0.0267	-6.07261	4.99832	5.04791
0.0268	-1.49561	6.21832	2.30131		0.0268	-8.20961	-6.29268	4.13231
0.0269	1.25139	9.57832	12.3716		0.0269	-6.98861	0.728317	-1.97119
0.027	-1.19061	8.04832	-1.36079		0.027	2.77739	1.02832	2.91161
0.0271	-4.54761	6.82832	1.38581		0.0271	1.55639	5.30832	1.38581
0.0272	-1.49561	10.4883	-2.58149		0.0272	3.08239	-6.90268	3.21681
0.0273	-4.85261	2.85832	6.26861		0.0273	2.16639	1.33832	3.82721
0.0274	-3.32661	11.0983	-1.97119		0.0274	7.04939	1.02832	-8.37989
0.0275	-7.59861	6.21832	1.08061		0.0275	-3.63161	6.82832	2.60651
0.0276	-8.20961	8.65832	-0.14009		0.0276	1.55639	-2.63068	6.87861
0.0277	-10.0406	2.24832	5.04791		0.0277	-2.10561	1.94832	-10.8213
0.0278	-8.51462	7.43832	2.30131		0.0278	-1.19061	-6.59768	2.60651
0.0279	-3.02161	6.82832	1.99611		0.0279	-2.10561	-3.54568	4.13231
0.028	-10.3456	8.96832	-0.75049		0.028	-2.10561	-4.15568	-1.05559
0.0281	0.640385	3.77832	-1.05559		0.0281	-2.10561	3.16832	-0.75049
0.0282	-5.76761	3.77832	1.99611		0.0282	-4.24161	-2.01968	-1.05559
0.0283	0.640385	5.60832	4.43751		0.0283	-5.15761	-0.799683	2.91161
0.0284	-5.76761	12.6283	9.93061		0.0284	0.0303852	0.728317	3.82721
0.0285	2.47139	1.33832	-1.97119		0.0285	-4.85261	-1.10468	4.13231
0.0286	-5.46261	8.35832	0.16511		0.0286	4.60839	-0.799683	2.60651
0.0287	-4.24161	6.52832	-2.27629		0.0287	-0.274615	-5.37668	0.47021
0.0288	2.77739	9.26832	1.38581		0.0288	3.69239	-8.42868	2.30131
0.0289	-6.07261	3.16832	1.38581		0.0289	-3.63161	-3.85068	3.82721
0.029	0.640385	7.74832	-2.88669		0.029	4.30339	3.77832	-1.05559
0.0291	-9.42962	6.21832	5.04791		0.0291	-0.884615	6.82832	-1.05559
0.0292	-8.20961	5.91832	3.21681		0.0292	-0.274615	-2.63068	5.35301
0.0293	-1.19061	4.08832	1.99611		0.0293	-2.10561	-5.07168	3.82721
0.0294	-6.07261	12.3283	1.38581		0.0294	-1.19061	2.55832	2.91161
0.0295	-1.49561	3.77832	-2.88669		0.0295	3.99739	-1.10468	-6.54879
0.0296	-6.07261	4.69832	-3.80221		0.0296	-6.37861	-0.491683	2.91161
0.0297	-11.5666	7.13832	2.30131		0.0297	0.640385	-1.10468	2.30131
0.0298	-5.76761	8.35832	-4.71774		0.0298	-5.46261	-1.10468	4.74271
0.0299	-7.59861	14.4583	-0.75049		0.0299	0.640385	1.94832	0.77541
0.03	-2.41061	8.96832	1.38581		0.03	-6.07261	3.16832	3.82721
0.0301	-7.90461	13.2383	1.08061		0.0301	-1.80061	-1.40968	1.69091
0.0302	-7.90461	10.1883	-1.66599		0.0302	-4.24161	-2.93568	1.38581
0.0303	-3.93661	11.0983	4.13231		0.0303	0.0303852	-3.24068	-0.44529
0.0304	-4.24161	6.82832	1.08061		0.0304	-2.10561	-10.2597	0.77541
0.0305	-9.42962	6.82832	1.69091		0.0305	-8.81961	0.418317	2.60651
0.0306	-13.7026	1.02832	-5.32809		0.0306	-6.07261	-2.93568	2.30131
0.0307	-1.19061	4.38832	1.99611		0.0307	-5.15761	-5.37668	2.60651
0.0308	-4.85261	4.99832	-4.10739		0.0308	-3.32661	5.60832	-0.75049
0.0309	3.69239	10.7983	-0.14009		0.0309	-5.15761	3.77832	-5.02292
0.031	-7.29361	7.13832	-3.80221		0.031	0.946385	-4.46168	-0.44529
0.0311	-8.51462	3.46832	0.77541		0.0311	-12.7866	-0.491683	1.08061
0.0312	-1.49561	7.43832	-1.05559		0.0312	-0.579615	1.02832	-0.14009
0.0313	-7.29361	-2.63068	1.69091		0.0313	-0.579615	-2.63068	-6.24359
0.0314	1.25139	7.74832	-7.15919		0.0314	-2.41061	-1.71468	-1.66599
0.0315	-9.12461	10.1883	-1.97119		0.0315	-5.46261	8.96832	-4.10739
0.0316	-4.85261	0.418317	5.04791		0.0316	-3.63161	-9.34368	2.30131
0.0317	-8.51462	3.46832	-2.27629		0.0317	-2.10561	-3.85068	-2.88669
0.0318	2.77739	3.77832	-2.88669		0.0318	1.25139	-5.68168	-2.27629
0.0319	-8.51462	1.63832	5.65821		0.0319	2.47139	-1.40968	-1.66599
0.032	-12.1766	-1.40968	-4.71774		0.032	-1.19061	-1.71468	5.35301
0.0321	0.640385	10.7983	-1.36079		0.0321	-2.10561	-3.24068	-2.27629
0.0322	-14.0076	6.52832	0.47021		0.0322	0.946385	6.52832	-6.85399
0.0323	1.55639	-1.10468	-0.75049		0.0323	4.30339	2.24832	-0.44529
0.0324	-17.0596	12.3283	0.77541		0.0324	-8.51462	-3.54568	2.30131
0.0325	-15.2286	12.0183	1.38581		0.0325	-0.579615	-2.93568	-4.10739
0.0326	-8.81961	22.0883	11.4566		0.0326	1.55639	1.63832	-1.97119
0.0327	-0.884615	9.26832	3.52201		0.0327	-8.81961	-4.76668	1.99611
0.0328	-7.59861	14.7683	-4.10739		0.0328	-5.15761	-0.491683	-1.97119
0.0329	0.0303852	11.0983	7.79461		0.0329	0.0303852	4.08832	-0.14009
0.033	-5.15761	19.0383	2.30131		0.033	-2.71661	-5.98768	-8.37989
0.0331	-8.20961	13.8483	-0.44529		0.0331	-5.46261	-5.98768	1.08061
0.0332	-0.579615	14.1583	-10.2109		0.0332	-4.85261	-1.71468	4.74271
0.0333	-6.37861	19.3383	2.60651		0.0333	-2.71661	-2.01968	0.77541
0.0334	1.55639	15.0683	-2.58149		0.0334	-7.59861	1.33832	1.69091
0.0335	-1.49561	10.1883	-1.05559		0.0335	-5.46261	-0.491683	9.32061
0.0336	-3.93661	6.82832	-0.14009		0.0336	-4.24161	0.118317	-1.36079
0.0337	-6.98861	12.0183	4.43751		0.0337	1.55639	0.728317	0.16511
0.0338	-9.12461	17.8183	3.82721		0.0338	-5.46261	6.21832	-2.88669
0.0339	-3.63161	15.0683	-0.14009		0.0339	-8.81961	-3.85068	-3.19186
0.034	-0.579615	15.6783	-0.75049		0.034	-5.76761	-3.24068	3.21681
0.0341	-9.42962	12.0183	-1.36079		0.0341	1.25139	-0.491683	0.47021
0.0342	-11.8716	10.4883	7.18461		0.0342	-10.0406	-8.12368	-4.41257
0.0343	-9.42962	12.0183	-1.66599		0.0343	-8.51462	0.418317	5.65821
0.0344	-7.90461	14.1583	5.65821		0.0344	-6.68361	-7.81868	6.26861
0.0345	-10.9556	10.4883	1.99611		0.0345	-8.20961	-5.37668	-7.15919
0.0346	-4.24161	12.0183	-3.49704		0.0346	0.640385	-2.32468	3.21681
0.0347	-9.73561	4.69832	-1.05559		0.0347	-10.3456	-2.32468	4.74271
0.0348	-12.1766	14.7683	2.91161		0.0348	-3.02161	-11.1747	-8.37989
0.0349	-1.19061	23.9183	0.47021		0.0349	-1.80061	6.52832	5.65821
0.035	-8.51462	20.5583	4.13231		0.035	4.30339	-4.46168	1.99611
0.0351	-4.54761	9.57832	1.99611		0.0351	3.38739	-0.799683	7.48961
0.0352	-9.12461	9.26832	-1.97119		0.0352	-2.10561	-6.59768	1.69091
0.0353	-8.81961	16.2883	6.87861		0.0353	0.335385	2.85832	-1.36079
0.0354	-9.12461	7.74832	1.69091		0.0354	-2.10561	-1.40968	-8.07469
0.0355	-2.41061	17.2083	-0.75049		0.0355	-3.02161	-6.29268	4.74271
0.0356	-12.1766	7.74832	8.40461		0.0356	-8.51462	-4.76668	2.91161
0.0357	-1.80061	13.5483	-4.10739		0.0357	-9.12461	-7.20768	-3.80221
0.0358	-2.10561	11.4083	1.38581		0.0358	-4.54761	-5.07168	-5.02292
0.0359	-6.07261	18.4283	-0.75049		0.0359	-6.07261	-0.191683	2.60651
0.036	-11.5666	17.5083	1.69091		0.036	-2.10561	-5.68168	1.99611
0.0361	-9.12461	12.6283	2.91161		0.0361	-4.85261	-11.1747	-4.10739
0.0362	-8.20961	15.6783	-4.71774		0.0362	-3.02161	-2.01968	7.79461
0.0363	-2.41061	19.3383	-2.27629		0.0363	-13.7026	2.24832	0.47021
0.0364	-4.54761	17.8183	2.91161		0.0364	3.08239	-5.07168	0.16511
0.0365	-8.20961	2.55832	-2.27629		0.0365	-3.63161	-4.76668	-1.66599
0.0366	-9.42962	7.74832	-6.85399		0.0366	-2.10561	2.55832	-8.37989
0.0367	-7.29361	6.52832	0.16511		0.0367	-5.76761	0.118317	-0.14009
0.0368	-3.63161	8.96832	-4.10739		0.0368	-6.07261	0.728317	-2.58149
0.0369	-2.10561	13.5483	-7.46429		0.0369	-1.49561	-2.63068	-4.71774
0.037	-14.0076	5.91832	8.70961		0.037	2.16639	10.1883	1.69091
0.0371	-6.37861	9.87832	9.62561		0.0371	-1.49561	-4.76668	0.77541
0.0372	-3.93661	8.04832	5.35301		0.0372	2.47139	2.55832	-4.41257
0.0373	-9.73561	12.6283	1.38581		0.0373	-2.10561	-3.24068	3.52201
0.0374	-0.274615	5.60832	-5.32809		0.0374	-7.29361	-0.191683	-2.58149
0.0375	-7.29361	19.0383	-1.66599		0.0375	-2.10561	0.728317	-1.97119
0.0376	-6.98861	11.4083	-2.58149		0.0376	-1.80061	-2.63068	-2.27629
0.0377	-4.85261	17.5083	-2.27629		0.0377	-2.71661	0.728317	2.30131
0.0378	-2.71661	10.7983	-4.10739		0.0378	-10.9556	4.69832	-2.27629
0.0379	-6.98861	21.4783	1.38581		0.0379	0.0303852	-4.15568	10.2356
0.038	-10.9556	13.5483	1.08061		0.038	0.0303852	-6.29268	3.82721
0.0381	-5.15761	20.8683	3.82721		0.0381	-4.24161	-5.07168	5.04791
0.0382	0.0303852	17.8183	-13.873		0.0382	1.25139	-1.10468	4.43751
0.0383	-6.37861	15.0683	-1.36079		0.0383	-4.24161	-3.54568	5.35301
0.0384	-5.15761	22.6983	-0.14009		0.0384	-6.98861	-9.64968	0.16511
0.0385	-0.884615	26.0583	-1.36079		0.0385	-3.93661	-0.191683	0.16511
0.0386	-4.54761	18.7283	-4.10739		0.0386	-9.12461	-1.40968	4.43751
0.0387	-4.85261	22.0883	0.77541		0.0387	4.30339	-0.191683	0.77541
0.0388	1.86139	16.8983	-1.36079		0.0388	-14.3126	1.63832	0.47021
0.0389	-9.73561	12.6283	-0.75049		0.0389	-1.49561	0.728317	-8.37989
0.039	-0.274615	15.9883	-2.88669		0.039	-1.19061	4.69832	-3.49704
0.0391	-2.10561	21.7883	6.57361		0.0391	-1.49561	-4.76668	0.47021
0.0392	-4.85261	12.6283	-5.93849		0.0392	-4.85261	7.13832	1.38581
0.0393	-5.76761	15.6783	-4.10739		0.0393	-5.76761	-5.07168	10.8466
0.0394	-5.46261	12.9383	4.43751		0.0394	1.55639	-5.07168	-0.75049
0.0395	-0.274615	20.2583	2.30131		0.0395	-3.02161	-2.32468	-0.75049
0.0396	3.69239	8.65832	-0.44529		0.0396	0.946385	-7.20768	4.43751
0.0397	-11.5666	3.46832	4.74271		0.0397	-5.46261	0.418317	2.30131
0.0398	-9.42962	15.0683	-4.41257		0.0398	-5.15761	-0.191683	-0.14009
0.0399	-2.71661	14.1583	1.38581		0.0399	0.946385	-1.10468	1.99611
0.04	-7.29361	17.2083	4.74271		0.04	-11.5666	3.46832	2.60651
0.0401	1.25139	19.6483	2.30131		0.0401	-4.24161	-2.01968	-0.75049
0.0402	-4.54761	11.7083	5.35301		0.0402	-0.274615	-0.491683	-2.27629
0.0403	-3.93661	17.2083	-4.41257		0.0403	-6.37861	-5.07168	0.16511
0.0404	-2.71661	17.2083	-2.88669		0.0404	-0.579615	-0.191683	1.99611
0.0405	-7.59861	6.21832	-2.58149		0.0405	0.335385	4.99832	4.13231
0.0406	-15.8386	11.7083	3.21681		0.0406	-3.32661	-4.46168	9.01561
0.0407	-3.63161	11.0983	3.82721		0.0407	-0.579615	4.08832	-2.58149
0.0408	-4.85261	12.6283	1.38581		0.0408	-2.41061	-2.01968	-1.66599
0.0409	-13.0916	11.7083	2.30131		0.0409	-3.32661	3.77832	3.52201
0.041	-5.46261	15.0683	-3.49704		0.041	0.946385	-0.491683	-1.66599
0.0411	-6.98861	24.2283	0.47021		0.0411	0.0303852	5.91832	-1.66599
0.0412	-7.29361	11.4083	-4.41257		0.0412	-0.579615	-5.37668	-2.58149
0.0413	-4.24161	13.5483	-1.36079		0.0413	-3.63161	2.85832	-3.80221
0.0414	-9.42962	10.1883	-1.36079		0.0414	0.335385	1.94832	-14.7884
0.0415	-15.2286	17.5083	-0.75049		0.0415	3.08239	0.118317	3.82721
0.0416	-10.0406	9.26832	0.77541		0.0416	4.30339	-5.37668	2.30131
0.0417	-3.32661	5.60832	1.69091		0.0417	-2.41061	-10.5647	0.47021
0.0418	-12.1766	4.99832	-5.32809		0.0418	-1.19061	3.77832	-4.10739
0.0419	-12.1766	4.38832	2.60651		0.0419	-1.49561	-6.90268	3.52201
0.042	-5.46261	13.8483	-1.36079		0.042	1.86139	-9.95468	1.08061
0.0421	-10.6506	13.5483	1.08061		0.0421	0.335385	-1.71468	4.43751
0.0422	-3.32661	8.04832	-4.41257		0.0422	1.55639	-0.191683	0.47021
0.0423	-10.9556	9.87832	1.08061		0.0423	-4.85261	-5.37668	-0.14009
0.0424	-16.1436	13.2383	4.43751		0.0424	4.30339	-1.40968	0.47021
0.0425	-4.85261	10.1883	3.82721		0.0425	2.16639	1.33832	2.91161
0.0426	-5.76761	18.1183	-4.10739		0.0426	2.16639	-8.73368	2.91161
0.0427	-10.3456	13.5483	2.91161		0.0427	0.335385	2.24832	-1.36079
0.0428	-2.10561	13.5483	-1.36079		0.0428	-1.49561	1.33832	-0.14009
0.0429	-8.51462	15.3783	5.96361		0.0429	-6.68361	-7.51268	7.18461
0.043	-6.98861	20.5583	-4.71774		0.043	4.91339	1.33832	1.99611
0.0431	-3.93661	12.0183	9.62561		0.0431	-3.02161	1.94832	1.99611
0.0432	-3.02161	4.08832	1.08061		0.0432	-8.20961	-13.9217	-0.44529
0.0433	-6.37861	10.4883	-2.58149		0.0433	-7.59861	-2.01968	1.69091
0.0434	-1.80061	12.6283	2.30131		0.0434	-0.579615	0.728317	-0.14009
0.0435	-3.02161	3.46832	-9.60059		0.0435	-6.07261	1.33832	-2.58149
0.0436	-5.15761	10.7983	6.87861		0.0436	-4.85261	6.21832	2.60651
0.0437	-7.59861	15.6783	4.43751		0.0437	-11.8716	-0.491683	-3.80221
0.0438	-3.02161	14.7683	-1.97119		0.0438	-1.80061	2.24832	-2.27629
0.0439	-6.98861	15.3783	-2.27629		0.0439	-3.63161	4.08832	-4.71774
0.044	2.77739	6.82832	0.16511		0.044	1.55639	-2.93568	5.65821
0.0441	-16.1436	4.08832	-0.44529		0.0441	-4.24161	1.33832	3.21681
0.0442	-8.81961	9.57832	2.30131		0.0442	-7.59861	4.99832	-4.71774
0.0443	-4.85261	4.69832	4.43751		0.0443	-8.20961	4.69832	4.43751
0.0444	-2.41061	12.0183	-0.44529		0.0444	-11.2606	-9.95468	-12.042
0.0445	2.47139	13.5483	6.26861		0.0445	-10.0406	7.13832	-2.27629
0.0446	-3.32661	14.7683	1.99611		0.0446	-3.93661	-1.10468	-8.07469
0.0447	-3.63161	12.0183	-0.14009		0.0447	-5.76761	5.30832	4.43751
0.0448	-5.15761	19.9483	-1.05559		0.0448	-0.274615	-8.73368	-1.97119
0.0449	5.82839	14.1583	0.16511		0.0449	-6.07261	-1.40968	6.87861
0.045	-7.29361	19.9483	-2.88669		0.045	-4.24161	2.85832	0.77541
0.0451	-10.0406	19.6483	6.57361		0.0451	-10.3456	-3.54568	0.16511
0.0452	-1.49561	20.2583	1.99611		0.0452	-1.19061	-2.93568	4.43751
0.0453	-1.49561	17.2083	-7.76949		0.0453	-7.29361	-2.01968	1.08061
0.0454	-4.54761	23.3083	3.21681		0.0454	-3.02161	-0.491683	8.70961
0.0455	-12.1766	18.7283	-4.10739		0.0455	-8.20961	-4.15568	5.65821
0.0456	-7.29361	13.2383	-0.44529		0.0456	-14.9236	-0.491683	-1.66599
0.0457	-9.73561	14.1583	6.87861		0.0457	-4.24161	-2.93568	0.77541
0.0458	0.946385	15.6783	-1.66599		0.0458	-8.51462	1.33832	3.82721
0.0459	1.55639	19.0383	2.60651		0.0459	-1.19061	-3.54568	-4.71774
0.046	-3.02161	16.8983	3.52201		0.046	4.60839	1.94832	-6.54879
0.0461	-6.68361	20.8683	-0.44529		0.0461	-8.51462	-0.491683	-2.27629
0.0462	-4.54761	20.8683	8.70961		0.0462	-6.68361	5.30832	-10.8213
0.0463	-6.07261	13.2383	1.99611		0.0463	-1.19061	8.04832	9.01561
0.0464	-4.24161	23.0083	1.08061		0.0464	-4.85261	-4.46168	2.60651
0.0465	-8.51462	10.4883	13.2876		0.0465	-6.37861	1.02832	-4.71774
0.0466	-2.71661	19.3383	-6.85399		0.0466	-8.20961	-5.98768	8.70961
0.0467	-8.81961	17.8183	-2.88669		0.0467	-7.29361	-0.799683	-0.75049
0.0468	-4.24161	11.4083	-0.14009		0.0468	-3.02161	4.38832	-1.66599
0.0469	-10.9556	15.6783	-0.44529		0.0469	-7.90461	1.94832	-8.37989
0.047	-14.0076	19.6483	0.77541		0.047	-5.76761	-2.01968	1.08061
0.0471	-5.46261	22.0883	1.99611		0.0471	2.47139	0.418317	5.65821
0.0472	-4.85261	20.2583	-1.36079		0.0472	-6.68361	2.24832	1.99611
0.0473	-13.7026	21.1783	1.99611		0.0473	-8.51462	-1.10468	-1.05559
0.0474	-6.68361	14.7683	-1.66599		0.0474	-7.29361	-2.63068	5.65821
0.0475	-5.15761	23.0083	1.08061		0.0475	-2.10561	13.5483	-3.19186
0.0476	-1.49561	24.8383	5.04791		0.0476	1.86139	-0.191683	-8.68499
0.0477	-3.93661	25.7483	-4.10739		0.0477	-1.19061	2.85832	2.30131
0.0478	-7.90461	15.3783	1.38581		0.0478	-8.81961	4.99832	1.08061
0.0479	-9.12461	13.8483	1.38581		0.0479	-6.68361	-0.799683	-3.19186
0.048	-2.71661	17.8183	-4.71774		0.048	-2.10561	-7.51268	4.74271
0.0481	1.25139	20.5583	3.52201		0.0481	-9.73561	4.69832	-2.58149
0.0482	-3.02161	10.7983	-4.41257		0.0482	2.47139	-0.799683	-3.49704
0.0483	-0.884615	15.3783	-0.14009		0.0483	3.99739	-5.07168	-4.10739
0.0484	-4.54761	17.5083	-2.58149		0.0484	0.0303852	2.85832	1.08061
0.0485	-8.20961	12.3283	2.60651		0.0485	-0.884615	-3.24068	0.77541
0.0486	-3.32661	21.7883	-1.36079		0.0486	-2.10561	0.118317	8.40461
0.0487	-3.93661	15.9883	-4.10739		0.0487	-3.32661	-2.63068	0.16511
0.0488	-0.884615	19.9483	-1.36079		0.0488	-9.73561	-2.93568	-0.44529
0.0489	-10.6506	12.3283	2.30131		0.0489	-12.4816	1.63832	8.40461
0.049	-3.63161	12.3283	1.99611		0.049	-7.29361	-9.03868	1.99611
0.0491	-6.68361	21.4783	5.04791		0.0491	-2.71661	-6.59768	3.52201
0.0492	-7.59861	14.7683	8.70961		0.0492	-1.80061	-1.10468	1.99611
0.0493	-3.32661	21.1783	4.13231		0.0493	0.640385	1.33832	4.13231
0.0494	-6.98861	21.1783	-2.58149		0.0494	-1.49561	-0.799683	-0.44529
0.0495	-0.884615	21.1783	5.65821		0.0495	-5.46261	-7.51268	-1.36079
0.0496	-14.3126	24.5283	-3.80221		0.0496	-3.32661	-6.90268	3.82721
0.0497	-1.80061	16.5983	-2.88669		0.0497	-1.19061	-5.98768	-12.3471
0.0498	-0.274615	21.4783	4.74271		0.0498	-11.8716	1.02832	-1.05559
0.0499	-1.19061	20.8683	-8.68499		0.0499	-5.46261	1.33832	-0.14009
0.05	1.25139	14.7683	3.21681		0.05	-5.46261	-6.29268	0.77541
0.0501	-12.7866	12.0183	-0.44529		0.0501	0.946385	2.85832	4.74271
0.0502	-8.81961	14.4583	-1.05559		0.0502	-7.29361	-1.71468	3.52201
0.0503	-0.579615	10.4883	-3.80221		0.0503	-5.15761	1.02832	-3.49704
0.0504	-5.15761	14.1583	-1.66599		0.0504	-7.29361	-2.32468	2.91161
0.0505	-5.46261	6.52832	-0.75049		0.0505	-3.32661	0.418317	3.82721
0.0506	-11.8716	11.7083	-3.49704		0.0506	-4.85261	1.33832	3.82721
0.0507	-11.2606	10.4883	-0.44529		0.0507	-5.46261	6.82832	-3.49704
0.0508	1.86139	11.0983	0.47021		0.0508	-7.29361	5.30832	3.21681
0.0509	-3.02161	9.57832	0.77541		0.0509	0.335385	1.94832	2.30131
0.051	-4.24161	11.7083	3.21681		0.051	0.335385	-0.491683	-5.63329
0.0511	-5.15761	12.9383	-1.66599		0.0511	-3.63161	-3.24068	1.38581
0.0512	-11.8716	11.7083	-5.63329		0.0512	-3.63161	-1.10468	-3.49704
0.0513	-10.9556	8.65832	-1.97119		0.0513	4.91339	9.57832	1.38581
0.0514	-6.68361	6.52832	-2.27629		0.0514	-2.71661	2.24832	6.26861
0.0515	-7.90461	10.4883	0.77541		0.0515	-14.9236	0.118317	-1.66599
0.0516	-9.12461	7.13832	0.77541		0.0516	-10.6506	-6.90268	-2.88669
0.0517	-9.73561	7.13832	0.77541		0.0517	-2.41061	5.91832	-8.07469
0.0518	-3.32661	7.13832	-4.10739		0.0518	0.640385	-2.32468	-3.49704
0.0519	-5.76761	15.6783	-11.4316		0.0519	-1.19061	-0.799683	-2.88669
0.052	-5.76761	8.04832	4.43751		0.052	6.74439	8.35832	-0.75049
0.0521	-6.07261	7.13832	-2.27629		0.0521	-2.41061	-0.799683	5.65821
0.0522	-8.51462	8.65832	-3.19186		0.0522	-6.37861	-2.32468	-0.75049
0.0523	-8.20961	5.30832	7.79461		0.0523	-4.54761	-1.71468	7.79461
0.0524	-15.2286	14.4583	5.96361		0.0524	-2.71661	-1.40968	-4.10739
0.0525	-5.76761	15.3783	6.26861		0.0525	-10.6506	-8.73368	-5.93849
0.0526	-7.29361	15.9883	-0.75049		0.0526	-3.93661	-0.491683	0.16511
0.0527	-10.0406	5.91832	1.99611		0.0527	-3.02161	-0.191683	4.74271
0.0528	-9.73561	6.52832	-3.80221		0.0528	-4.85261	-2.32468	-3.49704
0.0529	-9.12461	4.69832	-8.68499		0.0529	-0.884615	1.33832	-4.10739
0.053	0.0303852	6.82832	-3.49704		0.053	-0.579615	0.118317	-1.05559
0.0531	-8.20961	12.0183	-4.10739		0.0531	-10.9556	2.24832	6.26861
0.0532	-7.59861	8.65832	-1.97119		0.0532	-11.8716	1.94832	-1.36079
0.0533	-11.2606	8.65832	1.99611		0.0533	-5.46261	-2.01968	-4.41257
0.0534	-4.24161	12.0183	-1.36079		0.0534	-6.98861	-2.32468	3.21681
0.0535	-12.7866	3.46832	-2.88669		0.0535	-10.6506	-0.191683	-2.27629
0.0536	-6.37861	5.91832	-6.24359		0.0536	-6.37861	-3.85068	-1.36079
0.0537	-9.73561	10.4883	-1.05559		0.0537	-5.15761	-2.32468	-1.97119
0.0538	0.640385	1.63832	-2.58149		0.0538	-5.46261	-7.20768	2.91161
0.0539	-14.3126	-1.10468	-4.71774		0.0539	-6.98861	0.728317	6.26861
0.054	-5.76761	5.30832	4.13231		0.054	-7.90461	-3.54568	0.77541
0.0541	-4.85261	8.96832	-4.10739		0.0541	-0.274615	0.418317	-2.88669
0.0542	-5.15761	9.57832	-1.66599		0.0542	-9.12461	0.118317	1.69091
0.0543	-15.8386	2.55832	-0.14009		0.0543	-0.274615	-3.54568	5.35301
0.0544	-12.7866	9.26832	-2.58149		0.0544	-2.71661	-3.54568	-1.05559
0.0545	-9.73561	2.85832	-0.14009		0.0545	-11.2606	6.21832	6.26861
0.0546	-3.93661	-2.63068	0.47021		0.0546	6.13439	4.99832	1.38581
0.0547	-17.0596	8.35832	-1.66599		0.0547	3.38739	3.77832	-2.27629
0.0548	-11.8716	1.02832	8.40461		0.0548	-6.07261	-6.29268	1.38581
0.0549	-21.3316	6.52832	-1.66599		0.0549	-8.51462	-2.93568	0.77541
0.055	-13.3976	3.16832	2.60651		0.055	-13.0916	4.08832	-2.27629
0.0551	-11.5666	-0.191683	2.60651		0.0551	-1.80061	-0.191683	-1.66599
0.0552	-10.3456	2.24832	-8.07469		0.0552	-3.63161	1.33832	-7.76949
0.0553	-12.4816	10.7983	-3.19186		0.0553	0.335385	-9.95468	1.38581
0.0554	-10.0406	2.55832	2.60651		0.0554	1.55639	-0.799683	0.47021
0.0555	-12.1766	3.77832	7.48961		0.0555	-5.15761	3.16832	2.60651
0.0556	-10.6506	6.52832	1.38581		0.0556	-3.93661	-2.01968	3.82721
0.0557	-12.4816	10.1883	1.08061		0.0557	-6.07261	0.118317	-1.36079
0.0558	-11.2606	6.52832	-0.44529		0.0558	-10.0406	2.24832	-2.27629
0.0559	-13.3976	2.85832	1.38581		0.0559	-9.12461	3.16832	0.16511
0.056	-10.9556	4.99832	-3.80221		0.056	-5.15761	-2.93568	6.57361
0.0561	-12.4816	-0.191683	-0.44529		0.0561	1.55639	4.69832	0.47021
0.0562	-25.6046	-7.20768	-1.66599		0.0562	0.335385	-1.71468	1.38581
0.0563	-18.5856	-0.491683	0.47021		0.0563	-6.07261	-1.71468	8.09961
0.0564	-13.7026	0.728317	6.87861		0.0564	-2.71661	-7.81868	-0.75049
0.0565	-24.6886	10.7983	-3.49704		0.0565	4.91339	-9.64968	-0.44529
0.0566	-16.4486	1.63832	-2.27629		0.0566	-1.80061	0.118317	1.38581
0.0567	-15.5336	8.04832	-2.58149		0.0567	-7.29361	1.63832	4.74271
0.0568	-14.6176	-3.85068	0.77541		0.0568	-3.93661	-0.191683	-3.80221
0.0569	-12.1766	-1.71468	0.16511		0.0569	-4.24161	-4.15568	4.13231
0.057	-5.46261	2.55832	-0.44529		0.057	-1.80061	-7.81868	-0.75049
0.0571	-20.7216	4.08832	1.99611		0.0571	-8.20961	1.94832	-1.66599
0.0572	-18.2796	-3.24068	0.47021		0.0572	-3.02161	-5.98768	3.21681
0.0573	-9.42962	-0.191683	7.18461		0.0573	-3.02161	-3.24068	8.40461
0.0574	-15.8386	9.26832	-1.05559		0.0574	-6.07261	3.77832	-1.66599
0.0575	-5.76761	-2.93568	0.47021		0.0575	-7.90461	-4.15568	4.43751
0.0576	-20.4166	4.38832	-0.44529		0.0576	-8.81961	-5.37668	1.99611
0.0577	-14.3126	9.57832	-5.63329		0.0577	-1.80061	6.21832	6.87861
0.0578	-9.73561	1.33832	-3.80221		0.0578	-0.884615	-5.07168	-1.97119
0.0579	-14.0076	1.33832	2.91161		0.0579	-2.10561	3.46832	-4.10739
0.058	-15.8386	3.16832	-5.63329		0.058	-5.76761	1.94832	11.4566
0.0581	-14.9236	-1.71468	-2.27629		0.0581	-1.80061	0.118317	-2.58149
0.0582	-12.7866	2.24832	14.2036		0.0582	-14.9236	2.24832	2.91161
0.0583	-12.4816	2.24832	-0.75049		0.0583	-3.02161	-2.32468	3.21681
0.0584	-5.76761	3.77832	0.77541		0.0584	-9.42962	-1.40968	5.04791
0.0585	-11.5666	3.77832	1.08061		0.0585	-4.54761	-1.40968	2.30131
0.0586	-19.5006	-7.20768	-4.41257		0.0586	-6.07261	-2.93568	-0.14009
0.0587	-9.73561	-4.15568	-0.44529		0.0587	-0.579615	1.33832	-3.49704
0.0588	-20.7216	1.02832	4.74271		0.0588	-2.71661	-5.07168	-0.14009
0.0589	-18.8906	0.118317	0.16511		0.0589	-11.8716	1.33832	9.32061
0.059	-16.7546	-1.71468	5.04791		0.059	1.86139	4.08832	-7.15919
0.0591	-17.9746	-1.71468	-1.36079		0.0591	1.25139	-1.71468	-1.05559
0.0592	-17.9746	-2.01968	2.60651		0.0592	-7.29361	0.728317	0.16511
0.0593	-4.54761	3.77832	4.43751		0.0593	-0.274615	5.91832	3.82721
0.0594	-14.0076	4.08832	-1.97119		0.0594	1.55639	-2.01968	3.52201
0.0595	-20.1116	5.91832	0.77541		0.0595	-4.85261	4.69832	1.08061
0.0596	-15.2286	10.7983	1.99611		0.0596	-7.29361	-5.37668	-0.44529
0.0597	-18.5856	0.728317	-4.10739		0.0597	1.86139	-7.51268	-4.71774
0.0598	-11.8716	1.33832	-3.19186		0.0598	-8.51462	-1.71468	0.47021
0.0599	-14.3126	6.82832	2.91161		0.0599	-2.10561	-4.76668	1.08061
0.06	-10.6506	2.85832	-1.36079		0.06	0.640385	0.118317	4.13231
0.0601	-19.5006	0.728317	3.21681		0.0601	-4.24161	1.94832	-2.27629
0.0602	-16.1436	1.94832	-13.873		0.0602	4.91339	-1.10468	2.30131
0.0603	-12.1766	-1.10468	-2.88669		0.0603	-8.51462	3.77832	4.13231
0.0604	-16.7546	3.46832	2.30131		0.0604	2.16639	3.77832	4.43751
0.0605	-18.8906	-4.15568	-3.80221		0.0605	-8.20961	-2.93568	2.91161
0.0606	-11.8716	9.87832	-1.97119		0.0606	-3.63161	-9.64968	2.60651
0.0607	-16.1436	-1.40968	-3.49704		0.0607	1.25139	0.418317	3.21681
0.0608	-16.7546	1.94832	-1.66599		0.0608	-7.90461	3.16832	2.60651
0.0609	-10.6506	-10.2597	2.30131		0.0609	-7.90461	1.63832	-12.9575
0.061	-17.0596	3.16832	3.21681		0.061	-6.98861	0.118317	5.04791
0.0611	-16.7546	-5.98768	-1.97119		0.0611	-1.49561	-1.10468	-2.58149
0.0612	-17.9746	1.02832	0.16511		0.0612	-2.41061	1.02832	-0.44529
0.0613	-21.0266	-1.40968	-0.44529		0.0613	2.16639	1.02832	1.99611
0.0614	-18.2796	-7.20768	-0.14009		0.0614	-6.07261	-8.73368	-3.80221
0.0615	-17.0596	5.30832	-1.66599		0.0615	-2.41061	-5.68168	-4.41257
0.0616	-21.0266	4.38832	0.16511		0.0616	-2.41061	7.74832	-1.97119
0.0617	-18.8906	-3.24068	-3.19186		0.0617	-5.46261	1.63832	-1.66599
0.0618	-15.8386	1.02832	-20.5864		0.0618	-9.73561	-1.71468	-1.97119
0.0619	-18.8906	8.35832	-66.6684		0.0619	2.16639	1.94832	-0.75049
0.062	-14.3126	-0.191683	-338.577		0.062	-0.579615	-2.32468	3.21681
0.0621	-24.3836	-5.68168	-43.4754		0.0621	1.86139	-3.24068	1.99611
0.0622	-19.1956	-2.32468	181.743		0.0622	-0.579615	0.418317	-0.44529
0.0623	-22.2476	-7.51268	160.383		0.0623	-2.41061	3.77832	1.38581
0.0624	-18.5856	-2.63068	60.5896		0.0624	-5.15761	-0.799683	3.82721
0.0625	-18.5856	3.16832	17.8656		0.0625	-6.37861	-0.491683	-2.88669
0.0626	-19.8056	4.08832	7.18461		0.0626	0.335385	-4.76668	-1.05559
0.0627	-24.9936	-8.73368	-1.97119		0.0627	-7.29361	3.77832	-2.58149
0.0628	-23.7736	1.02832	-7.46429		0.0628	3.99739	-1.10468	-7.46429
0.0629	-16.1436	-2.93568	-0.75049		0.0629	-6.68361	2.24832	-9.29539
0.063	-14.6176	8.04832	-4.71774		0.063	-6.68361	5.60832	-2.58149
0.0631	-22.2476	-2.01968	-8.07469		0.0631	-9.12461	-0.191683	-2.27629
0.0632	-19.1956	-8.12368	3.82721		0.0632	-7.90461	0.418317	1.99611
0.0633	-19.5006	-2.32468	-4.71774		0.0633	-1.49561	8.04832	3.82721
0.0634	-19.5006	5.60832	-4.10739		0.0634	-5.46261	-2.32468	5.65821
0.0635	-8.51462	3.46832	2.91161		0.0635	-2.71661	3.46832	-0.14009
0.0636	-20.7216	-4.76668	-1.66599		0.0636	-9.12461	-7.20768	-1.05559
0.0637	-20.4166	3.16832	0.47021		0.0637	-10.6506	3.16832	-5.63329
0.0638	-16.7546	2.55832	-2.88669		0.0638	-0.579615	2.85832	8.70961
0.0639	-16.4486	5.30832	2.60651		0.0639	-4.24161	-4.76668	1.38581
0.064	-15.8386	2.55832	0.77541		0.064	-6.07261	-5.07168	5.96361
0.0641	-17.0596	1.94832	0.47021		0.0641	-7.90461	-3.85068	2.91161
0.0642	-0.579615	3.46832	-1.05559		0.0642	-1.80061	-1.71468	-1.05559
0.0643	-14.6176	3.77832	-1.36079		0.0643	-7.59861	-3.85068	-5.02292
0.0644	-9.73561	8.04832	-2.27629		0.0644	-6.37861	-2.63068	-3.19186
0.0645	-9.12461	1.33832	2.60651		0.0645	-13.3976	-2.93568	-4.71774
0.0646	-21.9426	0.118317	1.38581		0.0646	-11.5666	-2.63068	-1.66599
0.0647	-12.4816	-0.191683	-2.27629		0.0647	-12.1766	-0.491683	-1.05559
0.0648	-6.68361	-0.799683	1.08061		0.0648	-10.3456	-8.42868	0.47021
0.0649	-14.6176	-2.32468	0.16511		0.0649	-2.41061	0.118317	8.40461
0.065	-12.4816	-1.10468	-8.37989		0.065	-6.37861	-2.01968	-1.97119
0.0651	-3.93661	13.5483	-1.97119		0.0651	-5.76761	2.55832	-3.80221
0.0652	-9.73561	-2.63068	-0.44529		0.0652	-6.98861	-4.46168	-2.88669
0.0653	-10.6506	9.26832	1.38581		0.0653	-6.37861	-0.491683	-2.27629
0.0654	-6.37861	5.30832	-1.05559		0.0654	-1.49561	0.418317	7.79461
0.0655	-21.0266	-2.63068	0.47021		0.0655	-10.3456	-3.85068	0.47021
0.0656	-16.1436	7.43832	-7.15919		0.0656	-13.0916	1.33832	8.09961
0.0657	-20.4166	8.04832	1.99611		0.0657	-4.24161	-1.71468	4.13231
0.0658	-17.3646	-5.07168	-7.46429		0.0658	-12.1766	6.52832	0.16511
0.0659	-21.3316	-1.71468	8.09961		0.0659	-8.20961	0.118317	1.99611
0.066	-14.9236	2.55832	-0.14009		0.066	-13.3976	-1.10468	2.60651
0.0661	-12.7866	6.52832	5.04791		0.0661	-12.7866	3.16832	0.16511
0.0662	-33.8436	4.99832	0.16511		0.0662	-2.71661	-0.191683	6.87861
0.0663	-19.8056	-0.191683	5.65821		0.0663	-10.0406	-3.85068	16.0346
0.0664	-21.6366	0.118317	-0.14009		0.0664	-7.29361	-1.10468	-4.10739
0.0665	-24.0786	4.08832	1.08061		0.0665	-9.12461	-1.10468	-1.97119
0.0666	-19.1956	10.4883	-2.27629		0.0666	-4.85261	-0.191683	5.35301
0.0667	-25.6046	5.91832	2.30131		0.0667	-5.76761	-2.32468	-1.05559
0.0668	-25.2996	-0.491683	-5.93849		0.0668	-5.15761	-5.37668	-3.19186
0.0669	-28.3506	-0.191683	-3.80221		0.0669	-10.0406	4.38832	-0.14009
0.067	-24.3836	2.55832	-4.10739		0.067	-3.32661	4.69832	-0.44529
0.0671	-20.7216	1.63832	1.08061		0.0671	-14.3126	-1.10468	-3.49704
0.0672	-25.6046	4.99832	2.91161		0.0672	-12.4816	4.08832	-6.85399
0.0673	-15.2286	3.16832	-3.19186		0.0673	-1.19061	-6.59768	4.13231
0.0674	-21.9426	-2.93568	-1.05559		0.0674	-8.51462	3.16832	5.65821
0.0675	-24.9936	-0.799683	-0.75049		0.0675	-2.71661	1.63832	-6.24359
0.0676	-18.8906	4.69832	-0.75049		0.0676	-4.85261	-2.93568	0.47021
0.0677	-26.2146	0.118317	-0.75049		0.0677	-6.37861	2.55832	-1.05559
0.0678	-18.2796	1.02832	-2.27629		0.0678	-11.5666	-1.10468	-1.36079
0.0679	-22.2476	3.16832	-1.66599		0.0679	-7.29361	3.16832	0.47021
0.068	-25.2996	1.33832	2.91161		0.068	-5.76761	2.24832	4.13231
0.0681	-22.8576	-2.63068	-4.71774		0.0681	-2.10561	0.728317	-3.80221
0.0682	-26.5196	-1.40968	-2.88669		0.0682	-12.7866	0.728317	-3.49704
0.0683	-27.4356	4.38832	-0.44529		0.0683	-9.12461	-6.29268	-7.15919
0.0684	-26.8246	9.57832	-1.66599		0.0684	-17.3646	0.728317	3.21681
0.0685	-17.9746	-0.191683	1.69091		0.0685	-10.9556	-1.40968	-4.71774
0.0686	-22.5526	4.08832	-11.4316		0.0686	-14.9236	3.16832	-1.97119
0.0687	-23.4676	3.16832	-1.36079		0.0687	-20.4166	-4.76668	1.38581
0.0688	-26.8246	-3.54568	0.47021		0.0688	-15.2286	3.46832	-1.97119
0.0689	-29.8766	-4.15568	-5.93849		0.0689	-23.4676	0.728317	-2.27629
0.069	-24.6886	-3.54568	-4.41257		0.069	-24.9936	-3.54568	-0.75049
0.0691	-22.8576	0.118317	-18.7554		0.0691	-22.2476	-2.32468	4.43751
0.0692	-24.3836	10.4883	-41.3384		0.0692	-21.0266	-2.63068	1.38581
0.0693	-29.8766	4.38832	-37.9824		0.0693	-28.0456	1.94832	-1.66599
0.0694	-22.2476	0.418317	-111.837		0.0694	-32.6236	7.43832	8.40461
0.0695	-14.9236	3.16832	-287.007		0.0695	-28.0456	-4.15568	-0.14009
0.0696	-25.6046	4.69832	111.863		0.0696	-26.5196	-3.85068	6.57361
0.0697	-27.4356	3.46832	152.143		0.0697	-23.4676	0.118317	0.16511
0.0698	-20.1116	-3.24068	95.0746		0.0698	-26.8246	-2.32468	4.13231
0.0699	-20.7216	-1.71468	37.7016		0.0699	-32.9286	0.728317	0.16511
0.07	-24.9936	-1.10468	12.6776		0.07	-27.4356	-4.15568	2.91161
0.0701	-24.3836	-4.15568	-0.75049		0.0701	-31.4026	-4.76668	-1.97119
0.0702	-23.7736	-2.32468	-8.07469		0.0702	-25.9096	-2.93568	-3.49704
0.0703	-27.4356	-2.93568	-1.36079		0.0703	-23.4676	-1.40968	-1.05559
0.0704	-24.3836	-0.491683	-5.93849		0.0704	-24.6886	0.118317	-2.27629
0.0705	-22.8576	1.33832	2.30131		0.0705	-32.3186	-1.10468	2.30131
0.0706	-26.8246	-4.46168	-6.24359		0.0706	-24.3836	-9.95468	2.60651
0.0707	-23.7736	-2.32468	-4.71774		0.0707	-31.4026	0.418317	5.04791
0.0708	-33.8436	8.65832	-9.29539		0.0708	-28.3506	-2.63068	2.91161
0.0709	-25.9096	6.21832	-5.32809		0.0709	-30.4876	-1.71468	1.08061
0.071	-27.1306	-0.191683	-3.80221		0.071	-23.4676	-2.93568	-4.71774
0.0711	-43.9146	7.43832	-0.14009		0.0711	-27.7406	4.69832	-1.36079
0.0712	-36.2856	1.63832	-5.32809		0.0712	-20.4166	-3.24068	1.69091
0.0713	-44.2196	-3.54568	-5.02292		0.0713	-26.5196	-9.03868	-1.05559
0.0714	-38.1166	7.13832	-12.3471		0.0714	-29.5716	6.21832	-2.27629
0.0715	-50.0186	1.63832	0.77541		0.0715	-24.9936	4.69832	1.08061
0.0716	-57.3426	8.35832	0.47021		0.0716	-18.8906	-10.2597	-4.71774
0.0717	-47.5766	3.16832	-4.41257		0.0717	-19.1956	2.55832	-5.32809
0.0718	-52.1546	3.16832	0.77541		0.0718	-29.2666	1.63832	-5.02292
0.0719	-57.0376	1.02832	-4.10739		0.0719	-20.4166	-4.76668	-0.14009
0.072	-58.8686	1.02832	-3.49704		0.072	-19.5006	-5.68168	-1.05559
0.0721	-57.0376	2.24832	4.13231		0.0721	-29.5716	6.21832	-5.32809
0.0722	-59.7836	-0.491683	1.08061		0.0722	-29.2666	-4.76668	-2.58149
0.0723	-56.7326	3.46832	-1.66599		0.0723	-26.5196	-2.01968	-1.05559
0.0724	-57.9526	6.52832	2.30131		0.0724	-20.1116	-0.191683	-7.15919
0.0725	-56.4266	2.85832	-0.44529		0.0725	-28.3506	-1.10468	8.70961
0.0726	-48.4926	-13.0067	-0.44529		0.0726	-20.1116	-6.29268	0.77541
0.0727	-50.6286	0.118317	-4.71774		0.0727	-18.5856	4.38832	-5.32809
0.0728	-51.5446	4.69832	-0.14009		0.0728	-9.12461	-3.24068	0.16511
0.0729	-57.0376	7.43832	-1.05559		0.0729	-13.3976	1.94832	4.74271
0.073	-48.4926	3.16832	-4.10739		0.073	-20.1116	-3.85068	3.82721
0.0731	-55.2066	1.94832	-0.14009		0.0731	-14.3126	-4.46168	-1.66599
0.0732	-58.5636	-1.71468	0.77541		0.0732	-20.1116	-4.15568	-3.19186
0.0733	-46.3566	1.33832	-3.19186		0.0733	-24.9936	-2.01968	-0.44529
0.0734	-51.5446	5.30832	-1.66599		0.0734	-13.7026	0.728317	-8.07469
0.0735	-56.1216	-5.37668	-0.14009		0.0735	-14.9236	-11.1747	1.08061
0.0736	-52.7646	1.02832	-6.85399		0.0736	-12.4816	1.33832	1.38581
0.0737	-52.1546	11.4083	-0.44529		0.0737	-17.6696	2.24832	-1.66599
0.0738	-59.4786	10.1883	2.60651		0.0738	-5.46261	-9.03868	1.08061
0.0739	-46.3566	1.33832	-3.49704		0.0739	-20.1116	-4.46168	4.74271
0.074	-49.1026	3.46832	-1.97119		0.074	-8.81961	-6.29268	1.38581
0.0741	-32.0126	5.30832	-5.93849		0.0741	-10.0406	1.94832	2.60651
0.0742	-45.4406	3.77832	-0.14009		0.0742	-15.2286	-13.3117	8.09961
0.0743	-48.1876	5.91832	-3.19186		0.0743	-14.3126	-8.73368	0.16511
0.0744	-50.9336	-2.01968	-6.54879		0.0744	-7.29361	-2.32468	0.16511
0.0745	-38.7266	1.63832	-4.10739		0.0745	-10.0406	-2.93568	-3.49704
0.0746	-43.3046	5.60832	-3.49704		0.0746	-6.98861	-6.29268	-3.19186
0.0747	-34.4546	8.04832	-2.58149		0.0747	-17.6696	2.24832	11.4566
0.0748	-38.4216	6.52832	2.60651		0.0748	-1.49561	-0.191683	-4.71774
0.0749	-51.2386	6.82832	9.93061		0.0749	-17.3646	4.38832	0.77541
0.075	-47.5766	5.91832	-4.71774		0.075	0.0303852	2.24832	-0.44529
0.0751	-52.1546	14.4583	1.08061		0.0751	-10.6506	0.728317	6.26861
0.0752	-42.6946	10.7983	-2.88669		0.0752	-12.7866	9.26832	0.16511
0.0753	-46.3566	7.43832	3.82721		0.0753	-5.15761	-1.10468	2.91161
0.0754	-53.0706	13.2383	1.99611		0.0754	-3.63161	4.38832	2.60651
0.0755	-39.6426	11.7083	-2.27629		0.0755	-8.81961	3.77832	-1.36079
0.0756	-47.8826	15.0683	-2.27629		0.0756	-6.68361	-4.46168	3.82721
0.0757	-32.6236	19.3383	-13.873		0.0757	-6.37861	-0.799683	3.21681
0.0758	-44.2196	19.0383	-51.7144		0.0758	-12.4816	-3.85068	2.91161
0.0759	-39.0316	26.6683	-158.217		0.0759	-7.59861	-7.20768	-5.02292
0.076	-42.9996	26.9683	-213.457		0.076	-5.46261	9.26832	-5.32809
0.0761	-39.6426	27.5783	156.113		0.0761	-4.24161	-4.46168	9.93061
0.0762	-40.8626	22.6983	162.823		0.0762	-10.9556	1.94832	5.35301
0.0763	-46.0506	30.0283	104.533		0.0763	-6.98861	-1.40968	0.77541
0.0764	-50.3236	32.1583	41.3636		0.0764	-9.73561	8.65832	-5.02292
0.0765	-42.3886	28.1883	13.2876		0.0765	-3.63161	4.69832	1.38581
0.0766	-45.7456	24.5283	0.77541		0.0766	-6.37861	2.24832	1.69091
0.0767	-47.2716	29.7183	-5.63329		0.0767	-3.32661	2.85832	1.08061
0.0768	-52.4596	28.1883	-5.02292		0.0768	-10.9556	-4.46168	0.16511
0.0769	-47.2716	34.5983	1.08061		0.0769	7.65939	-3.24068	2.30131
0.077	-47.8826	34.5983	-4.41257		0.077	4.30339	1.33832	1.69091
0.0771	-48.4926	35.5183	-3.19186		0.0771	-5.15761	-2.01968	3.52201
0.0772	-47.5766	29.4083	-7.15919		0.0772	-3.32661	-0.491683	6.26861
0.0773	-41.7786	32.1583	0.77541		0.0773	-9.12461	5.60832	1.99611
0.0774	-40.5576	27.5783	-1.66599		0.0774	-7.29361	0.418317	2.30131
0.0775	-49.1026	22.3983	-2.88669		0.0775	-12.1766	4.99832	-0.44529
0.0776	-48.4926	26.0583	1.99611		0.0776	-5.15761	7.43832	-5.02292
0.0777	-53.9856	33.0783	-1.36079		0.0777	-12.7866	0.118317	5.35301
0.0778	-49.1026	32.1583	-6.24359		0.0778	-4.54761	1.63832	7.79461
0.0779	-49.1026	30.3283	3.52201		0.0779	-10.0406	-8.12368	0.47021
0.078	-47.2716	23.3083	-0.75049		0.078	-5.15761	-6.59768	0.16511
0.0781	-50.9336	30.0283	0.47021		0.0781	-8.51462	-2.93568	6.57361
0.0782	-52.1546	33.6883	-2.88669		0.0782	-8.81961	-2.93568	-0.44529
0.0783	-51.8496	21.7883	-1.66599		0.0783	-8.20961	6.52832	-1.05559
0.0784	-49.4076	29.7183	-8.68499		0.0784	-7.29361	-7.81868	5.04791
0.0785	-44.8306	23.9183	-0.75049		0.0785	-7.29361	-0.491683	0.47021
0.0786	-55.5116	33.0783	7.18461		0.0786	0.0303852	-6.59768	-3.80221
0.0787	-46.6616	23.6183	-0.75049		0.0787	-1.19061	1.02832	5.65821
0.0788	-53.0706	27.2783	-3.19186		0.0788	-5.76761	-3.54568	-0.14009
0.0789	-49.4076	30.0283	4.43751		0.0789	-5.46261	-3.85068	-2.27629
0.079	-54.5956	23.9183	-2.27629		0.079	-5.15761	-3.24068	-3.49704
0.0791	-54.2906	25.1383	-2.27629		0.0791	-7.59861	-5.98768	5.35301
0.0792	-55.5116	20.5583	-5.02292		0.0792	-4.54761	6.82832	9.93061
0.0793	-53.3756	25.4483	5.65821		0.0793	-4.24161	-1.71468	3.52201
0.0794	-54.9016	23.9183	-5.93849		0.0794	-6.98861	0.728317	3.82721
0.0795	-65.2776	29.1083	0.16511		0.0795	1.55639	1.63832	-1.36079
0.0796	-57.9526	30.0283	-2.88669		0.0796	-7.59861	-4.46168	-0.75049
0.0797	-56.1216	32.4683	4.43751		0.0797	-11.8716	5.60832	0.77541
0.0798	-57.9526	25.1383	-10.8213		0.0798	-3.93661	4.08832	3.21681
0.0799	-71.3816	32.7683	4.13231		0.0799	-5.15761	-5.07168	-3.80221
0.08	-64.0566	23.6183	-12.9575		0.08	-9.12461	-4.46168	3.52201
0.0801	-62.2256	33.0783	-3.80221		0.0801	-10.3456	1.94832	4.13231
0.0802	-62.8356	26.9683	-5.93849		0.0802	-1.80061	-6.29268	12.6776
0.0803	-64.3616	20.2583	-23.6384		0.0803	-9.12461	-6.59768	4.43751
0.0804	-58.5636	22.3983	-47.4424		0.0804	-8.81961	-1.40968	5.96361
0.0805	-63.4456	26.9683	-40.4234		0.0805	-10.0406	1.63832	-1.36079
0.0806	-61.9206	20.5583	-229.627		0.0806	-7.90461	-8.42868	4.43751
0.0807	-65.5826	22.6983	-96.2704		0.0807	-3.02161	0.418317	2.91161
0.0808	-62.8356	30.0283	168.313		0.0808	1.86139	-1.40968	-1.66599
0.0809	-64.0566	28.1883	149.703		0.0809	0.946385	-0.799683	-6.54879
0.081	-56.1216	18.4283	79.2056		0.081	-8.51462	-0.799683	-3.80221
0.0811	-67.7186	32.1583	27.6306		0.0811	-6.37861	-0.191683	-2.88669
0.0812	-57.6476	22.0883	8.70961		0.0812	-7.29361	-2.01968	0.16511
0.0813	-57.3426	26.6683	-2.88669		0.0813	-6.37861	-2.93568	-2.27629
0.0814	-64.9716	29.1083	-7.15919		0.0814	-0.274615	1.02832	-5.63329
0.0815	-67.4136	19.0383	-5.93849		0.0815	-9.12461	-5.68168	1.08061
0.0816	-63.7516	21.7883	-4.71774		0.0816	-9.73561	-7.20768	8.70961
0.0817	-66.4976	21.4783	-0.44529		0.0817	-5.76761	-5.37668	-0.44529
0.0818	-66.1926	20.5583	-5.32809		0.0818	-5.46261	-8.12368	-1.97119
0.0819	-66.1926	19.3383	-3.80221		0.0819	-4.54761	-2.93568	-1.66599
0.082	-70.4616	20.5583	-2.58149		0.082	-8.20961	-3.85068	-6.54879
0.0821	-72.2916	18.1183	0.47021		0.0821	-6.68361	-1.71468	-3.80221
0.0822	-75.3516	19.9483	-1.97119		0.0822	-6.07261	0.118317	0.77541
0.0823	-73.5216	24.2283	-2.27629		0.0823	-10.3456	3.46832	-3.19186
0.0824	-77.1816	19.3383	-5.93849		0.0824	-10.0406	1.33832	-1.97119
0.0825	-75.3516	23.3083	-5.32809		0.0825	-8.20961	1.02832	1.08061
0.0826	-85.4216	29.1083	3.21681		0.0826	-5.46261	-5.37668	0.47021
0.0827	-84.2016	13.8483	-3.80221		0.0827	-5.46261	-15.4477	-5.63329
0.0828	-77.1816	20.8683	-1.97119		0.0828	-9.12461	-2.63068	1.08061
0.0829	-84.5016	16.8983	0.47021		0.0829	-6.98861	-8.42868	-2.27629
0.083	-90.9116	23.0083	3.82721		0.083	-6.68361	-9.34368	2.91161
0.0831	-86.0316	13.8483	-5.02292		0.0831	1.55639	-8.73368	10.5406
0.0832	-86.9416	15.9883	-8.07469		0.0832	1.25139	-8.73368	-9.90569
0.0833	-92.7416	15.9883	1.38581		0.0833	1.25139	-2.32468	-1.66599
0.0834	-85.1116	19.3383	-1.36079		0.0834	-7.90461	3.16832	-2.27629
0.0835	-87.8616	12.0183	-2.88669		0.0835	-8.51462	-4.46168	5.96361
0.0836	-97.9316	15.6783	-3.80221		0.0836	-14.6176	-6.29268	2.60651
0.0837	-83.5916	14.4583	1.99611		0.0837	-9.12461	-1.40968	1.08061
0.0838	-87.5516	10.1883	-1.36079		0.0838	-15.8386	-2.32468	-3.80221
0.0839	-82.6716	14.4583	-1.97119		0.0839	-6.68361	-2.93568	-4.10739
0.084	-89.0816	17.5083	-5.63329		0.084	-4.54761	-6.29268	2.30131
0.0841	-89.0816	14.4583	-12.042		0.0841	-5.46261	-2.01968	0.77541
0.0842	-95.4916	20.5583	-34.0144		0.0842	-11.8716	-5.07168	-2.27629
0.0843	-87.2516	22.6983	-31.2684		0.0843	-5.76761	-2.32468	-4.10739
0.0844	-87.2516	21.7883	-23.6384		0.0844	-3.32661	5.91832	-0.44529
0.0845	-88.7716	15.6783	-155.477		0.0845	-2.71661	-12.0907	1.38581
0.0846	-80.5316	19.0383	-175.617		0.0846	-6.07261	-3.24068	-3.19186
0.0847	-90.9116	13.2383	154.583		0.0847	-4.24161	-3.54568	-6.54879
0.0848	-88.1616	19.6483	172.283		0.0848	-8.51462	1.02832	7.79461
0.0849	-74.1316	17.5083	107.893		0.0849	5.21839	-0.799683	-11.7368
0.085	-84.2016	13.2383	31.2926		0.085	-8.51462	-4.15568	-4.10739
0.0851	-85.7216	12.3283	1.38581		0.0851	-11.2606	-0.491683	1.38581
0.0852	-82.0616	7.13832	1.69091		0.0852	-9.12461	-0.491683	-2.58149
0.0853	-83.5916	28.7983	-11.7368		0.0853	-3.63161	-8.73368	0.47021
0.0854	-76.5716	17.8183	-10.2109		0.0854	-1.49561	-2.32468	8.40461
0.0855	-73.2116	16.8983	-1.97119		0.0855	-7.29361	-8.42868	3.21681
0.0856	-82.6716	12.6283	-1.05559		0.0856	-10.0406	-6.29268	-3.49704
0.0857	-75.6516	11.7083	-4.71774		0.0857	-2.41061	-4.15568	-1.05559
0.0858	-73.8216	19.0383	-0.14009		0.0858	-11.2606	-3.85068	2.60651
0.0859	-76.8716	13.8483	-5.02292		0.0859	-3.32661	7.43832	8.40461
0.086	-79.3116	15.6783	-0.44529		0.086	1.25139	-7.20768	-8.68499
0.0861	-75.0416	18.1183	-1.66599		0.0861	-4.85261	8.65832	4.13231
0.0862	-85.4216	12.0183	2.60651		0.0862	-2.71661	-3.24068	0.47021
0.0863	-84.2016	10.7983	0.77541		0.0863	-2.71661	-5.07168	2.30131
0.0864	-84.5016	8.04832	-3.80221		0.0864	-2.10561	-8.12368	1.69091
0.0865	-77.7916	15.6783	-0.75049		0.0865	-0.579615	-7.81868	1.69091
0.0866	-82.6716	7.43832	-1.05559		0.0866	-10.3456	-2.63068	-1.97119
0.0867	-77.4816	10.7983	-1.36079		0.0867	-7.90461	1.02832	3.82721
0.0868	-80.5316	18.4283	-2.27629		0.0868	-8.81961	0.118317	-4.10739
0.0869	-77.4816	16.8983	0.16511		0.0869	-7.59861	-0.799683	2.30131
0.087	-80.8416	19.9483	4.13231		0.087	-5.46261	-13.0067	3.82721
0.0871	-74.1316	18.1183	-2.27629		0.0871	-3.63161	-2.63068	5.96361
0.0872	-76.2616	14.1583	1.08061		0.0872	-1.80061	2.24832	2.60651
0.0873	-79.0116	28.4983	4.13231		0.0873	-14.9236	2.85832	-0.75049
0.0874	-71.0716	16.2883	-4.71774		0.0874	-10.3456	1.33832	1.69091
0.0875	-75.0416	22.0883	0.77541		0.0875	-7.90461	-1.71468	7.18461
0.0876	-81.4516	26.6683	5.65821		0.0876	-9.42962	-4.15568	1.69091
0.0877	-89.9916	12.0183	5.04791		0.0877	-5.46261	-2.63068	14.8136
0.0878	-78.4016	22.0883	-8.37989		0.0878	-8.20961	-5.98768	-2.88669
0.0879	-81.7616	21.4783	-1.66599		0.0879	-11.8716	7.74832	1.38581
0.088	-86.3316	26.3583	-3.80221		0.088	-4.24161	13.8483	-0.14009
0.0881	-84.5016	18.4283	-2.88669		0.0881	-4.85261	14.7683	-4.10739
0.0882	-75.0416	17.8183	-8.68499		0.0882	-5.46261	21.4783	9.32061
0.0883	-81.7616	26.9683	5.35301		0.0883	-0.884615	16.5983	0.77541
0.0884	-84.5016	19.3383	-7.46429		0.0884	-4.85261	20.5583	-3.19186
0.0885	-78.0916	24.8383	0.77541		0.0885	2.47139	25.7483	0.16511
0.0886	-82.6716	23.3083	-14.4834		0.0886	-9.12461	15.9883	3.21681
0.0887	-84.5016	21.1783	-32.7944		0.0887	-6.07261	23.3083	-3.19186
0.0888	-87.2516	17.5083	-35.2354		0.0888	-5.46261	27.8883	-1.97119
0.0889	-85.7216	19.0383	-86.1994		0.0889	-8.20961	28.4983	0.47021
0.089	-71.0716	15.9883	-331.557		0.089	-2.10561	26.3583	-2.88669
0.0891	-82.9816	20.5583	75.5436		0.0891	-3.93661	31.8583	-4.41257
0.0892	-90.3016	18.7283	185.103		0.0892	-1.80061	25.4483	1.08061
0.0893	-89.3816	27.2783	135.363		0.0893	-2.71661	38.5683	6.57361
0.0894	-94.5716	14.7683	55.4016		0.0894	-6.37861	45.2783	-1.97119
0.0895	-93.0516	25.7483	14.8136		0.0895	-5.46261	42.5383	0.77541
0.0896	-90.9116	18.1183	3.21681		0.0896	-1.80061	44.9783	-0.14009
0.0897	-92.1316	19.9483	-2.58149		0.0897	-3.63161	47.7283	2.91161
0.0898	-98.8416	14.4583	-2.88669		0.0898	-5.15761	64.8183	9.62561
0.0899	-97.3216	20.5583	1.99611		0.0899	3.99739	52.9083	4.74271
0.09	-102.202	21.4783	-0.44529		0.09	-12.1766	51.3883	1.69091
0.0901	-105.862	13.5483	-5.63329		0.0901	3.08239	57.7983	-2.88669
0.0902	-99.1516	20.5583	-4.41257		0.0902	-7.29361	52.9083	-2.27629
0.0903	-107.082	14.7683	-0.14009		0.0903	-3.02161	61.4583	3.52201
0.0904	-110.442	10.7983	3.21681		0.0904	-8.20961	58.4083	-3.49704
0.0905	-110.142	20.8683	-5.02292		0.0905	-3.32661	63.5883	1.99611
0.0906	-104.032	23.9183	-3.19186		0.0906	-2.41061	53.2183	-0.75049
0.0907	-108.612	25.4483	-1.97119		0.0907	-6.37861	56.5783	-8.99019
0.0908	-107.392	15.6783	-6.24359		0.0908	-8.20961	52.9083	-4.10739
0.0909	-108.002	16.5983	-5.32809		0.0909	-6.37861	54.7383	1.99611
0.091	-102.202	5.30832	-4.10739		0.091	4.91339	50.1683	-1.66599
0.0911	-106.472	22.6983	-5.93849		0.0911	6.13439	56.8783	-1.66599
0.0912	-97.3216	19.9483	-1.05559		0.0912	-6.37861	55.6583	-0.44529
0.0913	-106.782	14.7683	-5.63329		0.0913	-8.51462	53.8283	-5.93849
0.0914	-110.442	13.5483	-8.68499		0.0914	-11.2606	55.0483	-2.88669
0.0915	-113.802	13.8483	-6.54879		0.0915	-6.68361	55.9683	5.35301
0.0916	-97.9316	15.6783	-5.93849		0.0916	-3.93661	48.6383	-5.02292
0.0917	-113.192	18.4283	-1.66599		0.0917	-3.93661	59.3183	-4.71774
0.0918	-106.782	22.0883	3.21681		0.0918	-1.19061	55.0483	-0.14009
0.0919	-107.082	19.9483	1.99611		0.0919	1.55639	54.7383	-0.14009
0.092	-110.442	21.7883	-1.97119		0.092	-7.90461	58.4083	7.48961
0.0921	-103.732	25.4483	-5.93849		0.0921	-6.98861	51.0783	1.38581
0.0922	-111.662	19.6483	-14.7884		0.0922	1.25139	55.0483	-2.27629
0.0923	-102.512	23.9183	-26.9954		0.0923	4.60839	54.4383	0.16511
0.0924	-108.612	26.3583	-34.9304		0.0924	-12.1766	52.2983	4.74271
0.0925	-106.172	26.0583	-43.4754		0.0925	-5.76761	46.4983	1.99611
0.0926	-104.342	20.2583	-260.757		0.0926	1.55639	43.7583	-1.05559
0.0927	-106.782	23.0083	-73.6874		0.0927	-1.80061	54.1283	0.77541
0.0928	-105.562	24.8383	177.473		0.0928	1.25139	50.7783	-0.14009
0.0929	-102.202	19.9483	149.393		0.0929	-12.4816	48.6383	-0.14009
0.093	-111.052	27.2783	85.0036		0.093	-4.85261	58.7083	1.08061
0.0931	-105.862	29.1083	29.7676		0.0931	-6.37861	43.1483	4.13231
0.0932	-105.252	24.8383	5.96361		0.0932	-7.59861	51.3883	-1.05559
0.0933	-109.532	18.7283	1.08061		0.0933	-12.1766	57.1883	2.91161
0.0934	-104.032	27.8883	-0.14009		0.0934	-2.41061	40.0983	3.82721
0.0935	-108.612	29.1083	-2.58149		0.0935	-7.29361	44.6683	-3.80221
0.0936	-111.972	26.0583	7.48961		0.0936	-6.98861	50.4683	1.69091
0.0937	-102.812	25.7483	-4.10739		0.0937	-4.54761	42.2283	5.04791
0.0938	-89.3816	27.2783	-0.44529		0.0938	-14.9236	45.8883	-0.75049
0.0939	-101.592	32.1583	-5.63329		0.0939	-2.71661	49.8583	-5.02292
0.094	-104.642	21.4783	-2.58149		0.094	1.55639	46.4983	-3.19186
0.0941	-104.342	32.4683	0.47021		0.0941	-4.85261	43.7583	6.26861
0.0942	-110.752	26.6683	-3.80221		0.0942	-4.54761	50.4683	7.18461
0.0943	-110.752	23.6183	-1.97119		0.0943	-0.274615	44.0583	16.6446
0.0944	-108.312	29.1083	6.57361		0.0944	-7.29361	44.9783	-1.05559
0.0945	-117.162	29.7183	0.16511		0.0945	-3.63161	40.3983	0.77541
0.0946	-116.552	30.0283	1.08061		0.0946	-6.98861	44.6683	-1.36079
0.0947	-115.632	29.4083	-4.71774		0.0947	-9.73561	37.9583	3.21681
0.0948	-114.102	30.0283	-2.58149		0.0948	-10.0406	36.7383	7.18461
0.0949	-112.272	30.6383	1.38581		0.0949	-1.19061	38.8783	-1.97119
0.095	-114.412	28.1883	2.30131		0.095	-10.3456	42.5383	4.74271
0.0951	-115.932	38.5683	1.38581		0.0951	-1.19061	39.4883	-1.05559
0.0952	-114.412	30.3283	-4.10739		0.0952	-3.93661	42.8383	-5.32809
0.0953	-116.852	26.0583	8.40461		0.0953	-4.85261	38.8783	5.35301
0.0954	-120.822	26.6683	-5.32809		0.0954	-3.63161	35.2083	2.60651
0.0955	-115.932	33.3783	5.96361		0.0955	-4.24161	38.2583	2.30131
0.0956	-116.552	19.0383	1.69091		0.0956	0.335385	39.4883	0.77541
0.0957	-113.492	27.5783	-1.66599		0.0957	-6.98861	32.7683	1.38581
0.0958	-124.172	25.4483	1.69091		0.0958	-3.63161	42.5383	4.43751
0.0959	-127.842	27.2783	0.77541		0.0959	-1.80061	34.9083	2.60651
0.096	-121.432	25.7483	0.77541		0.096	-4.54761	46.1983	-4.10739
0.0961	-130.892	27.2783	-1.05559		0.0961	0.335385	40.0983	8.09961
0.0962	-140.352	26.0583	2.30131		0.0962	-5.76761	53.5183	-0.75049
0.0963	-134.862	25.7483	-13.5678		0.0963	-3.02161	50.4683	-3.49704
0.0964	-130.892	33.6883	-25.4694		0.0964	-2.41061	55.0483	-5.32809
0.0965	-134.252	23.6183	-119.467		0.0965	-9.73561	59.3183	-2.27629
0.0966	-132.722	32.7683	-325.147		0.0966	-8.51462	56.5783	1.38581
0.0967	-135.162	26.9683	33.1236		0.0967	-11.5666	58.7083	-1.97119
0.0968	-136.692	23.0083	151.833		0.0968	-14.3126	58.0983	1.69091
0.0969	-139.432	21.4783	131.693		0.0969	-8.20961	61.4583	5.96361
0.097	-141.872	24.5283	68.2196		0.097	-16.1436	53.2183	4.13231
0.0971	-135.772	20.5583	30.9876		0.0971	-5.46261	60.5383	3.52201
0.0972	-145.232	28.7983	12.3716		0.0972	-5.76761	57.1883	8.40461
0.0973	-133.942	27.2783	6.87861		0.0973	-7.90461	51.0783	1.99611
0.0974	-135.772	28.1883	-1.36079		0.0974	-3.93661	50.7783	8.40461
0.0975	-132.412	26.6683	-1.05559		0.0975	-3.32661	62.0683	3.82721
0.0976	-134.862	36.1283	-3.80221		0.0976	1.25139	62.9783	2.60651
0.0977	-138.522	28.7983	-6.85399		0.0977	-1.19061	54.7383	1.99611
0.0978	-142.182	25.1383	1.08061		0.0978	-7.59861	65.7283	11.4566
0.0979	-135.772	30.6383	-1.66599		0.0979	-7.29361	55.0483	8.70961
0.098	-133.632	30.6383	-2.88669		0.098	-4.54761	65.1183	-0.14009
0.0981	-136.692	35.8183	3.52201		0.0981	3.08239	66.3383	3.52201
0.0982	-138.822	36.7383	-1.66599		0.0982	-10.6506	75.1883	6.26861
0.0983	-142.492	32.7683	-0.44529		0.0983	-13.3976	73.6683	-1.05559
0.0984	-139.132	28.7983	-6.24359		0.0984	0.335385	74.2783	-0.75049
0.0985	-147.672	32.1583	-4.41257		0.0985	-4.54761	93.1983	0.16511
0.0986	-139.132	33.3783	-6.24359		0.0986	-12.7866	90.4483	3.82721
0.0987	-149.812	31.2483	-1.36079		0.0987	-4.24161	98.6883	6.26861
0.0988	-136.692	37.3483	-2.27629		0.0988	-8.20961	102.658	1.69091
0.0989	-135.772	30.3283	-12.3471		0.0989	-12.7866	102.958	-0.44529
0.099	-130.282	31.8583	6.26861		0.099	-9.73561	110.898	6.26861
0.0991	-129.362	38.2583	6.26861		0.0991	-7.90461	116.388	2.91161
0.0992	-123.872	34.2983	-1.66599		0.0992	-2.10561	107.538	-3.80221
0.0993	-119.292	32.1583	1.38581		0.0993	-12.7866	122.188	-1.66599
0.0994	-122.652	36.4283	-1.66599		0.0994	-12.7866	127.678	2.30131
0.0995	-121.432	37.3483	4.13231		0.0995	-10.0406	127.678	-3.49704
0.0996	-118.072	40.7083	-4.10739		0.0996	-0.274615	130.118	-5.63329
0.0997	-120.512	40.3983	-1.97119		0.0997	-9.12461	131.338	-9.29539
0.0998	-117.772	33.0783	-2.88669		0.0998	-20.7216	131.038	5.35301
0.0999	-115.322	40.3983	-17.5354		0.0999	-6.68361	131.038	-3.19186
0.1	-120.512	36.7383	-8.99019		0.1	0.640385	140.188	2.60651
0.1001	-128.452	38.8783	-8.68499		0.1001	-16.1436	147.818	-1.97119
0.1002	-125.092	42.2283	-14.4834		0.1002	-13.3976	151.488	1.99611
0.1003	-128.452	39.1783	-26.6904		0.1003	-12.4816	156.058	2.30131
0.1004	-124.782	39.1783	-168.897		0.1004	-17.0596	152.708	5.04791
0.1005	-123.262	31.5483	-214.677		0.1005	-15.5336	152.398	1.38581
0.1006	-127.532	32.1583	88.9716		0.1006	-10.6506	159.108	-2.88669
0.1007	-137.602	28.4983	157.633		0.1007	-13.7026	151.788	-2.27629
0.1008	-133.332	30.0283	118.883		0.1008	-21.9426	155.448	-1.36079
0.1009	-135.772	36.1283	50.2136		0.1009	-16.4486	154.538	0.77541
0.101	-126.622	30.9383	16.0346		0.101	-19.8056	158.498	2.60651
0.1011	-140.042	28.7983	5.35301		0.1011	-27.1306	155.758	-0.14009
0.1012	-129.362	35.5183	-0.44529		0.1012	-21.6366	157.588	-3.19186
0.1013	-139.432	31.2483	-3.19186		0.1013	-17.0596	155.148	-0.44529
0.1014	-131.502	24.8383	-1.05559		0.1014	-25.9096	153.318	-1.66599
0.1015	-124.482	30.3283	-4.41257		0.1015	-20.1116	156.368	-8.37989
0.1016	-135.162	31.8583	-4.41257		0.1016	-32.0126	160.948	-1.66599
0.1017	-133.332	34.2983	0.47021		0.1017	-34.7596	156.668	1.99611
0.1018	-135.472	28.1883	-4.71774		0.1018	-35.6746	151.488	-4.71774
0.1019	-138.522	30.6383	8.09961		0.1019	-27.4356	155.148	-5.93849
0.102	-136.382	32.1583	2.30131		0.102	-42.3886	150.568	0.77541
0.1021	-140.042	30.6383	-4.10739		0.1021	-28.9616	149.648	-3.19186
0.1022	-133.632	31.5483	-5.63329		0.1022	-31.4026	146.908	-4.10739
0.1023	-140.962	29.4083	-5.32809		0.1023	-32.0126	138.358	-5.93849
0.1024	-142.792	19.0383	-3.80221		0.1024	-34.7596	151.788	-2.58149
0.1025	-146.152	28.4983	-3.80221		0.1025	-31.7076	146.908	0.47021
0.1026	-138.212	30.0283	-1.97119		0.1026	-28.9616	154.228	3.82721
0.1027	-136.992	26.6683	-0.44529		0.1027	-24.3836	157.278	-2.58149
0.1028	-135.772	27.8883	-4.10739		0.1028	-36.5906	153.928	-1.36079
0.1029	-143.102	26.0583	-5.63329		0.1029	-25.2996	161.858	3.52201
0.103	-137.602	26.0583	-2.58149		0.103	-38.7266	163.688	4.74271
0.1031	-140.042	24.2283	-4.71774		0.1031	-37.8116	160.028	-0.14009
0.1032	-128.752	26.9683	1.08061		0.1032	-28.9616	167.048	-0.75049
0.1033	-148.282	31.2483	4.43751		0.1033	-34.7596	161.858	-4.10739
0.1034	-144.622	34.2983	-6.24359		0.1034	-34.1496	157.278	-1.97119
0.1035	-136.082	41.3183	-1.97119		0.1035	-35.6746	156.368	-5.32809
0.1036	-139.742	49.2483	5.96361		0.1036	-30.4876	152.708	3.52201
0.1037	-143.102	46.8083	-8.37989		0.1037	-32.6236	152.398	-0.75049
0.1038	-138.522	50.4683	-0.44529		0.1038	-33.8436	160.028	-3.49704
0.1039	-147.062	59.6283	-1.97119		0.1039	-28.6556	158.198	1.38581
0.104	-150.112	68.4783	-6.54879		0.104	-28.9616	162.168	1.99611
0.1041	-152.562	69.6983	-0.75049		0.1041	-33.8436	158.498	-6.24359
0.1042	-149.202	61.1483	-4.41257		0.1042	-30.1816	165.828	5.65821
0.1043	-159.572	75.1883	-4.10739		0.1043	-36.5906	159.418	4.13231
0.1044	-159.272	68.1683	-3.49704		0.1044	-32.6236	166.738	4.43751
0.1045	-165.372	79.7683	-2.88669		0.1045	-37.5066	167.048	-0.14009
0.1046	-152.862	78.5483	-17.8404		0.1046	-37.8116	162.778	7.48961
0.1047	-162.022	85.5683	-35.5404		0.1047	-31.4026	167.048	-3.49704
0.1048	-160.192	85.5683	-166.457		0.1048	-28.3506	163.078	-2.27629
0.1049	-167.202	82.5183	-192.707		0.1049	-35.0646	174.368	-0.44529
0.105	-164.762	90.4483	127.123		0.105	-32.9286	169.188	5.96361
0.1051	-163.542	86.4783	155.803		0.1051	-31.7076	173.458	1.38581
0.1052	-163.852	76.7183	106.673		0.1052	-38.7266	170.408	-1.97119
0.1053	-163.852	81.2883	42.2796		0.1053	-45.7456	174.068	3.21681
0.1054	-162.932	84.9583	14.5086		0.1054	-34.7596	168.878	0.16511
0.1055	-170.562	79.7683	9.32061		0.1055	-39.3376	154.538	-0.44529
0.1056	-167.202	85.5683	-2.88669		0.1056	-42.3886	160.638	-0.75049
0.1057	-162.022	86.7883	0.16511		0.1057	-45.7456	169.798	-8.37989
0.1058	-162.322	81.2883	1.08061		0.1058	-41.1686	157.888	0.77541
0.1059	-165.682	88.9183	1.08061		0.1059	-45.1356	155.448	-1.97119
0.106	-172.392	84.3483	-7.46429		0.106	-40.2526	169.488	12.6776
0.1061	-174.832	78.8483	-0.14009		0.1061	-39.9476	160.028	-2.88669
0.1062	-169.952	77.9383	-1.36079		0.1062	-36.8956	156.368	-4.10739
0.1063	-169.042	82.5183	-6.54879		0.1063	-34.7596	156.058	-0.14009
0.1064	-167.512	82.5183	0.77541		0.1064	-35.9806	156.368	1.38581
0.1065	-169.042	83.4283	-2.27629		0.1065	-38.4216	156.668	-1.36079
0.1066	-170.562	88.0083	0.77541		0.1066	-39.3376	163.078	1.08061
0.1067	-177.582	87.6983	2.30131		0.1067	-39.0316	160.638	4.13231
0.1068	-188.872	85.5683	-3.19186		0.1068	-31.0976	159.418	1.99611
0.1069	-184.602	89.2283	6.57361		0.1069	-33.5386	161.558	4.13231
0.107	-177.582	93.1983	-3.80221		0.107	-38.1166	163.078	1.99611
0.1071	-175.142	85.5683	5.96361		0.1071	-29.8766	161.558	6.26861
0.1072	-179.112	82.2083	-6.54879		0.1072	-36.2856	156.368	-0.14009
0.1073	-167.812	83.1283	-1.05559		0.1073	-32.0126	162.168	0.47021
0.1074	-172.392	83.4283	-1.05559		0.1074	-26.8246	165.218	-3.19186
0.1075	-173.922	83.1283	1.08061		0.1075	-27.1306	157.888	5.96361
0.1076	-179.722	82.5183	1.08061		0.1076	-27.1306	164.608	1.99611
0.1077	-186.132	89.5283	2.60651		0.1077	-22.8576	155.148	1.08061
0.1078	-187.962	86.1783	-4.10739		0.1078	-35.0646	148.738	10.2356
0.1079	-195.282	88.6183	-3.49704		0.1079	-38.4216	155.148	0.16511
0.108	-201.082	85.5683	-2.27629		0.108	-24.6886	151.788	-1.05559
0.1081	-191.312	81.9083	2.30131		0.1081	-29.8766	148.128	-3.80221
0.1082	-198.032	82.8183	-4.71774		0.1082	-40.5576	151.788	4.43751
0.1083	-189.182	75.7983	-0.44529		0.1083	-32.9286	154.228	0.16511
0.1084	-186.742	75.1883	3.21681		0.1084	-29.8766	149.958	4.13231
0.1085	-188.572	79.7683	-0.44529		0.1085	-32.9286	154.228	2.30131
0.1086	-186.432	82.2083	-4.10739		0.1086	-36.8956	162.778	6.87861
0.1087	-186.742	83.4283	-1.36079		0.1087	-32.6236	154.228	4.43751
0.1088	-191.622	77.3283	-4.10739		0.1088	-42.0836	154.838	3.52201
0.1089	-181.552	86.7883	-1.05559		0.1089	-49.1026	153.008	1.69091
0.109	-191.312	83.4283	-3.19186		0.109	-46.0506	152.708	4.13231
0.1091	-201.992	77.6283	-1.05559		0.1091	-45.1356	149.958	0.77541
0.1092	-197.112	78.5483	3.82721		0.1092	-49.4076	159.108	-0.75049
0.1093	-187.962	79.7683	1.38581		0.1093	-38.4216	155.148	-0.14009
0.1094	-192.842	71.8283	-1.66599		0.1094	-36.8956	151.488	5.96361
0.1095	-182.772	77.3283	-3.19186		0.1095	-50.3236	153.008	-2.88669
0.1096	-188.872	70.6083	-2.88669		0.1096	-42.9996	158.808	4.74271
0.1097	-190.702	73.9683	-6.24359		0.1097	-46.0506	159.718	2.91161
0.1098	-177.282	75.1883	-7.46429		0.1098	-51.8496	154.838	5.04791
0.1099	-190.702	68.4783	3.52201		0.1099	-50.9336	170.098	2.60651
0.11	-178.802	71.5283	0.47021		0.11	-46.9666	166.738	3.82721
0.1101	-178.502	81.9083	-8.37989		0.1101	-37.2006	165.518	-3.49704
0.1102	-193.752	73.3583	-23.0284		0.1102	-44.5256	167.958	1.99611
0.1103	-185.212	63.5883	-153.947		0.1103	-50.3236	168.268	3.21681
0.1104	-192.532	68.1683	-178.667		0.1104	-44.5256	171.928	-4.71774
0.1105	-172.092	69.6983	127.123		0.1105	-51.8496	177.428	5.65821
0.1106	-176.662	78.8483	163.743		0.1106	-39.3376	167.658	-9.60059
0.1107	-180.022	71.5283	123.763		0.1107	-43.3046	170.408	-2.88669
0.1108	-179.722	70.9183	42.5846		0.1108	-41.1686	170.708	0.16511
0.1109	-185.212	73.3583	13.5926		0.1109	-34.7596	171.628	-1.05559
0.111	-183.682	69.6983	6.26861		0.111	-38.1166	159.718	3.82721
0.1111	-180.632	75.1883	1.38581		0.1111	-32.3186	168.268	-4.41257
0.1112	-182.772	75.7983	-0.75049		0.1112	-26.2146	171.318	1.38581
0.1113	-187.962	71.8283	-7.76949		0.1113	-35.3696	166.438	1.69091
0.1114	-188.572	80.9883	-4.10739		0.1114	-43.9146	163.078	7.79461
0.1115	-190.702	80.9883	-9.60059		0.1115	-27.4356	172.538	2.30131
0.1116	-185.512	74.5783	-4.71774		0.1116	-30.1816	180.168	3.52201
0.1117	-178.502	82.2083	-5.02292		0.1117	-39.0316	179.258	1.08061
0.1118	-178.802	77.0183	-4.10739		0.1118	-32.3186	184.438	2.60651
0.1119	-185.212	75.1883	6.26861		0.1119	-31.4026	190.238	5.96361
0.112	-174.832	80.9883	-7.76949		0.112	-24.9936	191.158	1.08061
0.1121	-170.562	92.5883	-8.37989		0.1121	-30.4876	194.508	-3.80221
0.1122	-170.872	83.7383	-0.14009		0.1122	-24.0786	199.398	-1.66599
0.1123	-165.682	82.2083	2.91161		0.1123	-34.4546	200.008	0.47021
0.1124	-165.372	92.5883	-4.71774		0.1124	-26.2146	200.918	-0.75049
0.1125	-166.592	83.7383	6.87861		0.1125	-30.7926	203.668	0.47021
0.1126	-165.982	75.4983	-5.63329		0.1126	-35.3696	205.198	-1.97119
0.1127	-169.042	84.0383	-4.71774		0.1127	-31.4026	207.638	-3.80221
0.1128	-160.192	78.8483	-1.66599		0.1128	-30.7926	209.468	-6.24359
0.1129	-164.462	79.7683	2.91161		0.1129	-30.1816	213.438	4.13231
0.113	-158.662	87.6983	-3.19186		0.113	-30.7926	210.688	-1.97119
0.1131	-158.962	81.5983	-3.80221		0.1131	-33.8436	204.588	-4.41257
0.1132	-160.802	95.6383	-3.19186		0.1132	-32.0126	203.058	3.52201
0.1133	-158.052	94.1083	-5.93849		0.1133	-25.6046	214.348	-0.14009
0.1134	-157.132	90.7583	-3.80221		0.1134	-19.5006	206.718	1.69091
0.1135	-156.222	89.5283	-2.27629		0.1135	-24.6886	213.438	8.70961
0.1136	-162.932	95.9383	-3.49704		0.1136	-24.3836	214.658	-2.88669
0.1137	-158.662	91.6683	-5.93849		0.1137	-28.9616	206.108	8.40461
0.1138	-159.272	90.7583	-5.02292		0.1138	-25.6046	200.008	2.30131
0.1139	-160.492	100.218	-1.97119		0.1139	-31.0976	205.808	1.99611
0.114	-163.852	102.348	-0.14009		0.114	-31.7076	200.308	1.69091
0.1141	-163.852	95.6383	0.77541		0.1141	-33.5386	205.198	7.48961
0.1142	-153.172	99.6083	3.21681		0.1142	-35.6746	197.568	1.99611
0.1143	-159.882	86.1783	-13.5678		0.1143	-39.6426	210.078	-3.19186
0.1144	-155.612	94.1083	-23.9434		0.1144	-39.0316	203.978	4.43751
0.1145	-152.252	90.1383	-71.5514		0.1145	-23.1626	209.768	-2.88669
0.1146	-156.222	94.7183	-293.417		0.1146	-39.6426	214.348	-1.97119
0.1147	-153.172	94.4183	-13.5678		0.1147	-32.9286	213.438	-0.14009
0.1148	-155.612	98.9883	168.013		0.1148	-37.2006	221.678	-0.44529
0.1149	-153.782	102.348	142.983		0.1149	-39.9476	215.878	1.38581
0.115	-157.442	96.2483	86.8346		0.115	-35.6746	225.638	-3.49704
0.1151	-150.422	91.0583	28.5466		0.1151	-30.1816	213.738	4.74271
0.1152	-154.692	100.828	1.99611		0.1152	-36.2856	220.758	-1.66599
0.1153	-154.692	84.3483	7.18461		0.1153	-29.8766	218.618	4.43751
0.1154	-153.782	94.1083	-1.36079		0.1154	-41.7786	213.128	-1.05559
0.1155	-152.862	97.7683	-5.02292		0.1155	-40.8626	207.638	-1.05559
0.1156	-151.342	90.1383	-2.88669		0.1156	-47.2716	205.808	-4.10739
0.1157	-155.002	95.6383	-1.97119		0.1157	-35.3696	212.828	3.21681
0.1158	-149.812	93.8083	3.52201		0.1158	-47.5766	208.858	-0.75049
0.1159	-146.152	92.2783	-6.85399		0.1159	-39.0316	206.108	4.74271
0.116	-154.392	92.8883	-4.41257		0.116	-43.6096	214.958	-2.88669
0.1161	-159.572	92.2783	-3.80221		0.1161	-46.3566	208.248	7.18461
0.1162	-155.302	89.5283	5.04791		0.1162	-42.3886	203.368	-1.05559
0.1163	-156.222	88.0083	1.38581		0.1163	-38.7266	200.308	6.57361
0.1164	-162.322	77.0183	-7.76949		0.1164	-42.6946	210.378	-7.76949
0.1165	-160.192	79.1583	1.99611		0.1165	-42.3886	212.828	6.26861
0.1166	-161.712	95.6383	-1.97119		0.1166	-34.1496	210.378	5.96361
0.1167	-162.022	81.2883	-8.68499		0.1167	-28.3506	199.398	-4.41257
0.1168	-164.462	91.3683	-0.75049		0.1168	-42.0836	194.818	-1.05559
0.1169	-169.652	86.1783	-4.41257		0.1169	-33.2336	198.788	9.93061
0.117	-173.612	84.3483	-2.27629		0.117	-31.7076	189.328	1.69091
0.1171	-169.342	81.9083	-5.32809		0.1171	-28.0456	195.738	7.48961
0.1172	-170.262	84.6483	3.82721		0.1172	-39.3376	192.988	-0.75049
0.1173	-181.242	85.8683	5.04791		0.1173	-32.9286	183.828	0.47021
0.1174	-176.362	87.6983	3.21681		0.1174	-37.5066	183.218	-0.75049
0.1175	-180.022	86.4783	3.21681		0.1175	-31.7076	196.648	1.08061
0.1176	-191.922	76.4083	0.16511		0.1176	-37.5066	189.628	4.74271
0.1177	-188.872	79.1583	-3.49704		0.1177	-37.5066	183.828	0.16511
0.1178	-192.532	80.0683	-1.05559		0.1178	-37.2006	182.608	2.60651
0.1179	-192.842	78.8483	1.08061		0.1179	-34.4546	189.018	2.60651
0.118	-193.452	74.8883	-3.49704		0.118	-35.9806	185.048	4.43751
0.1181	-190.092	80.9883	-9.90569		0.1181	-37.2006	191.768	10.5406
0.1182	-195.592	74.5783	-8.99019		0.1182	-41.7786	188.108	2.91161
0.1183	-195.282	75.7983	-13.5678		0.1183	-33.2336	189.328	5.65821
0.1184	-199.252	73.9683	-7.76949		0.1184	-32.9286	191.158	3.82721
0.1185	-200.162	81.5983	-21.1974		0.1185	-24.9936	195.428	-6.85399
0.1186	-202.302	70.6083	-106.037		0.1186	-27.7406	198.178	6.57361
0.1187	-208.402	77.0183	-243.667		0.1187	-34.4546	200.918	5.04791
0.1188	-206.882	78.8483	64.8626		0.1188	-35.6746	199.398	7.79461
0.1189	-213.592	76.4083	163.743		0.1189	-34.7596	200.618	4.43751
0.119	-219.082	71.5283	131.693		0.119	-38.7266	220.448	7.18461
0.1191	-220.612	82.8183	50.2136		0.1191	-35.6746	211.298	-0.75049
0.1192	-223.052	72.4383	25.4946		0.1192	-35.3696	205.808	-2.58149
0.1193	-214.202	79.7683	4.43751		0.1193	-33.8436	214.048	-2.27629
0.1194	-217.252	81.9083	-0.14009		0.1194	-31.7076	216.178	2.30131
0.1195	-223.972	75.7983	0.47021		0.1195	-34.1496	221.068	-2.27629
0.1196	-218.172	63.8983	-4.71774		0.1196	-35.3696	223.808	4.74271
0.1197	-218.472	74.2783	-9.29539		0.1197	-32.6236	224.728	3.21681
0.1198	-227.322	71.8283	-4.71774		0.1198	-35.0646	229.918	2.60651
0.1199	-210.542	74.5783	-0.44529		0.1199	-28.3506	235.708	4.74271
0.12	-213.592	69.3883	-8.68499		0.12	-24.0786	229.308	5.04791
0.1201	-214.202	66.0383	-12.6523		0.1201	-29.8766	239.378	-1.36079
0.1202	-222.142	70.9183	-1.36079		0.1202	-28.6556	244.258	-2.27629
0.1203	-228.542	78.5483	-17.2304		0.1203	-30.1816	238.458	0.77541
0.1204	-223.972	69.9983	-5.93849		0.1204	-20.1116	259.818	3.21681
0.1205	-214.812	82.5183	-7.46429		0.1205	-35.3696	247.308	2.60651
0.1206	-220.612	79.4583	-6.85399		0.1206	-34.7596	250.358	3.82721
0.1207	-209.012	89.5283	-4.10739		0.1207	-30.4876	245.478	-1.36079
0.1208	-221.222	90.4483	-4.10739		0.1208	-21.9426	264.708	4.13231
0.1209	-217.252	94.4183	2.91161		0.1209	-34.7596	262.568	1.38581
0.121	-220.002	88.0083	-4.10739		0.121	-37.2006	268.978	1.08061
0.1211	-220.302	91.0583	-6.54879		0.1211	-38.7266	282.098	1.38581
0.1212	-212.682	96.8583	0.77541		0.1212	-28.3506	288.198	3.82721
0.1213	-221.832	98.6883	-4.10739		0.1213	-28.3506	299.798	5.96361
0.1214	-225.802	96.8583	-4.10739		0.1214	-35.3696	303.158	-2.27629
0.1215	-219.082	96.8583	5.96361		0.1215	-32.9286	303.768	4.43751
0.1216	-228.852	102.048	-10.5161		0.1216	-34.7596	312.008	3.52201
0.1217	-229.462	100.828	-1.36079		0.1217	-35.0646	319.638	6.26861
0.1218	-239.232	109.978	-2.88669		0.1218	-43.3046	321.158	-1.05559
0.1219	-227.932	113.948	1.38581		0.1219	-27.7406	324.518	-5.93849
0.122	-224.582	117.918	-1.05559		0.122	-28.6556	336.728	-3.19186
0.1221	-227.022	108.458	-1.05559		0.1221	-36.2856	339.168	-1.36079
0.1222	-230.992	118.528	-1.05559		0.1222	-33.2336	324.208	-4.71774
0.1223	-234.042	120.358	-2.58149		0.1223	-34.1496	331.538	3.21681
0.1224	-236.482	117.608	-1.36079		0.1224	-34.4546	334.898	-10.8213
0.1225	-237.092	121.268	7.79461		0.1225	-35.0646	336.418	-0.75049
0.1226	-229.462	126.158	-0.44529		0.1226	-33.5386	345.578	-3.80221
0.1227	-226.412	124.018	-1.66599		0.1227	-29.8766	345.878	8.40461
0.1228	-228.242	131.038	-0.14009		0.1228	-24.0786	348.628	1.38581
0.1229	-216.642	124.018	1.08061		0.1229	-30.7926	345.878	1.38581
0.123	-216.342	131.948	-6.24359		0.123	-35.6746	343.138	-4.41257
0.1231	-223.972	135.918	-14.4834		0.1231	-29.2666	343.748	3.52201
0.1232	-217.252	132.258	-25.4694		0.1232	-31.0976	337.338	4.43751
0.1233	-225.192	135.308	-85.8944		0.1233	-34.4546	337.638	-2.27629
0.1234	-218.782	130.428	-290.667		0.1234	-26.2146	337.028	-2.58149
0.1235	-227.632	135.618	-1.97119		0.1235	-41.7786	348.018	3.21681
0.1236	-227.322	126.768	160.993		0.1236	-39.6426	340.388	1.08061
0.1237	-230.682	132.868	132.913		0.1237	-39.9476	337.638	0.16511
0.1238	-238.622	126.458	81.6466		0.1238	-42.0836	327.568	-2.27629
0.1239	-239.532	143.548	28.8516		0.1239	-34.1496	323.908	3.52201
0.124	-233.732	140.188	12.0666		0.124	-30.4876	330.928	5.35301
0.1241	-226.712	134.698	2.30131		0.1241	-36.5906	329.098	-1.66599
0.1242	-220.302	132.258	4.13231		0.1242	-40.2526	324.828	-2.27629
0.1243	-227.022	136.838	-2.88669		0.1243	-41.4736	317.498	7.48961
0.1244	-236.482	131.338	0.16511		0.1244	-37.5066	321.158	10.8466
0.1245	-246.242	138.058	0.16511		0.1245	-42.0836	315.358	2.60651
0.1246	-246.552	131.338	-3.80221		0.1246	-42.9996	312.008	2.60651
0.1247	-244.722	135.008	-11.7368		0.1247	-38.1166	312.918	7.18461
0.1248	-238.312	133.478	-4.10739		0.1248	-47.5766	305.898	-2.27629
0.1249	-246.242	140.498	1.38581		0.1249	-45.1356	303.768	1.38581
0.125	-241.062	135.918	-5.32809		0.125	-50.3236	308.648	0.16511
0.1251	-241.972	141.408	-6.24359		0.1251	-47.8826	308.958	1.38581
0.1252	-252.962	142.938	0.16511		0.1252	-52.7646	308.348	-4.71774
0.1253	-251.132	139.888	-6.85399		0.1253	-53.0706	313.838	-0.44529
0.1254	-249.302	134.398	4.74271		0.1254	-48.4926	303.458	4.13231
0.1255	-252.352	133.168	0.77541		0.1255	-46.9666	294.608	-2.88669
0.1256	-253.262	133.788	-4.10739		0.1256	-49.1026	298.578	-3.80221
0.1257	-238.312	135.918	-1.36079		0.1257	-44.5256	295.218	-1.97119
0.1258	-250.212	124.928	4.43751		0.1258	-41.1686	289.418	1.69091
0.1259	-252.042	124.928	-1.66599		0.1259	-41.4736	301.328	3.52201
0.126	-256.322	146.298	-2.88669		0.126	-52.1546	287.288	4.74271
0.1261	-246.862	134.398	-0.44529		0.1261	-48.4926	282.408	1.38581
0.1262	-246.552	137.748	-5.63329		0.1262	-49.1026	283.018	-2.88669
0.1263	-244.112	133.478	0.77541		0.1263	-49.4076	286.068	5.04791
0.1264	-241.062	136.228	-4.71774		0.1264	-47.2716	285.148	1.99611
0.1265	-241.672	130.728	-4.10739		0.1265	-36.5906	283.628	0.16511
0.1266	-247.162	135.008	1.69091		0.1266	-40.8626	294.608	-1.05559
0.1267	-250.822	133.168	-5.32809		0.1267	-46.3566	293.088	4.43751
0.1268	-255.402	135.918	-7.46429		0.1268	-36.8956	301.628	-4.10739
0.1269	-255.092	133.788	-17.2304		0.1269	-44.5256	302.238	2.91161
0.127	-250.212	132.258	-73.3824		0.127	-41.1686	304.988	7.48961
0.1271	-251.742	127.988	-273.277		0.1271	-47.5766	307.118	-4.71774
0.1272	-243.192	127.678	0.16511		0.1272	-47.2716	304.068	2.60651
0.1273	-259.062	121.268	157.333		0.1273	-42.6946	310.178	9.01561
0.1274	-254.792	127.678	139.023		0.1274	-42.6946	305.288	-0.44529
0.1275	-254.182	131.648	88.3606		0.1275	-48.4926	312.308	-4.10739
0.1276	-256.932	126.458	40.4486		0.1276	-38.1166	305.598	-0.14009
0.1277	-261.202	123.708	16.9496		0.1277	-46.6616	320.248	0.47021
0.1278	-263.332	124.018	7.18461		0.1278	-40.8626	312.008	-5.63329
0.1279	-263.942	121.268	1.99611		0.1279	-37.8116	321.468	-0.44529
0.128	-270.962	123.408	-5.93849		0.128	-34.4546	314.448	-4.41257
0.1281	-274.322	119.438	-1.05559		0.1281	-42.6946	317.808	1.69091
0.1282	-272.802	127.378	-3.49704		0.1282	-37.2006	321.468	-5.93849
0.1283	-273.412	123.408	-9.60059		0.1283	-46.3566	314.138	2.60651
0.1284	-281.652	123.408	-2.88669		0.1284	-32.9286	321.468	1.38581
0.1285	-285.002	119.748	2.91161		0.1285	-40.8626	329.708	3.82721
0.1286	-284.392	126.768	-13.5678		0.1286	-41.1686	316.888	7.18461
0.1287	-283.172	126.158	0.16511		0.1287	-34.1496	328.488	-1.36079
0.1288	-279.512	123.708	0.16511		0.1288	-36.8956	316.588	3.52201
0.1289	-278.592	120.048	-2.88669		0.1289	-40.2526	319.938	5.04791
0.129	-285.922	117.308	-6.54879		0.129	-36.8956	323.908	3.82721
0.1291	-283.782	135.008	-2.58149		0.1291	-30.1816	317.498	0.77541
0.1292	-282.262	138.668	1.99611		0.1292	-36.8956	319.028	1.99611
0.1293	-283.172	138.358	-5.93849		0.1293	-43.9146	312.918	3.52201
0.1294	-286.832	146.298	-3.80221		0.1294	-34.1496	320.548	0.16511
0.1295	-291.112	142.938	0.77541		0.1295	-43.6096	318.108	-0.14009
0.1296	-291.112	142.328	-2.88669		0.1296	-41.4736	314.748	-6.24359
0.1297	-295.682	155.148	3.82721		0.1297	-49.1026	318.418	3.21681
0.1298	-298.742	148.128	2.91161		0.1298	-42.6946	320.858	4.43751
0.1299	-302.702	158.498	-2.58149		0.1299	-33.8436	321.768	3.52201
0.13	-290.802	166.438	-4.10739		0.13	-39.0316	324.518	1.69091
0.1301	-296.292	166.128	-4.10739		0.1301	-38.7266	321.158	-2.88669
0.1302	-296.292	163.688	-5.32809		0.1302	-46.6616	315.968	4.43751
0.1303	-286.532	175.288	0.77541		0.1303	-35.6746	325.738	-4.41257
0.1304	-273.412	183.218	1.08061		0.1304	-42.0836	336.418	0.16511
0.1305	-289.882	183.528	-4.10739		0.1305	-40.8626	333.978	0.77541
0.1306	-287.442	191.768	-12.9575		0.1306	-35.0646	339.778	1.99611
0.1307	-286.222	192.678	-27.3004		0.1307	-35.9806	345.268	0.47021
0.1308	-288.972	199.088	-23.6384		0.1308	-42.6946	351.068	-3.49704
0.1309	-287.142	207.938	-66.3634		0.1309	-41.4736	347.708	1.69091
0.131	-289.582	207.028	-239.397		0.131	-49.4076	352.598	-10.5161
0.1311	-279.202	215.268	14.2036		0.1311	-53.9856	353.508	-0.44529
0.1312	-281.032	221.068	135.363		0.1312	-57.0376	344.968	-3.80221
0.1313	-282.562	224.418	120.713		0.1313	-42.3886	350.148	-3.19186
0.1314	-273.102	227.468	84.0886		0.1314	-56.1216	353.508	-1.36079
0.1315	-282.872	225.338	35.8706		0.1315	-50.9336	341.608	-1.97119
0.1316	-277.072	236.928	12.0666		0.1316	-50.3236	360.838	6.26861
0.1317	-270.352	234.188	7.18461		0.1317	-53.9856	362.358	3.82721
0.1318	-283.782	233.578	-0.44529		0.1318	-46.9666	355.948	2.91161
0.1319	-290.192	233.878	-7.76949		0.1319	-53.3756	365.718	2.60651
0.132	-295.992	237.238	-4.71774		0.132	-49.1026	369.078	-1.66599
0.1321	-298.432	235.098	-8.37989		0.1321	-48.1876	366.328	1.38581
0.1322	-303.622	234.188	-5.93849		0.1322	-47.2716	364.498	1.38581
0.1323	-306.362	233.578	3.21681		0.1323	-46.3566	370.598	1.08061
0.1324	-291.112	244.258	-0.44529		0.1324	-56.4266	378.228	-7.46429
0.1325	-295.992	248.838	-5.02292		0.1325	-59.1736	375.178	2.30131
0.1326	-295.682	246.388	0.16511		0.1326	-51.8496	373.038	-8.68499
0.1327	-300.572	245.778	3.52201		0.1327	-59.1736	373.648	5.96361
0.1328	-313.992	244.258	4.43751		0.1328	-79.0116	374.258	-1.05559
0.1329	-302.402	248.528	-4.10739		0.1329	-66.4976	387.078	0.47021
0.133	-317.662	247.918	9.93061		0.133	-65.2776	377.318	10.8466
0.1331	-332.002	253.408	2.30131		0.1331	-63.4456	377.928	2.91161
0.1332	-321.932	248.528	-0.44529		0.1332	-62.8356	387.998	-6.85399
0.1333	-332.002	260.738	-5.93849		0.1333	-66.4976	384.328	5.96361
0.1334	-329.252	251.578	-2.58149		0.1334	-74.1316	385.858	5.65821
0.1335	-328.032	245.168	-4.71774		0.1335	-74.1316	404.778	-0.75049
0.1336	-329.862	264.708	-0.75049		0.1336	-64.0566	394.408	0.47021
0.1337	-340.542	263.788	-2.88669		0.1337	-75.9616	410.578	4.74271
0.1338	-335.052	268.668	-6.24359		0.1338	-70.7716	409.658	2.60651
0.1339	-335.972	283.318	-5.32809		0.1339	-72.2916	424.308	2.30131
0.134	-335.972	280.268	3.52201		0.134	-79.9216	427.358	0.47021
0.1341	-336.582	288.508	-3.80221		0.1341	-71.9916	430.418	-1.66599
0.1342	-339.932	292.778	5.35301		0.1342	-68.6336	443.838	0.47021
0.1343	-337.192	294.918	0.77541		0.1343	-78.4016	450.248	-0.14009
0.1344	-347.872	308.348	-1.36079		0.1344	-84.5016	435.908	-2.88669
0.1345	-335.972	313.228	-1.36079		0.1345	-76.2616	438.048	4.13231
0.1346	-326.812	321.158	-0.14009		0.1346	-71.6816	442.618	-0.75049
0.1347	-342.072	326.958	-4.10739		0.1347	-79.3116	441.098	0.47021
0.1348	-330.782	325.438	-0.75049		0.1348	-78.4016	445.668	-1.97119
0.1349	-331.392	333.978	2.30131		0.1349	-78.0916	453.908	-4.71774
0.135	-326.812	337.638	-2.58149		0.135	-91.5216	461.538	1.69091
0.1351	-320.712	341.908	-3.49704		0.1351	-74.4316	458.488	-5.32809
0.1352	-324.372	352.288	-0.75049		0.1352	-81.7616	454.218	0.77541
0.1353	-320.102	361.748	-29.7424		0.1353	-89.9916	459.098	1.69091
0.1354	-321.622	358.998	-4.10739		0.1354	-85.1116	466.118	5.35301
0.1355	-321.932	358.998	-3.80221		0.1355	-84.2016	474.358	0.77541
0.1356	-328.342	361.748	3.82721		0.1356	-97.3216	468.558	4.43751
0.1357	-340.852	378.538	-22.4184		0.1357	-94.2716	481.378	3.82721
0.1358	-331.392	375.788	-41.3384		0.1358	-93.3516	488.088	-7.15919
0.1359	-335.362	381.278	-62.0904		0.1359	-88.1616	489.618	3.82721
0.136	-323.152	385.248	-185.987		0.136	-89.9916	492.058	-4.10739
0.1361	-325.292	385.858	-6.24359		0.1361	-95.7916	500.608	2.91161
0.1362	-329.562	384.638	107.893		0.1362	-88.4716	489.008	-6.24359
0.1363	-333.832	387.688	105.143		0.1363	-97.0116	493.588	3.21681
0.1364	-332.302	395.018	85.0036		0.1364	-84.2016	501.518	1.99611
0.1365	-339.022	382.808	47.4676		0.1365	-92.1316	500.608	-5.63329
0.1366	-343.902	376.088	11.1516		0.1366	-83.5916	503.958	5.35301
0.1367	-342.682	377.928	5.96361		0.1367	-91.5216	502.128	1.69091
0.1368	-357.022	386.168	1.99611		0.1368	-85.1116	518.608	1.69091
0.1369	-349.392	395.318	5.04791		0.1369	-96.7116	526.848	-3.80221
0.137	-350.002	394.708	-9.29539		0.137	-83.5916	535.698	-0.14009
0.1371	-346.652	398.368	-3.19186		0.1371	-87.5516	549.428	-1.05559
0.1372	-351.532	398.678	-3.49704		0.1372	-83.2816	553.398	2.60651
0.1373	-350.922	405.998	-8.07469		0.1373	-82.9816	561.638	-1.97119
0.1374	-352.752	409.658	-1.66599		0.1374	-83.8916	570.798	-0.14009
0.1375	-357.022	419.118	0.77541		0.1375	-83.5916	569.878	-3.80221
0.1376	-353.362	408.748	-3.49704		0.1376	-98.2316	579.038	1.69091
0.1377	-342.992	408.438	-3.19186		0.1377	-101.902	579.648	4.74271
0.1378	-350.002	419.728	-1.66599		0.1378	-108.612	580.558	7.18461
0.1379	-344.512	409.968	-3.49704		0.1379	-116.852	580.258	5.65821
0.138	-346.952	415.458	0.47021		0.138	-104.032	586.358	5.35301
0.1381	-347.562	413.628	-7.15919		0.1381	-115.632	590.628	1.08061
0.1382	-349.092	428.578	5.35301		0.1382	-106.782	589.718	5.04791
0.1383	-343.602	423.088	-5.63329		0.1383	-108.312	596.738	-2.58149
0.1384	-348.482	416.068	-4.10739		0.1384	-116.242	595.208	-1.36079
0.1385	-353.362	427.968	3.52201		0.1385	-124.172	603.448	-0.14009
0.1386	-351.842	411.798	-1.66599		0.1386	-109.832	610.158	-1.66599
0.1387	-342.382	418.508	0.16511		0.1387	-106.782	616.568	-0.44529
0.1388	-338.712	421.568	-1.66599		0.1388	-110.752	617.178	2.91161
0.1389	-343.292	423.398	-2.27629		0.1389	-112.272	602.838	1.38581
0.139	-337.492	418.208	-3.19186		0.139	-109.832	614.128	1.38581
0.1391	-346.952	414.848	-0.14009		0.1391	-106.472	603.448	-6.54879
0.1392	-340.242	425.228	-4.10739		0.1392	-104.032	601.308	4.74271
0.1393	-341.762	415.158	-11.4316		0.1393	-113.492	603.148	-1.97119
0.1394	-341.462	400.808	-0.75049		0.1394	-101.292	598.258	-0.75049
0.1395	-338.102	413.938	-1.05559		0.1395	-104.952	592.158	-1.36079
0.1396	-337.802	411.188	0.47021		0.1396	-105.562	594.598	-1.05559
0.1397	-351.232	411.188	0.77541		0.1397	-103.422	594.908	-4.10739
0.1398	-339.932	407.828	-0.14009		0.1398	-100.372	592.768	-2.27629
0.1399	-353.672	411.798	-5.93849		0.1399	-100.682	604.978	-0.75049
0.14	-360.992	413.328	-0.75049		0.14	-99.7616	591.238	5.96361
0.1401	-359.162	408.748	5.96361		0.1401	-105.562	585.748	-2.27629
0.1402	-369.232	414.238	-6.24359		0.1402	-110.752	593.378	3.82721
0.1403	-368.622	407.828	-0.44529		0.1403	-104.642	587.278	-0.14009
0.1404	-367.402	402.948	-8.07469		0.1404	-100.372	576.288	1.38581
0.1405	-365.572	411.798	-4.41257		0.1405	-103.422	575.678	1.69091
0.1406	-371.062	403.868	2.60651		0.1406	-94.8816	583.918	2.30131
0.1407	-385.712	410.878	-4.41257		0.1407	-94.5716	588.798	4.43751
0.1408	-380.522	405.998	-8.99019		0.1408	-98.2316	588.188	2.91161
0.1409	-377.172	405.698	-9.60059		0.1409	-94.8816	580.868	1.08061
0.141	-374.422	404.778	-24.8594		0.141	-96.1016	589.108	7.18461
0.1411	-388.462	405.388	-27.9114		0.1411	-96.7116	598.868	3.82721
0.1412	-391.512	411.798	-83.7584		0.1412	-93.0516	605.278	-5.32809
0.1413	-401.882	413.628	-223.527		0.1413	-100.682	602.538	-1.66599
0.1414	-394.562	405.388	32.2086		0.1414	-111.362	612.298	14.8136
0.1415	-400.972	415.768	139.633		0.1415	-96.7116	609.548	0.47021
0.1416	-407.992	408.438	135.053		0.1416	-102.202	608.638	-3.19186
0.1417	-418.362	413.328	73.1016		0.1417	-109.832	612.298	5.04791
0.1418	-399.752	417.598	35.8706		0.1418	-100.982	612.908	8.09961
0.1419	-395.782	421.568	9.32061		0.1419	-113.492	611.078	1.38581
0.142	-389.982	419.728	-0.75049		0.142	-103.422	608.938	-0.14009
0.1421	-396.392	425.838	-4.10739		0.1421	-103.732	614.738	-1.66599
0.1422	-403.112	431.938	-4.71774		0.1422	-107.392	612.298	-1.36079
0.1423	-404.942	434.988	-1.36079		0.1423	-111.052	611.388	-1.05559
0.1424	-415.312	442.318	0.77541		0.1424	-115.932	616.268	-0.75049
0.1425	-415.622	451.468	-0.14009		0.1425	-111.362	615.348	0.16511
0.1426	-420.192	454.518	-0.75049		0.1426	-116.552	619.618	-1.66599
0.1427	-418.362	451.778	-8.99019		0.1427	-125.702	613.218	-4.71774
0.1428	-418.362	460.928	-4.10739		0.1428	-118.072	620.238	-0.14009
0.1429	-428.432	454.828	-1.36079		0.1429	-120.212	625.728	1.08061
0.143	-420.502	462.148	-1.36079		0.143	-126.012	625.418	-2.88669
0.1431	-427.212	464.598	-1.05559		0.1431	-122.342	633.358	-4.71774
0.1432	-427.212	459.408	-3.19186		0.1432	-111.662	629.088	2.60651
0.1433	-438.202	453.608	3.82721		0.1433	-121.122	632.438	0.16511
0.1434	-430.882	460.928	1.08061		0.1434	-113.492	625.728	1.99611
0.1435	-438.512	453.608	2.60651		0.1435	-120.212	629.388	-4.10739
0.1436	-437.592	459.098	2.91161		0.1436	-116.552	630.308	0.77541
0.1437	-439.732	457.878	-3.80221		0.1437	-120.212	630.308	-0.14009
0.1438	-447.972	457.878	1.69091		0.1438	-131.502	637.938	-5.93849
0.1439	-447.972	462.148	-3.19186		0.1439	-125.402	631.528	3.21681
0.144	-444.302	466.118	-1.05559		0.144	-134.862	635.798	8.70961
0.1441	-446.442	461.848	0.47021		0.1441	-135.772	633.358	5.04791
0.1442	-437.282	456.968	-0.75049		0.1442	-135.472	641.598	1.69091
0.1443	-430.882	467.648	1.08061		0.1443	-123.872	636.708	1.69091
0.1444	-429.352	461.238	1.38581		0.1444	-134.862	632.748	1.08061
0.1445	-429.662	458.488	5.35301		0.1445	-120.512	628.168	-1.97119
0.1446	-433.322	462.758	3.52201		0.1446	-121.732	625.418	0.77541
0.1447	-436.672	461.848	2.60651		0.1447	-124.782	628.468	1.99611
0.1448	-447.362	461.238	1.38581		0.1448	-120.212	633.968	2.30131
0.1449	-445.222	460.018	-1.36079		0.1449	-117.462	623.898	1.99611
0.145	-437.902	457.878	2.60651		0.145	-118.992	619.318	3.82721
0.1451	-433.322	467.338	-1.66599		0.1451	-124.482	622.978	-9.29539
0.1452	-432.102	452.998	4.43751		0.1452	-122.652	615.048	5.35301
0.1453	-441.252	465.818	0.16511		0.1453	-120.822	622.368	-1.97119
0.1454	-444.612	454.518	2.30131		0.1454	-115.022	618.708	0.16511
0.1455	-443.392	460.018	-4.10739		0.1455	-114.712	603.448	6.26861
0.1456	-447.972	458.488	0.77541		0.1456	-104.952	609.548	6.26861
0.1457	-443.082	454.518	-1.36079		0.1457	-114.412	619.618	5.35301
0.1458	-444.002	463.988	5.96361		0.1458	-110.142	608.938	0.16511
0.1459	-437.282	458.488	5.04791		0.1459	-115.322	617.788	4.43751
0.146	-432.102	463.068	3.82721		0.146	-109.532	616.878	-7.15919
0.1461	-444.302	462.148	1.38581		0.1461	-110.442	618.398	2.30131
0.1462	-439.732	466.728	5.04791		0.1462	-119.292	628.168	-3.19186
0.1463	-435.452	465.818	-2.27629		0.1463	-121.732	632.138	-2.88669
0.1464	-433.932	465.818	3.52201		0.1464	-114.102	638.548	0.16511
0.1465	-434.232	467.338	-2.58149		0.1465	-113.492	640.678	-3.80221
0.1466	-432.712	466.118	0.77541		0.1466	-111.662	646.178	3.82721
0.1467	-440.032	458.798	-3.19186		0.1467	-119.902	640.678	-3.80221
0.1468	-440.642	467.338	5.04791		0.1468	-129.672	647.398	0.77541
0.1469	-440.642	463.678	4.13231		0.1469	-120.512	638.548	5.65821
0.147	-430.272	463.678	3.82721		0.147	-115.932	644.948	0.77541
0.1471	-430.272	464.598	1.99611		0.1471	-110.142	644.648	5.04791
0.1472	-419.582	464.898	6.26861		0.1472	-112.882	649.228	0.47021
0.1473	-423.862	457.578	-4.71774		0.1473	-119.292	637.328	2.30131
0.1474	-428.432	464.288	-3.80221		0.1474	-114.712	641.898	5.96361
0.1475	-424.772	458.188	9.62561		0.1475	-117.772	640.068	8.40461
0.1476	-417.752	467.648	1.69091		0.1476	-119.292	630.608	1.99611
0.1477	-407.382	467.038	4.13231		0.1477	-129.062	629.388	-3.19186
0.1478	-399.752	461.848	3.21681		0.1478	-129.672	624.808	1.99611
0.1479	-397.312	478.018	0.47021		0.1479	-130.892	633.358	9.01561
0.148	-403.722	485.348	2.91161		0.148	-122.952	623.588	-2.88669
0.1481	-407.682	480.768	2.30131		0.1481	-126.622	635.798	1.69091
0.1482	-403.722	492.058	6.26861		0.1482	-131.502	633.358	1.08061
0.1483	-407.682	487.178	3.52201		0.1483	-125.092	629.698	-0.44529
0.1484	-407.682	498.468	-8.68499		0.1484	-135.772	629.388	2.91161
0.1485	-410.732	521.658	0.16511		0.1485	-126.622	631.528	-6.24359
0.1486	-425.692	525.018	-1.05559		0.1486	-123.872	625.418	4.13231
0.1487	-427.822	537.528	3.82721		0.1487	-132.412	624.808	-0.14009
0.1488	-425.082	542.108	-3.49704		0.1488	-140.042	615.658	4.43751
0.1489	-427.822	562.248	1.08061		0.1489	-133.942	617.178	-0.44529
0.149	-422.032	557.668	3.52201		0.149	-132.112	621.458	-1.97119
0.1491	-420.192	562.858	3.82721		0.1491	-132.412	615.958	-2.27629
0.1492	-404.022	565.608	1.38581		0.1492	-127.842	607.418	6.87861
0.1493	-411.042	575.678	0.16511		0.1493	-126.922	615.048	4.74271
0.1494	-400.662	570.188	4.74271		0.1494	-129.062	608.638	3.21681
0.1495	-394.562	574.148	-0.44529		0.1495	-130.582	619.318	-3.80221
0.1496	-410.732	584.528	3.82721		0.1496	-116.852	616.878	-5.32809
0.1497	-404.332	573.238	5.65821		0.1497	-131.802	622.068	5.96361
0.1498	-400.052	581.778	0.77541		0.1498	-129.972	630.918	5.04791
0.1499	-402.192	587.278	-1.36079		0.1499	-121.122	633.968	-0.44529
0.15	-397.312	598.868	-0.14009		0.15	-128.142	649.838	0.77541
0.1501	-376.252	582.088	1.08061		0.1501	-118.382	653.798	-0.44529
0.1502	-377.172	593.378	1.69091		0.1502	-115.932	659.908	5.04791
0.1503	-388.762	607.718	3.21681		0.1503	-111.972	668.448	-1.36079
0.1504	-388.762	628.778	1.99611		0.1504	-110.442	674.858	3.52201
0.1505	-387.242	631.828	0.16511		0.1505	-105.562	680.658	1.99611
0.1506	-389.682	639.768	5.65821		0.1506	-100.982	683.408	-1.66599
0.1507	-386.932	651.968	0.47021		0.1507	-99.7616	677.908	2.91161
0.1508	-384.792	644.948	-4.10739		0.1508	-104.952	680.968	1.38581
0.1509	-397.312	644.338	-1.66599		0.1509	-100.072	684.928	0.77541
0.151	-389.372	646.788	-1.97119		0.151	-105.562	674.558	4.74271
0.1511	-391.512	646.178	7.48961		0.1511	-100.682	680.348	7.79461
0.1512	-384.492	650.138	1.99611		0.1512	-111.052	688.288	-1.05559
0.1513	-393.342	657.158	6.26861		0.1513	-111.362	680.658	-0.44529
0.1514	-394.562	662.038	-1.97119		0.1514	-120.212	670.588	-6.54879
0.1515	-392.732	659.598	-1.97119		0.1515	-118.992	674.248	-6.54879
0.1516	-397.612	673.638	5.35301		0.1516	-132.412	670.888	-3.80221
0.1517	-400.972	683.098	2.30131		0.1517	-139.742	668.758	-4.10739
0.1518	-400.362	681.268	1.99611		0.1518	-144.012	678.828	-8.37989
0.1519	-404.942	680.348	0.16511		0.1519	-147.672	675.468	0.16511
0.152	-406.162	680.658	-8.37989		0.152	-140.962	672.728	1.99611
0.1521	-402.192	680.658	2.91161		0.1521	-139.742	681.578	0.77541
0.1522	-393.952	680.048	2.91161		0.1522	-138.212	666.618	-0.44529
0.1523	-408.902	696.218	0.47021		0.1523	-140.352	673.338	6.26861
0.1524	-409.212	693.778	-2.88669		0.1524	-140.352	676.688	1.38581
0.1525	-409.512	691.338	3.21681		0.1525	-143.102	674.558	0.47021
0.1526	-413.482	692.868	2.30131		0.1526	-147.372	674.858	3.21681
0.1527	-420.192	695.918	2.30131		0.1527	-136.692	677.298	-7.76949
0.1528	-413.182	697.138	-0.14009		0.1528	-149.812	675.468	-1.97119
0.1529	-430.272	692.258	-1.66599		0.1529	-151.952	669.978	-3.19186
0.153	-418.362	718.198	2.30131		0.153	-150.112	674.558	1.38581
0.1531	-416.232	725.518	1.69091		0.1531	-136.992	671.498	-1.05559
0.1532	-412.262	730.398	5.65821		0.1532	-140.042	681.578	-5.32809
0.1533	-409.512	762.748	1.99611		0.1533	-144.322	684.928	-1.97119
0.1534	-414.402	767.328	0.77541		0.1534	-146.452	688.288	-3.49704
0.1535	-404.022	783.498	0.47021		0.1535	-152.252	681.578	9.01561
0.1536	-411.962	801.808	-0.14009		0.1536	-156.222	691.648	-2.27629
0.1537	-414.402	794.488	8.70961		0.1537	-152.862	687.678	-2.88669
0.1538	-410.432	797.538	3.82721		0.1538	-155.912	700.798	-2.88669
0.1539	-430.882	820.128	1.69091		0.1539	-161.102	684.628	-2.88669
0.154	-416.532	841.488	-4.71774		0.154	-151.952	698.358	0.77541
0.1541	-421.422	850.028	0.77541		0.1541	-160.192	692.558	4.13231
0.1542	-419.582	866.508	-1.66599		0.1542	-163.542	694.388	-0.14009
0.1543	-419.582	862.848	5.96361		0.1543	-151.342	702.018	6.57361
0.1544	-429.962	864.378	5.65821		0.1544	-160.802	695.608	6.57361
0.1545	-428.742	858.578	1.69091		0.1545	-161.412	700.798	1.69091
0.1546	-419.892	867.728	1.99611		0.1546	-155.302	698.058	5.65821
0.1547	-427.212	869.258	1.69091		0.1547	-149.202	699.578	7.18461
0.1548	-424.472	875.668	2.60651		0.1548	-159.882	702.938	3.52201
0.1549	-430.272	882.988	2.60651		0.1549	-153.172	705.678	5.96361
0.155	-430.272	882.688	5.96361		0.155	-158.052	707.518	3.21681
0.1551	-428.432	879.938	4.13231		0.1551	-151.642	713.308	5.35301
0.1552	-423.862	874.138	3.21681		0.1552	-144.012	716.978	-9.60059
0.1553	-421.112	880.858	0.77541		0.1553	-151.342	714.838	5.35301
0.1554	-427.822	880.238	3.21681		0.1554	-148.592	714.838	1.38581
0.1555	-425.082	878.718	-1.66599		0.1555	-147.982	706.908	-3.80221
0.1556	-419.282	880.858	3.82721		0.1556	-158.352	712.398	3.21681
0.1557	-416.232	870.778	-0.44529		0.1557	-148.282	725.518	-4.10739
0.1558	-414.092	872.918	-3.80221		0.1558	-149.502	731.618	8.09961
0.1559	-422.942	872.918	2.30131		0.1559	-153.782	744.748	6.26861
0.156	-414.402	874.448	3.21681		0.156	-147.982	733.758	9.32061
0.1561	-410.432	873.838	4.43751		0.1561	-150.722	734.068	5.65821
0.1562	-418.362	871.698	3.82721		0.1562	-144.322	727.658	-2.58149
0.1563	-412.872	863.158	0.16511		0.1563	-138.822	717.588	-1.97119
0.1564	-426.302	862.238	1.99611		0.1564	-144.932	727.048	6.87861
0.1565	-425.992	865.288	-4.10739		0.1565	-142.492	741.998	-1.97119
0.1566	-425.382	856.438	-2.58149		0.1566	-135.472	729.178	0.47021
0.1567	-425.692	853.998	1.08061		0.1567	-136.992	718.808	-1.97119
0.1568	-430.272	860.708	-0.75049		0.1568	-138.212	719.718	1.38581
0.1569	-431.792	857.658	-1.05559		0.1569	-131.802	725.828	2.60651
0.157	-436.372	849.728	5.96361		0.157	-130.282	725.518	1.99611
0.1571	-431.492	864.068	3.21681		0.1571	-144.622	722.468	7.18461
0.1572	-434.842	840.268	0.16511		0.1572	-147.672	727.958	-1.36079
0.1573	-432.712	847.898	9.93061		0.1573	-142.492	715.448	6.57361
0.1574	-433.622	835.078	-0.14009		0.1574	-140.652	726.438	6.87861
0.1575	-432.102	827.448	-14.4834		0.1575	-142.492	713.308	3.82721
0.1576	-438.512	829.888	-0.44529		0.1576	-141.872	723.988	-3.80221
0.1577	-437.282	825.308	-0.75049		0.1577	-139.132	713.618	0.16511
0.1578	-426.602	821.958	-1.66599		0.1578	-137.912	720.638	-0.14009
0.1579	-415.622	828.978	2.30131		0.1579	-134.862	716.368	-1.36079
0.158	-425.692	834.768	2.60651		0.158	-134.252	714.838	-4.71774
0.1581	-421.722	832.028	4.13231		0.1581	-143.712	717.888	1.69091
0.1582	-427.522	841.178	3.52201		0.1582	-138.212	724.908	5.96361
0.1583	-419.282	837.828	12.0666		0.1583	-133.332	723.378	5.65821
0.1584	-414.402	838.128	-1.97119		0.1584	-137.302	720.638	5.35301
0.1585	-417.142	830.498	1.38581		0.1585	-139.132	727.658	2.91161
0.1586	-410.122	839.658	4.13231		0.1586	-127.232	731.318	0.77541
0.1587	-411.042	857.968	3.52201		0.1587	-128.752	723.378	-0.14009
0.1588	-411.652	857.358	4.43751		0.1588	-133.632	727.348	1.69091
0.1589	-419.582	852.468	0.77541		0.1589	-123.872	723.078	1.38581
0.159	-427.522	862.848	-0.44529		0.159	-128.142	719.718	1.38581
0.1591	-423.252	860.098	0.77541		0.1591	-124.782	713.618	4.74271
0.1592	-419.282	865.598	3.82721		0.1592	-123.262	720.028	0.16511
0.1593	-419.582	855.528	-2.27629		0.1593	-115.932	726.128	-0.14009
0.1594	-419.892	868.338	4.13231		0.1594	-115.932	708.128	3.82721
0.1595	-424.162	860.708	-10.5161		0.1595	-114.412	703.548	0.47021
0.1596	-422.032	866.208	-14.1784		0.1596	-122.342	698.058	2.60651
0.1597	-415.622	872.618	-22.7234		0.1597	-120.512	702.628	-5.32809
0.1598	-411.342	877.798	-15.7044		0.1598	-122.342	708.738	-5.02292
0.1599	-413.182	879.018	-13.5678		0.1599	-127.842	696.828	-3.49704
0.16	-424.162	887.568	-42.5594		0.16	-134.552	698.058	-1.97119
0.1601	-421.722	882.688	-135.027		0.1601	-123.262	702.328	-1.97119
0.1602	-423.552	882.078	-109.087		0.1602	-129.362	701.108	-2.88669
0.1603	-421.422	879.938	91.4126		0.1603	-127.232	708.428	-3.49704
0.1604	-418.672	876.278	106.673		0.1604	-118.992	695.608	1.99611
0.1605	-423.552	882.078	105.453		0.1605	-129.972	702.018	1.69091
0.1606	-406.772	888.788	64.8626		0.1606	-131.502	698.358	-1.05559
0.1607	-406.162	888.178	37.3966		0.1607	-134.252	698.668	-0.75049
0.1608	-421.722	890.318	12.6776		0.1608	-129.972	700.188	2.60651
0.1609	-414.092	891.228	11.4566		0.1609	-127.532	702.328	5.04791
0.161	-405.242	898.858	-4.41257		0.161	-131.192	694.698	6.57361
0.1611	-403.722	900.708	5.65821		0.1611	-121.732	695.608	-7.15919
0.1612	-407.682	902.508	-2.58149		0.1612	-128.142	692.558	7.18461
0.1613	-405.242	913.208	-14.1784		0.1613	-126.012	694.998	4.13231
0.1614	-398.532	919.008	1.99611		0.1614	-128.752	706.288	1.69091
0.1615	-388.762	921.708	0.16511		0.1615	-127.232	688.898	-2.27629
0.1616	-383.572	930.008	-1.36079		0.1616	-133.022	697.138	-4.10739
0.1617	-404.632	934.308	2.60651		0.1617	-128.452	697.138	-2.58149
0.1618	-391.512	930.308	2.30131		0.1618	-123.872	693.478	1.38581
0.1619	-393.952	936.108	-8.37989		0.1619	-122.652	700.188	1.69091
0.162	-397.312	953.208	12.0666		0.162	-137.912	696.528	2.91161
0.1621	-394.872	954.108	3.21681		0.1621	-131.502	701.718	-2.88669
0.1622	-396.392	973.008	2.91161		0.1622	-136.382	707.518	2.60651
0.1623	-411.962	970.008	4.13231		0.1623	-139.432	705.678	-4.41257
0.1624	-414.092	978.808	0.77541		0.1624	-142.492	702.328	1.69091
0.1625	-412.262	987.408	-2.27629		0.1625	-147.372	709.038	-5.32809
0.1626	-408.602	986.708	3.21681		0.1626	-141.872	701.108	3.82721
0.1627	-414.402	990.408	1.69091		0.1627	-138.212	694.998	-1.36079
0.1628	-418.972	987.008	2.30131		0.1628	-145.842	701.718	-1.97119
0.1629	-420.812	995.308	-3.49704		0.1629	-147.982	698.358	-7.15919
0.163	-436.672	1002.01	0.77541		0.163	-142.492	704.458	-2.88669
0.1631	-428.432	1009.01	-1.36079		0.1631	-151.952	708.738	5.35301
0.1632	-429.962	1011.21	3.52201		0.1632	-155.912	706.908	-4.10739
0.1633	-430.572	1017.01	5.65821		0.1633	-158.662	698.968	-3.80221
0.1634	-430.882	1023.11	0.77541		0.1634	-160.192	704.768	3.82721
0.1635	-424.162	1025.81	-1.66599		0.1635	-157.132	707.208	-0.75049
0.1636	-432.102	1027.31	-3.19186		0.1636	-153.172	714.228	-4.41257
0.1637	-426.602	1029.51	0.77541		0.1637	-154.392	714.528	-1.66599
0.1638	-443.082	1045.61	4.74271		0.1638	-152.252	719.108	1.38581
0.1639	-444.612	1038.61	3.82721		0.1639	-162.632	735.898	1.69091
0.164	-444.002	1043.81	3.21681		0.164	-159.272	743.528	3.82721
0.1641	-445.522	1042.01	-1.36079		0.1641	-158.052	754.208	9.01561
0.1642	-432.712	1041.71	3.52201		0.1642	-158.962	756.948	2.91161
0.1643	-440.032	1054.21	9.01561		0.1643	-160.802	760.618	-1.05559
0.1644	-451.022	1059.41	1.69091		0.1644	-171.782	768.548	-7.15919
0.1645	-444.912	1050.21	5.65821		0.1645	-164.152	769.768	2.30131
0.1646	-442.472	1063.61	4.74271		0.1646	-177.892	782.278	1.69091
0.1647	-434.232	1068.21	0.47021		0.1647	-171.782	783.808	-2.58149
0.1648	-435.452	1071.61	-0.44529		0.1648	-194.062	801.508	1.08061
0.1649	-438.812	1078.01	0.77541		0.1649	-191.312	812.498	-1.97119
0.165	-434.232	1078.91	-1.05559		0.165	-201.082	810.358	1.69091
0.1651	-449.492	1084.71	5.65821		0.1651	-198.032	825.918	0.77541
0.1652	-434.542	1086.21	-1.66599		0.1652	-206.272	826.228	3.21681
0.1653	-435.762	1094.51	0.47021		0.1653	-203.222	833.858	1.38581
0.1654	-448.272	1112.81	2.30131		0.1654	-199.552	835.378	0.77541
0.1655	-458.042	1109.11	-2.58149		0.1655	-207.792	837.218	-4.10739
0.1656	-458.342	1115.51	1.99611		0.1656	-201.692	845.448	1.08061
0.1657	-463.532	1112.21	-1.36079		0.1657	-192.842	857.968	-5.02292
0.1658	-465.062	1115.21	-2.88669		0.1658	-203.522	857.048	-4.10739
0.1659	-471.462	1113.71	-5.63329		0.1659	-205.352	864.378	5.35301
0.166	-473.912	1116.41	4.13231		0.166	-218.782	880.858	0.16511
0.1661	-484.892	1118.61	2.30131		0.1661	-213.592	879.018	3.82721
0.1662	-475.432	1107.91	5.35301		0.1662	-213.592	885.738	-6.24359
0.1663	-470.242	1113.71	5.65821		0.1663	-220.612	881.158	10.5406
0.1664	-469.022	1115.81	4.13231		0.1664	-216.342	884.208	-6.54879
0.1665	-462.922	1129.01	-0.75049		0.1665	-215.122	885.428	1.99611
0.1666	-483.672	1127.41	-6.24359		0.1666	-203.832	894.588	-0.44529
0.1667	-487.942	1135.71	-1.05559		0.1667	-201.992	878.408	-2.58149
0.1668	-474.212	1153.11	5.65821		0.1668	-208.402	887.568	1.38581
0.1669	-476.042	1142.71	0.47021		0.1669	-199.552	886.648	-0.75049
0.167	-477.262	1147.01	3.52201		0.167	-201.692	878.108	-1.05559
0.1671	-483.982	1140.91	-2.27629		0.1671	-209.012	890.008	1.99611
0.1672	-483.062	1154.61	1.38581		0.1672	-204.742	890.008	6.26861
0.1673	-482.762	1147.91	2.60651		0.1673	-210.842	894.278	10.8466
0.1674	-493.742	1151.81	-2.58149		0.1674	-220.612	898.558	0.47021
0.1675	-478.482	1146.01	2.91161		0.1675	-201.992	910.108	3.82721
0.1676	-482.152	1148.81	0.16511		0.1676	-205.662	910.108	-0.75049
0.1677	-475.132	1163.11	0.77541		0.1677	-210.232	913.508	0.77541
0.1678	-480.012	1174.11	7.79461		0.1678	-207.492	918.708	1.38581
0.1679	-476.962	1166.81	9.62561		0.1679	-209.622	918.108	-2.88669
0.168	-477.572	1170.21	2.30131		0.168	-207.492	914.708	-1.36079
0.1681	-473.602	1172.31	0.47021		0.1681	-212.072	913.508	-8.37989
0.1682	-471.462	1168.91	4.43751		0.1682	-209.012	918.408	3.82721
0.1683	-475.132	1166.51	1.08061		0.1683	-191.622	913.508	2.60651
0.1684	-459.262	1168.91	5.65821		0.1684	-197.422	915.608	5.35301
0.1685	-463.532	1168.91	-10.5161		0.1685	-192.842	919.908	-4.10739
0.1686	-456.212	1157.61	9.62561		0.1686	-192.532	916.208	5.04791
0.1687	-471.162	1150.91	-10.2109		0.1687	-181.852	923.908	-3.49704
0.1688	-478.792	1143.01	1.99611		0.1688	-179.112	932.408	2.60651
0.1689	-471.462	1149.11	-2.58149		0.1689	-181.852	932.408	-2.27629
0.169	-461.092	1143.01	3.52201		0.169	-180.022	929.108	-1.36079
0.1691	-480.622	1146.01	3.21681		0.1691	-178.192	936.708	-0.14009
0.1692	-474.212	1149.41	-0.14009		0.1692	-179.112	923.308	0.47021
0.1693	-470.552	1147.61	-4.10739		0.1693	-180.942	925.408	1.99611
0.1694	-472.382	1145.11	-0.75049		0.1694	-165.682	919.908	-9.90569
0.1695	-481.232	1141.81	2.60651		0.1695	-174.832	918.108	-1.66599
0.1696	-471.462	1139.01	1.08061		0.1696	-173.922	915.008	5.04791
0.1697	-463.532	1128.31	0.77541		0.1697	-186.432	914.708	0.77541
0.1698	-475.132	1121.01	1.38581		0.1698	-180.632	921.108	-1.05559
0.1699	-461.092	1116.71	2.60651		0.1699	-182.772	919.008	3.21681
0.17	-472.992	1113.41	0.77541		0.17	-176.052	921.108	0.47021
0.1701	-482.152	1114.01	1.69091		0.1701	-177.282	914.108	0.77541
0.1702	-482.762	1102.11	-2.88669		0.1702	-180.332	908.308	3.82721
0.1703	-484.892	1106.41	-1.66599		0.1703	-174.832	915.908	2.30131
0.1704	-486.422	1106.11	12.0666		0.1704	-176.662	928.508	1.38581
0.1705	-484.892	1114.01	4.43751		0.1705	-173.002	937.008	-1.97119
0.1706	-471.772	1117.71	12.9826		0.1706	-170.872	945.508	4.13231
0.1707	-480.312	1118.31	1.08061		0.1707	-169.952	965.708	-4.41257
0.1708	-486.112	1120.71	1.38581		0.1708	-173.002	957.408	-0.44529
0.1709	-478.182	1124.41	1.38581		0.1709	-187.652	966.908	0.47021
0.171	-474.522	1114.01	-2.27629		0.171	-169.342	967.508	-3.49704
0.1711	-491.302	1123.51	3.52201		0.1711	-177.582	980.308	-2.27629
0.1712	-494.962	1129.31	5.35301		0.1712	-175.142	977.608	0.16511
0.1713	-489.472	1122.81	4.43751		0.1713	-173.312	969.008	-0.14009
0.1714	-476.962	1132.91	3.82721		0.1714	-176.052	967.508	1.38581
0.1715	-468.112	1131.11	0.47021		0.1715	-186.132	978.808	-1.36079
0.1716	-472.072	1138.71	-0.44529		0.1716	-181.242	980.308	0.77541
0.1717	-473.602	1147.31	2.30131		0.1717	-187.652	981.608	-1.36079
0.1718	-465.972	1142.11	-3.80221		0.1718	-189.482	975.408	-1.36079
0.1719	-464.752	1144.51	1.99611		0.1719	-197.112	982.808	-5.93849
0.172	-460.172	1135.71	-2.58149		0.172	-185.512	977.008	-0.14009
0.1721	-451.632	1136.31	-2.58149		0.1721	-184.902	973.308	-1.05559
0.1722	-456.212	1138.71	0.16511		0.1722	-181.852	968.108	-2.58149
0.1723	-458.952	1133.51	-1.66599		0.1723	-183.382	966.908	-2.27629
0.1724	-477.872	1134.81	-1.66599		0.1724	-169.342	964.208	-5.93849
0.1725	-476.962	1136.61	-3.80221		0.1725	-183.072	969.708	3.21681
0.1726	-472.382	1135.71	-1.05559		0.1726	-180.632	963.208	-4.41257
0.1727	-468.412	1142.41	-1.66599		0.1727	-188.572	968.708	8.40461
0.1728	-475.742	1139.01	1.69091		0.1728	-188.572	975.108	-1.66599
0.1729	-477.262	1138.71	6.87861		0.1729	-187.352	971.808	2.30131
0.173	-469.942	1145.71	7.79461		0.173	-192.232	974.508	0.77541
0.1731	-453.462	1143.61	-4.10739		0.1731	-202.912	969.708	-0.14009
0.1732	-466.892	1147.31	6.87861		0.1732	-200.772	975.408	-0.44529
0.1733	-464.142	1145.41	2.91161		0.1733	-202.602	986.108	-0.75049
0.1734	-458.342	1150.61	-0.14009		0.1734	-205.352	989.208	4.74271
0.1735	-457.122	1138.71	-1.66599		0.1735	-204.132	995.008	2.91161
0.1736	-454.072	1152.51	-2.58149		0.1736	-194.982	989.508	1.38581
0.1737	-442.172	1141.21	-0.44529		0.1737	-210.542	1002.01	7.18461
0.1738	-438.812	1143.01	-2.58149		0.1738	-201.992	1001.11	0.47021
0.1739	-443.692	1142.71	4.13231		0.1739	-211.762	998.308	3.82721
0.174	-449.492	1143.61	0.16511		0.174	-216.032	1000.81	5.04791
0.1741	-428.432	1141.51	-3.19186		0.1741	-215.732	1008.11	-5.02292
0.1742	-434.842	1143.91	2.60651		0.1742	-211.762	1003.21	0.77541
0.1743	-437.592	1149.41	-0.14009		0.1743	-210.232	1011.51	5.04791
0.1744	-428.432	1162.51	2.91161		0.1744	-214.512	999.608	9.32061
0.1745	-434.542	1160.71	5.35301		0.1745	-205.352	981.908	6.57361
0.1746	-444.302	1163.41	0.77541		0.1746	-207.492	994.708	-2.27629
0.1747	-434.542	1170.21	-0.44529		0.1747	-206.272	991.308	-5.63329
0.1748	-433.932	1158.91	5.65821		0.1748	-208.102	985.808	-1.66599
0.1749	-439.732	1158.61	-1.97119		0.1749	-208.102	992.808	-0.44529
0.175	-439.422	1151.21	0.16511		0.175	-206.572	980.608	2.91161
0.1751	-432.712	1146.31	6.87861		0.1751	-214.812	982.508	8.40461
0.1752	-433.012	1152.81	1.69091		0.1752	-210.542	988.908	4.74271
0.1753	-430.882	1154.61	8.09961		0.1753	-208.102	988.908	7.18461
0.1754	-423.862	1150.61	3.82721		0.1754	-216.642	995.908	5.04791
0.1755	-436.982	1148.21	-1.36079		0.1755	-219.392	1002.91	-2.27629
0.1756	-440.952	1142.71	4.43751		0.1756	-220.612	993.208	5.04791
0.1757	-447.052	1141.21	5.65821		0.1757	-212.682	999.308	4.13231
0.1758	-453.762	1143.31	3.52201		0.1758	-202.302	999.908	0.16511
0.1759	-447.052	1143.61	2.91161		0.1759	-200.772	988.008	4.43751
0.176	-453.762	1139.31	11.1516		0.176	-206.272	995.908	6.26861
0.1761	-463.222	1144.51	1.08061		0.1761	-210.842	987.408	-0.44529
0.1762	-466.582	1145.71	-0.14009		0.1762	-209.322	998.308	-0.14009
0.1763	-467.802	1148.21	0.77541		0.1763	-216.952	997.408	0.77541
0.1764	-464.752	1155.21	-2.58149		0.1764	-220.302	998.608	2.30131
0.1765	-467.502	1151.21	5.35301		0.1765	-220.612	998.608	3.82721
0.1766	-470.552	1151.21	4.74271		0.1766	-214.812	1008.41	9.32061
0.1767	-469.942	1165.61	0.47021		0.1767	-205.052	1005.71	-3.19186
0.1768	-464.752	1172.61	-3.49704		0.1768	-209.012	1012.41	-4.10739
0.1769	-470.242	1194.01	-1.05559		0.1769	-212.982	1009.91	5.65821
0.177	-470.852	1199.11	6.87861		0.177	-202.302	1018.81	1.69091
0.1771	-457.122	1207.41	-4.41257		0.1771	-200.162	1017.61	3.82721
0.1772	-460.782	1214.41	5.35301		0.1772	-214.812	1023.71	3.82721
0.1773	-465.672	1207.41	0.16511		0.1773	-202.302	1022.41	-2.58149
0.1774	-460.782	1198.51	4.74271		0.1774	-211.762	1016.61	3.21681
0.1775	-450.712	1197.31	4.13231		0.1775	-208.712	1020.61	6.87861
0.1776	-449.192	1197.91	5.35301		0.1776	-205.352	1020.01	0.47021
0.1777	-449.802	1187.51	-0.14009		0.1777	-208.712	1013.91	10.8466
0.1778	-453.462	1193.01	1.08061		0.1778	-207.182	1000.21	0.16511
0.1779	-454.072	1199.41	4.74271		0.1779	-195.282	1003.51	4.13231
0.178	-455.902	1191.81	6.26861		0.178	-205.352	1001.11	1.38581
0.1781	-461.702	1202.81	-2.27629		0.1781	-205.662	993.808	-0.75049
0.1782	-462.922	1207.11	3.21681		0.1782	-210.542	1014.51	0.16511
0.1783	-452.242	1202.21	9.32061		0.1783	-215.122	1008.11	0.16511
0.1784	-443.692	1203.41	6.57361		0.1784	-200.472	1009.31	-1.05559
0.1785	-445.832	1218.11	0.16511		0.1785	-212.682	1006.31	-1.97119
0.1786	-451.322	1212.91	2.30131		0.1786	-218.172	1021.51	-2.88669
0.1787	-447.052	1224.51	-2.88669		0.1787	-219.392	1023.41	-2.58149
0.1788	-449.802	1237.61	3.21681		0.1788	-232.822	1020.31	4.13231
0.1789	-449.802	1228.71	1.69091		0.1789	-224.582	1013.91	6.57361
0.179	-448.882	1220.81	1.38581		0.179	-222.752	1016.01	-4.10739
0.1791	-450.712	1224.21	8.09961		0.1791	-218.172	1007.81	-1.36079
0.1792	-466.282	1228.71	-2.27629		0.1792	-229.462	1002.91	-1.66599
0.1793	-471.162	1220.51	3.21681		0.1793	-226.412	1011.21	1.38581
0.1794	-469.022	1223.31	4.43751		0.1794	-227.932	1017.01	3.21681
0.1795	-472.992	1214.11	-4.10739		0.1795	-221.832	1009.61	0.47021
0.1796	-476.352	1228.11	-4.10739		0.1796	-216.342	1016.61	-3.19186
0.1797	-467.802	1232.71	6.57361		0.1797	-210.542	1026.11	-6.24359
0.1798	-458.042	1229.41	-3.80221		0.1798	-221.222	1020.01	11.4566
0.1799	-450.712	1242.81	-10.2109		0.1799	-219.082	1022.81	-1.36079
0.18	-456.512	1253.51	4.74271		0.18	-210.842	1030.41	5.65821
0.1801	-453.152	1241.91	1.99611		0.1801	-217.562	1024.91	1.38581
0.1802	-458.042	1251.31	4.13231		0.1802	-220.612	1022.81	-1.97119
0.1803	-483.672	1257.11	4.43751		0.1803	-206.272	1016.61	-1.05559
0.1804	-473.912	1261.11	-5.32809		0.1804	-216.342	1015.41	4.13231
0.1805	-467.802	1255.01	-1.36079		0.1805	-218.172	1020.91	9.62561
0.1806	-471.772	1256.81	2.91161		0.1806	-222.142	1017.01	0.16511
0.1807	-472.992	1256.51	0.16511		0.1807	-222.442	1013.61	-1.66599
0.1808	-471.772	1271.21	1.99611		0.1808	-228.542	1008.71	4.43751
0.1809	-478.482	1251.61	9.01561		0.1809	-224.272	1015.41	-5.93849
0.181	-475.132	1249.51	-0.44529		0.181	-224.582	1014.21	-5.93849
0.1811	-471.162	1261.41	3.52201		0.1811	-227.322	1017.91	-0.75049
0.1812	-484.592	1251.61	-1.05559		0.1812	-233.432	1020.01	4.13231
0.1813	-477.572	1250.71	4.74271		0.1813	-240.452	1016.31	-0.75049
0.1814	-485.812	1257.41	9.32061		0.1814	-241.972	1020.31	6.87861
0.1815	-485.502	1247.41	2.60651		0.1815	-236.782	1021.51	-0.75049
0.1816	-488.862	1242.51	6.26861		0.1816	-237.702	1009.91	0.47021
0.1817	-483.982	1255.01	-1.05559		0.1817	-235.562	1014.81	1.08061
0.1818	-472.992	1252.21	-4.10739		0.1818	-239.532	1013.91	-1.66599
0.1819	-478.182	1250.71	1.99611		0.1819	-232.822	1019.41	-4.41257
0.182	-478.482	1241.91	2.91161		0.182	-242.892	1011.81	3.82721
0.1821	-474.522	1243.11	-0.44529		0.1821	-242.282	1018.21	-2.27629
0.1822	-473.602	1256.21	-1.36079		0.1822	-232.212	1013.61	-1.05559
0.1823	-490.082	1259.91	2.30131		0.1823	-241.362	1015.11	-1.36079
0.1824	-480.312	1266.91	-0.75049		0.1824	-238.012	1014.81	1.99611
0.1825	-478.792	1259.31	10.2356		0.1825	-236.782	1015.41	-9.90569
0.1826	-468.722	1250.71	-0.75049		0.1826	-242.892	1013.61	1.08061
0.1827	-472.382	1256.81	2.60651		0.1827	-241.672	1020.91	-0.14009
0.1828	-470.552	1255.01	-0.44529		0.1828	-226.712	1008.71	3.52201
0.1829	-474.522	1258.01	5.04791		0.1829	-231.902	1004.11	3.82721
0.183	-487.642	1254.71	1.69091		0.183	-226.712	1018.81	-3.49704
0.1831	-491.302	1248.61	6.87861		0.1831	-218.782	1017.01	-10.8213
0.1832	-491.612	1259.31	-1.66599		0.1832	-233.122	1015.71	4.13231
0.1833	-490.692	1246.11	-8.07469		0.1833	-244.412	1009.91	2.30131
0.1834	-490.082	1240.31	4.13231		0.1834	-231.292	1026.71	-2.27629
0.1835	-486.722	1230.91	2.91161		0.1835	-232.212	1022.11	-4.41257
0.1836	-479.702	1231.51	6.57361		0.1836	-240.752	1024.91	6.26861
0.1837	-474.212	1234.81	6.87861		0.1837	-242.282	1027.01	-1.36079
0.1838	-478.792	1230.01	-4.71774		0.1838	-240.142	1019.41	-0.75049
0.1839	-468.722	1225.11	5.04791		0.1839	-243.192	1021.51	-3.49704
0.184	-467.502	1225.71	0.16511		0.184	-238.012	1019.41	-2.58149
0.1841	-474.212	1225.71	-0.44529		0.1841	-231.902	1014.21	1.99611
0.1842	-483.982	1214.11	-1.36079		0.1842	-238.622	1014.21	2.30131
0.1843	-469.632	1224.81	-2.88669		0.1843	-236.782	1015.11	-3.80221
0.1844	-479.092	1226.61	2.60651		0.1844	-228.852	1034.31	-3.19186
0.1845	-473.302	1231.81	-0.14009		0.1845	-226.412	1027.01	-1.05559
0.1846	-479.702	1224.81	4.43751		0.1846	-230.072	1043.51	3.21681
0.1847	-481.842	1215.61	5.65821		0.1847	-234.652	1048.71	-5.32809
0.1848	-478.482	1221.41	0.16511		0.1848	-233.122	1058.21	6.57361
0.1849	-481.232	1219.01	5.65821		0.1849	-230.682	1070.71	-10.5161
0.185	-481.542	1211.01	0.47021		0.185	-221.832	1076.21	1.99611
0.1851	-489.162	1202.51	1.99611		0.1851	-230.682	1064.61	-1.97119
0.1852	-483.672	1205.61	4.13231		0.1852	-229.772	1063.61	13.8976
0.1853	-477.572	1199.11	10.5406		0.1853	-235.562	1065.81	2.30131
0.1854	-483.062	1196.11	4.74271		0.1854	-220.922	1078.31	-3.19186
0.1855	-475.432	1196.71	1.69091		0.1855	-235.262	1075.21	5.04791
0.1856	-491.612	1195.81	5.96361		0.1856	-234.652	1075.51	-1.05559
0.1857	-492.832	1198.51	5.04791		0.1857	-233.432	1079.51	-0.14009
0.1858	-482.452	1191.51	-1.36079		0.1858	-238.622	1083.21	4.13231
0.1859	-477.572	1187.51	0.47021		0.1859	-233.732	1086.21	-7.15919
0.186	-482.762	1197.01	0.47021		0.186	-238.622	1103.01	7.18461
0.1861	-494.352	1187.21	5.04791		0.1861	-239.842	1115.81	2.60651
0.1862	-484.892	1184.21	0.47021		0.1862	-230.072	1121.91	-4.10739
0.1863	-479.402	1187.21	-5.02292		0.1863	-237.392	1148.51	1.99611
0.1864	-489.162	1175.31	-2.27629		0.1864	-234.652	1145.71	0.47021
0.1865	-478.182	1167.41	0.77541		0.1865	-238.622	1157.91	1.69091
0.1866	-480.922	1172.61	4.43751		0.1866	-230.992	1157.91	0.16511
0.1867	-476.962	1175.61	4.13231		0.1867	-228.852	1163.41	-0.44529
0.1868	-481.542	1179.31	-3.80221		0.1868	-222.142	1185.11	11.4566
0.1869	-469.942	1181.41	4.74271		0.1869	-223.362	1172.31	-0.14009
0.187	-459.872	1167.71	2.60651		0.187	-223.052	1180.21	0.77541
0.1871	-456.512	1167.71	-7.46429		0.1871	-223.362	1185.71	-4.10739
0.1872	-457.732	1165.31	-2.58149		0.1872	-220.002	1186.61	5.35301
0.1873	-454.992	1171.11	-1.36079		0.1873	-223.662	1198.21	-4.71774
0.1874	-451.022	1171.71	0.77541		0.1874	-233.432	1193.31	-4.10739
0.1875	-449.492	1164.01	0.77541		0.1875	-247.162	1205.61	0.77541
0.1876	-437.902	1186.61	1.69091		0.1876	-228.852	1197.01	0.77541
0.1877	-444.002	1183.91	-1.66599		0.1877	-237.392	1212.61	2.91161
0.1878	-445.222	1196.41	-2.27629		0.1878	-236.172	1207.41	7.18461
0.1879	-448.272	1193.31	-1.36079		0.1879	-242.282	1213.51	7.79461
0.188	-433.622	1207.41	1.69091		0.188	-236.172	1213.81	5.65821
0.1881	-432.402	1206.81	-5.02292		0.1881	-241.062	1207.11	2.60651
0.1882	-435.762	1217.11	-1.97119		0.1882	-236.482	1204.31	-1.97119
0.1883	-436.372	1236.71	-1.66599		0.1883	-233.432	1209.81	1.08061
0.1884	-431.182	1227.21	5.04791		0.1884	-235.262	1203.71	3.82721
0.1885	-434.232	1237.91	-1.36079		0.1885	-244.412	1219.31	-0.44529
0.1886	-436.062	1248.01	-1.36079		0.1886	-239.532	1217.11	-6.85399
0.1887	-435.762	1266.61	-1.97119		0.1887	-249.302	1214.41	-0.44529
0.1888	-440.342	1275.71	-0.44529		0.1888	-243.502	1215.01	-1.05559
0.1889	-427.522	1286.71	-4.10739		0.1889	-248.992	1212.61	-5.32809
0.189	-443.392	1286.11	3.21681		0.189	-239.842	1204.61	-5.63329
0.1891	-436.672	1295.31	-1.36079		0.1891	-242.892	1199.41	-8.37989
0.1892	-447.662	1292.81	0.47021		0.1892	-239.842	1207.41	-7.15919
0.1893	-457.432	1293.41	2.60651		0.1893	-240.142	1193.31	0.77541
0.1894	-459.562	1299.51	-0.44529		0.1894	-249.602	1194.61	7.18461
0.1895	-453.762	1302.31	-3.80221		0.1895	-252.652	1191.51	1.08061
0.1896	-445.522	1291.91	-2.27629		0.1896	-256.012	1185.41	4.13231
0.1897	-459.872	1295.01	2.30131		0.1897	-256.932	1181.41	-0.75049
0.1898	-460.172	1295.61	1.69091		0.1898	-251.742	1183.91	2.60651
0.1899	-457.732	1289.21	2.30131		0.1899	-248.082	1174.11	5.35301
0.19	-466.282	1297.41	2.30131		0.19	-249.602	1176.01	-0.14009
0.1901	-461.392	1297.41	1.99611		0.1901	-262.422	1174.41	-2.88669
0.1902	-448.272	1299.21	5.65821		0.1902	-243.502	1182.11	2.91161
0.1903	-458.342	1291.01	0.47021		0.1903	-248.382	1181.41	2.91161
0.1904	-461.392	1293.71	-1.36079		0.1904	-254.182	1178.11	4.13231
0.1905	-474.822	1286.11	7.18461		0.1905	-244.112	1172.31	0.16511
0.1906	-481.542	1288.31	-1.05559		0.1906	-252.042	1181.41	-1.97119
0.1907	-465.972	1281.81	3.82721		0.1907	-261.202	1175.61	2.60651
0.1908	-477.262	1277.31	0.47021		0.1908	-261.502	1184.51	-2.58149
0.1909	-480.622	1284.61	9.62561		0.1909	-256.012	1181.71	4.13231
0.191	-489.472	1293.11	2.30131		0.191	-250.522	1174.41	-0.75049
0.1911	-483.062	1289.81	1.69091		0.1911	-250.822	1176.61	2.30131
0.1912	-488.552	1287.31	7.48961		0.1912	-248.692	1174.71	-4.10739
0.1913	-482.152	1287.61	-0.75049		0.1913	-247.772	1168.01	1.08061
0.1914	-468.412	1296.51	-2.88669		0.1914	-261.502	1176.31	0.77541
0.1915	-470.242	1298.31	8.70961		0.1915	-248.382	1176.91	-13.5678
0.1916	-472.382	1293.41	4.13231		0.1916	-250.822	1188.81	0.16511
0.1917	-470.552	1296.51	6.87861		0.1917	-246.242	1183.91	2.91161
0.1918	-466.582	1314.81	2.91161		0.1918	-248.992	1171.41	-1.66599
0.1919	-468.412	1309.31	4.43751		0.1919	-250.212	1172.61	-3.19186
0.192	-463.842	1298.91	0.16511		0.192	-247.162	1183.91	-2.58149
0.1921	-460.172	1298.31	4.13231		0.1921	-249.602	1184.81	7.18461
0.1922	-467.192	1304.41	5.35301		0.1922	-241.972	1190.61	-0.44529
0.1923	-461.092	1301.41	5.35301		0.1923	-233.732	1202.51	2.30131
0.1924	-452.852	1295.61	-5.32809		0.1924	-234.652	1208.91	4.13231
0.1925	-465.972	1296.21	-0.75049		0.1925	-244.722	1214.41	-4.10739
0.1926	-472.382	1292.51	-2.88669		0.1926	-238.012	1219.31	2.30131
0.1927	-475.432	1294.41	2.60651		0.1927	-240.142	1226.01	3.52201
0.1928	-468.112	1289.81	4.43751		0.1928	-236.172	1217.81	0.77541
0.1929	-470.552	1294.71	-0.14009		0.1929	-242.892	1224.81	-4.10739
0.193	-467.802	1299.91	3.21681		0.193	-242.582	1221.11	-1.97119
0.1931	-468.412	1297.41	6.26861		0.1931	-238.622	1220.81	12.0666
0.1932	-476.352	1290.11	-4.10739		0.1932	-234.952	1208.91	1.99611
0.1933	-460.482	1300.51	-1.36079		0.1933	-242.892	1218.71	-0.14009
0.1934	-471.462	1309.91	-2.58149		0.1934	-237.092	1217.11	2.30131
0.1935	-467.802	1310.21	10.2356		0.1935	-244.112	1210.11	3.21681
0.1936	-474.212	1315.41	1.08061		0.1936	-248.082	1215.91	-4.10739
0.1937	-476.352	1317.21	9.62561		0.1937	-244.722	1198.81	0.16511
0.1938	-470.242	1328.21	2.91161		0.1938	-247.772	1210.41	1.69091
0.1939	-467.802	1327.91	-0.44529		0.1939	-251.432	1203.11	4.43751
0.194	-466.892	1322.71	-2.88669		0.194	-248.082	1206.21	2.30131
0.1941	-468.112	1320.01	3.52201		0.1941	-247.162	1215.91	-3.19186
0.1942	-470.852	1327.91	4.74271		0.1942	-251.432	1219.91	7.48961
0.1943	-470.852	1328.21	1.38581		0.1943	-252.042	1230.61	-4.71774
0.1944	-483.672	1328.21	4.74271		0.1944	-257.232	1224.81	9.93061
0.1945	-484.592	1326.41	2.30131		0.1945	-253.262	1226.91	6.87861
0.1946	-483.062	1339.21	-3.19186		0.1946	-252.352	1216.51	-0.44529
0.1947	-476.042	1336.51	2.30131		0.1947	-244.112	1223.31	4.43751
0.1948	-486.112	1330.41	-0.75049		0.1948	-249.302	1215.01	3.82721
0.1949	-494.962	1330.71	1.38581		0.1949	-248.692	1213.21	1.99611
0.195	-480.622	1329.81	1.38581		0.195	-248.692	1214.41	-1.05559
0.1951	-489.782	1316.91	-3.49704		0.1951	-243.192	1214.11	3.21681
0.1952	-487.642	1320.61	3.82721		0.1952	-242.282	1205.61	1.99611
0.1953	-489.162	1323.71	2.60651		0.1953	-261.202	1213.51	8.40461
0.1954	-488.862	1324.31	-0.14009		0.1954	-256.932	1212.61	1.99611
0.1955	-471.772	1324.61	2.91161		0.1955	-253.872	1219.31	4.13231
0.1956	-479.402	1323.01	7.18461		0.1956	-261.202	1215.31	-4.41257
0.1957	-483.982	1315.41	3.82721		0.1957	-256.932	1220.81	-2.58149
0.1958	-478.182	1315.71	4.13231		0.1958	-252.652	1211.41	2.91161
0.1959	-473.302	1319.11	-2.88669		0.1959	-254.482	1215.91	6.87861
0.196	-471.162	1331.91	0.77541		0.196	-267.002	1219.61	-1.05559
0.1961	-486.422	1325.51	-0.44529		0.1961	-274.932	1227.81	2.30131
0.1962	-477.572	1334.61	3.21681		0.1962	-270.052	1224.21	3.21681
0.1963	-475.132	1339.81	5.04791		0.1963	-263.332	1213.81	0.16511
0.1964	-471.162	1332.51	7.79461		0.1964	-270.962	1215.01	5.04791
0.1965	-466.582	1346.21	3.52201		0.1965	-264.562	1221.11	0.16511
0.1966	-465.972	1345.91	0.77541		0.1966	-256.012	1224.51	4.43751
0.1967	-468.412	1351.11	-2.88669		0.1967	-267.302	1237.91	4.13231
0.1968	-468.112	1336.81	7.18461		0.1968	-259.982	1227.81	4.13231
0.1969	-461.392	1337.11	-9.60059		0.1969	-259.062	1225.71	3.52201
0.197	-474.522	1343.51	4.43751		0.197	-257.232	1234.51	3.82721
0.1971	-470.552	1345.01	2.30131		0.1971	-258.762	1248.31	6.87861
0.1972	-472.382	1342.91	1.38581		0.1972	-252.652	1268.41	3.82721
0.1973	-466.892	1339.51	4.13231		0.1973	-242.892	1269.61	-1.36079
0.1974	-456.212	1336.51	4.43751		0.1974	-248.382	1264.81	6.26861
0.1975	-465.672	1332.21	-2.88669		0.1975	-244.722	1275.11	2.30131
0.1976	-456.512	1325.21	-0.14009		0.1976	-247.772	1281.81	0.16511
0.1977	-459.562	1324.01	4.74271		0.1977	-252.962	1280.31	-4.41257
0.1978	-455.602	1327.61	-1.05559		0.1978	-259.672	1274.51	3.21681
0.1979	-459.872	1337.11	3.21681		0.1979	-257.542	1288.91	-5.02292
0.198	-454.072	1342.01	-3.49704		0.198	-256.012	1291.01	1.69091
0.1981	-449.192	1334.61	5.96361		0.1981	-253.262	1288.91	1.69091
0.1982	-453.762	1329.11	9.01561		0.1982	-254.182	1288.61	1.69091
0.1983	-453.152	1335.31	-1.05559		0.1983	-258.452	1292.51	4.43751
0.1984	-448.882	1330.41	1.69091		0.1984	-263.642	1285.21	3.82721
0.1985	-459.872	1337.41	-8.68499		0.1985	-263.032	1288.91	-3.80221
0.1986	-453.762	1347.81	3.21681		0.1986	-265.172	1286.71	1.99611
0.1987	-457.732	1344.41	-2.88669		0.1987	-272.182	1285.51	2.30131
0.1988	-458.042	1343.21	-0.75049		0.1988	-274.022	1288.91	-1.36079
0.1989	-458.342	1357.21	-3.19186		0.1989	-259.062	1280.01	1.99611
0.199	-450.712	1354.81	-2.88669		0.199	-271.882	1275.11	5.04791
0.1991	-436.672	1363.31	-0.75049		0.1991	-263.942	1279.41	4.13231
0.1992	-439.422	1368.21	14.8136		0.1992	-261.202	1276.71	3.52201
0.1993	-433.012	1364.21	3.21681		0.1993	-272.182	1271.51	1.38581
0.1994	-452.242	1355.41	4.74271		0.1994	-275.542	1274.51	2.60651
0.1995	-445.832	1357.81	3.21681		0.1995	-263.642	1275.41	-1.66599
0.1996	-452.242	1347.51	4.74271		0.1996	-263.032	1261.71	7.18461
0.1997	-457.732	1342.01	2.60651		0.1997	-276.762	1268.41	5.04791
[truncated: 3,002 more rows]

## Sheet: Fig 4B
	Fig 4B
	Direction	Spiking	E-I offset
	0	291.696	38.5
	45	116.969	4.5
	90	41.9047	4.8
	135	31.9653	0
	180	31.9653	0
	225	58.0786	3.3
	270	134.531	9.1
	315	233.581	50.2
	vector sum - angle	336.334	332.151
	vector sum - DSI	0.514828	0.800691

## Sheet: Fig 4C,D
	Fig 4C			Fig 4D
	Spiking-DSI	Offset-DSI		Spiking-direction	Offset-direction
	0.514828	0.764247		336.334	332.151
	0.45928	0.599559		237.647	225.245
	0.680187	0.658528		251.755	237.273
	0.600372	0.725886		328.772	311.551
	0.205913	0.439871		269.94	288.985
	0.21247	0.277439		173.085	160.22
	0.452907	0.632366		202.736	207.706

## Sheet: fig 4E
	Fig 4E (left)						Fig 4E (right)
	time (s)	EPSC (pA)	IPSC (pA)	Spiking			time (s)	EPSC (pA)	IPSC (pA)	Spiking
	0	6.3602	1.9315	7.2185			0	6.0554	15.57	1.6631
	0.0001	6.3024	2.0658	5.1768			0.0001	6.3603	15.475	5.6876
	0.0002	6.5493	2.2789	-0.040055			0.0002	6.5115	15.193	2.8208
	0.0003	6.8266	2.0927	-3.291			0.0003	6.3117	15.483	0.8906
	0.0004	6.763	1.9216	-5.357			0.0004	6.0336	15.593	3.8397
	0.0005	6.7162	2.0811	-3.3108			0.0005	6.1212	15.434	3.415
	0.0006	6.8909	2.2583	0.49824			0.0006	6.2709	15.444	-0.42039
	0.0007	6.8192	2.3452	-1.8776			0.0007	6.2577	15.332	-4.8332
	0.0008	7.0778	2.3713	-7.3613			0.0008	6.6494	15.379	-6.0191
	0.0009	7.5352	2.3601	-6.1976			0.0009	6.6124	15.369	-1.98
	0.001	7.2254	2.2969	0.10345			0.001	6.6192	15.414	0.46276
	0.0011	7.559	2.1552	2.9683			0.0011	6.7529	15.457	0.69842
	0.0012	8.2545	2.0322	2.161			0.0012	6.6084	15.23	2.4818
	0.0013	8.2545	2.194	0.15153			0.0013	6.7532	15.168	3.7785
	0.0014	8.097	2.3261	-0.38688			0.0014	6.7015	15.268	2.4635
	0.0015	8.1879	2.2965	1.32			0.0015	6.7409	15.285	1.8026
	0.0016	8.8926	2.2167	4.0423			0.0016	6.927	15.172	1.1756
	0.0017	9.5895	2.0173	3.8547			0.0017	6.9193	15.043	-1.9967
	0.0018	9.6965	2.1915	2.2789			0.0018	6.847	15.04	-0.56797
	0.0019	9.4587	2.4609	-0.70623			0.0019	6.8704	14.999	3.7777
	0.002	9.3531	2.2758	-0.94733			0.002	7.0508	14.977	3.6073
	0.0021	9.4483	2.1451	0.19853			0.0021	6.9466	15.004	-0.51568
	0.0022	9.5865	2.3806	0.64525			0.0022	6.8509	14.8	-3.8991
	0.0023	9.729	2.6411	3.992			0.0023	6.8896	14.814	-3.451
	0.0024	9.8524	2.5848	5.3634			0.0024	6.8711	14.701	-5.0161
	0.0025	10.138	2.5877	-0.8345			0.0025	6.8564	14.548	-7.1803
	0.0026	10.013	2.8456	-4.6887			0.0026	6.8495	14.551	-4.7593
	0.0027	9.6346	3.0864	0.13098			0.0027	6.6635	14.448	-1.0073
	0.0028	9.3224	3.2091	1.6295			0.0028	6.564	14.37	1.0631
	0.0029	9.3193	3.1	-2.3924			0.0029	6.744	14.125	3.899
	0.003	9.3902	3.0409	-1.9769			0.003	6.7386	14.103	7.0329
	0.0031	9.0529	3.4684	0.30463			0.0031	6.5877	14.206	6.9894
	0.0032	9.0996	3.6956	2.2639			0.0032	6.2543	13.918	2.4333
	0.0033	9.186	3.6296	2.5423			0.0033	6.2527	13.641	-3.3209
	0.0034	8.7019	3.8619	-0.8696			0.0034	6.7683	13.768	-5.6974
	0.0035	8.528	4.0901	-1.5659			0.0035	6.9268	13.694	-5.9572
	0.0036	8.7329	4.1043	0.91022			0.0036	6.8536	13.404	-2.3125
	0.0037	8.2792	4.0684	-0.24629			0.0037	6.8946	13.455	3.9853
	0.0038	7.8694	3.9622	-4.3837			0.0038	6.9313	13.702	5.6978
	0.0039	7.9524	4.2076	-6.5061			0.0039	7.0274	13.59	4.277
	0.004	8.0654	4.7105	-2.8882			0.004	7.1548	13.317	4.5406
	0.0041	7.8188	4.8531	2.036			0.0041	7.2898	13.54	0.79861
	0.0042	7.7485	4.666	4.3992			0.0042	7.447	13.741	-4.1556
	0.0043	7.7381	4.5689	3.0657			0.0043	7.6898	13.711	-5.5173
	0.0044	7.5482	4.8213	-2.1976			0.0044	7.7689	13.65	-6.1099
	0.0045	7.5149	4.8165	-5.9103			0.0045	7.6427	13.494	-4.2491
	0.0046	7.4611	4.8293	-2.1244			0.0046	8.0607	13.475	0.203
	0.0047	7.5087	5.0193	3.2561			0.0047	8.1913	13.66	4.2642
	0.0048	7.5953	5.0407	3.3652			0.0048	7.9637	13.952	4.9245
	0.0049	7.549	5.0713	3.2033			0.0049	8.5268	14.004	5.2511
	0.005	7.5791	5.0257	4.5927			0.005	8.5428	13.776	3.8179
	0.0051	7.4248	5.0556	5.9372			0.0051	8.511	13.788	2.9654
	0.0052	7.245	5.1545	5.3447			0.0052	8.686	14.049	5.0734
	0.0053	7.3828	5.0974	0.66936			0.0053	8.6673	14.14	2.556
	0.0054	7.5513	5.0759	-3.4933			0.0054	8.8056	13.866	-5.7253
	0.0055	7.7244	5.13	-2.1842			0.0055	8.6775	13.837	-7.0317
	0.0056	8.154	5.1831	1.6484			0.0056	8.8099	13.981	-1.0283
	0.0057	8.1335	5.4444	0.9458			0.0057	8.8303	13.968	-1.2345
	0.0058	7.629	5.5452	-2.1242			0.0058	8.5941	14.026	-5.5333
	0.0059	7.6605	5.4176	-3.9527			0.0059	8.486	14.098	-6.4793
	0.006	8.0015	5.4265	-7.4119			0.006	8.4147	13.999	-3.8155
	0.0061	8.3745	5.6989	-7.0255			0.0061	8.4765	13.702	2.3276
	0.0062	8.3226	5.9549	-3.4573			0.0062	8.4008	13.593	6.3045
	0.0063	7.9618	5.7955	-3.0885			0.0063	8.3104	13.622	2.0701
	0.0064	8.1646	5.699	-2.1471			0.0064	8.2317	13.59	0.026873
	0.0065	8.4293	5.9483	-0.083461			0.0065	7.8025	13.351	-0.28445
	0.0066	8.2153	6.3431	2.2833			0.0066	7.9199	13.324	0.5726
	0.0067	8.1472	6.6136	4.6958			0.0067	8.0571	13.334	1.1342
	0.0068	8.164	6.5481	3.8767			0.0068	7.72	13.152	2.2235
	0.0069	8.2901	6.4266	0.48564			0.0069	7.4534	13.101	2.3648
	0.007	8.4901	6.5137	2.1191			0.007	7.0368	12.949	0.91678
	0.0071	8.4928	6.57	5.241			0.0071	7.1128	12.709	-1.3741
	0.0072	8.2857	6.7901	2.6885			0.0072	7.4445	12.606	-2.1709
	0.0073	8.3643	7.1584	-2.8797			0.0073	7.4549	12.594	-1.4811
	0.0074	8.8191	7.2182	-3.8724			0.0074	6.982	12.5	-2.4785
	0.0075	8.7009	7.1081	1.082			0.0075	6.7318	12.468	-0.46634
	0.0076	8.4634	7.2192	3.2686			0.0076	6.9259	12.314	4.3709
	0.0077	8.61	7.3522	-1.2161			0.0077	7.0015	12.136	3.8711
	0.0078	8.6385	7.209	-3.5873			0.0078	6.9052	12.287	0.66809
	0.0079	8.7468	7.2097	-0.087171			0.0079	6.7337	12.367	-1.3884
	0.008	8.7811	7.2939	4.364			0.008	6.9588	12.267	-1.4819
	0.0081	8.7125	7.322	3.399			0.0081	7.3761	12.137	-0.97711
	0.0082	8.9041	7.1843	-1.4664			0.0082	7.4918	11.981	-2.0945
	0.0083	8.879	7.1568	-2.4782			0.0083	7.3866	12.163	-4.3995
	0.0084	8.7403	7.2935	-1.8807			0.0084	7.3679	12.392	-2.6297
	0.0085	8.9816	6.9106	-2.6909			0.0085	7.5018	12.178	1.916
	0.0086	9.238	6.7097	-2.8994			0.0086	7.7115	12.17	4.2676
	0.0087	9.1701	6.9587	-3.2175			0.0087	7.9549	12.439	4.3845
	0.0088	9.3197	7.0492	2.3697			0.0088	8.0795	12.353	1.4681
	0.0089	9.3586	6.7318	8.5956			0.0089	8.2782	12.226	-2.7032
	0.009	9.0047	6.3386	5.493			0.009	8.7263	12.53	-2.3152
	0.0091	9.0881	6.4716	-0.73398			0.0091	8.9816	12.715	0.0029943
	0.0092	9.3896	6.3765	-1.1679			0.0092	8.9743	12.554	2.5678
	0.0093	9.553	6.0204	-0.13639			0.0093	8.9399	12.438	3.9257
	0.0094	9.4808	6.0581	-5.1965			0.0094	9.3941	12.594	2.4118
	0.0095	9.1917	6.1101	-8.5706			0.0095	9.8894	12.952	1.5894
	0.0096	9.0972	5.9035	-5.4816			0.0096	9.8968	12.718	-0.23932
	0.0097	9.006	5.7541	-0.73256			0.0097	9.9056	12.414	-2.3489
	0.0098	8.9941	5.5672	3.1397			0.0098	9.8229	12.645	-1.6125
	0.0099	9.2236	5.223	5.886			0.0099	9.7492	12.8	-1.5216
	0.01	8.9797	5.2198	4.6088			0.01	10.167	12.832	-4.7136
	0.0101	8.6367	5.311	-0.01228			0.0101	10.341	12.746	-7.2837
	0.0102	8.7335	4.9976	-4.3357			0.0102	10.37	12.534	-5.4077
	0.0103	8.769	5.0076	-1.1441			0.0103	10.318	12.474	-0.89821
	0.0104	8.5223	5.0767	5.2954			0.0104	10.187	12.618	3.6503
	0.0105	8.3423	4.7899	6.2797			0.0105	10.138	12.477	5.5966
	0.0106	8.3711	4.6316	1.3915			0.0106	10.057	12.207	3.7313
	0.0107	8.5526	4.5251	-0.77026			0.0107	10.427	12.128	-0.62257
	0.0108	8.6379	4.6685	2.0284			0.0108	10.674	11.841	-1.0183
	0.0109	8.4688	4.7251	4.8747			0.0109	10.377	11.838	2.5436
	0.011	8.3662	4.3542	3.4553			0.011	10.028	11.891	5.7355
	0.0111	8.4952	4.1438	-2.3544			0.0111	10.145	11.708	5.2578
	0.0112	8.6638	4.2441	-6.431			0.0112	10.335	11.767	1.0471
	0.0113	8.7681	4.1223	-5.433			0.0113	10.32	11.406	-2.4906
	0.0114	8.8107	4.0087	-4.159			0.0114	9.9787	11.168	1.3498
	0.0115	8.6379	3.9664	-2.1713			0.0115	9.7661	11.235	4.3645
	0.0116	8.6781	3.8284	0.33174			0.0116	9.712	11.044	-0.66418
	0.0117	8.8654	3.7708	1.8736			0.0117	9.4493	10.866	-3.3048
	0.0118	8.4647	3.6659	3.9991			0.0118	9.205	10.848	-2.4928
	0.0119	8.4026	3.7016	6.2071			0.0119	9.3277	10.883	-2.5247
	0.012	9.0402	3.7001	1.3242			0.012	9.4144	10.808	-4.594
	0.0121	9.4159	3.5605	-3.6614			0.0121	9.2891	10.684	-5.4899
	0.0122	9.136	3.4747	-2.9441			0.0122	8.9341	10.386	-4.2029
	0.0123	8.7046	3.5423	-5.1993			0.0123	9.0248	10.263	-5.5896
	0.0124	8.5485	3.4157	-7.4935			0.0124	9.2164	10.381	-6.0502
	0.0125	8.4969	3.3944	-2.3925			0.0125	9.0089	10.299	-2.6782
	0.0126	8.8269	3.4491	4.6743			0.0126	8.9647	10.207	5.3293
	0.0127	9.0462	3.325	6.2956			0.0127	8.7223	10.033	10.791
	0.0128	9.2072	3.466	3.4718			0.0128	8.714	10.109	8.5752
	0.0129	9.109	3.592	-0.67255			0.0129	8.9171	10.134	2.8512
	0.013	8.6913	3.5448	-4.0998			0.013	8.8198	9.9411	-3.0903
	0.0131	8.4684	3.1912	-4.8461			0.0131	8.6432	10.012	-5.9878
	0.0132	8.5489	3.0389	-0.9277			0.0132	8.6432	9.8133	-5.3874
	0.0133	8.7787	3.4733	4.0912			0.0133	8.4989	9.5693	-1.799
	0.0134	8.8074	3.6685	5.5549			0.0134	8.3941	9.5543	3.2406
	0.0135	8.7666	3.7454	2.5934			0.0135	8.5418	9.5	2.9068
	0.0136	8.7665	3.9298	-0.79999			0.0136	8.3399	9.3877	2.0889
	0.0137	8.8317	3.7424	-0.73896			0.0137	8.1213	9.2666	5.278
	0.0138	8.6727	3.8879	-4.3413			0.0138	8.5014	9.1241	1.0908
	0.0139	8.462	4.4346	-6.8012			0.0139	8.2766	8.9588	-5.911
	0.014	8.5048	4.4143	-3.4815			0.014	7.7688	8.7906	-6.0198
	0.0141	9.0704	4.2594	1.9492			0.0141	8.5099	8.7202	-5.3776
	0.0142	8.9175	4.4623	7.4807			0.0142	8.948	8.7595	-3.33
	0.0143	8.4808	4.6346	9.5681			0.0143	8.4141	8.6175	2.6416
	0.0144	8.6977	4.7193	4.0778			0.0144	8.212	8.3267	9.1926
	0.0145	8.9039	4.7936	-7.19			0.0145	7.8972	8.0579	9.111
	0.0146	9.0992	4.8245	-9.7172			0.0146	8.1325	7.9166	5.703
	0.0147	9.0902	4.8029	-2.9208			0.0147	8.3636	7.966	4.6719
	0.0148	9.1119	4.9703	5.0837			0.0148	8.1771	7.6469	1.4914
	0.0149	9.1207	4.9615	9.9022			0.0149	8.1858	7.1972	-4.3064
	0.015	9.015	4.8934	6.0381			0.015	8.1711	7.1004	-7.5973
	0.0151	8.9828	4.9471	-0.68481			0.0151	8.0532	7.2881	-2.9768
	0.0152	9.0288	4.7732	-3.078			0.0152	7.6274	7.2716	-0.66242
	0.0153	9.1513	4.5686	-1.2925			0.0153	7.5806	6.8377	-3.9405
	0.0154	9.3252	4.7764	1.5548			0.0154	7.8526	6.5733	-1.9238
	0.0155	9.0276	5.2828	-2.0854			0.0155	7.8998	6.7968	4.2457
	0.0156	8.6563	5.0996	-4.472			0.0156	7.7031	6.7388	3.4107
	0.0157	8.588	4.7742	-0.87156			0.0157	7.5977	6.674	0.52526
	0.0158	8.8465	4.5099	-0.33281			0.0158	7.8062	7.0112	2.5684
	0.0159	8.8309	4.1246	-0.52026			0.0159	7.6421	6.8554	3.5018
	0.016	8.397	4.2219	-1.1229			0.016	7.6535	6.8368	0.46983
	0.0161	8.3833	4.2863	-3.5979			0.0161	7.7698	6.7328	-4.0452
	0.0162	8.6247	3.9101	-1.8747			0.0162	7.3897	6.5587	-5.2569
	0.0163	8.4096	3.4666	3.1301			0.0163	7.3742	7.071	0.4361
	0.0164	8.2151	3.501	4.5173			0.0164	7.4473	7.3695	2.8032
	0.0165	7.9523	3.4931	-1.414			0.0165	6.9621	7.2128	0.28765
	0.0166	7.3503	3.1591	-5.708			0.0166	6.9566	7.2759	-3.4267
	0.0167	7.2295	2.9086	-4.9265			0.0167	7.0351	7.5261	-5.2609
	0.0168	7.1417	2.9391	-0.81558			0.0168	6.7271	7.7989	-4.5859
	0.0169	6.8983	2.7993	3.1429			0.0169	6.7292	7.8265	-3.408
	0.017	6.6226	2.4383	0.66623			0.017	6.5588	7.8548	1.4122
	0.0171	6.2204	2.4071	-4.5798			0.0171	6.1174	8.3313	8.4757
	0.0172	5.6057	2.5377	-2.2585			0.0172	6.2424	8.8259	9.1596
	0.0173	5.3628	2.516	6.8643			0.0173	6.5152	9.1463	4.5964
	0.0174	5.2475	2.291	10.419			0.0174	6.3379	9.3544	2.1988
	0.0175	5.2428	2.034	6.5337			0.0175	6.1858	9.3558	2.3895
	0.0176	5.1537	1.8997	0.40075			0.0176	6.0038	9.6582	0.74199
	0.0177	4.6032	1.9204	-2.7656			0.0177	5.9859	10.171	-1.9633
	0.0178	4.3621	1.769	-2.5627			0.0178	6.1537	9.9547	-6.0303
	0.0179	4.1186	1.6876	-3.7214			0.0179	6.0531	10.008	-9.5249
	0.018	4.0725	1.74	-3.1184			0.018	5.6937	10.573	-5.6602
	0.0181	3.8231	1.6822	-0.39861			0.0181	5.8143	10.91	0.38322
	0.0182	3.4081	1.4883	-0.84455			0.0182	5.766	10.983	0.12225
	0.0183	3.4108	1.2929	-1.384			0.0183	5.3969	10.992	-2.4766
	0.0184	3.1342	1.4538	0.18874			0.0184	5.4938	10.966	0.041733
	0.0185	3.4229	1.6323	-2.3833			0.0185	5.437	11.063	3.365
	0.0186	3.2931	1.8803	-3.8576			0.0186	5.2631	11.231	4.7635
	0.0187	2.4559	1.9216	2.0399			0.0187	5.4468	11.311	5.9148
	0.0188	2.3052	1.5631	7.3361			0.0188	5.3866	11.243	2.8942
	0.0189	2.5262	1.5419	2.9589			0.0189	5.0585	11.252	-0.64787
	0.019	2.5901	1.6954	-5.0021			0.019	4.9287	11.453	-1.7957
	0.0191	2.4939	1.7532	-3.3943			0.0191	5.0123	11.311	-1.9293
	0.0192	2.2214	1.8722	2.7795			0.0192	4.9963	11.281	0.96291
	0.0193	1.8854	2.0433	5.6371			0.0193	5.1465	11.329	1.2661
	0.0194	1.866	1.9055	4.8863			0.0194	5.2018	11.177	-0.13629
	0.0195	1.8957	1.665	0.5525			0.0195	4.827	11.151	-0.542
	0.0196	2.0118	1.5434	-5.4231			0.0196	4.6686	11.161	-2.1304
	0.0197	1.613	1.8289	-3.8799			0.0197	4.7686	10.954	-2.5692
	0.0198	1.3294	1.9824	2.8171			0.0198	4.8101	10.737	-0.69312
	0.0199	1.5318	1.9284	6.8565			0.0199	4.5282	10.664	0.1886
	0.02	1.5649	1.926	3.4384			0.02	4.5221	10.639	1.0444
	0.0201	1.521	1.8139	-1.3455			0.0201	4.7168	10.673	-0.17945
	0.0202	1.3722	1.8923	-1.6501			0.0202	4.8348	10.728	-3.4688
	0.0203	1.5774	1.8739	0.29534			0.0203	4.5555	10.541	-5.7946
	0.0204	1.8483	2.0581	3.559			0.0204	4.3845	10.268	-2.6346
	0.0205	1.6598	2.3643	0.24164			0.0205	4.7825	10.16	1.6313
	0.0206	1.9207	2.3413	-7.4628			0.0206	4.8843	10.247	0.027903
	0.0207	2.1064	2.4528	-10.924			0.0207	4.751	10.345	0.9223
	0.0208	1.7917	2.6088	-9.0301			0.0208	4.708	10.327	4.1764
	0.0209	1.9886	2.4319	-3.1672			0.0209	4.8218	10.408	2.2133
	0.021	2.2782	2.4001	0.56326			0.021	5.0435	10.342	-1.7163
	0.0211	2.3796	2.5275	4.7502			0.0211	5.2486	10.132	-3.7905
	0.0212	2.8153	2.6583	7.3287			0.0212	5.3997	10.392	-2.4096
	0.0213	2.9012	3.0716	6.0398			0.0213	5.1644	10.749	0.068919
	0.0214	2.6692	3.3394	4.1632			0.0214	4.7702	10.438	1.0263
	0.0215	2.7439	3.1822	2.0489			0.0215	4.8873	10.053	1.5156
	0.0216	3.2863	3.1883	0.48636			0.0216	5.06	10.185	5.0518
	0.0217	3.7367	3.195	1.1304			0.0217	4.9459	10.366	5.6721
	0.0218	3.8166	3.3144	-0.39819			0.0218	4.9694	10.346	3.0606
	0.0219	3.4182	3.8335	-3.0684			0.0219	4.828	10.505	2.9343
	0.022	3.4734	4.1206	-3.4584			0.022	4.7055	10.58	6.2706
	0.0221	3.6651	4.236	2.0588			0.0221	4.7922	10.377	5.2486
	0.0222	3.4498	4.2202	6.5876			0.0222	5.0237	10.255	-1.4334
	0.0223	3.3165	4.2731	0.72272			0.0223	4.9412	10.528	-5.7358
	0.0224	2.9855	4.498	-3.9227			0.0224	4.4214	10.563	-3.6919
	0.0225	3.1339	4.7482	-4.2409			0.0225	4.5046	10.209	-0.46261
	0.0226	3.3962	5.0742	-4.9866			0.0226	4.7326	10.314	-0.41097
	0.0227	3.0658	5.2594	-10.806			0.0227	4.8662	10.589	-3.0657
	0.0228	2.6602	5.1381	-10.958			0.0228	4.5748	10.529	-4.9992
	0.0229	2.2182	5.1189	1.3384			0.0229	3.8773	10.382	-3.7089
	0.023	1.6886	5.5638	12.713			0.023	3.7379	10.234	-3.1189
	0.0231	1.6954	5.5513	13.976			0.0231	3.8375	10.288	-1.3505
	0.0232	1.7039	5.5129	7.4564			0.0232	3.7862	10.559	1.635
	0.0233	1.6269	5.956	0.78305			0.0233	3.462	10.317	0.61955
	0.0234	1.117	6.0742	-2.3584			0.0234	3.1696	10.024	-0.40961
	0.0235	0.78765	5.9084	-2.4498			0.0235	3.2712	10.04	2.3206
	0.0236	0.77842	5.8361	-1.8561			0.0236	3.0192	10.12	2.081
	0.0237	0.40966	5.9506	-4.01			0.0237	2.6695	10.181	-0.65758
	0.0238	-0.14396	5.9856	-3.4189			0.0238	2.4127	10.276	-1.6418
	0.0239	-0.45943	6.1582	2.2139			0.0239	2.4124	10.428	0.59678
	0.024	-0.35276	6.1225	2.8935			0.024	2.4789	10.537	3.2982
	0.0241	-0.063944	5.9974	0.60057			0.0241	2.4921	10.364	2.4709
	0.0242	-0.18293	6.077	-0.69588			0.0242	2.4902	10.247	2.7876
	0.0243	-0.89366	6.073	-0.6729			0.0243	2.2494	10.573	3.6509
	0.0244	-0.9709	5.8509	-0.27112			0.0244	2.2794	10.637	0.20935
	0.0245	-0.3915	5.5312	-1.6575			0.0245	2.5139	10.486	-3.7634
	0.0246	-0.034699	5.5899	-3.457			0.0246	2.3112	10.832	-3.5432
	0.0247	0.020064	5.7126	-1.9577			0.0247	2.1589	11.131	-0.0046913
	0.0248	-0.090843	5.4768	1.6783			0.0248	2.2486	10.989	4.5439
	0.0249	-0.12247	5.212	1.2791			0.0249	2.4214	11.012	1.8187
	0.025	0.35773	5.2295	-0.025447			0.025	3.0786	11.119	-7.2614
	0.0251	0.67897	5.1364	3.0392			0.0251	3.1346	11.138	-8.4172
	0.0252	0.67772	4.7892	4.6895			0.0252	2.9291	11.149	0.51505
	0.0253	0.98489	4.8729	2.6976			0.0253	3.1749	11.309	4.2771
	0.0254	1.3177	4.8274	-3.2059			0.0254	3.5919	11.63	-0.3148
	0.0255	1.4667	4.7404	-3.9053			0.0255	3.9147	11.682	-3.6381
	0.0256	1.8471	4.8173	-1.3156			0.0256	4.1647	11.773	-5.0235
	0.0257	2.2096	4.6266	-2.1515			0.0257	4.136	11.778	-4.4925
	0.0258	2.4342	4.5557	-1.8386			0.0258	4.324	11.543	-0.47371
	0.0259	2.4057	4.6043	1.8275			0.0259	4.9073	11.658	3.0729
	0.026	2.5714	4.6808	3.2842			0.026	5.2021	11.845	3.6597
	0.0261	3.0108	4.4923	2.4108			0.0261	5.4466	11.777	3.2682
	0.0262	3.2053	4.2847	2.2088			0.0262	5.2716	11.713	7.3755
	0.0263	3.4434	4.4435	2.199			0.0263	5.3266	11.623	8.4419
	0.0264	3.4239	4.638	-0.38804			0.0264	5.877	11.59	0.61655
	0.0265	3.3373	4.4193	-1.0629			0.0265	6.433	11.669	-7.7796
	0.0266	3.2054	4.352	-0.67577			0.0266	6.3699	11.536	-5.2022
	0.0267	3.3451	4.3649	-3.8395			0.0267	5.9561	11.42	1.4717
	0.0268	3.4236	4.3352	-3.3085			0.0268	6.2019	11.319	3.6753
	0.0269	3.336	4.3365	1.7059			0.0269	6.6608	11.133	-0.12028
	0.027	3.3005	4.4441	2.4044			0.027	6.4915	11.036	-2.3153
	0.0271	3.0734	4.6454	1.7151			0.0271	6.3725	10.993	0.85436
	0.0272	2.9732	4.5329	2.2908			0.0272	6.534	10.925	2.1437
	0.0273	2.8365	4.5179	1.6202			0.0273	6.3129	10.796	0.18253
	0.0274	2.8182	4.5507	-0.80855			0.0274	6.5673	10.803	1.0408
	0.0275	2.6961	4.4658	-5.2321			0.0275	6.8732	10.783	4.1104
	0.0276	2.3531	4.5156	-5.4903			0.0276	6.6032	10.552	4.0421
	0.0277	2.3684	4.7949	-1.127			0.0277	6.3775	10.388	0.21915
	0.0278	2.0977	4.9191	-0.057555			0.0278	6.268	10.088	-2.8519
	0.0279	1.7965	4.7212	0.93927			0.0279	5.8792	10.013	-2.3982
	0.028	1.8737	4.4474	2.9053			0.028	5.8042	10.429	2.4682
	0.0281	1.8443	4.3652	-0.18087			0.0281	6.0954	10.565	3.4272
	0.0282	1.7849	4.6222	-2.9806			0.0282	6.0084	10.454	-3.4167
	0.0283	1.6486	4.715	0.14283			0.0283	5.5247	10.353	-10.271
	0.0284	1.5046	4.5628	1.7452			0.0284	5.4616	10.325	-7.2641
	0.0285	1.5185	4.4991	-0.0017789			0.0285	5.3329	10.392	-2.2091
	0.0286	1.5906	4.6407	0.032954			0.0286	5.3004	10.468	1.7451
	0.0287	1.6739	4.5991	3.6325			0.0287	5.1969	10.594	4.1407
	0.0288	1.8742	4.6015	5.0469			0.0288	4.8905	10.467	1.7788
	0.0289	1.9679	4.4932	1.3054			0.0289	4.9007	10.397	0.99763
	0.029	1.9458	4.3063	-4.3521			0.029	4.7239	10.614	2.1005
	0.0291	1.8756	4.5041	-6.3506			0.0291	4.5464	10.708	-0.30949
	0.0292	1.7568	4.612	-0.95747			0.0292	4.5113	10.663	-3.0615
	0.0293	1.9044	4.8241	0.39854			0.0293	4.7518	10.721	0.11839
	0.0294	1.8989	4.7721	-5.4209			0.0294	4.7094	10.764	3.8319
	0.0295	1.6336	4.3708	-8.358			0.0295	4.2529	10.587	2.4376
	0.0296	1.7691	4.3171	-4.8707			0.0296	4.1681	10.559	-4.2916
	0.0297	1.8213	4.5426	4.2301			0.0297	4.0817	10.706	-8.3273
	0.0298	1.6565	4.5873	9.8168			0.0298	4.1754	10.659	-6.759
	0.0299	1.7895	4.5338	5.5599			0.0299	4.5311	10.446	-0.335
	0.03	1.8607	4.6866	0.88371			0.03	4.1248	10.304	4.2328
	0.0301	1.702	4.7573	-0.15886			0.0301	3.5538	10.262	4.3507
	0.0302	1.5884	4.6737	-2.7663			0.0302	4.2688	10.142	2.9433
	0.0303	1.2099	4.7642	-2.1007			0.0303	4.7999	9.9476	2.4305
	0.0304	1.2248	4.8073	4.4603			0.0304	4.3841	9.8017	3.3558
	0.0305	1.6307	5.1091	10.727			0.0305	4.067	9.6724	3.6149
	0.0306	1.4015	5.2345	7.1492			0.0306	3.9764	9.6069	1.5844
	0.0307	0.61738	4.8119	-1.6079			0.0307	4.6353	9.2254	1.6536
	0.0308	-0.012671	4.9633	-6.2165			0.0308	4.7074	8.9837	0.1513
	0.0309	-0.26945	5.303	-3.6927			0.0309	4.4351	9.1251	-2.0806
	0.031	-0.29776	5.6214	-0.92055			0.031	4.4176	8.9904	0.23041
	0.0311	-0.70809	5.5904	-0.12729			0.0311	4.5886	8.7592	1.0472
	0.0312	-1.4276	5.3525	-0.24337			0.0312	4.829	8.5608	-0.77891
	0.0313	-1.991	5.5195	-2.0119			0.0313	4.5698	8.2472	-1.3678
	0.0314	-2.0986	5.6153	-5.3377			0.0314	4.3659	8.2388	-2.5255
	0.0315	-2.1569	5.7082	-0.9737			0.0315	4.5945	8.282	-3.9723
	0.0316	-2.7653	5.7727	6.3384			0.0316	4.6982	7.927	-4.2956
	0.0317	-3.1653	5.6105	5.6037			0.0317	4.3869	7.7817	-3.7419
	0.0318	-3.7591	5.5425	0.56138			0.0318	4.1912	7.9259	0.083576
	0.0319	-4.0723	5.8092	-1.5041			0.0319	4.257	7.904	7.869
	0.032	-3.7771	6.0071	0.51442			0.032	4.5116	7.5983	6.7965
	0.0321	-3.8631	5.9084	0.044379			0.0321	4.1597	7.6178	2.1135
	0.0322	-4.224	5.7077	-2.2672			0.0322	4.0217	7.9039	1.9067
	0.0323	-4.7285	5.76	1.1726			0.0323	4.1979	8.0101	0.26544
	0.0324	-5.2449	5.7598	2.4469			0.0324	3.9331	7.9376	-1.8913
	0.0325	-5.5131	5.6762	-3.1142			0.0325	3.7583	7.9184	-2.4086
	0.0326	-5.366	5.84	-7.4963			0.0326	3.4724	7.8736	-0.98601
	0.0327	-5.0402	5.7443	-6.2897			0.0327	3.4124	7.7816	1.6597
	0.0328	-5.4175	5.7587	-1.5931			0.0328	3.7288	7.8752	1.642
	0.0329	-6.0512	6.137	4.1175			0.0329	3.6138	7.8441	0.86211
	0.033	-5.8881	5.9368	5.3823			0.033	3.4013	7.6891	-0.58026
	0.0331	-5.7538	5.713	4.1159			0.0331	3.2666	7.7175	-4.8174
	0.0332	-5.6281	5.9127	2.6733			0.0332	3.066	7.9811	-6.3231
	0.0333	-5.4839	5.943	0.061923			0.0333	3.1811	8.0755	-5.7116
	0.0334	-5.4473	5.9895	-2.6971			0.0334	3.4236	7.7262	-0.44911
	0.0335	-5.4436	6.207	-5.3686			0.0335	3.3558	7.663	3.1706
	0.0336	-5.1695	6.1632	-4.451			0.0336	3.2541	7.8985	0.25047
	0.0337	-4.6457	6.025	1.9944			0.0337	3.0212	7.9508	-2.1865
	0.0338	-4.8203	5.8158	6.6933			0.0338	3.0847	7.9784	-2.9138
	0.0339	-5.2426	6.0622	2.5039			0.0339	3.5836	8.188	-3.0916
	0.034	-5.0489	6.4363	-6.1199			0.034	3.777	8.2207	4.0164
	0.0341	-4.4425	6.1837	-9.2346			0.0341	3.8614	7.9529	9.1242
	0.0342	-4.1527	5.9347	-2.4389			0.0342	3.978	7.7344	3.4724
	0.0343	-4.2936	5.9085	6.5922			0.0343	4.0394	7.7548	-4.7317
	0.0344	-4.5377	5.9922	8.8083			0.0344	4.1125	7.9565	-5.8284
	0.0345	-4.2578	6.1722	6.1528			0.0345	4.2497	7.963	-2.9439
	0.0346	-3.7888	6.2282	0.099391			0.0346	4.7094	7.7411	-3.0225
	0.0347	-3.568	6.1471	-8.308			0.0347	5.0042	7.4799	-0.27724
	0.0348	-3.5636	6.1689	-8.8133			0.0348	4.9583	7.3294	4.7817
	0.0349	-3.5751	6.0518	0.7611			0.0349	5.0224	7.5303	6.5594
	0.035	-3.5767	6.2189	10.975			0.035	5.4042	7.7914	3.9803
	0.0351	-3.349	6.4273	10.156			0.0351	5.6075	7.7045	2.7121
	0.0352	-3.0866	6.2164	1.4991			0.0352	5.4782	7.4283	0.25827
	0.0353	-3.1771	6.2914	-6.9974			0.0353	5.6537	7.5727	-3.0439
	0.0354	-3.1657	6.3068	-7.1029			0.0354	5.879	7.8233	-4.2816
	0.0355	-3.2315	5.9307	-2.0141			0.0355	6.1582	7.6852	-4.3128
	0.0356	-3.3517	5.8831	2.1754			0.0356	6.1553	7.546	-2.539
	0.0357	-3.3872	6.3491	2.7078			0.0357	6.1943	7.4542	0.5095
	0.0358	-3.2972	6.4485	0.65176			0.0358	6.2381	7.6775	3.0445
	0.0359	-3.5769	6.0413	-4.1848			0.0359	6.139	7.8083	3.821
	0.036	-3.7237	6.0163	-5.436			0.036	6.162	8.0948	4.7328
	0.0361	-3.5546	6.0813	-0.15315			0.0361	6.4505	8.244	3.7968
	0.0362	-3.5078	6.0311	2.9779			0.0362	6.6067	7.8869	-3.0411
	0.0363	-3.4706	6.0465	-0.2077			0.0363	6.16	7.9088	-6.8832
	0.0364	-3.8484	6.2538	-3.2297			0.0364	6.0747	8.1469	-3.7224
	0.0365	-4.2834	6.2684	-1.7375			0.0365	6.1227	8.47	1.9186
	0.0366	-4.2895	6.0581	-0.30141			0.0366	6.2637	8.6445	3.6225
	0.0367	-4.1991	6.1466	1.2473			0.0367	6.1699	8.3846	3.6922
	0.0368	-4.5136	6.2183	2.4734			0.0368	5.575	8.2721	3.6512
	0.0369	-4.6229	6.1614	3.1578			0.0369	5.4055	8.548	0.12529
	0.037	-4.698	6.242	3.1143			0.037	5.876	8.726	-2.6581
	0.0371	-5.1792	6.1529	-0.26234			0.0371	6.3411	8.7495	-0.21407
	0.0372	-5.0978	6.1663	-2.4269			0.0372	6.2146	8.6229	2.0496
	0.0373	-4.7056	6.1987	-1.8438			0.0373	5.9444	8.5938	2.1531
	0.0374	-4.7164	6.265	-0.51804			0.0374	5.7533	8.8131	1.7688
	0.0375	-4.9166	6.2889	0.59605			0.0375	5.6293	8.7551	-2.3458
	0.0376	-4.9632	6.3566	1.3621			0.0376	5.8095	8.772	-4.7919
	0.0377	-4.3315	6.5874	3.0206			0.0377	6.2059	8.8959	-0.93341
	0.0378	-3.9736	6.4886	3.5211			0.0378	6.4358	8.7964	2.8145
	0.0379	-4.0697	6.582	-0.23164			0.0379	6.3817	8.705	2.8872
	0.038	-3.9715	6.7561	-4.1816			0.038	6.5257	8.7089	3.7377
	0.0381	-3.4968	6.7131	-4.2817			0.0381	6.8231	8.7636	2.8998
	0.0382	-3.0089	6.7417	-2.4585			0.0382	6.5303	8.6885	-1.547
	0.0383	-2.822	6.7174	3.374			0.0383	6.7753	8.596	-3.6649
	0.0384	-2.6916	6.8189	7.7506			0.0384	7.3345	8.3995	-5.9293
	0.0385	-2.6166	6.8569	6.7883			0.0385	7.2207	8.1194	-3.8541
	0.0386	-2.439	6.7864	5.2914			0.0386	7.698	8.2003	5.144
	0.0387	-2.0588	6.8641	2.553			0.0387	8.3247	8.5752	9.459
	0.0388	-1.4074	6.8789	-1.7413			0.0388	8.3049	8.5892	4.8423
	0.0389	-0.78523	6.6816	-7.7851			0.0389	8.3082	8.3098	-1.7367
	0.039	-0.62739	6.5103	-10.929			0.039	8.4746	8.0717	-4.3389
	0.0391	-0.61533	6.3772	-6.4997			0.0391	8.1482	8.1973	-2.1714
	0.0392	-0.16504	6.2958	-1.6222			0.0392	8.167	8.3087	-3.2867
	0.0393	0.20412	6.2927	0.46922			0.0393	8.5916	8.4091	-5.9547
	0.0394	0.56752	6.2943	7.0205			0.0394	8.3712	8.5793	-6.6769
	0.0395	0.36631	6.2974	8.7109			0.0395	8.1536	8.4464	-4.4811
	0.0396	-0.35087	5.879	-0.3016			0.0396	8.2997	8.3604	2.644
	0.0397	-0.023298	5.5064	-4.6265			0.0397	8.2014	8.2033	7.5138
	0.0398	0.53448	5.5204	1.2722			0.0398	7.9937	8.1933	8.0768
	0.0399	0.41586	5.7962	3.5119			0.0399	7.5741	8.3916	3.8755
	0.04	-0.076235	5.754	-2.5009			0.04	7.1258	8.2741	-1.3484
	0.0401	-0.047316	5.399	-7.5996			0.0401	7.4249	8.2323	-1.8927
	0.0402	-0.31259	5.2729	-6.9925			0.0402	7.6185	8.1086	-4.4923
	0.0403	-0.85747	5.1617	-2.4844			0.0403	7.0675	7.711	-8.3248
	0.0404	-0.82107	5.0266	3.858			0.0404	6.5132	7.861	-6.6969
	0.0405	-1.0959	5.1654	8.4929			0.0405	6.3659	7.87	0.4446
	0.0406	-1.3696	5.0414	6.5075			0.0406	6.3459	7.7512	3.1778
	0.0407	-1.5572	4.8682	1.1357			0.0407	6.5352	7.6807	1.9534
	0.0408	-1.6624	4.8006	-2.6156			0.0408	6.421	7.244	5.1856
	0.0409	-1.8506	4.5309	-6.1606			0.0409	5.5338	6.9071	4.3416
	0.041	-2.4447	4.6552	-6.1613			0.041	5.0914	6.8045	-2.0738
	0.0411	-2.787	4.7091	1.187			0.0411	5.0151	7.0423	-6.9119
	0.0412	-3.0171	4.8046	7.9783			0.0412	5.0075	6.9291	-7.4493
	0.0413	-3.4725	4.9097	5.0294			0.0413	4.8467	6.2632	-1.4055
	0.0414	-4.0987	4.5483	-1.755			0.0414	4.9975	6.1413	4.949
	0.0415	-4.3436	4.475	-0.31057			0.0415	5.3022	6.5097	6.2209
	0.0416	-4.404	4.7198	0.56528			0.0416	5.0624	6.201	4.4588
	0.0417	-4.624	5.0263	-2.7424			0.0417	5.183	5.6045	2.5527
	0.0418	-4.4505	4.9473	-3.8809			0.0418	5.3176	5.5157	1.6095
	0.0419	-4.3329	4.8193	-2.4689			0.0419	5.44	5.6973	-1.7893
	0.042	-4.7776	5.1492	0.48341			0.042	5.3029	5.5257	-4.3177
	0.0421	-5.0337	5.1043	2.9067			0.0421	5.4699	5.1513	-2.7541
	0.0422	-4.3338	4.9579	3.973			0.0422	6.0379	5.0062	3.1156
	0.0423	-4.3523	4.8099	1.2353			0.0423	6.3375	4.8364	3.0914
	0.0424	-4.9319	4.8819	-2.4968			0.0424	6.4465	4.6183	0.069807
	0.0425	-4.5958	5.1906	1.3683			0.0425	6.332	4.4899	1.239
	0.0426	-3.9142	5.0774	3.064			0.0426	6.3991	4.3385	3.7459
	0.0427	-3.768	4.7541	-1.8801			0.0427	6.37	4.2	2.337
	0.0428	-4.2104	4.805	-4.0055			0.0428	6.4165	4.5682	-2.2029
	0.0429	-4.1739	5.0673	-0.35896			0.0429	6.728	4.7162	-5.7621
	0.043	-3.8075	4.9589	3.9964			0.043	6.7412	4.3832	-4.2038
	0.0431	-3.5505	4.8716	6.0944			0.0431	6.8443	4.029	0.93592
	0.0432	-3.4909	4.8787	-0.12835			0.0432	7.0027	4.159	4.6618
	0.0433	-3.5452	4.9164	-6.8626			0.0433	7.3771	4.4623	6.8021
	0.0434	-3.5224	4.8876	-5.0655			0.0434	7.3292	4.4709	4.8043
	0.0435	-3.3011	4.8639	1.9011			0.0435	7.006	4.6441	-3.0933
	0.0436	-3.2829	4.9313	6.0142			0.0436	7.1094	4.7684	-7.009
	0.0437	-3.5109	4.7443	2.7065			0.0437	7.2702	4.734	-5.935
	0.0438	-3.3778	4.6541	-0.18382			0.0438	7.4596	4.8463	-6.5017
	0.0439	-3.1297	4.5657	1.4929			0.0439	7.3818	4.8705	-5.3441
	0.044	-3.2736	4.4481	0.034131			0.044	6.9821	4.6488	-0.63422
	0.0441	-3.5423	4.4383	-2.5135			0.0441	6.49	5.0495	3.0913
	0.0442	-3.661	4.5266	-1.0391			0.0442	6.4879	5.2839	4.7947
	0.0443	-4.0344	4.515	-0.48739			0.0443	6.744	5.2685	2.9415
	0.0444	-4.2913	4.4211	-3.8941			0.0444	6.4862	5.5695	-2.3386
	0.0445	-4.3694	4.3221	-8.3317			0.0445	6.0565	5.5483	-3.7625
	0.0446	-4.3787	3.9797	-8.482			0.0446	6.0102	5.6456	2.5293
	0.0447	-4.6355	4.0923	-4.1951			0.0447	5.963	5.8116	6.8024
	0.0448	-4.9925	4.4035	1.8712			0.0448	6.0438	5.9512	4.3936
	0.0449	-5.0667	4.5661	5.9458			0.0449	6.2486	5.9601	2.9146
	0.045	-5.2659	4.5862	7.1336			0.045	6.1829	5.9945	3.8421
	0.0451	-5.5733	4.3577	4.3242			0.0451	5.8476	6.0908	2.9903
	0.0452	-5.6321	4.4549	2.2479			0.0452	5.6229	5.9721	1.3605
	0.0453	-5.7458	4.6938	1.8693			0.0453	5.9454	5.9615	-0.077461
	0.0454	-5.781	4.656	-1.1456			0.0454	6.0809	6.0263	-1.3615
	0.0455	-5.6997	4.5637	-3.4804			0.0455	6.0867	6.1421	-5.6866
	0.0456	-5.6974	4.5654	-1.3885			0.0456	5.9684	6.1962	-8.9607
	0.0457	-5.6887	4.4839	1.591			0.0457	5.6532	5.9324	-8.5998
	0.0458	-5.9675	4.5597	-1.951			0.0458	5.874	5.8161	-5.1779
	0.0459	-6.0758	4.8079	-6.6284			0.0459	6.0621	6.0328	0.26113
	0.046	-6.0124	4.8718	-4.7663			0.046	5.8343	6.4392	6.5707
	0.0461	-5.9869	4.6686	1.7729			0.0461	5.8332	6.8296	10.035
	0.0462	-5.7789	4.5326	7.3102			0.0462	6.0823	6.8458	4.888
	0.0463	-5.641	4.7802	9.7528			0.0463	6.1079	6.9218	-0.34036
	0.0464	-5.5399	4.7051	5.6972			0.0464	6.2224	7.3103	-2.5047
	0.0465	-5.5958	4.6465	-3.417			0.0465	6.1942	7.7478	-3.8583
	0.0466	-5.697	4.8507	-6.4662			0.0466	6.0169	7.9406	-3.2125
	0.0467	-5.5483	4.6026	-1.0517			0.0467	5.8423	8.2734	-0.58543
	0.0468	-5.3733	4.6077	1.2029			0.0468	5.8816	8.8166	-0.074724
	0.0469	-5.2263	4.7533	1.2794			0.0469	6.0051	9.32	-0.61698
	0.047	-4.8986	4.6963	0.74247			0.047	5.8394	9.7565	-0.89289
	0.0471	-4.9911	4.7605	-2.8276			0.0471	5.8871	10.277	2.0256
	0.0472	-5.1689	4.7372	-4.4302			0.0472	5.4869	10.676	1.9675
	0.0473	-4.7026	4.4722	-1.9815			0.0473	4.8294	10.982	-1.5463
	0.0474	-4.4352	4.5456	-0.48687			0.0474	4.5632	11.716	-2.1522
	0.0475	-4.8244	4.5717	-0.43225			0.0475	4.3125	12.186	-0.46963
	0.0476	-5.2392	4.3718	1.08			0.0476	4.4908	12.785	1.4549
	0.0477	-5.5262	4.6545	2.9838			0.0477	4.4749	13.324	-0.2346
	0.0478	-5.3525	4.8091	-0.95009			0.0478	4.1624	13.529	0.059737
	0.0479	-5.1182	4.7357	-5.9514			0.0479	3.8932	14.26	2.456
	0.048	-4.9399	4.7509	-5.4236			0.048	3.3954	14.873	1.6306
	0.0481	-4.7402	5.0452	0.69511			0.0481	3.2127	15.18	-0.42757
	0.0482	-5.367	5.175	5.9418			0.0482	3.0973	15.602	2.5085
	0.0483	-5.6939	4.9177	8.7495			0.0483	2.9677	15.858	5.4911
	0.0484	-5.7324	4.8723	7.8157			0.0484	2.7467	16.119	5.3235
	0.0485	-5.6729	5.1622	1.5579			0.0485	2.5016	16.612	2.1025
	0.0486	-5.4063	5.3537	-2.8806			0.0486	2.7107	17.098	-3.937
	0.0487	-5.3975	5.4972	0.029928			0.0487	2.6196	17.332	-8.09
	0.0488	-5.706	5.6364	0.76203			0.0488	2.48	17.272	-7.1631
	0.0489	-6.2089	5.5774	-3.6107			0.0489	2.549	17.198	-0.97077
	0.049	-6.2367	5.5212	-6.3654			0.049	2.3616	17.322	2.9482
	0.0491	-6.2648	5.4195	-2.8616			0.0491	2.5656	17.728	2.3965
	0.0492	-6.3632	5.6273	4.0383			0.0492	2.8198	17.928	2.1891
	0.0493	-6.6463	5.8913	2.1899			0.0493	2.5442	17.674	1.3546
	0.0494	-7.2786	6.1652	-3.8024			0.0494	2.8667	17.491	-2.8711
	0.0495	-7.22	6.26	-3.9583			0.0495	3.6605	17.24	-5.1018
	0.0496	-7.0758	6.166	-1.6564			0.0496	3.7958	17.268	-5.2674
	0.0497	-7.39	6.2489	4.258			0.0497	3.4747	17.179	-4.2321
	0.0498	-7.5025	6.0637	9.9452			0.0498	3.4228	16.697	-0.22184
	0.0499	-7.6858	6.1158	8.7134			0.0499	3.7621	16.614	3.7907
	0.05	-8.1673	6.4594	3.1336			0.05	4.219	16.479	5.2992
	0.0501	-8.0266	6.3643	-4.3001			0.0501	4.398	16.397	4.6352
	0.0502	-7.8118	6.08	-6.4165			0.0502	4.285	16.318	-0.41385
	0.0503	-8.458	6.0044	-5.9519			0.0503	4.3736	15.736	-0.00090261
	0.0504	-8.7118	5.8053	-8.345			0.0504	4.6634	15.32	3.817
	0.0505	-8.8862	5.6687	-7.8512			0.0505	4.7605	15.421	6.3588
	0.0506	-9.4348	5.8012	-1.6969			0.0506	4.6593	15.265	5.9921
	0.0507	-9.7154	5.6915	5.8344			0.0507	4.7035	15.089	-0.54069
	0.0508	-9.8659	5.5011	7.6086			0.0508	4.6302	14.913	-6.9484
	0.0509	-10.32	5.5162	2.829			0.0509	4.5675	14.422	-6.1355
	0.051	-10.783	5.373	1.1331			0.051	4.8011	14.429	-2.2538
	0.0511	-10.897	5.1797	2.7586			0.0511	4.7776	14.67	-3.8589
	0.0512	-11.112	5.0663	0.78219			0.0512	4.4751	14.4	-6.5895
	0.0513	-11.471	5.0822	-0.969			0.0513	4.3424	14.102	-4.1045
	0.0514	-11.704	5.1627	-0.51887			0.0514	4.1049	14.134	-0.13902
	0.0515	-11.978	4.9899	-1.6765			0.0515	3.8681	14.087	1.6737
	0.0516	-12.316	4.8797	-2.206			0.0516	3.863	13.955	4.1564
	0.0517	-12.583	4.6634	2.4835			0.0517	3.9526	14.117	1.6237
	0.0518	-12.825	4.506	4.8074			0.0518	3.7403	14.182	1.1903
	0.0519	-12.847	4.7219	2.2087			0.0519	3.485	14.193	4.7106
	0.052	-12.877	4.5155	-0.92312			0.052	3.4794	14.39	0.8638
	0.0521	-13.107	4.2755	-4.44			0.0521	3.5828	14.185	-4.2613
	0.0522	-13.496	4.2921	-3.5449			0.0522	3.3704	14.214	-3.9205
	0.0523	-13.669	4.1286	-3.3597			0.0523	3.1033	14.551	-1.5267
	0.0524	-13.801	4.0785	-5.8223			0.0524	3.0989	14.393	0.91854
	0.0525	-13.821	4.3497	-2.08			0.0525	3.0577	14.029	2.4058
	0.0526	-13.739	4.4307	4.768			0.0526	3.3997	13.953	1.8519
	0.0527	-14.002	4.3532	7.5942			0.0527	3.4247	14.037	4.264
	0.0528	-14.276	4.4088	5.7451			0.0528	3.2358	14.173	8.0241
	0.0529	-14.085	4.2906	-0.14953			0.0529	3.2166	14.182	5.0973
	0.053	-13.852	4.336	-2.9694			0.053	3.5872	13.864	-0.114
	0.0531	-13.825	4.5398	-2.4544			0.0531	3.9966	13.427	-2.5001
	0.0532	-13.978	4.4824	-0.040054			0.0532	3.7357	13.296	-2.846
	0.0533	-14.09	4.5003	3.0076			0.0533	3.9366	13.488	-1.0067
	0.0534	-13.816	4.6476	-0.65819			0.0534	4.1848	13.455	1.4935
	0.0535	-13.364	4.7495	-5.8127			0.0535	4.2842	13.208	2.6307
	0.0536	-13.163	4.6321	-4.3562			0.0536	4.7839	13.094	0.061469
	0.0537	-13.339	4.4051	0.0021384			0.0537	5.0113	12.962	-4.8131
	0.0538	-13.446	4.5242	3.4493			0.0538	4.9798	12.926	-6.4173
	0.0539	-13.108	4.6777	4.2716			0.0539	5.1046	13.058	-4.3933
	0.054	-12.566	4.5515	1.3543			0.054	5.0284	12.8	-0.030306
	0.0541	-12.351	4.5085	0.58441			0.0541	5.2734	12.452	1.5012
	0.0542	-12.164	4.5803	3.0695			0.0542	5.6414	12.399	-0.48365
	0.0543	-12.062	4.4814	2.7468			0.0543	5.4746	12.569	-4.7091
	0.0544	-12.168	4.3618	-0.021416			0.0544	5.4579	12.393	-2.3024
	0.0545	-12.102	4.3741	-3.2183			0.0545	5.5971	12.174	3.0855
	0.0546	-11.686	4.6656	-3.9882			0.0546	5.6784	12.153	6.1554
	0.0547	-11.189	4.7444	-1.6327			0.0547	5.6576	11.931	6.8665
	0.0548	-11.045	4.3342	-0.92204			0.0548	5.4561	11.991	4.9302
	0.0549	-11.255	4.177	2.0879			0.0549	5.5319	12.04	3.4864
	0.055	-11.44	4.258	3.607			0.055	5.4566	11.969	0.32844
	0.0551	-11.39	4.3497	0.85509			0.0551	5.3457	11.882	-2.6427
	0.0552	-11.362	4.275	-2.8168			0.0552	5.1179	11.821	-0.53325
	0.0553	-11.397	3.9839	-0.22141			0.0553	4.8835	11.968	2.1795
	0.0554	-11.251	3.8397	0.56312			0.0554	4.9275	12.041	-2.7085
	0.0555	-11.202	3.8593	-0.44167			0.0555	4.522	11.922	-8.9013
	0.0556	-11.195	3.9351	4.2788			0.0556	4.1929	11.977	-3.868
	0.0557	-11.09	3.7697	5.6836			0.0557	3.9173	11.958	2.2332
	0.0558	-11.316	3.7651	-2.8309			0.0558	3.557	12.031	-1.3143
	0.0559	-11.531	3.7372	-12.291			0.0559	3.4622	12.256	-4.8187
	0.056	-11.49	3.4522	-12.78			0.056	3.4426	12.357	-2.5261
	0.0561	-11.227	3.2403	-5.7678			0.0561	3.2439	12.509	3.3376
	0.0562	-11.451	3.5091	3.7657			0.0562	3.1232	12.51	7.5425
	0.0563	-11.714	3.7957	8.5469			0.0563	2.6085	12.377	3.319
	0.0564	-11.52	3.4428	4.806			0.0564	2.1425	12.326	-2.8269
	0.0565	-11.423	3.2454	3.6169			0.0565	2.2406	12.91	-6.5748
	0.0566	-11.539	3.4237	6.3565			0.0566	2.3865	13.326	-3.8822
	0.0567	-11.568	3.3578	3.704			0.0567	2.2856	12.933	4.2923
	0.0568	-11.466	3.1297	0.1125			0.0568	1.9901	12.658	7.0783
	0.0569	-11.912	3.1205	-3.2067			0.0569	1.6206	13.117	3.9519
	0.057	-11.847	3.0955	-6.3682			0.057	1.3586	13.801	3.4811
	0.0571	-11.38	3.1544	-7.0143			0.0571	1.3733	13.934	0.9566
	0.0572	-11.319	3.0296	-3.4761			0.0572	1.3383	13.805	-5.1002
	0.0573	-11.175	3.1651	2.1422			0.0573	1.4457	13.686	-5.6682
	0.0574	-11.266	3.4263	4.1252			0.0574	1.2082	13.697	-1.0645
	0.0575	-11.267	3.3306	2.0291			0.0575	0.82869	14.077	-1.6725
	0.0576	-10.869	3.1105	-1.6553			0.0576	0.87997	14.446	-3.8059
	0.0577	-10.766	3.0146	-3.3531			0.0577	0.96486	14.717	-0.48723
	0.0578	-10.731	3.1164	-2.34			0.0578	0.96849	15.024	2.8878
	0.0579	-10.498	3.2871	-1.5046			0.0579	0.84851	14.885	3.4571
	0.058	-10.347	3.5493	2.4195			0.058	0.80017	14.697	0.32938
	0.0581	-10.237	3.4613	6.6254			0.0581	1.0155	14.871	-1.6114
	0.0582	-10.064	3.2103	2.9622			0.0582	0.92367	15.178	-0.89757
	0.0583	-9.8715	3.1576	-2.5671			0.0583	0.54086	15.256	-0.83102
	0.0584	-9.7838	3.1521	-2.1501			0.0584	0.34608	15.05	-0.73976
	0.0585	-9.8875	2.9663	0.19517			0.0585	0.17976	15.304	-0.11146
	0.0586	-9.4623	2.8723	-2.5125			0.0586	0.30554	15.851	1.1466
	0.0587	-8.9349	3.0242	-4.3479			0.0587	0.48242	15.846	1.83
	0.0588	-8.884	3.2355	-0.44255			0.0588	0.41266	15.586	2.679
	0.0589	-9.0053	3.3026	6.6575			0.0589	-0.0076761	15.553	1.9605
	0.059	-8.8146	3.0642	6.3814			0.059	-0.14391	15.694	0.84894
	0.0591	-8.3891	2.8653	2.1454			0.0591	0.15583	15.873	-0.11614
	0.0592	-8.2204	2.837	0.52605			0.0592	0.14925	15.843	-6.2376
	0.0593	-8.3155	2.7018	-0.2065			0.0593	-0.18037	15.783	-9.2062
	0.0594	-8.2635	2.5347	2.0079			0.0594	-0.082453	15.854	-2.9126
	0.0595	-7.7541	2.6061	5.0526			0.0595	-0.078411	15.833	8.3513
	0.0596	-7.637	2.6263	2.2188			0.0596	-0.20786	15.439	16.683
	0.0597	-7.6672	2.5009	-4.8497			0.0597	-0.17652	15.137	12.491
	0.0598	-7.5724	2.3116	-6.261			0.0598	-0.32246	15.29	1.8118
	0.0599	-7.6357	2.0981	-3.4833			0.0599	-0.35957	15.122	-2.5
	0.06	-7.6511	2.0889	-1.7385			0.06	-0.32167	14.824	-0.74473
	0.0601	-7.441	2.0202	-1.1105			0.0601	-0.37222	14.841	-4.45
	0.0602	-7.46	1.8407	0.78234			0.0602	-0.44763	14.88	-11.323
	0.0603	-7.8068	1.7552	2.3547			0.0603	-0.53458	14.835	-9.4418
	0.0604	-7.8778	1.8024	-1.382			0.0604	-0.6382	14.595	-4.0894
	0.0605	-7.8468	1.8101	-3.2451			0.0605	-0.70806	14.41	-3.0533
	0.0606	-7.7555	1.8019	0.20529			0.0606	-0.74357	14.425	-2.0049
	0.0607	-7.783	1.6394	2.5676			0.0607	-0.72532	14.386	3.1932
	0.0608	-7.9935	1.6484	2.9265			0.0608	-0.69934	14.295	5.729
	0.0609	-8.3175	1.8221	5.8502			0.0609	-0.63508	14.281	1.7216
	0.061	-8.1251	1.7018	10.474			0.061	-0.87307	14.278	-3.6491
	0.0611	-7.8396	1.5466	4.8906			0.0611	-1.0383	14.019	-2.4696
	0.0612	-8.057	1.43	-5.0882			0.0612	-0.98533	13.643	2.8727
	0.0613	-7.9854	1.6142	-8.397			0.0613	-0.89958	13.675	4.3618
	0.0614	-7.773	2.0164	-8.8718			0.0614	-1.1709	13.728	0.5525
	0.0615	-8.0012	2.0808	-4.1862			0.0615	-1.3756	13.716	-0.1074
	0.0616	-8.1022	1.9458	3.8268			0.0616	-1.5467	13.771	0.0032664
	0.0617	-7.4557	1.7519	3.7311			0.0617	-1.5534	13.816	-3.1373
	0.0618	-7.461	1.7689	-0.37501			0.0618	-1.3622	13.743	-2.9108
	0.0619	-7.967	2.132	-0.23138			0.0619	-1.5961	13.646	1.8457
	0.062	-7.482	2.4733	1.4485			0.062	-1.6724	13.804	2.4099
	0.0621	-7.2276	2.684	1.3929			0.0621	-1.887	14.096	-2.3384
	0.0622	-7.5795	2.5296	-1.1941			0.0622	-1.9026	14.102	-2.2817
	0.0623	-7.6105	2.4483	-0.643			0.0623	-1.7558	13.935	2.8045
	0.0624	-7.4165	2.5666	3.0074			0.0624	-1.826	14.062	6.516
	0.0625	-7.4698	2.7484	2.6555			0.0625	-1.6979	14.186	9.6622
	0.0626	-7.6482	3.0394	-1.563			0.0626	-1.6372	13.973	8.1016
	0.0627	-7.6064	3.1984	-6.9504			0.0627	-1.4376	13.857	-2.7182
	0.0628	-7.493	3.0303	-4.6392			0.0628	-1.3042	13.865	-12.153
	0.0629	-7.3976	2.9781	0.76207			0.0629	-1.4265	13.825	-11.139
	0.063	-7.5262	3.182	0.50738			0.063	-1.3141	13.889	-4.6045
	0.0631	-7.7936	3.1871	-1.8992			0.0631	-1.2647	13.723	-0.53044
	0.0632	-8.0516	3.1731	-3.1793			0.0632	-1.3122	13.473	2.1339
	0.0633	-8.1047	3.0018	-1.5543			0.0633	-1.2436	13.61	1.1779
	0.0634	-7.9347	2.8046	1.598			0.0634	-1.1171	13.515	1.8542
	0.0635	-8.0707	2.9775	-0.70288			0.0635	-0.83385	13.182	4.941
	0.0636	-8.7051	2.8922	-0.54844			0.0636	-0.96666	13.079	3.5437
	0.0637	-9.2065	2.7552	2.1224			0.0637	-1.0402	13.072	-3.3914
	0.0638	-9.0959	2.7751	-0.31826			0.0638	-0.76724	13.079	-9.1479
	0.0639	-9.4962	2.658	-2.6919			0.0639	-0.75045	12.823	-7.9877
	0.064	-10.443	2.3509	2.9846			0.064	-0.88209	12.629	-0.87094
	0.0641	-10.647	2.4475	8.8418			0.0641	-0.01209	12.242	5.5199
	0.0642	-10.845	2.5526	8.6447			0.0642	0.30184	12.028	6.7925
	0.0643	-11.183	2.2562	1.55			0.0643	-0.32634	12.14	8.5743
	0.0644	-11.746	2.0388	-7.9784			0.0644	-0.075932	12.111	10.485
	0.0645	-11.936	2.0341	-10.631			0.0645	0.027401	12.009	4.4819
	0.0646	-11.459	2.3818	-5.4935			0.0646	0.25815	11.735	-5.2668
	0.0647	-11.927	2.2813	1.3013			0.0647	0.61483	11.39	-6.776
	0.0648	-12.851	2.0033	4.5612			0.0648	0.4961	11.204	-2.7235
	0.0649	-12.553	1.897	4.8479			0.0649	0.40261	11.298	-0.55538
	0.065	-12.192	1.8894	5.8082			0.065	0.50288	11.402	-2.343
	0.0651	-12.239	2.0935	3.3502			0.0651	0.49215	11.469	-5.3088
	0.0652	-12.197	1.9679	-0.016898			0.0652	0.54872	11.598	-3.8355
	0.0653	-12.441	1.8625	1.2294			0.0653	0.50011	11.468	2.0175
	0.0654	-12.343	2.1514	1.4576			0.0654	0.31411	11.289	7.4309
	0.0655	-12.352	2.4891	-0.71488			0.0655	0.49669	11.531	7.655
	0.0656	-12.458	2.5883	-1.4242			0.0656	0.51058	11.466	2.0922
	0.0657	-12.098	2.5902	-2.0499			0.0657	0.35921	11.655	-4.569
	0.0658	-12.035	2.6546	-4.0269			0.0658	0.50404	12.16	-6.6437
	0.0659	-11.679	2.7529	-5.7811			0.0659	0.37029	12.276	-2.4164
	0.066	-11.055	2.916	-8.2659			0.066	0.034684	12.31	2.0076
	0.0661	-10.516	3.2083	-4.3145			0.0661	0.11157	12.301	1.8562
	0.0662	-10.066	3.4535	5.3833			0.0662	0.072546	12.25	-1.6101
	0.0663	-10.112	3.2326	9.3527			0.0663	0.21185	12.579	-2.0118
	0.0664	-9.294	3.4712	7.9179			0.0664	0.075633	13.147	2.491
	0.0665	-8.7604	3.8665	4.8582			0.0665	-0.45236	13.138	5.3426
	0.0666	-8.5137	3.7899	2.5938			0.0666	-0.5113	13.033	2.9391
	0.0667	-7.6142	3.9271	-0.94711			0.0667	-0.44189	13.396	-1.8163
	0.0668	-7.7287	3.9327	-6.5808			0.0668	-0.4012	13.693	-2.3002
	0.0669	-7.7751	3.8965	-7.9906			0.0669	-0.55991	13.733	-1.4699
	0.067	-7.1248	3.9352	-4.471			0.067	-0.79842	13.659	-3.5687
	0.0671	-6.8312	4.1001	1.6738			0.0671	-0.73501	13.741	-2.811
	0.0672	-6.5504	4.4009	5.9397			0.0672	-0.62826	13.883	-1.7291
	0.0673	-6.4407	4.4988	1.2145			0.0673	-0.67166	14.022	-3.3373
	0.0674	-6.799	4.5071	-4.5843			0.0674	-0.53684	14.259	0.13872
	0.0675	-6.5822	4.383	-3.4367			0.0675	-0.50596	14.406	7.0941
	0.0676	-6.3629	4.4525	0.68344			0.0676	-0.56305	14.426	9.14
	0.0677	-6.317	4.4469	1.7992			0.0677	-0.47202	14.3	7.1605
	0.0678	-6.1998	4.536	0.33658			0.0678	-0.39558	13.894	3.366
	0.0679	-6.6623	4.7695	-0.82009			0.0679	-0.65052	13.846	-0.67457
	0.068	-6.8472	4.5777	-1.5877			0.068	-0.55697	14.367	-5.0631
	0.0681	-6.5777	4.4088	-1.6508			0.0681	0.090247	14.594	-6.8885
	0.0682	-6.6269	4.5495	-3.4003			0.0682	0.1363	14.482	-8.5744
	0.0683	-7.381	4.7806	-1.3355			0.0683	0.059568	14.233	-7.5644
	0.0684	-7.7566	4.6423	-0.37486			0.0684	0.45136	14.228	-1.7228
	0.0685	-7.8692	4.3201	-2.2775			0.0685	0.46412	14.404	0.12242
	0.0686	-8.505	4.3957	1.4911			0.0686	-0.14391	14.418	-1.4192
	0.0687	-8.8774	4.4855	5.403			0.0687	-0.10387	14.383	1.1508
	0.0688	-8.6828	4.5697	6.746			0.0688	0.45692	14.25	7.0652
	0.0689	-8.7435	4.7482	5.2497			0.0689	0.80421	14.134	12.906
	0.069	-9.025	4.6617	0.20419			0.069	0.88953	14.212	10.117
	0.0691	-9.4759	4.4802	-3.0135			0.0691	0.7211	14.403	-1.3914
	0.0692	-9.9161	4.5694	0.78119			0.0692	0.49216	14.635	-9.5161
	0.0693	-9.9431	4.7695	6.314			0.0693	0.59813	14.547	-7.5038
	0.0694	-10.011	4.9411	4.9653			0.0694	1.0479	14.418	-3.0008
	0.0695	-10.144	4.9407	-2.8164			0.0695	0.95694	14.397	1.3681
	0.0696	-10.103	4.6218	-9.5171			0.0696	0.66714	14.172	5.8983
	0.0697	-10.049	4.5995	-6.2986			0.0697	0.71078	14.288	6.8596
	0.0698	-10.244	4.8569	-0.73502			0.0698	0.89809	14.549	2.9342
	0.0699	-10.343	4.9221	0.33141			0.0699	0.83088	14.595	-4.2065
	0.07	-10.225	4.9662	3.0543			0.07	0.58227	14.551	-9.5028
	0.0701	-10.349	4.8614	5.4175			0.0701	0.59836	14.454	-7.5645
	0.0702	-10.443	4.6366	1.5037			0.0702	0.71251	14.328	-1.7393
	0.0703	-10.129	4.7258	-3.7817			0.0703	0.70078	14.332	4.5654
	0.0704	-10.063	4.6109	-1.0031			0.0704	0.44787	14.304	3.9311
	0.0705	-10.188	4.4366	0.17357			0.0705	0.17641	14.171	-0.58784
	0.0706	-9.9668	4.2246	-3.1041			0.0706	-0.34499	14.185	-1.0906
	0.0707	-9.7129	4.1323	-1.436			0.0707	-0.4725	14.188	0.90399
	0.0708	-9.8287	4.3182	0.4953			0.0708	-0.0087698	14.106	-0.84478
	0.0709	-10.019	4.1331	1.2494			0.0709	-0.085091	13.823	-3.1248
	0.071	-10.048	4.092	3.0956			0.071	-0.30951	13.779	0.24935
	0.0711	-10.062	4.2288	2.9026			0.0711	-0.72373	13.987	2.1144
	0.0712	-9.8564	3.968	-2.5831			0.0712	-0.806	14.053	2.2363
	0.0713	-9.8726	3.6364	-5.1507			0.0713	-0.57332	13.867	2.2504
	0.0714	-10.088	3.472	-1.976			0.0714	-0.85535	13.625	3.0536
	0.0715	-10.04	3.3541	2.331			0.0715	-1.3347	13.599	5.4998
	0.0716	-9.8348	3.4312	5.1362			0.0716	-1.5717	13.506	3.3929
	0.0717	-10.215	3.3481	5.103			0.0717	-1.289	13.523	-2.7459
	0.0718	-10.547	3.2559	-0.52474			0.0718	-1.0684	13.602	-5.2446
	0.0719	-10.203	3.3578	-4.24			0.0719	-1.3133	13.417	-1.7988
	0.072	-10.429	3.1266	-1.1848			0.072	-1.2885	13.336	1.9075
	0.0721	-10.714	2.8315	5.7686			0.0721	-1.2556	13.399	3.2858
	0.0722	-10.827	2.579	9.255			0.0722	-1.4588	13.197	3.0127
	0.0723	-10.885	2.6859	-2.4808			0.0723	-1.1656	13.071	1.097
	0.0724	-11.015	2.9382	-11.93			0.0724	-0.65086	13.057	-0.41781
	0.0725	-11.079	3.0993	-8.5781			0.0725	-1.0458	13.366	-3.0938
	0.0726	-10.972	2.9548	-4.6144			0.0726	-1.1086	13.492	-6.9178
	0.0727	-11.039	2.582	0.16797			0.0727	-0.60665	13.076	-7.873
	0.0728	-11.012	2.9812	2.4202			0.0728	-0.52132	12.988	-4.7472
	0.0729	-11.24	3.2635	1.7526			0.0729	-0.2842	13.199	0.98939
	0.073	-11.512	3.0957	5.495			0.073	-0.11543	13.348	5.4684
	0.0731	-11.538	2.9753	10.138			0.0731	-0.062039	13.15	5.9325
	0.0732	-11.579	3.0038	8.7355			0.0732	-0.35632	12.912	3.4845
	0.0733	-11.456	3.16	0.48305			0.0733	-0.35982	12.795	-0.9291
	0.0734	-11.1	3.3261	-10.603			0.0734	0.32381	12.853	-3.7321
	0.0735	-11.187	3.4607	-11.965			0.0735	0.69044	12.919	-2.3316
	0.0736	-11.535	3.3872	-1.8292			0.0736	0.60894	12.775	2.4569
	0.0737	-11.702	3.1583	7.3442			0.0737	0.46822	12.694	5.0411
	0.0738	-11.789	3.0865	8.0413			0.0738	0.46595	12.506	1.5914
	0.0739	-11.422	3.2421	2.7746			0.0739	0.87162	12.363	-6.8843
	0.074	-11.228	3.5772	-4.5314			0.074	1.1825	12.248	-10.978
	0.0741	-11.324	3.6891	-6.616			0.0741	1.2795	12.213	-7.7402
	0.0742	-11.829	3.4922	-2.9038			0.0742	1.2704	12.308	-1.71
	0.0743	-11.904	3.2203	-2.4659			0.0743	1.5654	11.972	2.9737
	0.0744	-11.475	2.9088	-5.9789			0.0744	1.4679	11.742	5.5655
	0.0745	-11.715	2.9146	-1.7402			0.0745	1.1786	11.623	7.2719
	0.0746	-11.798	3.1052	4.163			0.0746	1.4004	11.543	9.2227
	0.0747	-11.66	3.053	3.8785			0.0747	1.4508	11.504	6.8113
	0.0748	-11.785	2.9135	4.9056			0.0748	1.3991	11.127	-2.2181
	0.0749	-12.001	2.5762	6.5035			0.0749	1.3077	10.929	-8.3483
	0.075	-11.938	2.236	2.2732			0.075	1.3852	10.595	-1.6381
	0.0751	-12.136	2.1334	-4.4308			0.0751	1.2862	10.138	6.0278
	0.0752	-12.638	2.0853	-6.5164			0.0752	1.2309	10.048	1.1208
	0.0753	-12.643	1.9553	-1.4297			0.0753	1.3406	10.187	-5.3544
	0.0754	-12.283	1.631	3.5316			0.0754	0.96094	10.228	-3.7773
	0.0755	-12.416	1.7502	0.19902			0.0755	0.48644	10.197	-0.10047
	0.0756	-12.799	1.7825	-2.8482			0.0756	0.51585	9.9654	0.90948
	0.0757	-12.879	1.6473	-1.3204			0.0757	0.74712	9.6437	2.6317
	0.0758	-13.085	1.3802	-0.10066			0.0758	0.67527	9.5286	4.5807
	0.0759	-13.105	1.1877	-0.67009			0.0759	0.2861	9.4585	0.76472
	0.076	-13.22	1.3344	1.7558			0.076	0.11621	9.6939	-3.3471
	0.0761	-13.656	1.3673	7.4006			0.0761	0.1469	9.7453	-1.0227
	0.0762	-13.688	1.3283	6.6172			0.0762	-0.15945	9.9003	1.305
	0.0763	-13.781	1.1506	1.8026			0.0763	-0.41849	9.9581	2.7398
	0.0764	-13.85	1.384	-1.4127			0.0764	-0.52803	9.8124	2.4407
	0.0765	-13.762	1.6262	-1.546			0.0765	-0.56266	9.8346	1.4549
	0.0766	-13.992	1.6156	-1.5951			0.0766	-0.68079	9.8536	1.4564
	0.0767	-14.067	1.4687	-6.8545			0.0767	-0.86208	10.263	-1.3604
	0.0768	-14.151	1.5263	-9.5455			0.0768	-0.74386	10.358	-2.4191
	0.0769	-14.477	2.1261	-3.0336			0.0769	-1.0172	10.236	-1.4408
	0.077	-14.492	2.2879	3.9708			0.077	-1.2907	10.515	-3.593
	0.0771	-14.324	2.2968	4.8241			0.0771	-1.382	10.822	-4.2793
	0.0772	-14.453	2.2823	0.15894			0.0772	-1.0858	11.024	1.6095
	0.0773	-14.862	2.3092	-0.57796			0.0773	-0.9874	11.226	5.152
	0.0774	-15.123	2.6833	1.7317			0.0774	-1.3591	11.26	1.6482
	0.0775	-15.18	2.9629	1.8664			0.0775	-1.0847	11.082	-2.6582
	0.0776	-15.228	3.0785	3.738			0.0776	-1.3212	11.228	-4.619
	0.0777	-15.264	3.1489	7.6983			0.0777	-1.7459	11.635	-4.3799
	0.0778	-15.562	3.1891	8.6447			0.0778	-1.5274	11.749	-0.72856
	0.0779	-15.971	3.2887	1.8262			0.0779	-1.3012	11.655	2.0236
	0.078	-16.133	3.38	-4.6718			0.078	-1.5098	11.549	1.4727
	0.0781	-16.03	3.6016	-5.1255			0.0781	-1.5108	11.724	2.7051
	0.0782	-16.36	3.5891	-6.3226			0.0782	-1.2434	11.8	6.5509
	0.0783	-16.915	3.3686	-8.992			0.0783	-1.5003	11.521	5.7916
	0.0784	-17.218	3.6856	-7.6656			0.0784	-1.6408	11.573	-0.38356
	0.0785	-17.206	4.1106	-2.7326			0.0785	-1.6703	11.54	-6.4481
	0.0786	-17.396	4.063	1.7751			0.0786	-1.889	11.473	-7.1447
	0.0787	-17.859	4.0184	4.134			0.0787	-1.8225	11.476	-1.7267
	0.0788	-18.327	4.2273	2.3732			0.0788	-1.7383	11.181	5.0885
	0.0789	-19.162	4.3306	-0.71433			0.0789	-1.6757	10.951	6.3003
	0.079	-19.844	4.2663	0.26804			0.079	-1.2931	10.695	-0.3161
	0.0791	-20.143	4.2875	2.8626			0.0791	-1.5436	10.61	-6.2545
	0.0792	-20.645	4.5884	3.127			0.0792	-1.8276	10.603	-6.8714
	0.0793	-21.229	4.7	0.12774			0.0793	-1.475	10.251	-2.6706
	0.0794	-21.767	4.7107	1.0723			0.0794	-1.4383	9.9471	2.5624
	0.0795	-22.256	4.7768	0.58336			0.0795	-1.4936	9.6729	5.55
	0.0796	-22.837	4.8569	-4.5791			0.0796	-1.2913	9.3136	6.196
	0.0797	-23.634	4.8057	-4.9915			0.0797	-1.1254	9.1198	1.732
	0.0798	-24.025	4.9333	-2.5788			0.0798	-1.0023	8.9901	-6.1976
	0.0799	-24.338	5.3499	-3.2983			0.0799	-0.69406	8.6687	-8.8158
	0.08	-24.798	5.5031	-2.6796			0.08	-0.45014	8.1687	-5.5602
	0.0801	-25.131	5.3157	3.6165			0.0801	-0.65756	7.8667	-3.315
	0.0802	-25.398	5.2787	8.8198			0.0802	-0.51024	7.5589	-2.0418
	0.0803	-25.896	5.7247	5.4443			0.0803	-0.34538	7.4689	0.4776
	0.0804	-26.429	5.8262	1.4334			0.0804	-0.24804	7.3411	5.9717
	0.0805	-26.855	5.9352	0.72635			0.0805	-0.010355	6.9853	11.422
	0.0806	-27.13	6.3509	-3.1435			0.0806	-0.27691	6.6612	5.0499
	0.0807	-27.225	6.362	-6.5084			0.0807	0.11444	6.3569	-3.4067
	0.0808	-27.516	6.274	-7.6131			0.0808	0.7544	6.3829	-4.3377
	0.0809	-28.161	6.659	-1.9976			0.0809	0.79863	6.482	1.8293
	0.081	-28.48	6.9021	8.0126			0.081	0.58389	6.2119	3.6803
	0.0811	-28.549	6.6535	14.624			0.0811	0.33096	5.9028	1.5343
	0.0812	-28.872	6.8195	14.975			0.0812	0.41023	5.9019	1.1584
	0.0813	-28.776	7.2112	8.0265			0.0813	0.38336	5.8419	1.4888
	0.0814	-28.763	7.2579	-2.2909			0.0814	0.69495	6.093	-0.74103
	0.0815	-29.203	7.3154	-9.524			0.0815	0.97672	6.3731	-1.0122
	0.0816	-29.154	7.2156	-9.673			0.0816	0.48115	6.2755	-0.12511
	0.0817	-28.946	7.1673	-8.305			0.0817	-0.024923	6.0308	-0.94522
	0.0818	-29.037	7.2782	-7.2253			0.0818	-0.15443	5.9327	-1.1019
	0.0819	-29.359	7.2847	-0.58354			0.0819	0.15367	6.1029	0.51348
	0.082	-29.283	7.4128	5.0505			0.082	0.38147	6.2289	0.71468
	0.0821	-29.094	7.3677	5.5629			0.0821	-0.11646	6.3774	-0.71331
	0.0822	-29.117	7.2616	0.32964			0.0822	-0.56483	6.647	-2.3833
	0.0823	-29.258	7.2852	-5.4147			0.0823	-0.35591	6.6479	-2.1076
	0.0824	-29.379	7.4358	-4.6385			0.0824	-0.40677	6.7319	2.085
	0.0825	-29.396	7.2793	-2.5674			0.0825	-0.6412	6.9288	4.9977
	0.0826	-29.328	6.9082	-1.1914			0.0826	-0.64825	6.7277	3.2068
	0.0827	-29.143	6.8891	2.1741			0.0827	-0.84956	6.9368	-3.1509
	0.0828	-29.192	7.0281	3.3392			0.0828	-0.82616	7.4092	-7.2152
	0.0829	-29.266	7.0647	1.8682			0.0829	-1.0128	7.456	-0.19448
	0.083	-29.23	6.8469	3.6657			0.083	-1.6639	7.5673	4.2303
	0.0831	-29.127	6.7631	7.2773			0.0831	-1.8821	7.5865	-1.0119
	0.0832	-28.931	6.8742	4.7663			0.0832	-1.5985	7.6783	-5.2201
	0.0833	-28.678	6.6928	-2.0125			0.0833	-1.706	8.2818	-4.0723
	0.0834	-28.563	6.3716	-2.5778			0.0834	-2.0913	8.2994	0.94302
	0.0835	-28.668	6.483	1.5077			0.0835	-1.7553	7.96	4.7266
	0.0836	-28.797	6.6159	0.72873			0.0836	-1.478	7.9774	3.4488
	0.0837	-28.932	6.5307	-3.6924			0.0837	-1.6368	8.3548	-0.81101
	0.0838	-29.016	6.4833	-2.5629			0.0838	-1.9553	8.4815	-2.519
	0.0839	-28.827	6.4564	-2.611			0.0839	-2.0786	8.4049	0.10305
	0.084	-29.097	6.6698	-4.305			0.084	-1.8568	8.5285	2.4822
	0.0841	-29.522	6.8772	-2.5154			0.0841	-1.1776	8.6998	4.1914
	0.0842	-29.51	6.5873	-0.52629			0.0842	-0.78221	8.8493	1.9804
	0.0843	-29.658	6.3922	-0.29148			0.0843	-1.2192	8.784	-3.8838
	0.0844	-30.132	6.5854	-2.5943			0.0844	-1.1274	8.753	-4.0882
	0.0845	-30.564	6.5785	-2.9523			0.0845	-0.95905	8.912	-1.4928
	0.0846	-30.596	6.6126	0.013125			0.0846	-0.6748	9.0303	-2.3749
	0.0847	-30.94	6.7049	4.1214			0.0847	-0.28017	9.0556	-5.0052
	0.0848	-31.51	6.5934	7.7419			0.0848	-0.61204	9.247	-3.0474
	0.0849	-31.689	6.5233	3.9647			0.0849	-0.59025	9.2824	1.1793
	0.085	-32.03	6.4709	-3.2299			0.085	-0.13341	9.2007	4.1164
	0.0851	-32.493	6.3697	-5.915			0.0851	0.17288	9.1843	3.9038
	0.0852	-32.865	6.1304	-2.4663			0.0852	0.52644	9.1875	0.95878
	0.0853	-33.282	6.171	0.68948			0.0853	0.88044	9.2475	-2.0607
	0.0854	-33.792	6.3342	0.76752			0.0854	0.76506	9.468	-2.1993
	0.0855	-34.432	6.2842	-0.02267			0.0855	0.54438	9.4409	2.3762
	0.0856	-34.997	6.1546	2.5885			0.0856	0.64466	9.2973	7.3774
	0.0857	-35.154	5.6593	6.5587			0.0857	0.77342	9.323	5.9828
	0.0858	-35.434	5.5425	4			0.0858	0.79963	9.5226	1.5929
	0.0859	-36.033	5.5439	-0.86112			0.0859	0.997	9.6571	0.073727
	0.086	-36.322	5.5716	1.91			0.086	1.1572	9.659	-2.6747
	0.0861	-36.681	5.5403	4.8109			0.0861	1.241	9.932	-5.4742
	0.0862	-37.292	4.9937	-1.4568			0.0862	1.1723	9.8905	-3.9353
	0.0863	-37.442	4.8197	-8.4174			0.0863	0.97307	9.7158	-3.7799
	0.0864	-37.553	5.0939	-8.9579			0.0864	0.69817	9.7917	-1.8235
	0.0865	-37.806	5.1871	-4.972			0.0865	0.76027	9.916	4.6351
	0.0866	-37.85	4.8638	-1.528			0.0866	1.1598	10.196	8.9571
	0.0867	-38.125	4.4408	0.72109			0.0867	1.104	10.102	7.1541
	0.0868	-38.381	4.5922	1.8221			0.0868	1.0074	10.141	-0.24647
	0.0869	-38.428	4.8126	2.3147			0.0869	0.81604	10.495	-3.738
	0.087	-38.616	4.8115	-1.1161			0.087	0.78796	10.598	-3.8342
	0.0871	-38.439	4.879	-1.171			0.0871	1.1588	10.488	-6.9656
	0.0872	-37.94	4.9839	5.3663			0.0872	1.1664	10.264	-5.7303
	0.0873	-37.813	5.0447	5.3633			0.0873	1.0583	10.229	-1.1031
	0.0874	-38.053	5.0918	-0.879			0.0874	0.87575	10.339	2.3689
	0.0875	-37.948	5.2727	-4.0464			0.0875	1.09	10.505	1.8338
	0.0876	-37.385	5.3408	-3.0037			0.0876	1.6056	10.805	-0.72725
	0.0877	-36.742	5.6611	-1.4409			0.0877	1.635	10.926	-1.8659
	0.0878	-36.416	6.1558	-3.1425			0.0878	1.5667	10.758	-3.5117
	0.0879	-36.475	6.3353	-3.4218			0.0879	1.7281	10.699	-1.6734
	0.088	-36.116	6.3376	1.9567			0.088	1.8042	10.648	5.7459
	0.0881	-35.585	6.6152	2.3368			0.0881	1.924	10.583	11.602
	0.0882	-35.376	7.0588	1.6349			0.0882	2.0713	10.959	9.1851
	0.0883	-34.915	7.3684	9.9577			0.0883	2.2096	11.276	1.5957
	0.0884	-34.085	7.5358	15.309			0.0884	2.3198	11.141	-5.9612
	0.0885	-33.77	7.9038	8.384			0.0885	2.1058	11.173	-10.65
	0.0886	-33.564	8.2539	-0.37865			0.0886	2.5436	11.264	-7.0438
	0.0887	-33.322	8.4669	-5.3388			0.0887	2.6053	11.188	0.16577
	0.0888	-33.038	8.5732	-7.2912			0.0888	2.0874	11.276	7.6577
	0.0889	-32.306	8.6405	-7.9083			0.0889	2.5371	11.531	9.0172
	0.089	-31.463	8.9061	-6.4247			0.089	2.8769	11.496	4.8135
	0.0891	-31.31	9.0268	-0.82514			0.0891	2.0125	11.372	4.648
	0.0892	-31.24	9.1384	3.4995			0.0892	2.1487	11.485	3.3655
	0.0893	-30.656	9.3422	2.9202			0.0893	2.5723	11.543	-6.1154
	0.0894	-29.864	9.5017	2.3476			0.0894	2.016	11.559	-12.289
	0.0895	-29.791	9.2988	-0.33434			0.0895	1.8922	11.786	-10.338
	0.0896	-30.418	9.1703	-2.1289			0.0896	1.9237	12.122	-1.4362
	0.0897	-30.043	9.1884	-0.22495			0.0897	2.0946	12.115	6.4407
	0.0898	-29.664	9.0662	-0.57486			0.0898	2.0282	12.076	6.8001
	0.0899	-29.451	9.1942	-4.1247			0.0899	1.5567	12.166	-1.2809
	0.09	-28.844	9.1821	-4.0779			0.09	0.99114	12.33	-6.6704
	0.0901	-28.712	8.7805	-1.1752			0.0901	0.98875	12.409	-4.9587
	0.0902	-29.087	8.5668	0.71939			0.0902	1.1204	12.42	-1.2059
	0.0903	-29.207	8.519	1.4246			0.0903	1.0287	12.548	1.3664
	0.0904	-28.566	8.2719	4.3981			0.0904	1.1111	12.544	1.5751
	0.0905	-27.902	8.1589	4.1668			0.0905	0.88423	12.818	2.8862
	0.0906	-28.04	8.1979	1.4762			0.0906	0.45253	13.013	5.1867
	0.0907	-28.461	7.9044	0.099685			0.0907	0.67654	12.824	5.266
	0.0908	-28.541	7.7081	-2.1449			0.0908	0.95642	12.989	2.8822
	0.0909	-28.291	7.7998	-2.0788			0.0909	0.90246	13.138	0.30082
	0.091	-28.223	7.7613	-2.195			0.091	0.76362	13.072	-3.4472
	0.0911	-28.223	7.6237	-0.80493			0.0911	0.96194	13.217	-4.9481
	0.0912	-28.567	7.5265	0.90452			0.0912	1.1185	13.372	-3.6234
	0.0913	-28.974	7.752	1.9228			0.0913	0.78644	13.408	-2.9819
	0.0914	-28.939	7.5952	1.2901			0.0914	1.5182	13.801	-3.5043
	0.0915	-28.821	7.5684	-0.12627			0.0915	2.249	13.898	-1.1555
	0.0916	-29.009	7.9559	1.221			0.0916	1.9132	13.684	3.6165
	0.0917	-29.518	8.0782	1.8936			0.0917	1.6607	13.684	2.6728
	0.0918	-29.697	7.8855	2.0467			0.0918	1.8682	13.746	-2.9682
	0.0919	-29.543	7.8404	2.2603			0.0919	2.4723	13.92	-5.6686
	0.092	-29.534	8.3099	-0.2563			0.092	3.1447	14.142	0.37572
	0.0921	-29.959	8.6494	-4.7086			0.0921	3.1941	14.188	7.5207
	0.0922	-30.193	8.8949	-6.9222			0.0922	3.313	14.174	6.6695
	0.0923	-30.352	9.0898	-5.1505			0.0923	3.751	14.248	3.6918
	0.0924	-30.954	9.1347	-0.91682			0.0924	3.8561	14.045	2.7731
	0.0925	-30.993	9.3757	4.5618			0.0925	4.3081	14.018	-0.63903
	0.0926	-30.803	9.6486	7.271			0.0926	4.7497	14.377	-4.8767
	0.0927	-31.368	9.8294	4.6505			0.0927	4.4226	14.48	-3.7606
	0.0928	-31.953	10.124	-1.8171			0.0928	4.3732	14.316	-1.9822
	0.0929	-32.084	10.315	-7.0322			0.0929	4.9073	14.4	-0.22604
	0.093	-31.954	10.299	-2.9083			0.093	5.0727	14.457	4.4123
	0.0931	-32.148	10.572	2.2398			0.0931	5.4272	14.486	6.4113
	0.0932	-32.587	10.808	-0.67154			0.0932	5.092	14.462	0.89305
	0.0933	-32.616	10.769	-0.76179			0.0933	4.5422	14.257	-2.463
	0.0934	-32.766	10.736	2.3244			0.0934	4.9285	14.307	0.60889
	0.0935	-32.955	10.957	3.9264			0.0935	4.7281	14.365	2.5498
	0.0936	-32.991	11.335	2.549			0.0936	4.6352	14.383	-3.7483
	0.0937	-33.037	11.211	2.0157			0.0937	4.8087	14.551	-6.6587
	0.0938	-32.894	10.948	1.7815			0.0938	4.7183	14.527	-3.419
	0.0939	-32.993	11.013	-4.0765			0.0939	4.5635	14.307	0.67387
	0.094	-33.092	11.304	-8.7007			0.094	4.2759	14.135	2.2418
	0.0941	-32.846	11.175	-5.0784			0.0941	4.2372	14.219	1.431
	0.0942	-32.867	10.897	1.6039			0.0942	4.1721	14.382	-1.7154
	0.0943	-32.857	10.884	5.45			0.0943	3.7279	14.386	-3.8452
	0.0944	-32.748	10.892	5.4989			0.0944	3.6866	14.286	-0.82151
	0.0945	-32.973	10.904	1.9357			0.0945	3.9248	14.433	1.5491
	0.0946	-33.069	10.85	-2.066			0.0946	3.5797	14.466	-0.87043
	0.0947	-32.973	10.656	-6.0394			0.0947	3.3613	14.299	-2.6879
	0.0948	-32.758	10.521	-8.3596			0.0948	3.5446	14.416	2.4044
	0.0949	-32.762	10.473	-4.0143			0.0949	3.4007	14.504	11.967
	0.095	-32.901	10.33	3.3498			0.095	3.1959	14.243	8.9384
	0.0951	-32.852	10.573	4.3111			0.0951	2.9174	14.312	-3.4538
	0.0952	-32.922	10.579	-0.22881			0.0952	2.8095	14.463	-11.659
	0.0953	-33.172	10.455	-2.6261			0.0953	2.9669	14.432	-12.607
	0.0954	-33.146	10.709	1.5521			0.0954	2.7905	14.36	-5.4004
	0.0955	-32.885	10.66	7.789			0.0955	2.7856	14.563	3.7792
	0.0956	-32.793	10.46	5.9378			0.0956	2.8436	14.738	5.8504
	0.0957	-32.725	10.194	-3.2145			0.0957	2.6561	14.597	4.1266
	0.0958	-32.839	10.279	-6.7268			0.0958	2.5414	14.643	2.3427
	0.0959	-33.037	10.498	-3.56			0.0959	2.3545	14.563	0.46869
	0.096	-33.151	10.476	-1.9785			0.096	2.3419	14.543	0.72949
	0.0961	-33.16	10.553	0.49187			0.0961	2.4487	14.762	5.3467
	0.0962	-33.143	10.428	7.4248			0.0962	2.3165	14.868	3.4317
	0.0963	-32.956	10.397	10.67			0.0963	2.0154	14.708	-2.7677
	0.0964	-32.853	10.458	5.214			0.0964	1.863	14.65	-4.1301
	0.0965	-33.212	10.379	-1.4821			0.0965	1.8889	14.76	-1.3601
	0.0966	-33.295	10.158	-3.7071			0.0966	1.6555	14.617	0.48234
	0.0967	-33.236	10.471	-2.8785			0.0967	1.0877	14.338	0.26684
	0.0968	-33.184	10.791	-4.0963			0.0968	0.54989	14.181	-1.1174
	0.0969	-33.193	10.455	-4.2707			0.0969	0.31807	14.215	-4.0468
	0.097	-33.441	10.277	-3.6267			0.097	0.084257	14.393	-6.8239
	0.0971	-33.423	10.093	-5.5742			0.0971	-0.40321	14.379	-3.9528
	0.0972	-32.982	10.115	-4.2853			0.0972	-0.89654	14.166	4.5271
	0.0973	-32.97	9.9563	2.1223			0.0973	-1.5938	14.019	9.2657
	0.0974	-33.117	9.8912	2.2765			0.0974	-2.0198	14.111	3.1477
	0.0975	-33.215	9.8642	0.79495			0.0975	-2.2393	14.051	-0.88136
	0.0976	-33.467	9.5438	5.0504			0.0976	-2.583	13.588	4.6326
	0.0977	-33.566	9.3426	9.2211			0.0977	-2.7393	13.47	11.052
	0.0978	-33.495	8.9808	4.2587			0.0978	-2.9427	13.714	6.4584
	0.0979	-33.128	8.8731	-2.5314			0.0979	-3.5847	13.623	-6.5889
	0.098	-33.075	8.8441	-1.8754			0.098	-4.0462	13.419	-9.7677
	0.0981	-33.324	8.3871	1.8669			0.0981	-4.0359	13.116	-4.0556
	0.0982	-33.515	8.1987	3.3296			0.0982	-4.29	12.979	-2.3659
	0.0983	-33.406	8.2319	-0.53624			0.0983	-4.7477	13.118	-4.0649
	0.0984	-33.417	7.9589	-6.5227			0.0984	-5.0081	12.996	-2.89
	0.0985	-33.899	7.4943	-3.1675			0.0985	-5.0131	12.976	0.23128
	0.0986	-33.88	7.2943	4.4825			0.0986	-4.9912	13.098	-0.86635
	0.0987	-33.89	7.2233	4.7444			0.0987	-5.0631	12.753	-0.55695
	0.0988	-34.215	7.0653	1.2548			0.0988	-5.2443	12.551	3.0154
	0.0989	-33.846	6.8939	-2.162			0.0989	-5.31	12.921	2.9391
	0.099	-33.87	6.7534	-3.9111			0.099	-5.2874	12.941	0.25865
	0.0991	-34.738	6.5124	-1.7281			0.0991	-4.8657	12.731	-2.0117
	0.0992	-34.913	6.4222	-1.7436			0.0992	-4.3788	12.726	-0.96774
	0.0993	-34.593	6.542	-3.3764			0.0993	-3.8893	12.768	1.5128
	0.0994	-34.573	6.5926	-0.93146			0.0994	-3.5574	12.781	-3.2462
	0.0995	-34.816	6.2047	0.75241			0.0995	-3.7285	12.818	-3.3694
	0.0996	-35.166	5.7431	0.82548			0.0996	-3.1485	12.697	3.8171
	0.0997	-34.884	5.5167	-0.10828			0.0997	-2.3874	12.598	9.0058
	0.0998	-34.633	5.574	-1.581			0.0998	-2.2943	12.696	7.6701
	0.0999	-35.163	5.9439	-1.3522			0.0999	-2.099	12.817	1.9113
	0.1	-35.207	5.7915	0.31723			0.1	-1.6965	12.847	-4.2884
	0.1001	-35.436	5.4158	-0.2535			0.1001	-1.3942	12.902	-7.3819
	0.1002	-35.539	5.3339	-0.087874			0.1002	-1.2811	12.937	-4.4294
	0.1003	-34.976	5.2597	1.2447			0.1003	-1.2209	13.024	-0.22121
	0.1004	-34.825	5.286	2.5891			0.1004	-0.89319	12.96	0.44216
	0.1005	-34.724	5.1529	2.7759			0.1005	-0.6257	12.786	-0.60411
	0.1006	-35.051	5.1135	4.371			0.1006	-0.53324	12.777	-0.86707
	0.1007	-35.405	5.5228	4.7649			0.1007	-0.08386	12.748	-2.0368
	0.1008	-35.069	5.4904	4.1226			0.1008	0.0039822	12.872	-0.38764
	0.1009	-34.646	5.2114	0.20108			0.1009	-0.44727	12.836	3.162
	0.101	-34.263	5.2106	-5.5173			0.101	-0.63342	12.502	3.0756
	0.1011	-34.078	5.2078	-7.475			0.1011	-0.1675	12.414	0.30151
	0.1012	-34.197	5.171	-4.3907			0.1012	0.26354	12.383	-0.24358
	0.1013	-34.138	5.0552	-0.62382			0.1013	-0.12285	12.28	1.5863
	0.1014	-34.107	5.0152	1.7255			0.1014	-0.73501	12.321	2.5095
	0.1015	-34.058	4.9619	-0.081172			0.1015	-0.80424	12.29	0.87642
	0.1016	-33.726	4.847	-3.6362			0.1016	-1.039	11.975	-1.803
	0.1017	-33.837	5.0062	-1.135			0.1017	-1.2277	11.737	-1.1558
	0.1018	-33.969	4.7574	3.4915			0.1018	-1.3088	11.956	-0.84434
	0.1019	-33.828	4.7815	4.9714			0.1019	-1.7041	12.174	-6.5021
	0.102	-33.914	5.1268	6.1034			0.102	-1.92	12.133	-7.391
	0.1021	-34.066	5.1073	7.0967			0.1021	-2.2142	11.717	-0.087207
	0.1022	-34.478	5.1451	0.76859			0.1022	-2.1556	11.459	3.6077
	0.1023	-34.689	5.1275	-7.9668			0.1023	-2.1272	11.497	2.6743
	0.1024	-34.816	4.9575	-8.5406			0.1024	-2.4088	11.746	5.3104
	0.1025	-35.373	5.2124	-5.0129			0.1025	-2.6235	11.761	7.5807
	0.1026	-35.854	5.5982	-4.9312			0.1026	-2.6195	11.548	5.8024
	0.1027	-36.049	5.5634	-4.3238			0.1027	-2.1751	11.596	-0.57975
	0.1028	-36.391	5.3703	-0.89149			0.1028	-1.9084	11.601	-8.4512
	0.1029	-37.072	5.3227	1.5425			0.1029	-2.3335	11.451	-11.177
	0.103	-37.669	5.3183	4.9197			0.103	-2.6534	11.53	-7.5831
	0.1031	-38.343	5.6071	9.415			0.1031	-2.4393	11.681	-1.4131
	0.1032	-39.11	5.909	8.0699			0.1032	-1.965	11.708	2.9055
	0.1033	-39.596	5.782	2.695			0.1033	-1.3778	11.698	5.6051
	0.1034	-40.326	5.9101	-1.0022			0.1034	-1.3305	11.629	6.8441
	0.1035	-40.907	5.8853	-1.7108			0.1035	-1.5125	11.855	6.1257
	0.1036	-41.255	6.0016	-0.059498			0.1036	-1.2025	12.078	1.7446
	0.1037	-42.047	6.2492	-0.21299			0.1037	-0.72069	12.012	-2.472
	0.1038	-42.592	6.2142	-3.5129			0.1038	-0.56562	11.987	-3.3011
	0.1039	-43.068	6.3347	-5.5878			0.1039	-0.40408	12.025	-3.6117
	0.104	-43.739	6.502	-0.77649			0.104	0.27638	12.019	-0.46325
	0.1041	-43.995	6.7486	2.3424			0.1041	0.9012	12.105	5.0196
	0.1042	-44.33	6.9563	0.33481			0.1042	1.0908	12.093	4.3157
	0.1043	-44.857	6.8697	-1.7007			0.1043	1.3324	12.044	-2.9138
	0.1044	-45.178	6.6804	-0.87963			0.1044	1.525	12.08	-3.8922
	0.1045	-45.475	6.6312	0.32289			0.1045	1.6524	12.037	2.4382
	0.1046	-45.513	6.9593	-0.064559			0.1046	1.7382	11.915	3.9546
	0.1047	-45.563	7.2198	2.578			0.1047	1.8238	12.013	0.91374
	0.1048	-45.856	7.2437	5.6385			0.1048	2.1272	11.976	0.84595
	0.1049	-45.812	6.9836	4.6468			0.1049	2.3429	11.772	3.7184
	0.105	-45.79	6.7686	1.0156			0.105	2.3295	11.716	4.1674
	0.1051	-45.928	6.9852	-0.75103			0.1051	2.5244	11.627	1.598
	0.1052	-46.155	6.7927	-2.9597			0.1052	2.0825	11.461	0.74787
	0.1053	-46.091	6.6241	-3.6123			0.1053	1.9302	11.505	1.0741
	0.1054	-45.664	6.8927	-4.6864			0.1054	2.3811	11.541	-3.5714
	0.1055	-45.776	6.8115	-5.1096			0.1055	2.3589	11.176	-9.5188
	0.1056	-45.878	6.3366	1.2638			0.1056	2.5135	11.164	-7.2017
	0.1057	-45.394	6.2305	7.5985			0.1057	1.9848	11.321	-4.5501
	0.1058	-45.221	6.5244	4.3798			0.1058	1.5752	11.029	-4.8506
	0.1059	-45.078	6.3555	-3.3245			0.1059	1.7985	10.682	-3.1597
	0.106	-45.02	5.8059	-6.1423			0.106	1.3471	10.529	0.88014
	0.1061	-45.355	5.6774	-2.6682			0.1061	1.1193	10.519	7.4668
	0.1062	-45.193	5.8351	-0.77772			0.1062	1.4019	10.585	10.144
	0.1063	-44.801	5.9077	-0.01523			0.1063	1.2492	10.522	3.9669
	0.1064	-44.818	5.8106	3.5992			0.1064	1.0768	10.319	-0.57309
	0.1065	-45.306	5.6288	1.8863			0.1065	0.71292	10.231	-1.8866
	0.1066	-45.231	5.8159	-1.0629			0.1066	0.46661	10.234	-3.3447
	0.1067	-45.123	5.7849	3.5767			0.1067	0.88932	10.201	-1.7924
	0.1068	-45.526	5.5803	6.2559			0.1068	0.91882	10.047	-1.6232
	0.1069	-45.81	5.6944	3.9043			0.1069	0.36778	9.7093	-3.0608
	0.107	-45.723	5.6362	2.9149			0.107	0.48029	9.7332	-2.9515
	0.1071	-45.745	5.8264	4.5238			0.1071	0.89724	9.9467	2.0983
	0.1072	-46.058	6.2028	6.238			0.1072	0.47952	9.8863	5.2564
	0.1073	-46.195	6.4168	3.9069			0.1073	0.76376	9.8639	5.1202
	0.1074	-46.328	6.5658	3.0664			0.1074	1.1291	9.7127	4.4798
	0.1075	-46.45	6.5566	6.4749			0.1075	0.62372	9.4324	1.7161
	0.1076	-46.59	6.756	10.213			0.1076	0.62169	9.2201	-0.57799
	0.1077	-46.849	6.9669	2.2468			0.1077	0.79788	9.2721	-2.8204
	0.1078	-47.269	7.1218	-28.996			0.1078	0.75555	9.6818	-5.6367
	0.1079	-47.252	7.4452	-69.083			0.1079	0.90538	9.5174	-5.5307
	0.108	-47.294	7.9565	-76.663			0.108	0.9752	9.0792	-2.0878
	0.1081	-47.643	8.4531	-24.881			0.1081	0.95417	8.8289	0.53528
	0.1082	-47.966	8.6304	31.848			0.1082	0.97772	8.8031	-2.3999
	0.1083	-48.369	8.6484	52.842			0.1083	0.8634	8.9684	-2.889
	0.1084	-48.645	8.8003	48.682			0.1084	0.89772	8.9975	0.35384
	0.1085	-48.715	9.189	33.102			0.1085	0.85847	8.6984	3.8817
	0.1086	-48.782	9.4866	16.111			0.1086	0.80255	8.3375	2.2424
	0.1087	-48.994	9.7056	1.5591			0.1087	0.68366	8.4773	-3.9363
	0.1088	-49.494	9.9907	-6.531			0.1088	0.62885	8.467	-2.8521
	0.1089	-49.809	10.325	-8.5617			0.1089	0.6572	8.0618	2.3061
	0.109	-49.736	10.343	-10.77			0.109	0.42547	7.8508	5.5366
	0.1091	-50.018	10.295	-9.1047			0.1091	0.16138	7.8925	9.1777
	0.1092	-50.158	10.642	-2.792			0.1092	0.4241	7.6875	10.013
	0.1093	-50.398	10.829	0.44144			0.1093	0.41055	7.5032	3.6454
	0.1094	-50.79	10.742	0.076571			0.1094	0.12764	7.7195	-5.8134
	0.1095	-51.169	10.701	-0.16644			0.1095	-0.053836	7.7092	-7.517
	0.1096	-51.786	10.915	0.42136			0.1096	-0.11372	7.3854	-1.8606
	0.1097	-51.785	11.092	2.4852			0.1097	0.02105	7.2371	4.2765
	0.1098	-52.03	10.888	1.4402			0.1098	-0.18289	7.2061	4.0381
	0.1099	-52.445	10.757	-2.7457			0.1099	-0.33932	7.5042	-2.7116
	0.11	-52.768	10.582	-3.5066			0.11	-0.18291	7.5357	-9.4646
	0.1101	-53.142	10.345	-1.1562			0.1101	-0.3051	7.2501	-7.6716
	0.1102	-53.478	10.377	-0.61372			0.1102	-0.41358	7.3106	-1.7487
	0.1103	-54.013	10.435	0.58073			0.1103	-0.37318	7.3232	0.037944
	0.1104	-54.371	10.348	3.5804			0.1104	-0.55207	7.3882	-1.0194
	0.1105	-54.659	10.036	3.8776			0.1105	-0.41175	7.4541	1.5074
	0.1106	-54.813	9.5645	1.9349			0.1106	-0.012752	7.4398	4.8942
	0.1107	-55.22	9.3908	2.0532			0.1107	-0.063508	7.379	4.2852
	0.1108	-55.879	9.2477	1.6495			0.1108	-0.55216	7.4426	0.95614
	0.1109	-56.041	9.0739	-1.6496			0.1109	-0.58568	7.815	0.35642
	0.111	-55.683	9.0983	-5.1087			0.111	-0.23926	7.8723	5.5513
	0.1111	-55.747	8.8356	-4.7343			0.1111	-0.3306	7.7724	8.956
	0.1112	-56.323	8.4313	-0.1655			0.1112	-0.24379	7.9952	5.0618
	0.1113	-56.598	8.3236	2.5117			0.1113	0.081364	8.0665	-4.4629
	0.1114	-56.727	8.2628	-1.5537			0.1114	-0.29046	8.2222	-14.819
	0.1115	-56.86	8.0548	-7.4065			0.1115	-0.2446	8.4844	-15.758
	0.1116	-56.668	7.9293	-5.0672			0.1116	0.1671	8.4104	-8.5145
	0.1117	-56.549	7.8272	3.8362			0.1117	0.11843	8.5212	-0.98322
	0.1118	-56.697	7.6801	7.89			0.1118	0.17133	8.5623	3.2532
	0.1119	-56.822	7.817	6.5905			0.1119	0.43046	8.3517	6.0718
	0.112	-56.678	8.0674	1.9919			0.112	0.34449	8.383	9.2124
	0.1121	-56.475	7.8563	-2.1196			0.1121	0.19752	8.2667	11.571
	0.1122	-56.616	7.673	-1.0169			0.1122	0.58577	8.1127	4.7332
	0.1123	-56.573	7.8875	2.4278			0.1123	1.0177	8.4374	-7.0201
	0.1124	-56.167	8.0001	3.0114			0.1124	1.1188	8.4005	-8.9364
	0.1125	-56.085	7.9827	0.3467			0.1125	0.82376	8.0671	-3.4101
	0.1126	-56.135	7.9227	-2.8563			0.1126	0.85623	7.9831	0.40781
	0.1127	-56.001	8.0435	-2.5579			0.1127	0.86518	7.9287	1.6494
	0.1128	-55.78	8.2176	-2.8552			0.1128	0.89698	7.8093	0.53605
	0.1129	-55.605	8.1838	-5.9745			0.1129	1.2455	7.7768	0.78951
	0.113	-55.591	8.1842	-3.0323			0.113	1.4161	7.9347	2.7195
	0.1131	-55.652	8.2534	0.93516			0.1131	1.4595	7.9178	1.4236
	0.1132	-55.661	8.2675	-2.5152			0.1132	1.2049	7.697	2.6128
	0.1133	-55.608	8.319	-4.4885			0.1133	1.5702	7.5221	5.188
	0.1134	-55.684	8.272	1.4131			0.1134	1.9594	7.5735	4.0759
	0.1135	-55.798	8.2319	8.0333			0.1135	2.159	7.6061	-1.7616
	0.1136	-55.865	8.2265	7.9338			0.1136	1.9687	7.5482	-5.7348
	0.1137	-55.994	8.0676	3.0479			0.1137	1.5321	7.7254	-5.2997
	0.1138	-56.202	7.9648	-2.1006			0.1138	1.7846	7.8688	-5.2977
	0.1139	-56.525	8.0544	-4.4171			0.1139	2.0578	7.8655	-4.0504
	0.114	-57.088	7.8266	-2.2455			0.114	2.288	8.1916	0.52359
	0.1141	-57.208	7.4908	2.3136			0.1141	2.8881	8.4835	1.958
	0.1142	-57.273	7.5296	4.0834			0.1142	2.8896	8.4745	2.2472
	0.1143	-57.972	7.4838	1.3899			0.1143	2.2384	8.9275	6.1521
	0.1144	-58.52	7.3949	-2.1962			0.1144	2.378	9.5028	8.2774
	0.1145	-58.697	7.3588	-2.003			0.1145	2.6436	10.028	4.1339
	0.1146	-58.769	7.2006	2.4134			0.1146	2.6629	10.619	-0.53986
	0.1147	-59.552	6.9095	-0.17277			0.1147	3.0613	11.147	-1.1545
	0.1148	-59.916	6.9564	-4.5284			0.1148	3.3285	11.699	0.047408
	0.1149	-60.211	7.1113	-1.4789			0.1149	3.1844	12.286	-0.45435
	0.115	-60.626	6.9272	1.8778			0.115	3.0558	13.169	-2.879
	0.1151	-60.886	6.8266	-0.5547			0.1151	3.1498	14.058	-2.8825
	0.1152	-61.479	7.0362	-1.0305			0.1152	3.557	14.869	-4.7113
	0.1153	-61.789	6.9236	1.6996			0.1153	3.4616	15.877	-6.9511
	0.1154	-62.542	6.9627	3.1576			0.1154	3.175	16.989	-6.4482
	0.1155	-63.084	7.063	3.5934			0.1155	3.1335	17.89	-4.4274
	0.1156	-63.378	7.0918	2.5612			0.1156	3.0186	18.467	-2.4966
	0.1157	-63.801	7.3675	-3.2606			0.1157	2.8708	19.484	-0.07373
	0.1158	-64.246	7.4546	-6.2355			0.1158	2.9032	20.595	2.963
	0.1159	-64.781	7.4797	-3.9479			0.1159	2.9368	21.54	6.8472
	0.116	-65.406	7.5341	2.3908			0.116	2.5243	22.473	7.3855
	0.1161	-66.004	7.7917	5.7859			0.1161	2.0209	23.281	5.5963
	0.1162	-66.56	8.084	4.1733			0.1162	1.5553	24.317	2.8038
	0.1163	-66.98	8.2022	5.2821			0.1163	1.6057	25.338	2.7241
	0.1164	-67.25	8.5214	6.1532			0.1164	1.7996	26.121	2.4971
	0.1165	-67.521	8.7375	5.1026			0.1165	1.5992	26.762	-1.7221
	0.1166	-68.098	8.7869	8.4132			0.1166	1.2568	27.486	-3.6301
	0.1167	-68.739	9.1095	12.835			0.1167	0.95933	28.212	-2.7257
	0.1168	-69.099	9.1713	10.604			0.1168	0.51272	29.116	-1.8967
	0.1169	-69.623	9.2174	5.9871			0.1169	0.40955	29.688	-0.65778
	0.117	-70.057	9.3487	-8.0639			0.117	0.35141	29.841	-0.95241
	0.1171	-70.508	9.575	-42.38			0.1171	-0.11895	30.166	-2.5348
	0.1172	-71.286	9.8375	-74.45			0.1172	-0.20021	30.713	-4.8004
	0.1173	-71.595	9.7141	-75.741			0.1173	-0.41019	31.221	-4.2927
	0.1174	-71.479	9.6797	-26.915			0.1174	-0.87131	31.501	3.806
	0.1175	-71.884	9.7008	33.893			0.1175	-1.2451	31.357	10.75
	0.1176	-72.559	9.5158	67.192			0.1176	-1.1548	31.035	7.2246
	0.1177	-72.92	9.3014	60.576			0.1177	-1.2225	31.156	2.1236
	0.1178	-73.367	9.2004	33.152			0.1178	-1.4925	31.326	-0.2408
	0.1179	-73.793	9.1797	9.6031			0.1179	-1.6205	31.09	-2.8393
	0.118	-73.872	9.1517	-2.5734			0.118	-2.1194	30.862	-1.888
	0.1181	-73.819	8.774	-5.2195			0.1181	-2.4139	30.944	-0.69907
	0.1182	-74.117	8.4507	-5.3004			0.1182	-2.2069	30.687	-6.9831
	0.1183	-74.804	8.4683	-8.2324			0.1183	-2.1228	30.321	-10.505
	0.1184	-74.846	8.3625	-8.5705			0.1184	-2.4391	30.178	-4.0475
	0.1185	-74.75	8.0845	-2.0547			0.1185	-2.8555	29.902	3.6966
	0.1186	-74.997	7.6077	4.266			0.1186	-3.0925	29.727	6.0474
	0.1187	-75.263	7.3679	-0.010218			0.1187	-3.0991	29.421	1.6142
	0.1188	-75.651	7.2811	-8.7446			0.1188	-3.4555	28.952	-2.2607
	0.1189	-75.919	6.9996	-10.46			0.1189	-3.7349	28.827	-3.4561
	0.119	-75.784	6.7451	-3.8539			0.119	-3.6848	28.877	-1.67
	0.1191	-75.86	6.669	2.6524			0.1191	-3.8287	28.674	2.4223
	0.1192	-76.368	6.6447	2.9			0.1192	-4.3539	28.146	2.7576
	0.1193	-76.681	6.5317	0.10122			0.1193	-4.5582	27.83	0.16757
	0.1194	-77.046	6.1451	-2.316			0.1194	-4.4345	27.877	-0.10394
	0.1195	-77.13	5.795	-1.4836			0.1195	-4.3315	27.832	1.8843
	0.1196	-77.367	6.0371	2.0176			0.1196	-4.3397	27.563	2.0843
	0.1197	-77.838	6.2174	2.8995			0.1197	-4.6478	27.374	-1.3372
	0.1198	-78.263	6.0321	3.5115			0.1198	-4.9325	27.134	0.83742
	0.1199	-78.811	5.9042	7.0707			0.1199	-5.3469	27.009	8.2154
	0.12	-79.258	6.0477	4.8398			0.12	-5.4637	27.108	8.5046
	0.1201	-79.915	6.1949	-1.2268			0.1201	-5.6045	27.272	3.1426
	0.1202	-80.615	6.2793	-1.7108			0.1202	-5.9196	27.301	-0.71901
	0.1203	-81.469	6.3232	-2.8659			0.1203	-6.0574	26.944	-4.7242
	0.1204	-82.01	6.3692	-5.6928			0.1204	-6.1311	26.949	-6.921
	0.1205	-82.298	6.4499	-5.9412			0.1205	-6.1661	27.15	-3.6253
	0.1206	-83.238	6.5129	-2.5799			0.1206	-6.1941	27.096	-0.90654
	0.1207	-84.59	6.7294	1.9576			0.1207	-6.4713	27.003	-5.0744
	0.1208	-85.635	6.7879	1.7672			0.1208	-6.7226	27.108	-6.3848
	0.1209	-86.611	7.0378	-0.037592			0.1209	-6.7081	27.304	-2.0532
	0.121	-87.698	7.2419	-0.066943			0.121	-6.6792	27.351	4.8321
	0.1211	-88.616	6.9161	3.0078			0.1211	-6.4546	27.126	8.7271
	0.1212	-89.279	6.9363	6.5109			0.1212	-6.4768	27.106	6.7089
	0.1213	-90.405	6.9082	7.3805			0.1213	-6.3561	27.284	1.1227
	0.1214	-91.856	6.8658	3.0918			0.1214	-6.1548	27.266	-4.1438
	0.1215	-92.846	7.1957	-3.1112			0.1215	-6.5498	27.34	-3.4324
	0.1216	-93.887	7.2244	-4.332			0.1216	-6.7288	27.321	3.7046
	0.1217	-94.921	6.849	0.17933			0.1217	-6.5687	27.275	8.459
	0.1218	-95.536	6.6848	6.2427			0.1218	-6.1405	27.468	3.0233
	0.1219	-96.188	6.6572	4.1245			0.1219	-5.9733	27.527	-4.8185
	0.122	-97.321	6.5482	-4.8833			0.122	-5.9425	27.581	-6.036
	0.1221	-98.339	6.5949	-5.658			0.1221	-5.6862	27.755	-3.2888
	0.1222	-98.906	6.48	0.55648			0.1222	-5.3379	27.991	0.95269
	0.1223	-99.232	6.3057	0.69667			0.1223	-4.9069	28.253	1.6501
	0.1224	-100.09	6.2068	-0.20994			0.1224	-4.9349	28.25	-4.0729
	0.1225	-100.79	5.8672	0.20569			0.1225	-5.0264	28.372	-6.2417
	0.1226	-100.78	5.7783	-1.5764			0.1226	-4.6416	28.594	-0.085374
	0.1227	-101.26	5.9056	-4.4238			0.1227	-4.0913	28.928	1.7141
	0.1228	-101.71	5.6893	-2.3217			0.1228	-4.0866	29.226	-2.8097
	0.1229	-102.61	5.5662	0.40585			0.1229	-4.5153	29.6	-1.6591
	0.123	-103.24	5.47	-0.79165			0.123	-4.4904	29.816	2.0585
	0.1231	-103.12	5.4582	2.9712			0.1231	-4.1186	29.643	2.6766
	0.1232	-103.25	5.3398	10.563			0.1232	-4.0607	29.928	2.1771
	0.1233	-103.5	5.3543	18.634			0.1233	-4.2314	30.485	2.8745
	0.1234	-104.27	5.2779	26.687			0.1234	-4.4336	30.786	3.1758
	0.1235	-104.78	5.1827	21.756			0.1235	-4.5376	31.051	2.6524
	0.1236	-105.15	5.3946	-10.18			0.1236	-4.4954	31.151	-2.621
	0.1237	-105.29	5.4721	-61.867			0.1237	-4.6681	31.586	-8.0432
	0.1238	-105.61	5.5759	-86.703			0.1238	-4.8644	32.051	-3.9159
	0.1239	-106.32	5.4533	-51.766			0.1239	-4.7862	31.915	1.4698
	0.124	-106.6	5.3762	4.9279			0.124	-4.7593	32.152	2.2325
	0.1241	-107.08	5.6671	39.233			0.1241	-5.0514	32.65	1.3033
	0.1242	-107.86	5.9736	50.483			0.1242	-5.4576	32.784	-1.9515
	0.1243	-108.09	5.9128	46.244			0.1243	-5.7262	32.818	-2.4649
	0.1244	-108.27	5.7925	27.272			0.1244	-6.1645	32.863	2.5199
	0.1245	-109.13	6.0036	5.9398			0.1245	-6.3027	33.248	3.9671
	0.1246	-109.75	6.0837	-5.5663			0.1246	-6.3148	33.368	1.7652
	0.1247	-109.78	6.2126	-9.4448			0.1247	-6.5584	33.375	-0.23629
	0.1248	-110.43	6.53	-7.7427			0.1248	-6.7178	33.47	0.20153
	0.1249	-111.44	6.3923	-4.3626			0.1249	-6.7386	32.938	2.5619
	0.125	-112	6.2454	-4.6099			0.125	-6.7888	32.856	3.0284
	0.1251	-112.42	6.2523	-8.4062			0.1251	-7.2219	33.184	0.074479
	0.1252	-113.09	6.1876	-7.7845			0.1252	-7.3541	33.388	-1.3069
	0.1253	-114	6.3456	-0.32377			0.1253	-7.1513	33.4	0.29516
	0.1254	-114.39	6.3078	3.495			0.1254	-6.836	33.003	-0.47518
	0.1255	-114.73	6.2103	2.0929			0.1255	-6.5757	32.738	-4.6554
	0.1256	-115.55	6.0423	0.97384			0.1256	-6.7064	32.883	-5.9126
	0.1257	-116.39	5.9133	-2.512			0.1257	-7.0437	32.643	-1.0227
	0.1258	-117.01	6.0162	-8.4386			0.1258	-6.9803	32.436	5.3128
	0.1259	-117.54	5.9976	-7.3699			0.1259	-6.5061	32.443	7.34
	0.126	-117.87	5.6711	0.34935			0.126	-6.0441	32.307	3.6528
	0.1261	-118.05	5.4086	4.3541			0.1261	-5.8081	32.352	-2.9445
	0.1262	-118.46	5.4812	5.1353			0.1262	-5.7715	32.414	-8.127
	0.1263	-118.85	5.3409	5.7376			0.1263	-5.5406	32.474	-4.7779
	0.1264	-119.25	5.2958	3.5773			0.1264	-5.2701	32.241	1.8791
	0.1265	-119.71	5.1503	1.164			0.1265	-5.0362	31.899	1.9003
	0.1266	-120.05	4.853	0.094248			0.1266	-4.751	32.086	-1.3291
	0.1267	-120.05	4.8093	-3.2143			0.1267	-4.2669	32.424	-0.66995
	0.1268	-119.97	4.7144	-6.2154			0.1268	-3.8167	32.407	2.0981
	0.1269	-120.41	4.5	-0.45047			0.1269	-3.3967	32.371	3.2006
	0.127	-120.76	4.2493	6.1257			0.127	-2.875	32.373	1.6923
	0.1271	-120.55	4.134	7.1604			0.1271	-2.6015	32.275	1.9591
	0.1272	-120.83	3.8082	3.6418			0.1272	-2.5933	32.285	4.3906
	0.1273	-121.13	3.4623	-1.6789			0.1273	-2.3743	32.596	2.0038
	0.1274	-121.05	3.6971	-3.7399			0.1274	-1.8318	32.655	-3.4956
	0.1275	-121.29	3.8234	1.6468			0.1275	-1.5383	32.687	-5.6993
	0.1276	-121.18	3.5329	3.602			0.1276	-1.7819	32.673	-5.9301
	0.1277	-121.02	3.2392	-4.6022			0.1277	-1.5631	32.451	-3.4089
	0.1278	-121.4	3.1218	-9.0831			0.1278	-1.0197	32.625	3.4552
	0.1279	-121.46	3.215	-3.7945			0.1279	-1.0576	32.688	9.6807
	0.128	-121.29	3.2256	2.2887			0.128	-0.99086	32.525	6.5859
	0.1281	-121.44	3.2301	6.3363			0.1281	-0.94067	32.475	-3.7944
	0.1282	-121.6	3.1014	4.5826			0.1282	-1.1974	32.609	-8.1195
	0.1283	-121.82	2.9199	-0.19921			0.1283	-1.0041	32.803	-5.6778
	0.1284	-121.93	3.1808	-0.67971			0.1284	-0.72766	32.827	-0.36887
	0.1285	-122.05	3.33	1.4819			0.1285	-0.86492	32.446	0.54361
	0.1286	-122.1	3.1127	-0.023499			0.1286	-1.031	32.044	-2.4495
	0.1287	-122.47	3.0533	-4.1173			0.1287	-0.80295	32.271	0.79506
	0.1288	-123.33	3.1301	-5.9299			0.1288	-0.50239	32.486	5.7982
	0.1289	-123.64	3.1726	-4.4986			0.1289	-0.68618	32.364	6.5935
	0.129	-123.37	3.1259	0.17785			0.129	-0.90402	32.263	1.0295
	0.1291	-123.53	2.9972	1.099			0.1291	-1.0104	32.116	-4.0528
	0.1292	-124.35	3.2169	-0.98996			0.1292	-1.052	31.942	-5.6838
	0.1293	-124.86	3.4466	1.6731			0.1293	-0.77877	31.825	-2.0432
	0.1294	-125.11	3.5043	4.4177			0.1294	-0.8608	31.817	4.6841
	0.1295	-125.79	3.5358	8.2343			0.1295	-0.9515	31.656	6.4142
	0.1296	-125.99	3.4329	11.966			0.1296	-0.81342	31.426	2.0826
	0.1297	-126.09	3.5705	13.348			0.1297	-0.89233	31.429	-3.9761
	0.1298	-126.54	3.6964	12.551			0.1298	-0.92406	31.558	-7.4168
	0.1299	-126.9	3.8153	9.9698			0.1299	-0.53385	31.509	-7.3817
	0.13	-127.37	3.8703	-4.2913			0.13	-0.28203	31.441	-3.7595
	0.1301	-128.07	3.9334	-38.168			0.1301	-0.52631	31.499	0.38835
	0.1302	-128.86	4.0229	-67.079			0.1302	-0.32292	31.435	0.37123
	0.1303	-129.31	3.7539	-60.602			0.1303	-0.041143	31.424	-0.19619
	0.1304	-129.66	4.0084	-13.515			0.1304	-0.085207	31.63	3.9354
	0.1305	-130.04	4.4669	31.563			0.1305	-0.28332	31.834	8.4343
	0.1306	-130.5	4.2596	49.191			0.1306	-0.14206	31.709	4.6705
	0.1307	-131.16	4.238	45.848			0.1307	0.54607	31.536	-1.7663
	0.1308	-132.22	4.3707	29.094			0.1308	0.57133	31.632	-4.7942
	0.1309	-132.67	4.3744	12.542			0.1309	0.32344	31.822	-1.7464
	0.131	-132.68	4.8492	3.1318			0.131	0.2627	31.983	1.9712
	0.1311	-133.67	5.0488	-4.2768			0.1311	0.099493	32.166	-0.23911
	0.1312	-134.65	4.8811	-10.717			0.1312	0.048609	32.429	-1.6634
	0.1313	-134.63	4.8326	-11.856			0.1313	0.024407	32.363	1.8066
	0.1314	-134.73	4.8851	-7.8089			0.1314	0.0031092	32.321	2.0419
	0.1315	-135.63	5.2715	-3.5085			0.1315	0.10501	32.581	4.6742
	0.1316	-136.21	5.3099	-0.24303			0.1316	0.0026381	32.832	8.1889
	0.1317	-136.42	5.2061	1.3903			0.1317	-0.53114	33.056	5.2456
	0.1318	-136.77	5.2278	2.2661			0.1318	-1.0497	33.466	-2.1668
	0.1319	-137.37	5.0748	0.40878			0.1319	-1.101	33.652	-8.0503
	0.132	-137.97	5.4203	-1.1669			0.132	-1.1532	33.57	-9.2274
	0.1321	-138.17	5.6652	0.79472			0.1321	-1.7255	33.642	-4.7475
	0.1322	-138.6	5.647	1.4545			0.1322	-2.2619	33.817	2.4909
	0.1323	-138.86	5.5953	-0.52534			0.1323	-2.4094	33.983	6.9079
	0.1324	-138.84	5.4931	-0.50223			0.1324	-2.7118	34.114	3.0824
	0.1325	-139.48	5.7039	-2.421			0.1325	-3.2451	34.556	0.15645
	0.1326	-139.92	5.9574	-7.0157			0.1326	-3.6002	34.663	-0.44907
	0.1327	-139.94	6.2804	-6.8878			0.1327	-4.1501	34.439	-3.2455
	0.1328	-140.17	6.3354	-1.9861			0.1328	-4.7995	34.511	-3.885
	0.1329	-140.36	6.1851	0.58701			0.1329	-5.2208	34.871	-2.545
	0.133	-140.68	6.1775	0.20986			0.133	-5.417	35.433	-1.1669
	0.1331	-140.87	6.5792	-0.059433			0.1331	-5.2049	35.467	0.66378
	0.1332	-140.67	7.1948	3.6294			0.1332	-5.5659	35.22	1.5641
	0.1333	-141.03	7.2515	7.5168			0.1333	-6.3781	35.306	5.3684
	0.1334	-141.26	7.1246	3.8857			0.1334	-6.7134	35.631	5.9193
	0.1335	-140.92	7.6382	-0.76494			0.1335	-6.7991	36.032	-0.79253
	0.1336	-141.14	7.9373	-1.4994			0.1336	-6.8759	36.33	-4.9959
	0.1337	-141.56	7.8308	1.2241			0.1337	-6.9355	36.299	-2.1648
	0.1338	-141.62	8.2528	1.1788			0.1338	-6.8076	36.215	1.3186
	0.1339	-141.6	8.4972	-2.0602			0.1339	-7.1033	36.596	0.13335
	0.134	-141.4	8.5776	-2.6082			0.134	-7.2162	37.031	-1.8098
	0.1341	-141.48	9.226	-2.1885			0.1341	-7.1406	37.251	-1.8615
	0.1342	-141.64	9.5537	-5.2194			0.1342	-7.2796	37.307	-1.5469
	0.1343	-141.83	9.5069	-5.2348			0.1343	-7.192	37.471	0.27146
	0.1344	-142.03	9.5965	-0.34512			0.1344	-6.9591	37.715	2.9607
	0.1345	-141.96	9.836	2.1847			0.1345	-6.9147	37.945	3.7744
	0.1346	-142.22	10.261	4.3093			0.1346	-6.5403	38.238	-0.91643
	0.1347	-142.67	10.518	5.5041			0.1347	-6.2641	38.294	-5.4234
	0.1348	-142.73	10.649	-0.39589			0.1348	-6.3798	38.362	-3.9394
	0.1349	-143.07	10.818	-5.9869			0.1349	-6.1704	38.338	0.34121
	0.135	-143.33	11.059	-4.6443			0.135	-5.7529	38.371	1.3507
	0.1351	-143.41	11.1	-0.85051			0.1351	-5.4612	38.611	0.035966
	0.1352	-143.87	10.909	1.4353			0.1352	-5.4993	38.793	-0.7454
	0.1353	-144.31	11.046	7.3844			0.1353	-5.4334	38.729	2.9521
	0.1354	-144.68	11.209	11.509			0.1354	-5.1698	38.762	5.8
	0.1355	-145.11	11.12	10.033			0.1355	-4.7725	38.925	4.5564
	0.1356	-145.71	11.049	9.7879			0.1356	-4.6012	38.732	-0.56302
	0.1357	-146.03	11.114	12.549			0.1357	-4.5436	38.787	-6.7523
	0.1358	-146.49	10.962	16.357			0.1358	-4.3212	38.829	-6.1763
	0.1359	-147.27	10.662	14.407			0.1359	-4.2896	38.728	0.16755
	0.136	-148.21	10.577	-12.79			0.136	-4.0595	38.834	1.2118
	0.1361	-148.91	10.623	-60.216			0.1361	-3.7563	38.934	-4.5222
	0.1362	-149.42	10.501	-78.756			0.1362	-4.016	38.803	-4.8378
	0.1363	-150.3	10.292	-48.252			0.1363	-4.0487	38.593	0.92818
	0.1364	-151.29	10.39	5.9249			0.1364	-3.6484	38.314	6.7665
	0.1365	-152.02	10.117	46.767			0.1365	-3.4871	38.041	7.3292
	0.1366	-152.78	9.9053	54.879			0.1366	-3.4506	38.323	4.3872
	0.1367	-153.84	9.664	40.949			0.1367	-3.4187	38.453	5.02
	0.1368	-154.97	9.4077	19.616			0.1368	-3.534	38.224	2.9449
	0.1369	-155.55	9.4655	2.648			0.1369	-3.358	37.917	-2.2944
	0.137	-156.16	9.3538	-4.6478			0.137	-3.0451	37.64	-1.9776
	0.1371	-157.01	9.111	-10.643			0.1371	-3.0635	37.906	0.57519
	0.1372	-157.9	9.0027	-14.978			0.1372	-3.1094	38.082	-2.3593
	0.1373	-158.92	8.9079	-11.095			0.1373	-3.085	37.985	-5.6875
	0.1374	-159.61	8.7111	-2.7982			0.1374	-2.86	38.045	-5.3247
	0.1375	-160.16	8.6604	-1.0359			0.1375	-2.5922	37.823	-4.6666
	0.1376	-160.65	8.7303	-1.4125			0.1376	-2.4782	37.644	-1.8474
	0.1377	-161.36	8.6564	-2.2981			0.1377	-2.5979	37.528	3.2621
	0.1378	-162.11	8.5659	-3.894			0.1378	-2.5664	37.687	7.3072
	0.1379	-162.57	8.6781	-2.6924			0.1379	-2.3149	37.962	3.9965
	0.138	-163.27	8.7111	2.4039			0.138	-2.3842	37.695	-3.585
	0.1381	-163.67	8.7876	6.4345			0.1381	-2.5308	37.711	-3.8165
	0.1382	-163.89	8.7009	6.613			0.1382	-1.9939	37.469	0.091641
	0.1383	-164.29	8.8358	2.3175			0.1383	-1.8166	37.489	2.2286
	0.1384	-164.32	9.0192	-0.32789			0.1384	-2.2337	37.8	4.3769
	0.1385	-164.43	8.9654	1.2455			0.1385	-2.2104	37.751	3.4411
	0.1386	-164.81	9.0278	3.4232			0.1386	-1.9358	37.922	-2.2815
	0.1387	-165.24	9.0968	2.236			0.1387	-1.2696	38.097	-4.6373
	0.1388	-165.13	9.3399	-2.7341			0.1388	-1.1923	38.221	2.6421
	0.1389	-164.48	9.3133	-5.5525			0.1389	-1.5704	38.379	9.7893
	0.139	-164.25	9.3148	-3.1517			0.139	-1.7308	38.484	5.9204
	0.1391	-164.38	9.5567	-2.112			0.1391	-2.1748	38.579	-2.4808
	0.1392	-164.54	9.3698	-4.2797			0.1392	-1.9184	38.752	-8.4367
	0.1393	-164.08	9.2415	-3.7774			0.1393	-1.4572	39.056	-9.745
	0.1394	-163.44	9.2436	3.0237			0.1394	-1.8535	39.171	-6.1962
	0.1395	-163.44	9.0221	9.5966			0.1395	-2.2372	39.077	-0.02383
	0.1396	-163.82	9.2389	6.4574			0.1396	-2.4493	39.423	3.4923
	0.1397	-163.7	9.5503	-0.072991			0.1397	-2.3376	39.688	2.1051
	0.1398	-163.05	9.3222	-4.8286			0.1398	-2.4182	39.882	2.9388
	0.1399	-162.68	8.8445	-5.5138			0.1399	-2.8917	39.967	4.9175
	0.14	-162.4	8.7744	-0.402			0.14	-3.1604	40.081	3.5547
	0.1401	-162.73	8.9933	4.1447			0.1401	-3.3202	40.329	0.020827
	0.1402	-163.2	8.7612	0.68304			0.1402	-3.5057	40.624	-3.3808
	0.1403	-163.19	8.9599	-3.484			0.1403	-3.523	41.007	-4.8449
	0.1404	-162.69	9.1875	-2.118			0.1404	-3.4768	41.283	-3.283
	0.1405	-162.36	8.9419	0.93517			0.1405	-3.6406	41.538	-1.0281
	0.1406	-163.04	8.7914	1.9655			0.1406	-3.543	41.693	0.75965
	0.1407	-163.75	8.5593	2.7624			0.1407	-3.8798	41.791	0.56647
	0.1408	-163.78	8.7082	6.5516			0.1408	-4.503	41.911	2.1561
	0.1409	-163.99	9.0728	5.3823			0.1409	-4.5567	42.208	2.0699
	0.141	-164.51	8.9701	2.5196			0.141	-4.3464	42.265	-1.4848
	0.1411	-165.17	8.7956	6.2769			0.1411	-4.0168	42.181	-5.9124
	0.1412	-165.63	8.7747	9.1944			0.1412	-3.8723	42.459	-6.3518
	0.1413	-166.26	8.78	9.7998			0.1413	-4.1865	42.544	-2.1633
	0.1414	-167.41	8.9774	10.648			0.1414	-4.3666	42.575	3.4136
	0.1415	-168.24	8.9896	4.1201			0.1415	-4.1608	42.921	9.0606
	0.1416	-168.92	8.9396	-20.97			0.1416	-4.142	42.855	5.8857
	0.1417	-169.58	9.2005	-62.448			0.1417	-3.9913	42.645	-2.8719
	0.1418	-169.83	9.2854	-77.838			0.1418	-3.7033	42.763	-4.7597
	0.1419	-170.2	9.3959	-36.186			0.1419	-3.5604	43.226	-1.1249
	0.142	-171.36	9.5405	19.183			0.142	-3.1754	43.316	1.803
	0.1421	-172.4	9.5006	51.59			0.1421	-3.0379	43.065	2.3225
	0.1422	-173.01	9.7171	57.495			0.1422	-2.951	42.945	-0.20296
	0.1423	-173.63	10.043	41.415			0.1423	-2.6074	43.083	-2.8504
	0.1424	-174.18	10.067	15.673			0.1424	-2.2313	43.296	-1.0637
	0.1425	-174.52	9.985	-2.5029			0.1425	-1.7329	43.093	3.8348
	0.1426	-174.98	10.286	-5.084			0.1426	-1.7848	43.033	7.6115
	0.1427	-175.61	10.46	-5.6546			0.1427	-1.6182	42.916	7.5282
	0.1428	-176.14	10.431	-9.2843			0.1428	-1.3742	42.855	2.8509
	0.1429	-176.41	10.464	-10.469			0.1429	-1.2123	43.092	-1.8814
	0.143	-176.88	10.58	-8.4492			0.143	-0.58964	43.184	-1.4265
	0.1431	-177.27	10.829	-4.2869			0.1431	-0.41617	42.968	-0.51575
	0.1432	-177.45	10.819	2.259			0.1432	-0.81073	42.736	-6.2996
	0.1433	-177.77	10.786	4.0633			0.1433	-0.83759	42.843	-10.472
	0.1434	-177.65	11.008	0.010964			0.1434	-0.66102	43.151	-7.8934
	0.1435	-177.79	11.142	-2.1845			0.1435	-0.61912	43.393	-1.46
	0.1436	-178.49	11.221	-3.2805			0.1436	-0.31818	43.729	4.6369
	0.1437	-179.03	11.233	-0.55375			0.1437	-0.21162	43.809	5.7168
	0.1438	-179.48	11.061	4.1069			0.1438	-0.14529	43.912	3.0256
	0.1439	-179.8	11.033	2.8587			0.1439	-0.18791	44.308	-2.1546
	0.144	-179.98	11.184	-1.3985			0.144	-0.44301	44.539	-3.0112
	0.1441	-180.3	11.323	-3.5369			0.1441	-0.53606	45.152	3.9032
	0.1442	-180.88	11.636	-0.65536			0.1442	-0.57297	45.858	6.0683
	0.1443	-182.05	11.599	0.67415			0.1443	-0.50661	46.151	1.0916
	0.1444	-183	11.529	-3.7054			0.1444	-0.37674	46.824	-3.7272
	0.1445	-183.3	11.942	-5.6226			0.1445	-0.57393	47.645	-2.2298
	0.1446	-183.84	11.953	-3.8013			0.1446	-0.83304	48.121	2.8346
	0.1447	-184.76	11.882	-2.6218			0.1447	-0.9036	48.862	6.5208
	0.1448	-185.42	11.966	3.5589			0.1448	-1.0286	49.724	3.7016
	0.1449	-186.31	12.17	11.208			0.1449	-1.1685	50.485	-4.4484
	0.145	-187.33	12.522	9.5282			0.145	-0.96201	51.141	-5.0123
	0.1451	-187.89	12.487	-0.90704			0.1451	-0.93724	51.821	-0.22196
	0.1452	-188.97	12.537	-6.6149			0.1452	-1.3365	53.01	1.6396
	0.1453	-190.14	12.718	-3.0921			0.1453	-1.5021	53.979	0.58732
	0.1454	-190.93	12.819	-0.9197			0.1454	-1.1528	54.605	-5.567
	0.1455	-191.68	13.154	-4.5965			0.1455	-1.2771	55.529	-10.12
	0.1456	-192.61	13.287	-5.7572			0.1456	-1.6266	56.551	-5.9689
	0.1457	-194.1	13.345	-1.1592			0.1457	-1.4499	57.573	0.54421
	0.1458	-194.86	13.398	5.0691			0.1458	-1.3687	58.53	2.1729
	0.1459	-195.52	13.437	6.6645			0.1459	-1.0942	59.415	0.33685
	0.146	-196.39	13.69	2.0097			0.146	-0.91683	60.387	-0.12554
	0.1461	-196.67	13.762	0.7037			0.1461	-1.4684	61.318	4.9265
	0.1462	-197.25	13.886	5.7411			0.1462	-1.6776	62.067	6.9755
	0.1463	-197.54	14.117	4.2391			0.1463	-1.1822	63.086	5.4581
	0.1464	-198.07	14.228	-3.2559			0.1464	-0.97335	63.967	3.7936
	0.1465	-198.69	14.159	-4.4817			0.1465	-0.70766	64.731	0.93761
	0.1466	-198.72	14.135	-2.8628			0.1466	-0.64199	65.777	1.2999
	0.1467	-198.48	14.428	-3.1748			0.1467	-0.71074	66.747	1.3952
	0.1468	-198.38	14.237	-0.31222			0.1468	-0.66494	67.684	-2.4739
	0.1469	-198.42	13.904	2.1409			0.1469	-0.9123	68.596	-4.4923
	0.147	-197.98	14.22	1.2223			0.147	-0.92315	69.365	-6.7586
	0.1471	-197.36	14.602	-1.3035			0.1471	-0.59526	70.345	-4.9805
	0.1472	-197.14	14.502	-4.2692			0.1472	-0.64842	71.556	1.7366
	0.1473	-197.02	14.465	-1.2568			0.1473	-1.1506	72.768	5.3807
	0.1474	-196.72	14.738	4.8337			0.1474	-1.0438	73.978	2.6303
	0.1475	-196.18	14.801	8.8488			0.1475	-0.64689	74.795	-0.57225
	0.1476	-195.46	14.547	7.0724			0.1476	-0.73223	75.925	3.0436
	0.1477	-194.93	14.749	3.4935			0.1477	-0.81401	77.149	7.6348
	0.1478	-194.58	14.993	5.9676			0.1478	-0.76237	78.303	2.2925
	0.1479	-193.11	14.893	11.478			0.1479	-0.7379	79.713	-9.1063
	0.148	-192.22	15.19	11.378			0.148	-0.91435	80.829	-9.6511
	0.1481	-192.26	15.527	-5.3321			0.1481	-0.88051	82.045	0.35009
	0.1482	-191.59	15.773	-36.087			0.1482	-0.69426	83.505	4.593
	0.1483	-191.12	15.938	-62.749			0.1483	-0.88509	84.691	-1.3655
	0.1484	-190.39	16.137	-58.225			0.1484	-1.0401	85.605	-6.2552
	0.1485	-189.49	16.537	-11.426			0.1485	-0.79389	86.773	-4.5449
	0.1486	-188.91	17.05	33.387			0.1486	-1.0305	88.193	2.2942
	0.1487	-188.36	17.481	47.553			0.1487	-1.4716	89.515	5.7391
	0.1488	-188.01	17.841	44.518			0.1488	-1.1584	90.844	1.8006
	0.1489	-187.37	18.093	33.625			0.1489	-0.9228	92.091	1.5462
	0.149	-186.88	18.516	16.067			0.149	-1.0642	92.921	4.4289
	0.1491	-186.48	19.244	-0.85329			0.1491	-1.2556	94.098	4.2615
	0.1492	-186	19.895	-9.0708			0.1492	-1.2294	95.646	1.531
	0.1493	-185.8	20.333	-11.159			0.1493	-1.1425	96.825	-5.0874
	0.1494	-185.51	20.812	-11.414			0.1494	-0.99573	97.954	-10.321
	0.1495	-184.9	21.331	-7.6537			0.1495	-0.68523	98.687	-8.783
	0.1496	-184.18	21.657	-4.9439			0.1496	-0.31038	99.478	-1.1268
	0.1497	-183.66	22.136	-6.0975			0.1497	-0.52071	100.76	7.0861
	0.1498	-183.43	22.561	-4.3811			0.1498	-0.87928	101.93	11.599
	0.1499	-182.98	22.969	-0.44094			0.1499	-0.7226	102.94	8.9713
	0.15	-182.51	23.555	2.7235			0.15	-0.48825	103.61	0.74531
	0.1501	-182.4	24.059	5.1844			0.1501	-0.30477	104.12	-5.4358
	0.1502	-181.69	24.357	5.3208			0.1502	-0.3595	104.85	-7.9187
	0.1503	-181.01	24.53	0.89634			0.1503	-0.25759	105.78	-5.7122
	0.1504	-180.74	24.649	-3.2979			0.1504	-0.18861	106.52	-1.1659
	0.1505	-180.33	24.697	-3.2293			0.1505	-0.24669	106.92	1.1852
	0.1506	-179.79	24.883	-2.7102			0.1506	-0.3794	107.49	0.39917
	0.1507	-179.37	25.046	-2.211			0.1507	-0.19747	108.23	-1.4133
	0.1508	-178.8	24.957	1.1618			0.1508	0.050339	108.86	-0.093394
	0.1509	-178.37	24.962	6.5819			0.1509	-0.19173	109.4	4.9079
	0.151	-177.97	24.922	5.7412			0.151	-0.20819	109.9	6.6857
	0.1511	-177.53	24.546	-2.2904			0.1511	-0.18758	110.3	3.4638
	0.1512	-177.55	24.368	-7.0561			0.1512	-0.31637	110.54	0.022081
	0.1513	-177.31	24.084	-4.6352			0.1513	-0.61282	111.07	-1.7717
	0.1514	-176.64	23.703	0.28183			0.1514	-0.80142	111.53	-2.4927
	0.1515	-176.27	23.713	4.4832			0.1515	-0.83304	111.73	-3.5178
	0.1516	-176.26	23.362	3.1437			0.1516	-1.1975	112.05	-5.6972
	0.1517	-176.43	22.767	-1.2899			0.1517	-1.4884	112.29	-6.9208
	0.1518	-176.18	22.39	-1.3707			0.1518	-1.5169	112.8	-4.7383
	0.1519	-175.93	22.102	1.4454			0.1519	-1.7444	113.21	-0.34217
	0.152	-175.86	21.752	0.55434			0.152	-2.2517	113.44	1.597
	0.1521	-175.76	21.292	1.2941			0.1521	-2.2659	113.65	3.0382
	0.1522	-176.19	20.966	1.9548			0.1522	-2.171	113.65	6.983
	0.1523	-176.16	20.842	-3.558			0.1523	-2.6512	113.95	6.3498
	0.1524	-175.98	20.587	-7.5936			0.1524	-2.9343	114.45	1.5387
	0.1525	-176.51	20.099	-5.9481			0.1525	-2.9747	114.75	-0.3122
	0.1526	-176.97	19.572	-0.60662			0.1526	-3.2687	114.71	-1.0694
	0.1527	-176.84	19.473	4.4574			0.1527	-3.5366	114.91	-0.90389
	0.1528	-176.83	19.266	3.7114			0.1528	-3.699	115.15	0.45185
	0.1529	-177.56	18.889	0.30658			0.1529	-3.6879	115.18	1.1391
	0.153	-178.22	19.002	2.9301			0.153	-3.8666	115.27	3.2039
	0.1531	-178.5	18.824	6.4562			0.1531	-4.081	115.08	-0.032618
	0.1532	-178.22	18.472	4.9775			0.1532	-4.2976	115.11	-6.3947
	0.1533	-178.31	18.352	0.21921			0.1533	-4.4348	115.27	-3.8203
	0.1534	-178.82	18.338	-3.5816			0.1534	-4.0221	115.08	1.9629
	0.1535	-178.89	18.213	-3.6917			0.1535	-4.0514	114.75	3.3148
	0.1536	-179.14	17.947	-4.2898			0.1536	-4.4658	114.53	0.24113
	0.1537	-179.41	17.779	-4.1871			0.1537	-4.3497	114.42	-2.1684
	0.1538	-179.27	17.936	0.26401			0.1538	-4.0422	114.28	-1.2124
	0.1539	-179.13	17.936	3.9263			0.1539	-3.8177	114.22	0.45295
	0.154	-179.46	17.873	3.7498			0.154	-3.8351	113.91	-0.34225
	0.1541	-179.76	17.915	-2.9443			0.1541	-3.8475	113.31	-3.2302
	0.1542	-179.92	17.752	-8.258			0.1542	-3.494	112.91	-1.9913
	0.1543	-180.1	17.579	-4.0634			0.1543	-3.2368	112.81	2.5621
	0.1544	-180.27	17.562	2.3246			0.1544	-3.1464	112.51	3.6207
	0.1545	-180.52	17.84	6.1566			0.1545	-3.2141	112.25	3.0312
	0.1546	-180.67	17.873	7.1036			0.1546	-3.1655	112	2.6532
	0.1547	-181.03	17.607	6.9388			0.1547	-2.9308	111.67	3.0092
	0.1548	-181.39	17.432	3.2746			0.1548	-2.4167	111.2	1.9776
	0.1549	-181.53	17.465	0.38938			0.1549	-2.296	110.59	-0.65192
	0.155	-181.9	17.522	3.8624			0.155	-2.1011	110.18	-4.8338
	0.1551	-182.28	17.361	7.1715			0.1551	-1.4357	109.86	-5.0882
	0.1552	-182.49	17.074	5.7075			0.1552	-1.5044	109.49	-0.015564
	0.1553	-182.86	16.911	7.0447			0.1553	-1.8325	109.24	3.7693
	0.1554	-183.52	16.995	10.735			0.1554	-1.7489	108.89	3.3058
	0.1555	-184.21	16.807	8.1482			0.1555	-1.1569	108.3	-3.1933
	0.1556	-184.98	16.423	-11.305			0.1556	-0.60285	107.91	-6.7954
	0.1557	-186.08	16.524	-48.724			0.1557	-0.76568	107.64	-3.1108
	0.1558	-186.89	16.491	-70.817			0.1558	-0.94227	107.36	0.84273
	0.1559	-187.12	16.258	-45.896			0.1559	-0.99754	106.99	3.3905
	0.156	-187.88	15.993	3.7775			0.156	-1.0951	106.75	0.69105
	0.1561	-189.15	15.97	37.708			0.1561	-0.95519	106.41	1.5883
	0.1562	-190.15	16.017	47.576			0.1562	-1.0053	105.85	6.9369
	0.1563	-191.15	15.893	41.974			0.1563	-1.1209	105.48	4.4948
	0.1564	-192.13	15.889	24.797			0.1564	-0.96541	105.26	-4.3159
	0.1565	-193.05	15.554	7.6329			0.1565	-0.74628	105.01	-7.0679
	0.1566	-193.98	15.677	-3.578			0.1566	-0.92285	104.82	-2.8599
	0.1567	-194.82	15.775	-9.3465			0.1567	-1.2336	104.23	1.0552
	0.1568	-195.44	15.513	-9.5715			0.1568	-1.3695	103.47	1.4096
	0.1569	-196.03	15.367	-10.147			0.1569	-1.4015	103.21	2.148
	0.157	-197.07	15.495	-9.222			0.157	-1.1837	103.12	4.7667
	0.1571	-198.27	15.645	-5.1846			0.1571	-1.0351	103.07	2.9431
	0.1572	-199.27	15.621	-2.4325			0.1572	-1.1534	102.95	-2.0631
	0.1573	-200.31	15.664	-0.66886			0.1573	-1.3244	102.74	-5.3232
	0.1574	-200.84	15.525	-0.065386			0.1574	-1.3536	102.59	-1.9454
	0.1575	-201.15	15.556	-3.9806			0.1575	-1.4582	102.27	3.7538
	0.1576	-201.94	15.614	-6.8152			0.1576	-1.7284	102.1	2.2048
	0.1577	-202.5	15.634	-0.074786			0.1577	-1.8149	102.23	-3.3819
	0.1578	-202.95	15.437	9.3238			0.1578	-1.3924	102.26	-5.7405
	0.1579	-203.66	15.51	8.616			0.1579	-1.0759	102.34	-3.8607
	0.158	-204.24	16.045	4.5768			0.158	-1.2467	102.28	0.87643
	0.1581	-204.42	15.66	1.3223			0.1581	-1.4992	102.13	2.4866
	0.1582	-204.65	15.191	-1.9259			0.1582	-1.529	102.1	3.1037
	0.1583	-205.07	15.24	-3.1448			0.1583	-1.4618	102.05	4.5262
	0.1584	-205.3	15.044	-4.2706			0.1584	-1.1031	102.14	1.8117
	0.1585	-205.44	15.216	-3.5379			0.1585	-0.77615	102.3	-0.11336
	0.1586	-205.38	15.265	-2.0976			0.1586	-0.59503	102.6	-2.7006
	0.1587	-205.45	15.221	-0.52168			0.1587	-0.81352	102.65	-6.0842
	0.1588	-206.39	15.277	-0.58765			0.1588	-0.98856	102.71	-5.0745
	0.1589	-207.17	15.04	0.75847			0.1589	-0.71101	102.82	0.39381
	0.159	-207.24	14.905	7.4451			0.159	-0.62194	102.92	4.9201
	0.1591	-207.43	14.795	11.593			0.1591	-0.71382	103.29	2.4101
	0.1592	-207.78	14.75	8.1657			0.1592	-0.82057	103.52	-0.10097
	0.1593	-208.44	14.835	-0.74064			0.1593	-0.77564	103.51	4.1629
	0.1594	-209.08	14.772	-6.3705			0.1594	-0.64465	103.53	5.651
	0.1595	-209.6	14.575	-7.4807			0.1595	-0.52455	104.06	0.70866
	0.1596	-210.33	14.635	-6.9239			0.1596	-0.58484	104.57	-4.3774
	0.1597	-210.67	14.833	-3.0316			0.1597	-0.58354	104.62	-5.6207
	0.1598	-211.32	14.855	2.1806			0.1598	-0.49417	104.37	-3.0259
	0.1599	-212.5	14.666	5.7309			0.1599	-0.45423	104.57	1.8307
	0.16	-213.26	14.564	4.8974			0.16	-0.42055	105.12	7.4609
	0.1601	-213.74	14.493	2.1555			0.1601	-0.2224	105.61	10.55
	0.1602	-214.17	14.607	-2.9246			0.1602	-0.17959	105.71	4.7064
	0.1603	-215.06	14.777	-4.4592			0.1603	-0.2044	105.57	-2.5564
	0.1604	-216.33	14.929	-0.066093			0.1604	0.030422	105.95	-5.847
	0.1605	-217.53	14.827	3.2746			0.1605	0.0095887	106.49	-5.4126
	0.1606	-218.01	14.662	5.1137			0.1606	-0.086629	106.67	-3.4201
	0.1607	-218.32	15.048	7.0796			0.1607	-0.24207	106.68	-1.7307
	0.1608	-219.33	15.333	5.3237			0.1608	-0.54517	106.82	-1.504
	0.1609	-220.4	15.301	6.8131			0.1609	-0.26946	107.1	-2.9719
	0.161	-221.48	15.107	11.814			0.161	-0.00059121	107.33	-0.79634
	0.1611	-221.97	15.284	9.4004			0.1611	-0.29817	107.6	0.51646
	0.1612	-222.4	15.549	0.48675			0.1612	-0.54663	107.75	-1.2869
	0.1613	-223.33	15.368	-17.754			0.1613	-0.65051	108.06	1.7453
	0.1614	-223.99	15.343	-46.438			0.1614	-0.80206	108.22	6.8314
	0.1615	-224.79	15.712	-59.178			0.1615	-0.76883	107.98	8.3024
	0.1616	-225.58	15.916	-33.294			0.1616	-0.86727	108.37	4.4304
	0.1617	-226.47	15.945	6.1076			0.1617	-1.1088	108.74	-3.4661
	0.1618	-227.35	15.782	30.517			0.1618	-1.4914	108.71	-9.6642
	0.1619	-227.9	15.483	34.859			0.1619	-1.7284	108.83	-10.572
	0.162	-228.54	15.847	26.223			0.162	-1.8435	108.81	-5.5776
	0.1621	-229.59	16.152	16.02			0.1621	-2.235	109.12	-1.3772
	0.1622	-230.46	15.775	12.374			0.1622	-2.886	109.67	-2.1924
	0.1623	-231.1	15.892	8.1943			0.1623	-3.4808	110.09	-2.0756
	0.1624	-232.16	16.025	-0.34719			0.1624	-3.5183	110.36	1.9808
	0.1625	-233.24	15.805	-5.6658			0.1625	-3.8439	110.77	6.7862
	0.1626	-234.15	15.801	-3.0758			0.1626	-4.3855	111.23	8.6384
	0.1627	-235	15.904	1.1307			0.1627	-4.8792	111.69	3.028
	0.1628	-235.62	15.823	1.002			0.1628	-5.7075	112.4	-6.112
	0.1629	-236.47	15.691	0.34304			0.1629	-6.2397	113.03	-6.4715
	0.163	-237.74	15.631	-1.1993			0.163	-6.4915	113.6	1.3903
	0.1631	-238.83	15.478	-7.7838			0.1631	-7.0911	114.42	4.2233
	0.1632	-239.7	15.432	-13.662			0.1632	-8.0643	115.19	2.0898
	0.1633	-240.54	15.242	-13.631			0.1633	-8.5805	115.78	0.43712
	0.1634	-241.19	15.058	-8.8054			0.1634	-8.8335	116.46	1.3867
	0.1635	-241.83	14.922	-0.53641			0.1635	-9.2768	117.18	5.9165
	0.1636	-242.92	14.732	5.4718			0.1636	-10.493	117.72	6.3167
	0.1637	-244.05	14.828	8.3613			0.1637	-11.375	118.74	-2.0922
	0.1638	-244.2	14.691	6.9895			0.1638	-11.448	119.97	-10.947
	0.1639	-244.75	14.608	5.5218			0.1639	-12.164	120.51	-11.61
	0.164	-245.73	14.529	4.6795			0.164	-12.633	121.02	-3.3595
	0.1641	-246.1	14.301	0.85314			0.1641	-12.62	121.76	4.2863
	0.1642	-246.47	14.167	-1.6921			0.1642	-13.044	122.67	6.3777
	0.1643	-246.84	14.146	-0.99459			0.1643	-13.888	123.69	3.1402
	0.1644	-247.3	14.392	0.31754			0.1644	-14.452	124.34	0.78446
	0.1645	-247.36	14.326	0.096772			0.1645	-14.508	124.82	0.091074
	0.1646	-247.23	13.919	0.96882			0.1646	-14.723	125.3	-2.7565
	0.1647	-247.68	13.847	0.057536			0.1647	-14.797	125.93	-1.1921
	0.1648	-247.75	14.086	-5.3927			0.1648	-14.979	126.61	3.471
	0.1649	-247.59	14.339	-9.0018			0.1649	-15.431	126.94	5.7674
	0.165	-247.4	14.291	-3.9623			0.165	-15.747	127.17	5.0734
	0.1651	-246.99	14.103	4.8697			0.1651	-15.908	127.44	3.7909
	0.1652	-246.85	14.424	8.2013			0.1652	-15.774	127.61	1.2801
	0.1653	-246.65	14.603	5.0209			0.1653	-15.907	127.84	-2.2096
	0.1654	-246.32	14.649	2.6409			0.1654	-16.292	127.92	-1.7472
	0.1655	-245.95	14.93	1.7556			0.1655	-16.28	127.88	-1.0765
	0.1656	-245.48	15.063	0.7191			0.1656	-15.68	128.19	-3.7382
	0.1657	-244.94	15.333	-1.8727			0.1657	-15.505	128.18	-5.9874
	0.1658	-244.68	15.838	-2.7211			0.1658	-15.892	127.88	-6.9989
	0.1659	-244.36	16.083	0.176			0.1659	-15.936	127.98	-5.4289
	0.166	-243.95	16.253	0.98575			0.166	-15.74	128.04	2.8502
	0.1661	-243.78	16.466	-3.2631			0.1661	-15.509	127.75	11.85
	0.1662	-243.81	16.847	-4.9432			0.1662	-15.425	127.65	10.461
	0.1663	-243.78	17.323	-0.98313			0.1663	-15.325	128.03	4.4099
	0.1664	-243.73	17.71	4.242			0.1664	-15.2	128.05	-0.91082
	0.1665	-243.89	17.866	3.9975			0.1665	-15.446	127.76	-6.1762
	0.1666	-244.05	18.178	-6.269			0.1666	-15.684	127.85	-5.0449
	0.1667	-244.34	19.002	-17.421			0.1667	-15.772	127.92	1.1315
	0.1668	-244.77	19.672	-11.303			0.1668	-15.816	128.01	1.496
	0.1669	-245.15	19.763	6.1427			0.1669	-15.609	127.97	-0.8636
	0.167	-245.84	19.805	11.345			0.167	-15.578	128.05	-0.032437
	0.1671	-247.04	20.301	5.4256			0.1671	-15.57	128.42	1.5806
	0.1672	-247.62	20.945	3.1641			0.1672	-15.58	128.83	-2.7081
	0.1673	-248.36	21.349	2.3684			0.1673	-15.928	129.13	-7.2147
	0.1674	-249.47	21.596	1.431			0.1674	-15.549	129.42	-4.8749
	0.1675	-250.31	21.93	2.6186			0.1675	-15.396	129.92	-1.2709
	0.1676	-251.32	22.214	8.2828			0.1676	-15.88	130.35	0.46787
	0.1677	-252.79	22.498	11.917			0.1677	-15.799	130.95	-0.16405
	0.1678	-254.3	22.745	14.741			0.1678	-15.333	131.7	-2.0362
	0.1679	-255.15	23.085	16.147			0.1679	-15.433	132.45	0.68361
	0.168	-256.28	23.57	3.8663			0.168	-15.595	133.25	3.4102
	0.1681	-257.78	23.585	-22.493			0.1681	-15.625	133.74	3.5817
	0.1682	-258.95	23.817	-52.657			0.1682	-16.122	134.21	4.7893
	0.1683	-260.17	24.472	-60.047			0.1683	-16.004	135.08	6.8062
	0.1684	-261.39	24.759	-29.103			0.1684	-15.613	135.79	5.5565
	0.1685	-262.76	24.61	7.9448			0.1685	-15.775	136.33	0.6409
	0.1686	-263.58	24.682	30.832			0.1686	-15.738	137.01	-4.9989
	0.1687	-264.37	24.984	39.917			0.1687	-15.646	137.42	-7.5073
	0.1688	-265.85	25.277	35.096			0.1688	-15.992	137.89	-6.4674
	0.1689	-266.83	25.506	19.897			0.1689	-15.841	138.63	-5.4591
	0.169	-267.28	25.266	5.117			0.169	-15.423	138.92	-4.328
	0.1691	-267.96	25.176	-4.4087			0.1691	-15.287	138.92	0.18014
	0.1692	-269	25.445	-6.3906			0.1692	-14.903	139.23	3.8696
	0.1693	-269.93	25.754	-3.3337			0.1693	-15.016	139.65	4.6185
	0.1694	-270.71	25.993	0.57376			0.1694	-15.339	139.74	1.1211
	0.1695	-270.88	26.019	-1.6313			0.1695	-14.99	139.74	-2.8604
	0.1696	-270.69	25.847	-11.173			0.1696	-14.745	139.8	-3.4705
	0.1697	-271.15	25.921	-10.54			0.1697	-14.846	139.55	2.1068
	0.1698	-271.9	26.27	-0.55158			0.1698	-14.883	139.47	8.8874
	0.1699	-272.29	26.623	2.5503			0.1699	-14.77	139.38	8.2859
	0.17	-272.33	26.805	-2.1169			0.17	-14.445	138.68	-1.1251
	0.1701	-272.29	26.855	-5.9494			0.1701	-14.35	138.3	-6.0405
	0.1702	-272.28	26.791	-2.0183			0.1702	-14.56	138.11	-3.4797
	0.1703	-272.41	27.002	5.6067			0.1703	-14.73	137.68	-1.2657
	0.1704	-272.55	27.199	8.8659			0.1704	-14.367	137.25	-0.12438
	0.1705	-272.61	27.193	7.305			0.1705	-14.287	136.76	-0.059411
	0.1706	-272.6	27.195	3.0303			0.1706	-14.564	136.09	0.1509
	0.1707	-272.33	27.214	-1.5826			0.1707	-14.358	135.53	-0.5908
	0.1708	-272.47	27.501	-3.687			0.1708	-14.058	135.04	0.23375
	0.1709	-272.86	27.57	-5.5106			0.1709	-13.685	134.62	4.2302
	0.171	-272.81	27.918	-7.4722			0.171	-13.829	134.08	4.4042
	0.1711	-272.64	28.024	-6.3992			0.1711	-14.283	133.42	1.8321
	0.1712	-272.7	27.798	-0.51451			0.1712	-14.615	133.03	-0.67427
	0.1713	-273.06	27.788	5.2414			0.1713	-14.772	132.53	-2.3931
	0.1714	-273.59	27.884	7.899			0.1714	-14.612	132.21	-2.8555
	0.1715	-273.54	28.052	6.193			0.1715	-14.59	132.17	-1.8252
	0.1716	-273.71	28.067	0.31022			0.1716	-14.825	131.97	0.22983
	0.1717	-274.41	27.974	-2.9517			0.1717	-15.078	131.55	2.2065
	0.1718	-274.57	27.953	-3.4839			0.1718	-15.261	131.27	4.6527
	0.1719	-274.76	28.021	-2.3113			0.1719	-15.329	131.36	5.8988
	0.172	-275.24	27.896	2.2296			0.172	-15.543	131.62	2.3746
	0.1721	-275.66	27.779	5.6963			0.1721	-15.759	131.81	-4.0191
	0.1722	-276.1	27.517	5.8887			0.1722	-15.717	131.8	-6.582
	0.1723	-276.83	27.203	2.4104			0.1723	-15.763	131.59	-4.3043
	0.1724	-277.48	27.245	-0.17176			0.1724	-16.284	131.61	-1.5251
	0.1725	-277.65	27.575	-2.0719			0.1725	-16.408	132.23	-3.2299
	0.1726	-278.22	27.533	-7.4808			0.1726	-16.088	132.78	-6.3847
	0.1727	-278.81	27.168	-13.551			0.1727	-16.388	132.92	-5.2699
	0.1728	-279.27	27.034	-9.8986			0.1728	-16.94	133.12	0.96814
	0.1729	-280.32	27.08	-0.35627			0.1729	-17.188	133.3	6.4895
	0.173	-280.59	27.04	3.3091			0.173	-17.156	133.52	4.8388
	0.1731	-280.59	26.877	6.3886			0.1731	-17.37	133.88	-0.8199
	0.1732	-281.37	27.004	8.8054			0.1732	-17.826	134.29	-4.5198
	0.1733	-282.19	27.411	4.561			0.1733	-18.161	134.61	-2.0823
	0.1734	-282.81	27.492	0.62309			0.1734	-18.022	134.73	5.0386
	0.1735	-282.76	27.377	-1.4717			0.1735	-18.168	135.09	7.0889
	0.1736	-283.33	27.423	-0.23939			0.1736	-18.453	135.51	3.0937
	0.1737	-284.25	27.598	1.7289			0.1737	-18.615	135.47	-1.104
	0.1738	-284.3	27.756	-2.1454			0.1738	-18.946	135.26	-4.5865
	0.1739	-284.65	27.919	-4.2741			0.1739	-18.845	135.19	-6.5713
	0.174	-285.16	28.26	0.39566			0.174	-18.881	135.28	0.62223
	0.1741	-285.65	28.658	5.3198			0.1741	-19.28	135.19	6.8549
	0.1742	-286.01	28.794	7.3525			0.1742	-19.497	134.89	6.7759
	0.1743	-286.36	28.748	5.6031			0.1743	-19.572	134.7	6.442
	0.1744	-286.96	28.844	0.48964			0.1744	-19.733	134.07	2.9689
	0.1745	-287.52	29.154	-1.8107			0.1745	-19.741	133.71	-2.7474
	0.1746	-287.98	29.406	6.0873			0.1746	-19.801	133.56	-3.5804
	0.1747	-287.75	29.548	12.772			0.1747	-20.19	133.07	-2.9294
	0.1748	-287.83	29.807	8.9412			0.1748	-20.318	132.55	-4.3821
	0.1749	-288.45	30.009	-10.767			0.1749	-20.226	131.88	-5.6461
	0.175	-289.04	30.202	-45.193			0.175	-20.107	131.2	-1.9622
	0.1751	-289.43	30.377	-65.264			0.1751	-20.106	130.4	2.8703
	0.1752	-289.48	30.43	-49.537			0.1752	-20.345	130.04	1.4207
	0.1753	-289.63	30.548	-3.2531			0.1753	-20.23	129.81	-2.9937
	0.1754	-289.98	30.703	38.485			0.1754	-20.115	129.14	-0.73543
	0.1755	-290.45	30.952	48.804			0.1755	-20.311	128.35	5.3333
	0.1756	-290.54	31.108	40.778			0.1756	-20.237	127.57	5.9631
	0.1757	-290.68	31.005	29.797			0.1757	-20.068	126.92	0.27156
	0.1758	-290.8	30.932	16.207			0.1758	-20.107	126.28	-1.3488
	0.1759	-291.13	30.919	1.4012			0.1759	-20.143	125.88	1.4942
	0.176	-291.8	30.844	-2.9867			0.176	-20.016	125.3	0.97766
	0.1761	-291.92	30.826	-5.0673			0.1761	-19.72	124.52	-0.55803
	0.1762	-292.23	30.795	-7.605			0.1762	-19.948	124.23	-1.7895
	0.1763	-292.57	30.477	-5.8073			0.1763	-20.334	123.91	-2.9197
	0.1764	-293.02	30.337	-3.9162			0.1764	-20.419	123.63	-1.4915
	0.1765	-293.44	30.397	-5.4647			0.1765	-20.212	123.3	1.2442
	0.1766	-293.65	30.185	-9.1851			0.1766	-20.139	122.75	3.854
	0.1767	-293.7	30.009	-7.6584			0.1767	-20.362	122.75	6.3265
	0.1768	-294.2	29.789	-2.0722			0.1768	-20.656	122.86	4.7527
	0.1769	-295.09	29.661	-1.1444			0.1769	-20.72	122.53	1.5221
	0.177	-295.43	29.607	-2.7795			0.177	-20.44	122.52	-0.87699
	0.1771	-295.54	29.75	0.25225			0.1771	-20.657	122.86	-0.78081
	0.1772	-295.47	29.793	3.4129			0.1772	-21.056	122.92	-3.4443
	0.1773	-295.73	29.582	0.23738			0.1773	-21.085	123.01	-5.9532
	0.1774	-296.36	29.575	0.0088937			0.1774	-21.231	123.3	-6.3374
	0.1775	-296.65	29.596	5.4945			0.1775	-21.357	123.5	-6.4238
	0.1776	-296.66	29.609	4.9279			0.1776	-21.237	123.72	-2.4961
	0.1777	-296.62	29.573	2.6746			0.1777	-21.489	124.3	-1.5517
	0.1778	-296.51	29.912	-0.13575			0.1778	-21.865	124.82	-4.525
	0.1779	-296.51	30.4	-6.2852			0.1779	-21.999	125.28	-1.1792
	0.178	-296.79	30.555	-5.6012			0.178	-22.191	126.05	4.8485
	0.1781	-296.88	30.46	-2.3739			0.1781	-22.298	126.82	7.8338
	0.1782	-296.55	30.49	-1.0872			0.1782	-22.11	127.43	7.726
	0.1783	-296.14	30.865	1.5699			0.1783	-22.404	128.24	1.8993
	0.1784	-295.9	31.337	2.4627			0.1784	-22.833	129.1	-5.9304
	0.1785	-295.65	31.728	2.3655			0.1785	-22.716	129.54	-7.8816
	0.1786	-295.31	32.236	6.0068			0.1786	-22.569	130.34	-6.3824
	0.1787	-294.81	32.667	4.3746			0.1787	-22.673	131.46	-3.2719
	0.1788	-294.54	33.051	-2.1234			0.1788	-22.703	132.52	1.6448
	0.1789	-294.21	33.462	-3.1276			0.1789	-22.777	133.5	4.8022
	0.179	-293.26	33.678	-0.97683			0.179	-22.733	133.93	4.2098
	0.1791	-292.62	34.085	0.76876			0.1791	-22.479	134.66	2.0414
	0.1792	-292.05	34.728	-1.8965			0.1792	-22.433	135.77	1.0235
	0.1793	-291.52	35.23	-3.7692			0.1793	-22.671	136.48	0.73224
	0.1794	-291.09	35.575	1.7117			0.1794	-22.966	137.22	0.61395
	0.1795	-290.43	35.884	8.8328			0.1795	-22.844	138.13	2.005
	0.1796	-289.59	36.033	11.728			0.1796	-22.716	139.06	2.4373
	0.1797	-288.75	36.3	5.6729			0.1797	-22.859	139.76	1.2508
	0.1798	-288.12	36.713	-3.1502			0.1798	-22.7	140.17	-0.49895
	0.1799	-287.45	37.002	-2.9308			0.1799	-22.548	140.64	-0.93682
	0.18	-287.16	37.424	1.2557			0.18	-23.027	141.23	0.82551
	0.1801	-286.73	37.687	-6.1824			0.1801	-23.741	141.75	1.2657
	0.1802	-285.86	37.617	-33.742			0.1802	-23.556	142.2	-1.2452
	0.1803	-285.39	37.548	-55.495			0.1803	-23.233	142.37	-3.3351
	0.1804	-285.17	37.994	-38.914			0.1804	-23.754	142.63	-3.3166
	0.1805	-284.55	38.44	1.2596			0.1805	-23.918	142.78	-3.2377
	0.1806	-283.86	38.492	30.772			0.1806	-23.995	142.72	-3.1687
	0.1807	-283.84	38.548	41.241			0.1807	-24.246	142.92	-0.35963
	0.1808	-284.26	38.63	40.873			0.1808	-24.397	142.79	3.1194
	0.1809	-283.83	39.111	30.056			0.1809	-24.851	142.54	4.1259
	0.181	-283.2	39.352	16.159			0.181	-25.413	142.43	1.6795
	0.1811	-283.69	39.066	6.4546			0.1811	-25.83	142.37	2.355
	0.1812	-283.74	39.079	-2.2501			0.1812	-25.816	142.19	7.6071
	0.1813	-283.56	39.517	-7.4543			0.1813	-25.563	141.51	2.9943
	0.1814	-283.97	39.825	-9.6765			0.1814	-25.823	141.26	-4.1083
	0.1815	-284.29	40.133	-10.708			0.1815	-26.437	141.04	-4.4672
	0.1816	-284.34	40.247	-10.787			0.1816	-27.226	140.5	-2.3569
	0.1817	-284.5	40.356	-10.433			0.1817	-27.646	139.94	0.75177
	0.1818	-285.15	40.72	-5.388			0.1818	-27.506	139.41	0.765
	0.1819	-285.67	41.025	-3.2033			0.1819	-27.376	138.93	0.25171
	0.182	-285.98	41.379	-5.2531			0.182	-27.571	138.23	2.3358
	0.1821	-286.3	41.982	-5.1908			0.1821	-28.083	137.73	4.1651
	0.1822	-286.76	42.471	0.15949			0.1822	-28.047	137.39	2.1999
	0.1823	-287.5	42.858	8.143			0.1823	-27.715	136.75	-1.5912
	0.1824	-288.13	43.655	10.895			0.1824	-27.658	136.24	-1.2783
	0.1825	-288.82	44.296	8.2258			0.1825	-27.788	135.72	-0.060848
	0.1826	-288.89	44.889	2.5481			0.1826	-28.02	135.04	-2.1316
	0.1827	-288.84	45.761	-5.7566			0.1827	-27.665	134.66	-4.1356
	0.1828	-289.45	46.585	-10.534			0.1828	-27.2	134.31	-6.0101
	0.1829	-290.16	47.13	-8.9135			0.1829	-27.017	134.01	-5.0058
	0.183	-290.59	47.768	-2.3938			0.183	-26.891	133.73	-1.9822
	0.1831	-291.05	49.075	5.4974			0.1831	-26.72	133.34	-1.2231
	0.1832	-291.5	49.819	9.3536			0.1832	-26.695	132.92	0.94587
	0.1833	-291.7	50.287	2.9562			0.1833	-26.759	132.35	6.2759
	0.1834	-292.01	51.483	-5.8585			0.1834	-26.455	131.99	5.9706
	0.1835	-292.2	52.235	-5.5178			0.1835	-26.247	132.02	0.14294
	0.1836	-292.9	52.77	2.105			0.1836	-26.06	131.74	1.0984
	0.1837	-293.46	53.336	9.3606			0.1837	-25.997	131.32	5.6731
	0.1838	-293.93	54.06	6.2126			0.1838	-26.092	130.98	4.9057
	0.1839	-294.89	55.062	-1.2427			0.1839	-26.016	130.9	1.4854
	0.184	-295.33	55.862	-3.8526			0.184	-26.008	130.82	-2.4295
	0.1841	-295.54	56.341	-4.2038			0.1841	-26.028	130.57	-5.886
	0.1842	-296.17	56.797	-3.099			0.1842	-26.132	130.6	-7.2852
	0.1843	-296.88	57.305	0.095731			0.1843	-26.588	130.44	-6.0439
	0.1844	-297.31	57.724	0.36124			0.1844	-26.818	130.54	-2.4025
	0.1845	-298.01	58.15	-2.0419			0.1845	-26.849	130.58	1.5947
	0.1846	-298.93	58.359	-1.6727			0.1846	-27.364	130.5	0.46916
	0.1847	-299.21	58.526	1.2336			0.1847	-28.088	130.83	-0.9922
	0.1848	-299.72	58.851	4.5181			0.1848	-28.664	131.12	3.7524
	0.1849	-300.75	59.168	3.7867			0.1849	-29.25	131.19	5.6105
	0.185	-301.52	59.211	-0.37925			0.185	-29.66	131.27	-0.89357
	0.1851	-302.22	59.044	-5.3218			0.1851	-30.265	131.71	-7.2654
	0.1852	-303.11	59.165	-6.1474			0.1852	-30.887	131.82	-8.3659
	0.1853	-304.04	59.121	-4.0894			0.1853	-31.613	132.08	-4.6945
	0.1854	-304.92	58.696	-2.5568			0.1854	-32.478	132.72	3.9761
	0.1855	-305.94	58.601	-0.47554			0.1855	-33.081	132.86	10.793
	0.1856	-306.7	58.79	4.3057			0.1856	-34.084	133.05	11.081
	0.1857	-307.42	58.673	8.9573			0.1857	-34.641	133.51	4.3953
	0.1858	-308.44	58.473	8.637			0.1858	-34.85	133.83	-2.081
	0.1859	-309.54	58.282	7.6066			0.1859	-35.571	134.24	-1.5173
	0.186	-310.61	57.865	7.3969			0.186	-36.198	134.86	-0.40252
	0.1861	-311.73	57.677	8.3337			0.1861	-37.026	135.41	-2.1192
	0.1862	-312.7	57.52	9.5621			0.1862	-37.916	135.72	-0.55976
	0.1863	-313.4	57.266	8.3897			0.1863	-38.454	135.87	3.5734
	0.1864	-314.05	57.045	-0.40405			0.1864	-38.703	136.33	3.8542
	0.1865	-314.94	56.742	-22.145			0.1865	-38.539	136.71	-1.0706
	0.1866	-316.02	56.572	-55.588			0.1866	-39.217	136.81	-6.831
	0.1867	-317.13	56.46	-70.423			0.1867	-40.006	137.22	-8.8139
	0.1868	-318	56.171	-37.765			0.1868	-39.849	137.71	-2.7595
	0.1869	-318.57	55.817	13.875			0.1869	-40.039	137.91	6.6587
	0.187	-319.44	55.499	46.448			0.187	-40.903	137.95	7.5377
	0.1871	-319.87	55.307	52.279			0.1871	-41.175	137.89	0.28744
	0.1872	-320.02	55.39	41.252			0.1872	-40.606	138.01	-2.5441
	0.1873	-320.4	55.37	24.612			0.1873	-40.693	138.11	-1.183
	0.1874	-320.71	55.225	9.8855			0.1874	-41.451	138.03	-0.84983
	0.1875	-321.59	55.084	0.1942			0.1875	-41.78	138.05	-0.63962
	0.1876	-321.87	54.889	-8.4744			0.1876	-41.65	137.86	2.484
	0.1877	-321.54	54.991	-14.202			0.1877	-41.548	137.6	3.7375
	0.1878	-321.45	55.133	-15.132			0.1878	-41.742	137.55	-0.037168
	0.1879	-321.4	55.101	-11.589			0.1879	-41.972	137.42	-3.3162
	0.188	-321.38	55.232	-4.4194			0.188	-42.235	137.28	-1.7867
	0.1881	-321.21	55.258	3.3026			0.1881	-42.484	137.07	-0.23469
	0.1882	-321.03	55.148	3.6593			0.1882	-42.529	136.72	-2.7295
	0.1883	-320.71	55.526	0.98167			0.1883	-42.456	136.51	-6.3326
	0.1884	-320.58	55.641	0.14823			0.1884	-42.431	136.39	-2.3452
	0.1885	-320.84	55.5	-1.6951			0.1885	-42.88	136.32	4.1906
	0.1886	-320.31	55.644	-1.3145			0.1886	-42.904	136.04	6.4963
	0.1887	-319.35	55.89	-2.0189			0.1887	-42.728	135.88	6.5673
	0.1888	-319.53	56.273	-3.0107			0.1888	-43.172	135.95	3.9902
	0.1889	-319.56	56.415	-1.2928			0.1889	-43.436	135.84	-0.15358
	0.189	-318.98	56.72	0.64878			0.189	-43.899	135.66	-3.1325
	0.1891	-318.75	56.966	1.3198			0.1891	-44.354	135.99	-2.3716
	0.1892	-318.74	57.24	-2.5139			0.1892	-44.477	136.08	-0.97153
	0.1893	-319.12	57.781	-4.6205			0.1893	-44.312	135.88	-0.92601
	0.1894	-318.83	58.019	0.90947			0.1894	-44.571	136.29	-1.9892
	0.1895	-318.88	58.249	6.745			0.1895	-45.258	136.62	-3.1803
	0.1896	-319.4	58.747	0.99086			0.1896	-45.464	136.91	0.93994
	0.1897	-319.38	59.135	-4.8988			0.1897	-45.459	137.5	3.1857
	0.1898	-320.07	59.443	-0.20767			0.1898	-45.345	137.84	-1.0311
	0.1899	-320.62	59.891	6.3195			0.1899	-45.797	138.37	-1.7172
	0.19	-321.15	60.128	5.7734			0.19	-46.168	139.25	2.8206
	0.1901	-321.81	60.364	3.4893			0.1901	-46.192	139.94	2.1107
	0.1902	-322.6	60.637	5.0287			0.1902	-46.138	140.48	-2.5523
	0.1903	-323.34	61.032	3.6399			0.1903	-46.043	141.14	-4.7897
	0.1904	-323.97	61.497	-1.5122			0.1904	-46.357	142.33	-2.6865
	0.1905	-324.94	61.677	-2.4432			0.1905	-46.233	143.16	-0.10554
	0.1906	-326.05	61.802	-0.55683			0.1906	-45.884	143.61	1.4031
	0.1907	-327.03	62.191	-3.9447			0.1907	-46.211	144.2	2.3124
	0.1908	-327.94	62.974	-6.3794			0.1908	-46.279	144.85	0.79041
	0.1909	-329.12	63.484	-6.1449			0.1909	-46.247	145.74	0.2703
	0.191	-330.11	63.556	-6.1552			0.191	-46.293	146.25	-1.6124
	0.1911	-330.79	63.639	-4.787			0.1911	-45.896	146.54	-5.9405
	0.1912	-331.82	64.052	1.8955			0.1912	-45.621	147.34	-3.5889
	0.1913	-332.95	64.352	8.915			0.1913	-45.529	148.02	3.9775
	0.1914	-333.82	64.524	4.1819			0.1914	-45.272	148.23	4.9703
	0.1915	-334.84	65.137	-4.1021			0.1915	-45.015	148.38	2.6617
	0.1916	-335.85	65.372	-2.1807			0.1916	-44.875	148.62	2.4916
	0.1917	-337.08	65.298	0.74021			0.1917	-44.737	149.1	0.37827
	0.1918	-337.68	65.426	0.62352			0.1918	-44.57	149.44	-1.5531
	0.1919	-337.83	65.755	0.16406			0.1919	-44.422	149.46	-0.82678
	0.192	-338.77	66.121	1.0987			0.192	-44.142	149.73	1.1565
	0.1921	-339.87	66.383	2.2703			0.1921	-43.837	150.05	2.2084
	0.1922	-340.36	66.887	1.5082			0.1922	-43.64	150.04	0.16655
	0.1923	-340.91	67.14	0.78788			0.1923	-43.528	150.06	-1.4821
	0.1924	-341.19	67.25	0.4935			0.1924	-43.379	149.88	-0.95
	0.1925	-341.34	67.916	-2.8613			0.1925	-43.193	149.25	0.096779
	0.1926	-341.76	68.552	-2.7114			0.1926	-43.09	149.19	0.21811
	0.1927	-341.87	68.933	1.7448			0.1927	-43.021	149.4	0.39736
	0.1928	-342.02	69.499	3.681			0.1928	-42.878	149.2	1.8529
	0.1929	-342.35	70.079	9.278			0.1929	-42.592	148.83	-0.59887
	0.193	-342.3	70.522	14.027			0.193	-42.456	148.69	-2.6184
	0.1931	-341.87	70.905	10.869			0.1931	-42.845	148.82	-2.357
	0.1932	-341.7	71.408	7.5224			0.1932	-43.208	148.39	-2.5043
	0.1933	-341.65	71.881	3.4826			0.1933	-42.742	147.9	-1.7389
	0.1934	-341.74	72.318	-9.2334			0.1934	-42.105	148.06	1.4554
	0.1935	-341.89	72.918	-34.347			0.1935	-42.023	148.13	4.276
	0.1936	-341.6	73.469	-54.596			0.1936	-42.195	148.02	4.1928
	0.1937	-341.49	73.876	-46.328			0.1937	-42.519	148.06	1.8021
	0.1938	-341.68	74.398	-7.4274			0.1938	-42.758	148.06	-1.4345
	0.1939	-341.43	75.062	26.148			0.1939	-42.239	147.88	-4.9908
	0.194	-341.06	75.377	37.513			0.194	-41.778	147.7	-6.1066
	0.1941	-341.08	75.691	33.741			0.1941	-41.709	147.84	-2.3825
	0.1942	-341.51	76.293	19.903			0.1942	-41.899	147.78	4.7432
	0.1943	-341.55	76.615	8.3839			0.1943	-42.124	147.55	8.4891
	0.1944	-341.4	76.782	6.227			0.1944	-42.132	147.54	5.9838
	0.1945	-341.44	77.353	4.1445			0.1945	-41.979	147.66	1.4349
	0.1946	-341.63	77.699	-4.2836			0.1946	-41.996	147.63	-2.4406
	0.1947	-342.29	77.649	-11.558			0.1947	-42.261	147.62	-1.6364
	0.1948	-342.36	77.71	-10.339			0.1948	-42.283	147.72	-0.73502
	0.1949	-342.43	77.629	-6.0588			0.1949	-42.278	147.79	-3.0797
	0.195	-342.91	77.458	-2.7946			0.195	-42.26	148.11	-3.7923
	0.1951	-343.47	77.59	2.6888			0.1951	-42.017	148.16	-1.9397
	0.1952	-344.48	77.794	5.8427			0.1952	-42.208	148.23	0.072093
	0.1953	-345.32	77.959	2.9273			0.1953	-42.797	148.61	-0.72005
	0.1954	-346.01	77.743	-2.3113			0.1954	-42.859	148.81	-3.7259
	0.1955	-346.93	77.516	-4.494			0.1955	-42.319	149	-3.4359
	0.1956	-347.75	77.381	-4.1788			0.1956	-42.368	148.91	-0.45357
	0.1957	-348.71	76.993	-3.8118			0.1957	-42.96	149.05	1.6849
	0.1958	-349.63	77.244	-2.6352			0.1958	-43.498	149.71	2.3817
	0.1959	-350.45	77.41	-0.12562			0.1959	-43.701	150.12	2.5473
	0.196	-351.83	77.199	4.9655			0.196	-43.493	150.08	5.0588
	0.1961	-352.91	77.27	7.4032			0.1961	-43.148	149.99	4.8097
	0.1962	-353.81	77.061	3.5318			0.1962	-43.008	150.21	1.6612
	0.1963	-355	76.689	-3.9029			0.1963	-43.618	150.56	-0.67684
	0.1964	-356.14	76.587	-6.2441			0.1964	-44.124	150.88	-1.6232
	0.1965	-356.93	76.784	-2.4263			0.1965	-44.026	151.11	-3.4934
	0.1966	-357.42	76.95	-0.46633			0.1966	-43.698	151.32	-7.9234
	0.1967	-358.36	76.91	-2.4046			0.1967	-43.613	151.46	-5.6573
	0.1968	-359.81	76.952	-2.571			0.1968	-43.824	151.85	1.1812
	0.1969	-361.16	77.029	3.6628			0.1969	-44.046	152.31	2.6247
	0.197	-361.98	77.274	9.3126			0.197	-44.068	152.51	1.1712
	0.1971	-362.51	77.336	5.6208			0.1971	-44.135	152.61	2.9833
	0.1972	-363.42	77.425	-0.39426			0.1972	-44.403	152.92	4.65
	0.1973	-364.49	77.911	-1.4968			0.1973	-44.659	152.99	2.6161
	0.1974	-365.42	78.302	-2.577			0.1974	-44.113	152.97	0.55629
	0.1975	-366.42	78.254	-1.6731			0.1975	-43.991	153.3	-1.0804
	0.1976	-367	78.228	1.292			0.1976	-44.45	153.36	1.1703
	0.1977	-367.72	78.601	2.1391			0.1977	-44.405	153.32	3.9891
	0.1978	-368.3	78.962	-0.94061			0.1978	-44.287	153.12	1.6515
	0.1979	-368.09	79.161	-0.58696			0.1979	-44.327	152.96	-5.2358
	0.198	-368.75	79.216	1.3862			0.198	-44.225	153.02	-8.0411
	0.1981	-369.65	79.208	-2.9351			0.1981	-44.279	152.61	-4.7854
	0.1982	-369.75	79.318	-5.8864			0.1982	-44.485	151.97	-0.32352
	0.1983	-369.82	79.246	-0.43431			0.1983	-44.452	152.03	3.364
	0.1984	-369.99	79.146	3.8733			0.1984	-44.52	151.9	6.3303
	0.1985	-370.23	79.345	1.2195			0.1985	-44.637	151.3	3.7381
	0.1986	-370.57	79.444	-1.5737			0.1986	-44.668	151.03	-0.68445
	0.1987	-370.32	79.512	2.5084			0.1987	-44.798	150.57	-2.9931
	0.1988	-370.36	79.298	8.5786			0.1988	-44.959	149.97	-3.2587
	0.1989	-371	78.855	12.141			0.1989	-45.398	149.59	-0.4534
	0.199	-371.51	78.596	11.238			0.199	-45.45	148.96	0.74459
	0.1991	-371.6	78.402	10.995			0.1991	-44.976	148.53	0.17042
	0.1992	-371.36	78.275	8.7445			0.1992	-44.768	148.34	-0.097414
	0.1993	-371.36	78.062	-6.5903			0.1993	-44.797	148.08	0.36109
	0.1994	-371.17	77.853	-33.959			0.1994	-45.256	147.77	2.2691
	0.1995	-371.31	77.517	-53.452			0.1995	-45.617	147.33	2.9084
	0.1996	-371.34	76.836	-46.815			0.1996	-45.545	147.24	-3.0524
	0.1997	-371.27	76.415	-13.247			0.1997	-45.265	147.55	-5.9961
[truncated: 4,002 more rows]

## Sheet: fig 4F
	fig 4F
	direction	E-I offset (ms)	spike rate (Hz)
	0	8.7	167.928
	45	15.3	178.839
	90	34.6	157.93
	135	41.8	159.361
	180	4	186.762
	225	0	105.846
	270	0	91.9942
	315	0	65.2725
	vector sum - direction	101	100
	vector sum - DSI	0.73	0.17

## Sheet: fig 4G,H
	Fig 4G			Fig 4H
	Offset-DSI	Spiking-DSI		Offset-direction (degrees)	Spiking-direction (degrees)
	0.74	0.4703		155	159
	0.48	0.4806		282	270
	0.83	0.3561		105	113
	0.8	0.182235		213	230
	0.6	0.158255		219	242
	0.89	0.220163		20	41
	0.73	0.17		101	100
	0.71	0.273293		101	88
	0.774491	0.1906		90	135
	0.762803	0.3296		8	22
	0.153259	0.1521		175	146
