# Supplementary material for: Retinal direction selectivity in the absence of asymmetric starburst amacrine cell responses
Source: eLife journal article supplement (doi:10.7554/elife.42392), 2019-02-04
Supplement: supp [file elife-42392-supp-v1.zip › elife_poa_e42392_Figure_4_source_data_2.xlsx]

## Sheet: fig 4E
	Fig 4E (left)						Fig 4E (right)
	time (s)	EPSC (pA)	IPSC (pA)	Spiking			time (s)	EPSC (pA)	IPSC (pA)	Spiking
	0	6.3602	1.9315	7.2185			0	6.0554	15.57	1.6631
	0.0001	6.3024	2.0658	5.1768			0.0001	6.3603	15.475	5.6876
	0.0002	6.5493	2.2789	-0.040055			0.0002	6.5115	15.193	2.8208
	0.0003	6.8266	2.0927	-3.291			0.0003	6.3117	15.483	0.8906
	0.0004	6.763	1.9216	-5.357			0.0004	6.0336	15.593	3.8397
	0.0005	6.7162	2.0811	-3.3108			0.0005	6.1212	15.434	3.415
	0.0006	6.8909	2.2583	0.49824			0.0006	6.2709	15.444	-0.42039
	0.0007	6.8192	2.3452	-1.8776			0.0007	6.2577	15.332	-4.8332
	0.0008	7.0778	2.3713	-7.3613			0.0008	6.6494	15.379	-6.0191
	0.0009	7.5352	2.3601	-6.1976			0.0009	6.6124	15.369	-1.98
	0.001	7.2254	2.2969	0.10345			0.001	6.6192	15.414	0.46276
	0.0011	7.559	2.1552	2.9683			0.0011	6.7529	15.457	0.69842
	0.0012	8.2545	2.0322	2.161			0.0012	6.6084	15.23	2.4818
	0.0013	8.2545	2.194	0.15153			0.0013	6.7532	15.168	3.7785
	0.0014	8.097	2.3261	-0.38688			0.0014	6.7015	15.268	2.4635
	0.0015	8.1879	2.2965	1.32			0.0015	6.7409	15.285	1.8026
	0.0016	8.8926	2.2167	4.0423			0.0016	6.927	15.172	1.1756
	0.0017	9.5895	2.0173	3.8547			0.0017	6.9193	15.043	-1.9967
	0.0018	9.6965	2.1915	2.2789			0.0018	6.847	15.04	-0.56797
	0.0019	9.4587	2.4609	-0.70623			0.0019	6.8704	14.999	3.7777
	0.002	9.3531	2.2758	-0.94733			0.002	7.0508	14.977	3.6073
	0.0021	9.4483	2.1451	0.19853			0.0021	6.9466	15.004	-0.51568
	0.0022	9.5865	2.3806	0.64525			0.0022	6.8509	14.8	-3.8991
	0.0023	9.729	2.6411	3.992			0.0023	6.8896	14.814	-3.451
	0.0024	9.8524	2.5848	5.3634			0.0024	6.8711	14.701	-5.0161
	0.0025	10.138	2.5877	-0.8345			0.0025	6.8564	14.548	-7.1803
	0.0026	10.013	2.8456	-4.6887			0.0026	6.8495	14.551	-4.7593
	0.0027	9.6346	3.0864	0.13098			0.0027	6.6635	14.448	-1.0073
	0.0028	9.3224	3.2091	1.6295			0.0028	6.564	14.37	1.0631
	0.0029	9.3193	3.1	-2.3924			0.0029	6.744	14.125	3.899
	0.003	9.3902	3.0409	-1.9769			0.003	6.7386	14.103	7.0329
	0.0031	9.0529	3.4684	0.30463			0.0031	6.5877	14.206	6.9894
	0.0032	9.0996	3.6956	2.2639			0.0032	6.2543	13.918	2.4333
	0.0033	9.186	3.6296	2.5423			0.0033	6.2527	13.641	-3.3209
	0.0034	8.7019	3.8619	-0.8696			0.0034	6.7683	13.768	-5.6974
	0.0035	8.528	4.0901	-1.5659			0.0035	6.9268	13.694	-5.9572
	0.0036	8.7329	4.1043	0.91022			0.0036	6.8536	13.404	-2.3125
	0.0037	8.2792	4.0684	-0.24629			0.0037	6.8946	13.455	3.9853
	0.0038	7.8694	3.9622	-4.3837			0.0038	6.9313	13.702	5.6978
	0.0039	7.9524	4.2076	-6.5061			0.0039	7.0274	13.59	4.277
	0.004	8.0654	4.7105	-2.8882			0.004	7.1548	13.317	4.5406
	0.0041	7.8188	4.8531	2.036			0.0041	7.2898	13.54	0.79861
	0.0042	7.7485	4.666	4.3992			0.0042	7.447	13.741	-4.1556
	0.0043	7.7381	4.5689	3.0657			0.0043	7.6898	13.711	-5.5173
	0.0044	7.5482	4.8213	-2.1976			0.0044	7.7689	13.65	-6.1099
	0.0045	7.5149	4.8165	-5.9103			0.0045	7.6427	13.494	-4.2491
	0.0046	7.4611	4.8293	-2.1244			0.0046	8.0607	13.475	0.203
	0.0047	7.5087	5.0193	3.2561			0.0047	8.1913	13.66	4.2642
	0.0048	7.5953	5.0407	3.3652			0.0048	7.9637	13.952	4.9245
	0.0049	7.549	5.0713	3.2033			0.0049	8.5268	14.004	5.2511
	0.005	7.5791	5.0257	4.5927			0.005	8.5428	13.776	3.8179
	0.0051	7.4248	5.0556	5.9372			0.0051	8.511	13.788	2.9654
	0.0052	7.245	5.1545	5.3447			0.0052	8.686	14.049	5.0734
	0.0053	7.3828	5.0974	0.66936			0.0053	8.6673	14.14	2.556
	0.0054	7.5513	5.0759	-3.4933			0.0054	8.8056	13.866	-5.7253
	0.0055	7.7244	5.13	-2.1842			0.0055	8.6775	13.837	-7.0317
	0.0056	8.154	5.1831	1.6484			0.0056	8.8099	13.981	-1.0283
	0.0057	8.1335	5.4444	0.9458			0.0057	8.8303	13.968	-1.2345
	0.0058	7.629	5.5452	-2.1242			0.0058	8.5941	14.026	-5.5333
	0.0059	7.6605	5.4176	-3.9527			0.0059	8.486	14.098	-6.4793
	0.006	8.0015	5.4265	-7.4119			0.006	8.4147	13.999	-3.8155
	0.0061	8.3745	5.6989	-7.0255			0.0061	8.4765	13.702	2.3276
	0.0062	8.3226	5.9549	-3.4573			0.0062	8.4008	13.593	6.3045
	0.0063	7.9618	5.7955	-3.0885			0.0063	8.3104	13.622	2.0701
	0.0064	8.1646	5.699	-2.1471			0.0064	8.2317	13.59	0.026873
	0.0065	8.4293	5.9483	-0.083461			0.0065	7.8025	13.351	-0.28445
	0.0066	8.2153	6.3431	2.2833			0.0066	7.9199	13.324	0.5726
	0.0067	8.1472	6.6136	4.6958			0.0067	8.0571	13.334	1.1342
	0.0068	8.164	6.5481	3.8767			0.0068	7.72	13.152	2.2235
	0.0069	8.2901	6.4266	0.48564			0.0069	7.4534	13.101	2.3648
	0.007	8.4901	6.5137	2.1191			0.007	7.0368	12.949	0.91678
	0.0071	8.4928	6.57	5.241			0.0071	7.1128	12.709	-1.3741
	0.0072	8.2857	6.7901	2.6885			0.0072	7.4445	12.606	-2.1709
	0.0073	8.3643	7.1584	-2.8797			0.0073	7.4549	12.594	-1.4811
	0.0074	8.8191	7.2182	-3.8724			0.0074	6.982	12.5	-2.4785
	0.0075	8.7009	7.1081	1.082			0.0075	6.7318	12.468	-0.46634
	0.0076	8.4634	7.2192	3.2686			0.0076	6.9259	12.314	4.3709
	0.0077	8.61	7.3522	-1.2161			0.0077	7.0015	12.136	3.8711
	0.0078	8.6385	7.209	-3.5873			0.0078	6.9052	12.287	0.66809
	0.0079	8.7468	7.2097	-0.087171			0.0079	6.7337	12.367	-1.3884
	0.008	8.7811	7.2939	4.364			0.008	6.9588	12.267	-1.4819
	0.0081	8.7125	7.322	3.399			0.0081	7.3761	12.137	-0.97711
	0.0082	8.9041	7.1843	-1.4664			0.0082	7.4918	11.981	-2.0945
	0.0083	8.879	7.1568	-2.4782			0.0083	7.3866	12.163	-4.3995
	0.0084	8.7403	7.2935	-1.8807			0.0084	7.3679	12.392	-2.6297
	0.0085	8.9816	6.9106	-2.6909			0.0085	7.5018	12.178	1.916
	0.0086	9.238	6.7097	-2.8994			0.0086	7.7115	12.17	4.2676
	0.0087	9.1701	6.9587	-3.2175			0.0087	7.9549	12.439	4.3845
	0.0088	9.3197	7.0492	2.3697			0.0088	8.0795	12.353	1.4681
	0.0089	9.3586	6.7318	8.5956			0.0089	8.2782	12.226	-2.7032
	0.009	9.0047	6.3386	5.493			0.009	8.7263	12.53	-2.3152
	0.0091	9.0881	6.4716	-0.73398			0.0091	8.9816	12.715	0.0029943
	0.0092	9.3896	6.3765	-1.1679			0.0092	8.9743	12.554	2.5678
	0.0093	9.553	6.0204	-0.13639			0.0093	8.9399	12.438	3.9257
	0.0094	9.4808	6.0581	-5.1965			0.0094	9.3941	12.594	2.4118
	0.0095	9.1917	6.1101	-8.5706			0.0095	9.8894	12.952	1.5894
	0.0096	9.0972	5.9035	-5.4816			0.0096	9.8968	12.718	-0.23932
	0.0097	9.006	5.7541	-0.73256			0.0097	9.9056	12.414	-2.3489
	0.0098	8.9941	5.5672	3.1397			0.0098	9.8229	12.645	-1.6125
	0.0099	9.2236	5.223	5.886			0.0099	9.7492	12.8	-1.5216
	0.01	8.9797	5.2198	4.6088			0.01	10.167	12.832	-4.7136
	0.0101	8.6367	5.311	-0.01228			0.0101	10.341	12.746	-7.2837
	0.0102	8.7335	4.9976	-4.3357			0.0102	10.37	12.534	-5.4077
	0.0103	8.769	5.0076	-1.1441			0.0103	10.318	12.474	-0.89821
	0.0104	8.5223	5.0767	5.2954			0.0104	10.187	12.618	3.6503
	0.0105	8.3423	4.7899	6.2797			0.0105	10.138	12.477	5.5966
	0.0106	8.3711	4.6316	1.3915			0.0106	10.057	12.207	3.7313
	0.0107	8.5526	4.5251	-0.77026			0.0107	10.427	12.128	-0.62257
	0.0108	8.6379	4.6685	2.0284			0.0108	10.674	11.841	-1.0183
	0.0109	8.4688	4.7251	4.8747			0.0109	10.377	11.838	2.5436
	0.011	8.3662	4.3542	3.4553			0.011	10.028	11.891	5.7355
	0.0111	8.4952	4.1438	-2.3544			0.0111	10.145	11.708	5.2578
	0.0112	8.6638	4.2441	-6.431			0.0112	10.335	11.767	1.0471
	0.0113	8.7681	4.1223	-5.433			0.0113	10.32	11.406	-2.4906
	0.0114	8.8107	4.0087	-4.159			0.0114	9.9787	11.168	1.3498
	0.0115	8.6379	3.9664	-2.1713			0.0115	9.7661	11.235	4.3645
	0.0116	8.6781	3.8284	0.33174			0.0116	9.712	11.044	-0.66418
	0.0117	8.8654	3.7708	1.8736			0.0117	9.4493	10.866	-3.3048
	0.0118	8.4647	3.6659	3.9991			0.0118	9.205	10.848	-2.4928
	0.0119	8.4026	3.7016	6.2071			0.0119	9.3277	10.883	-2.5247
	0.012	9.0402	3.7001	1.3242			0.012	9.4144	10.808	-4.594
	0.0121	9.4159	3.5605	-3.6614			0.0121	9.2891	10.684	-5.4899
	0.0122	9.136	3.4747	-2.9441			0.0122	8.9341	10.386	-4.2029
	0.0123	8.7046	3.5423	-5.1993			0.0123	9.0248	10.263	-5.5896
	0.0124	8.5485	3.4157	-7.4935			0.0124	9.2164	10.381	-6.0502
	0.0125	8.4969	3.3944	-2.3925			0.0125	9.0089	10.299	-2.6782
	0.0126	8.8269	3.4491	4.6743			0.0126	8.9647	10.207	5.3293
	0.0127	9.0462	3.325	6.2956			0.0127	8.7223	10.033	10.791
	0.0128	9.2072	3.466	3.4718			0.0128	8.714	10.109	8.5752
	0.0129	9.109	3.592	-0.67255			0.0129	8.9171	10.134	2.8512
	0.013	8.6913	3.5448	-4.0998			0.013	8.8198	9.9411	-3.0903
	0.0131	8.4684	3.1912	-4.8461			0.0131	8.6432	10.012	-5.9878
	0.0132	8.5489	3.0389	-0.9277			0.0132	8.6432	9.8133	-5.3874
	0.0133	8.7787	3.4733	4.0912			0.0133	8.4989	9.5693	-1.799
	0.0134	8.8074	3.6685	5.5549			0.0134	8.3941	9.5543	3.2406
	0.0135	8.7666	3.7454	2.5934			0.0135	8.5418	9.5	2.9068
	0.0136	8.7665	3.9298	-0.79999			0.0136	8.3399	9.3877	2.0889
	0.0137	8.8317	3.7424	-0.73896			0.0137	8.1213	9.2666	5.278
	0.0138	8.6727	3.8879	-4.3413			0.0138	8.5014	9.1241	1.0908
	0.0139	8.462	4.4346	-6.8012			0.0139	8.2766	8.9588	-5.911
	0.014	8.5048	4.4143	-3.4815			0.014	7.7688	8.7906	-6.0198
	0.0141	9.0704	4.2594	1.9492			0.0141	8.5099	8.7202	-5.3776
	0.0142	8.9175	4.4623	7.4807			0.0142	8.948	8.7595	-3.33
	0.0143	8.4808	4.6346	9.5681			0.0143	8.4141	8.6175	2.6416
	0.0144	8.6977	4.7193	4.0778			0.0144	8.212	8.3267	9.1926
	0.0145	8.9039	4.7936	-7.19			0.0145	7.8972	8.0579	9.111
	0.0146	9.0992	4.8245	-9.7172			0.0146	8.1325	7.9166	5.703
	0.0147	9.0902	4.8029	-2.9208			0.0147	8.3636	7.966	4.6719
	0.0148	9.1119	4.9703	5.0837			0.0148	8.1771	7.6469	1.4914
	0.0149	9.1207	4.9615	9.9022			0.0149	8.1858	7.1972	-4.3064
	0.015	9.015	4.8934	6.0381			0.015	8.1711	7.1004	-7.5973
	0.0151	8.9828	4.9471	-0.68481			0.0151	8.0532	7.2881	-2.9768
	0.0152	9.0288	4.7732	-3.078			0.0152	7.6274	7.2716	-0.66242
	0.0153	9.1513	4.5686	-1.2925			0.0153	7.5806	6.8377	-3.9405
	0.0154	9.3252	4.7764	1.5548			0.0154	7.8526	6.5733	-1.9238
	0.0155	9.0276	5.2828	-2.0854			0.0155	7.8998	6.7968	4.2457
	0.0156	8.6563	5.0996	-4.472			0.0156	7.7031	6.7388	3.4107
	0.0157	8.588	4.7742	-0.87156			0.0157	7.5977	6.674	0.52526
	0.0158	8.8465	4.5099	-0.33281			0.0158	7.8062	7.0112	2.5684
	0.0159	8.8309	4.1246	-0.52026			0.0159	7.6421	6.8554	3.5018
	0.016	8.397	4.2219	-1.1229			0.016	7.6535	6.8368	0.46983
	0.0161	8.3833	4.2863	-3.5979			0.0161	7.7698	6.7328	-4.0452
	0.0162	8.6247	3.9101	-1.8747			0.0162	7.3897	6.5587	-5.2569
	0.0163	8.4096	3.4666	3.1301			0.0163	7.3742	7.071	0.4361
	0.0164	8.2151	3.501	4.5173			0.0164	7.4473	7.3695	2.8032
	0.0165	7.9523	3.4931	-1.414			0.0165	6.9621	7.2128	0.28765
	0.0166	7.3503	3.1591	-5.708			0.0166	6.9566	7.2759	-3.4267
	0.0167	7.2295	2.9086	-4.9265			0.0167	7.0351	7.5261	-5.2609
	0.0168	7.1417	2.9391	-0.81558			0.0168	6.7271	7.7989	-4.5859
	0.0169	6.8983	2.7993	3.1429			0.0169	6.7292	7.8265	-3.408
	0.017	6.6226	2.4383	0.66623			0.017	6.5588	7.8548	1.4122
	0.0171	6.2204	2.4071	-4.5798			0.0171	6.1174	8.3313	8.4757
	0.0172	5.6057	2.5377	-2.2585			0.0172	6.2424	8.8259	9.1596
	0.0173	5.3628	2.516	6.8643			0.0173	6.5152	9.1463	4.5964
	0.0174	5.2475	2.291	10.419			0.0174	6.3379	9.3544	2.1988
	0.0175	5.2428	2.034	6.5337			0.0175	6.1858	9.3558	2.3895
	0.0176	5.1537	1.8997	0.40075			0.0176	6.0038	9.6582	0.74199
	0.0177	4.6032	1.9204	-2.7656			0.0177	5.9859	10.171	-1.9633
	0.0178	4.3621	1.769	-2.5627			0.0178	6.1537	9.9547	-6.0303
	0.0179	4.1186	1.6876	-3.7214			0.0179	6.0531	10.008	-9.5249
	0.018	4.0725	1.74	-3.1184			0.018	5.6937	10.573	-5.6602
	0.0181	3.8231	1.6822	-0.39861			0.0181	5.8143	10.91	0.38322
	0.0182	3.4081	1.4883	-0.84455			0.0182	5.766	10.983	0.12225
	0.0183	3.4108	1.2929	-1.384			0.0183	5.3969	10.992	-2.4766
	0.0184	3.1342	1.4538	0.18874			0.0184	5.4938	10.966	0.041733
	0.0185	3.4229	1.6323	-2.3833			0.0185	5.437	11.063	3.365
	0.0186	3.2931	1.8803	-3.8576			0.0186	5.2631	11.231	4.7635
	0.0187	2.4559	1.9216	2.0399			0.0187	5.4468	11.311	5.9148
	0.0188	2.3052	1.5631	7.3361			0.0188	5.3866	11.243	2.8942
	0.0189	2.5262	1.5419	2.9589			0.0189	5.0585	11.252	-0.64787
	0.019	2.5901	1.6954	-5.0021			0.019	4.9287	11.453	-1.7957
	0.0191	2.4939	1.7532	-3.3943			0.0191	5.0123	11.311	-1.9293
	0.0192	2.2214	1.8722	2.7795			0.0192	4.9963	11.281	0.96291
	0.0193	1.8854	2.0433	5.6371			0.0193	5.1465	11.329	1.2661
	0.0194	1.866	1.9055	4.8863			0.0194	5.2018	11.177	-0.13629
	0.0195	1.8957	1.665	0.5525			0.0195	4.827	11.151	-0.542
	0.0196	2.0118	1.5434	-5.4231			0.0196	4.6686	11.161	-2.1304
	0.0197	1.613	1.8289	-3.8799			0.0197	4.7686	10.954	-2.5692
	0.0198	1.3294	1.9824	2.8171			0.0198	4.8101	10.737	-0.69312
	0.0199	1.5318	1.9284	6.8565			0.0199	4.5282	10.664	0.1886
	0.02	1.5649	1.926	3.4384			0.02	4.5221	10.639	1.0444
	0.0201	1.521	1.8139	-1.3455			0.0201	4.7168	10.673	-0.17945
	0.0202	1.3722	1.8923	-1.6501			0.0202	4.8348	10.728	-3.4688
	0.0203	1.5774	1.8739	0.29534			0.0203	4.5555	10.541	-5.7946
	0.0204	1.8483	2.0581	3.559			0.0204	4.3845	10.268	-2.6346
	0.0205	1.6598	2.3643	0.24164			0.0205	4.7825	10.16	1.6313
	0.0206	1.9207	2.3413	-7.4628			0.0206	4.8843	10.247	0.027903
	0.0207	2.1064	2.4528	-10.924			0.0207	4.751	10.345	0.9223
	0.0208	1.7917	2.6088	-9.0301			0.0208	4.708	10.327	4.1764
	0.0209	1.9886	2.4319	-3.1672			0.0209	4.8218	10.408	2.2133
	0.021	2.2782	2.4001	0.56326			0.021	5.0435	10.342	-1.7163
	0.0211	2.3796	2.5275	4.7502			0.0211	5.2486	10.132	-3.7905
	0.0212	2.8153	2.6583	7.3287			0.0212	5.3997	10.392	-2.4096
	0.0213	2.9012	3.0716	6.0398			0.0213	5.1644	10.749	0.068919
	0.0214	2.6692	3.3394	4.1632			0.0214	4.7702	10.438	1.0263
	0.0215	2.7439	3.1822	2.0489			0.0215	4.8873	10.053	1.5156
	0.0216	3.2863	3.1883	0.48636			0.0216	5.06	10.185	5.0518
	0.0217	3.7367	3.195	1.1304			0.0217	4.9459	10.366	5.6721
	0.0218	3.8166	3.3144	-0.39819			0.0218	4.9694	10.346	3.0606
	0.0219	3.4182	3.8335	-3.0684			0.0219	4.828	10.505	2.9343
	0.022	3.4734	4.1206	-3.4584			0.022	4.7055	10.58	6.2706
	0.0221	3.6651	4.236	2.0588			0.0221	4.7922	10.377	5.2486
	0.0222	3.4498	4.2202	6.5876			0.0222	5.0237	10.255	-1.4334
	0.0223	3.3165	4.2731	0.72272			0.0223	4.9412	10.528	-5.7358
	0.0224	2.9855	4.498	-3.9227			0.0224	4.4214	10.563	-3.6919
	0.0225	3.1339	4.7482	-4.2409			0.0225	4.5046	10.209	-0.46261
	0.0226	3.3962	5.0742	-4.9866			0.0226	4.7326	10.314	-0.41097
	0.0227	3.0658	5.2594	-10.806			0.0227	4.8662	10.589	-3.0657
	0.0228	2.6602	5.1381	-10.958			0.0228	4.5748	10.529	-4.9992
	0.0229	2.2182	5.1189	1.3384			0.0229	3.8773	10.382	-3.7089
	0.023	1.6886	5.5638	12.713			0.023	3.7379	10.234	-3.1189
	0.0231	1.6954	5.5513	13.976			0.0231	3.8375	10.288	-1.3505
	0.0232	1.7039	5.5129	7.4564			0.0232	3.7862	10.559	1.635
	0.0233	1.6269	5.956	0.78305			0.0233	3.462	10.317	0.61955
	0.0234	1.117	6.0742	-2.3584			0.0234	3.1696	10.024	-0.40961
	0.0235	0.78765	5.9084	-2.4498			0.0235	3.2712	10.04	2.3206
	0.0236	0.77842	5.8361	-1.8561			0.0236	3.0192	10.12	2.081
	0.0237	0.40966	5.9506	-4.01			0.0237	2.6695	10.181	-0.65758
	0.0238	-0.14396	5.9856	-3.4189			0.0238	2.4127	10.276	-1.6418
	0.0239	-0.45943	6.1582	2.2139			0.0239	2.4124	10.428	0.59678
	0.024	-0.35276	6.1225	2.8935			0.024	2.4789	10.537	3.2982
	0.0241	-0.063944	5.9974	0.60057			0.0241	2.4921	10.364	2.4709
	0.0242	-0.18293	6.077	-0.69588			0.0242	2.4902	10.247	2.7876
	0.0243	-0.89366	6.073	-0.6729			0.0243	2.2494	10.573	3.6509
	0.0244	-0.9709	5.8509	-0.27112			0.0244	2.2794	10.637	0.20935
	0.0245	-0.3915	5.5312	-1.6575			0.0245	2.5139	10.486	-3.7634
	0.0246	-0.034699	5.5899	-3.457			0.0246	2.3112	10.832	-3.5432
	0.0247	0.020064	5.7126	-1.9577			0.0247	2.1589	11.131	-0.0046913
	0.0248	-0.090843	5.4768	1.6783			0.0248	2.2486	10.989	4.5439
	0.0249	-0.12247	5.212	1.2791			0.0249	2.4214	11.012	1.8187
	0.025	0.35773	5.2295	-0.025447			0.025	3.0786	11.119	-7.2614
	0.0251	0.67897	5.1364	3.0392			0.0251	3.1346	11.138	-8.4172
	0.0252	0.67772	4.7892	4.6895			0.0252	2.9291	11.149	0.51505
	0.0253	0.98489	4.8729	2.6976			0.0253	3.1749	11.309	4.2771
	0.0254	1.3177	4.8274	-3.2059			0.0254	3.5919	11.63	-0.3148
	0.0255	1.4667	4.7404	-3.9053			0.0255	3.9147	11.682	-3.6381
	0.0256	1.8471	4.8173	-1.3156			0.0256	4.1647	11.773	-5.0235
	0.0257	2.2096	4.6266	-2.1515			0.0257	4.136	11.778	-4.4925
	0.0258	2.4342	4.5557	-1.8386			0.0258	4.324	11.543	-0.47371
	0.0259	2.4057	4.6043	1.8275			0.0259	4.9073	11.658	3.0729
	0.026	2.5714	4.6808	3.2842			0.026	5.2021	11.845	3.6597
	0.0261	3.0108	4.4923	2.4108			0.0261	5.4466	11.777	3.2682
	0.0262	3.2053	4.2847	2.2088			0.0262	5.2716	11.713	7.3755
	0.0263	3.4434	4.4435	2.199			0.0263	5.3266	11.623	8.4419
	0.0264	3.4239	4.638	-0.38804			0.0264	5.877	11.59	0.61655
	0.0265	3.3373	4.4193	-1.0629			0.0265	6.433	11.669	-7.7796
	0.0266	3.2054	4.352	-0.67577			0.0266	6.3699	11.536	-5.2022
	0.0267	3.3451	4.3649	-3.8395			0.0267	5.9561	11.42	1.4717
	0.0268	3.4236	4.3352	-3.3085			0.0268	6.2019	11.319	3.6753
	0.0269	3.336	4.3365	1.7059			0.0269	6.6608	11.133	-0.12028
	0.027	3.3005	4.4441	2.4044			0.027	6.4915	11.036	-2.3153
	0.0271	3.0734	4.6454	1.7151			0.0271	6.3725	10.993	0.85436
	0.0272	2.9732	4.5329	2.2908			0.0272	6.534	10.925	2.1437
	0.0273	2.8365	4.5179	1.6202			0.0273	6.3129	10.796	0.18253
	0.0274	2.8182	4.5507	-0.80855			0.0274	6.5673	10.803	1.0408
	0.0275	2.6961	4.4658	-5.2321			0.0275	6.8732	10.783	4.1104
	0.0276	2.3531	4.5156	-5.4903			0.0276	6.6032	10.552	4.0421
	0.0277	2.3684	4.7949	-1.127			0.0277	6.3775	10.388	0.21915
	0.0278	2.0977	4.9191	-0.057555			0.0278	6.268	10.088	-2.8519
	0.0279	1.7965	4.7212	0.93927			0.0279	5.8792	10.013	-2.3982
	0.028	1.8737	4.4474	2.9053			0.028	5.8042	10.429	2.4682
	0.0281	1.8443	4.3652	-0.18087			0.0281	6.0954	10.565	3.4272
	0.0282	1.7849	4.6222	-2.9806			0.0282	6.0084	10.454	-3.4167
	0.0283	1.6486	4.715	0.14283			0.0283	5.5247	10.353	-10.271
	0.0284	1.5046	4.5628	1.7452			0.0284	5.4616	10.325	-7.2641
	0.0285	1.5185	4.4991	-0.0017789			0.0285	5.3329	10.392	-2.2091
	0.0286	1.5906	4.6407	0.032954			0.0286	5.3004	10.468	1.7451
	0.0287	1.6739	4.5991	3.6325			0.0287	5.1969	10.594	4.1407
	0.0288	1.8742	4.6015	5.0469			0.0288	4.8905	10.467	1.7788
	0.0289	1.9679	4.4932	1.3054			0.0289	4.9007	10.397	0.99763
	0.029	1.9458	4.3063	-4.3521			0.029	4.7239	10.614	2.1005
	0.0291	1.8756	4.5041	-6.3506			0.0291	4.5464	10.708	-0.30949
	0.0292	1.7568	4.612	-0.95747			0.0292	4.5113	10.663	-3.0615
	0.0293	1.9044	4.8241	0.39854			0.0293	4.7518	10.721	0.11839
	0.0294	1.8989	4.7721	-5.4209			0.0294	4.7094	10.764	3.8319
	0.0295	1.6336	4.3708	-8.358			0.0295	4.2529	10.587	2.4376
	0.0296	1.7691	4.3171	-4.8707			0.0296	4.1681	10.559	-4.2916
	0.0297	1.8213	4.5426	4.2301			0.0297	4.0817	10.706	-8.3273
	0.0298	1.6565	4.5873	9.8168			0.0298	4.1754	10.659	-6.759
	0.0299	1.7895	4.5338	5.5599			0.0299	4.5311	10.446	-0.335
	0.03	1.8607	4.6866	0.88371			0.03	4.1248	10.304	4.2328
	0.0301	1.702	4.7573	-0.15886			0.0301	3.5538	10.262	4.3507
	0.0302	1.5884	4.6737	-2.7663			0.0302	4.2688	10.142	2.9433
	0.0303	1.2099	4.7642	-2.1007			0.0303	4.7999	9.9476	2.4305
	0.0304	1.2248	4.8073	4.4603			0.0304	4.3841	9.8017	3.3558
	0.0305	1.6307	5.1091	10.727			0.0305	4.067	9.6724	3.6149
	0.0306	1.4015	5.2345	7.1492			0.0306	3.9764	9.6069	1.5844
	0.0307	0.61738	4.8119	-1.6079			0.0307	4.6353	9.2254	1.6536
	0.0308	-0.012671	4.9633	-6.2165			0.0308	4.7074	8.9837	0.1513
	0.0309	-0.26945	5.303	-3.6927			0.0309	4.4351	9.1251	-2.0806
	0.031	-0.29776	5.6214	-0.92055			0.031	4.4176	8.9904	0.23041
	0.0311	-0.70809	5.5904	-0.12729			0.0311	4.5886	8.7592	1.0472
	0.0312	-1.4276	5.3525	-0.24337			0.0312	4.829	8.5608	-0.77891
	0.0313	-1.991	5.5195	-2.0119			0.0313	4.5698	8.2472	-1.3678
	0.0314	-2.0986	5.6153	-5.3377			0.0314	4.3659	8.2388	-2.5255
	0.0315	-2.1569	5.7082	-0.9737			0.0315	4.5945	8.282	-3.9723
	0.0316	-2.7653	5.7727	6.3384			0.0316	4.6982	7.927	-4.2956
	0.0317	-3.1653	5.6105	5.6037			0.0317	4.3869	7.7817	-3.7419
	0.0318	-3.7591	5.5425	0.56138			0.0318	4.1912	7.9259	0.083576
	0.0319	-4.0723	5.8092	-1.5041			0.0319	4.257	7.904	7.869
	0.032	-3.7771	6.0071	0.51442			0.032	4.5116	7.5983	6.7965
	0.0321	-3.8631	5.9084	0.044379			0.0321	4.1597	7.6178	2.1135
	0.0322	-4.224	5.7077	-2.2672			0.0322	4.0217	7.9039	1.9067
	0.0323	-4.7285	5.76	1.1726			0.0323	4.1979	8.0101	0.26544
	0.0324	-5.2449	5.7598	2.4469			0.0324	3.9331	7.9376	-1.8913
	0.0325	-5.5131	5.6762	-3.1142			0.0325	3.7583	7.9184	-2.4086
	0.0326	-5.366	5.84	-7.4963			0.0326	3.4724	7.8736	-0.98601
	0.0327	-5.0402	5.7443	-6.2897			0.0327	3.4124	7.7816	1.6597
	0.0328	-5.4175	5.7587	-1.5931			0.0328	3.7288	7.8752	1.642
	0.0329	-6.0512	6.137	4.1175			0.0329	3.6138	7.8441	0.86211
	0.033	-5.8881	5.9368	5.3823			0.033	3.4013	7.6891	-0.58026
	0.0331	-5.7538	5.713	4.1159			0.0331	3.2666	7.7175	-4.8174
	0.0332	-5.6281	5.9127	2.6733			0.0332	3.066	7.9811	-6.3231
	0.0333	-5.4839	5.943	0.061923			0.0333	3.1811	8.0755	-5.7116
	0.0334	-5.4473	5.9895	-2.6971			0.0334	3.4236	7.7262	-0.44911
	0.0335	-5.4436	6.207	-5.3686			0.0335	3.3558	7.663	3.1706
	0.0336	-5.1695	6.1632	-4.451			0.0336	3.2541	7.8985	0.25047
	0.0337	-4.6457	6.025	1.9944			0.0337	3.0212	7.9508	-2.1865
	0.0338	-4.8203	5.8158	6.6933			0.0338	3.0847	7.9784	-2.9138
	0.0339	-5.2426	6.0622	2.5039			0.0339	3.5836	8.188	-3.0916
	0.034	-5.0489	6.4363	-6.1199			0.034	3.777	8.2207	4.0164
	0.0341	-4.4425	6.1837	-9.2346			0.0341	3.8614	7.9529	9.1242
	0.0342	-4.1527	5.9347	-2.4389			0.0342	3.978	7.7344	3.4724
	0.0343	-4.2936	5.9085	6.5922			0.0343	4.0394	7.7548	-4.7317
	0.0344	-4.5377	5.9922	8.8083			0.0344	4.1125	7.9565	-5.8284
	0.0345	-4.2578	6.1722	6.1528			0.0345	4.2497	7.963	-2.9439
	0.0346	-3.7888	6.2282	0.099391			0.0346	4.7094	7.7411	-3.0225
	0.0347	-3.568	6.1471	-8.308			0.0347	5.0042	7.4799	-0.27724
	0.0348	-3.5636	6.1689	-8.8133			0.0348	4.9583	7.3294	4.7817
	0.0349	-3.5751	6.0518	0.7611			0.0349	5.0224	7.5303	6.5594
	0.035	-3.5767	6.2189	10.975			0.035	5.4042	7.7914	3.9803
	0.0351	-3.349	6.4273	10.156			0.0351	5.6075	7.7045	2.7121
	0.0352	-3.0866	6.2164	1.4991			0.0352	5.4782	7.4283	0.25827
	0.0353	-3.1771	6.2914	-6.9974			0.0353	5.6537	7.5727	-3.0439
	0.0354	-3.1657	6.3068	-7.1029			0.0354	5.879	7.8233	-4.2816
	0.0355	-3.2315	5.9307	-2.0141			0.0355	6.1582	7.6852	-4.3128
	0.0356	-3.3517	5.8831	2.1754			0.0356	6.1553	7.546	-2.539
	0.0357	-3.3872	6.3491	2.7078			0.0357	6.1943	7.4542	0.5095
	0.0358	-3.2972	6.4485	0.65176			0.0358	6.2381	7.6775	3.0445
	0.0359	-3.5769	6.0413	-4.1848			0.0359	6.139	7.8083	3.821
	0.036	-3.7237	6.0163	-5.436			0.036	6.162	8.0948	4.7328
	0.0361	-3.5546	6.0813	-0.15315			0.0361	6.4505	8.244	3.7968
	0.0362	-3.5078	6.0311	2.9779			0.0362	6.6067	7.8869	-3.0411
	0.0363	-3.4706	6.0465	-0.2077			0.0363	6.16	7.9088	-6.8832
	0.0364	-3.8484	6.2538	-3.2297			0.0364	6.0747	8.1469	-3.7224
	0.0365	-4.2834	6.2684	-1.7375			0.0365	6.1227	8.47	1.9186
	0.0366	-4.2895	6.0581	-0.30141			0.0366	6.2637	8.6445	3.6225
	0.0367	-4.1991	6.1466	1.2473			0.0367	6.1699	8.3846	3.6922
	0.0368	-4.5136	6.2183	2.4734			0.0368	5.575	8.2721	3.6512
	0.0369	-4.6229	6.1614	3.1578			0.0369	5.4055	8.548	0.12529
	0.037	-4.698	6.242	3.1143			0.037	5.876	8.726	-2.6581
	0.0371	-5.1792	6.1529	-0.26234			0.0371	6.3411	8.7495	-0.21407
	0.0372	-5.0978	6.1663	-2.4269			0.0372	6.2146	8.6229	2.0496
	0.0373	-4.7056	6.1987	-1.8438			0.0373	5.9444	8.5938	2.1531
	0.0374	-4.7164	6.265	-0.51804			0.0374	5.7533	8.8131	1.7688
	0.0375	-4.9166	6.2889	0.59605			0.0375	5.6293	8.7551	-2.3458
	0.0376	-4.9632	6.3566	1.3621			0.0376	5.8095	8.772	-4.7919
	0.0377	-4.3315	6.5874	3.0206			0.0377	6.2059	8.8959	-0.93341
	0.0378	-3.9736	6.4886	3.5211			0.0378	6.4358	8.7964	2.8145
	0.0379	-4.0697	6.582	-0.23164			0.0379	6.3817	8.705	2.8872
	0.038	-3.9715	6.7561	-4.1816			0.038	6.5257	8.7089	3.7377
	0.0381	-3.4968	6.7131	-4.2817			0.0381	6.8231	8.7636	2.8998
	0.0382	-3.0089	6.7417	-2.4585			0.0382	6.5303	8.6885	-1.547
	0.0383	-2.822	6.7174	3.374			0.0383	6.7753	8.596	-3.6649
	0.0384	-2.6916	6.8189	7.7506			0.0384	7.3345	8.3995	-5.9293
	0.0385	-2.6166	6.8569	6.7883			0.0385	7.2207	8.1194	-3.8541
	0.0386	-2.439	6.7864	5.2914			0.0386	7.698	8.2003	5.144
	0.0387	-2.0588	6.8641	2.553			0.0387	8.3247	8.5752	9.459
	0.0388	-1.4074	6.8789	-1.7413			0.0388	8.3049	8.5892	4.8423
	0.0389	-0.78523	6.6816	-7.7851			0.0389	8.3082	8.3098	-1.7367
	0.039	-0.62739	6.5103	-10.929			0.039	8.4746	8.0717	-4.3389
	0.0391	-0.61533	6.3772	-6.4997			0.0391	8.1482	8.1973	-2.1714
	0.0392	-0.16504	6.2958	-1.6222			0.0392	8.167	8.3087	-3.2867
	0.0393	0.20412	6.2927	0.46922			0.0393	8.5916	8.4091	-5.9547
	0.0394	0.56752	6.2943	7.0205			0.0394	8.3712	8.5793	-6.6769
	0.0395	0.36631	6.2974	8.7109			0.0395	8.1536	8.4464	-4.4811
	0.0396	-0.35087	5.879	-0.3016			0.0396	8.2997	8.3604	2.644
	0.0397	-0.023298	5.5064	-4.6265			0.0397	8.2014	8.2033	7.5138
	0.0398	0.53448	5.5204	1.2722			0.0398	7.9937	8.1933	8.0768
	0.0399	0.41586	5.7962	3.5119			0.0399	7.5741	8.3916	3.8755
	0.04	-0.076235	5.754	-2.5009			0.04	7.1258	8.2741	-1.3484
	0.0401	-0.047316	5.399	-7.5996			0.0401	7.4249	8.2323	-1.8927
	0.0402	-0.31259	5.2729	-6.9925			0.0402	7.6185	8.1086	-4.4923
	0.0403	-0.85747	5.1617	-2.4844			0.0403	7.0675	7.711	-8.3248
	0.0404	-0.82107	5.0266	3.858			0.0404	6.5132	7.861	-6.6969
	0.0405	-1.0959	5.1654	8.4929			0.0405	6.3659	7.87	0.4446
	0.0406	-1.3696	5.0414	6.5075			0.0406	6.3459	7.7512	3.1778
	0.0407	-1.5572	4.8682	1.1357			0.0407	6.5352	7.6807	1.9534
	0.0408	-1.6624	4.8006	-2.6156			0.0408	6.421	7.244	5.1856
	0.0409	-1.8506	4.5309	-6.1606			0.0409	5.5338	6.9071	4.3416
	0.041	-2.4447	4.6552	-6.1613			0.041	5.0914	6.8045	-2.0738
	0.0411	-2.787	4.7091	1.187			0.0411	5.0151	7.0423	-6.9119
	0.0412	-3.0171	4.8046	7.9783			0.0412	5.0075	6.9291	-7.4493
	0.0413	-3.4725	4.9097	5.0294			0.0413	4.8467	6.2632	-1.4055
	0.0414	-4.0987	4.5483	-1.755			0.0414	4.9975	6.1413	4.949
	0.0415	-4.3436	4.475	-0.31057			0.0415	5.3022	6.5097	6.2209
	0.0416	-4.404	4.7198	0.56528			0.0416	5.0624	6.201	4.4588
	0.0417	-4.624	5.0263	-2.7424			0.0417	5.183	5.6045	2.5527
	0.0418	-4.4505	4.9473	-3.8809			0.0418	5.3176	5.5157	1.6095
	0.0419	-4.3329	4.8193	-2.4689			0.0419	5.44	5.6973	-1.7893
	0.042	-4.7776	5.1492	0.48341			0.042	5.3029	5.5257	-4.3177
	0.0421	-5.0337	5.1043	2.9067			0.0421	5.4699	5.1513	-2.7541
	0.0422	-4.3338	4.9579	3.973			0.0422	6.0379	5.0062	3.1156
	0.0423	-4.3523	4.8099	1.2353			0.0423	6.3375	4.8364	3.0914
	0.0424	-4.9319	4.8819	-2.4968			0.0424	6.4465	4.6183	0.069807
	0.0425	-4.5958	5.1906	1.3683			0.0425	6.332	4.4899	1.239
	0.0426	-3.9142	5.0774	3.064			0.0426	6.3991	4.3385	3.7459
	0.0427	-3.768	4.7541	-1.8801			0.0427	6.37	4.2	2.337
	0.0428	-4.2104	4.805	-4.0055			0.0428	6.4165	4.5682	-2.2029
	0.0429	-4.1739	5.0673	-0.35896			0.0429	6.728	4.7162	-5.7621
	0.043	-3.8075	4.9589	3.9964			0.043	6.7412	4.3832	-4.2038
	0.0431	-3.5505	4.8716	6.0944			0.0431	6.8443	4.029	0.93592
	0.0432	-3.4909	4.8787	-0.12835			0.0432	7.0027	4.159	4.6618
	0.0433	-3.5452	4.9164	-6.8626			0.0433	7.3771	4.4623	6.8021
	0.0434	-3.5224	4.8876	-5.0655			0.0434	7.3292	4.4709	4.8043
	0.0435	-3.3011	4.8639	1.9011			0.0435	7.006	4.6441	-3.0933
	0.0436	-3.2829	4.9313	6.0142			0.0436	7.1094	4.7684	-7.009
	0.0437	-3.5109	4.7443	2.7065			0.0437	7.2702	4.734	-5.935
	0.0438	-3.3778	4.6541	-0.18382			0.0438	7.4596	4.8463	-6.5017
	0.0439	-3.1297	4.5657	1.4929			0.0439	7.3818	4.8705	-5.3441
	0.044	-3.2736	4.4481	0.034131			0.044	6.9821	4.6488	-0.63422
	0.0441	-3.5423	4.4383	-2.5135			0.0441	6.49	5.0495	3.0913
	0.0442	-3.661	4.5266	-1.0391			0.0442	6.4879	5.2839	4.7947
	0.0443	-4.0344	4.515	-0.48739			0.0443	6.744	5.2685	2.9415
	0.0444	-4.2913	4.4211	-3.8941			0.0444	6.4862	5.5695	-2.3386
	0.0445	-4.3694	4.3221	-8.3317			0.0445	6.0565	5.5483	-3.7625
	0.0446	-4.3787	3.9797	-8.482			0.0446	6.0102	5.6456	2.5293
	0.0447	-4.6355	4.0923	-4.1951			0.0447	5.963	5.8116	6.8024
	0.0448	-4.9925	4.4035	1.8712			0.0448	6.0438	5.9512	4.3936
	0.0449	-5.0667	4.5661	5.9458			0.0449	6.2486	5.9601	2.9146
	0.045	-5.2659	4.5862	7.1336			0.045	6.1829	5.9945	3.8421
	0.0451	-5.5733	4.3577	4.3242			0.0451	5.8476	6.0908	2.9903
	0.0452	-5.6321	4.4549	2.2479			0.0452	5.6229	5.9721	1.3605
	0.0453	-5.7458	4.6938	1.8693			0.0453	5.9454	5.9615	-0.077461
	0.0454	-5.781	4.656	-1.1456			0.0454	6.0809	6.0263	-1.3615
	0.0455	-5.6997	4.5637	-3.4804			0.0455	6.0867	6.1421	-5.6866
	0.0456	-5.6974	4.5654	-1.3885			0.0456	5.9684	6.1962	-8.9607
	0.0457	-5.6887	4.4839	1.591			0.0457	5.6532	5.9324	-8.5998
	0.0458	-5.9675	4.5597	-1.951			0.0458	5.874	5.8161	-5.1779
	0.0459	-6.0758	4.8079	-6.6284			0.0459	6.0621	6.0328	0.26113
	0.046	-6.0124	4.8718	-4.7663			0.046	5.8343	6.4392	6.5707
	0.0461	-5.9869	4.6686	1.7729			0.0461	5.8332	6.8296	10.035
	0.0462	-5.7789	4.5326	7.3102			0.0462	6.0823	6.8458	4.888
	0.0463	-5.641	4.7802	9.7528			0.0463	6.1079	6.9218	-0.34036
	0.0464	-5.5399	4.7051	5.6972			0.0464	6.2224	7.3103	-2.5047
	0.0465	-5.5958	4.6465	-3.417			0.0465	6.1942	7.7478	-3.8583
	0.0466	-5.697	4.8507	-6.4662			0.0466	6.0169	7.9406	-3.2125
	0.0467	-5.5483	4.6026	-1.0517			0.0467	5.8423	8.2734	-0.58543
	0.0468	-5.3733	4.6077	1.2029			0.0468	5.8816	8.8166	-0.074724
	0.0469	-5.2263	4.7533	1.2794			0.0469	6.0051	9.32	-0.61698
	0.047	-4.8986	4.6963	0.74247			0.047	5.8394	9.7565	-0.89289
	0.0471	-4.9911	4.7605	-2.8276			0.0471	5.8871	10.277	2.0256
	0.0472	-5.1689	4.7372	-4.4302			0.0472	5.4869	10.676	1.9675
	0.0473	-4.7026	4.4722	-1.9815			0.0473	4.8294	10.982	-1.5463
	0.0474	-4.4352	4.5456	-0.48687			0.0474	4.5632	11.716	-2.1522
	0.0475	-4.8244	4.5717	-0.43225			0.0475	4.3125	12.186	-0.46963
	0.0476	-5.2392	4.3718	1.08			0.0476	4.4908	12.785	1.4549
	0.0477	-5.5262	4.6545	2.9838			0.0477	4.4749	13.324	-0.2346
	0.0478	-5.3525	4.8091	-0.95009			0.0478	4.1624	13.529	0.059737
	0.0479	-5.1182	4.7357	-5.9514			0.0479	3.8932	14.26	2.456
	0.048	-4.9399	4.7509	-5.4236			0.048	3.3954	14.873	1.6306
	0.0481	-4.7402	5.0452	0.69511			0.0481	3.2127	15.18	-0.42757
	0.0482	-5.367	5.175	5.9418			0.0482	3.0973	15.602	2.5085
	0.0483	-5.6939	4.9177	8.7495			0.0483	2.9677	15.858	5.4911
	0.0484	-5.7324	4.8723	7.8157			0.0484	2.7467	16.119	5.3235
	0.0485	-5.6729	5.1622	1.5579			0.0485	2.5016	16.612	2.1025
	0.0486	-5.4063	5.3537	-2.8806			0.0486	2.7107	17.098	-3.937
	0.0487	-5.3975	5.4972	0.029928			0.0487	2.6196	17.332	-8.09
	0.0488	-5.706	5.6364	0.76203			0.0488	2.48	17.272	-7.1631
	0.0489	-6.2089	5.5774	-3.6107			0.0489	2.549	17.198	-0.97077
	0.049	-6.2367	5.5212	-6.3654			0.049	2.3616	17.322	2.9482
	0.0491	-6.2648	5.4195	-2.8616			0.0491	2.5656	17.728	2.3965
	0.0492	-6.3632	5.6273	4.0383			0.0492	2.8198	17.928	2.1891
	0.0493	-6.6463	5.8913	2.1899			0.0493	2.5442	17.674	1.3546
	0.0494	-7.2786	6.1652	-3.8024			0.0494	2.8667	17.491	-2.8711
	0.0495	-7.22	6.26	-3.9583			0.0495	3.6605	17.24	-5.1018
	0.0496	-7.0758	6.166	-1.6564			0.0496	3.7958	17.268	-5.2674
	0.0497	-7.39	6.2489	4.258			0.0497	3.4747	17.179	-4.2321
	0.0498	-7.5025	6.0637	9.9452			0.0498	3.4228	16.697	-0.22184
	0.0499	-7.6858	6.1158	8.7134			0.0499	3.7621	16.614	3.7907
	0.05	-8.1673	6.4594	3.1336			0.05	4.219	16.479	5.2992
	0.0501	-8.0266	6.3643	-4.3001			0.0501	4.398	16.397	4.6352
	0.0502	-7.8118	6.08	-6.4165			0.0502	4.285	16.318	-0.41385
	0.0503	-8.458	6.0044	-5.9519			0.0503	4.3736	15.736	-0.00090261
	0.0504	-8.7118	5.8053	-8.345			0.0504	4.6634	15.32	3.817
	0.0505	-8.8862	5.6687	-7.8512			0.0505	4.7605	15.421	6.3588
	0.0506	-9.4348	5.8012	-1.6969			0.0506	4.6593	15.265	5.9921
	0.0507	-9.7154	5.6915	5.8344			0.0507	4.7035	15.089	-0.54069
	0.0508	-9.8659	5.5011	7.6086			0.0508	4.6302	14.913	-6.9484
	0.0509	-10.32	5.5162	2.829			0.0509	4.5675	14.422	-6.1355
	0.051	-10.783	5.373	1.1331			0.051	4.8011	14.429	-2.2538
	0.0511	-10.897	5.1797	2.7586			0.0511	4.7776	14.67	-3.8589
	0.0512	-11.112	5.0663	0.78219			0.0512	4.4751	14.4	-6.5895
	0.0513	-11.471	5.0822	-0.969			0.0513	4.3424	14.102	-4.1045
	0.0514	-11.704	5.1627	-0.51887			0.0514	4.1049	14.134	-0.13902
	0.0515	-11.978	4.9899	-1.6765			0.0515	3.8681	14.087	1.6737
	0.0516	-12.316	4.8797	-2.206			0.0516	3.863	13.955	4.1564
	0.0517	-12.583	4.6634	2.4835			0.0517	3.9526	14.117	1.6237
	0.0518	-12.825	4.506	4.8074			0.0518	3.7403	14.182	1.1903
	0.0519	-12.847	4.7219	2.2087			0.0519	3.485	14.193	4.7106
	0.052	-12.877	4.5155	-0.92312			0.052	3.4794	14.39	0.8638
	0.0521	-13.107	4.2755	-4.44			0.0521	3.5828	14.185	-4.2613
	0.0522	-13.496	4.2921	-3.5449			0.0522	3.3704	14.214	-3.9205
	0.0523	-13.669	4.1286	-3.3597			0.0523	3.1033	14.551	-1.5267
	0.0524	-13.801	4.0785	-5.8223			0.0524	3.0989	14.393	0.91854
	0.0525	-13.821	4.3497	-2.08			0.0525	3.0577	14.029	2.4058
	0.0526	-13.739	4.4307	4.768			0.0526	3.3997	13.953	1.8519
	0.0527	-14.002	4.3532	7.5942			0.0527	3.4247	14.037	4.264
	0.0528	-14.276	4.4088	5.7451			0.0528	3.2358	14.173	8.0241
	0.0529	-14.085	4.2906	-0.14953			0.0529	3.2166	14.182	5.0973
	0.053	-13.852	4.336	-2.9694			0.053	3.5872	13.864	-0.114
	0.0531	-13.825	4.5398	-2.4544			0.0531	3.9966	13.427	-2.5001
	0.0532	-13.978	4.4824	-0.040054			0.0532	3.7357	13.296	-2.846
	0.0533	-14.09	4.5003	3.0076			0.0533	3.9366	13.488	-1.0067
	0.0534	-13.816	4.6476	-0.65819			0.0534	4.1848	13.455	1.4935
	0.0535	-13.364	4.7495	-5.8127			0.0535	4.2842	13.208	2.6307
	0.0536	-13.163	4.6321	-4.3562			0.0536	4.7839	13.094	0.061469
	0.0537	-13.339	4.4051	0.0021384			0.0537	5.0113	12.962	-4.8131
	0.0538	-13.446	4.5242	3.4493			0.0538	4.9798	12.926	-6.4173
	0.0539	-13.108	4.6777	4.2716			0.0539	5.1046	13.058	-4.3933
	0.054	-12.566	4.5515	1.3543			0.054	5.0284	12.8	-0.030306
	0.0541	-12.351	4.5085	0.58441			0.0541	5.2734	12.452	1.5012
	0.0542	-12.164	4.5803	3.0695			0.0542	5.6414	12.399	-0.48365
	0.0543	-12.062	4.4814	2.7468			0.0543	5.4746	12.569	-4.7091
	0.0544	-12.168	4.3618	-0.021416			0.0544	5.4579	12.393	-2.3024
	0.0545	-12.102	4.3741	-3.2183			0.0545	5.5971	12.174	3.0855
	0.0546	-11.686	4.6656	-3.9882			0.0546	5.6784	12.153	6.1554
	0.0547	-11.189	4.7444	-1.6327			0.0547	5.6576	11.931	6.8665
	0.0548	-11.045	4.3342	-0.92204			0.0548	5.4561	11.991	4.9302
	0.0549	-11.255	4.177	2.0879			0.0549	5.5319	12.04	3.4864
	0.055	-11.44	4.258	3.607			0.055	5.4566	11.969	0.32844
	0.0551	-11.39	4.3497	0.85509			0.0551	5.3457	11.882	-2.6427
	0.0552	-11.362	4.275	-2.8168			0.0552	5.1179	11.821	-0.53325
	0.0553	-11.397	3.9839	-0.22141			0.0553	4.8835	11.968	2.1795
	0.0554	-11.251	3.8397	0.56312			0.0554	4.9275	12.041	-2.7085
	0.0555	-11.202	3.8593	-0.44167			0.0555	4.522	11.922	-8.9013
	0.0556	-11.195	3.9351	4.2788			0.0556	4.1929	11.977	-3.868
	0.0557	-11.09	3.7697	5.6836			0.0557	3.9173	11.958	2.2332
	0.0558	-11.316	3.7651	-2.8309			0.0558	3.557	12.031	-1.3143
	0.0559	-11.531	3.7372	-12.291			0.0559	3.4622	12.256	-4.8187
	0.056	-11.49	3.4522	-12.78			0.056	3.4426	12.357	-2.5261
	0.0561	-11.227	3.2403	-5.7678			0.0561	3.2439	12.509	3.3376
	0.0562	-11.451	3.5091	3.7657			0.0562	3.1232	12.51	7.5425
	0.0563	-11.714	3.7957	8.5469			0.0563	2.6085	12.377	3.319
	0.0564	-11.52	3.4428	4.806			0.0564	2.1425	12.326	-2.8269
	0.0565	-11.423	3.2454	3.6169			0.0565	2.2406	12.91	-6.5748
	0.0566	-11.539	3.4237	6.3565			0.0566	2.3865	13.326	-3.8822
	0.0567	-11.568	3.3578	3.704			0.0567	2.2856	12.933	4.2923
	0.0568	-11.466	3.1297	0.1125			0.0568	1.9901	12.658	7.0783
	0.0569	-11.912	3.1205	-3.2067			0.0569	1.6206	13.117	3.9519
	0.057	-11.847	3.0955	-6.3682			0.057	1.3586	13.801	3.4811
	0.0571	-11.38	3.1544	-7.0143			0.0571	1.3733	13.934	0.9566
	0.0572	-11.319	3.0296	-3.4761			0.0572	1.3383	13.805	-5.1002
	0.0573	-11.175	3.1651	2.1422			0.0573	1.4457	13.686	-5.6682
	0.0574	-11.266	3.4263	4.1252			0.0574	1.2082	13.697	-1.0645
	0.0575	-11.267	3.3306	2.0291			0.0575	0.82869	14.077	-1.6725
	0.0576	-10.869	3.1105	-1.6553			0.0576	0.87997	14.446	-3.8059
	0.0577	-10.766	3.0146	-3.3531			0.0577	0.96486	14.717	-0.48723
	0.0578	-10.731	3.1164	-2.34			0.0578	0.96849	15.024	2.8878
	0.0579	-10.498	3.2871	-1.5046			0.0579	0.84851	14.885	3.4571
	0.058	-10.347	3.5493	2.4195			0.058	0.80017	14.697	0.32938
	0.0581	-10.237	3.4613	6.6254			0.0581	1.0155	14.871	-1.6114
	0.0582	-10.064	3.2103	2.9622			0.0582	0.92367	15.178	-0.89757
	0.0583	-9.8715	3.1576	-2.5671			0.0583	0.54086	15.256	-0.83102
	0.0584	-9.7838	3.1521	-2.1501			0.0584	0.34608	15.05	-0.73976
	0.0585	-9.8875	2.9663	0.19517			0.0585	0.17976	15.304	-0.11146
	0.0586	-9.4623	2.8723	-2.5125			0.0586	0.30554	15.851	1.1466
	0.0587	-8.9349	3.0242	-4.3479			0.0587	0.48242	15.846	1.83
	0.0588	-8.884	3.2355	-0.44255			0.0588	0.41266	15.586	2.679
	0.0589	-9.0053	3.3026	6.6575			0.0589	-0.0076761	15.553	1.9605
	0.059	-8.8146	3.0642	6.3814			0.059	-0.14391	15.694	0.84894
	0.0591	-8.3891	2.8653	2.1454			0.0591	0.15583	15.873	-0.11614
	0.0592	-8.2204	2.837	0.52605			0.0592	0.14925	15.843	-6.2376
	0.0593	-8.3155	2.7018	-0.2065			0.0593	-0.18037	15.783	-9.2062
	0.0594	-8.2635	2.5347	2.0079			0.0594	-0.082453	15.854	-2.9126
	0.0595	-7.7541	2.6061	5.0526			0.0595	-0.078411	15.833	8.3513
	0.0596	-7.637	2.6263	2.2188			0.0596	-0.20786	15.439	16.683
	0.0597	-7.6672	2.5009	-4.8497			0.0597	-0.17652	15.137	12.491
	0.0598	-7.5724	2.3116	-6.261			0.0598	-0.32246	15.29	1.8118
	0.0599	-7.6357	2.0981	-3.4833			0.0599	-0.35957	15.122	-2.5
	0.06	-7.6511	2.0889	-1.7385			0.06	-0.32167	14.824	-0.74473
	0.0601	-7.441	2.0202	-1.1105			0.0601	-0.37222	14.841	-4.45
	0.0602	-7.46	1.8407	0.78234			0.0602	-0.44763	14.88	-11.323
	0.0603	-7.8068	1.7552	2.3547			0.0603	-0.53458	14.835	-9.4418
	0.0604	-7.8778	1.8024	-1.382			0.0604	-0.6382	14.595	-4.0894
	0.0605	-7.8468	1.8101	-3.2451			0.0605	-0.70806	14.41	-3.0533
	0.0606	-7.7555	1.8019	0.20529			0.0606	-0.74357	14.425	-2.0049
	0.0607	-7.783	1.6394	2.5676			0.0607	-0.72532	14.386	3.1932
	0.0608	-7.9935	1.6484	2.9265			0.0608	-0.69934	14.295	5.729
	0.0609	-8.3175	1.8221	5.8502			0.0609	-0.63508	14.281	1.7216
	0.061	-8.1251	1.7018	10.474			0.061	-0.87307	14.278	-3.6491
	0.0611	-7.8396	1.5466	4.8906			0.0611	-1.0383	14.019	-2.4696
	0.0612	-8.057	1.43	-5.0882			0.0612	-0.98533	13.643	2.8727
	0.0613	-7.9854	1.6142	-8.397			0.0613	-0.89958	13.675	4.3618
	0.0614	-7.773	2.0164	-8.8718			0.0614	-1.1709	13.728	0.5525
	0.0615	-8.0012	2.0808	-4.1862			0.0615	-1.3756	13.716	-0.1074
	0.0616	-8.1022	1.9458	3.8268			0.0616	-1.5467	13.771	0.0032664
	0.0617	-7.4557	1.7519	3.7311			0.0617	-1.5534	13.816	-3.1373
	0.0618	-7.461	1.7689	-0.37501			0.0618	-1.3622	13.743	-2.9108
	0.0619	-7.967	2.132	-0.23138			0.0619	-1.5961	13.646	1.8457
	0.062	-7.482	2.4733	1.4485			0.062	-1.6724	13.804	2.4099
	0.0621	-7.2276	2.684	1.3929			0.0621	-1.887	14.096	-2.3384
	0.0622	-7.5795	2.5296	-1.1941			0.0622	-1.9026	14.102	-2.2817
	0.0623	-7.6105	2.4483	-0.643			0.0623	-1.7558	13.935	2.8045
	0.0624	-7.4165	2.5666	3.0074			0.0624	-1.826	14.062	6.516
	0.0625	-7.4698	2.7484	2.6555			0.0625	-1.6979	14.186	9.6622
	0.0626	-7.6482	3.0394	-1.563			0.0626	-1.6372	13.973	8.1016
	0.0627	-7.6064	3.1984	-6.9504			0.0627	-1.4376	13.857	-2.7182
	0.0628	-7.493	3.0303	-4.6392			0.0628	-1.3042	13.865	-12.153
	0.0629	-7.3976	2.9781	0.76207			0.0629	-1.4265	13.825	-11.139
	0.063	-7.5262	3.182	0.50738			0.063	-1.3141	13.889	-4.6045
	0.0631	-7.7936	3.1871	-1.8992			0.0631	-1.2647	13.723	-0.53044
	0.0632	-8.0516	3.1731	-3.1793			0.0632	-1.3122	13.473	2.1339
	0.0633	-8.1047	3.0018	-1.5543			0.0633	-1.2436	13.61	1.1779
	0.0634	-7.9347	2.8046	1.598			0.0634	-1.1171	13.515	1.8542
	0.0635	-8.0707	2.9775	-0.70288			0.0635	-0.83385	13.182	4.941
	0.0636	-8.7051	2.8922	-0.54844			0.0636	-0.96666	13.079	3.5437
	0.0637	-9.2065	2.7552	2.1224			0.0637	-1.0402	13.072	-3.3914
	0.0638	-9.0959	2.7751	-0.31826			0.0638	-0.76724	13.079	-9.1479
	0.0639	-9.4962	2.658	-2.6919			0.0639	-0.75045	12.823	-7.9877
	0.064	-10.443	2.3509	2.9846			0.064	-0.88209	12.629	-0.87094
	0.0641	-10.647	2.4475	8.8418			0.0641	-0.01209	12.242	5.5199
	0.0642	-10.845	2.5526	8.6447			0.0642	0.30184	12.028	6.7925
	0.0643	-11.183	2.2562	1.55			0.0643	-0.32634	12.14	8.5743
	0.0644	-11.746	2.0388	-7.9784			0.0644	-0.075932	12.111	10.485
	0.0645	-11.936	2.0341	-10.631			0.0645	0.027401	12.009	4.4819
	0.0646	-11.459	2.3818	-5.4935			0.0646	0.25815	11.735	-5.2668
	0.0647	-11.927	2.2813	1.3013			0.0647	0.61483	11.39	-6.776
	0.0648	-12.851	2.0033	4.5612			0.0648	0.4961	11.204	-2.7235
	0.0649	-12.553	1.897	4.8479			0.0649	0.40261	11.298	-0.55538
	0.065	-12.192	1.8894	5.8082			0.065	0.50288	11.402	-2.343
	0.0651	-12.239	2.0935	3.3502			0.0651	0.49215	11.469	-5.3088
	0.0652	-12.197	1.9679	-0.016898			0.0652	0.54872	11.598	-3.8355
	0.0653	-12.441	1.8625	1.2294			0.0653	0.50011	11.468	2.0175
	0.0654	-12.343	2.1514	1.4576			0.0654	0.31411	11.289	7.4309
	0.0655	-12.352	2.4891	-0.71488			0.0655	0.49669	11.531	7.655
	0.0656	-12.458	2.5883	-1.4242			0.0656	0.51058	11.466	2.0922
	0.0657	-12.098	2.5902	-2.0499			0.0657	0.35921	11.655	-4.569
	0.0658	-12.035	2.6546	-4.0269			0.0658	0.50404	12.16	-6.6437
	0.0659	-11.679	2.7529	-5.7811			0.0659	0.37029	12.276	-2.4164
	0.066	-11.055	2.916	-8.2659			0.066	0.034684	12.31	2.0076
	0.0661	-10.516	3.2083	-4.3145			0.0661	0.11157	12.301	1.8562
	0.0662	-10.066	3.4535	5.3833			0.0662	0.072546	12.25	-1.6101
	0.0663	-10.112	3.2326	9.3527			0.0663	0.21185	12.579	-2.0118
	0.0664	-9.294	3.4712	7.9179			0.0664	0.075633	13.147	2.491
	0.0665	-8.7604	3.8665	4.8582			0.0665	-0.45236	13.138	5.3426
	0.0666	-8.5137	3.7899	2.5938			0.0666	-0.5113	13.033	2.9391
	0.0667	-7.6142	3.9271	-0.94711			0.0667	-0.44189	13.396	-1.8163
	0.0668	-7.7287	3.9327	-6.5808			0.0668	-0.4012	13.693	-2.3002
	0.0669	-7.7751	3.8965	-7.9906			0.0669	-0.55991	13.733	-1.4699
	0.067	-7.1248	3.9352	-4.471			0.067	-0.79842	13.659	-3.5687
	0.0671	-6.8312	4.1001	1.6738			0.0671	-0.73501	13.741	-2.811
	0.0672	-6.5504	4.4009	5.9397			0.0672	-0.62826	13.883	-1.7291
	0.0673	-6.4407	4.4988	1.2145			0.0673	-0.67166	14.022	-3.3373
	0.0674	-6.799	4.5071	-4.5843			0.0674	-0.53684	14.259	0.13872
	0.0675	-6.5822	4.383	-3.4367			0.0675	-0.50596	14.406	7.0941
	0.0676	-6.3629	4.4525	0.68344			0.0676	-0.56305	14.426	9.14
	0.0677	-6.317	4.4469	1.7992			0.0677	-0.47202	14.3	7.1605
	0.0678	-6.1998	4.536	0.33658			0.0678	-0.39558	13.894	3.366
	0.0679	-6.6623	4.7695	-0.82009			0.0679	-0.65052	13.846	-0.67457
	0.068	-6.8472	4.5777	-1.5877			0.068	-0.55697	14.367	-5.0631
	0.0681	-6.5777	4.4088	-1.6508			0.0681	0.090247	14.594	-6.8885
	0.0682	-6.6269	4.5495	-3.4003			0.0682	0.1363	14.482	-8.5744
	0.0683	-7.381	4.7806	-1.3355			0.0683	0.059568	14.233	-7.5644
	0.0684	-7.7566	4.6423	-0.37486			0.0684	0.45136	14.228	-1.7228
	0.0685	-7.8692	4.3201	-2.2775			0.0685	0.46412	14.404	0.12242
	0.0686	-8.505	4.3957	1.4911			0.0686	-0.14391	14.418	-1.4192
	0.0687	-8.8774	4.4855	5.403			0.0687	-0.10387	14.383	1.1508
	0.0688	-8.6828	4.5697	6.746			0.0688	0.45692	14.25	7.0652
	0.0689	-8.7435	4.7482	5.2497			0.0689	0.80421	14.134	12.906
	0.069	-9.025	4.6617	0.20419			0.069	0.88953	14.212	10.117
	0.0691	-9.4759	4.4802	-3.0135			0.0691	0.7211	14.403	-1.3914
	0.0692	-9.9161	4.5694	0.78119			0.0692	0.49216	14.635	-9.5161
	0.0693	-9.9431	4.7695	6.314			0.0693	0.59813	14.547	-7.5038
	0.0694	-10.011	4.9411	4.9653			0.0694	1.0479	14.418	-3.0008
	0.0695	-10.144	4.9407	-2.8164			0.0695	0.95694	14.397	1.3681
	0.0696	-10.103	4.6218	-9.5171			0.0696	0.66714	14.172	5.8983
	0.0697	-10.049	4.5995	-6.2986			0.0697	0.71078	14.288	6.8596
	0.0698	-10.244	4.8569	-0.73502			0.0698	0.89809	14.549	2.9342
	0.0699	-10.343	4.9221	0.33141			0.0699	0.83088	14.595	-4.2065
	0.07	-10.225	4.9662	3.0543			0.07	0.58227	14.551	-9.5028
	0.0701	-10.349	4.8614	5.4175			0.0701	0.59836	14.454	-7.5645
	0.0702	-10.443	4.6366	1.5037			0.0702	0.71251	14.328	-1.7393
	0.0703	-10.129	4.7258	-3.7817			0.0703	0.70078	14.332	4.5654
	0.0704	-10.063	4.6109	-1.0031			0.0704	0.44787	14.304	3.9311
	0.0705	-10.188	4.4366	0.17357			0.0705	0.17641	14.171	-0.58784
	0.0706	-9.9668	4.2246	-3.1041			0.0706	-0.34499	14.185	-1.0906
	0.0707	-9.7129	4.1323	-1.436			0.0707	-0.4725	14.188	0.90399
	0.0708	-9.8287	4.3182	0.4953			0.0708	-0.0087698	14.106	-0.84478
	0.0709	-10.019	4.1331	1.2494			0.0709	-0.085091	13.823	-3.1248
	0.071	-10.048	4.092	3.0956			0.071	-0.30951	13.779	0.24935
	0.0711	-10.062	4.2288	2.9026			0.0711	-0.72373	13.987	2.1144
	0.0712	-9.8564	3.968	-2.5831			0.0712	-0.806	14.053	2.2363
	0.0713	-9.8726	3.6364	-5.1507			0.0713	-0.57332	13.867	2.2504
	0.0714	-10.088	3.472	-1.976			0.0714	-0.85535	13.625	3.0536
	0.0715	-10.04	3.3541	2.331			0.0715	-1.3347	13.599	5.4998
	0.0716	-9.8348	3.4312	5.1362			0.0716	-1.5717	13.506	3.3929
	0.0717	-10.215	3.3481	5.103			0.0717	-1.289	13.523	-2.7459
	0.0718	-10.547	3.2559	-0.52474			0.0718	-1.0684	13.602	-5.2446
	0.0719	-10.203	3.3578	-4.24			0.0719	-1.3133	13.417	-1.7988
	0.072	-10.429	3.1266	-1.1848			0.072	-1.2885	13.336	1.9075
	0.0721	-10.714	2.8315	5.7686			0.0721	-1.2556	13.399	3.2858
	0.0722	-10.827	2.579	9.255			0.0722	-1.4588	13.197	3.0127
	0.0723	-10.885	2.6859	-2.4808			0.0723	-1.1656	13.071	1.097
	0.0724	-11.015	2.9382	-11.93			0.0724	-0.65086	13.057	-0.41781
	0.0725	-11.079	3.0993	-8.5781			0.0725	-1.0458	13.366	-3.0938
	0.0726	-10.972	2.9548	-4.6144			0.0726	-1.1086	13.492	-6.9178
	0.0727	-11.039	2.582	0.16797			0.0727	-0.60665	13.076	-7.873
	0.0728	-11.012	2.9812	2.4202			0.0728	-0.52132	12.988	-4.7472
	0.0729	-11.24	3.2635	1.7526			0.0729	-0.2842	13.199	0.98939
	0.073	-11.512	3.0957	5.495			0.073	-0.11543	13.348	5.4684
	0.0731	-11.538	2.9753	10.138			0.0731	-0.062039	13.15	5.9325
	0.0732	-11.579	3.0038	8.7355			0.0732	-0.35632	12.912	3.4845
	0.0733	-11.456	3.16	0.48305			0.0733	-0.35982	12.795	-0.9291
	0.0734	-11.1	3.3261	-10.603			0.0734	0.32381	12.853	-3.7321
	0.0735	-11.187	3.4607	-11.965			0.0735	0.69044	12.919	-2.3316
	0.0736	-11.535	3.3872	-1.8292			0.0736	0.60894	12.775	2.4569
	0.0737	-11.702	3.1583	7.3442			0.0737	0.46822	12.694	5.0411
	0.0738	-11.789	3.0865	8.0413			0.0738	0.46595	12.506	1.5914
	0.0739	-11.422	3.2421	2.7746			0.0739	0.87162	12.363	-6.8843
	0.074	-11.228	3.5772	-4.5314			0.074	1.1825	12.248	-10.978
	0.0741	-11.324	3.6891	-6.616			0.0741	1.2795	12.213	-7.7402
	0.0742	-11.829	3.4922	-2.9038			0.0742	1.2704	12.308	-1.71
	0.0743	-11.904	3.2203	-2.4659			0.0743	1.5654	11.972	2.9737
	0.0744	-11.475	2.9088	-5.9789			0.0744	1.4679	11.742	5.5655
	0.0745	-11.715	2.9146	-1.7402			0.0745	1.1786	11.623	7.2719
	0.0746	-11.798	3.1052	4.163			0.0746	1.4004	11.543	9.2227
	0.0747	-11.66	3.053	3.8785			0.0747	1.4508	11.504	6.8113
	0.0748	-11.785	2.9135	4.9056			0.0748	1.3991	11.127	-2.2181
	0.0749	-12.001	2.5762	6.5035			0.0749	1.3077	10.929	-8.3483
	0.075	-11.938	2.236	2.2732			0.075	1.3852	10.595	-1.6381
	0.0751	-12.136	2.1334	-4.4308			0.0751	1.2862	10.138	6.0278
	0.0752	-12.638	2.0853	-6.5164			0.0752	1.2309	10.048	1.1208
	0.0753	-12.643	1.9553	-1.4297			0.0753	1.3406	10.187	-5.3544
	0.0754	-12.283	1.631	3.5316			0.0754	0.96094	10.228	-3.7773
	0.0755	-12.416	1.7502	0.19902			0.0755	0.48644	10.197	-0.10047
	0.0756	-12.799	1.7825	-2.8482			0.0756	0.51585	9.9654	0.90948
	0.0757	-12.879	1.6473	-1.3204			0.0757	0.74712	9.6437	2.6317
	0.0758	-13.085	1.3802	-0.10066			0.0758	0.67527	9.5286	4.5807
	0.0759	-13.105	1.1877	-0.67009			0.0759	0.2861	9.4585	0.76472
	0.076	-13.22	1.3344	1.7558			0.076	0.11621	9.6939	-3.3471
	0.0761	-13.656	1.3673	7.4006			0.0761	0.1469	9.7453	-1.0227
	0.0762	-13.688	1.3283	6.6172			0.0762	-0.15945	9.9003	1.305
	0.0763	-13.781	1.1506	1.8026			0.0763	-0.41849	9.9581	2.7398
	0.0764	-13.85	1.384	-1.4127			0.0764	-0.52803	9.8124	2.4407
	0.0765	-13.762	1.6262	-1.546			0.0765	-0.56266	9.8346	1.4549
	0.0766	-13.992	1.6156	-1.5951			0.0766	-0.68079	9.8536	1.4564
	0.0767	-14.067	1.4687	-6.8545			0.0767	-0.86208	10.263	-1.3604
	0.0768	-14.151	1.5263	-9.5455			0.0768	-0.74386	10.358	-2.4191
	0.0769	-14.477	2.1261	-3.0336			0.0769	-1.0172	10.236	-1.4408
	0.077	-14.492	2.2879	3.9708			0.077	-1.2907	10.515	-3.593
	0.0771	-14.324	2.2968	4.8241			0.0771	-1.382	10.822	-4.2793
	0.0772	-14.453	2.2823	0.15894			0.0772	-1.0858	11.024	1.6095
	0.0773	-14.862	2.3092	-0.57796			0.0773	-0.9874	11.226	5.152
	0.0774	-15.123	2.6833	1.7317			0.0774	-1.3591	11.26	1.6482
	0.0775	-15.18	2.9629	1.8664			0.0775	-1.0847	11.082	-2.6582
	0.0776	-15.228	3.0785	3.738			0.0776	-1.3212	11.228	-4.619
	0.0777	-15.264	3.1489	7.6983			0.0777	-1.7459	11.635	-4.3799
	0.0778	-15.562	3.1891	8.6447			0.0778	-1.5274	11.749	-0.72856
	0.0779	-15.971	3.2887	1.8262			0.0779	-1.3012	11.655	2.0236
	0.078	-16.133	3.38	-4.6718			0.078	-1.5098	11.549	1.4727
	0.0781	-16.03	3.6016	-5.1255			0.0781	-1.5108	11.724	2.7051
	0.0782	-16.36	3.5891	-6.3226			0.0782	-1.2434	11.8	6.5509
	0.0783	-16.915	3.3686	-8.992			0.0783	-1.5003	11.521	5.7916
	0.0784	-17.218	3.6856	-7.6656			0.0784	-1.6408	11.573	-0.38356
	0.0785	-17.206	4.1106	-2.7326			0.0785	-1.6703	11.54	-6.4481
	0.0786	-17.396	4.063	1.7751			0.0786	-1.889	11.473	-7.1447
	0.0787	-17.859	4.0184	4.134			0.0787	-1.8225	11.476	-1.7267
	0.0788	-18.327	4.2273	2.3732			0.0788	-1.7383	11.181	5.0885
	0.0789	-19.162	4.3306	-0.71433			0.0789	-1.6757	10.951	6.3003
	0.079	-19.844	4.2663	0.26804			0.079	-1.2931	10.695	-0.3161
	0.0791	-20.143	4.2875	2.8626			0.0791	-1.5436	10.61	-6.2545
	0.0792	-20.645	4.5884	3.127			0.0792	-1.8276	10.603	-6.8714
	0.0793	-21.229	4.7	0.12774			0.0793	-1.475	10.251	-2.6706
	0.0794	-21.767	4.7107	1.0723			0.0794	-1.4383	9.9471	2.5624
	0.0795	-22.256	4.7768	0.58336			0.0795	-1.4936	9.6729	5.55
	0.0796	-22.837	4.8569	-4.5791			0.0796	-1.2913	9.3136	6.196
	0.0797	-23.634	4.8057	-4.9915			0.0797	-1.1254	9.1198	1.732
	0.0798	-24.025	4.9333	-2.5788			0.0798	-1.0023	8.9901	-6.1976
	0.0799	-24.338	5.3499	-3.2983			0.0799	-0.69406	8.6687	-8.8158
	0.08	-24.798	5.5031	-2.6796			0.08	-0.45014	8.1687	-5.5602
	0.0801	-25.131	5.3157	3.6165			0.0801	-0.65756	7.8667	-3.315
	0.0802	-25.398	5.2787	8.8198			0.0802	-0.51024	7.5589	-2.0418
	0.0803	-25.896	5.7247	5.4443			0.0803	-0.34538	7.4689	0.4776
	0.0804	-26.429	5.8262	1.4334			0.0804	-0.24804	7.3411	5.9717
	0.0805	-26.855	5.9352	0.72635			0.0805	-0.010355	6.9853	11.422
	0.0806	-27.13	6.3509	-3.1435			0.0806	-0.27691	6.6612	5.0499
	0.0807	-27.225	6.362	-6.5084			0.0807	0.11444	6.3569	-3.4067
	0.0808	-27.516	6.274	-7.6131			0.0808	0.7544	6.3829	-4.3377
	0.0809	-28.161	6.659	-1.9976			0.0809	0.79863	6.482	1.8293
	0.081	-28.48	6.9021	8.0126			0.081	0.58389	6.2119	3.6803
	0.0811	-28.549	6.6535	14.624			0.0811	0.33096	5.9028	1.5343
	0.0812	-28.872	6.8195	14.975			0.0812	0.41023	5.9019	1.1584
	0.0813	-28.776	7.2112	8.0265			0.0813	0.38336	5.8419	1.4888
	0.0814	-28.763	7.2579	-2.2909			0.0814	0.69495	6.093	-0.74103
	0.0815	-29.203	7.3154	-9.524			0.0815	0.97672	6.3731	-1.0122
	0.0816	-29.154	7.2156	-9.673			0.0816	0.48115	6.2755	-0.12511
	0.0817	-28.946	7.1673	-8.305			0.0817	-0.024923	6.0308	-0.94522
	0.0818	-29.037	7.2782	-7.2253			0.0818	-0.15443	5.9327	-1.1019
	0.0819	-29.359	7.2847	-0.58354			0.0819	0.15367	6.1029	0.51348
	0.082	-29.283	7.4128	5.0505			0.082	0.38147	6.2289	0.71468
	0.0821	-29.094	7.3677	5.5629			0.0821	-0.11646	6.3774	-0.71331
	0.0822	-29.117	7.2616	0.32964			0.0822	-0.56483	6.647	-2.3833
	0.0823	-29.258	7.2852	-5.4147			0.0823	-0.35591	6.6479	-2.1076
	0.0824	-29.379	7.4358	-4.6385			0.0824	-0.40677	6.7319	2.085
	0.0825	-29.396	7.2793	-2.5674			0.0825	-0.6412	6.9288	4.9977
	0.0826	-29.328	6.9082	-1.1914			0.0826	-0.64825	6.7277	3.2068
	0.0827	-29.143	6.8891	2.1741			0.0827	-0.84956	6.9368	-3.1509
	0.0828	-29.192	7.0281	3.3392			0.0828	-0.82616	7.4092	-7.2152
	0.0829	-29.266	7.0647	1.8682			0.0829	-1.0128	7.456	-0.19448
	0.083	-29.23	6.8469	3.6657			0.083	-1.6639	7.5673	4.2303
	0.0831	-29.127	6.7631	7.2773			0.0831	-1.8821	7.5865	-1.0119
	0.0832	-28.931	6.8742	4.7663			0.0832	-1.5985	7.6783	-5.2201
	0.0833	-28.678	6.6928	-2.0125			0.0833	-1.706	8.2818	-4.0723
	0.0834	-28.563	6.3716	-2.5778			0.0834	-2.0913	8.2994	0.94302
	0.0835	-28.668	6.483	1.5077			0.0835	-1.7553	7.96	4.7266
	0.0836	-28.797	6.6159	0.72873			0.0836	-1.478	7.9774	3.4488
	0.0837	-28.932	6.5307	-3.6924			0.0837	-1.6368	8.3548	-0.81101
	0.0838	-29.016	6.4833	-2.5629			0.0838	-1.9553	8.4815	-2.519
	0.0839	-28.827	6.4564	-2.611			0.0839	-2.0786	8.4049	0.10305
	0.084	-29.097	6.6698	-4.305			0.084	-1.8568	8.5285	2.4822
	0.0841	-29.522	6.8772	-2.5154			0.0841	-1.1776	8.6998	4.1914
	0.0842	-29.51	6.5873	-0.52629			0.0842	-0.78221	8.8493	1.9804
	0.0843	-29.658	6.3922	-0.29148			0.0843	-1.2192	8.784	-3.8838
	0.0844	-30.132	6.5854	-2.5943			0.0844	-1.1274	8.753	-4.0882
	0.0845	-30.564	6.5785	-2.9523			0.0845	-0.95905	8.912	-1.4928
	0.0846	-30.596	6.6126	0.013125			0.0846	-0.6748	9.0303	-2.3749
	0.0847	-30.94	6.7049	4.1214			0.0847	-0.28017	9.0556	-5.0052
	0.0848	-31.51	6.5934	7.7419			0.0848	-0.61204	9.247	-3.0474
	0.0849	-31.689	6.5233	3.9647			0.0849	-0.59025	9.2824	1.1793
	0.085	-32.03	6.4709	-3.2299			0.085	-0.13341	9.2007	4.1164
	0.0851	-32.493	6.3697	-5.915			0.0851	0.17288	9.1843	3.9038
	0.0852	-32.865	6.1304	-2.4663			0.0852	0.52644	9.1875	0.95878
	0.0853	-33.282	6.171	0.68948			0.0853	0.88044	9.2475	-2.0607
	0.0854	-33.792	6.3342	0.76752			0.0854	0.76506	9.468	-2.1993
	0.0855	-34.432	6.2842	-0.02267			0.0855	0.54438	9.4409	2.3762
	0.0856	-34.997	6.1546	2.5885			0.0856	0.64466	9.2973	7.3774
	0.0857	-35.154	5.6593	6.5587			0.0857	0.77342	9.323	5.9828
	0.0858	-35.434	5.5425	4			0.0858	0.79963	9.5226	1.5929
	0.0859	-36.033	5.5439	-0.86112			0.0859	0.997	9.6571	0.073727
	0.086	-36.322	5.5716	1.91			0.086	1.1572	9.659	-2.6747
	0.0861	-36.681	5.5403	4.8109			0.0861	1.241	9.932	-5.4742
	0.0862	-37.292	4.9937	-1.4568			0.0862	1.1723	9.8905	-3.9353
	0.0863	-37.442	4.8197	-8.4174			0.0863	0.97307	9.7158	-3.7799
	0.0864	-37.553	5.0939	-8.9579			0.0864	0.69817	9.7917	-1.8235
	0.0865	-37.806	5.1871	-4.972			0.0865	0.76027	9.916	4.6351
	0.0866	-37.85	4.8638	-1.528			0.0866	1.1598	10.196	8.9571
	0.0867	-38.125	4.4408	0.72109			0.0867	1.104	10.102	7.1541
	0.0868	-38.381	4.5922	1.8221			0.0868	1.0074	10.141	-0.24647
	0.0869	-38.428	4.8126	2.3147			0.0869	0.81604	10.495	-3.738
	0.087	-38.616	4.8115	-1.1161			0.087	0.78796	10.598	-3.8342
	0.0871	-38.439	4.879	-1.171			0.0871	1.1588	10.488	-6.9656
	0.0872	-37.94	4.9839	5.3663			0.0872	1.1664	10.264	-5.7303
	0.0873	-37.813	5.0447	5.3633			0.0873	1.0583	10.229	-1.1031
	0.0874	-38.053	5.0918	-0.879			0.0874	0.87575	10.339	2.3689
	0.0875	-37.948	5.2727	-4.0464			0.0875	1.09	10.505	1.8338
	0.0876	-37.385	5.3408	-3.0037			0.0876	1.6056	10.805	-0.72725
	0.0877	-36.742	5.6611	-1.4409			0.0877	1.635	10.926	-1.8659
	0.0878	-36.416	6.1558	-3.1425			0.0878	1.5667	10.758	-3.5117
	0.0879	-36.475	6.3353	-3.4218			0.0879	1.7281	10.699	-1.6734
	0.088	-36.116	6.3376	1.9567			0.088	1.8042	10.648	5.7459
	0.0881	-35.585	6.6152	2.3368			0.0881	1.924	10.583	11.602
	0.0882	-35.376	7.0588	1.6349			0.0882	2.0713	10.959	9.1851
	0.0883	-34.915	7.3684	9.9577			0.0883	2.2096	11.276	1.5957
	0.0884	-34.085	7.5358	15.309			0.0884	2.3198	11.141	-5.9612
	0.0885	-33.77	7.9038	8.384			0.0885	2.1058	11.173	-10.65
	0.0886	-33.564	8.2539	-0.37865			0.0886	2.5436	11.264	-7.0438
	0.0887	-33.322	8.4669	-5.3388			0.0887	2.6053	11.188	0.16577
	0.0888	-33.038	8.5732	-7.2912			0.0888	2.0874	11.276	7.6577
	0.0889	-32.306	8.6405	-7.9083			0.0889	2.5371	11.531	9.0172
	0.089	-31.463	8.9061	-6.4247			0.089	2.8769	11.496	4.8135
	0.0891	-31.31	9.0268	-0.82514			0.0891	2.0125	11.372	4.648
	0.0892	-31.24	9.1384	3.4995			0.0892	2.1487	11.485	3.3655
	0.0893	-30.656	9.3422	2.9202			0.0893	2.5723	11.543	-6.1154
	0.0894	-29.864	9.5017	2.3476			0.0894	2.016	11.559	-12.289
	0.0895	-29.791	9.2988	-0.33434			0.0895	1.8922	11.786	-10.338
	0.0896	-30.418	9.1703	-2.1289			0.0896	1.9237	12.122	-1.4362
	0.0897	-30.043	9.1884	-0.22495			0.0897	2.0946	12.115	6.4407
	0.0898	-29.664	9.0662	-0.57486			0.0898	2.0282	12.076	6.8001
	0.0899	-29.451	9.1942	-4.1247			0.0899	1.5567	12.166	-1.2809
	0.09	-28.844	9.1821	-4.0779			0.09	0.99114	12.33	-6.6704
	0.0901	-28.712	8.7805	-1.1752			0.0901	0.98875	12.409	-4.9587
	0.0902	-29.087	8.5668	0.71939			0.0902	1.1204	12.42	-1.2059
	0.0903	-29.207	8.519	1.4246			0.0903	1.0287	12.548	1.3664
	0.0904	-28.566	8.2719	4.3981			0.0904	1.1111	12.544	1.5751
	0.0905	-27.902	8.1589	4.1668			0.0905	0.88423	12.818	2.8862
	0.0906	-28.04	8.1979	1.4762			0.0906	0.45253	13.013	5.1867
	0.0907	-28.461	7.9044	0.099685			0.0907	0.67654	12.824	5.266
	0.0908	-28.541	7.7081	-2.1449			0.0908	0.95642	12.989	2.8822
	0.0909	-28.291	7.7998	-2.0788			0.0909	0.90246	13.138	0.30082
	0.091	-28.223	7.7613	-2.195			0.091	0.76362	13.072	-3.4472
	0.0911	-28.223	7.6237	-0.80493			0.0911	0.96194	13.217	-4.9481
	0.0912	-28.567	7.5265	0.90452			0.0912	1.1185	13.372	-3.6234
	0.0913	-28.974	7.752	1.9228			0.0913	0.78644	13.408	-2.9819
	0.0914	-28.939	7.5952	1.2901			0.0914	1.5182	13.801	-3.5043
	0.0915	-28.821	7.5684	-0.12627			0.0915	2.249	13.898	-1.1555
	0.0916	-29.009	7.9559	1.221			0.0916	1.9132	13.684	3.6165
	0.0917	-29.518	8.0782	1.8936			0.0917	1.6607	13.684	2.6728
	0.0918	-29.697	7.8855	2.0467			0.0918	1.8682	13.746	-2.9682
	0.0919	-29.543	7.8404	2.2603			0.0919	2.4723	13.92	-5.6686
	0.092	-29.534	8.3099	-0.2563			0.092	3.1447	14.142	0.37572
	0.0921	-29.959	8.6494	-4.7086			0.0921	3.1941	14.188	7.5207
	0.0922	-30.193	8.8949	-6.9222			0.0922	3.313	14.174	6.6695
	0.0923	-30.352	9.0898	-5.1505			0.0923	3.751	14.248	3.6918
	0.0924	-30.954	9.1347	-0.91682			0.0924	3.8561	14.045	2.7731
	0.0925	-30.993	9.3757	4.5618			0.0925	4.3081	14.018	-0.63903
	0.0926	-30.803	9.6486	7.271			0.0926	4.7497	14.377	-4.8767
	0.0927	-31.368	9.8294	4.6505			0.0927	4.4226	14.48	-3.7606
	0.0928	-31.953	10.124	-1.8171			0.0928	4.3732	14.316	-1.9822
	0.0929	-32.084	10.315	-7.0322			0.0929	4.9073	14.4	-0.22604
	0.093	-31.954	10.299	-2.9083			0.093	5.0727	14.457	4.4123
	0.0931	-32.148	10.572	2.2398			0.0931	5.4272	14.486	6.4113
	0.0932	-32.587	10.808	-0.67154			0.0932	5.092	14.462	0.89305
	0.0933	-32.616	10.769	-0.76179			0.0933	4.5422	14.257	-2.463
	0.0934	-32.766	10.736	2.3244			0.0934	4.9285	14.307	0.60889
	0.0935	-32.955	10.957	3.9264			0.0935	4.7281	14.365	2.5498
	0.0936	-32.991	11.335	2.549			0.0936	4.6352	14.383	-3.7483
	0.0937	-33.037	11.211	2.0157			0.0937	4.8087	14.551	-6.6587
	0.0938	-32.894	10.948	1.7815			0.0938	4.7183	14.527	-3.419
	0.0939	-32.993	11.013	-4.0765			0.0939	4.5635	14.307	0.67387
	0.094	-33.092	11.304	-8.7007			0.094	4.2759	14.135	2.2418
	0.0941	-32.846	11.175	-5.0784			0.0941	4.2372	14.219	1.431
	0.0942	-32.867	10.897	1.6039			0.0942	4.1721	14.382	-1.7154
	0.0943	-32.857	10.884	5.45			0.0943	3.7279	14.386	-3.8452
	0.0944	-32.748	10.892	5.4989			0.0944	3.6866	14.286	-0.82151
	0.0945	-32.973	10.904	1.9357			0.0945	3.9248	14.433	1.5491
	0.0946	-33.069	10.85	-2.066			0.0946	3.5797	14.466	-0.87043
	0.0947	-32.973	10.656	-6.0394			0.0947	3.3613	14.299	-2.6879
	0.0948	-32.758	10.521	-8.3596			0.0948	3.5446	14.416	2.4044
	0.0949	-32.762	10.473	-4.0143			0.0949	3.4007	14.504	11.967
	0.095	-32.901	10.33	3.3498			0.095	3.1959	14.243	8.9384
	0.0951	-32.852	10.573	4.3111			0.0951	2.9174	14.312	-3.4538
	0.0952	-32.922	10.579	-0.22881			0.0952	2.8095	14.463	-11.659
	0.0953	-33.172	10.455	-2.6261			0.0953	2.9669	14.432	-12.607
	0.0954	-33.146	10.709	1.5521			0.0954	2.7905	14.36	-5.4004
	0.0955	-32.885	10.66	7.789			0.0955	2.7856	14.563	3.7792
	0.0956	-32.793	10.46	5.9378			0.0956	2.8436	14.738	5.8504
	0.0957	-32.725	10.194	-3.2145			0.0957	2.6561	14.597	4.1266
	0.0958	-32.839	10.279	-6.7268			0.0958	2.5414	14.643	2.3427
	0.0959	-33.037	10.498	-3.56			0.0959	2.3545	14.563	0.46869
	0.096	-33.151	10.476	-1.9785			0.096	2.3419	14.543	0.72949
	0.0961	-33.16	10.553	0.49187			0.0961	2.4487	14.762	5.3467
	0.0962	-33.143	10.428	7.4248			0.0962	2.3165	14.868	3.4317
	0.0963	-32.956	10.397	10.67			0.0963	2.0154	14.708	-2.7677
	0.0964	-32.853	10.458	5.214			0.0964	1.863	14.65	-4.1301
	0.0965	-33.212	10.379	-1.4821			0.0965	1.8889	14.76	-1.3601
	0.0966	-33.295	10.158	-3.7071			0.0966	1.6555	14.617	0.48234
	0.0967	-33.236	10.471	-2.8785			0.0967	1.0877	14.338	0.26684
	0.0968	-33.184	10.791	-4.0963			0.0968	0.54989	14.181	-1.1174
	0.0969	-33.193	10.455	-4.2707			0.0969	0.31807	14.215	-4.0468
	0.097	-33.441	10.277	-3.6267			0.097	0.084257	14.393	-6.8239
	0.0971	-33.423	10.093	-5.5742			0.0971	-0.40321	14.379	-3.9528
	0.0972	-32.982	10.115	-4.2853			0.0972	-0.89654	14.166	4.5271
	0.0973	-32.97	9.9563	2.1223			0.0973	-1.5938	14.019	9.2657
	0.0974	-33.117	9.8912	2.2765			0.0974	-2.0198	14.111	3.1477
	0.0975	-33.215	9.8642	0.79495			0.0975	-2.2393	14.051	-0.88136
	0.0976	-33.467	9.5438	5.0504			0.0976	-2.583	13.588	4.6326
	0.0977	-33.566	9.3426	9.2211			0.0977	-2.7393	13.47	11.052
	0.0978	-33.495	8.9808	4.2587			0.0978	-2.9427	13.714	6.4584
	0.0979	-33.128	8.8731	-2.5314			0.0979	-3.5847	13.623	-6.5889
	0.098	-33.075	8.8441	-1.8754			0.098	-4.0462	13.419	-9.7677
	0.0981	-33.324	8.3871	1.8669			0.0981	-4.0359	13.116	-4.0556
	0.0982	-33.515	8.1987	3.3296			0.0982	-4.29	12.979	-2.3659
	0.0983	-33.406	8.2319	-0.53624			0.0983	-4.7477	13.118	-4.0649
	0.0984	-33.417	7.9589	-6.5227			0.0984	-5.0081	12.996	-2.89
	0.0985	-33.899	7.4943	-3.1675			0.0985	-5.0131	12.976	0.23128
	0.0986	-33.88	7.2943	4.4825			0.0986	-4.9912	13.098	-0.86635
	0.0987	-33.89	7.2233	4.7444			0.0987	-5.0631	12.753	-0.55695
	0.0988	-34.215	7.0653	1.2548			0.0988	-5.2443	12.551	3.0154
	0.0989	-33.846	6.8939	-2.162			0.0989	-5.31	12.921	2.9391
	0.099	-33.87	6.7534	-3.9111			0.099	-5.2874	12.941	0.25865
	0.0991	-34.738	6.5124	-1.7281			0.0991	-4.8657	12.731	-2.0117
	0.0992	-34.913	6.4222	-1.7436			0.0992	-4.3788	12.726	-0.96774
	0.0993	-34.593	6.542	-3.3764			0.0993	-3.8893	12.768	1.5128
	0.0994	-34.573	6.5926	-0.93146			0.0994	-3.5574	12.781	-3.2462
	0.0995	-34.816	6.2047	0.75241			0.0995	-3.7285	12.818	-3.3694
	0.0996	-35.166	5.7431	0.82548			0.0996	-3.1485	12.697	3.8171
	0.0997	-34.884	5.5167	-0.10828			0.0997	-2.3874	12.598	9.0058
	0.0998	-34.633	5.574	-1.581			0.0998	-2.2943	12.696	7.6701
	0.0999	-35.163	5.9439	-1.3522			0.0999	-2.099	12.817	1.9113
	0.1	-35.207	5.7915	0.31723			0.1	-1.6965	12.847	-4.2884
	0.1001	-35.436	5.4158	-0.2535			0.1001	-1.3942	12.902	-7.3819
	0.1002	-35.539	5.3339	-0.087874			0.1002	-1.2811	12.937	-4.4294
	0.1003	-34.976	5.2597	1.2447			0.1003	-1.2209	13.024	-0.22121
	0.1004	-34.825	5.286	2.5891			0.1004	-0.89319	12.96	0.44216
	0.1005	-34.724	5.1529	2.7759			0.1005	-0.6257	12.786	-0.60411
	0.1006	-35.051	5.1135	4.371			0.1006	-0.53324	12.777	-0.86707
	0.1007	-35.405	5.5228	4.7649			0.1007	-0.08386	12.748	-2.0368
	0.1008	-35.069	5.4904	4.1226			0.1008	0.0039822	12.872	-0.38764
	0.1009	-34.646	5.2114	0.20108			0.1009	-0.44727	12.836	3.162
	0.101	-34.263	5.2106	-5.5173			0.101	-0.63342	12.502	3.0756
	0.1011	-34.078	5.2078	-7.475			0.1011	-0.1675	12.414	0.30151
	0.1012	-34.197	5.171	-4.3907			0.1012	0.26354	12.383	-0.24358
	0.1013	-34.138	5.0552	-0.62382			0.1013	-0.12285	12.28	1.5863
	0.1014	-34.107	5.0152	1.7255			0.1014	-0.73501	12.321	2.5095
	0.1015	-34.058	4.9619	-0.081172			0.1015	-0.80424	12.29	0.87642
	0.1016	-33.726	4.847	-3.6362			0.1016	-1.039	11.975	-1.803
	0.1017	-33.837	5.0062	-1.135			0.1017	-1.2277	11.737	-1.1558
	0.1018	-33.969	4.7574	3.4915			0.1018	-1.3088	11.956	-0.84434
	0.1019	-33.828	4.7815	4.9714			0.1019	-1.7041	12.174	-6.5021
	0.102	-33.914	5.1268	6.1034			0.102	-1.92	12.133	-7.391
	0.1021	-34.066	5.1073	7.0967			0.1021	-2.2142	11.717	-0.087207
	0.1022	-34.478	5.1451	0.76859			0.1022	-2.1556	11.459	3.6077
	0.1023	-34.689	5.1275	-7.9668			0.1023	-2.1272	11.497	2.6743
	0.1024	-34.816	4.9575	-8.5406			0.1024	-2.4088	11.746	5.3104
	0.1025	-35.373	5.2124	-5.0129			0.1025	-2.6235	11.761	7.5807
	0.1026	-35.854	5.5982	-4.9312			0.1026	-2.6195	11.548	5.8024
	0.1027	-36.049	5.5634	-4.3238			0.1027	-2.1751	11.596	-0.57975
	0.1028	-36.391	5.3703	-0.89149			0.1028	-1.9084	11.601	-8.4512
	0.1029	-37.072	5.3227	1.5425			0.1029	-2.3335	11.451	-11.177
	0.103	-37.669	5.3183	4.9197			0.103	-2.6534	11.53	-7.5831
	0.1031	-38.343	5.6071	9.415			0.1031	-2.4393	11.681	-1.4131
	0.1032	-39.11	5.909	8.0699			0.1032	-1.965	11.708	2.9055
	0.1033	-39.596	5.782	2.695			0.1033	-1.3778	11.698	5.6051
	0.1034	-40.326	5.9101	-1.0022			0.1034	-1.3305	11.629	6.8441
	0.1035	-40.907	5.8853	-1.7108			0.1035	-1.5125	11.855	6.1257
	0.1036	-41.255	6.0016	-0.059498			0.1036	-1.2025	12.078	1.7446
	0.1037	-42.047	6.2492	-0.21299			0.1037	-0.72069	12.012	-2.472
	0.1038	-42.592	6.2142	-3.5129			0.1038	-0.56562	11.987	-3.3011
	0.1039	-43.068	6.3347	-5.5878			0.1039	-0.40408	12.025	-3.6117
	0.104	-43.739	6.502	-0.77649			0.104	0.27638	12.019	-0.46325
	0.1041	-43.995	6.7486	2.3424			0.1041	0.9012	12.105	5.0196
	0.1042	-44.33	6.9563	0.33481			0.1042	1.0908	12.093	4.3157
	0.1043	-44.857	6.8697	-1.7007			0.1043	1.3324	12.044	-2.9138
	0.1044	-45.178	6.6804	-0.87963			0.1044	1.525	12.08	-3.8922
	0.1045	-45.475	6.6312	0.32289			0.1045	1.6524	12.037	2.4382
	0.1046	-45.513	6.9593	-0.064559			0.1046	1.7382	11.915	3.9546
	0.1047	-45.563	7.2198	2.578			0.1047	1.8238	12.013	0.91374
	0.1048	-45.856	7.2437	5.6385			0.1048	2.1272	11.976	0.84595
	0.1049	-45.812	6.9836	4.6468			0.1049	2.3429	11.772	3.7184
	0.105	-45.79	6.7686	1.0156			0.105	2.3295	11.716	4.1674
	0.1051	-45.928	6.9852	-0.75103			0.1051	2.5244	11.627	1.598
	0.1052	-46.155	6.7927	-2.9597			0.1052	2.0825	11.461	0.74787
	0.1053	-46.091	6.6241	-3.6123			0.1053	1.9302	11.505	1.0741
	0.1054	-45.664	6.8927	-4.6864			0.1054	2.3811	11.541	-3.5714
	0.1055	-45.776	6.8115	-5.1096			0.1055	2.3589	11.176	-9.5188
	0.1056	-45.878	6.3366	1.2638			0.1056	2.5135	11.164	-7.2017
	0.1057	-45.394	6.2305	7.5985			0.1057	1.9848	11.321	-4.5501
	0.1058	-45.221	6.5244	4.3798			0.1058	1.5752	11.029	-4.8506
	0.1059	-45.078	6.3555	-3.3245			0.1059	1.7985	10.682	-3.1597
	0.106	-45.02	5.8059	-6.1423			0.106	1.3471	10.529	0.88014
	0.1061	-45.355	5.6774	-2.6682			0.1061	1.1193	10.519	7.4668
	0.1062	-45.193	5.8351	-0.77772			0.1062	1.4019	10.585	10.144
	0.1063	-44.801	5.9077	-0.01523			0.1063	1.2492	10.522	3.9669
	0.1064	-44.818	5.8106	3.5992			0.1064	1.0768	10.319	-0.57309
	0.1065	-45.306	5.6288	1.8863			0.1065	0.71292	10.231	-1.8866
	0.1066	-45.231	5.8159	-1.0629			0.1066	0.46661	10.234	-3.3447
	0.1067	-45.123	5.7849	3.5767			0.1067	0.88932	10.201	-1.7924
	0.1068	-45.526	5.5803	6.2559			0.1068	0.91882	10.047	-1.6232
	0.1069	-45.81	5.6944	3.9043			0.1069	0.36778	9.7093	-3.0608
	0.107	-45.723	5.6362	2.9149			0.107	0.48029	9.7332	-2.9515
	0.1071	-45.745	5.8264	4.5238			0.1071	0.89724	9.9467	2.0983
	0.1072	-46.058	6.2028	6.238			0.1072	0.47952	9.8863	5.2564
	0.1073	-46.195	6.4168	3.9069			0.1073	0.76376	9.8639	5.1202
	0.1074	-46.328	6.5658	3.0664			0.1074	1.1291	9.7127	4.4798
	0.1075	-46.45	6.5566	6.4749			0.1075	0.62372	9.4324	1.7161
	0.1076	-46.59	6.756	10.213			0.1076	0.62169	9.2201	-0.57799
	0.1077	-46.849	6.9669	2.2468			0.1077	0.79788	9.2721	-2.8204
	0.1078	-47.269	7.1218	-28.996			0.1078	0.75555	9.6818	-5.6367
	0.1079	-47.252	7.4452	-69.083			0.1079	0.90538	9.5174	-5.5307
	0.108	-47.294	7.9565	-76.663			0.108	0.9752	9.0792	-2.0878
	0.1081	-47.643	8.4531	-24.881			0.1081	0.95417	8.8289	0.53528
	0.1082	-47.966	8.6304	31.848			0.1082	0.97772	8.8031	-2.3999
	0.1083	-48.369	8.6484	52.842			0.1083	0.8634	8.9684	-2.889
	0.1084	-48.645	8.8003	48.682			0.1084	0.89772	8.9975	0.35384
	0.1085	-48.715	9.189	33.102			0.1085	0.85847	8.6984	3.8817
	0.1086	-48.782	9.4866	16.111			0.1086	0.80255	8.3375	2.2424
	0.1087	-48.994	9.7056	1.5591			0.1087	0.68366	8.4773	-3.9363
	0.1088	-49.494	9.9907	-6.531			0.1088	0.62885	8.467	-2.8521
	0.1089	-49.809	10.325	-8.5617			0.1089	0.6572	8.0618	2.3061
	0.109	-49.736	10.343	-10.77			0.109	0.42547	7.8508	5.5366
	0.1091	-50.018	10.295	-9.1047			0.1091	0.16138	7.8925	9.1777
	0.1092	-50.158	10.642	-2.792			0.1092	0.4241	7.6875	10.013
	0.1093	-50.398	10.829	0.44144			0.1093	0.41055	7.5032	3.6454
	0.1094	-50.79	10.742	0.076571			0.1094	0.12764	7.7195	-5.8134
	0.1095	-51.169	10.701	-0.16644			0.1095	-0.053836	7.7092	-7.517
	0.1096	-51.786	10.915	0.42136			0.1096	-0.11372	7.3854	-1.8606
	0.1097	-51.785	11.092	2.4852			0.1097	0.02105	7.2371	4.2765
	0.1098	-52.03	10.888	1.4402			0.1098	-0.18289	7.2061	4.0381
	0.1099	-52.445	10.757	-2.7457			0.1099	-0.33932	7.5042	-2.7116
	0.11	-52.768	10.582	-3.5066			0.11	-0.18291	7.5357	-9.4646
	0.1101	-53.142	10.345	-1.1562			0.1101	-0.3051	7.2501	-7.6716
	0.1102	-53.478	10.377	-0.61372			0.1102	-0.41358	7.3106	-1.7487
	0.1103	-54.013	10.435	0.58073			0.1103	-0.37318	7.3232	0.037944
	0.1104	-54.371	10.348	3.5804			0.1104	-0.55207	7.3882	-1.0194
	0.1105	-54.659	10.036	3.8776			0.1105	-0.41175	7.4541	1.5074
	0.1106	-54.813	9.5645	1.9349			0.1106	-0.012752	7.4398	4.8942
	0.1107	-55.22	9.3908	2.0532			0.1107	-0.063508	7.379	4.2852
	0.1108	-55.879	9.2477	1.6495			0.1108	-0.55216	7.4426	0.95614
	0.1109	-56.041	9.0739	-1.6496			0.1109	-0.58568	7.815	0.35642
	0.111	-55.683	9.0983	-5.1087			0.111	-0.23926	7.8723	5.5513
	0.1111	-55.747	8.8356	-4.7343			0.1111	-0.3306	7.7724	8.956
	0.1112	-56.323	8.4313	-0.1655			0.1112	-0.24379	7.9952	5.0618
	0.1113	-56.598	8.3236	2.5117			0.1113	0.081364	8.0665	-4.4629
	0.1114	-56.727	8.2628	-1.5537			0.1114	-0.29046	8.2222	-14.819
	0.1115	-56.86	8.0548	-7.4065			0.1115	-0.2446	8.4844	-15.758
	0.1116	-56.668	7.9293	-5.0672			0.1116	0.1671	8.4104	-8.5145
	0.1117	-56.549	7.8272	3.8362			0.1117	0.11843	8.5212	-0.98322
	0.1118	-56.697	7.6801	7.89			0.1118	0.17133	8.5623	3.2532
	0.1119	-56.822	7.817	6.5905			0.1119	0.43046	8.3517	6.0718
	0.112	-56.678	8.0674	1.9919			0.112	0.34449	8.383	9.2124
	0.1121	-56.475	7.8563	-2.1196			0.1121	0.19752	8.2667	11.571
	0.1122	-56.616	7.673	-1.0169			0.1122	0.58577	8.1127	4.7332
	0.1123	-56.573	7.8875	2.4278			0.1123	1.0177	8.4374	-7.0201
	0.1124	-56.167	8.0001	3.0114			0.1124	1.1188	8.4005	-8.9364
	0.1125	-56.085	7.9827	0.3467			0.1125	0.82376	8.0671	-3.4101
	0.1126	-56.135	7.9227	-2.8563			0.1126	0.85623	7.9831	0.40781
	0.1127	-56.001	8.0435	-2.5579			0.1127	0.86518	7.9287	1.6494
	0.1128	-55.78	8.2176	-2.8552			0.1128	0.89698	7.8093	0.53605
	0.1129	-55.605	8.1838	-5.9745			0.1129	1.2455	7.7768	0.78951
	0.113	-55.591	8.1842	-3.0323			0.113	1.4161	7.9347	2.7195
	0.1131	-55.652	8.2534	0.93516			0.1131	1.4595	7.9178	1.4236
	0.1132	-55.661	8.2675	-2.5152			0.1132	1.2049	7.697	2.6128
	0.1133	-55.608	8.319	-4.4885			0.1133	1.5702	7.5221	5.188
	0.1134	-55.684	8.272	1.4131			0.1134	1.9594	7.5735	4.0759
	0.1135	-55.798	8.2319	8.0333			0.1135	2.159	7.6061	-1.7616
	0.1136	-55.865	8.2265	7.9338			0.1136	1.9687	7.5482	-5.7348
	0.1137	-55.994	8.0676	3.0479			0.1137	1.5321	7.7254	-5.2997
	0.1138	-56.202	7.9648	-2.1006			0.1138	1.7846	7.8688	-5.2977
	0.1139	-56.525	8.0544	-4.4171			0.1139	2.0578	7.8655	-4.0504
	0.114	-57.088	7.8266	-2.2455			0.114	2.288	8.1916	0.52359
	0.1141	-57.208	7.4908	2.3136			0.1141	2.8881	8.4835	1.958
	0.1142	-57.273	7.5296	4.0834			0.1142	2.8896	8.4745	2.2472
	0.1143	-57.972	7.4838	1.3899			0.1143	2.2384	8.9275	6.1521
	0.1144	-58.52	7.3949	-2.1962			0.1144	2.378	9.5028	8.2774
	0.1145	-58.697	7.3588	-2.003			0.1145	2.6436	10.028	4.1339
	0.1146	-58.769	7.2006	2.4134			0.1146	2.6629	10.619	-0.53986
	0.1147	-59.552	6.9095	-0.17277			0.1147	3.0613	11.147	-1.1545
	0.1148	-59.916	6.9564	-4.5284			0.1148	3.3285	11.699	0.047408
	0.1149	-60.211	7.1113	-1.4789			0.1149	3.1844	12.286	-0.45435
	0.115	-60.626	6.9272	1.8778			0.115	3.0558	13.169	-2.879
	0.1151	-60.886	6.8266	-0.5547			0.1151	3.1498	14.058	-2.8825
	0.1152	-61.479	7.0362	-1.0305			0.1152	3.557	14.869	-4.7113
	0.1153	-61.789	6.9236	1.6996			0.1153	3.4616	15.877	-6.9511
	0.1154	-62.542	6.9627	3.1576			0.1154	3.175	16.989	-6.4482
	0.1155	-63.084	7.063	3.5934			0.1155	3.1335	17.89	-4.4274
	0.1156	-63.378	7.0918	2.5612			0.1156	3.0186	18.467	-2.4966
	0.1157	-63.801	7.3675	-3.2606			0.1157	2.8708	19.484	-0.07373
	0.1158	-64.246	7.4546	-6.2355			0.1158	2.9032	20.595	2.963
	0.1159	-64.781	7.4797	-3.9479			0.1159	2.9368	21.54	6.8472
	0.116	-65.406	7.5341	2.3908			0.116	2.5243	22.473	7.3855
	0.1161	-66.004	7.7917	5.7859			0.1161	2.0209	23.281	5.5963
	0.1162	-66.56	8.084	4.1733			0.1162	1.5553	24.317	2.8038
	0.1163	-66.98	8.2022	5.2821			0.1163	1.6057	25.338	2.7241
	0.1164	-67.25	8.5214	6.1532			0.1164	1.7996	26.121	2.4971
	0.1165	-67.521	8.7375	5.1026			0.1165	1.5992	26.762	-1.7221
	0.1166	-68.098	8.7869	8.4132			0.1166	1.2568	27.486	-3.6301
	0.1167	-68.739	9.1095	12.835			0.1167	0.95933	28.212	-2.7257
	0.1168	-69.099	9.1713	10.604			0.1168	0.51272	29.116	-1.8967
	0.1169	-69.623	9.2174	5.9871			0.1169	0.40955	29.688	-0.65778
	0.117	-70.057	9.3487	-8.0639			0.117	0.35141	29.841	-0.95241
	0.1171	-70.508	9.575	-42.38			0.1171	-0.11895	30.166	-2.5348
	0.1172	-71.286	9.8375	-74.45			0.1172	-0.20021	30.713	-4.8004
	0.1173	-71.595	9.7141	-75.741			0.1173	-0.41019	31.221	-4.2927
	0.1174	-71.479	9.6797	-26.915			0.1174	-0.87131	31.501	3.806
	0.1175	-71.884	9.7008	33.893			0.1175	-1.2451	31.357	10.75
	0.1176	-72.559	9.5158	67.192			0.1176	-1.1548	31.035	7.2246
	0.1177	-72.92	9.3014	60.576			0.1177	-1.2225	31.156	2.1236
	0.1178	-73.367	9.2004	33.152			0.1178	-1.4925	31.326	-0.2408
	0.1179	-73.793	9.1797	9.6031			0.1179	-1.6205	31.09	-2.8393
	0.118	-73.872	9.1517	-2.5734			0.118	-2.1194	30.862	-1.888
	0.1181	-73.819	8.774	-5.2195			0.1181	-2.4139	30.944	-0.69907
	0.1182	-74.117	8.4507	-5.3004			0.1182	-2.2069	30.687	-6.9831
	0.1183	-74.804	8.4683	-8.2324			0.1183	-2.1228	30.321	-10.505
	0.1184	-74.846	8.3625	-8.5705			0.1184	-2.4391	30.178	-4.0475
	0.1185	-74.75	8.0845	-2.0547			0.1185	-2.8555	29.902	3.6966
	0.1186	-74.997	7.6077	4.266			0.1186	-3.0925	29.727	6.0474
	0.1187	-75.263	7.3679	-0.010218			0.1187	-3.0991	29.421	1.6142
	0.1188	-75.651	7.2811	-8.7446			0.1188	-3.4555	28.952	-2.2607
	0.1189	-75.919	6.9996	-10.46			0.1189	-3.7349	28.827	-3.4561
	0.119	-75.784	6.7451	-3.8539			0.119	-3.6848	28.877	-1.67
	0.1191	-75.86	6.669	2.6524			0.1191	-3.8287	28.674	2.4223
	0.1192	-76.368	6.6447	2.9			0.1192	-4.3539	28.146	2.7576
	0.1193	-76.681	6.5317	0.10122			0.1193	-4.5582	27.83	0.16757
	0.1194	-77.046	6.1451	-2.316			0.1194	-4.4345	27.877	-0.10394
	0.1195	-77.13	5.795	-1.4836			0.1195	-4.3315	27.832	1.8843
	0.1196	-77.367	6.0371	2.0176			0.1196	-4.3397	27.563	2.0843
	0.1197	-77.838	6.2174	2.8995			0.1197	-4.6478	27.374	-1.3372
	0.1198	-78.263	6.0321	3.5115			0.1198	-4.9325	27.134	0.83742
	0.1199	-78.811	5.9042	7.0707			0.1199	-5.3469	27.009	8.2154
	0.12	-79.258	6.0477	4.8398			0.12	-5.4637	27.108	8.5046
	0.1201	-79.915	6.1949	-1.2268			0.1201	-5.6045	27.272	3.1426
	0.1202	-80.615	6.2793	-1.7108			0.1202	-5.9196	27.301	-0.71901
	0.1203	-81.469	6.3232	-2.8659			0.1203	-6.0574	26.944	-4.7242
	0.1204	-82.01	6.3692	-5.6928			0.1204	-6.1311	26.949	-6.921
	0.1205	-82.298	6.4499	-5.9412			0.1205	-6.1661	27.15	-3.6253
	0.1206	-83.238	6.5129	-2.5799			0.1206	-6.1941	27.096	-0.90654
	0.1207	-84.59	6.7294	1.9576			0.1207	-6.4713	27.003	-5.0744
	0.1208	-85.635	6.7879	1.7672			0.1208	-6.7226	27.108	-6.3848
	0.1209	-86.611	7.0378	-0.037592			0.1209	-6.7081	27.304	-2.0532
	0.121	-87.698	7.2419	-0.066943			0.121	-6.6792	27.351	4.8321
	0.1211	-88.616	6.9161	3.0078			0.1211	-6.4546	27.126	8.7271
	0.1212	-89.279	6.9363	6.5109			0.1212	-6.4768	27.106	6.7089
	0.1213	-90.405	6.9082	7.3805			0.1213	-6.3561	27.284	1.1227
	0.1214	-91.856	6.8658	3.0918			0.1214	-6.1548	27.266	-4.1438
	0.1215	-92.846	7.1957	-3.1112			0.1215	-6.5498	27.34	-3.4324
	0.1216	-93.887	7.2244	-4.332			0.1216	-6.7288	27.321	3.7046
	0.1217	-94.921	6.849	0.17933			0.1217	-6.5687	27.275	8.459
	0.1218	-95.536	6.6848	6.2427			0.1218	-6.1405	27.468	3.0233
	0.1219	-96.188	6.6572	4.1245			0.1219	-5.9733	27.527	-4.8185
	0.122	-97.321	6.5482	-4.8833			0.122	-5.9425	27.581	-6.036
	0.1221	-98.339	6.5949	-5.658			0.1221	-5.6862	27.755	-3.2888
	0.1222	-98.906	6.48	0.55648			0.1222	-5.3379	27.991	0.95269
	0.1223	-99.232	6.3057	0.69667			0.1223	-4.9069	28.253	1.6501
	0.1224	-100.09	6.2068	-0.20994			0.1224	-4.9349	28.25	-4.0729
	0.1225	-100.79	5.8672	0.20569			0.1225	-5.0264	28.372	-6.2417
	0.1226	-100.78	5.7783	-1.5764			0.1226	-4.6416	28.594	-0.085374
	0.1227	-101.26	5.9056	-4.4238			0.1227	-4.0913	28.928	1.7141
	0.1228	-101.71	5.6893	-2.3217			0.1228	-4.0866	29.226	-2.8097
	0.1229	-102.61	5.5662	0.40585			0.1229	-4.5153	29.6	-1.6591
	0.123	-103.24	5.47	-0.79165			0.123	-4.4904	29.816	2.0585
	0.1231	-103.12	5.4582	2.9712			0.1231	-4.1186	29.643	2.6766
	0.1232	-103.25	5.3398	10.563			0.1232	-4.0607	29.928	2.1771
	0.1233	-103.5	5.3543	18.634			0.1233	-4.2314	30.485	2.8745
	0.1234	-104.27	5.2779	26.687			0.1234	-4.4336	30.786	3.1758
	0.1235	-104.78	5.1827	21.756			0.1235	-4.5376	31.051	2.6524
	0.1236	-105.15	5.3946	-10.18			0.1236	-4.4954	31.151	-2.621
	0.1237	-105.29	5.4721	-61.867			0.1237	-4.6681	31.586	-8.0432
	0.1238	-105.61	5.5759	-86.703			0.1238	-4.8644	32.051	-3.9159
	0.1239	-106.32	5.4533	-51.766			0.1239	-4.7862	31.915	1.4698
	0.124	-106.6	5.3762	4.9279			0.124	-4.7593	32.152	2.2325
	0.1241	-107.08	5.6671	39.233			0.1241	-5.0514	32.65	1.3033
	0.1242	-107.86	5.9736	50.483			0.1242	-5.4576	32.784	-1.9515
	0.1243	-108.09	5.9128	46.244			0.1243	-5.7262	32.818	-2.4649
	0.1244	-108.27	5.7925	27.272			0.1244	-6.1645	32.863	2.5199
	0.1245	-109.13	6.0036	5.9398			0.1245	-6.3027	33.248	3.9671
	0.1246	-109.75	6.0837	-5.5663			0.1246	-6.3148	33.368	1.7652
	0.1247	-109.78	6.2126	-9.4448			0.1247	-6.5584	33.375	-0.23629
	0.1248	-110.43	6.53	-7.7427			0.1248	-6.7178	33.47	0.20153
	0.1249	-111.44	6.3923	-4.3626			0.1249	-6.7386	32.938	2.5619
	0.125	-112	6.2454	-4.6099			0.125	-6.7888	32.856	3.0284
	0.1251	-112.42	6.2523	-8.4062			0.1251	-7.2219	33.184	0.074479
	0.1252	-113.09	6.1876	-7.7845			0.1252	-7.3541	33.388	-1.3069
	0.1253	-114	6.3456	-0.32377			0.1253	-7.1513	33.4	0.29516
	0.1254	-114.39	6.3078	3.495			0.1254	-6.836	33.003	-0.47518
	0.1255	-114.73	6.2103	2.0929			0.1255	-6.5757	32.738	-4.6554
	0.1256	-115.55	6.0423	0.97384			0.1256	-6.7064	32.883	-5.9126
	0.1257	-116.39	5.9133	-2.512			0.1257	-7.0437	32.643	-1.0227
	0.1258	-117.01	6.0162	-8.4386			0.1258	-6.9803	32.436	5.3128
	0.1259	-117.54	5.9976	-7.3699			0.1259	-6.5061	32.443	7.34
	0.126	-117.87	5.6711	0.34935			0.126	-6.0441	32.307	3.6528
	0.1261	-118.05	5.4086	4.3541			0.1261	-5.8081	32.352	-2.9445
	0.1262	-118.46	5.4812	5.1353			0.1262	-5.7715	32.414	-8.127
	0.1263	-118.85	5.3409	5.7376			0.1263	-5.5406	32.474	-4.7779
	0.1264	-119.25	5.2958	3.5773			0.1264	-5.2701	32.241	1.8791
	0.1265	-119.71	5.1503	1.164			0.1265	-5.0362	31.899	1.9003
	0.1266	-120.05	4.853	0.094248			0.1266	-4.751	32.086	-1.3291
	0.1267	-120.05	4.8093	-3.2143			0.1267	-4.2669	32.424	-0.66995
	0.1268	-119.97	4.7144	-6.2154			0.1268	-3.8167	32.407	2.0981
	0.1269	-120.41	4.5	-0.45047			0.1269	-3.3967	32.371	3.2006
	0.127	-120.76	4.2493	6.1257			0.127	-2.875	32.373	1.6923
	0.1271	-120.55	4.134	7.1604			0.1271	-2.6015	32.275	1.9591
	0.1272	-120.83	3.8082	3.6418			0.1272	-2.5933	32.285	4.3906
	0.1273	-121.13	3.4623	-1.6789			0.1273	-2.3743	32.596	2.0038
	0.1274	-121.05	3.6971	-3.7399			0.1274	-1.8318	32.655	-3.4956
	0.1275	-121.29	3.8234	1.6468			0.1275	-1.5383	32.687	-5.6993
	0.1276	-121.18	3.5329	3.602			0.1276	-1.7819	32.673	-5.9301
	0.1277	-121.02	3.2392	-4.6022			0.1277	-1.5631	32.451	-3.4089
	0.1278	-121.4	3.1218	-9.0831			0.1278	-1.0197	32.625	3.4552
	0.1279	-121.46	3.215	-3.7945			0.1279	-1.0576	32.688	9.6807
	0.128	-121.29	3.2256	2.2887			0.128	-0.99086	32.525	6.5859
	0.1281	-121.44	3.2301	6.3363			0.1281	-0.94067	32.475	-3.7944
	0.1282	-121.6	3.1014	4.5826			0.1282	-1.1974	32.609	-8.1195
	0.1283	-121.82	2.9199	-0.19921			0.1283	-1.0041	32.803	-5.6778
	0.1284	-121.93	3.1808	-0.67971			0.1284	-0.72766	32.827	-0.36887
	0.1285	-122.05	3.33	1.4819			0.1285	-0.86492	32.446	0.54361
	0.1286	-122.1	3.1127	-0.023499			0.1286	-1.031	32.044	-2.4495
	0.1287	-122.47	3.0533	-4.1173			0.1287	-0.80295	32.271	0.79506
	0.1288	-123.33	3.1301	-5.9299			0.1288	-0.50239	32.486	5.7982
	0.1289	-123.64	3.1726	-4.4986			0.1289	-0.68618	32.364	6.5935
	0.129	-123.37	3.1259	0.17785			0.129	-0.90402	32.263	1.0295
	0.1291	-123.53	2.9972	1.099			0.1291	-1.0104	32.116	-4.0528
	0.1292	-124.35	3.2169	-0.98996			0.1292	-1.052	31.942	-5.6838
	0.1293	-124.86	3.4466	1.6731			0.1293	-0.77877	31.825	-2.0432
	0.1294	-125.11	3.5043	4.4177			0.1294	-0.8608	31.817	4.6841
	0.1295	-125.79	3.5358	8.2343			0.1295	-0.9515	31.656	6.4142
	0.1296	-125.99	3.4329	11.966			0.1296	-0.81342	31.426	2.0826
	0.1297	-126.09	3.5705	13.348			0.1297	-0.89233	31.429	-3.9761
	0.1298	-126.54	3.6964	12.551			0.1298	-0.92406	31.558	-7.4168
	0.1299	-126.9	3.8153	9.9698			0.1299	-0.53385	31.509	-7.3817
	0.13	-127.37	3.8703	-4.2913			0.13	-0.28203	31.441	-3.7595
	0.1301	-128.07	3.9334	-38.168			0.1301	-0.52631	31.499	0.38835
	0.1302	-128.86	4.0229	-67.079			0.1302	-0.32292	31.435	0.37123
	0.1303	-129.31	3.7539	-60.602			0.1303	-0.041143	31.424	-0.19619
	0.1304	-129.66	4.0084	-13.515			0.1304	-0.085207	31.63	3.9354
	0.1305	-130.04	4.4669	31.563			0.1305	-0.28332	31.834	8.4343
	0.1306	-130.5	4.2596	49.191			0.1306	-0.14206	31.709	4.6705
	0.1307	-131.16	4.238	45.848			0.1307	0.54607	31.536	-1.7663
	0.1308	-132.22	4.3707	29.094			0.1308	0.57133	31.632	-4.7942
	0.1309	-132.67	4.3744	12.542			0.1309	0.32344	31.822	-1.7464
	0.131	-132.68	4.8492	3.1318			0.131	0.2627	31.983	1.9712
	0.1311	-133.67	5.0488	-4.2768			0.1311	0.099493	32.166	-0.23911
	0.1312	-134.65	4.8811	-10.717			0.1312	0.048609	32.429	-1.6634
	0.1313	-134.63	4.8326	-11.856			0.1313	0.024407	32.363	1.8066
	0.1314	-134.73	4.8851	-7.8089			0.1314	0.0031092	32.321	2.0419
	0.1315	-135.63	5.2715	-3.5085			0.1315	0.10501	32.581	4.6742
	0.1316	-136.21	5.3099	-0.24303			0.1316	0.0026381	32.832	8.1889
	0.1317	-136.42	5.2061	1.3903			0.1317	-0.53114	33.056	5.2456
	0.1318	-136.77	5.2278	2.2661			0.1318	-1.0497	33.466	-2.1668
	0.1319	-137.37	5.0748	0.40878			0.1319	-1.101	33.652	-8.0503
	0.132	-137.97	5.4203	-1.1669			0.132	-1.1532	33.57	-9.2274
	0.1321	-138.17	5.6652	0.79472			0.1321	-1.7255	33.642	-4.7475
	0.1322	-138.6	5.647	1.4545			0.1322	-2.2619	33.817	2.4909
	0.1323	-138.86	5.5953	-0.52534			0.1323	-2.4094	33.983	6.9079
	0.1324	-138.84	5.4931	-0.50223			0.1324	-2.7118	34.114	3.0824
	0.1325	-139.48	5.7039	-2.421			0.1325	-3.2451	34.556	0.15645
	0.1326	-139.92	5.9574	-7.0157			0.1326	-3.6002	34.663	-0.44907
	0.1327	-139.94	6.2804	-6.8878			0.1327	-4.1501	34.439	-3.2455
	0.1328	-140.17	6.3354	-1.9861			0.1328	-4.7995	34.511	-3.885
	0.1329	-140.36	6.1851	0.58701			0.1329	-5.2208	34.871	-2.545
	0.133	-140.68	6.1775	0.20986			0.133	-5.417	35.433	-1.1669
	0.1331	-140.87	6.5792	-0.059433			0.1331	-5.2049	35.467	0.66378
	0.1332	-140.67	7.1948	3.6294			0.1332	-5.5659	35.22	1.5641
	0.1333	-141.03	7.2515	7.5168			0.1333	-6.3781	35.306	5.3684
	0.1334	-141.26	7.1246	3.8857			0.1334	-6.7134	35.631	5.9193
	0.1335	-140.92	7.6382	-0.76494			0.1335	-6.7991	36.032	-0.79253
	0.1336	-141.14	7.9373	-1.4994			0.1336	-6.8759	36.33	-4.9959
	0.1337	-141.56	7.8308	1.2241			0.1337	-6.9355	36.299	-2.1648
	0.1338	-141.62	8.2528	1.1788			0.1338	-6.8076	36.215	1.3186
	0.1339	-141.6	8.4972	-2.0602			0.1339	-7.1033	36.596	0.13335
	0.134	-141.4	8.5776	-2.6082			0.134	-7.2162	37.031	-1.8098
	0.1341	-141.48	9.226	-2.1885			0.1341	-7.1406	37.251	-1.8615
	0.1342	-141.64	9.5537	-5.2194			0.1342	-7.2796	37.307	-1.5469
	0.1343	-141.83	9.5069	-5.2348			0.1343	-7.192	37.471	0.27146
	0.1344	-142.03	9.5965	-0.34512			0.1344	-6.9591	37.715	2.9607
	0.1345	-141.96	9.836	2.1847			0.1345	-6.9147	37.945	3.7744
	0.1346	-142.22	10.261	4.3093			0.1346	-6.5403	38.238	-0.91643
	0.1347	-142.67	10.518	5.5041			0.1347	-6.2641	38.294	-5.4234
	0.1348	-142.73	10.649	-0.39589			0.1348	-6.3798	38.362	-3.9394
	0.1349	-143.07	10.818	-5.9869			0.1349	-6.1704	38.338	0.34121
	0.135	-143.33	11.059	-4.6443			0.135	-5.7529	38.371	1.3507
	0.1351	-143.41	11.1	-0.85051			0.1351	-5.4612	38.611	0.035966
	0.1352	-143.87	10.909	1.4353			0.1352	-5.4993	38.793	-0.7454
	0.1353	-144.31	11.046	7.3844			0.1353	-5.4334	38.729	2.9521
	0.1354	-144.68	11.209	11.509			0.1354	-5.1698	38.762	5.8
	0.1355	-145.11	11.12	10.033			0.1355	-4.7725	38.925	4.5564
	0.1356	-145.71	11.049	9.7879			0.1356	-4.6012	38.732	-0.56302
	0.1357	-146.03	11.114	12.549			0.1357	-4.5436	38.787	-6.7523
	0.1358	-146.49	10.962	16.357			0.1358	-4.3212	38.829	-6.1763
	0.1359	-147.27	10.662	14.407			0.1359	-4.2896	38.728	0.16755
	0.136	-148.21	10.577	-12.79			0.136	-4.0595	38.834	1.2118
	0.1361	-148.91	10.623	-60.216			0.1361	-3.7563	38.934	-4.5222
	0.1362	-149.42	10.501	-78.756			0.1362	-4.016	38.803	-4.8378
	0.1363	-150.3	10.292	-48.252			0.1363	-4.0487	38.593	0.92818
	0.1364	-151.29	10.39	5.9249			0.1364	-3.6484	38.314	6.7665
	0.1365	-152.02	10.117	46.767			0.1365	-3.4871	38.041	7.3292
	0.1366	-152.78	9.9053	54.879			0.1366	-3.4506	38.323	4.3872
	0.1367	-153.84	9.664	40.949			0.1367	-3.4187	38.453	5.02
	0.1368	-154.97	9.4077	19.616			0.1368	-3.534	38.224	2.9449
	0.1369	-155.55	9.4655	2.648			0.1369	-3.358	37.917	-2.2944
	0.137	-156.16	9.3538	-4.6478			0.137	-3.0451	37.64	-1.9776
	0.1371	-157.01	9.111	-10.643			0.1371	-3.0635	37.906	0.57519
	0.1372	-157.9	9.0027	-14.978			0.1372	-3.1094	38.082	-2.3593
	0.1373	-158.92	8.9079	-11.095			0.1373	-3.085	37.985	-5.6875
	0.1374	-159.61	8.7111	-2.7982			0.1374	-2.86	38.045	-5.3247
	0.1375	-160.16	8.6604	-1.0359			0.1375	-2.5922	37.823	-4.6666
	0.1376	-160.65	8.7303	-1.4125			0.1376	-2.4782	37.644	-1.8474
	0.1377	-161.36	8.6564	-2.2981			0.1377	-2.5979	37.528	3.2621
	0.1378	-162.11	8.5659	-3.894			0.1378	-2.5664	37.687	7.3072
	0.1379	-162.57	8.6781	-2.6924			0.1379	-2.3149	37.962	3.9965
	0.138	-163.27	8.7111	2.4039			0.138	-2.3842	37.695	-3.585
	0.1381	-163.67	8.7876	6.4345			0.1381	-2.5308	37.711	-3.8165
	0.1382	-163.89	8.7009	6.613			0.1382	-1.9939	37.469	0.091641
	0.1383	-164.29	8.8358	2.3175			0.1383	-1.8166	37.489	2.2286
	0.1384	-164.32	9.0192	-0.32789			0.1384	-2.2337	37.8	4.3769
	0.1385	-164.43	8.9654	1.2455			0.1385	-2.2104	37.751	3.4411
	0.1386	-164.81	9.0278	3.4232			0.1386	-1.9358	37.922	-2.2815
	0.1387	-165.24	9.0968	2.236			0.1387	-1.2696	38.097	-4.6373
	0.1388	-165.13	9.3399	-2.7341			0.1388	-1.1923	38.221	2.6421
	0.1389	-164.48	9.3133	-5.5525			0.1389	-1.5704	38.379	9.7893
	0.139	-164.25	9.3148	-3.1517			0.139	-1.7308	38.484	5.9204
	0.1391	-164.38	9.5567	-2.112			0.1391	-2.1748	38.579	-2.4808
	0.1392	-164.54	9.3698	-4.2797			0.1392	-1.9184	38.752	-8.4367
	0.1393	-164.08	9.2415	-3.7774			0.1393	-1.4572	39.056	-9.745
	0.1394	-163.44	9.2436	3.0237			0.1394	-1.8535	39.171	-6.1962
	0.1395	-163.44	9.0221	9.5966			0.1395	-2.2372	39.077	-0.02383
	0.1396	-163.82	9.2389	6.4574			0.1396	-2.4493	39.423	3.4923
	0.1397	-163.7	9.5503	-0.072991			0.1397	-2.3376	39.688	2.1051
	0.1398	-163.05	9.3222	-4.8286			0.1398	-2.4182	39.882	2.9388
	0.1399	-162.68	8.8445	-5.5138			0.1399	-2.8917	39.967	4.9175
	0.14	-162.4	8.7744	-0.402			0.14	-3.1604	40.081	3.5547
	0.1401	-162.73	8.9933	4.1447			0.1401	-3.3202	40.329	0.020827
	0.1402	-163.2	8.7612	0.68304			0.1402	-3.5057	40.624	-3.3808
	0.1403	-163.19	8.9599	-3.484			0.1403	-3.523	41.007	-4.8449
	0.1404	-162.69	9.1875	-2.118			0.1404	-3.4768	41.283	-3.283
	0.1405	-162.36	8.9419	0.93517			0.1405	-3.6406	41.538	-1.0281
	0.1406	-163.04	8.7914	1.9655			0.1406	-3.543	41.693	0.75965
	0.1407	-163.75	8.5593	2.7624			0.1407	-3.8798	41.791	0.56647
	0.1408	-163.78	8.7082	6.5516			0.1408	-4.503	41.911	2.1561
	0.1409	-163.99	9.0728	5.3823			0.1409	-4.5567	42.208	2.0699
	0.141	-164.51	8.9701	2.5196			0.141	-4.3464	42.265	-1.4848
	0.1411	-165.17	8.7956	6.2769			0.1411	-4.0168	42.181	-5.9124
	0.1412	-165.63	8.7747	9.1944			0.1412	-3.8723	42.459	-6.3518
	0.1413	-166.26	8.78	9.7998			0.1413	-4.1865	42.544	-2.1633
	0.1414	-167.41	8.9774	10.648			0.1414	-4.3666	42.575	3.4136
	0.1415	-168.24	8.9896	4.1201			0.1415	-4.1608	42.921	9.0606
	0.1416	-168.92	8.9396	-20.97			0.1416	-4.142	42.855	5.8857
	0.1417	-169.58	9.2005	-62.448			0.1417	-3.9913	42.645	-2.8719
	0.1418	-169.83	9.2854	-77.838			0.1418	-3.7033	42.763	-4.7597
	0.1419	-170.2	9.3959	-36.186			0.1419	-3.5604	43.226	-1.1249
	0.142	-171.36	9.5405	19.183			0.142	-3.1754	43.316	1.803
	0.1421	-172.4	9.5006	51.59			0.1421	-3.0379	43.065	2.3225
	0.1422	-173.01	9.7171	57.495			0.1422	-2.951	42.945	-0.20296
	0.1423	-173.63	10.043	41.415			0.1423	-2.6074	43.083	-2.8504
	0.1424	-174.18	10.067	15.673			0.1424	-2.2313	43.296	-1.0637
	0.1425	-174.52	9.985	-2.5029			0.1425	-1.7329	43.093	3.8348
	0.1426	-174.98	10.286	-5.084			0.1426	-1.7848	43.033	7.6115
	0.1427	-175.61	10.46	-5.6546			0.1427	-1.6182	42.916	7.5282
	0.1428	-176.14	10.431	-9.2843			0.1428	-1.3742	42.855	2.8509
	0.1429	-176.41	10.464	-10.469			0.1429	-1.2123	43.092	-1.8814
	0.143	-176.88	10.58	-8.4492			0.143	-0.58964	43.184	-1.4265
	0.1431	-177.27	10.829	-4.2869			0.1431	-0.41617	42.968	-0.51575
	0.1432	-177.45	10.819	2.259			0.1432	-0.81073	42.736	-6.2996
	0.1433	-177.77	10.786	4.0633			0.1433	-0.83759	42.843	-10.472
	0.1434	-177.65	11.008	0.010964			0.1434	-0.66102	43.151	-7.8934
	0.1435	-177.79	11.142	-2.1845			0.1435	-0.61912	43.393	-1.46
	0.1436	-178.49	11.221	-3.2805			0.1436	-0.31818	43.729	4.6369
	0.1437	-179.03	11.233	-0.55375			0.1437	-0.21162	43.809	5.7168
	0.1438	-179.48	11.061	4.1069			0.1438	-0.14529	43.912	3.0256
	0.1439	-179.8	11.033	2.8587			0.1439	-0.18791	44.308	-2.1546
	0.144	-179.98	11.184	-1.3985			0.144	-0.44301	44.539	-3.0112
	0.1441	-180.3	11.323	-3.5369			0.1441	-0.53606	45.152	3.9032
	0.1442	-180.88	11.636	-0.65536			0.1442	-0.57297	45.858	6.0683
	0.1443	-182.05	11.599	0.67415			0.1443	-0.50661	46.151	1.0916
	0.1444	-183	11.529	-3.7054			0.1444	-0.37674	46.824	-3.7272
	0.1445	-183.3	11.942	-5.6226			0.1445	-0.57393	47.645	-2.2298
	0.1446	-183.84	11.953	-3.8013			0.1446	-0.83304	48.121	2.8346
	0.1447	-184.76	11.882	-2.6218			0.1447	-0.9036	48.862	6.5208
	0.1448	-185.42	11.966	3.5589			0.1448	-1.0286	49.724	3.7016
	0.1449	-186.31	12.17	11.208			0.1449	-1.1685	50.485	-4.4484
	0.145	-187.33	12.522	9.5282			0.145	-0.96201	51.141	-5.0123
	0.1451	-187.89	12.487	-0.90704			0.1451	-0.93724	51.821	-0.22196
	0.1452	-188.97	12.537	-6.6149			0.1452	-1.3365	53.01	1.6396
	0.1453	-190.14	12.718	-3.0921			0.1453	-1.5021	53.979	0.58732
	0.1454	-190.93	12.819	-0.9197			0.1454	-1.1528	54.605	-5.567
	0.1455	-191.68	13.154	-4.5965			0.1455	-1.2771	55.529	-10.12
	0.1456	-192.61	13.287	-5.7572			0.1456	-1.6266	56.551	-5.9689
	0.1457	-194.1	13.345	-1.1592			0.1457	-1.4499	57.573	0.54421
	0.1458	-194.86	13.398	5.0691			0.1458	-1.3687	58.53	2.1729
	0.1459	-195.52	13.437	6.6645			0.1459	-1.0942	59.415	0.33685
	0.146	-196.39	13.69	2.0097			0.146	-0.91683	60.387	-0.12554
	0.1461	-196.67	13.762	0.7037			0.1461	-1.4684	61.318	4.9265
	0.1462	-197.25	13.886	5.7411			0.1462	-1.6776	62.067	6.9755
	0.1463	-197.54	14.117	4.2391			0.1463	-1.1822	63.086	5.4581
	0.1464	-198.07	14.228	-3.2559			0.1464	-0.97335	63.967	3.7936
	0.1465	-198.69	14.159	-4.4817			0.1465	-0.70766	64.731	0.93761
	0.1466	-198.72	14.135	-2.8628			0.1466	-0.64199	65.777	1.2999
	0.1467	-198.48	14.428	-3.1748			0.1467	-0.71074	66.747	1.3952
	0.1468	-198.38	14.237	-0.31222			0.1468	-0.66494	67.684	-2.4739
	0.1469	-198.42	13.904	2.1409			0.1469	-0.9123	68.596	-4.4923
	0.147	-197.98	14.22	1.2223			0.147	-0.92315	69.365	-6.7586
	0.1471	-197.36	14.602	-1.3035			0.1471	-0.59526	70.345	-4.9805
	0.1472	-197.14	14.502	-4.2692			0.1472	-0.64842	71.556	1.7366
	0.1473	-197.02	14.465	-1.2568			0.1473	-1.1506	72.768	5.3807
	0.1474	-196.72	14.738	4.8337			0.1474	-1.0438	73.978	2.6303
	0.1475	-196.18	14.801	8.8488			0.1475	-0.64689	74.795	-0.57225
	0.1476	-195.46	14.547	7.0724			0.1476	-0.73223	75.925	3.0436
	0.1477	-194.93	14.749	3.4935			0.1477	-0.81401	77.149	7.6348
	0.1478	-194.58	14.993	5.9676			0.1478	-0.76237	78.303	2.2925
	0.1479	-193.11	14.893	11.478			0.1479	-0.7379	79.713	-9.1063
	0.148	-192.22	15.19	11.378			0.148	-0.91435	80.829	-9.6511
	0.1481	-192.26	15.527	-5.3321			0.1481	-0.88051	82.045	0.35009
	0.1482	-191.59	15.773	-36.087			0.1482	-0.69426	83.505	4.593
	0.1483	-191.12	15.938	-62.749			0.1483	-0.88509	84.691	-1.3655
	0.1484	-190.39	16.137	-58.225			0.1484	-1.0401	85.605	-6.2552
	0.1485	-189.49	16.537	-11.426			0.1485	-0.79389	86.773	-4.5449
	0.1486	-188.91	17.05	33.387			0.1486	-1.0305	88.193	2.2942
	0.1487	-188.36	17.481	47.553			0.1487	-1.4716	89.515	5.7391
	0.1488	-188.01	17.841	44.518			0.1488	-1.1584	90.844	1.8006
	0.1489	-187.37	18.093	33.625			0.1489	-0.9228	92.091	1.5462
	0.149	-186.88	18.516	16.067			0.149	-1.0642	92.921	4.4289
	0.1491	-186.48	19.244	-0.85329			0.1491	-1.2556	94.098	4.2615
	0.1492	-186	19.895	-9.0708			0.1492	-1.2294	95.646	1.531
	0.1493	-185.8	20.333	-11.159			0.1493	-1.1425	96.825	-5.0874
	0.1494	-185.51	20.812	-11.414			0.1494	-0.99573	97.954	-10.321
	0.1495	-184.9	21.331	-7.6537			0.1495	-0.68523	98.687	-8.783
	0.1496	-184.18	21.657	-4.9439			0.1496	-0.31038	99.478	-1.1268
	0.1497	-183.66	22.136	-6.0975			0.1497	-0.52071	100.76	7.0861
	0.1498	-183.43	22.561	-4.3811			0.1498	-0.87928	101.93	11.599
	0.1499	-182.98	22.969	-0.44094			0.1499	-0.7226	102.94	8.9713
	0.15	-182.51	23.555	2.7235			0.15	-0.48825	103.61	0.74531
	0.1501	-182.4	24.059	5.1844			0.1501	-0.30477	104.12	-5.4358
	0.1502	-181.69	24.357	5.3208			0.1502	-0.3595	104.85	-7.9187
	0.1503	-181.01	24.53	0.89634			0.1503	-0.25759	105.78	-5.7122
	0.1504	-180.74	24.649	-3.2979			0.1504	-0.18861	106.52	-1.1659
	0.1505	-180.33	24.697	-3.2293			0.1505	-0.24669	106.92	1.1852
	0.1506	-179.79	24.883	-2.7102			0.1506	-0.3794	107.49	0.39917
	0.1507	-179.37	25.046	-2.211			0.1507	-0.19747	108.23	-1.4133
	0.1508	-178.8	24.957	1.1618			0.1508	0.050339	108.86	-0.093394
	0.1509	-178.37	24.962	6.5819			0.1509	-0.19173	109.4	4.9079
	0.151	-177.97	24.922	5.7412			0.151	-0.20819	109.9	6.6857
	0.1511	-177.53	24.546	-2.2904			0.1511	-0.18758	110.3	3.4638
	0.1512	-177.55	24.368	-7.0561			0.1512	-0.31637	110.54	0.022081
	0.1513	-177.31	24.084	-4.6352			0.1513	-0.61282	111.07	-1.7717
	0.1514	-176.64	23.703	0.28183			0.1514	-0.80142	111.53	-2.4927
	0.1515	-176.27	23.713	4.4832			0.1515	-0.83304	111.73	-3.5178
	0.1516	-176.26	23.362	3.1437			0.1516	-1.1975	112.05	-5.6972
	0.1517	-176.43	22.767	-1.2899			0.1517	-1.4884	112.29	-6.9208
	0.1518	-176.18	22.39	-1.3707			0.1518	-1.5169	112.8	-4.7383
	0.1519	-175.93	22.102	1.4454			0.1519	-1.7444	113.21	-0.34217
	0.152	-175.86	21.752	0.55434			0.152	-2.2517	113.44	1.597
	0.1521	-175.76	21.292	1.2941			0.1521	-2.2659	113.65	3.0382
	0.1522	-176.19	20.966	1.9548			0.1522	-2.171	113.65	6.983
	0.1523	-176.16	20.842	-3.558			0.1523	-2.6512	113.95	6.3498
	0.1524	-175.98	20.587	-7.5936			0.1524	-2.9343	114.45	1.5387
	0.1525	-176.51	20.099	-5.9481			0.1525	-2.9747	114.75	-0.3122
	0.1526	-176.97	19.572	-0.60662			0.1526	-3.2687	114.71	-1.0694
	0.1527	-176.84	19.473	4.4574			0.1527	-3.5366	114.91	-0.90389
	0.1528	-176.83	19.266	3.7114			0.1528	-3.699	115.15	0.45185
	0.1529	-177.56	18.889	0.30658			0.1529	-3.6879	115.18	1.1391
	0.153	-178.22	19.002	2.9301			0.153	-3.8666	115.27	3.2039
	0.1531	-178.5	18.824	6.4562			0.1531	-4.081	115.08	-0.032618
	0.1532	-178.22	18.472	4.9775			0.1532	-4.2976	115.11	-6.3947
	0.1533	-178.31	18.352	0.21921			0.1533	-4.4348	115.27	-3.8203
	0.1534	-178.82	18.338	-3.5816			0.1534	-4.0221	115.08	1.9629
	0.1535	-178.89	18.213	-3.6917			0.1535	-4.0514	114.75	3.3148
	0.1536	-179.14	17.947	-4.2898			0.1536	-4.4658	114.53	0.24113
	0.1537	-179.41	17.779	-4.1871			0.1537	-4.3497	114.42	-2.1684
	0.1538	-179.27	17.936	0.26401			0.1538	-4.0422	114.28	-1.2124
	0.1539	-179.13	17.936	3.9263			0.1539	-3.8177	114.22	0.45295
	0.154	-179.46	17.873	3.7498			0.154	-3.8351	113.91	-0.34225
	0.1541	-179.76	17.915	-2.9443			0.1541	-3.8475	113.31	-3.2302
	0.1542	-179.92	17.752	-8.258			0.1542	-3.494	112.91	-1.9913
	0.1543	-180.1	17.579	-4.0634			0.1543	-3.2368	112.81	2.5621
	0.1544	-180.27	17.562	2.3246			0.1544	-3.1464	112.51	3.6207
	0.1545	-180.52	17.84	6.1566			0.1545	-3.2141	112.25	3.0312
	0.1546	-180.67	17.873	7.1036			0.1546	-3.1655	112	2.6532
	0.1547	-181.03	17.607	6.9388			0.1547	-2.9308	111.67	3.0092
	0.1548	-181.39	17.432	3.2746			0.1548	-2.4167	111.2	1.9776
	0.1549	-181.53	17.465	0.38938			0.1549	-2.296	110.59	-0.65192
	0.155	-181.9	17.522	3.8624			0.155	-2.1011	110.18	-4.8338
	0.1551	-182.28	17.361	7.1715			0.1551	-1.4357	109.86	-5.0882
	0.1552	-182.49	17.074	5.7075			0.1552	-1.5044	109.49	-0.015564
	0.1553	-182.86	16.911	7.0447			0.1553	-1.8325	109.24	3.7693
	0.1554	-183.52	16.995	10.735			0.1554	-1.7489	108.89	3.3058
	0.1555	-184.21	16.807	8.1482			0.1555	-1.1569	108.3	-3.1933
	0.1556	-184.98	16.423	-11.305			0.1556	-0.60285	107.91	-6.7954
	0.1557	-186.08	16.524	-48.724			0.1557	-0.76568	107.64	-3.1108
	0.1558	-186.89	16.491	-70.817			0.1558	-0.94227	107.36	0.84273
	0.1559	-187.12	16.258	-45.896			0.1559	-0.99754	106.99	3.3905
	0.156	-187.88	15.993	3.7775			0.156	-1.0951	106.75	0.69105
	0.1561	-189.15	15.97	37.708			0.1561	-0.95519	106.41	1.5883
	0.1562	-190.15	16.017	47.576			0.1562	-1.0053	105.85	6.9369
	0.1563	-191.15	15.893	41.974			0.1563	-1.1209	105.48	4.4948
	0.1564	-192.13	15.889	24.797			0.1564	-0.96541	105.26	-4.3159
	0.1565	-193.05	15.554	7.6329			0.1565	-0.74628	105.01	-7.0679
	0.1566	-193.98	15.677	-3.578			0.1566	-0.92285	104.82	-2.8599
	0.1567	-194.82	15.775	-9.3465			0.1567	-1.2336	104.23	1.0552
	0.1568	-195.44	15.513	-9.5715			0.1568	-1.3695	103.47	1.4096
	0.1569	-196.03	15.367	-10.147			0.1569	-1.4015	103.21	2.148
	0.157	-197.07	15.495	-9.222			0.157	-1.1837	103.12	4.7667
	0.1571	-198.27	15.645	-5.1846			0.1571	-1.0351	103.07	2.9431
	0.1572	-199.27	15.621	-2.4325			0.1572	-1.1534	102.95	-2.0631
	0.1573	-200.31	15.664	-0.66886			0.1573	-1.3244	102.74	-5.3232
	0.1574	-200.84	15.525	-0.065386			0.1574	-1.3536	102.59	-1.9454
	0.1575	-201.15	15.556	-3.9806			0.1575	-1.4582	102.27	3.7538
	0.1576	-201.94	15.614	-6.8152			0.1576	-1.7284	102.1	2.2048
	0.1577	-202.5	15.634	-0.074786			0.1577	-1.8149	102.23	-3.3819
	0.1578	-202.95	15.437	9.3238			0.1578	-1.3924	102.26	-5.7405
	0.1579	-203.66	15.51	8.616			0.1579	-1.0759	102.34	-3.8607
	0.158	-204.24	16.045	4.5768			0.158	-1.2467	102.28	0.87643
	0.1581	-204.42	15.66	1.3223			0.1581	-1.4992	102.13	2.4866
	0.1582	-204.65	15.191	-1.9259			0.1582	-1.529	102.1	3.1037
	0.1583	-205.07	15.24	-3.1448			0.1583	-1.4618	102.05	4.5262
	0.1584	-205.3	15.044	-4.2706			0.1584	-1.1031	102.14	1.8117
	0.1585	-205.44	15.216	-3.5379			0.1585	-0.77615	102.3	-0.11336
	0.1586	-205.38	15.265	-2.0976			0.1586	-0.59503	102.6	-2.7006
	0.1587	-205.45	15.221	-0.52168			0.1587	-0.81352	102.65	-6.0842
	0.1588	-206.39	15.277	-0.58765			0.1588	-0.98856	102.71	-5.0745
	0.1589	-207.17	15.04	0.75847			0.1589	-0.71101	102.82	0.39381
	0.159	-207.24	14.905	7.4451			0.159	-0.62194	102.92	4.9201
	0.1591	-207.43	14.795	11.593			0.1591	-0.71382	103.29	2.4101
	0.1592	-207.78	14.75	8.1657			0.1592	-0.82057	103.52	-0.10097
	0.1593	-208.44	14.835	-0.74064			0.1593	-0.77564	103.51	4.1629
	0.1594	-209.08	14.772	-6.3705			0.1594	-0.64465	103.53	5.651
	0.1595	-209.6	14.575	-7.4807			0.1595	-0.52455	104.06	0.70866
	0.1596	-210.33	14.635	-6.9239			0.1596	-0.58484	104.57	-4.3774
	0.1597	-210.67	14.833	-3.0316			0.1597	-0.58354	104.62	-5.6207
	0.1598	-211.32	14.855	2.1806			0.1598	-0.49417	104.37	-3.0259
	0.1599	-212.5	14.666	5.7309			0.1599	-0.45423	104.57	1.8307
	0.16	-213.26	14.564	4.8974			0.16	-0.42055	105.12	7.4609
	0.1601	-213.74	14.493	2.1555			0.1601	-0.2224	105.61	10.55
	0.1602	-214.17	14.607	-2.9246			0.1602	-0.17959	105.71	4.7064
	0.1603	-215.06	14.777	-4.4592			0.1603	-0.2044	105.57	-2.5564
	0.1604	-216.33	14.929	-0.066093			0.1604	0.030422	105.95	-5.847
	0.1605	-217.53	14.827	3.2746			0.1605	0.0095887	106.49	-5.4126
	0.1606	-218.01	14.662	5.1137			0.1606	-0.086629	106.67	-3.4201
	0.1607	-218.32	15.048	7.0796			0.1607	-0.24207	106.68	-1.7307
	0.1608	-219.33	15.333	5.3237			0.1608	-0.54517	106.82	-1.504
	0.1609	-220.4	15.301	6.8131			0.1609	-0.26946	107.1	-2.9719
	0.161	-221.48	15.107	11.814			0.161	-0.00059121	107.33	-0.79634
	0.1611	-221.97	15.284	9.4004			0.1611	-0.29817	107.6	0.51646
	0.1612	-222.4	15.549	0.48675			0.1612	-0.54663	107.75	-1.2869
	0.1613	-223.33	15.368	-17.754			0.1613	-0.65051	108.06	1.7453
	0.1614	-223.99	15.343	-46.438			0.1614	-0.80206	108.22	6.8314
	0.1615	-224.79	15.712	-59.178			0.1615	-0.76883	107.98	8.3024
	0.1616	-225.58	15.916	-33.294			0.1616	-0.86727	108.37	4.4304
	0.1617	-226.47	15.945	6.1076			0.1617	-1.1088	108.74	-3.4661
	0.1618	-227.35	15.782	30.517			0.1618	-1.4914	108.71	-9.6642
	0.1619	-227.9	15.483	34.859			0.1619	-1.7284	108.83	-10.572
	0.162	-228.54	15.847	26.223			0.162	-1.8435	108.81	-5.5776
	0.1621	-229.59	16.152	16.02			0.1621	-2.235	109.12	-1.3772
	0.1622	-230.46	15.775	12.374			0.1622	-2.886	109.67	-2.1924
	0.1623	-231.1	15.892	8.1943			0.1623	-3.4808	110.09	-2.0756
	0.1624	-232.16	16.025	-0.34719			0.1624	-3.5183	110.36	1.9808
	0.1625	-233.24	15.805	-5.6658			0.1625	-3.8439	110.77	6.7862
	0.1626	-234.15	15.801	-3.0758			0.1626	-4.3855	111.23	8.6384
	0.1627	-235	15.904	1.1307			0.1627	-4.8792	111.69	3.028
	0.1628	-235.62	15.823	1.002			0.1628	-5.7075	112.4	-6.112
	0.1629	-236.47	15.691	0.34304			0.1629	-6.2397	113.03	-6.4715
	0.163	-237.74	15.631	-1.1993			0.163	-6.4915	113.6	1.3903
	0.1631	-238.83	15.478	-7.7838			0.1631	-7.0911	114.42	4.2233
	0.1632	-239.7	15.432	-13.662			0.1632	-8.0643	115.19	2.0898
	0.1633	-240.54	15.242	-13.631			0.1633	-8.5805	115.78	0.43712
	0.1634	-241.19	15.058	-8.8054			0.1634	-8.8335	116.46	1.3867
	0.1635	-241.83	14.922	-0.53641			0.1635	-9.2768	117.18	5.9165
	0.1636	-242.92	14.732	5.4718			0.1636	-10.493	117.72	6.3167
	0.1637	-244.05	14.828	8.3613			0.1637	-11.375	118.74	-2.0922
	0.1638	-244.2	14.691	6.9895			0.1638	-11.448	119.97	-10.947
	0.1639	-244.75	14.608	5.5218			0.1639	-12.164	120.51	-11.61
	0.164	-245.73	14.529	4.6795			0.164	-12.633	121.02	-3.3595
	0.1641	-246.1	14.301	0.85314			0.1641	-12.62	121.76	4.2863
	0.1642	-246.47	14.167	-1.6921			0.1642	-13.044	122.67	6.3777
	0.1643	-246.84	14.146	-0.99459			0.1643	-13.888	123.69	3.1402
	0.1644	-247.3	14.392	0.31754			0.1644	-14.452	124.34	0.78446
	0.1645	-247.36	14.326	0.096772			0.1645	-14.508	124.82	0.091074
	0.1646	-247.23	13.919	0.96882			0.1646	-14.723	125.3	-2.7565
	0.1647	-247.68	13.847	0.057536			0.1647	-14.797	125.93	-1.1921
	0.1648	-247.75	14.086	-5.3927			0.1648	-14.979	126.61	3.471
	0.1649	-247.59	14.339	-9.0018			0.1649	-15.431	126.94	5.7674
	0.165	-247.4	14.291	-3.9623			0.165	-15.747	127.17	5.0734
	0.1651	-246.99	14.103	4.8697			0.1651	-15.908	127.44	3.7909
	0.1652	-246.85	14.424	8.2013			0.1652	-15.774	127.61	1.2801
	0.1653	-246.65	14.603	5.0209			0.1653	-15.907	127.84	-2.2096
	0.1654	-246.32	14.649	2.6409			0.1654	-16.292	127.92	-1.7472
	0.1655	-245.95	14.93	1.7556			0.1655	-16.28	127.88	-1.0765
	0.1656	-245.48	15.063	0.7191			0.1656	-15.68	128.19	-3.7382
	0.1657	-244.94	15.333	-1.8727			0.1657	-15.505	128.18	-5.9874
	0.1658	-244.68	15.838	-2.7211			0.1658	-15.892	127.88	-6.9989
	0.1659	-244.36	16.083	0.176			0.1659	-15.936	127.98	-5.4289
	0.166	-243.95	16.253	0.98575			0.166	-15.74	128.04	2.8502
	0.1661	-243.78	16.466	-3.2631			0.1661	-15.509	127.75	11.85
	0.1662	-243.81	16.847	-4.9432			0.1662	-15.425	127.65	10.461
	0.1663	-243.78	17.323	-0.98313			0.1663	-15.325	128.03	4.4099
	0.1664	-243.73	17.71	4.242			0.1664	-15.2	128.05	-0.91082
	0.1665	-243.89	17.866	3.9975			0.1665	-15.446	127.76	-6.1762
	0.1666	-244.05	18.178	-6.269			0.1666	-15.684	127.85	-5.0449
	0.1667	-244.34	19.002	-17.421			0.1667	-15.772	127.92	1.1315
	0.1668	-244.77	19.672	-11.303			0.1668	-15.816	128.01	1.496
	0.1669	-245.15	19.763	6.1427			0.1669	-15.609	127.97	-0.8636
	0.167	-245.84	19.805	11.345			0.167	-15.578	128.05	-0.032437
	0.1671	-247.04	20.301	5.4256			0.1671	-15.57	128.42	1.5806
	0.1672	-247.62	20.945	3.1641			0.1672	-15.58	128.83	-2.7081
	0.1673	-248.36	21.349	2.3684			0.1673	-15.928	129.13	-7.2147
	0.1674	-249.47	21.596	1.431			0.1674	-15.549	129.42	-4.8749
	0.1675	-250.31	21.93	2.6186			0.1675	-15.396	129.92	-1.2709
	0.1676	-251.32	22.214	8.2828			0.1676	-15.88	130.35	0.46787
	0.1677	-252.79	22.498	11.917			0.1677	-15.799	130.95	-0.16405
	0.1678	-254.3	22.745	14.741			0.1678	-15.333	131.7	-2.0362
	0.1679	-255.15	23.085	16.147			0.1679	-15.433	132.45	0.68361
	0.168	-256.28	23.57	3.8663			0.168	-15.595	133.25	3.4102
	0.1681	-257.78	23.585	-22.493			0.1681	-15.625	133.74	3.5817
	0.1682	-258.95	23.817	-52.657			0.1682	-16.122	134.21	4.7893
	0.1683	-260.17	24.472	-60.047			0.1683	-16.004	135.08	6.8062
	0.1684	-261.39	24.759	-29.103			0.1684	-15.613	135.79	5.5565
	0.1685	-262.76	24.61	7.9448			0.1685	-15.775	136.33	0.6409
	0.1686	-263.58	24.682	30.832			0.1686	-15.738	137.01	-4.9989
	0.1687	-264.37	24.984	39.917			0.1687	-15.646	137.42	-7.5073
	0.1688	-265.85	25.277	35.096			0.1688	-15.992	137.89	-6.4674
	0.1689	-266.83	25.506	19.897			0.1689	-15.841	138.63	-5.4591
	0.169	-267.28	25.266	5.117			0.169	-15.423	138.92	-4.328
	0.1691	-267.96	25.176	-4.4087			0.1691	-15.287	138.92	0.18014
	0.1692	-269	25.445	-6.3906			0.1692	-14.903	139.23	3.8696
	0.1693	-269.93	25.754	-3.3337			0.1693	-15.016	139.65	4.6185
	0.1694	-270.71	25.993	0.57376			0.1694	-15.339	139.74	1.1211
	0.1695	-270.88	26.019	-1.6313			0.1695	-14.99	139.74	-2.8604
	0.1696	-270.69	25.847	-11.173			0.1696	-14.745	139.8	-3.4705
	0.1697	-271.15	25.921	-10.54			0.1697	-14.846	139.55	2.1068
	0.1698	-271.9	26.27	-0.55158			0.1698	-14.883	139.47	8.8874
	0.1699	-272.29	26.623	2.5503			0.1699	-14.77	139.38	8.2859
	0.17	-272.33	26.805	-2.1169			0.17	-14.445	138.68	-1.1251
	0.1701	-272.29	26.855	-5.9494			0.1701	-14.35	138.3	-6.0405
	0.1702	-272.28	26.791	-2.0183			0.1702	-14.56	138.11	-3.4797
	0.1703	-272.41	27.002	5.6067			0.1703	-14.73	137.68	-1.2657
	0.1704	-272.55	27.199	8.8659			0.1704	-14.367	137.25	-0.12438
	0.1705	-272.61	27.193	7.305			0.1705	-14.287	136.76	-0.059411
	0.1706	-272.6	27.195	3.0303			0.1706	-14.564	136.09	0.1509
	0.1707	-272.33	27.214	-1.5826			0.1707	-14.358	135.53	-0.5908
	0.1708	-272.47	27.501	-3.687			0.1708	-14.058	135.04	0.23375
	0.1709	-272.86	27.57	-5.5106			0.1709	-13.685	134.62	4.2302
	0.171	-272.81	27.918	-7.4722			0.171	-13.829	134.08	4.4042
	0.1711	-272.64	28.024	-6.3992			0.1711	-14.283	133.42	1.8321
	0.1712	-272.7	27.798	-0.51451			0.1712	-14.615	133.03	-0.67427
	0.1713	-273.06	27.788	5.2414			0.1713	-14.772	132.53	-2.3931
	0.1714	-273.59	27.884	7.899			0.1714	-14.612	132.21	-2.8555
	0.1715	-273.54	28.052	6.193			0.1715	-14.59	132.17	-1.8252
	0.1716	-273.71	28.067	0.31022			0.1716	-14.825	131.97	0.22983
	0.1717	-274.41	27.974	-2.9517			0.1717	-15.078	131.55	2.2065
	0.1718	-274.57	27.953	-3.4839			0.1718	-15.261	131.27	4.6527
	0.1719	-274.76	28.021	-2.3113			0.1719	-15.329	131.36	5.8988
	0.172	-275.24	27.896	2.2296			0.172	-15.543	131.62	2.3746
	0.1721	-275.66	27.779	5.6963			0.1721	-15.759	131.81	-4.0191
	0.1722	-276.1	27.517	5.8887			0.1722	-15.717	131.8	-6.582
	0.1723	-276.83	27.203	2.4104			0.1723	-15.763	131.59	-4.3043
	0.1724	-277.48	27.245	-0.17176			0.1724	-16.284	131.61	-1.5251
	0.1725	-277.65	27.575	-2.0719			0.1725	-16.408	132.23	-3.2299
	0.1726	-278.22	27.533	-7.4808			0.1726	-16.088	132.78	-6.3847
	0.1727	-278.81	27.168	-13.551			0.1727	-16.388	132.92	-5.2699
	0.1728	-279.27	27.034	-9.8986			0.1728	-16.94	133.12	0.96814
	0.1729	-280.32	27.08	-0.35627			0.1729	-17.188	133.3	6.4895
	0.173	-280.59	27.04	3.3091			0.173	-17.156	133.52	4.8388
	0.1731	-280.59	26.877	6.3886			0.1731	-17.37	133.88	-0.8199
	0.1732	-281.37	27.004	8.8054			0.1732	-17.826	134.29	-4.5198
	0.1733	-282.19	27.411	4.561			0.1733	-18.161	134.61	-2.0823
	0.1734	-282.81	27.492	0.62309			0.1734	-18.022	134.73	5.0386
	0.1735	-282.76	27.377	-1.4717			0.1735	-18.168	135.09	7.0889
	0.1736	-283.33	27.423	-0.23939			0.1736	-18.453	135.51	3.0937
	0.1737	-284.25	27.598	1.7289			0.1737	-18.615	135.47	-1.104
	0.1738	-284.3	27.756	-2.1454			0.1738	-18.946	135.26	-4.5865
	0.1739	-284.65	27.919	-4.2741			0.1739	-18.845	135.19	-6.5713
	0.174	-285.16	28.26	0.39566			0.174	-18.881	135.28	0.62223
	0.1741	-285.65	28.658	5.3198			0.1741	-19.28	135.19	6.8549
	0.1742	-286.01	28.794	7.3525			0.1742	-19.497	134.89	6.7759
	0.1743	-286.36	28.748	5.6031			0.1743	-19.572	134.7	6.442
	0.1744	-286.96	28.844	0.48964			0.1744	-19.733	134.07	2.9689
	0.1745	-287.52	29.154	-1.8107			0.1745	-19.741	133.71	-2.7474
	0.1746	-287.98	29.406	6.0873			0.1746	-19.801	133.56	-3.5804
	0.1747	-287.75	29.548	12.772			0.1747	-20.19	133.07	-2.9294
	0.1748	-287.83	29.807	8.9412			0.1748	-20.318	132.55	-4.3821
	0.1749	-288.45	30.009	-10.767			0.1749	-20.226	131.88	-5.6461
	0.175	-289.04	30.202	-45.193			0.175	-20.107	131.2	-1.9622
	0.1751	-289.43	30.377	-65.264			0.1751	-20.106	130.4	2.8703
	0.1752	-289.48	30.43	-49.537			0.1752	-20.345	130.04	1.4207
	0.1753	-289.63	30.548	-3.2531			0.1753	-20.23	129.81	-2.9937
	0.1754	-289.98	30.703	38.485			0.1754	-20.115	129.14	-0.73543
	0.1755	-290.45	30.952	48.804			0.1755	-20.311	128.35	5.3333
	0.1756	-290.54	31.108	40.778			0.1756	-20.237	127.57	5.9631
	0.1757	-290.68	31.005	29.797			0.1757	-20.068	126.92	0.27156
	0.1758	-290.8	30.932	16.207			0.1758	-20.107	126.28	-1.3488
	0.1759	-291.13	30.919	1.4012			0.1759	-20.143	125.88	1.4942
	0.176	-291.8	30.844	-2.9867			0.176	-20.016	125.3	0.97766
	0.1761	-291.92	30.826	-5.0673			0.1761	-19.72	124.52	-0.55803
	0.1762	-292.23	30.795	-7.605			0.1762	-19.948	124.23	-1.7895
	0.1763	-292.57	30.477	-5.8073			0.1763	-20.334	123.91	-2.9197
	0.1764	-293.02	30.337	-3.9162			0.1764	-20.419	123.63	-1.4915
	0.1765	-293.44	30.397	-5.4647			0.1765	-20.212	123.3	1.2442
	0.1766	-293.65	30.185	-9.1851			0.1766	-20.139	122.75	3.854
	0.1767	-293.7	30.009	-7.6584			0.1767	-20.362	122.75	6.3265
	0.1768	-294.2	29.789	-2.0722			0.1768	-20.656	122.86	4.7527
	0.1769	-295.09	29.661	-1.1444			0.1769	-20.72	122.53	1.5221
	0.177	-295.43	29.607	-2.7795			0.177	-20.44	122.52	-0.87699
	0.1771	-295.54	29.75	0.25225			0.1771	-20.657	122.86	-0.78081
	0.1772	-295.47	29.793	3.4129			0.1772	-21.056	122.92	-3.4443
	0.1773	-295.73	29.582	0.23738			0.1773	-21.085	123.01	-5.9532
	0.1774	-296.36	29.575	0.0088937			0.1774	-21.231	123.3	-6.3374
	0.1775	-296.65	29.596	5.4945			0.1775	-21.357	123.5	-6.4238
	0.1776	-296.66	29.609	4.9279			0.1776	-21.237	123.72	-2.4961
	0.1777	-296.62	29.573	2.6746			0.1777	-21.489	124.3	-1.5517
	0.1778	-296.51	29.912	-0.13575			0.1778	-21.865	124.82	-4.525
	0.1779	-296.51	30.4	-6.2852			0.1779	-21.999	125.28	-1.1792
	0.178	-296.79	30.555	-5.6012			0.178	-22.191	126.05	4.8485
	0.1781	-296.88	30.46	-2.3739			0.1781	-22.298	126.82	7.8338
	0.1782	-296.55	30.49	-1.0872			0.1782	-22.11	127.43	7.726
	0.1783	-296.14	30.865	1.5699			0.1783	-22.404	128.24	1.8993
	0.1784	-295.9	31.337	2.4627			0.1784	-22.833	129.1	-5.9304
	0.1785	-295.65	31.728	2.3655			0.1785	-22.716	129.54	-7.8816
	0.1786	-295.31	32.236	6.0068			0.1786	-22.569	130.34	-6.3824
	0.1787	-294.81	32.667	4.3746			0.1787	-22.673	131.46	-3.2719
	0.1788	-294.54	33.051	-2.1234			0.1788	-22.703	132.52	1.6448
	0.1789	-294.21	33.462	-3.1276			0.1789	-22.777	133.5	4.8022
	0.179	-293.26	33.678	-0.97683			0.179	-22.733	133.93	4.2098
	0.1791	-292.62	34.085	0.76876			0.1791	-22.479	134.66	2.0414
	0.1792	-292.05	34.728	-1.8965			0.1792	-22.433	135.77	1.0235
	0.1793	-291.52	35.23	-3.7692			0.1793	-22.671	136.48	0.73224
	0.1794	-291.09	35.575	1.7117			0.1794	-22.966	137.22	0.61395
	0.1795	-290.43	35.884	8.8328			0.1795	-22.844	138.13	2.005
	0.1796	-289.59	36.033	11.728			0.1796	-22.716	139.06	2.4373
	0.1797	-288.75	36.3	5.6729			0.1797	-22.859	139.76	1.2508
	0.1798	-288.12	36.713	-3.1502			0.1798	-22.7	140.17	-0.49895
	0.1799	-287.45	37.002	-2.9308			0.1799	-22.548	140.64	-0.93682
	0.18	-287.16	37.424	1.2557			0.18	-23.027	141.23	0.82551
	0.1801	-286.73	37.687	-6.1824			0.1801	-23.741	141.75	1.2657
	0.1802	-285.86	37.617	-33.742			0.1802	-23.556	142.2	-1.2452
	0.1803	-285.39	37.548	-55.495			0.1803	-23.233	142.37	-3.3351
	0.1804	-285.17	37.994	-38.914			0.1804	-23.754	142.63	-3.3166
	0.1805	-284.55	38.44	1.2596			0.1805	-23.918	142.78	-3.2377
	0.1806	-283.86	38.492	30.772			0.1806	-23.995	142.72	-3.1687
	0.1807	-283.84	38.548	41.241			0.1807	-24.246	142.92	-0.35963
	0.1808	-284.26	38.63	40.873			0.1808	-24.397	142.79	3.1194
	0.1809	-283.83	39.111	30.056			0.1809	-24.851	142.54	4.1259
	0.181	-283.2	39.352	16.159			0.181	-25.413	142.43	1.6795
	0.1811	-283.69	39.066	6.4546			0.1811	-25.83	142.37	2.355
	0.1812	-283.74	39.079	-2.2501			0.1812	-25.816	142.19	7.6071
	0.1813	-283.56	39.517	-7.4543			0.1813	-25.563	141.51	2.9943
	0.1814	-283.97	39.825	-9.6765			0.1814	-25.823	141.26	-4.1083
	0.1815	-284.29	40.133	-10.708			0.1815	-26.437	141.04	-4.4672
	0.1816	-284.34	40.247	-10.787			0.1816	-27.226	140.5	-2.3569
	0.1817	-284.5	40.356	-10.433			0.1817	-27.646	139.94	0.75177
	0.1818	-285.15	40.72	-5.388			0.1818	-27.506	139.41	0.765
	0.1819	-285.67	41.025	-3.2033			0.1819	-27.376	138.93	0.25171
	0.182	-285.98	41.379	-5.2531			0.182	-27.571	138.23	2.3358
	0.1821	-286.3	41.982	-5.1908			0.1821	-28.083	137.73	4.1651
	0.1822	-286.76	42.471	0.15949			0.1822	-28.047	137.39	2.1999
	0.1823	-287.5	42.858	8.143			0.1823	-27.715	136.75	-1.5912
	0.1824	-288.13	43.655	10.895			0.1824	-27.658	136.24	-1.2783
	0.1825	-288.82	44.296	8.2258			0.1825	-27.788	135.72	-0.060848
	0.1826	-288.89	44.889	2.5481			0.1826	-28.02	135.04	-2.1316
	0.1827	-288.84	45.761	-5.7566			0.1827	-27.665	134.66	-4.1356
	0.1828	-289.45	46.585	-10.534			0.1828	-27.2	134.31	-6.0101
	0.1829	-290.16	47.13	-8.9135			0.1829	-27.017	134.01	-5.0058
	0.183	-290.59	47.768	-2.3938			0.183	-26.891	133.73	-1.9822
	0.1831	-291.05	49.075	5.4974			0.1831	-26.72	133.34	-1.2231
	0.1832	-291.5	49.819	9.3536			0.1832	-26.695	132.92	0.94587
	0.1833	-291.7	50.287	2.9562			0.1833	-26.759	132.35	6.2759
	0.1834	-292.01	51.483	-5.8585			0.1834	-26.455	131.99	5.9706
	0.1835	-292.2	52.235	-5.5178			0.1835	-26.247	132.02	0.14294
	0.1836	-292.9	52.77	2.105			0.1836	-26.06	131.74	1.0984
	0.1837	-293.46	53.336	9.3606			0.1837	-25.997	131.32	5.6731
	0.1838	-293.93	54.06	6.2126			0.1838	-26.092	130.98	4.9057
	0.1839	-294.89	55.062	-1.2427			0.1839	-26.016	130.9	1.4854
	0.184	-295.33	55.862	-3.8526			0.184	-26.008	130.82	-2.4295
	0.1841	-295.54	56.341	-4.2038			0.1841	-26.028	130.57	-5.886
	0.1842	-296.17	56.797	-3.099			0.1842	-26.132	130.6	-7.2852
	0.1843	-296.88	57.305	0.095731			0.1843	-26.588	130.44	-6.0439
	0.1844	-297.31	57.724	0.36124			0.1844	-26.818	130.54	-2.4025
	0.1845	-298.01	58.15	-2.0419			0.1845	-26.849	130.58	1.5947
	0.1846	-298.93	58.359	-1.6727			0.1846	-27.364	130.5	0.46916
	0.1847	-299.21	58.526	1.2336			0.1847	-28.088	130.83	-0.9922
	0.1848	-299.72	58.851	4.5181			0.1848	-28.664	131.12	3.7524
	0.1849	-300.75	59.168	3.7867			0.1849	-29.25	131.19	5.6105
	0.185	-301.52	59.211	-0.37925			0.185	-29.66	131.27	-0.89357
	0.1851	-302.22	59.044	-5.3218			0.1851	-30.265	131.71	-7.2654
	0.1852	-303.11	59.165	-6.1474			0.1852	-30.887	131.82	-8.3659
	0.1853	-304.04	59.121	-4.0894			0.1853	-31.613	132.08	-4.6945
	0.1854	-304.92	58.696	-2.5568			0.1854	-32.478	132.72	3.9761
	0.1855	-305.94	58.601	-0.47554			0.1855	-33.081	132.86	10.793
	0.1856	-306.7	58.79	4.3057			0.1856	-34.084	133.05	11.081
	0.1857	-307.42	58.673	8.9573			0.1857	-34.641	133.51	4.3953
	0.1858	-308.44	58.473	8.637			0.1858	-34.85	133.83	-2.081
	0.1859	-309.54	58.282	7.6066			0.1859	-35.571	134.24	-1.5173
	0.186	-310.61	57.865	7.3969			0.186	-36.198	134.86	-0.40252
	0.1861	-311.73	57.677	8.3337			0.1861	-37.026	135.41	-2.1192
	0.1862	-312.7	57.52	9.5621			0.1862	-37.916	135.72	-0.55976
	0.1863	-313.4	57.266	8.3897			0.1863	-38.454	135.87	3.5734
	0.1864	-314.05	57.045	-0.40405			0.1864	-38.703	136.33	3.8542
	0.1865	-314.94	56.742	-22.145			0.1865	-38.539	136.71	-1.0706
	0.1866	-316.02	56.572	-55.588			0.1866	-39.217	136.81	-6.831
	0.1867	-317.13	56.46	-70.423			0.1867	-40.006	137.22	-8.8139
	0.1868	-318	56.171	-37.765			0.1868	-39.849	137.71	-2.7595
	0.1869	-318.57	55.817	13.875			0.1869	-40.039	137.91	6.6587
	0.187	-319.44	55.499	46.448			0.187	-40.903	137.95	7.5377
	0.1871	-319.87	55.307	52.279			0.1871	-41.175	137.89	0.28744
	0.1872	-320.02	55.39	41.252			0.1872	-40.606	138.01	-2.5441
	0.1873	-320.4	55.37	24.612			0.1873	-40.693	138.11	-1.183
	0.1874	-320.71	55.225	9.8855			0.1874	-41.451	138.03	-0.84983
	0.1875	-321.59	55.084	0.1942			0.1875	-41.78	138.05	-0.63962
	0.1876	-321.87	54.889	-8.4744			0.1876	-41.65	137.86	2.484
	0.1877	-321.54	54.991	-14.202			0.1877	-41.548	137.6	3.7375
	0.1878	-321.45	55.133	-15.132			0.1878	-41.742	137.55	-0.037168
	0.1879	-321.4	55.101	-11.589			0.1879	-41.972	137.42	-3.3162
	0.188	-321.38	55.232	-4.4194			0.188	-42.235	137.28	-1.7867
	0.1881	-321.21	55.258	3.3026			0.1881	-42.484	137.07	-0.23469
	0.1882	-321.03	55.148	3.6593			0.1882	-42.529	136.72	-2.7295
	0.1883	-320.71	55.526	0.98167			0.1883	-42.456	136.51	-6.3326
	0.1884	-320.58	55.641	0.14823			0.1884	-42.431	136.39	-2.3452
	0.1885	-320.84	55.5	-1.6951			0.1885	-42.88	136.32	4.1906
	0.1886	-320.31	55.644	-1.3145			0.1886	-42.904	136.04	6.4963
	0.1887	-319.35	55.89	-2.0189			0.1887	-42.728	135.88	6.5673
	0.1888	-319.53	56.273	-3.0107			0.1888	-43.172	135.95	3.9902
	0.1889	-319.56	56.415	-1.2928			0.1889	-43.436	135.84	-0.15358
	0.189	-318.98	56.72	0.64878			0.189	-43.899	135.66	-3.1325
	0.1891	-318.75	56.966	1.3198			0.1891	-44.354	135.99	-2.3716
	0.1892	-318.74	57.24	-2.5139			0.1892	-44.477	136.08	-0.97153
	0.1893	-319.12	57.781	-4.6205			0.1893	-44.312	135.88	-0.92601
	0.1894	-318.83	58.019	0.90947			0.1894	-44.571	136.29	-1.9892
	0.1895	-318.88	58.249	6.745			0.1895	-45.258	136.62	-3.1803
	0.1896	-319.4	58.747	0.99086			0.1896	-45.464	136.91	0.93994
	0.1897	-319.38	59.135	-4.8988			0.1897	-45.459	137.5	3.1857
	0.1898	-320.07	59.443	-0.20767			0.1898	-45.345	137.84	-1.0311
	0.1899	-320.62	59.891	6.3195			0.1899	-45.797	138.37	-1.7172
	0.19	-321.15	60.128	5.7734			0.19	-46.168	139.25	2.8206
	0.1901	-321.81	60.364	3.4893			0.1901	-46.192	139.94	2.1107
	0.1902	-322.6	60.637	5.0287			0.1902	-46.138	140.48	-2.5523
	0.1903	-323.34	61.032	3.6399			0.1903	-46.043	141.14	-4.7897
	0.1904	-323.97	61.497	-1.5122			0.1904	-46.357	142.33	-2.6865
	0.1905	-324.94	61.677	-2.4432			0.1905	-46.233	143.16	-0.10554
	0.1906	-326.05	61.802	-0.55683			0.1906	-45.884	143.61	1.4031
	0.1907	-327.03	62.191	-3.9447			0.1907	-46.211	144.2	2.3124
	0.1908	-327.94	62.974	-6.3794			0.1908	-46.279	144.85	0.79041
	0.1909	-329.12	63.484	-6.1449			0.1909	-46.247	145.74	0.2703
	0.191	-330.11	63.556	-6.1552			0.191	-46.293	146.25	-1.6124
	0.1911	-330.79	63.639	-4.787			0.1911	-45.896	146.54	-5.9405
	0.1912	-331.82	64.052	1.8955			0.1912	-45.621	147.34	-3.5889
	0.1913	-332.95	64.352	8.915			0.1913	-45.529	148.02	3.9775
	0.1914	-333.82	64.524	4.1819			0.1914	-45.272	148.23	4.9703
	0.1915	-334.84	65.137	-4.1021			0.1915	-45.015	148.38	2.6617
	0.1916	-335.85	65.372	-2.1807			0.1916	-44.875	148.62	2.4916
	0.1917	-337.08	65.298	0.74021			0.1917	-44.737	149.1	0.37827
	0.1918	-337.68	65.426	0.62352			0.1918	-44.57	149.44	-1.5531
	0.1919	-337.83	65.755	0.16406			0.1919	-44.422	149.46	-0.82678
	0.192	-338.77	66.121	1.0987			0.192	-44.142	149.73	1.1565
	0.1921	-339.87	66.383	2.2703			0.1921	-43.837	150.05	2.2084
	0.1922	-340.36	66.887	1.5082			0.1922	-43.64	150.04	0.16655
	0.1923	-340.91	67.14	0.78788			0.1923	-43.528	150.06	-1.4821
	0.1924	-341.19	67.25	0.4935			0.1924	-43.379	149.88	-0.95
	0.1925	-341.34	67.916	-2.8613			0.1925	-43.193	149.25	0.096779
	0.1926	-341.76	68.552	-2.7114			0.1926	-43.09	149.19	0.21811
	0.1927	-341.87	68.933	1.7448			0.1927	-43.021	149.4	0.39736
	0.1928	-342.02	69.499	3.681			0.1928	-42.878	149.2	1.8529
	0.1929	-342.35	70.079	9.278			0.1929	-42.592	148.83	-0.59887
	0.193	-342.3	70.522	14.027			0.193	-42.456	148.69	-2.6184
	0.1931	-341.87	70.905	10.869			0.1931	-42.845	148.82	-2.357
	0.1932	-341.7	71.408	7.5224			0.1932	-43.208	148.39	-2.5043
	0.1933	-341.65	71.881	3.4826			0.1933	-42.742	147.9	-1.7389
	0.1934	-341.74	72.318	-9.2334			0.1934	-42.105	148.06	1.4554
	0.1935	-341.89	72.918	-34.347			0.1935	-42.023	148.13	4.276
	0.1936	-341.6	73.469	-54.596			0.1936	-42.195	148.02	4.1928
	0.1937	-341.49	73.876	-46.328			0.1937	-42.519	148.06	1.8021
	0.1938	-341.68	74.398	-7.4274			0.1938	-42.758	148.06	-1.4345
	0.1939	-341.43	75.062	26.148			0.1939	-42.239	147.88	-4.9908
	0.194	-341.06	75.377	37.513			0.194	-41.778	147.7	-6.1066
	0.1941	-341.08	75.691	33.741			0.1941	-41.709	147.84	-2.3825
	0.1942	-341.51	76.293	19.903			0.1942	-41.899	147.78	4.7432
	0.1943	-341.55	76.615	8.3839			0.1943	-42.124	147.55	8.4891
	0.1944	-341.4	76.782	6.227			0.1944	-42.132	147.54	5.9838
	0.1945	-341.44	77.353	4.1445			0.1945	-41.979	147.66	1.4349
	0.1946	-341.63	77.699	-4.2836			0.1946	-41.996	147.63	-2.4406
	0.1947	-342.29	77.649	-11.558			0.1947	-42.261	147.62	-1.6364
	0.1948	-342.36	77.71	-10.339			0.1948	-42.283	147.72	-0.73502
	0.1949	-342.43	77.629	-6.0588			0.1949	-42.278	147.79	-3.0797
	0.195	-342.91	77.458	-2.7946			0.195	-42.26	148.11	-3.7923
	0.1951	-343.47	77.59	2.6888			0.1951	-42.017	148.16	-1.9397
	0.1952	-344.48	77.794	5.8427			0.1952	-42.208	148.23	0.072093
	0.1953	-345.32	77.959	2.9273			0.1953	-42.797	148.61	-0.72005
	0.1954	-346.01	77.743	-2.3113			0.1954	-42.859	148.81	-3.7259
	0.1955	-346.93	77.516	-4.494			0.1955	-42.319	149	-3.4359
	0.1956	-347.75	77.381	-4.1788			0.1956	-42.368	148.91	-0.45357
	0.1957	-348.71	76.993	-3.8118			0.1957	-42.96	149.05	1.6849
	0.1958	-349.63	77.244	-2.6352			0.1958	-43.498	149.71	2.3817
	0.1959	-350.45	77.41	-0.12562			0.1959	-43.701	150.12	2.5473
	0.196	-351.83	77.199	4.9655			0.196	-43.493	150.08	5.0588
	0.1961	-352.91	77.27	7.4032			0.1961	-43.148	149.99	4.8097
	0.1962	-353.81	77.061	3.5318			0.1962	-43.008	150.21	1.6612
	0.1963	-355	76.689	-3.9029			0.1963	-43.618	150.56	-0.67684
	0.1964	-356.14	76.587	-6.2441			0.1964	-44.124	150.88	-1.6232
	0.1965	-356.93	76.784	-2.4263			0.1965	-44.026	151.11	-3.4934
	0.1966	-357.42	76.95	-0.46633			0.1966	-43.698	151.32	-7.9234
	0.1967	-358.36	76.91	-2.4046			0.1967	-43.613	151.46	-5.6573
	0.1968	-359.81	76.952	-2.571			0.1968	-43.824	151.85	1.1812
	0.1969	-361.16	77.029	3.6628			0.1969	-44.046	152.31	2.6247
	0.197	-361.98	77.274	9.3126			0.197	-44.068	152.51	1.1712
	0.1971	-362.51	77.336	5.6208			0.1971	-44.135	152.61	2.9833
	0.1972	-363.42	77.425	-0.39426			0.1972	-44.403	152.92	4.65
	0.1973	-364.49	77.911	-1.4968			0.1973	-44.659	152.99	2.6161
	0.1974	-365.42	78.302	-2.577			0.1974	-44.113	152.97	0.55629
	0.1975	-366.42	78.254	-1.6731			0.1975	-43.991	153.3	-1.0804
	0.1976	-367	78.228	1.292			0.1976	-44.45	153.36	1.1703
	0.1977	-367.72	78.601	2.1391			0.1977	-44.405	153.32	3.9891
	0.1978	-368.3	78.962	-0.94061			0.1978	-44.287	153.12	1.6515
	0.1979	-368.09	79.161	-0.58696			0.1979	-44.327	152.96	-5.2358
	0.198	-368.75	79.216	1.3862			0.198	-44.225	153.02	-8.0411
	0.1981	-369.65	79.208	-2.9351			0.1981	-44.279	152.61	-4.7854
	0.1982	-369.75	79.318	-5.8864			0.1982	-44.485	151.97	-0.32352
	0.1983	-369.82	79.246	-0.43431			0.1983	-44.452	152.03	3.364
	0.1984	-369.99	79.146	3.8733			0.1984	-44.52	151.9	6.3303
	0.1985	-370.23	79.345	1.2195			0.1985	-44.637	151.3	3.7381
	0.1986	-370.57	79.444	-1.5737			0.1986	-44.668	151.03	-0.68445
	0.1987	-370.32	79.512	2.5084			0.1987	-44.798	150.57	-2.9931
	0.1988	-370.36	79.298	8.5786			0.1988	-44.959	149.97	-3.2587
	0.1989	-371	78.855	12.141			0.1989	-45.398	149.59	-0.4534
	0.199	-371.51	78.596	11.238			0.199	-45.45	148.96	0.74459
	0.1991	-371.6	78.402	10.995			0.1991	-44.976	148.53	0.17042
	0.1992	-371.36	78.275	8.7445			0.1992	-44.768	148.34	-0.097414
	0.1993	-371.36	78.062	-6.5903			0.1993	-44.797	148.08	0.36109
	0.1994	-371.17	77.853	-33.959			0.1994	-45.256	147.77	2.2691
	0.1995	-371.31	77.517	-53.452			0.1995	-45.617	147.33	2.9084
	0.1996	-371.34	76.836	-46.815			0.1996	-45.545	147.24	-3.0524
	0.1997	-371.27	76.415	-13.247			0.1997	-45.265	147.55	-5.9961
[truncated: 4,002 more rows]

## Sheet: fig 4F
	fig 4F
	direction	E-I offset (ms)	spike rate (Hz)
	0	8.7	167.928
	45	15.3	178.839
	90	34.6	157.93
	135	41.8	159.361
	180	4	186.762
	225	0	105.846
	270	0	91.9942
	315	0	65.2725
	vector sum - direction	101	100
	vector sum - DSI	0.73	0.17

## Sheet: fig 4G,H
	Fig 4G			Fig 4H
	Offset-DSI	Spiking-DSI		Offset-direction (degrees)	Spiking-direction (degrees)
	0.74	0.4703		155	159
	0.48	0.4806		282	270
	0.83	0.3561		105	113
	0.8	0.182235		213	230
	0.6	0.158255		219	242
	0.89	0.220163		20	41
	0.73	0.17		101	100
	0.71	0.273293		101	88
	0.774491	0.1906		90	135
	0.762803	0.3296		8	22
	0.153259	0.1521		175	146
