# Supplementary material for: Retinal direction selectivity in the absence of asymmetric starburst amacrine cell responses
Source: eLife journal article supplement (doi:10.7554/elife.42392), 2019-02-04
Supplement: supp [file elife-42392-supp-v1.zip › elife_poa_e42392_Figure_5_source_data_1.xlsx]

## Sheet: fig 5A
		Fig 5A (left)							Fig 5A (left)
			Control		HEX					Control		HEX
		time (s)	EPSC (pA)	IPSC (pA)	EPSC (pA)	IPSC (pA)			time (s)	EPSC (pA)	IPSC (pA)	EPSC (pA)	IPSC (pA)
		0	-4.1185	23.505	4.8521	25.802			0	-2.1348	54.699	11.562	123.5
		0.0001	-4.2338	24.284	4.4091	26.246			0.0001	-2.0787	54.671	11.907	123.31
		0.0002	-4.2205	24.516	3.3028	27.157			0.0002	-1.904	54.032	12.333	122.81
		0.0003	-4.7855	24.271	3.3364	28.337			0.0003	-1.9937	53.65	12.813	122.34
		0.0004	-5.7733	23.876	3.6456	29.452			0.0004	-2.2082	54.064	12.531	121.51
		0.0005	-5.6352	23.823	3.3358	30.557			0.0005	-1.9712	54.793	11.787	120.95
		0.0006	-4.85	24.147	3.6013	30.835			0.0006	-1.9362	55.029	11.634	120.6
		0.0007	-5.359	23.993	4.0563	31.368			0.0007	-1.8459	55.154	12.103	120.17
		0.0008	-5.9216	23.562	4.2553	32.335			0.0008	-1.866	55.726	11.898	118.39
		0.0009	-5.985	23.234	4.1531	33.326			0.0009	-2.1169	56.101	11.354	116.89
		0.001	-6.0228	23.139	3.9985	33.911			0.001	-2.487	56.996	12.069	115.92
		0.0011	-5.939	23.477	4.5789	34.517			0.0011	-3.1363	57.888	12.178	114.44
		0.0012	-6.0896	23.416	4.5053	35.734			0.0012	-2.6433	58.208	11.991	113.46
		0.0013	-5.7889	22.671	4.1885	36.265			0.0013	-2.2638	58.649	12.539	112.12
		0.0014	-5.8566	22.191	4.5725	36.404			0.0014	-2.8154	59.194	12.721	109.96
		0.0015	-6.1163	21.528	4.57	36.946			0.0015	-3.0956	60.053	12.439	108.306
		0.0016	-5.7538	21.287	4.4491	37.918			0.0016	-3.1336	60.424	12.085	106.892
		0.0017	-5.4652	21.073	4.4949	38.328			0.0017	-3.3534	60.149	11.88	105.367
		0.0018	-5.25	19.934	4.2241	38.391			0.0018	-3.1603	60.249	12.511	103.417
		0.0019	-5.6464	19.926	3.9292	38.685			0.0019	-2.7881	61.165	12.805	101.55
		0.002	-5.4031	19.708	4.2719	38.814			0.002	-3.294	61.258	13.528	100.363
		0.0021	-4.5173	18.904	4.9488	38.953			0.0021	-3.5195	60.583	13.603	98.939
		0.0022	-4.6134	18.763	4.883	39.132			0.0022	-3.2656	60.549	12.545	97.132
		0.0023	-4.7894	18.922	4.4616	39.085			0.0023	-3.6618	59.941	13.35	96.187
		0.0024	-4.3359	18.416	4.7409	38.987			0.0024	-3.388	59.385	14.08	95.871
		0.0025	-3.8155	17.532	4.8525	38.944			0.0025	-2.896	59.707	13.858	94.732
		0.0026	-3.2876	17.215	4.7366	39.117			0.0026	-2.7902	59.498	14.138	93.506
		0.0027	-3.4136	16.907	5.0263	39.229			0.0027	-3.0159	58.55	14.622	92.733
		0.0028	-3.5778	17.318	5.4984	39.311			0.0028	-3.435	57.4	15.037	92.699
		0.0029	-2.8267	17.383	5.6361	39.307			0.0029	-3.3817	56.724	15.557	92.695
		0.003	-2.0881	16.941	4.8037	38.915			0.003	-2.7493	56.528	15.727	92.441
		0.0031	-1.9447	17.104	4.9898	38.9			0.0031	-2.5983	55.7	15.844	91.726
		0.0032	-2.0451	16.807	5.6358	39.336			0.0032	-2.9629	54.738	15.418	91.028
		0.0033	-2.2622	16.423	5.4274	39.815			0.0033	-2.8068	54.053	15.511	91.01
		0.0034	-1.9828	16.755	5.1574	39.825			0.0034	-2.7814	53.358	16.563	91.285
		0.0035	-1.4315	17.032	5.4658	39.525			0.0035	-2.8476	53.149	16.63	91.259
		0.0036	-1.4275	16.978	5.6475	39.591			0.0036	-2.6163	53.08	16.344	91.041
		0.0037	-1.4975	16.698	5.7319	40.264			0.0037	-2.7407	52.161	16.601	91.142
		0.0038	-1.19	16.563	6.226	40.455			0.0038	-2.982	51.254	16.986	90.701
		0.0039	-1.2404	16.78	5.8652	40.575			0.0039	-2.4648	50.994	16.664	90.079
		0.004	-1.613	17.251	5.6211	41.257			0.004	-2.0368	51.02	16.701	90.224
		0.0041	-1.9559	16.912	6.0193	41.631			0.0041	-2.5132	50.777	16.722	90.498
		0.0042	-1.7956	16.47	6.2037	41.89			0.0042	-2.6906	50.506	16.259	90.209
		0.0043	-1.3745	16.72	6.1098	42.546			0.0043	-2.6562	50.615	16.2	89.556
		0.0044	-1.428	17.404	6.3491	43.096			0.0044	-2.8427	50.463	15.94	88.749
		0.0045	-1.8953	17.311	6.8552	43.526			0.0045	-2.5086	50.376	15.884	87.661
		0.0046	-2.0772	16.227	7.0686	44.203			0.0046	-2.5334	51.154	15.676	87.053
		0.0047	-1.7104	16.629	6.6508	45.029			0.0047	-3.3459	51.017	14.374	86.797
		0.0048	-2.0494	17.031	6.7221	45.747			0.0048	-3.8324	50.374	13.709	85.979
		0.0049	-2.6203	16.716	7.5362	46.392			0.0049	-3.8875	50.859	14.181	84.687
		0.005	-2.7754	16.543	7.9306	47.207			0.005	-3.5882	52.185	13.635	83.988
		0.0051	-2.558	16.616	7.7423	47.648			0.0051	-3.4012	52.753	13.492	83.308
		0.0052	-2.3304	16.837	7.656	48.402			0.0052	-4.1739	52.264	13.622	81.859
		0.0053	-2.4693	16.197	8.058	48.7			0.0053	-4.7466	51.627	12.718	81.026
		0.0054	-2.8203	15.474	8.57	49.078			0.0054	-5.0137	51.175	12.634	80.535
		0.0055	-2.9865	15.65	8.952	49.875			0.0055	-4.981	51.808	12.26	79.964
		0.0056	-3.2044	15.787	8.845	50.203			0.0056	-4.8945	52.06	12.23	79.443
		0.0057	-3.3471	15.139	8.445	50.446			0.0057	-4.8807	51.508	12.482	79.457
		0.0058	-3.0089	14.88	8.502	50.56			0.0058	-4.9298	51.242	12.067	79.036
		0.0059	-3.0315	14.583	9.081	50.066			0.0059	-5.2151	50.885	12.115	78.265
		0.006	-3.3328	14.274	9.107	49.6			0.006	-5.4557	50.197	12.167	78.014
		0.0061	-3.3338	14.591	9.383	49.528			0.0061	-5.9048	49.173	11.475	77.967
		0.0062	-3.2651	14.575	9.733	49.466			0.0062	-5.9962	48.406	11.088	78.527
		0.0063	-3.2215	14.562	9.322	49.454			0.0063	-5.7716	48.515	11.834	78.755
		0.0064	-3.4594	14.384	9.576	49.314			0.0064	-5.6857	48.155	12.361	78.692
		0.0065	-3.8172	13.861	9.699	48.507			0.0065	-6.0908	47.073	12.219	79.626
		0.0066	-3.8627	13.103	9.491	47.353			0.0066	-6.151	46.495	12.559	80.63
		0.0067	-3.5433	13.019	9.823	47.218			0.0067	-5.7033	46.555	13.031	81.312
		0.0068	-3.409	13.297	9.788	46.557			0.0068	-5.9576	46.123	13.131	82.558
		0.0069	-3.7565	13.162	9.556	45.975			0.0069	-6.3234	44.958	13.221	83.32
		0.007	-3.809	13.162	9.585	45.088			0.007	-5.9095	43.85	13.349	84.153
		0.0071	-3.7706	12.416	9.615	43.934			0.0071	-5.5371	43.709	14.287	85.282
		0.0072	-3.725	11.609	9.829	43.143			0.0072	-5.2132	44.137	14.511	86.392
		0.0073	-3.6583	11.764	9.694	41.622			0.0073	-5.029	43.842	13.956	87.635
		0.0074	-3.8641	11.741	9.105	40.547			0.0074	-5.4837	42.816	14.101	88.312
		0.0075	-3.9228	11.124	9.035	39.784			0.0075	-5.1983	42.294	14.661	89.383
		0.0076	-3.9481	10.916	8.981	39.142			0.0076	-4.9464	42.641	14.601	90.131
		0.0077	-4.1732	11.302	8.441	38.268			0.0077	-4.7972	42.835	14.368	90.396
		0.0078	-4.5991	11.575	8.029	36.782			0.0078	-4.4612	42.765	14.996	91.221
		0.0079	-4.8668	11.237	7.9684	36.251			0.0079	-4.413	42.807	15.252	91.661
		0.008	-4.8065	10.63	8.507	35.765			0.008	-4.5107	43.512	15.123	92.111
		0.0081	-4.8801	10.398	8.613	34.739			0.0081	-4.3661	43.959	15.329	92.634
		0.0082	-4.7724	10.202	7.7092	34.709			0.0082	-4.1443	43.997	15.125	92.56
		0.0083	-4.9146	9.9326	6.9094	34.549			0.0083	-4.2398	44.388	14.937	92.8
		0.0084	-5.0672	10.227	7.0654	33.718			0.0084	-4.0713	44.88	15.689	93.46
		0.0085	-5.1084	10.121	7.3485	33.174			0.0085	-3.7715	45.258	16.748	93.868
		0.0086	-5.6241	9.4359	8.091	33.452			0.0086	-3.5587	45.763	16.161	94.366
		0.0087	-5.5385	9.3003	8.479	33.373			0.0087	-3.4451	45.918	15.167	94.153
		0.0088	-5.1216	9.4797	8.031	32.622			0.0088	-3.3056	45.859	15.159	94.142
		0.0089	-5.2309	9.2409	8.146	32.089			0.0089	-3.1751	46.126	15.18	94.76
		0.009	-5.2846	8.9677	7.95	31.937			0.009	-3.243	46.526	15.051	94.551
		0.0091	-5.3927	8.9803	7.7597	32.416			0.0091	-3.3866	46.177	14.697	94.486
		0.0092	-5.6926	8.8578	8.064	32.23			0.0092	-3.4784	45.509	14.48	94.403
		0.0093	-5.6574	9.2302	8.39	31.782			0.0093	-3.2923	45.796	13.875	94.636
		0.0094	-5.6374	9.2039	8.467	32.034			0.0094	-3.0089	45.647	13.687	95.267
		0.0095	-5.9415	8.8569	8.261	32.379			0.0095	-2.7545	45.307	13.999	95.239
		0.0096	-5.988	8.6824	8.177	32.673			0.0096	-2.8812	45.181	13.822	95.486
		0.0097	-5.9919	8.461	8.753	32.339			0.0097	-3.5574	45.261	13.278	95.815
		0.0098	-6.1002	9.0332	8.878	32.297			0.0098	-3.8808	44.772	12.33	95.805
		0.0099	-5.9251	9.1947	8.514	32.917			0.0099	-3.6332	43.873	11.581	96.68
		0.01	-5.8975	8.7594	8.067	32.757			0.01	-3.2494	43.398	12.088	97.292
		0.0101	-5.9217	8.8857	8.128	32.795			0.0101	-3.2802	42.757	12.682	97.561
		0.0102	-5.8146	8.7065	9.056	33.129			0.0102	-3.7168	41.957	12.342	98.72
		0.0103	-6.0596	8.4166	9.868	33.22			0.0103	-3.9293	41.493	11.704	99.363
		0.0104	-6.181	8.5086	9.495	33.177			0.0104	-3.9179	41.706	10.393	100.009
		0.0105	-5.9434	8.3771	8.752	32.714			0.0105	-3.4595	40.626	9.994	101.016
		0.0106	-5.6868	8.4458	8.768	32.478			0.0106	-3.2761	39.206	10.325	101.661
		0.0107	-5.7395	8.8796	8.211	32.388			0.0107	-3.9022	39.024	10.413	102.287
		0.0108	-6.4106	8.9883	8.007	32.192			0.0108	-4.0207	38.334	10.419	102.685
		0.0109	-6.4296	8.2163	8.115	32.259			0.0109	-4.0021	37.328	9.763	102.93
		0.011	-5.7952	7.9163	8.435	32.236			0.011	-4.0047	36.984	9.345	102.827
		0.0111	-5.6251	8.3812	8.441	31.687			0.0111	-3.5965	36.756	9.408	103.049
		0.0112	-5.98	8.5985	7.5857	30.961			0.0112	-3.4739	36.482	9.244	103.343
		0.0113	-6.0895	8.102	6.8806	30.598			0.0113	-3.4168	36.351	8.855	103.157
		0.0114	-5.811	7.8469	6.453	30.726			0.0114	-3.6399	35.867	8.613	102.959
		0.0115	-5.5459	8.3941	6.5534	30.389			0.0115	-3.7324	35.352	8.399	102.444
		0.0116	-5.7884	7.6946	6.5454	29.781			0.0116	-3.3807	35.271	8.92	101.834
		0.0117	-5.9327	7.3016	5.9502	29.335			0.0117	-2.962	34.972	9.148	101.084
		0.0118	-5.3125	7.6799	5.5845	29.106			0.0118	-2.8376	34.752	8.987	100.326
		0.0119	-5.1323	7.4578	5.5612	28.873			0.0119	-3.3758	34.894	9.017	99.841
		0.012	-5.4356	6.8373	5.5458	28.246			0.012	-3.2469	34.589	8.988	98.442
		0.0121	-5.1605	6.6502	5.6506	27.803			0.0121	-2.7273	34.614	8.677	97.194
		0.0122	-4.9411	6.5181	5.7451	27.492			0.0122	-2.3876	34.266	8.587	96.638
		0.0123	-4.9123	6.4282	5.2787	27.169			0.0123	-2.2331	33.513	9.645	95.878
		0.0124	-4.3815	6.142	4.5448	27.219			0.0124	-2.7123	33.665	10.164	95.338
		0.0125	-4.1647	5.832	5.0089	26.707			0.0125	-3.0906	34.012	10.115	94.136
		0.0126	-4.085	6.455	5.7717	25.963			0.0126	-2.9526	34.241	9.97	93.238
		0.0127	-4.2929	6.0406	6.1012	25.986			0.0127	-2.8009	33.628	9.969	92.353
		0.0128	-4.3086	5.3552	5.9222	25.76			0.0128	-2.5901	32.943	10.127	91.316
		0.0129	-3.737	5.4745	5.4511	25.55			0.0129	-2.5093	32.844	10.124	91.64
		0.013	-3.7846	5.7985	5.3789	25.626			0.013	-2.8614	33.097	10.583	91.509
		0.0131	-3.8286	5.422	6.1552	25.287			0.0131	-3.4057	33.285	11.598	90.698
		0.0132	-3.4588	5.1453	6.7324	24.794			0.0132	-3.5819	32.625	12.002	90.556
		0.0133	-3.2165	5.0345	7.2623	24.401			0.0133	-3.5759	32.44	11.63	90.912
		0.0134	-3.2382	4.8954	7.1106	24.031			0.0134	-3.2462	32.427	11.858	91.085
		0.0135	-3.2149	5.1655	6.2891	24.156			0.0135	-3.5403	32.083	12.412	91.057
		0.0136	-3.1809	5.1557	7.0387	24.296			0.0136	-4.274	32.104	13.014	92.055
		0.0137	-3.2211	5.0224	8.637	24.052			0.0137	-4.5667	31.823	13.208	93.244
		0.0138	-2.5812	4.7293	9.529	23.408			0.0138	-4.3204	31.405	13.045	93.71
		0.0139	-2.4634	4.3528	9.55	22.905			0.0139	-3.9156	31.456	13.057	94.357
		0.014	-2.6472	4.0882	9.659	23.081			0.014	-4.4781	31.137	13.515	95.617
		0.0141	-2.7411	4.3946	10.404	23.343			0.0141	-5.159	30.871	14.295	97.07
		0.0142	-2.6587	5.0196	10.672	23.04			0.0142	-5.2886	31.309	14.005	98.136
		0.0143	-2.2821	4.5344	10.907	22.704			0.0143	-4.9774	31.414	13.354	99.139
		0.0144	-2.3676	4.4552	11.536	22.647			0.0144	-4.9752	31.185	12.803	100.285
		0.0145	-2.91	4.3913	11.605	22.265			0.0145	-5.4398	31.307	13.039	101.145
		0.0146	-3.1191	4.1654	11.496	21.937			0.0146	-5.5803	31.667	13.475	102.212
		0.0147	-2.4547	4.0641	11.457	21.872			0.0147	-5.4515	31.523	13.444	103.012
		0.0148	-2.8516	3.9144	12.072	21.927			0.0148	-5.4845	31.487	13.151	103.33
		0.0149	-3.4432	4.759	12.333	21.81			0.0149	-5.3497	31.742	12.743	103.776
		0.015	-3.3532	5.1206	11.687	21.634			0.015	-5.3465	31.953	13.147	104.173
		0.0151	-3.2394	5.1992	11.042	21.296			0.0151	-5.5844	32.423	13.31	104.385
		0.0152	-3.2439	5.5413	10.822	21.051			0.0152	-5.612	33.031	13.029	104.183
		0.0153	-3.8019	6.0659	10.968	21.183			0.0153	-5.3227	33.01	12.843	103.974
		0.0154	-4.0272	6.6086	11.401	21.1			0.0154	-5.1407	32.846	12.649	103.604
		0.0155	-3.7339	7.1546	11.263	21.025			0.0155	-5.31	33.474	12.354	102.937
		0.0156	-3.6922	7.5973	10.797	21.501			0.0156	-5.2675	33.72	12.112	101.901
		0.0157	-3.8625	8.3607	10.631	21.478			0.0157	-5.1676	33.323	12.359	100.943
		0.0158	-4.0481	9.5245	9.696	21.632			0.0158	-4.8934	33.915	12.731	99.79
		0.0159	-4.0898	10.324	9.708	21.761			0.0159	-4.9396	34.762	12.594	98.583
		0.016	-4.3894	10.983	10.102	21.769			0.016	-5.1771	34.655	12.64	97.317
		0.0161	-4.9192	11.648	9.595	22.13			0.0161	-4.7284	34.437	12.632	96.038
		0.0162	-4.769	12.625	8.743	22.104			0.0162	-4.1204	34.558	12.13	94.765
		0.0163	-4.6198	14.162	8.009	21.934			0.0163	-4.5444	35.151	12.323	92.834
		0.0164	-4.9199	15.264	8.141	22.198			0.0164	-4.8274	35.844	12.88	91.296
		0.0165	-4.9758	15.722	7.7913	22.754			0.0165	-4.3878	36.747	13.242	89.331
		0.0166	-5.2665	16.623	7.8064	23.265			0.0166	-4.1083	37.244	13.514	87.495
		0.0167	-5.8692	17.814	7.5105	23.153			0.0167	-3.61	37.376	13.767	86.632
		0.0168	-5.6479	19.01	6.7683	22.728			0.0168	-3.5389	38.057	14.332	85.106
		0.0169	-5.3614	20.103	7.0896	22.965			0.0169	-3.838	38.658	14.34	83.239
		0.017	-5.4899	21.107	7.0952	22.948			0.017	-3.7899	39.804	13.872	81.871
		0.0171	-5.615	22.077	6.9977	23.615			0.0171	-3.9982	41.33	14.334	80.158
		0.0172	-5.8056	22.574	7.1427	24.042			0.0172	-4.0108	41.86	15.08	78.582
		0.0173	-5.9014	23.291	6.7789	23.332			0.0173	-3.5135	42.361	14.713	78.002
		0.0174	-5.8578	24.176	6.9845	23.402			0.0174	-3.6246	43.625	15.014	77.293
		0.0175	-5.7716	24.654	7.9534	23.75			0.0175	-4.0289	44.734	15.411	76.113
		0.0176	-5.6072	25.298	8.099	24.16			0.0176	-4.2562	45.484	15.151	75.156
		0.0177	-5.7323	25.766	7.8435	24.339			0.0177	-4.0947	46.405	15.235	74.11
		0.0178	-5.7193	25.85	8.229	23.54			0.0178	-4.0236	47.596	15.515	73.632
		0.0179	-5.5325	25.638	8.586	22.971			0.0179	-4.233	49.083	15.531	74.048
		0.018	-6.1119	26.217	8.393	23.207			0.018	-4.4645	50.656	15.281	73.913
		0.0181	-6.4384	26.702	8.625	23.635			0.0181	-4.6247	51.567	15.474	73.921
		0.0182	-6.1968	26.407	9.142	23.107			0.0182	-4.4043	52.793	15.449	74.33
		0.0183	-6.1802	26.453	9.347	22.619			0.0183	-3.8948	54.127	15.04	74.765
		0.0184	-5.6778	26.189	9.446	22.455			0.0184	-4.0141	55.099	15.198	75.497
		0.0185	-5.5355	25.756	9.504	21.8			0.0185	-4.5504	56.239	15.203	76.084
		0.0186	-5.9943	25.688	9.851	21.391			0.0186	-4.7907	57.248	15.119	76.399
		0.0187	-6.0843	26.067	10.355	21.264			0.0187	-4.6467	58.071	14.801	77.172
		0.0188	-5.9405	25.889	10.393	20.996			0.0188	-4.3006	58.385	14.351	78.378
		0.0189	-5.7878	24.749	10.433	20.545			0.0189	-4.2574	58.982	14.796	79.155
		0.019	-5.7575	24.337	10.327	19.96			0.019	-4.3636	59.338	14.626	79.895
		0.0191	-5.4992	25.014	9.959	19.661			0.0191	-4.469	59.437	14.09	80.721
		0.0192	-5.269	25.422	10.628	19.665			0.0192	-4.484	59.572	13.754	81.106
		0.0193	-5.4558	24.695	11.307	19.444			0.0193	-4.2371	59.29	13.408	81.642
		0.0194	-5.5103	23.893	10.597	19.453			0.0194	-4.047	59.271	13.622	82.351
		0.0195	-5.6109	23.861	9.864	19.435			0.0195	-3.855	59.182	14.106	83.214
		0.0196	-5.4136	23.536	10.63	19.405			0.0196	-3.9585	58.649	13.813	84.155
		0.0197	-5.0735	23.606	10.938	19.457			0.0197	-3.9717	58.36	13.214	84.896
		0.0198	-5.3384	24.22	9.957	19.16			0.0198	-3.4235	57.719	13.026	85.263
		0.0199	-5.311	24.445	9.866	19.094			0.0199	-3.0951	56.98	12.866	85.477
		0.02	-5.2485	24.184	9.548	19.776			0.02	-3.1656	56.271	12.664	86.137
		0.0201	-5.1939	24.229	9.03	20.36			0.0201	-3.5035	55.443	12.915	86.932
		0.0202	-5.1424	24.986	9.63	20.094			0.0202	-3.6168	54.94	13.297	87.356
		0.0203	-5.3413	25.564	9.646	19.946			0.0203	-3.6586	53.854	13.146	87.446
		0.0204	-5.1472	25.572	9.014	20.538			0.0204	-3.3	52.716	12.477	87.756
		0.0205	-4.6403	25.606	8.746	21.316			0.0205	-3.1099	51.92	12.474	88.34
		0.0206	-4.8502	26.403	8.312	22.025			0.0206	-3.5577	51.414	13.11	88.554
		0.0207	-5.054	27.433	8.06	22.606			0.0207	-3.691	50.791	13.361	88.603
		0.0208	-4.9385	27.874	8.414	22.604			0.0208	-4.0285	49.368	12.958	88.615
		0.0209	-4.6904	28.462	8.243	22.736			0.0209	-4.0554	48.451	12.531	88.854
		0.021	-4.1551	29.161	7.7755	23.466			0.021	-3.7775	48.177	12.936	88.773
		0.0211	-4.0517	29.418	7.4137	24.582			0.0211	-3.7528	47.472	13.304	88.308
		0.0212	-4.2574	29.969	7.1569	25.405			0.0212	-3.8364	46.96	13.731	88.959
		0.0213	-4.3281	30.73	7.0481	25.247			0.0213	-4.3134	46.683	13.393	89.776
		0.0214	-4.2027	31.679	6.8673	25.573			0.0214	-4.7361	46.057	12.293	89.84
		0.0215	-4.4465	31.965	6.7314	26.566			0.0215	-4.6918	45.874	12.615	89.638
		0.0216	-4.3963	32.12	6.9218	26.933			0.0216	-4.4023	46.216	13.322	89.722
		0.0217	-3.8478	33.065	6.4045	27.179			0.0217	-4.4258	46.296	13.477	89.559
		0.0218	-3.956	33.299	5.8442	27.365			0.0218	-4.9099	45.746	13.549	89.532
		0.0219	-4.0039	33.724	6.075	27.51			0.0219	-5.1552	46.023	13.241	89.829
		0.022	-3.9693	34.876	6.2399	27.732			0.022	-5.0688	46.698	13.06	89.916
		0.0221	-4.1318	35.27	6.1241	28.434			0.0221	-4.8482	46.454	13.106	89.618
		0.0222	-3.7366	34.894	5.7997	29.039			0.0222	-4.2916	46.346	12.905	89.229
		0.0223	-3.6046	34.886	5.9516	28.551			0.0223	-4.4572	46.635	12.877	89.342
		0.0224	-3.8917	35.811	6.1158	27.958			0.0224	-4.7407	47.477	13.044	89.838
		0.0225	-3.7908	37.24	5.9809	28.018			0.0225	-4.7652	47.5	13.505	89.429
		0.0226	-3.8667	37.558	5.939	28.451			0.0226	-4.788	46.962	13.452	88.416
		0.0227	-3.8346	36.436	5.9172	28.501			0.0227	-4.0106	46.778	12.669	87.931
		0.0228	-3.8452	36.859	6.0492	27.842			0.0228	-3.8795	46.363	12.103	87.727
		0.0229	-3.7562	38.015	6.3371	27.202			0.0229	-4.2443	46.269	12.57	87.73
		0.023	-3.9641	38.26	6.0227	27.1			0.023	-4.0175	46.467	12.986	87.292
		0.0231	-4.3835	38.519	5.9725	27.622			0.0231	-3.5984	46.415	12.216	86.5
		0.0232	-4.3099	38.669	6.4271	27.749			0.0232	-3.7631	45.72	11.943	85.583
		0.0233	-4.4575	39.037	6.9362	26.73			0.0233	-4.0328	45.113	12.313	85.393
		0.0234	-4.5427	38.943	6.9506	25.753			0.0234	-3.7464	44.765	12.343	84.854
		0.0235	-4.5684	38.801	7.0082	25.91			0.0235	-3.8275	44.558	12.041	83.461
		0.0236	-4.2115	39.151	8.106	25.876			0.0236	-3.4174	44.253	11.606	82.776
		0.0237	-4.385	39.655	8.402	25.547			0.0237	-2.6826	44.069	11.245	82.478
		0.0238	-4.5479	39.833	7.885	25.933			0.0238	-2.8521	43.943	11.355	81.924
		0.0239	-4.4459	39.727	8.033	25.62			0.0239	-2.6998	43.152	12.106	81.019
		0.024	-4.628	39.873	9.632	24.945			0.024	-2.5459	42.515	12.605	80.296
		0.0241	-4.3598	40.099	10.426	24.227			0.0241	-2.7012	42.34	11.873	79.364
		0.0242	-4.672	40.236	9.667	23.816			0.0242	-2.488	41.998	11.373	78.39
		0.0243	-4.6177	40.019	9.66	23.923			0.0243	-2.4096	41.655	11.112	77.888
		0.0244	-4.3537	39.971	10.067	23.954			0.0244	-2.2439	41.819	10.981	77.256
		0.0245	-4.8367	40.041	10.765	23.894			0.0245	-2.6462	41.845	11.428	76.275
		0.0246	-4.8346	39.697	11.311	23.439			0.0246	-2.9256	41.114	11.367	75.658
		0.0247	-4.83	39.352	10.846	22.729			0.0247	-2.6419	40.647	11.419	74.947
		0.0248	-5.2359	39.449	10.7	23.018			0.0248	-2.8795	40.82	11.084	74.318
		0.0249	-4.9095	38.534	11.007	23.562			0.0249	-3.4913	41.079	10.492	73.691
		0.025	-4.0036	37.194	11.04	23.012			0.025	-3.3442	41.627	10.896	72.828
		0.0251	-4.1085	37.273	11.176	22.201			0.0251	-2.9577	41.714	10.961	72.424
		0.0252	-4.5794	37.731	11.535	21.81			0.0252	-3.533	41.455	10.136	71.84
		0.0253	-4.2465	37.412	11.667	22.225			0.0253	-3.9203	41.896	10.393	71.377
		0.0254	-3.9877	36.609	11.147	22.402			0.0254	-3.7117	42.159	10.695	70.993
		0.0255	-4.0204	35.404	10.91	22.252			0.0255	-3.5982	42.395	10.353	70.037
		0.0256	-4.1515	33.838	11.008	22.296			0.0256	-3.7165	43.116	10.111	69.868
		0.0257	-4.1091	33.2	10.476	21.606			0.0257	-4.2901	43.25	10.109	70.139
		0.0258	-3.826	33.28	10.263	20.8			0.0258	-4.2334	43.435	10.421	69.39
		0.0259	-3.7101	33.608	9.836	20.771			0.0259	-3.6932	43.833	9.803	69.33
		0.026	-3.8354	33.525	9.014	20.857			0.026	-3.9572	43.845	8.855	69.482
		0.0261	-4.1455	32.139	9.056	20.522			0.0261	-4.0522	43.946	9.174	68.913
		0.0262	-4.3571	30.396	9.083	19.935			0.0262	-4.1209	44.353	10.115	68.603
		0.0263	-4.3149	29.778	8.581	19.761			0.0263	-4.2958	44.549	9.588	68.483
		0.0264	-4.1493	30.379	8.407	20.097			0.0264	-4.4203	44.308	8.837	68.604
		0.0265	-3.8185	30.101	8.086	20.052			0.0265	-4.0237	44.441	8.883	68.615
		0.0266	-3.6069	28.941	7.705	19.551			0.0266	-3.7062	44.602	8.924	67.831
		0.0267	-3.5891	28.537	8.021	19.084			0.0267	-3.6991	44.502	9.227	67.393
		0.0268	-3.868	28.459	7.5804	18.6972			0.0268	-3.7204	44.258	9.17	67.189
		0.0269	-4.1136	29.096	7.328	18.5273			0.0269	-3.5785	44.028	9.301	66.95
		0.027	-4.1081	29.395	7.7416	18.8335			0.027	-2.914	44.178	9.403	66.748
		0.0271	-4.0026	28.247	7.6759	18.599			0.0271	-2.9187	43.867	9.369	65.706
		0.0272	-3.8344	27.573	7.5014	18.6636			0.0272	-2.9613	43.417	9.543	65.249
		0.0273	-3.6892	27.744	7.8898	18.8336			0.0273	-2.6565	42.803	9.652	65.303
		0.0274	-4.0661	28.458	8.494	18.3681			0.0274	-2.7286	41.971	10.211	64.805
		0.0275	-4.226	28.938	8.543	17.9675			0.0275	-2.7778	41.694	9.987	64.265
		0.0276	-4.0086	28.708	8.285	17.7883			0.0276	-2.848	41.753	9.732	63.508
		0.0277	-3.7595	29.066	8.352	18.0885			0.0277	-2.4747	40.907	9.864	63.41
		0.0278	-3.9042	29.3	8.759	18.2735			0.0278	-1.8382	39.433	10.032	63.072
		0.0279	-4.0706	29.217	8.512	18.1674			0.0279	-1.9858	39.053	10.706	62.302
		0.028	-3.5216	30.138	8.734	17.6667			0.028	-2.4223	38.926	10.968	61.635
		0.0281	-3.4134	31.31	9.492	17.5671			0.0281	-2.7623	37.869	10.375	60.821
		0.0282	-3.4288	31.734	9.547	18.3297			0.0282	-2.5116	37.008	10.334	60.557
		0.0283	-3.5236	31.761	9.949	18.4203			0.0283	-2.0883	36.735	10.912	60.389
		0.0284	-2.95	32.059	10.561	17.8619			0.0284	-2.0153	36.558	11.541	59.306
		0.0285	-2.9555	32.785	10.555	17.7897			0.0285	-2.1492	36.315	11.767	58.354
		0.0286	-3.4988	34.239	10.134	18.1134			0.0286	-2.1311	35.812	11.164	58.261
		0.0287	-3.6088	34.98	9.545	18.6176			0.0287	-1.8918	35.311	11.476	57.607
		0.0288	-3.6228	35.173	9.721	18.7607			0.0288	-2.2296	35.218	11.808	56.854
		0.0289	-3.1774	35.839	10.446	18.2852			0.0289	-2.6495	35.118	11.804	56.469
		0.029	-2.7442	36.299	10.751	18.2125			0.029	-2.8927	34.832	12.081	56.118
		0.0291	-2.7825	37.006	10.271	18.2313			0.0291	-3.071	34.876	12.027	55.58
		0.0292	-3.4379	37.416	10.118	18.6666			0.0292	-2.8237	34.951	12.095	54.671
		0.0293	-3.3257	37.756	10.17	19.113			0.0293	-2.2597	34.969	12.048	54.205
		0.0294	-2.8198	38.525	10.027	19.108			0.0294	-2.5165	35.4	11.851	54.263
		0.0295	-2.8374	38.943	9.489	18.8016			0.0295	-3.1414	36.538	11.773	53.756
		0.0296	-2.6847	39.839	8.861	18.0693			0.0296	-3.1229	38.248	11.862	53.333
		0.0297	-2.6184	40.248	8.96	18.0418			0.0297	-3.1839	39.868	11.94	52.578
		0.0298	-2.6577	40.349	9.202	18.2998			0.0298	-3.1962	41.877	11.569	51.544
		0.0299	-2.7295	41.049	9.342	18.5217			0.0299	-2.6368	44.569	11.634	51.383
		0.03	-2.7552	41.179	8.822	18.5835			0.03	-2.2901	47.21	11.941	50.691
		0.0301	-2.8983	41.582	8.313	18.1245			0.0301	-2.5022	49.786	11.364	50.114
		0.0302	-3.1425	42.204	8.331	17.6049			0.0302	-2.6629	52.964	11.007	50.007
		0.0303	-3.1113	42.645	7.8799	17.8568			0.0303	-2.1732	56.703	11.272	49.904
		0.0304	-2.8842	42.443	7.5237	18.0775			0.0304	-1.955	60.147	11.09	50.476
		0.0305	-2.6644	42.212	7.2726	17.5538			0.0305	-2.3006	64.139	11.588	50.649
		0.0306	-2.4035	42.492	7.2737	17.5336			0.0306	-2.3804	68.383	12.055	51.009
		0.0307	-2.54	42.38	7.5719	17.7536			0.0307	-2.0112	71.66	11.393	51.906
		0.0308	-3.0207	42.226	6.7715	17.7784			0.0308	-1.758	75.018	10.728	52.413
		0.0309	-3.0812	42.492	6.0757	17.7726			0.0309	-1.8592	79.71	11.021	52.914
		0.031	-2.8245	42.812	6.256	16.9932			0.031	-1.872	83.921	11.821	53.69
		0.0311	-2.2021	42.505	6.5645	16.8789			0.0311	-1.5992	87.665	11.06	55.473
		0.0312	-2.0321	41.643	6.2925	17.6308			0.0312	-1.3934	92.031	10.345	56.948
		0.0313	-2.7273	41.321	6.1214	17.1685			0.0313	-1.5183	96.332	11.559	58.021
		0.0314	-3.0253	41.37	6.3025	16.816			0.0314	-1.2143	100.52	12.541	59.423
		0.0315	-2.6577	41.659	6.2913	17.0335			0.0315	-0.91774	104.35	12.486	60.479
		0.0316	-2.6647	42.015	6.3599	17.2232			0.0316	-0.66001	107.71	12.015	61.931
		0.0317	-2.8872	41.165	6.4022	17.3626			0.0317	-0.92763	111.19	11.273	63.439
		0.0318	-3.1034	40.651	6.3962	16.8197			0.0318	-0.91592	114.39	11.201	64.784
		0.0319	-3.1159	40.681	6.4144	16.7799			0.0319	-0.60282	117.01	11.84	66.518
		0.032	-2.7746	40.743	6.4123	17.5082			0.032	-0.50866	119.27	12.434	68.759
		0.0321	-2.7616	40.709	6.3512	17.7646			0.0321	-0.61356	120.54	12.528	70.337
		0.0322	-2.9982	40.082	6.9285	17.8619			0.0322	-1.064	121.28	12.78	71.395
		0.0323	-2.9198	39.291	7.1258	17.2677			0.0323	-1.1948	122.09	13.045	73.443
		0.0324	-2.6853	38.912	6.4222	16.9138			0.0324	-0.96962	122.8	13.047	75.102
		0.0325	-2.3964	39.106	5.8725	17.7612			0.0325	-1.1776	122.66	12.738	76.154
		0.0326	-2.5112	38.922	6.2107	18.1232			0.0326	-1.5528	121.92	12.562	77.819
		0.0327	-2.2712	38.848	6.7404	17.8495			0.0327	-1.8127	121.24	12.899	78.713
		0.0328	-2.1866	38.525	6.442	17.7407			0.0328	-2.2551	120.15	13.042	79.339
		0.0329	-2.4872	37.905	6.2702	17.3986			0.0329	-2.4682	118.46	13.216	79.9
		0.033	-2.4469	37.759	6.358	16.9544			0.033	-2.4813	116.64	13.284	80.352
		0.0331	-2.3584	38.14	6.0962	17.1404			0.0331	-2.3974	114.78	13.272	80.997
		0.0332	-1.929	38.67	5.8613	17.2845			0.0332	-2.3558	112.71	13.371	80.783
		0.0333	-1.9974	38.664	6.2518	17.3698			0.0333	-2.3583	110.11	13.194	80.211
		0.0334	-2.172	38.512	6.3791	17.0117			0.0334	-3.0831	107.26	12.765	80.527
		0.0335	-2.136	38.957	5.4984	16.4052			0.0335	-3.897	104.87	12.537	80.77
		0.0336	-2.382	40.232	5.1095	16.412			0.0336	-3.8118	102.34	12.459	80.029
		0.0337	-2.382	41.227	5.7182	16.8937			0.0337	-3.069	99.3	12.66	79.268
		0.0338	-1.9035	41.6	6.2538	16.8987			0.0338	-3.2637	96.409	13.042	78.218
		0.0339	-2.08	41.626	6.4856	16.5414			0.0339	-4.3211	93.812	12.792	77.51
		0.034	-2.5538	42.518	6.4298	16.0166			0.034	-4.6139	91.58	12.456	77.125
		0.0341	-2.3634	44.432	6.2093	15.5192			0.0341	-4.6663	89.225	12.511	75.996
		0.0342	-2.4561	45.209	5.7023	15.2797			0.0342	-5.0075	86.882	12.465	75.03
		0.0343	-2.6652	45.735	5.8596	15.3642			0.0343	-5.2949	84.866	12.086	73.802
		0.0344	-2.7765	46.716	6.7562	15.6956			0.0344	-5.3098	83.222	12.006	72.687
		0.0345	-2.7013	47.537	6.7437	15.4982			0.0345	-5.1296	82.285	12.249	71.39
		0.0346	-2.963	48.694	6.0024	14.4904			0.0346	-5.257	81.215	11.915	69.998
		0.0347	-3.5173	49.842	6.1628	13.9317			0.0347	-5.1214	80.088	11.843	68.938
		0.0348	-3.5739	50.664	7.1099	14.0617			0.0348	-5.192	79.723	11.935	67.836
		0.0349	-3.6995	51.493	7.5892	13.8232			0.0349	-5.8415	80.013	12.178	67.299
		0.035	-3.7464	52.25	7.3975	13.7782			0.035	-5.8713	80.351	12.085	66.148
		0.0351	-4.0823	52.987	7.1263	13.3712			0.0351	-5.2976	80.619	11.523	64.965
		0.0352	-4.5471	54.286	6.6252	13.0521			0.0352	-5.1373	81.194	11.462	64.065
		0.0353	-4.5715	55.216	6.7203	13.0133			0.0353	-5.2643	81.808	11.743	63.114
		0.0354	-4.3054	55.499	7.8083	13.2945			0.0354	-5.5331	82.892	11.916	62.535
		0.0355	-4.5625	56.405	7.9748	13.3101			0.0355	-5.649	83.756	11.681	61.909
		0.0356	-5.0667	56.911	7.9248	12.5571			0.0356	-5.7151	84.111	11.745	61.322
		0.0357	-4.9806	56.944	7.8395	12.1035			0.0357	-5.852	85.42	12.017	60.861
		0.0358	-5.2544	56.793	7.1148	12.1286			0.0358	-5.5065	86.695	12.116	60.286
		0.0359	-5.4358	57.032	7.1818	12.4254			0.0359	-5.4486	87.319	11.686	60.215
		0.036	-4.9035	57.657	7.4913	12.2278			0.036	-5.6483	87.78	11.66	60.133
		0.0361	-4.8476	56.9	7.1507	11.8499			0.0361	-5.8895	88.181	12.247	59.409
		0.0362	-5.183	56.393	7.0488	11.9738			0.0362	-5.7856	88.611	11.92	59.137
		0.0363	-5.0844	56.57	6.9865	12.4622			0.0363	-5.639	89.099	11.566	59.085
		0.0364	-5.1909	56.002	6.7613	12.6126			0.0364	-5.6029	88.685	11.62	59.024
		0.0365	-5.6488	55.254	6.7595	12.0341			0.0365	-5.4736	88.107	11.8	58.952
		0.0366	-5.5619	54.956	6.5329	11.7628			0.0366	-5.2794	88.212	12.063	58.792
		0.0367	-5.3426	54.598	5.831	12.0011			0.0367	-5.1468	87.791	12.107	58.593
		0.0368	-5.057	53.456	5.6147	12.0373			0.0368	-4.9463	87.079	12.182	58.583
		0.0369	-5.0006	52.949	5.9926	12.0261			0.0369	-5.0582	85.882	11.977	58.363
		0.037	-5.3724	53.11	6.5716	11.6873			0.037	-5.1817	84.452	11.702	57.587
		0.0371	-5.4528	52.642	6.385	12.0695			0.0371	-5.1401	83.026	11.505	57.301
		0.0372	-5.2726	52.259	5.5182	12.4895			0.0372	-5.3496	81.226	11.724	57.641
		0.0373	-5.2847	51.79	4.7626	11.877			0.0373	-5.1689	80.047	11.719	57.802
		0.0374	-5.2882	51.039	4.8137	11.4825			0.0374	-5.0369	78.61	11.352	58.233
		0.0375	-4.8774	50.512	5.4591	11.4473			0.0375	-5.2047	76.616	11.639	59.172
		0.0376	-4.6702	50.802	5.2972	11.4885			0.0376	-5.2747	75.414	11.679	59.392
		0.0377	-4.7618	50.602	4.7804	11.2765			0.0377	-5.2644	74.022	11.844	59.635
		0.0378	-4.8232	49.876	4.7385	11.1312			0.0378	-5.5874	72.061	12.083	60.203
		0.0379	-4.8455	49.669	5.2321	11.4834			0.0379	-5.4896	70.598	11.84	61.045
		0.038	-4.7988	49.613	5.2524	11.951			0.038	-5.2354	70.024	11.125	62.147
		0.0381	-4.7358	49.701	5.0148	12.2035			0.0381	-5.1409	69.036	11.047	63.255
		0.0382	-4.7366	49.322	5.1603	12.0584			0.0382	-5.382	67.194	11.61	64.039
		0.0383	-5.0448	48.829	4.8014	12.0293			0.0383	-5.4522	66.357	11.874	65.15
		0.0384	-5.3562	48.747	5.0197	11.6585			0.0384	-4.8982	65.971	12.097	66.595
		0.0385	-5.4553	49.159	5.5641	11.7121			0.0385	-5.287	65.161	11.749	67.72
		0.0386	-5.8305	49.199	5.6696	12.3567			0.0386	-5.5307	64.941	11.493	68.984
		0.0387	-6.039	49.026	5.7682	12.9792			0.0387	-5.0366	65.049	11.186	70.033
		0.0388	-5.6108	48.967	5.9486	13.6673			0.0388	-4.9759	64.346	11.747	71.241
		0.0389	-5.8972	48.415	6.1719	13.6748			0.0389	-5.1857	63.658	12.394	72.989
		0.039	-6.1759	48.12	5.3991	12.99			0.039	-5.8503	63.885	11.996	74.854
		0.0391	-6.3232	48.503	5.6405	13.0467			0.0391	-6.2262	64.215	12.01	76.713
		0.0392	-6.7774	48.6	6.181	14.3431			0.0392	-5.6549	64.139	12.03	78.057
		0.0393	-6.3132	48.262	6.3726	15.0462			0.0393	-5.2291	64.241	12.109	79.458
		0.0394	-6.1269	47.781	7.1582	15.2024			0.0394	-5.7585	64.154	12.746	80.886
		0.0395	-6.5828	47.097	6.7144	15.1671			0.0395	-5.8546	64.307	13.134	81.543
		0.0396	-6.8251	46.429	6.2952	15.4787			0.0396	-5.5461	64.675	13.121	82.724
		0.0397	-6.9277	46.199	7.0642	16.4388			0.0397	-5.6355	64.873	13.101	84.214
		0.0398	-6.7082	45.822	7.2643	17.1433			0.0398	-5.5294	64.597	12.759	85.045
		0.0399	-6.6272	44.897	6.7993	17.5177			0.0399	-5.2816	64.165	13.24	84.645
		0.04	-7.0826	44.377	6.8752	17.6353			0.04	-5.2267	64.385	14.164	84.622
		0.0401	-6.9214	43.314	7.4398	17.8945			0.0401	-5.2653	64.57	13.977	85.504
		0.0402	-6.852	42.356	7.1082	18.6704			0.0402	-4.9724	63.933	13.43	85.617
		0.0403	-6.8632	41.973	6.3309	18.8717			0.0403	-4.9487	62.864	13.77	85.375
		0.0404	-6.8108	41.024	6.3068	18.7441			0.0404	-4.9711	62.218	14.021	84.757
		0.0405	-7.0509	40.057	6.1621	19.23			0.0405	-5.0855	61.655	14.184	83.923
		0.0406	-6.6624	39.141	5.8321	19.308			0.0406	-5.3465	61.182	14.672	83.944
		0.0407	-6.0508	38.287	6.027	18.9648			0.0407	-5.4772	60.111	15.322	83.396
		0.0408	-5.8864	37.469	5.4904	19.154			0.0408	-5.2805	58.522	15.609	82.328
		0.0409	-5.8758	36.446	4.6442	19.199			0.0409	-4.6154	57.379	14.707	82.421
		0.041	-5.8783	35.978	4.7243	19.314			0.041	-4.2687	56.162	14.567	82.108
		0.0411	-5.908	35.205	4.9728	19.605			0.0411	-4.8826	54.621	15.093	81.114
		0.0412	-5.482	33.745	5.0023	19.372			0.0412	-4.9647	53.491	14.833	80.512
		0.0413	-4.9829	32.944	4.7171	18.9224			0.0413	-4.4913	53.065	14.86	79.891
		0.0414	-5.1613	32.884	4.997	19.134			0.0414	-4.4919	52.048	15.382	79.462
		0.0415	-5.3392	32.672	4.7479	19.122			0.0415	-4.5899	50.411	14.967	78.989
		0.0416	-5.0258	31.501	4.2538	18.9881			0.0416	-4.4082	50.046	14.271	79.005
		0.0417	-4.9983	30.563	4.1535	19.261			0.0417	-4.2126	50.116	14.852	79.173
		0.0418	-5.0842	29.94	3.9694	18.4344			0.0418	-4.0225	50.213	14.66	79.039
		0.0419	-5.0408	29.556	4.4328	18.0708			0.0419	-3.6248	50.445	14.062	79.171
		0.042	-5.3215	29.263	4.7014	18.0702			0.042	-3.9614	50.178	14.927	79.278
		0.0421	-5.3747	28.542	4.2415	17.6734			0.0421	-4.2048	50.354	14.927	79.23
		0.0422	-5.0476	28.398	3.7828	17.1137			0.0422	-3.8699	51.201	14.249	79.825
		0.0423	-5.0704	27.919	3.5949	17.1038			0.0423	-3.868	52.139	14.223	81.382
		0.0424	-5.3413	27.536	4.0307	17.5971			0.0424	-3.8509	53.827	14.419	82.306
		0.0425	-5.2768	27.627	4.1877	16.9458			0.0425	-3.7687	54.468	14.607	82.954
		0.0426	-5.5206	27.525	3.4946	16.1756			0.0426	-3.6292	54.712	14.21	84.575
		0.0427	-6.1957	27.079	3.5956	16.0662			0.0427	-3.2697	56.921	14.625	86.01
		0.0428	-5.7837	26.969	4.6101	16.0274			0.0428	-3.3338	59.203	14.976	87.026
		0.0429	-5.3822	26.672	4.8225	16.0611			0.0429	-3.3736	60.644	14.173	88.424
		0.043	-6.3786	26.69	4.3728	16.4831			0.043	-3.7264	61.701	14.366	90.34
		0.0431	-6.4561	27.383	4.5368	16.6919			0.0431	-3.8481	62.84	14.627	91.891
		0.0432	-5.77	27.094	4.5417	16.4532			0.0432	-3.1118	64.443	14.525	92.779
		0.0433	-6.1759	26.539	4.2178	16.206			0.0433	-3.0534	66.429	14.547	93.813
		0.0434	-6.8694	26.432	4.0307	15.6248			0.0434	-3.5867	68.771	15.271	94.761
		0.0435	-6.9842	26.276	3.3748	15.4046			0.0435	-3.5462	69.816	15.734	95.458
		0.0436	-6.8214	26.176	3.4092	15.7496			0.0436	-3.0087	70.136	15.141	95.849
		0.0437	-7.3289	26.374	3.4932	16.1851			0.0437	-3.3147	71.47	15.39	96.296
		0.0438	-7.6624	26.351	2.1484	16.4274			0.0438	-3.3446	72.523	15.187	96.76
		0.0439	-7.5581	26.025	1.3191	16.025			0.0439	-3.2873	73.196	14.692	96.821
		0.044	-7.4462	25.295	0.9739	15.8402			0.044	-3.7108	73.368	15.006	96.554
		0.0441	-7.8151	25.163	0.7296	15.9306			0.0441	-3.8124	73.32	15.047	95.893
		0.0442	-8.4034	25.429	0.5567	15.773			0.0442	-3.5967	72.987	14.513	95.358
		0.0443	-8.2868	25.368	-0.0799	15.915			0.0443	-3.0914	72.324	14.229	94.7
		0.0444	-8.4618	25.149	-1.62005	16.2202			0.0444	-3.2474	71.741	14.45	93.056
		0.0445	-8.2378	24.628	-2.75518	16.1145			0.0445	-3.593	71.25	14.395	91.539
		0.0446	-7.9427	24.597	-2.70276	16.4573			0.0446	-3.6182	70.414	14.205	91.156
		0.0447	-8.2669	25.184	-2.76076	16.591			0.0447	-3.7055	69.353	14.462	90.332
		0.0448	-8.442	25.252	-3.5712	15.9663			0.0448	-3.6853	67.703	14.477	88.353
		0.0449	-8.2438	24.426	-4.1487	15.8528			0.0449	-3.5681	65.914	13.776	86.659
		0.045	-8.0541	23.783	-5.233	15.9914			0.045	-3.2943	65.131	13.643	84.899
		0.0451	-8.4859	23.98	-6.1699	16.0746			0.0451	-3.203	63.796	13.186	83.209
		0.0452	-8.7413	24.082	-5.9895	16.1864			0.0452	-3.548	62.442	12.84	81.723
		0.0453	-8.402	23.979	-6.4028	16.4862			0.0453	-3.6467	61.163	13.338	80.824
		0.0454	-8.0781	23.867	-6.9267	16.3028			0.0454	-3.3643	59.624	12.888	79.789
		0.0455	-8.0634	23.621	-7.6926	15.823			0.0455	-3.4656	58.673	11.874	78.024
		0.0456	-8.0302	23.622	-8.1548	15.7139			0.0456	-3.3686	57.7	11.458	76.935
		0.0457	-7.968	23.37	-7.6081	15.8413			0.0457	-3.1423	56.272	10.901	76.149
		0.0458	-8.2659	23.2	-6.8276	16.3353			0.0458	-3.7391	54.892	10.868	75.558
		0.0459	-8.3536	23.312	-6.6674	16.1183			0.0459	-3.7474	53.908	10.665	74.996
		0.046	-7.9337	23.49	-6.9342	16.3145			0.046	-3.3013	53.415	9.708	74.343
		0.0461	-7.6084	23.651	-7.1804	16.547			0.0461	-3.1864	53.195	9.431	74.627
		0.0462	-7.5803	23.307	-7.1332	15.8583			0.0462	-3.2499	54.048	9.492	74.821
		0.0463	-7.6292	23.47	-6.1863	15.7971			0.0463	-3.2895	55.276	9.737	74.747
		0.0464	-7.7239	24.111	-5.0826	16.0103			0.0464	-3.3654	55.425	9.94	75.316
		0.0465	-7.6641	24.388	-4.3969	16.2081			0.0465	-3.1591	55.779	10.092	75.792
		0.0466	-7.5986	24	-3.7181	16.6469			0.0466	-2.6742	57.294	9.814	76.601
		0.0467	-7.7356	24.168	-3.6489	16.6114			0.0467	-2.2603	59.685	9.48	78.266
		0.0468	-7.5819	24.525	-2.76844	15.9774			0.0468	-2.4221	61.73	9.813	80.095
		0.0469	-7.4849	24.655	-1.34895	15.7071			0.0469	-2.8381	63.204	10.083	82.129
		0.047	-7.5943	24.781	-0.6558	16.3704			0.047	-2.5809	65.514	9.989	84.146
		0.0471	-7.4119	25.228	0.0017	16.8194			0.0471	-2.3673	68.623	10.147	86.296
		0.0472	-7.4703	25.856	0.0283	16.2377			0.0472	-1.9547	70.747	10.47	88.688
		0.0473	-7.5818	25.691	0.5676	16.3384			0.0473	-1.6099	72.939	10.646	90.553
		0.0474	-7.1083	25.875	1.7626	16.6004			0.0474	-2.2081	75.544	10.553	92.625
		0.0475	-6.8525	26.324	2.5922	16.3133			0.0475	-2.1801	77.744	10.909	95.056
		0.0476	-7.0381	26.19	3.0058	16.4224			0.0476	-1.7215	80.895	11.78	97.597
		0.0477	-7.2037	26.409	3.3858	16.3687			0.0477	-1.9165	83.662	12.323	100.418
		0.0478	-7.1165	26.809	3.5925	16.0175			0.0478	-1.8848	85.412	12.535	102.58
		0.0479	-6.9735	26.875	3.3801	16.083			0.0479	-1.8708	88.058	12.392	104.046
		0.048	-6.8978	26.947	3.4314	16.4173			0.048	-1.8317	90.712	12.314	106.127
		0.0481	-6.9608	27.29	3.9994	15.9959			0.0481	-1.4792	92.826	13.141	108.115
		0.0482	-6.8956	27.414	4.9437	15.2463			0.0482	-1.5506	95.297	13.907	109.5
		0.0483	-6.6431	26.859	5.036	15.3391			0.0483	-1.5717	96.958	13.757	111.22
		0.0484	-6.657	27.278	4.381	15.6152			0.0484	-0.94959	98.136	13.807	112.65
		0.0485	-7.1129	27.084	4.2267	15.6561			0.0485	-1.2209	99.483	14.227	114.27
		0.0486	-7.2107	26.543	4.6223	15.3825			0.0486	-1.6944	100.31	14.353	116.03
		0.0487	-6.5945	26.663	4.7644	15.1385			0.0487	-1.3603	100.78	13.841	117.28
		0.0488	-6.3118	26.679	4.4041	14.6457			0.0488	-1.182	101.41	13.356	118.77
		0.0489	-6.5534	26.633	3.7858	14.479			0.0489	-1.3173	101.67	12.964	119.95
		0.049	-6.9981	26.045	3.438	14.9441			0.049	-1.4136	101.14	12.722	120.12
		0.0491	-6.9285	25.335	3.4066	14.2845			0.0491	-1.3061	100.96	12.511	120.03
		0.0492	-6.6983	24.919	3.4792	13.6657			0.0492	-1.6117	100.65	12.802	120.64
		0.0493	-6.4712	24.9	3.1912	14.0824			0.0493	-1.9426	100.13	12.979	120.94
		0.0494	-6.563	24.438	2.5404	13.6737			0.0494	-1.8628	99.279	12.043	121.02
		0.0495	-6.639	23.777	2.4821	13.2665			0.0495	-1.3338	97.721	11.275	121.24
		0.0496	-6.6832	23.987	2.4838	13.3743			0.0496	-1.2993	96.634	11.108	120.59
		0.0497	-6.9006	23.667	2.4116	13.5697			0.0497	-1.989	95.333	11.039	120.04
		0.0498	-6.5114	22.495	2.4091	13.4941			0.0498	-1.945	93.376	10.995	120.09
		0.0499	-6.401	22.44	2.8059	12.8166			0.0499	-1.4109	91.545	10.821	119.35
		0.05	-6.6905	22.686	2.3031	12.8604			0.05	-1.3548	89.926	10.141	118.32
		0.0501	-7.0098	22.461	2.4546	12.8845			0.0501	-1.3455	88.364	9.832	117.97
		0.0502	-6.8639	21.91	2.8339	13.1982			0.0502	-1.4849	86.194	10.592	117.37
		0.0503	-6.4955	21.478	3.1248	13.7341			0.0503	-1.8361	83.519	10.597	116.33
		0.0504	-6.4471	21.515	3.5748	13.4428			0.0504	-1.3125	81.24	9.591	115.73
		0.0505	-6.4848	21.252	3.0895	12.9734			0.0505	-0.98683	79.325	9.685	115.02
		0.0506	-6.9588	20.598	4.1033	12.6953			0.0506	-1.331	77.703	10.397	113.8
		0.0507	-7.2323	20.588	5.2113	12.8284			0.0507	-1.6226	75.804	10.48	112.68
		0.0508	-6.9251	20.673	5.1703	12.7418			0.0508	-1.7616	73.366	10.68	111.23
		0.0509	-6.7141	20.466	5.2785	12.7698			0.0509	-1.5561	70.999	10.865	109.66
		0.051	-6.8359	20.838	5.9003	12.6056			0.051	-1.3032	69.561	10.695	108.609
		0.0511	-7.0778	20.981	6.0436	11.8226			0.0511	-1.3427	68.224	11.076	107.591
		0.0512	-7.048	20.38	6.5166	12.0851			0.0512	-1.4753	66.555	11.468	105.568
		0.0513	-7.0836	20.004	7.1664	12.1182			0.0513	-1.6033	65.072	11.509	103.705
		0.0514	-7.3911	20.295	7.5087	11.441			0.0514	-1.3053	63.989	11.805	102.498
		0.0515	-7.6679	20.777	8.095	11.164			0.0515	-1.1533	63.301	12.595	100.586
		0.0516	-7.7983	20.233	8.524	10.8255			0.0516	-1.8004	62.878	13.28	99.361
		0.0517	-8.0432	19.873	8.509	11.0906			0.0517	-1.6871	62.037	13.144	98.564
		0.0518	-7.9026	20.277	8.087	10.9572			0.0518	-1.0993	60.998	13.246	97.055
		0.0519	-7.7475	20.049	8.144	10.3583			0.0519	-0.98587	60.596	13.217	95.216
		0.052	-8.0372	19.723	8.702	9.78348			0.052	-1.174	61.338	13.157	93.434
		0.0521	-8.3866	19.493	8.79	9.3984			0.0521	-1.5923	61.951	14.253	92.413
		0.0522	-8.506	19.256	8.906	9.29055			0.0522	-1.7419	61.646	15.154	91.712
		0.0523	-8.5026	18.517	9.298	8.88318			0.0523	-1.7682	61.713	15.213	90.969
		0.0524	-9.0241	17.977	8.863	8.76163			0.0524	-1.9029	61.658	14.915	90.155
		0.0525	-8.9928	17.996	8.02	8.35749			0.0525	-2.0175	62.045	14.814	89.204
		0.0526	-8.2226	18.042	7.5253	7.8551			0.0526	-1.9209	62.527	15.018	88.031
		0.0527	-8.401	17.955	7.8056	7.4482			0.0527	-1.6241	63.222	15.165	87.214
		0.0528	-9.1945	17.357	7.9299	6.83			0.0528	-1.9279	63.518	15.419	87.335
		0.0529	-9.5698	16.641	7.1347	6.8786			0.0529	-2.6035	62.899	15.412	87.187
		0.053	-9.2236	16.434	7.4498	7.2083			0.053	-2.6616	62.77	14.648	86.224
		0.0531	-9.0051	15.88	7.1006	6.9219			0.0531	-2.2808	63.632	14.427	85.727
		0.0532	-9.2702	15.276	6.3481	6.332			0.0532	-2.3898	64.322	14.955	85.631
		0.0533	-9.4838	14.795	6.408	6.3751			0.0533	-2.5718	63.845	14.622	85.187
		0.0534	-9.6392	14.612	5.7775	6.6548			0.0534	-2.5251	63.45	13.789	85.105
		0.0535	-9.7824	14.642	5.4202	7.0425			0.0535	-2.883	63.349	13.564	84.783
		0.0536	-10.377	13.81	5.8184	7.3808			0.0536	-3.0229	63.253	13.894	84.23
		0.0537	-10.093	13.25	6.1657	7.0598			0.0537	-2.9863	63.1	13.934	83.993
		0.0538	-9.563	12.961	6.2939	7.5252			0.0538	-2.8984	62.604	13.481	83.931
		0.0539	-9.7916	12.834	6.1148	7.7568			0.0539	-2.6674	62.477	13.118	83.658
		0.054	-9.9914	12.351	5.7991	7.5124			0.054	-3.0611	62.15	13.2	83.07
		0.0541	-10.27	11.746	5.9784	7.9067			0.0541	-3.4048	61.307	12.991	82.546
		0.0542	-10.152	11.728	6.1876	8.08822			0.0542	-3.5058	60.772	12.845	82.123
		0.0543	-9.9124	11.741	6.3625	8.51138			0.0543	-3.432	60.244	12.808	82.356
		0.0544	-10.09	11.886	6.1587	8.95291			0.0544	-3.2211	59.572	13.35	82.372
		0.0545	-10.109	11.508	6.835	9.54506			0.0545	-3.5407	58.793	13.611	81.407
		0.0546	-9.8432	11.221	7.283	10.1374			0.0546	-3.4671	58.091	13.409	80.408
		0.0547	-10.043	11.464	7.6607	10.1668			0.0547	-3.3979	57.398	13.352	80.286
		0.0548	-10.365	12.155	7.9885	10.4557			0.0548	-3.7813	57.115	13.158	80.019
		0.0549	-10.336	12.136	7.7576	10.9427			0.0549	-3.6902	56.682	13.771	79.259
		0.055	-10.222	11.845	8.167	11.9548			0.055	-3.2033	56.078	13.76	78.262
		0.0551	-10.171	11.895	8.37	12.7489			0.0551	-3.3879	55.713	14.074	77.475
		0.0552	-10.393	11.489	9.093	12.9148			0.0552	-3.3377	54.981	14.507	76.784
		0.0553	-10.418	11.909	9.777	13.0912			0.0553	-2.7956	54.046	15.074	75.865
		0.0554	-10.602	12.901	10.417	13.4249			0.0554	-3.0124	53.546	16.074	74.81
		0.0555	-10.86	13.236	10.185	14.0245			0.0555	-3.2453	53.456	16.136	73.904
		0.0556	-10.517	12.662	9.472	14.327			0.0556	-3.1898	53.292	15.86	72.86
		0.0557	-10.373	12.705	10.496	14.3026			0.0557	-2.9988	53.174	15.618	71.321
		0.0558	-10.359	13.662	10.897	14.4852			0.0558	-2.5635	52.68	16.401	70.407
		0.0559	-10.039	13.695	10.779	14.2637			0.0559	-2.5519	51.981	17.044	69.958
		0.056	-10.005	13.359	10.958	13.8216			0.056	-2.9476	51.582	16.855	69.168
		0.0561	-10.654	14.026	9.744	13.9513			0.0561	-3.1108	51.007	17.025	68.144
		0.0562	-10.659	14.358	9.301	14.1058			0.0562	-2.9586	50.845	17.159	67.098
		0.0563	-10.399	14.468	10.208	14.3305			0.0563	-2.7855	51.189	16.9	66.363
		0.0564	-10.571	14.648	10.448	14.6527			0.0564	-2.7417	50.833	16.991	65.763
		0.0565	-10.44	14.788	9.888	14.2761			0.0565	-2.947	49.854	17.335	65.13
		0.0566	-10.291	14.576	9.052	13.5659			0.0566	-3.7187	49.5	16.949	65.104
		0.0567	-10.504	14.053	8.887	13.4136			0.0567	-3.669	50.202	16.257	64.638
		0.0568	-10.642	13.748	9.008	13.8532			0.0568	-2.8905	49.846	15.946	63.808
		0.0569	-10.211	13.399	8.919	13.7063			0.0569	-2.9841	48.636	16.018	63.806
		0.057	-10.263	13.469	8.813	13.3595			0.057	-3.5572	48.374	15.904	63.847
		0.0571	-10.268	13.269	8.964	13.4097			0.0571	-3.6655	48.015	16.227	63.492
		0.0572	-9.9624	12.643	8.437	13.0327			0.0572	-3.8635	47.69	16.277	63.266
		0.0573	-9.8997	12.757	7.6522	12.5138			0.0573	-4.4619	47.328	15.31	63.241
		0.0574	-9.8882	12.45	8.311	12.5639			0.0574	-4.778	46.368	14.327	63.259
		0.0575	-9.6771	11.601	8.577	13.2948			0.0575	-4.7699	45.946	14.239	63.278
		0.0576	-9.1927	10.937	7.2741	13.2641			0.0576	-4.844	45.418	15.114	63.186
		0.0577	-9.0818	10.646	7.144	12.5383			0.0577	-5.1826	44.676	15.003	63.492
		0.0578	-8.9905	10.992	7.4283	12.356			0.0578	-5.2541	44.166	14.786	63.692
		0.0579	-8.955	10.697	7.0776	12.2379			0.0579	-5.2102	43.757	14.534	63.663
		0.058	-8.9135	10.056	7.2566	12.5134			0.058	-5.6024	42.882	14.189	63.104
		0.0581	-8.9119	9.2928	8.094	12.8389			0.0581	-6.0861	41.95	14.668	62.976
		0.0582	-8.9704	8.8382	8.696	12.4746			0.0582	-6.2875	41.828	14.478	63.688
		0.0583	-8.3732	8.5214	8.19	12.324			0.0583	-6.5329	41.433	14.789	64.196
		0.0584	-8.2412	7.9223	7.9202	12.8999			0.0584	-6.6499	40.901	15.263	63.885
		0.0585	-8.4397	7.2096	8.495	12.7964			0.0585	-6.3449	41.05	15.196	62.944
		0.0586	-8.1849	6.5325	9.405	12.473			0.0586	-6.274	40.769	15.284	62.691
		0.0587	-8.084	6.551	10.043	12.633			0.0587	-6.5202	39.609	15.604	62.711
		0.0588	-8.3991	6.7355	10.032	12.2629			0.0588	-6.8118	39.612	16.263	62.545
		0.0589	-8.426	6.4954	9.551	11.9576			0.0589	-6.8812	40.095	17.107	62.305
		0.059	-8.0299	6.0915	9.33	12.1368			0.059	-6.8853	39.985	17.014	61.924
		0.0591	-7.9913	5.974	10.508	12.2358			0.0591	-7.1555	39.912	16.21	61.195
		0.0592	-7.8536	6.157	11.075	12.0625			0.0592	-6.9933	39.746	16.673	60.88
		0.0593	-7.7415	5.9731	10.378	11.7905			0.0593	-6.8292	40.347	17.698	60.469
		0.0594	-8.1603	6.137	10.48	11.5141			0.0594	-6.914	40.646	18.42	60.101
		0.0595	-8.4534	6.2045	10.239	11.6572			0.0595	-6.9535	40.695	18.727	59.893
		0.0596	-8.6148	5.9212	9.942	11.9029			0.0596	-6.7187	41.019	18.891	59.653
		0.0597	-8.5753	6.2026	10.003	11.61			0.0597	-6.4787	40.911	18.598	59.456
		0.0598	-8.2257	7.046	9.725	10.8135			0.0598	-6.5513	41.314	18.666	58.95
		0.0599	-8.3449	7.498	9.877	10.6298			0.0599	-6.7207	42.04	19.042	58.807
		0.06	-8.661	6.7928	9.837	10.8072			0.06	-6.4733	42.761	18.787	59.387
		0.0601	-8.9658	6.5596	8.807	10.6959			0.0601	-6.3251	43.076	18.787	59.441
		0.0602	-9.2774	7.2508	9.393	11.0954			0.0602	-6.4911	43.308	19.127	58.551
		0.0603	-9.4407	7.6602	9.466	11.4861			0.0603	-6.4066	43.373	19.538	58.266
		0.0604	-9.3159	8.1425	7.6824	10.9976			0.0604	-6.1998	43.305	20.021	58.945
		0.0605	-9.3845	8.8447	7.3486	10.2029			0.0605	-6.2709	43.604	19.296	59.327
		0.0606	-9.9409	9.3392	7.4961	10.2211			0.0606	-6.1633	43.868	18.288	59.283
		0.0607	-9.7092	9.7406	7.1947	11.1384			0.0607	-6.1956	43.797	18.456	59.357
		0.0608	-9.3557	9.7254	7.1782	11.4156			0.0608	-6.2875	43.575	18.404	58.96
		0.0609	-9.8776	10.118	6.9659	10.9438			0.0609	-6.2807	43.437	18.083	58.761
		0.061	-10.004	10.922	6.0989	10.678			0.061	-6.0288	43.116	18.04	59.117
		0.0611	-9.6112	11.66	5.9323	10.8372			0.0611	-5.7394	42.765	17.52	59.27
		0.0612	-9.8443	12.009	5.3773	11.5545			0.0612	-6.0936	42.893	16.596	58.98
		0.0613	-10.07	12.359	4.5819	11.8962			0.0613	-6.1641	42.785	16.249	58.52
		0.0614	-9.6499	12.584	5.3496	11.6786			0.0614	-5.9755	41.905	16.264	58.917
		0.0615	-9.4493	13.033	5.247	11.3428			0.0615	-5.7256	41.409	15.733	59.111
		0.0616	-9.4504	13.653	4.5902	11.6204			0.0616	-5.7644	41.196	15.197	58.289
		0.0617	-9.5664	14.195	4.8171	12.1637			0.0617	-5.9045	41.153	14.815	57.965
		0.0618	-9.4789	14.25	4.9859	12.4582			0.0618	-5.7054	40.768	14.266	57.764
		0.0619	-9.376	14.296	4.3541	12.4725			0.0619	-5.919	40.311	14.187	56.972
		0.062	-9.4295	14.921	4.055	12.4758			0.062	-6.2957	40.128	13.858	57.112
		0.0621	-9.0684	15.114	4.8117	12.5289			0.0621	-5.6178	39.355	13.406	57.008
		0.0622	-8.965	15.823	5.3084	12.9245			0.0622	-5.668	38.756	13.395	55.867
		0.0623	-9.1256	16.036	5.5548	13.4355			0.0623	-6.3873	38.65	13.342	55.105
		0.0624	-9.2631	15.648	5.762	13.2459			0.0624	-6.3689	38.7	13.344	54.902
		0.0625	-8.9121	15.911	6.1712	13.7138			0.0625	-6.3036	38.323	12.898	54.359
		0.0626	-8.4121	16.558	5.9273	13.972			0.0626	-5.9685	37.975	11.992	53.567
		0.0627	-8.5287	16.783	5.999	13.9277			0.0627	-5.1934	37.838	12.212	52.926
		0.0628	-8.9164	16.42	6.2161	13.9548			0.0628	-5.549	37.992	12.718	52.225
		0.0629	-9.175	16.281	5.8985	14.5904			0.0629	-6.3468	38.332	12.703	51.852
		0.063	-9.0667	16.73	6.4947	15.6205			0.063	-5.8875	38.181	13.477	51.094
		0.0631	-8.6236	16.764	7.1101	15.7542			0.0631	-5.3754	38.178	13.78	50.314
		0.0632	-8.332	16.573	7.2991	15.4699			0.0632	-5.2801	38.423	12.695	50.314
		0.0633	-8.8446	16.517	6.6625	15.0573			0.0633	-5.2424	38.179	12.215	50.071
		0.0634	-9.0256	16.278	6.3565	15.4641			0.0634	-5.4461	38.229	12.971	49.438
		0.0635	-8.7437	16.741	6.4798	16.1619			0.0635	-5.2486	38.589	13.553	48.852
		0.0636	-8.911	17.275	6.3414	16.7476			0.0636	-4.7756	38.67	13.861	48.835
		0.0637	-8.9164	17.343	6.5181	17.044			0.0637	-4.6954	38.654	13.801	49.048
		0.0638	-8.7504	17.087	6.0715	16.6774			0.0638	-5.0835	38.277	13.554	48.559
		0.0639	-8.6469	17.092	5.7001	16.3295			0.0639	-5.6546	38.207	13.144	47.971
		0.064	-8.792	17.455	5.9307	16.4603			0.064	-5.3002	38.197	12.712	47.889
		0.0641	-8.8563	17.079	5.629	16.7232			0.0641	-4.7731	38.247	13.125	48.31
		0.0642	-8.5298	17.408	5.5717	17.1048			0.0642	-4.998	38.235	13.689	48.574
		0.0643	-8.5293	18.435	5.4401	17.7192			0.0643	-4.7681	38.449	13.659	48.688
		0.0644	-8.9442	18.822	4.7893	18.0495			0.0644	-4.8144	38.455	13.394	48.777
		0.0645	-9.2083	18.994	4.3005	17.7904			0.0645	-5.2221	37.797	13.546	48.793
		0.0646	-8.9695	18.659	4.2176	17.6207			0.0646	-5.2995	38.003	13.12	48.365
		0.0647	-8.7832	18.1	4.2755	18.0095			0.0647	-5.4333	38.489	13.25	48.61
		0.0648	-9.0964	18.707	4.1163	18.3801			0.0648	-5.0996	38.042	13.69	49.123
		0.0649	-9.2414	19.886	3.6327	18.4631			0.0649	-5.117	37.381	13.227	49.436
		0.065	-8.9118	20.14	3.4391	18.7139			0.065	-5.3467	37.029	13.136	49.834
		0.0651	-9.0614	20.411	3.5831	18.8855			0.0651	-5.225	36.872	13.108	49.827
		0.0652	-9.2311	20.806	2.9649	18.5865			0.0652	-5.7336	36.826	12.89	49.389
		0.0653	-9.0072	20.863	3.0409	18.5198			0.0653	-6.3558	36.897	12.805	49.343
		0.0654	-9.0284	21.542	3.6994	18.6219			0.0654	-6.0725	36.573	12.831	49.829
		0.0655	-8.9212	22.535	3.4518	18.8741			0.0655	-6.0602	35.631	12.966	49.655
		0.0656	-9.1726	22.443	2.9955	19.192			0.0656	-6.6386	35.557	12.555	49.558
		0.0657	-9.3451	22.403	3.1304	19.11			0.0657	-6.9327	36.03	12.737	49.655
		0.0658	-8.6817	23.195	3.743	18.941			0.0658	-7.2193	35.611	13.606	50.393
		0.0659	-8.3652	23.568	4.341	19.004			0.0659	-6.8834	35.226	13.186	51.182
		0.066	-8.5573	23.458	5.1155	19.027			0.066	-6.5221	35.2	12.68	51.177
		0.0661	-8.9103	23.789	5.3074	18.6733			0.0661	-6.8378	35.297	13.106	52.075
		0.0662	-8.7486	23.916	4.757	18.4385			0.0662	-6.7591	35.427	13.68	52.665
		0.0663	-8.4745	23.792	4.9072	18.5135			0.0663	-7.0185	35.088	13.921	52.821
		0.0664	-8.7171	24.004	5.6619	18.7282			0.0664	-7.2845	34.588	13.945	53.46
		0.0665	-8.4961	24.091	5.8355	18.7847			0.0665	-6.9736	34.245	13.815	54.458
		0.0666	-8.216	24.227	6.1235	18.0973			0.0666	-7.0212	34.285	13.228	55.452
		0.0667	-7.9997	24.014	6.6812	17.8713			0.0667	-6.7384	34.379	13.175	55.863
		0.0668	-7.9924	23.802	6.6019	17.9152			0.0668	-6.6424	34.464	13.956	56.821
		0.0669	-8.4079	23.768	6.357	17.4117			0.0669	-7.0946	34.375	14.512	58.064
		0.067	-8.3983	24.018	6.3094	17.5543			0.067	-7.2082	33.723	14.389	58.738
		0.0671	-8.2776	24.447	7.0066	17.4295			0.0671	-6.4602	33.209	14.274	59.032
		0.0672	-8.2043	24.11	7.0427	16.9449			0.0672	-6.299	33.114	14.293	59.899
		0.0673	-8.3432	23.439	6.5393	16.7866			0.0673	-6.6595	33.219	14.72	61.148
		0.0674	-8.2253	23.053	7.1987	17.0406			0.0674	-6.4424	33.043	14.868	62.042
		0.0675	-8.0487	22.677	7.6965	17.3404			0.0675	-6.3357	32.719	14.879	63.366
		0.0676	-8.2189	22.654	7.7513	16.8798			0.0676	-5.9956	32.785	15.121	64.787
		0.0677	-8.2181	22.656	8.418	16.2543			0.0677	-5.6028	32.596	14.949	65.128
		0.0678	-8.3295	22.224	8.096	16.3623			0.0678	-5.3266	31.67	14.857	65.472
		0.0679	-8.2612	21.991	7.089	16.3573			0.0679	-5.1822	30.602	15.317	66.439
		0.068	-8.1697	21.423	7.3624	16.1345			0.068	-4.854	30.736	15.584	67.472
		0.0681	-8.3323	20.561	7.9385	16.4173			0.0681	-4.3336	31.287	14.922	68.378
		0.0682	-8.2914	20.003	7.7908	16.4928			0.0682	-4.6298	30.616	14.813	69.13
		0.0683	-8.3404	20.078	7.5201	16.1872			0.0683	-4.7919	30.351	14.883	69.064
		0.0684	-8.4913	20.1	7.1579	15.7672			0.0684	-4.4388	29.876	15.032	68.559
		0.0685	-8.4227	19.134	6.6355	15.6275			0.0685	-4.8636	29.098	15.094	68.387
		0.0686	-8.8729	18.403	6.4342	15.6274			0.0686	-4.5367	29.542	15.119	68.41
		0.0687	-9.0256	18.432	5.8852	15.5904			0.0687	-3.4995	29.424	15.696	68.711
		0.0688	-8.3551	18.214	5.9024	15.6863			0.0688	-3.5584	28.48	15.365	68.938
		0.0689	-8.1801	17.39	6.2343	15.5866			0.0689	-3.7343	28.178	14.502	68.294
		0.069	-9.0979	16.958	6.0073	14.999			0.069	-3.7833	28.618	14.385	67.676
		0.0691	-9.4505	16.624	5.9722	14.5657			0.0691	-3.8656	28.929	14.88	67.229
		0.0692	-8.8314	16.209	5.4541	14.4973			0.0692	-3.186	28.06	15.246	66.106
		0.0693	-8.3482	16.392	5.688	14.0979			0.0693	-2.8485	27.52	14.716	65.556
		0.0694	-8.5125	15.788	6.1652	14.0545			0.0694	-3.0397	27.894	13.943	65.254
		0.0695	-9.1053	15.036	5.7276	14.1712			0.0695	-2.6826	27.536	14.315	64.247
		0.0696	-8.9798	15.2	5.4237	13.5732			0.0696	-2.598	27.35	14.62	63.284
		0.0697	-8.5569	14.847	5.2984	13.2472			0.0697	-3.0321	27.735	14.759	62.872
		0.0698	-8.334	14.155	5.7838	13.1912			0.0698	-2.6611	27.903	15.09	62.17
		0.0699	-8.4613	14.336	5.7147	12.8681			0.0699	-2.3375	27.895	14.622	61.034
		0.07	-8.839	14.58	5.4726	12.5107			0.07	-2.5065	27.751	13.822	60.063
		0.0701	-9.0373	14.06	5.1287	12.2805			0.0701	-2.5691	27.382	14.283	58.876
		0.0702	-8.9514	13.754	4.8054	12.1175			0.0702	-2.5276	27.96	14.837	58.034
		0.0703	-8.4005	13.713	5.4907	12.2793			0.0703	-2.5483	28.227	15.324	57.425
		0.0704	-8.4064	13.521	5.695	12.6198			0.0704	-2.9723	27.885	15.59	56.736
		0.0705	-9.1201	13.948	5.4235	12.5253			0.0705	-2.4934	27.763	14.878	56.144
		0.0706	-9.022	14.447	5.6636	11.9405			0.0706	-2.2424	27.743	14.216	55.409
		0.0707	-8.794	14.382	6.1401	11.3807			0.0707	-2.8078	28.046	14.245	54.717
		0.0708	-8.8506	14.418	5.9989	11.3517			0.0708	-2.4362	28.353	15.055	53.975
		0.0709	-8.7407	14.741	5.8322	12.0453			0.0709	-2.0218	28.362	15.334	53.612
		0.071	-8.7255	15.175	5.785	12.4776			0.071	-2.3179	27.784	15.017	53.319
		0.0711	-8.6453	15.625	5.4815	12.2415			0.0711	-2.6133	27.549	14.6	52.975
		0.0712	-8.7062	16.524	5.7796	11.9963			0.0712	-2.707	27.617	15.119	53.012
		0.0713	-8.7587	17	6.0267	12.5503			0.0713	-2.4471	27.574	15.594	52.806
		0.0714	-8.7212	17.116	5.506	13.0228			0.0714	-2.4501	27.535	15.345	52.814
		0.0715	-8.824	17.579	5.3692	12.6783			0.0715	-2.7723	27.076	15.349	52.903
		0.0716	-8.6195	18.016	4.8864	12.7044			0.0716	-3.1404	26.755	15.084	52.486
		0.0717	-8.4457	18.734	4.3722	13.4483			0.0717	-3.1954	26.971	14.651	52.502
		0.0718	-8.8587	19.815	4.5805	13.9444			0.0718	-3.1987	27.229	15.131	52.948
		0.0719	-8.7413	20.186	3.9948	13.8205			0.0719	-3.4828	27.018	15.857	53.358
		0.072	-8.7034	20.527	3.7982	14.0576			0.072	-2.8424	26.165	15.16	53.585
		0.0721	-8.8694	21.268	3.7637	14.47			0.0721	-3.1898	25.789	14.561	53.342
		0.0722	-8.7247	21.767	3.3832	14.4719			0.0722	-4.1897	26.065	14.839	52.914
		0.0723	-8.8125	21.758	2.9608	14.5492			0.0723	-4.0552	25.912	14.91	52.167
		0.0724	-9.1111	22.408	2.5447	14.3923			0.0724	-3.7094	25.619	14.924	52.454
		0.0725	-9.6264	23.601	2.0565	14.2912			0.0725	-3.568	25.537	14.813	53.4
		0.0726	-8.8883	24.12	2.2967	14.4943			0.0726	-3.4463	25.269	14.403	53.319
		0.0727	-8.0636	24.089	2.3901	14.243			0.0727	-3.9433	24.929	14.257	53.088
		0.0728	-8.6898	24.3	1.4168	14.2374			0.0728	-4.6206	24.498	14.822	52.413
		0.0729	-9.2372	24.777	0.9812	14.4674			0.0729	-4.4548	24.246	14.908	51.812
		0.073	-9.4685	24.817	0.9941	14.2996			0.073	-4.0009	24.085	14.644	51.829
		0.0731	-8.8134	24.98	1.3798	14.1106			0.0731	-4.0873	23.884	14.64	51.957
		0.0732	-8.0728	24.9	1.4817	13.6928			0.0732	-4.3911	23.374	14.18	51.602
		0.0733	-8.4814	24.677	0.9995	13.2001			0.0733	-4.428	23.109	14.046	51.365
		0.0734	-8.506	24.912	0.8079	13.1303			0.0734	-4.7253	23.541	14.388	50.805
		0.0735	-8.4895	25.47	0.7823	12.7811			0.0735	-4.6301	23.179	14.329	50.294
		0.0736	-8.6989	24.733	0.7877	12.6916			0.0736	-4.242	22.35	14.213	50.499
		0.0737	-8.3175	23.884	0.9672	12.3393			0.0737	-3.9809	22.242	13.818	50.05
		0.0738	-7.7206	23.935	1.4496	11.3295			0.0738	-3.9232	22.674	13.844	49.461
		0.0739	-7.7565	23.72	1.6967	11.0344			0.0739	-4.184	22.463	13.846	48.983
		0.074	-7.8252	23.699	1.2057	10.7814			0.074	-4.0602	21.546	13.474	48.498
		0.0741	-7.2517	23.36	1.1821	10.393			0.0741	-3.5059	21.602	13.54	48.099
		0.0742	-7.2073	23.128	1.6835	9.89189			0.0742	-3.441	21.981	13.837	48.04
		0.0743	-7.5675	22.651	1.8112	9.13547			0.0743	-3.6794	21.923	13.869	47.982
		0.0744	-7.3437	22.067	1.8316	8.85104			0.0744	-3.7027	21.43	13.614	47.862
		0.0745	-7.0325	22.033	2.4007	8.59085			0.0745	-3.6217	20.58	13.847	47.084
		0.0746	-6.8404	21.927	2.9185	7.9691			0.0746	-3.2883	20.675	13.749	45.895
		0.0747	-6.854	21.227	3.4473	7.8519			0.0747	-3.2544	21.103	13.477	45.755
		0.0748	-6.5349	20.43	3.3365	7.664			0.0748	-3.5873	20.996	13.554	46.17
		0.0749	-6.2119	20.405	3.4251	7.1605			0.0749	-3.5622	20.786	13.489	46.069
		0.075	-6.561	19.972	3.9713	6.9691			0.075	-3.4484	20.511	13.759	45.274
		0.0751	-6.9315	19.668	4.2136	6.8611			0.0751	-3.7045	20.402	13.302	45.195
		0.0752	-6.9382	20.064	4.4474	6.6464			0.0752	-3.8529	20.452	12.868	45.08
		0.0753	-6.7735	20.051	4.4581	6.7841			0.0753	-3.4633	20.51	12.953	44.705
		0.0754	-6.5527	19.229	4.8516	6.8354			0.0754	-3.4936	20.547	13.013	44.303
		0.0755	-6.7092	18.549	5.456	6.2085			0.0755	-4.0936	20.691	13.284	43.724
		0.0756	-7.2465	18.896	5.778	6.8497			0.0756	-4.3855	20.915	12.786	43.894
		0.0757	-7.3123	19.445	5.6662	7.5168			0.0757	-4.1278	20.994	12.772	43.809
		0.0758	-7.4277	19.595	5.5575	7.4648			0.0758	-3.8394	20.883	13.023	43.856
		0.0759	-8.0533	19.183	6.0008	7.4435			0.0759	-4.1448	20.806	12.637	43.634
		0.076	-8.2495	18.901	6.004	7.3804			0.076	-4.7705	21.274	12.499	43
		0.0761	-8.2744	18.942	5.915	7.5978			0.0761	-4.9701	21.665	12.877	42.889
		0.0762	-8.7093	19.437	6.6486	7.8531			0.0762	-4.7134	21.838	13.363	42.425
		0.0763	-9.2295	19.796	6.8797	8.04484			0.0763	-4.449	21.955	12.93	42.283
		0.0764	-9.1813	19.082	6.4639	8.33657			0.0764	-4.4309	22.059	12.745	43.151
		0.0765	-9.5459	18.777	6.5956	8.95492			0.0765	-5.0006	22.568	13.15	43.013
		0.0766	-10.513	18.923	7.2946	8.86269			0.0766	-5.3098	22.563	12.999	42.334
		0.0767	-10.593	19.136	7.0565	8.7015			0.0767	-5.0862	23.318	12.621	42.509
		0.0768	-10.279	19.431	6.692	9.29297			0.0768	-4.7513	24.77	12.726	42.806
		0.0769	-10.476	19.558	6.4832	9.94428			0.0769	-4.7222	25.413	13.208	43.063
		0.077	-11.222	19.324	6.3137	9.90026			0.077	-4.913	25.897	13.22	43.007
		0.0771	-11.519	18.804	6.3692	9.65424			0.0771	-4.8356	26.235	13.087	42.975
		0.0772	-11.458	18.611	6.2312	9.76071			0.0772	-5.036	26.931	12.752	43.65
		0.0773	-11.714	18.598	6.2552	10.0721			0.0773	-5.2283	28.321	12.709	43.53
		0.0774	-11.436	18.811	5.9568	10.2169			0.0774	-4.4204	29.871	13.165	43.298
		0.0775	-11.406	18.869	6.3081	10.3358			0.0775	-3.8001	30.869	13.621	44.297
		0.0776	-12.278	18.646	6.3093	10.3876			0.0776	-4.254	32.069	13.212	44.942
		0.0777	-12.327	18.228	5.6797	9.85735			0.0777	-4.1981	33.385	12.666	45.597
		0.0778	-11.887	17.58	5.139	9.65759			0.0778	-3.8478	34.023	12.541	45.858
		0.0779	-11.752	17.792	4.8782	9.62728			0.0779	-3.873	35.134	12.68	46.476
		0.078	-11.785	17.809	5.5602	9.44169			0.078	-3.5884	36.259	12.768	47.859
		0.0781	-11.91	17.202	5.5109	9.34518			0.0781	-3.3922	37.608	12.892	48.422
		0.0782	-11.757	17.033	4.8261	9.22544			0.0782	-3.6484	38.899	13.043	49.513
		0.0783	-11.637	16.871	5.2236	9.08831			0.0783	-3.5241	39.587	12.409	50.816
		0.0784	-11.929	16.564	5.0275	8.88866			0.0784	-3.1715	40.438	12.205	51.704
		0.0785	-11.617	16.075	4.0892	9.13577			0.0785	-3.3865	41.52	12.625	52.545
		0.0786	-11.291	15.997	3.8903	9.26248			0.0786	-3.5718	43.052	13.3	53.415
		0.0787	-11.315	15.666	3.5312	8.81611			0.0787	-3.5945	44.044	13.254	54.638
		0.0788	-10.952	14.982	3.0882	8.48996			0.0788	-4.0274	44.665	12.793	56.264
		0.0789	-10.943	14.917	3.4722	8.55891			0.0789	-4.2813	45.066	13.067	57.051
		0.079	-10.897	14.668	4.1072	8.54107			0.079	-4.0471	45.09	13.14	57.551
		0.0791	-10.734	14.148	3.6543	8.37265			0.0791	-3.385	46.067	13.367	58.917
		0.0792	-10.08	13.636	3.6031	8.54063			0.0792	-3.6632	47.211	13.497	60.127
		0.0793	-9.5531	13.665	4.109	9.17957			0.0793	-4.6468	47.54	13.346	61.005
		0.0794	-9.9854	13.518	3.6545	8.88328			0.0794	-4.8037	47.713	13.478	61.873
		0.0795	-10.026	12.742	3.2837	8.14054			0.0795	-4.3327	47.332	14.008	62.696
		0.0796	-10.204	12.381	3.869	8.5606			0.0796	-4.3907	47.332	13.987	63.205
		0.0797	-10.001	12.032	4.2431	8.98413			0.0797	-4.7169	47.906	13.539	63.876
		0.0798	-8.9855	11.817	3.7831	8.63715			0.0798	-5.109	47.515	14.276	64.545
		0.0799	-8.9898	11.801	3.8067	8.6508			0.0799	-5.6745	46.876	14.448	64.209
		0.08	-9.4684	11.455	4.6437	8.7875			0.08	-5.8927	46.401	14.143	64.165
		0.0801	-9.4307	10.99	4.8106	8.82904			0.0801	-5.572	46.14	14.037	64.716
		0.0802	-9.7577	10.784	4.3498	8.9283			0.0802	-5.5919	45.551	14.034	63.982
		0.0803	-9.4184	10.304	4.0038	9.00362			0.0803	-6.0619	45.086	15.069	63.111
		0.0804	-9.1285	9.867	4.0573	8.94942			0.0804	-6.1524	44.79	15.333	62.981
		0.0805	-9.0905	9.7836	4.799	8.37096			0.0805	-6.1783	44.041	14.649	62.67
		0.0806	-9.3351	9.5453	5.3676	8.52457			0.0806	-6.0054	42.976	14.318	62.065
		0.0807	-9.6852	9.2352	5.5092	8.86036			0.0807	-6.2089	42.265	14.465	61.228
		0.0808	-9.5088	8.5002	5.5838	9.19401			0.0808	-6.351	42.28	14.8	60.624
		0.0809	-9.4745	8.1	5.6704	9.41913			0.0809	-5.9508	41.708	14.786	59.728
		0.081	-9.2626	7.8607	5.9285	9.19071			0.081	-5.4573	40.63	15.063	58.026
		0.0811	-9.4112	7.2487	6.081	8.87641			0.0811	-5.5159	39.834	15.24	56.849
		0.0812	-9.5867	7.0527	6.2673	9.09501			0.0812	-5.3559	39.161	14.773	56.336
		0.0813	-9.5189	6.9414	6.4503	9.54027			0.0813	-5.149	38.452	14.411	55.552
		0.0814	-9.3359	6.0795	6.3141	9.48177			0.0814	-5.1575	38.266	14.372	54.311
		0.0815	-9.3447	5.4579	6.4587	9.58671			0.0815	-4.7135	38.38	15.067	53.08
		0.0816	-9.9094	5.6303	6.4898	9.58475			0.0816	-4.4133	37.11	15.399	51.938
		0.0817	-10.032	6.1515	6.1184	10.07			0.0817	-4.5257	36.168	14.207	50.829
		0.0818	-9.4745	6.0904	5.8662	9.9303			0.0818	-4.2546	35.934	13.691	49.999
		0.0819	-9.55	5.3415	6.0974	9.3879			0.0819	-3.7785	35.53	14.31	49.21
		0.082	-9.4853	5.1194	6.0723	10.2523			0.082	-3.6477	35.619	15.343	47.815
		0.0821	-9.6061	4.8624	5.7163	10.331			0.0821	-3.6304	34.736	15.494	46.865
		0.0822	-9.782	5.0623	5.1076	9.78367			0.0822	-3.6752	34.326	14.535	47.146
		0.0823	-9.0908	5.0461	5.2903	9.83153			0.0823	-3.4961	34.746	13.774	47.076
		0.0824	-9.3953	5.5237	5.6289	10.3204			0.0824	-3.1534	34.668	13.892	46.222
		0.0825	-9.9029	5.5668	4.9609	10.394			0.0825	-3.034	34.549	14.367	45.62
		0.0826	-10.029	4.5304	4.7957	10.24			0.0826	-3.2477	34.438	14.118	45.444
		0.0827	-9.7752	4.3804	5.0206	10.1241			0.0827	-3.4599	34.176	14.496	45.058
		0.0828	-9.4233	4.8785	4.8214	10.0618			0.0828	-4.1057	33.452	14.752	44.775
		0.0829	-9.6411	5.0706	4.4459	10.2815			0.0829	-4.6044	33.21	13.631	44.427
		0.083	-9.6348	4.9907	4.2738	10.1571			0.083	-4.078	33.5	12.817	44.627
		0.0831	-9.585	5.245	4.3663	10.3868			0.0831	-4.2709	33.332	13.154	45.83
		0.0832	-9.7429	5.2126	4.5819	10.7981			0.0832	-5.1253	33.043	13.418	46.699
		0.0833	-10.416	5.4569	4.3835	10.621			0.0833	-5.178	32.374	13.172	47.32
		0.0834	-10.564	6.3717	4.5103	10.6859			0.0834	-5.593	31.934	12.539	48.035
		0.0835	-10.149	6.2907	4.6775	10.7991			0.0835	-6.6998	31.354	12.031	48.711
		0.0836	-9.7222	5.6144	4.5657	10.6081			0.0836	-7.4875	30.379	12.788	49.633
		0.0837	-9.6973	5.6718	4.5282	10.8577			0.0837	-7.7802	30.307	12.996	50.817
		0.0838	-10.304	6.1576	4.1474	11.1043			0.0838	-7.9139	29.842	12.066	52.215
		0.0839	-10.534	6.2523	4.402	11.4687			0.0839	-8.6013	29.276	11.757	54.281
		0.084	-10.573	6.2024	5.1594	12.1075			0.084	-8.9842	28.89	11.88	55.644
		0.0841	-10.295	5.9492	5.4419	11.6493			0.0841	-9.1965	27.948	12.366	56.158
		0.0842	-10.296	5.2666	5.9488	10.7524			0.0842	-10.207	27.764	12.342	57.424
		0.0843	-10.585	5.1482	6.4335	11.1334			0.0843	-10.916	27.232	11.541	58.746
		0.0844	-10.493	5.3713	6.3406	11.8889			0.0844	-11.192	26.589	11.914	59.635
		0.0845	-10.528	5.1726	6.171	11.9538			0.0845	-11.097	26.031	11.715	60.874
		0.0846	-10.737	4.5516	6.7226	11.4271			0.0846	-11.251	25.388	10.791	62.144
		0.0847	-10.754	4.4413	7.2087	11.2887			0.0847	-11.731	25.138	11.171	63.194
		0.0848	-10.668	3.9481	7.6064	11.5019			0.0848	-11.977	25.174	11.485	64.32
		0.0849	-10.543	3.6546	8.066	11.851			0.0849	-11.719	24.981	11.787	65.635
		0.085	-10.626	3.6276	8.05	11.8922			0.085	-11.86	24.248	11.475	66.883
		0.0851	-11.415	3.7347	7.7489	11.5073			0.0851	-12.181	23.425	10.601	67.638
		0.0852	-11.391	3.5707	7.7615	11.1408			0.0852	-12.21	22.994	10.295	68.366
		0.0853	-10.263	2.7523	8.194	10.7378			0.0853	-12.379	22.931	10.731	69.357
		0.0854	-9.9481	1.9422	9.223	10.9568			0.0854	-11.936	23.893	11.17	70.064
		0.0855	-10.383	1.4094	9.099	11.562			0.0855	-11.75	23.986	10.503	70.522
		0.0856	-10.508	1.383	8.213	11.5813			0.0856	-11.982	22.939	10.343	71.168
		0.0857	-10.415	1.3371	8.388	11.3529			0.0857	-11.692	23.059	10.336	71.034
		0.0858	-10.425	1.2723	8.376	11.224			0.0858	-11.445	23.633	10.214	71.003
		0.0859	-10.333	0.94437	8.648	10.8786			0.0859	-11.535	25.12	10.739	71.487
		0.086	-10.172	0.2531	9.546	10.7669			0.086	-10.975	26.037	10.644	71.801
		0.0861	-9.9951	-0.016425	9.741	11.02			0.0861	-10.525	26.187	10.027	71.305
		0.0862	-10.079	0.27748	8.93	11.174			0.0862	-10.645	27.171	10.146	70.785
		0.0863	-9.8147	0.48789	8.41	11.0973			0.0863	-10.409	28.25	10.768	70.48
		0.0864	-9.1597	0.19681	8.432	10.9611			0.0864	-10.326	29.751	10.987	70.007
		0.0865	-9.489	-0.26731	8.32	11.2073			0.0865	-10.242	31.105	10.956	70.138
		0.0866	-9.8765	-0.11973	8.214	11.717			0.0866	-10.033	32.006	11.185	69.788
		0.0867	-9.2515	0.37519	8.158	11.6845			0.0867	-9.8494	33.519	10.79	68.632
		0.0868	-9.1281	0.36386	8.06	11.7138			0.0868	-9.7455	34.665	10.215	67.807
		0.0869	-9.323	0.43078	7.8573	11.7908			0.0869	-9.8396	36.481	10.922	67.64
		0.087	-8.7443	0.63249	7.4254	11.6912			0.087	-10.067	38.252	11.919	67.004
		0.0871	-8.6258	0.43526	7.1034	11.9889			0.0871	-10.326	38.841	11.847	65.866
		0.0872	-8.5202	0.70763	7.2426	12.1952			0.0872	-9.9905	40.068	11.175	64.822
		0.0873	-8.4861	1.2091	7.3537	12.6415			0.0873	-9.8188	41.567	11.164	64.585
		0.0874	-8.0776	1.0718	7.0939	12.9554			0.0874	-9.9513	43.232	10.653	63.756
		0.0875	-7.7787	1.6164	6.824	13.1167			0.0875	-9.6715	44.784	10.726	62.161
		0.0876	-8.1658	1.8317	6.7703	13.3404			0.0876	-9.8775	46.198	11.784	61.615
		0.0877	-8.1159	1.8747	7.2521	13.4586			0.0877	-10.171	47.721	12.473	60.583
		0.0878	-8.0258	2.7017	6.7779	13.6366			0.0878	-9.9087	48.572	12.158	59.071
		0.0879	-7.7877	2.514	5.9738	13.9413			0.0879	-9.9559	48.923	11.501	58.487
		0.088	-7.0861	2.1466	6.2415	14.2689			0.088	-10.157	49.833	11.527	58.029
		0.0881	-6.7722	2.2681	6.7858	14.358			0.0881	-9.5382	51.317	12.014	57.355
		0.0882	-7.1368	2.0179	6.5845	14.5159			0.0882	-9.3606	51.936	12.845	56.352
		0.0883	-7.3993	2.2105	5.9226	14.6831			0.0883	-9.9623	51.84	12.788	55.904
		0.0884	-7.5036	2.5516	5.2472	14.9897			0.0884	-9.9775	52.093	12.181	55.793
		0.0885	-7.2123	2.6836	5.9345	15.6307			0.0885	-9.9855	52.703	11.97	55.087
		0.0886	-6.9874	2.3612	6.5812	15.3057			0.0886	-9.5993	52.387	12.194	54.756
		0.0887	-6.8295	1.1895	5.9823	15.0862			0.0887	-9.4368	52.163	12.613	55.098
		0.0888	-6.9219	0.6624	5.5196	15.7412			0.0888	-9.3621	52.27	13.141	55.123
		0.0889	-7.4889	0.56925	5.6383	16.1089			0.0889	-8.6714	51.284	12.874	55.105
		0.089	-7.4179	0.79212	6.1687	16.1683			0.089	-8.4401	50.589	12.294	55.686
		0.0891	-6.93	0.77246	5.7955	16.1881			0.0891	-8.5339	50.592	12.265	56.099
		0.0892	-7.006	0.41334	5.571	15.9026			0.0892	-8.0938	50.696	12.794	56.201
		0.0893	-7.381	0.23031	5.9526	15.2613			0.0893	-7.4854	50.606	13.099	56.113
		0.0894	-7.7813	-0.33977	6.2079	15.6387			0.0894	-7.3321	49.987	13	55.882
		0.0895	-7.8957	-0.98647	5.6711	15.8433			0.0895	-7.2083	49.333	12.832	55.96
		0.0896	-7.7437	-1.462	5.1207	15.6665			0.0896	-6.5854	48.902	13.097	56.961
		0.0897	-7.7325	-1.2787	5.3257	15.4576			0.0897	-6.1403	48.381	13.391	57.989
		0.0898	-7.9116	-1.5017	5.2634	14.823			0.0898	-6.1681	47.968	13.017	58.24
		0.0899	-8.3229	-2.3259	4.9167	14.3116			0.0899	-5.886	48.35	12.743	57.805
		0.09	-8.7654	-2.5022	5.2936	14.2967			0.09	-6.0906	48.303	12.864	57.795
		0.0901	-9.0743	-2.6532	5.8792	14.0601			0.0901	-5.9186	47.957	13.159	58.398
		0.0902	-9.5965	-3.2632	4.9846	13.6642			0.0902	-5.0528	47.911	13.186	58.341
		0.0903	-9.6752	-3.4443	4.3245	13.1173			0.0903	-5.1698	47.342	12.747	58.773
		0.0904	-9.4759	-3.6878	4.4609	12.7232			0.0904	-5.618	47.282	12.736	58.947
		0.0905	-9.6242	-4.1658	5.0187	12.7571			0.0905	-5.4133	47.572	12.71	58.802
		0.0906	-9.6951	-4.1096	5.0563	12.8498			0.0906	-5.2846	47.489	12.171	59.145
		0.0907	-9.94	-4.0462	4.5696	13.1418			0.0907	-5.2359	47.576	12.297	58.946
		0.0908	-9.8798	-4.3787	4.8458	12.3289			0.0908	-5.1378	47.989	12.719	58.24
		0.0909	-9.9265	-4.5996	4.6576	11.1827			0.0909	-5.3037	48.709	12.98	57.754
		0.091	-10.25	-4.5666	4.4637	11.1919			0.091	-5.4695	49.278	12.439	57.818
		0.0911	-10.032	-4.7065	5.0333	11.5204			0.0911	-5.5067	49.252	11.797	57.64
		0.0912	-9.7481	-4.6906	5.0604	11.3726			0.0912	-6.0263	49.411	11.977	57.39
		0.0913	-9.6335	-4.6945	5.0384	10.9723			0.0913	-6.6293	50.164	12.179	56.811
		0.0914	-9.7591	-4.844	5.1634	10.4068			0.0914	-6.7903	50.945	12.431	55.978
		0.0915	-9.702	-4.7458	4.395	10.4739			0.0915	-6.6371	51.396	12.225	55.379
		0.0916	-9.4463	-4.1586	4.4089	10.3764			0.0916	-6.3881	51.549	11.781	54.886
		0.0917	-9.1394	-4.5026	5.4104	10.4387			0.0917	-6.8607	51.826	11.959	54.741
		0.0918	-9.134	-5.151	5.9264	10.5115			0.0918	-7.3634	52.456	13.007	54.347
		0.0919	-9.074	-4.7794	5.5986	9.89299			0.0919	-7.6235	52.089	13.098	53.195
		0.092	-8.5017	-4.679	5.4156	9.6169			0.092	-7.5609	52.243	12.369	52.337
		0.0921	-8.3877	-4.9594	5.9763	9.63876			0.0921	-7.401	53.356	12.227	52.548
		0.0922	-8.5277	-4.8856	5.7784	10.0373			0.0922	-7.5011	53.386	12.302	52.599
		0.0923	-7.9948	-4.1467	5.4765	10.516			0.0923	-7.148	53.025	12.635	51.625
		0.0924	-7.1502	-4.0258	5.8355	10.1895			0.0924	-7.2094	53.284	12.803	51.119
		0.0925	-6.5491	-4.8708	5.8443	9.82584			0.0925	-7.3673	53.34	13.256	50.654
		0.0926	-6.6033	-4.9734	6.0372	9.89465			0.0926	-7.2163	53.12	13.344	50.049
		0.0927	-7.0068	-4.6324	6.032	10.1378			0.0927	-7.5785	52.909	12.775	49.856
		0.0928	-6.9616	-4.7077	6.6373	10.3438			0.0928	-7.5164	52.698	12.152	50.135
		0.0929	-6.2981	-4.7091	6.9082	10.1088			0.0929	-7.129	52.96	11.934	49.991
		0.093	-5.8104	-4.7609	6.1548	10.3476			0.093	-7.3198	52.516	12.065	49.237
		0.0931	-5.9382	-4.9397	5.7654	10.5856			0.0931	-7.5789	51.745	12.361	48.889
		0.0932	-5.891	-4.8629	6.2629	10.4638			0.0932	-7.0057	51.643	12.711	48.573
		0.0933	-6.246	-5.1123	6.5826	10.6463			0.0933	-6.7034	51.077	11.923	48.819
		0.0934	-6.2473	-5.4123	6.1483	11.35			0.0934	-7.1515	50.547	11.174	49.022
		0.0935	-5.9437	-5.0787	5.6942	11.55			0.0935	-7.1128	50.613	10.942	48.923
		0.0936	-6.1012	-5.2937	5.3833	11.0823			0.0936	-6.8868	50.262	10.825	48.549
		0.0937	-6.1152	-5.5498	5.6575	10.8335			0.0937	-6.5768	49.999	11.045	48.69
		0.0938	-6.0726	-5.4412	5.5459	11.4899			0.0938	-6.3659	49.47	10.688	49.257
		0.0939	-6.2997	-5.3675	5.4492	12.2085			0.0939	-6.6484	48.855	10.463	49.34
		0.094	-6.6233	-5.2209	5.3984	12.5471			0.094	-6.3701	48.002	10.101	49.114
		0.0941	-6.7199	-5.3428	4.9098	12.6856			0.0941	-6.2925	48.006	9.396	49.1
		0.0942	-7.0621	-5.5852	4.7022	12.3223			0.0942	-6.7614	48.598	9.858	49.037
		0.0943	-6.9139	-5.6634	4.3261	12.1342			0.0943	-6.7739	47.732	9.971	48.886
		0.0944	-7.2707	-5.6307	4.3778	12.449			0.0944	-7.0062	46.996	8.579	49.133
		0.0945	-8.149	-5.4114	4.7502	13.2218			0.0945	-7.107	46.798	8.492	49.547
		0.0946	-8.2224	-5.1556	5.0044	13.6277			0.0946	-6.7345	46.908	9.332	49.502
		0.0947	-8.2006	-4.9339	4.2782	13.2549			0.0947	-6.876	46.726	9.009	48.747
		0.0948	-8.3823	-5.0996	3.6013	12.909			0.0948	-7.1405	46.454	9.037	48.346
		0.0949	-8.5908	-5.3477	3.8285	12.9122			0.0949	-7.6506	46.275	9.257	48.288
		0.095	-8.8236	-5.04	3.513	13.2966			0.095	-8.0323	46.139	8.561	49.183
		0.0951	-9.0876	-4.779	4.2918	13.852			0.0951	-7.964	46.449	8.323	50.461
		0.0952	-9.2646	-4.8376	4.0599	13.8312			0.0952	-8.3491	46.282	9.048	51.396
		0.0953	-9.4619	-5.0487	2.9335	13.9095			0.0953	-8.2173	46.119	9.425	51.746
		0.0954	-9.2287	-4.5374	3.6498	13.472			0.0954	-8.2472	45.911	9.448	52.053
		0.0955	-8.7837	-3.6578	4.1083	12.9915			0.0955	-9.1035	45.831	9.797	52.925
		0.0956	-8.7055	-4.1243	3.5632	13.4888			0.0956	-9.5802	45.909	9.507	54.174
		0.0957	-8.7943	-4.5711	3.509	13.3767			0.0957	-9.8931	45.439	9.22	55.807
		0.0958	-8.9439	-4.5485	3.86	13.2606			0.0958	-9.7983	45.09	9.95	57.218
		0.0959	-8.9024	-4.9185	4.1881	13.2727			0.0959	-9.9094	45.169	10.825	58.291
		0.096	-8.973	-4.7218	4.4552	12.8371			0.096	-10.579	45.516	11.15	59.753
		0.0961	-9.1908	-4.8309	4.3438	12.2343			0.0961	-10.448	45.541	11.127	61.65
		0.0962	-8.999	-5.028	4.3338	12.3565			0.0962	-10.681	44.753	11.085	63.356
		0.0963	-8.4422	-5.1758	4.62	12.3267			0.0963	-11.279	44.038	11.674	64.813
		0.0964	-8.1623	-5.2294	4.6388	11.0845			0.0964	-11.208	44.433	12.299	66.552
		0.0965	-8.6064	-5.3912	4.5527	10.5144			0.0965	-10.852	44.581	12.594	68.453
		0.0966	-9.0211	-5.4315	5.0367	10.8391			0.0966	-10.774	44.045	13.129	70.155
		0.0967	-8.966	-5.5681	5.8045	10.7491			0.0967	-10.95	43.638	12.93	72.443
		0.0968	-8.465	-5.781	6.0455	10.2697			0.0968	-11.006	43.218	13.207	75.065
		0.0969	-8.2567	-5.7657	5.3567	9.83721			0.0969	-11.143	42.806	13.798	77.532
		0.097	-8.6281	-6.2176	5.6993	9.3314			0.097	-11.128	42.23	13.529	78.873
		0.0971	-8.849	-5.8298	6.6561	9.20673			0.0971	-11.071	41.847	13.828	80.233
		0.0972	-8.5219	-5.6263	7.0005	9.48877			0.0972	-11.126	41.89	14.137	82.663
		0.0973	-8.0796	-5.9005	6.9954	9.27491			0.0973	-11.005	41.398	14.051	84.532
		0.0974	-8.6059	-6.0963	7.3429	8.93661			0.0974	-10.665	40.934	13.862	85.345
		0.0975	-9.4951	-6.5939	7.5018	8.77373			0.0975	-10.638	40.597	13.872	86.005
		0.0976	-9.4439	-6.9529	7.6477	8.84472			0.0976	-10.795	40.184	13.873	86.678
		0.0977	-9.1267	-6.3065	8.02	9.44054			0.0977	-10.202	39.874	14.223	87.712
		0.0978	-9.4079	-6.067	8.036	9.78998			0.0978	-9.9812	39.125	14.274	88.438
		0.0979	-9.9269	-6.6692	8.455	9.8173			0.0979	-10.552	38.692	13.647	88.435
		0.098	-10.099	-6.9661	8.754	10.2729			0.098	-10.445	38.56	13.187	88.405
		0.0981	-10.414	-6.8105	8.83	10.8741			0.0981	-10.089	38.205	13.125	88.476
		0.0982	-10.897	-6.522	8.695	11.0835			0.0982	-9.7045	38.055	13.489	87.762
		0.0983	-10.883	-6.3615	9.179	11.6171			0.0983	-9.5956	37.553	13.481	86.679
		0.0984	-11.181	-6.1606	9.58	12.706			0.0984	-9.6664	36.577	12.428	86.291
		0.0985	-11.57	-6.6938	9.184	13.4826			0.0985	-9.5763	36.316	11.58	85.836
		0.0986	-11.65	-6.6134	8.94	13.8267			0.0986	-9.6423	36.184	11.493	85.103
		0.0987	-11.926	-6.1531	8.75	14.6683			0.0987	-9.688	35.984	12.002	84.38
		0.0988	-12.22	-6.2823	8.728	15.4538			0.0988	-9.5612	36.117	12.149	83.905
		0.0989	-12.364	-6.3701	9.373	16.2353			0.0989	-9.5814	35.768	11.677	83.534
		0.099	-12.071	-6.2073	9.101	17.4746			0.099	-9.4714	35.323	11.418	82.602
		0.0991	-12.269	-6.2718	8.156	17.7008			0.0991	-9.0802	35.437	11.258	81.67
		0.0992	-12.602	-6.4432	8.032	18.1941			0.0992	-9.1029	35.19	11.451	82.199
		0.0993	-12.641	-6.4134	8.43	18.8308			0.0993	-9.1613	34.718	11.189	83.26
		0.0994	-12.725	-6.2032	8.79	19.526			0.0994	-9.0725	34.56	11.468	83.337
		0.0995	-12.5	-5.8597	8.4	20.887			0.0995	-9.1102	34.474	11.856	83.971
		0.0996	-12.869	-6.2065	7.739	21.338			0.0996	-8.8216	34.195	11.543	85.076
		0.0997	-12.957	-6.652	7.0247	21.537			0.0997	-8.5179	33.89	11.788	85.922
		0.0998	-12.603	-6.0704	7.0581	22.102			0.0998	-8.3077	34.102	12.196	87.462
		0.0999	-12.822	-5.4304	7.5456	22.389			0.0999	-8.2463	33.643	12.193	89.291
		0.1	-12.779	-5.9539	7.368	22.796			0.1	-8.0913	32.995	11.7	91.951
		0.1001	-12.695	-6.2962	7.462	23.804			0.1001	-8.0566	32.829	11.524	94.256
		0.1002	-12.812	-5.9159	6.9574	24.426			0.1002	-8.213	32.518	12.305	95.931
		0.1003	-12.318	-5.8848	6.195	23.809			0.1003	-7.8598	32.196	12.805	97.932
		0.1004	-11.847	-5.5977	6.295	23.394			0.1004	-7.7932	32.318	12.375	100.623
		0.1005	-11.948	-5.0353	6.162	24.042			0.1005	-8.062	31.961	12.406	104.064
		0.1006	-12.084	-5.381	5.7466	24.13			0.1006	-7.5718	31.136	12.738	107.203
		0.1007	-11.84	-5.4605	5.3117	23.66			0.1007	-7.1265	30.614	12.783	109.91
		0.1008	-11.9	-5.0037	5.4376	23.642			0.1008	-7.4501	30.267	13.23	112.78
		0.1009	-11.794	-4.8349	5.9306	23.38			0.1009	-7.0733	30.172	12.85	115.83
		0.101	-11.236	-4.5509	5.8442	23.031			0.101	-7.1726	29.35	12.413	118.38
		0.1011	-11.067	-4.1722	5.6241	22.892			0.1011	-7.3211	28.349	12.571	120.76
		0.1012	-11.383	-3.8117	5.503	22.694			0.1012	-7.0368	27.802	12.485	123.04
		0.1013	-11.605	-3.806	5.6945	22.272			0.1013	-6.6448	27.543	12.519	124.63
		0.1014	-11.925	-3.5536	5.8705	21.717			0.1014	-6.5719	27.369	12.549	125.79
		0.1015	-12.216	-3.3127	5.561	20.929			0.1015	-6.9059	26.669	12.382	127.15
		0.1016	-11.655	-2.9337	5.5614	20.534			0.1016	-6.4467	25.725	11.737	128.71
		0.1017	-11.457	-2.0027	5.9014	20.978			0.1017	-6.1339	25.151	10.884	129.19
		0.1018	-11.322	-1.8142	7.054	20.984			0.1018	-6.3662	24.983	11.014	128.63
		0.1019	-11.3	-2.0582	7.8254	20.056			0.1019	-6.9701	24.863	11.231	127.8
		0.102	-11.723	-1.5781	7.1629	19.391			0.102	-7.1131	24.315	11.114	127.22
		0.1021	-11.734	-0.73052	7.16	19.026			0.1021	-6.6798	24.211	10.689	127.7
		0.1022	-11.457	-0.25691	7.4368	18.571			0.1022	-6.4878	24.188	10.566	127.73
		0.1023	-11.08	-0.18168	7.9338	18.9909			0.1023	-6.6501	23.773	11.376	126.58
		0.1024	-11.221	-0.23576	8.615	18.9152			0.1024	-7.1748	23.581	11.169	125.32
		0.1025	-11.67	0.10672	9.154	18.4746			0.1025	-7.4122	23.402	11.318	124.24
		0.1026	-11.433	1.1052	9.274	18.4421			0.1026	-7.1685	23.316	11.356	123.45
		0.1027	-10.854	1.5951	8.732	18.5092			0.1027	-6.8434	23.497	10.943	122.71
		0.1028	-10.742	1.3374	9.282	18.9206			0.1028	-7.3825	23.979	11.473	121.51
		0.1029	-11.204	1.3682	10.529	18.8178			0.1029	-7.8066	24.236	11.661	120.19
		0.103	-11.521	1.6145	10.641	18.7471			0.103	-7.6814	23.822	11.834	119.2
		0.1031	-11.002	2.1768	10.376	19.014			0.1031	-7.8723	23.941	11.416	118.74
		0.1032	-10.524	2.3442	10.028	19.654			0.1032	-7.8647	25.5	11.361	117.82
		0.1033	-10.588	2.1246	10.222	19.771			0.1033	-8.1037	27.473	11.931	116.71
		0.1034	-10.386	2.5131	11.728	19.299			0.1034	-8.1468	28.795	11.958	116.3
		0.1035	-10.384	3.111	11.321	19.368			0.1035	-8.5878	30.017	11.714	115.56
		0.1036	-10.073	2.9689	10.683	19.388			0.1036	-9.1498	31.313	12.124	114.97
		0.1037	-9.6274	2.6977	11.396	19.501			0.1037	-9.1142	32.321	12.518	115.68
		0.1038	-9.9439	2.7359	11.644	19.547			0.1038	-8.498	34.549	12.499	116.13
		0.1039	-9.591	2.9594	11.532	19.841			0.1039	-8.2415	37.181	12.844	116.07
		0.104	-9.1735	3.5165	11.091	20.41			0.104	-8.8615	39.139	13.473	116.84
		0.1041	-9.8879	3.4806	11.243	19.99			0.1041	-9.1373	41.121	13.885	117.59
		0.1042	-9.9798	3.2779	11.464	19.542			0.1042	-8.8374	43.407	14.064	118.52
		0.1043	-9.2154	3.7536	11.485	19.479			0.1043	-8.879	45.433	14.3	120.06
		0.1044	-9.0921	4.1401	11.137	19.424			0.1044	-8.9447	46.854	14.687	121.3
		0.1045	-9.4697	4.2316	10.611	20.089			0.1045	-8.5773	49.009	14.968	121.74
		0.1046	-9.5487	4.3998	10.385	20.305			0.1046	-8.7132	51.313	14.223	122.41
		0.1047	-9.5837	4.4641	10.118	19.898			0.1047	-8.5533	53.373	13.609	123.8
		0.1048	-9.5142	4.5854	10.448	19.3			0.1048	-8.3286	55.903	13.596	124.67
		0.1049	-9.6304	5.4855	10.555	19.24			0.1049	-8.5664	58.165	13.2	124.83
		0.105	-9.9055	5.9885	10.107	19.993			0.105	-8.6059	59.779	13.087	125.18
		0.1051	-9.8865	5.575	10.354	19.919			0.1051	-8.4447	61.96	13.626	125.89
		0.1052	-9.798	5.6653	10.423	19.341			0.1052	-8.1767	63.951	12.817	125.99
		0.1053	-9.9529	5.9276	9.948	19.097			0.1053	-8.2091	65.134	11.938	125.53
		0.1054	-10.291	6.6653	9.975	19.065			0.1054	-7.963	66.702	12.176	125.06
		0.1055	-10.189	7.1003	10.059	19.489			0.1055	-7.7377	67.938	11.94	124.58
		0.1056	-10.036	7.0884	9.653	19.913			0.1056	-7.768	68.748	11.225	123.75
		0.1057	-10.417	7.4211	9.796	19.566			0.1057	-7.5753	69.352	11.006	122.1
		0.1058	-10.478	7.7167	10.039	19.243			0.1058	-7.6373	69.684	10.609	120.66
		0.1059	-10.522	7.8716	9.854	19.277			0.1059	-7.5133	70.297	11.087	119.53
		0.106	-10.779	7.8307	9.641	19.385			0.106	-6.8303	70.392	11.101	117.76
		0.1061	-10.783	8.3375	9.242	19.672			0.1061	-6.5415	69.623	9.852	115.61
		0.1062	-10.556	9.0533	9.12	19.554			0.1062	-7.2497	69.129	9.354	113.67
		0.1063	-10.731	9.0064	9.095	18.597			0.1063	-7.22	68.743	9.058	111.49
		0.1064	-10.887	8.8329	9.239	18.4733			0.1064	-6.9803	67.949	9.527	108.831
		0.1065	-11.03	8.9611	9.285	18.9772			0.1065	-7.1906	67.296	9.774	106.303
		0.1066	-11.02	8.5324	9.343	18.6766			0.1066	-6.7568	66.695	8.865	103.81
		0.1067	-10.783	8.138	9.479	18.6985			0.1067	-6.7018	65.442	8.204	102.006
		0.1068	-10.9	8.3267	9.59	18.8007			0.1068	-7.1954	63.719	8.918	100.361
		0.1069	-10.503	8.2431	9.474	17.9061			0.1069	-7.4637	63.121	9.692	98.012
		0.107	-10.724	8.2137	9.362	17.2837			0.107	-7.2788	62.163	9.271	96.211
		0.1071	-10.534	8.0889	9.838	17.5507			0.1071	-7.0954	60.05	9.889	94.716
		0.1072	-9.8878	7.4407	9.731	17.8304			0.1072	-7.4776	58.239	10.547	92.92
		0.1073	-10.093	7.3479	9.764	17.8799			0.1073	-8.0096	57.225	9.944	91.29
		0.1074	-10.226	7.5971	10.089	16.7223			0.1074	-7.9557	56.146	10.646	90.707
		0.1075	-10.028	7.1822	9.743	16.3427			0.1075	-7.509	54.661	11.462	91.06
		0.1076	-9.7693	7.0293	9.362	16.8702			0.1076	-7.9446	53.42	11.354	90.771
		0.1077	-9.4671	7.3862	9.002	16.5027			0.1077	-8.5656	51.852	11.489	89.688
		0.1078	-9.3725	7.3955	9.011	15.9758			0.1078	-8.6903	51.035	11.862	89.155
		0.1079	-9.749	6.9478	9.391	15.8702			0.1079	-8.6767	50.359	11.759	89.496
		0.108	-9.7944	7.1914	10.018	15.5902			0.108	-8.7692	49.022	11.723	89.769
		0.1081	-9.4858	7.6551	9.521	15.1383			0.1081	-9.1009	48.485	12.173	90.158
		0.1082	-9.1092	6.9749	8.558	14.9603			0.1082	-9.4949	48.339	12.771	90.965
		0.1083	-9.2245	7.0182	9.088	15.0317			0.1083	-9.7804	47.612	12.498	91.344
		0.1084	-9.7399	7.7216	9.111	15.1842			0.1084	-9.4782	47.812	12.103	91.567
		0.1085	-9.7714	8.0831	8.85	14.2685			0.1085	-9.3742	49.182	12.289	92.208
		0.1086	-9.3523	8.3409	9.092	13.7505			0.1086	-9.5484	50.859	12.187	93.164
		0.1087	-9.1251	8.4428	8.92	14.1022			0.1087	-9.806	51.953	12.279	93.705
		0.1088	-9.4694	8.7594	9.232	13.91			0.1088	-10.122	52.806	12.659	93.924
		0.1089	-10.049	9.3387	9.051	13.6812			0.1089	-10.141	54.388	13.302	93.939
		0.109	-10.538	9.9631	7.7636	13.6723			0.109	-10.02	56.048	12.743	94.059
		0.1091	-10.401	10.389	7.5494	13.5908			0.1091	-9.5322	58.401	11.588	94.657
		0.1092	-9.9288	10.877	7.8521	13.5978			0.1092	-9.3799	61.495	11.47	94.842
		0.1093	-10.556	11.525	8.023	14.1105			0.1093	-9.7182	64.559	11.959	94.204
		0.1094	-11.26	12.197	8.566	14.3226			0.1094	-10.368	67.105	12.268	93.608
		0.1095	-11.083	12.621	8.532	14.0496			0.1095	-10.178	69.292	11.645	93.574
		0.1096	-11.198	12.88	7.9642	14.3802			0.1096	-9.576	71.718	11.043	93.402
		0.1097	-11.529	13.223	7.3921	15.2269			0.1097	-9.4754	74.627	10.543	93.042
		0.1098	-11.674	14.046	7.2698	15.6367			0.1098	-9.3866	77.769	10.413	93.259
		0.1099	-11.789	14.654	7.7587	15.9904			0.1099	-9.5578	80.582	10.887	93.287
		0.11	-11.986	14.609	8.433	16.5509			0.11	-9.5821	82.71	11.314	92.563
		0.1101	-12.077	15.028	8.401	16.5861			0.1101	-9.2971	85.328	10.734	92.217
		0.1102	-12.219	15.582	8.146	17.1585			0.1102	-9.0338	88.053	10.303	92.365
		0.1103	-11.97	16.126	8.016	18.1913			0.1103	-9.1719	90.617	10.786	92.703
		0.1104	-11.987	16.333	7.6858	18.9616			0.1104	-8.9166	93.522	11.298	92.918
		0.1105	-12.466	16.286	7.7625	19.574			0.1105	-8.6598	95.119	11.364	93.11
		0.1106	-12.695	16.535	7.5553	20.021			0.1106	-8.98	96.46	11.272	93.644
		0.1107	-12.873	16.841	7.5241	20.892			0.1107	-8.7592	98.387	11.397	94.289
		0.1108	-12.581	16.732	7.7929	21.209			0.1108	-8.3676	100.13	11.27	94.766
		0.1109	-12.372	16.567	7.7543	21.331			0.1109	-8.7247	101.41	11.298	95.889
		0.111	-12.479	16.791	8.186	22.72			0.111	-8.8082	102.33	11.618	96.95
		0.1111	-12.414	16.726	8.223	23.728			0.1111	-8.375	103.11	12.035	97.891
		0.1112	-12.738	16.431	7.6035	23.854			0.1112	-8.4568	103.41	12.163	99.671
		0.1113	-12.647	16.245	7.9858	24.123			0.1113	-8.792	103.35	11.784	101.422
		0.1114	-12.604	16.02	8.408	24.851			0.1114	-8.6954	103.24	11.333	102.878
		0.1115	-12.627	15.821	8.124	25.453			0.1115	-8.622	103.17	11.881	104.772
		0.1116	-12.245	15.377	8.566	25.379			0.1116	-8.5655	102.54	12.426	106.609
		0.1117	-12.536	15.007	8.876	25.484			0.1117	-8.5667	101.23	12.063	108.654
		0.1118	-12.534	15.188	8.422	25.767			0.1118	-8.8751	100.04	11.922	110.9
		0.1119	-12.306	14.752	8.087	25.998			0.1119	-9.1313	99.336	11.807	112.97
		0.112	-11.939	14.136	8.179	26.368			0.112	-9.3736	98.43	12.096	114.76
		0.1121	-11.902	13.929	8.252	26.205			0.1121	-9.4362	96.375	12.117	115.76
		0.1122	-12.488	13.547	7.863	26.47			0.1122	-9.2674	94.361	11.724	116.85
		0.1123	-12.6	13.09	7.6373	26.682			0.1123	-9.408	92.917	11.807	118.35
		0.1124	-12.101	13.377	7.6994	26.255			0.1124	-9.6154	91.559	11.157	119.68
		0.1125	-11.717	13.399	7.6701	26.28			0.1125	-10.22	90.137	10.525	120.67
		0.1126	-11.861	12.373	7.6142	25.909			0.1126	-10.144	88.452	10.837	121.62
		0.1127	-12.444	11.831	7.2746	25.779			0.1127	-9.7841	86.605	10.865	121.72
		0.1128	-12.532	11.631	6.8581	25.888			0.1128	-9.921	84.918	10.586	121.3
		0.1129	-12.137	11.521	7.042	25.63			0.1129	-10.145	83.699	10.257	121.8
		0.113	-12.032	11.388	6.9599	25.666			0.113	-10.534	81.741	9.383	122
		0.1131	-12.035	11.041	7.2684	25.039			0.1131	-10.618	79.815	8.68	120.68
		0.1132	-12.008	10.803	7.6002	24.109			0.1132	-10.241	78.987	9.154	119.5
		0.1133	-11.908	10.58	6.5365	24.127			0.1133	-9.7059	77.997	9.784	118.74
		0.1134	-11.874	10.328	6.0586	23.845			0.1134	-9.8194	76.815	8.854	117.36
		0.1135	-12.04	9.9522	5.968	23.051			0.1135	-10.249	75.777	8.154	116.11
		0.1136	-12.014	9.4106	6.0536	22.765			0.1136	-10.372	75.272	8.396	114.8
		0.1137	-11.579	9.3638	6.864	22.406			0.1137	-9.892	75.041	8.482	112.67
		0.1138	-11.667	9.2382	7.0011	21.785			0.1138	-9.5072	74.197	8.842	110.46
		0.1139	-11.89	8.5623	6.5854	20.87			0.1139	-9.5268	73.552	8.864	108.451
		0.114	-11.784	8.4546	6.308	20.655			0.114	-9.8219	74.167	8.158	106.607
		0.1141	-11.857	8.3158	6.2167	20.975			0.1141	-9.5425	74.771	8.02	104.676
		0.1142	-11.936	8.3996	6.4954	20.073			0.1142	-9.163	74.766	8.652	102.903
		0.1143	-12.33	7.7499	6.9256	19.235			0.1143	-9.3981	74.879	9.057	101.647
		0.1144	-12.652	6.9745	7.103	19.21			0.1144	-9.8605	75.274	8.838	99.756
		0.1145	-12.303	6.6937	6.8636	18.8755			0.1145	-9.8495	76.481	9.099	97.424
		0.1146	-12.312	5.9498	6.9162	18.3182			0.1146	-9.5085	76.893	9.58	96.214
		0.1147	-12.813	5.5527	7.182	18.0143			0.1147	-9.1892	76.677	9.404	96.042
		0.1148	-12.55	5.6073	7.3304	17.7001			0.1148	-9.2934	77.541	8.862	96.172
		0.1149	-12.649	5.6528	7.7314	17.5121			0.1149	-9.8446	78.111	9.499	96.605
		0.115	-13.304	4.8944	7.5216	17.5573			0.115	-9.6498	78.834	10.54	96.883
		0.1151	-13.063	4.3171	6.9721	17.5178			0.1151	-9.5716	79.519	10.026	97.239
		0.1152	-12.841	3.8677	7.1117	17.254			0.1152	-10.021	79.048	9.801	97.888
		0.1153	-13.185	3.673	7.6575	17.3081			0.1153	-10.061	79.18	10.346	99.175
		0.1154	-13.377	3.9334	7.7516	17.629			0.1154	-9.9243	79.985	11.146	100.91
		0.1155	-13.524	3.3619	7.669	17.9766			0.1155	-9.9866	79.747	11.281	102.679
		0.1156	-13.827	3.1853	7.7098	18.385			0.1156	-10.218	79.633	10.964	105.004
		0.1157	-14.148	3.7331	7.6095	17.9043			0.1157	-10.654	79.948	10.873	107.213
		0.1158	-14.042	3.9265	8.145	17.9662			0.1158	-10.754	79.412	11.512	109.44
		0.1159	-13.963	3.6252	8.379	18.7228			0.1159	-10.922	78.522	11.91	111.77
		0.116	-14.366	3.2066	7.9025	18.7258			0.116	-11.485	78.069	11.294	113.89
		0.1161	-15.006	3.3416	7.6488	18.9339			0.1161	-11.581	78.111	11.124	115.52
		0.1162	-15.124	3.6359	7.392	19.229			0.1162	-11.35	77.178	11.352	117.43
		0.1163	-14.942	3.8216	7.774	19.511			0.1163	-11.77	76.478	11.617	119.92
		0.1164	-14.858	3.944	7.8474	19.809			0.1164	-11.766	76.282	12.065	122.65
		0.1165	-15.386	4.0714	7.0369	20.019			0.1165	-11.444	75.183	12.013	124.87
		0.1166	-15.864	3.9238	7.1901	20.554			0.1166	-11.987	73.711	11.683	126.25
		0.1167	-15.552	4.0605	7.5536	21.026			0.1167	-11.995	72.778	11.666	127.54
		0.1168	-15.529	4.7642	6.9443	21.532			0.1168	-11.834	72.537	11.225	128.52
		0.1169	-15.644	4.9525	6.4324	22.075			0.1169	-12.145	71.849	11.322	129.88
		0.117	-15.825	4.8843	6.3845	22.623			0.117	-12.284	71.139	12.009	130.77
		0.1171	-15.723	5.1007	6.2194	23.383			0.1171	-12.502	69.832	11.95	130.59
		0.1172	-15.964	5.2322	6.0757	23.42			0.1172	-12.431	68.749	11.681	130.76
		0.1173	-16.25	5.6965	6.1902	23.866			0.1173	-12.327	68.335	11.688	131.23
		0.1174	-16.246	6.3862	6.3999	24.865			0.1174	-12.507	67.339	11.584	131.04
		0.1175	-16.036	6.6232	6.2972	24.914			0.1175	-12.169	66.925	11.196	129.99
		0.1176	-15.68	6.2217	6.2541	24.911			0.1176	-12.132	65.951	11.263	128.7
		0.1177	-15.966	6.4017	6.2568	25.397			0.1177	-12.633	64.697	11.752	127.44
		0.1178	-16.697	6.7791	5.8209	25.653			0.1178	-12.444	64.866	11.417	125.97
		0.1179	-16.538	6.8765	5.898	26.007			0.1179	-11.982	64.862	11.504	125.17
		0.118	-15.864	7.2611	6.2429	26.39			0.118	-11.835	63.792	11.851	124.16
		0.1181	-15.761	6.9341	6.2766	26.607			0.1181	-11.648	62.844	11.42	122.29
		0.1182	-16.201	6.8839	5.9772	26.762			0.1182	-11.025	62.502	11.301	120.58
		0.1183	-16.399	7.3387	6.2693	27.02			0.1183	-10.825	62.391	11.665	118.74
		0.1184	-16.095	7.0487	7.0053	27.457			0.1184	-11.434	62.108	11.51	116.78
		0.1185	-15.882	6.8848	6.92	27.344			0.1185	-11.285	62.161	11.083	115.58
		0.1186	-15.617	7.1973	6.5221	27.329			0.1186	-10.554	62.371	11.134	114.4
		0.1187	-15.406	7.0701	6.8181	27.732			0.1187	-10.216	61.705	11.598	112.28
		0.1188	-15.58	6.914	7.0596	27.864			0.1188	-10.377	61.33	11.756	110.39
		0.1189	-15.737	6.9259	7.4237	27.606			0.1189	-10.481	61.901	10.971	108.823
		0.119	-15.496	6.8262	8.35	27.446			0.119	-10.523	61.652	10.639	107.862
		0.1191	-15.105	6.7561	8.283	27.739			0.1191	-10.554	60.861	10.825	107.06
		0.1192	-15.185	7.001	7.793	27.775			0.1192	-10.406	60.488	10.488	105.122
		0.1193	-15.302	6.4179	8.046	27.311			0.1193	-10.457	60.546	10.308	103.451
		0.1194	-15.209	5.9027	8.474	27.387			0.1194	-10.465	60.309	10.186	102.588
		0.1195	-15.242	6.2106	8.593	27.78			0.1195	-10.343	59.618	10.193	101.379
		0.1196	-14.9	5.9142	8.67	27.467			0.1196	-10.546	59.708	10.148	100.264
		0.1197	-14.788	5.9961	8.837	26.948			0.1197	-10.966	59.877	10.041	100.179
		0.1198	-14.861	6.3276	8.77	27.087			0.1198	-10.965	59.733	9.64	99.861
		0.1199	-15.099	6.3426	8.263	27.225			0.1199	-10.881	59.452	8.971	98.857
		0.12	-15.155	6.2109	8.161	27.344			0.12	-11.512	59.304	9.089	98.143
		0.1201	-14.884	6.0617	8.221	27.814			0.1201	-11.8	59.521	9.213	97.806
		0.1202	-14.351	6.085	8.02	27.953			0.1202	-11.639	59.805	10.039	98.03
		0.1203	-14.141	6.0515	8.148	27.687			0.1203	-11.967	60.258	10.182	98.176
		0.1204	-14.475	6.2299	8.089	27.849			0.1204	-12.509	60.447	9.383	97.701
		0.1205	-15.088	6.3854	7.66	28.266			0.1205	-12.849	60.469	8.932	97.224
		0.1206	-15.224	6.8868	7.7251	28.017			0.1206	-12.785	60.229	9.265	97.143
		0.1207	-14.632	7.2704	7.5358	28.549			0.1207	-13.309	60.624	9.71	97.194
		0.1208	-14.284	6.9438	6.8475	29.582			0.1208	-13.762	61.486	9.83	97.308
		0.1209	-14.465	7.0178	6.8281	29.833			0.1209	-13.881	61.352	10.318	96.974
		0.121	-14.632	7.3267	6.9623	29.969			0.121	-14.234	61.252	10.563	96.138
		0.1211	-14.414	7.3748	6.6403	30.525			0.1211	-14.976	61.615	10.469	95.776
		0.1212	-14.648	7.7062	6.2059	31.241			0.1212	-15.07	62.083	10.46	96.003
		0.1213	-14.429	7.943	5.5315	31.826			0.1213	-14.955	63.116	10.674	95.954
		0.1214	-14.208	8.222	5.4858	32.439			0.1214	-15.24	63.66	10.875	95.347
		0.1215	-13.771	8.3244	6.4095	33.322			0.1215	-15.219	64.04	11.565	94.51
		0.1216	-13.633	8.2962	6.191	34.322			0.1216	-15.802	64.83	11.133	93.86
		0.1217	-13.846	8.5777	4.9549	35.016			0.1217	-16.493	65.401	10.754	93.271
		0.1218	-13.483	8.438	4.9503	35.934			0.1218	-16.543	65.883	11.503	92.893
		0.1219	-13.027	8.675	5.157	37.001			0.1219	-16.458	67.083	12.037	92.93
		0.122	-12.715	8.5584	5.3129	37.589			0.122	-16.552	67.859	12.444	92.169
		0.1221	-12.709	8.2638	5.4189	38.128			0.1221	-16.628	67.799	12.047	90.69
		0.1222	-12.788	8.3294	5.4024	38.848			0.1222	-17.091	68.031	11.598	89.608
		0.1223	-12.801	8.0435	5.5679	39.864			0.1223	-17.455	68.373	12.145	89.335
		0.1224	-12.311	7.9001	5.6554	40.737			0.1224	-17.344	68.703	12.487	89.261
		0.1225	-11.627	7.8275	6.0954	41.251			0.1225	-17.268	68.312	12.47	88.736
		0.1226	-11.202	7.634	5.0652	41.712			0.1226	-17.521	67.971	12.627	87.232
		0.1227	-11.238	7.316	4.6144	41.897			0.1227	-17.871	68.02	12.533	86.132
		0.1228	-11.261	7.235	6.0106	42.605			0.1228	-17.534	67.991	12.445	86.094
		0.1229	-10.989	7.0676	6.548	43.182			0.1229	-17.467	67.624	13.03	85.802
		0.123	-10.671	7.0399	6.5772	43.1			0.123	-17.589	66.712	13.338	84.982
		0.1231	-10.179	6.656	6.6598	43.347			0.1231	-17.411	65.705	12.604	84.386
		0.1232	-9.5439	5.7573	6.7838	43.655			0.1232	-17.498	64.865	12.756	83.633
		0.1233	-9.6326	5.2882	6.8529	43.653			0.1233	-17.668	64.106	12.742	82.874
		0.1234	-9.7873	5.2165	6.5181	43.629			0.1234	-17.797	63.286	11.996	83.066
		0.1235	-9.4814	5.4096	6.7817	43.683			0.1235	-17.688	62.428	11.966	82.826
		0.1236	-9.4176	4.898	7.0988	43.406			0.1236	-17.529	61.767	12.082	82.334
		0.1237	-9.1813	4.1116	7.1715	42.759			0.1237	-17.336	61.289	12.079	82.289
		0.1238	-9.0054	3.8916	7.5895	42.45			0.1238	-17.475	60.99	11.705	82.258
		0.1239	-9.4831	4.2971	7.648	41.974			0.1239	-17.555	60.402	11.424	82.427
		0.124	-9.7207	3.9082	7.2935	41.604			0.124	-17.158	59.663	11.291	82.574
		0.1241	-9.2301	2.747	7.2224	41.413			0.1241	-17.115	59.357	11.431	82.919
		0.1242	-9.0846	3.1663	7.1463	41.017			0.1242	-17.241	59.401	11.26	83.604
		0.1243	-9.4239	3.717	6.6567	40.251			0.1243	-17.205	59.604	10.896	83.761
		0.1244	-9.7066	2.953	6.6474	39.119			0.1244	-17.064	60.13	11.068	83.814
		0.1245	-9.7138	2.6431	7.0884	38.632			0.1245	-16.671	60.875	11.093	84.481
		0.1246	-9.6077	3.0718	7.2683	38.46			0.1246	-16.458	61.396	11.445	85.582
		0.1247	-9.9909	3.2191	6.8272	38.013			0.1247	-16.593	62.09	10.983	86.799
		0.1248	-9.9652	2.7218	6.1489	37.29			0.1248	-17.204	63.234	10.075	87.556
		0.1249	-9.7093	2.4375	6.0342	36.759			0.1249	-17.443	64.534	9.919	87.983
		0.125	-10.395	2.5584	6.2782	36.377			0.125	-16.746	66.19	10.013	88.361
		0.1251	-10.911	2.4526	6.3796	35.713			0.1251	-16.452	67.883	9.901	89.332
		0.1252	-10.749	2.5924	6.0755	34.909			0.1252	-16.399	69.964	9.877	91.025
		0.1253	-10.197	2.871	5.7281	34.155			0.1253	-16.505	72.691	10.034	92.735
		0.1254	-10.382	2.7097	5.1568	33.549			0.1254	-16.918	74.633	9.361	93.635
		0.1255	-11.229	2.5975	5.4366	33.415			0.1255	-17.084	76.582	8.678	93.925
		0.1256	-11.431	2.5692	6.2479	33.794			0.1256	-17.092	79.289	9.016	95.177
		0.1257	-11.297	2.8165	5.9977	33.401			0.1257	-16.645	81.591	9.221	96.281
		0.1258	-11.07	3.2238	5.685	32.482			0.1258	-16.443	83.974	9.195	97.004
		0.1259	-10.999	3.3528	5.1417	31.947			0.1259	-17.022	86.186	9.348	97.939
		0.126	-11.316	3.8995	5.1272	31.453			0.126	-17.131	87.893	9.197	98.563
		0.1261	-11.042	3.89	5.6978	31.011			0.1261	-17.078	89.354	9.011	98.981
		0.1262	-10.571	3.3787	6.0074	31.312			0.1262	-17.47	90.433	8.807	99.033
		0.1263	-10.853	3.5619	6.675	31.738			0.1263	-17.695	92.183	8.784	99.666
		0.1264	-10.855	4.0091	6.5534	31.465			0.1264	-17.564	93.63	8.375	100.29
		0.1265	-10.413	4.2457	5.7469	31.059			0.1265	-17.664	94.259	8.198	100.221
		0.1266	-10.456	3.948	6.1451	30.731			0.1266	-18.066	94.363	8.309	99.836
		0.1267	-10.655	3.566	6.6938	30.743			0.1267	-18.43	94.655	7.5019	99.562
		0.1268	-10.08	4.095	6.766	30.813			0.1268	-18.753	95.428	7.5358	99.134
		0.1269	-9.6447	4.4822	7.0646	30.609			0.1269	-18.5	94.988	8.029	98.939
		0.127	-9.4483	4.1522	7.2163	30.461			0.127	-18.205	94.444	7.4575	99.001
		0.1271	-9.6049	3.8404	7.2991	30.874			0.1271	-18.711	93.822	6.9696	98.348
		0.1272	-9.9493	3.5485	7.6559	30.598			0.1272	-18.91	92.824	6.9241	97.969
		0.1273	-9.598	3.3935	7.8435	29.94			0.1273	-18.804	92.087	7.2996	97.483
		0.1274	-8.7662	4.2952	8.19	30.048			0.1274	-19.106	90.85	7.893	96.986
		0.1275	-8.2814	4.8444	8.263	30.122			0.1275	-19.083	89.042	7.8811	96.861
		0.1276	-8.7638	3.8692	8.096	29.877			0.1276	-19.159	87.171	7.7155	96.704
		0.1277	-8.7732	3.5523	8.601	29.703			0.1277	-19.228	85.559	7.5247	96.067
		0.1278	-8.5936	3.9039	8.718	29.922			0.1278	-18.975	83.997	7.7746	95.895
		0.1279	-8.4592	3.8962	8.719	29.559			0.1279	-19.027	82.219	8.102	95.979
		0.128	-8.0129	3.8118	8.906	28.935			0.128	-19.18	80.116	8.472	95.677
		0.1281	-8.1361	3.8541	8.904	28.755			0.1281	-18.968	78.042	8.55	95.666
		0.1282	-8.314	3.6545	8.877	28.495			0.1282	-18.803	76.412	8.253	95.623
		0.1283	-8.682	3.9845	9.031	28.323			0.1283	-18.515	75.019	8.712	95.428
		0.1284	-8.8608	4.7925	8.881	28.162			0.1284	-18.041	73.786	9.12	95.535
		0.1285	-8.588	5.2945	8.462	28.033			0.1285	-18.313	72.139	9.142	95.577
		0.1286	-8.6077	5.4852	8.721	27.869			0.1286	-18.758	70.856	9.063	95.457
		0.1287	-8.6187	6.1085	8.957	27.446			0.1287	-18.016	70.068	9.044	95.801
		0.1288	-9.0089	7.0665	9.139	27.142			0.1288	-17.219	69.271	9.068	96.104
		0.1289	-9.681	8.0012	8.877	26.807			0.1289	-17.417	68.17	9.488	96.33
		0.129	-9.8969	9.1591	8.14	26.541			0.129	-17.322	67.29	10.038	97.232
		0.1291	-9.9817	10.341	7.8759	26.226			0.1291	-17.082	67.162	10.31	97.986
		0.1292	-9.7967	11.408	7.94	25.959			0.1292	-17.218	67.086	10.077	97.949
		0.1293	-9.9819	12.345	8.193	25.868			0.1293	-16.679	66.776	9.852	98.321
		0.1294	-10.606	13.94	7.8399	26.178			0.1294	-16.354	66.798	10.301	98.876
		0.1295	-10.975	15.222	7.5467	26.244			0.1295	-16.617	67.295	10.052	99.249
		0.1296	-11.319	15.921	7.6826	25.645			0.1296	-16.297	67.191	9.28	99.943
		0.1297	-11.22	17.306	7.6853	25.073			0.1297	-16.153	67.074	9.376	100.031
		0.1298	-11.233	19.284	6.8612	24.733			0.1298	-16.171	67.108	9.93	99.675
		0.1299	-11.722	20.733	6.2745	24.572			0.1299	-15.758	67.781	9.927	99.795
		0.13	-11.975	21.91	6.3886	24.144			0.13	-15.627	68.685	9.471	100.175
		0.1301	-11.197	23.353	6.6888	24.069			0.1301	-15.647	68.359	8.37	99.979
		0.1302	-11.112	24.81	6.9804	24.37			0.1302	-15.942	67.897	7.8698	98.992
		0.1303	-11.788	26.277	6.5206	23.897			0.1303	-15.945	68.41	7.9513	98.663
		0.1304	-11.521	27.467	6.1592	23.476			0.1304	-15.617	68.861	7.4245	98.388
		0.1305	-11.627	29.28	6.5176	23.248			0.1305	-15.769	68.296	7.323	97.685
		0.1306	-11.764	30.549	6.272	22.435			0.1306	-16.075	67.609	7.1991	97.622
		0.1307	-11.121	31.013	5.6295	22.461			0.1307	-16.586	67.561	6.934	97.375
		0.1308	-10.451	31.915	5.8122	22.628			0.1308	-16.426	67.421	7.0027	96.577
		0.1309	-10.265	31.859	5.6743	22.631			0.1309	-16.095	66.821	6.5387	95.633
		0.131	-10.763	31.987	5.8	22.812			0.131	-16.721	66.517	5.9233	94.889
		0.1311	-10.967	33.258	5.4434	22.547			0.1311	-17.292	66.368	6.2501	94.68
		0.1312	-10.605	34.325	4.9628	21.941			0.1312	-17.232	65.583	6.2682	93.811
		0.1313	-9.9441	33.729	5.1894	21.61			0.1313	-16.86	64.774	5.8454	92.87
		0.1314	-9.1936	32.665	5.1868	21.184			0.1314	-17.19	64.24	5.2895	92.532
		0.1315	-8.9938	33.006	5.0359	20.892			0.1315	-17.558	63.683	5.2834	91.371
		0.1316	-9.0968	33.34	4.4905	21.151			0.1316	-17.187	63.288	5.4774	90.14
		0.1317	-9.2954	32.824	4.3527	21.528			0.1317	-16.933	62.472	5.9039	89.804
		0.1318	-9.202	32.187	4.3153	21.541			0.1318	-17.345	61.842	6.2305	89.448
		0.1319	-8.8365	31.841	4.4566	20.423			0.1319	-17.504	61.894	5.3245	88.84
		0.132	-8.7401	31.226	4.2201	20.114			0.132	-17.244	60.922	5.0235	88.236
		0.1321	-8.8802	30.854	3.5696	20.742			0.1321	-17.306	59.945	5.5982	87.324
		0.1322	-8.9843	29.925	3.7934	21.145			0.1322	-17.128	60.255	6.6012	87.392
		0.1323	-8.5676	28.4	4.0266	20.831			0.1323	-16.892	60.205	6.9547	88.965
		0.1324	-8.8279	27.654	3.8745	20.85			0.1324	-16.862	59.732	6.5815	90.635
		0.1325	-9.6605	26.97	3.5811	21.483			0.1325	-16.641	59.607	6.9213	91.685
		0.1326	-9.548	25.746	3.6053	21.524			0.1326	-16.339	59.656	7.065	92.072
		0.1327	-9.3436	24.395	3.8417	21.862			0.1327	-16.068	59.744	7.0674	93.079
		0.1328	-10.031	23.611	3.2204	22.144			0.1328	-16.043	59.493	7.892	94.97
		0.1329	-10.51	22.872	3.3645	22.445			0.1329	-15.744	59.942	8.208	97.444
		0.133	-10.03	21.809	3.989	22.466			0.133	-15.474	60.821	7.823	100.023
		0.1331	-9.9089	21.024	3.3024	22.474			0.1331	-15.24	60.201	7.9487	102.559
		0.1332	-10.691	20.135	3.3354	23.541			0.1332	-14.284	60.059	7.8042	104.445
		0.1333	-11.555	19.474	4.0159	24.267			0.1333	-13.92	60.877	8.033	106.198
		0.1334	-12.202	18.959	4.3189	24.127			0.1334	-13.889	60.984	8.226	108.847
		0.1335	-12.263	18.67	4.1547	24.295			0.1335	-14.022	61.517	7.2367	111.58
		0.1336	-11.882	18.028	3.3654	25.424			0.1336	-13.907	61.439	7.4199	114.2
		0.1337	-12.44	17.233	3.9558	26.327			0.1337	-13.422	61.194	8.389	117.02
		0.1338	-13.187	17.476	4.6177	26.566			0.1338	-13.382	61.341	8.322	119.61
		0.1339	-13.73	17.57	4.5025	26.51			0.1339	-13.182	61.364	7.8915	122.19
		0.134	-14.097	16.96	5.4524	26.58			0.134	-13.06	61.57	7.4446	125.02
		0.1341	-13.626	16.606	5.9147	26.773			0.1341	-13.286	61.411	7.0928	127.32
		0.1342	-13.451	16.639	5.7454	27.679			0.1342	-13.524	60.918	6.9675	130.01
		0.1343	-14.028	16.156	5.4129	28.505			0.1343	-13.514	60.236	7.456	132.49
		0.1344	-14.354	15.761	5.2876	28.254			0.1344	-13.137	60.146	7.4021	134.31
		0.1345	-14.194	16.061	5.691	27.552			0.1345	-13.408	59.878	6.4028	136.36
		0.1346	-14.092	16.17	6.2237	27.814			0.1346	-13.681	58.934	5.7054	138.1
		0.1347	-14.056	16.064	6.1991	28.413			0.1347	-13.689	58.249	5.9318	139.21
		0.1348	-13.977	15.886	6.0215	27.925			0.1348	-13.517	57.317	6.2322	139.74
		0.1349	-13.805	15.504	6.7509	27.531			0.1349	-13.408	56.445	5.8718	140.29
		0.135	-13.823	14.91	7.033	27.338			0.135	-14.165	56.222	5.4513	140.74
		0.1351	-14.034	14.765	6.2636	27.167			0.1351	-14.185	55.693	5.362	140.89
		0.1352	-13.686	15.008	6.3669	26.834			0.1352	-13.939	54.805	5.2693	140.9
		0.1353	-13.095	14.38	6.5989	26.93			0.1353	-14.221	53.997	5.2484	140.75
		0.1354	-13.155	14.058	6.6789	26.348			0.1354	-14.612	53.191	5.0757	139.95
		0.1355	-13.121	13.857	6.8085	25.067			0.1355	-15.098	52.076	4.9968	138.71
		0.1356	-12.801	12.837	6.4651	24.779			0.1356	-14.674	51.606	5.3107	137.89
		0.1357	-12.596	12.328	6.626	24.511			0.1357	-14.654	51.556	5.3608	137.18
		0.1358	-12.376	12.449	6.5207	23.822			0.1358	-15.269	51.094	5.6486	135.65
		0.1359	-12.228	11.596	6.6246	23.484			0.1359	-15.128	51.231	5.5231	133.54
		0.136	-12.011	10.846	6.3924	23.1			0.136	-15.206	52.857	5.1758	132.26
		0.1361	-12.045	10.365	5.7494	22.315			0.1361	-15.776	54.376	5.7674	130.91
		0.1362	-11.793	9.7295	5.9605	21.979			0.1362	-15.781	55.422	5.9119	128.91
		0.1363	-11.857	9.3827	6.0958	22.031			0.1363	-15.32	57.203	5.5314	126.95
		0.1364	-11.996	8.858	5.871	21.579			0.1364	-15.055	59.231	5.8104	125.42
		0.1365	-11.966	8.6102	5.8607	21.169			0.1365	-15.218	61.885	5.6081	123.55
		0.1366	-12.392	8.0203	5.6806	20.821			0.1366	-15.369	64.789	5.64	121.3
		0.1367	-12.533	7.1363	5.9392	20.56			0.1367	-15.188	68.188	6.2715	119.65
		0.1368	-12.516	6.9881	6.1864	20.492			0.1368	-15.181	72.07	6.1229	118.45
		0.1369	-12.355	7.1081	5.8844	20.479			0.1369	-15.052	75.734	5.6176	117.01
		0.137	-12.886	6.9627	6.0545	20.618			0.137	-14.67	79.227	5.9896	115.2
		0.1371	-13.454	6.766	5.7162	20.72			0.1371	-14.572	82.529	6.0337	113.6
		0.1372	-13.334	6.6031	5.1947	20.74			0.1372	-14.617	86.188	5.6355	112.7
		0.1373	-13.516	6.196	6.0094	20.667			0.1373	-14.254	90.642	5.7669	112.14
		0.1374	-13.708	5.7701	6.1765	20.858			0.1374	-13.964	94.93	5.8343	111.36
		0.1375	-13.502	6.1376	5.7353	20.981			0.1375	-14.131	99.011	5.5436	110.49
		0.1376	-13.49	6.682	5.6825	21.642			0.1376	-14.209	103.34	5.2609	109.95
		0.1377	-13.755	6.5255	5.6718	22.492			0.1377	-13.828	106.96	5.3967	109.79
		0.1378	-14.021	6.4384	6.0208	22.591			0.1378	-13.623	110.54	5.2462	109.4
		0.1379	-13.907	6.7664	6.0206	23.087			0.1379	-13.553	114.75	5.5369	109.12
		0.138	-13.551	6.8274	5.9325	23.294			0.138	-13.582	118.77	5.5929	109.15
		0.1381	-13.758	6.7825	5.9168	23.631			0.1381	-13.501	122.17	4.6793	109.19
		0.1382	-13.693	6.9678	6.4009	24.879			0.1382	-13.462	124.31	4.0536	109.01
		0.1383	-13.533	7.4944	6.8986	25.595			0.1383	-13.496	126.18	4.2103	108.647
		0.1384	-13.742	7.5494	6.5087	25.491			0.1384	-13.352	128.6	4.8165	108.762
		0.1385	-13.753	7.4502	6.2717	25.811			0.1385	-13.5	130.75	4.769	109.6
		0.1386	-13.213	8.0114	6.9665	26.742			0.1386	-13.534	131.89	4.0664	109.93
		0.1387	-13.049	8.2014	6.6841	27.387			0.1387	-13.351	131.78	4.0171	109.26
		0.1388	-13.564	7.9358	6.4097	27.866			0.1388	-13.228	131.79	4.4585	109.15
		0.1389	-13.556	7.7954	6.9502	28.355			0.1389	-13.244	131.84	4.59	109.17
		0.139	-13.411	8.0018	7.0425	28.263			0.139	-13.476	131.86	4.7542	109.12
		0.1391	-13.628	7.872	6.6603	28.395			0.1391	-13.437	131.5	4.5784	108.694
		0.1392	-13.224	7.8929	6.1874	29.218			0.1392	-13.346	129.87	4.4835	108.022
		0.1393	-12.897	8.2812	6.7731	29.726			0.1393	-13.206	127.97	4.3253	108.059
		0.1394	-13.099	7.8099	6.8669	30.311			0.1394	-13.33	126.12	4.2637	108.123
		0.1395	-12.78	7.203	6.0815	30.145			0.1395	-13.416	124.39	4.7854	108.22
		0.1396	-12.486	7.1243	6.2024	29.797			0.1396	-13.469	123.3	5.0227	107.388
		0.1397	-12.452	7.1415	6.7664	29.929			0.1397	-13.385	121.44	4.8303	106.134
		0.1398	-12.417	7.2521	6.5872	30.129			0.1398	-13.173	119.15	4.5348	105.797
		0.1399	-12.156	6.8434	6.1008	30.437			0.1399	-13.454	117.11	4.8905	105.531
		0.14	-12.287	6.7674	6.235	30.584			0.14	-13.321	114.86	5.821	105.338
		0.1401	-12.637	7.1399	6.6845	30.537			0.1401	-12.838	112.7	5.81	105.193
		0.1402	-12.263	6.7607	6.9382	30.101			0.1402	-12.653	111.33	5.3913	105.055
		0.1403	-11.486	6.6387	6.8458	29.695			0.1403	-12.76	109.92	5.5907	104.668
		0.1404	-11.458	6.5337	6.7782	30.339			0.1404	-12.704	107.94	5.7774	104.31
		0.1405	-12.068	6.523	6.6806	30.752			0.1405	-12.289	106.48	5.9303	104.399
		0.1406	-12.025	6.6026	6.8456	30.14			0.1406	-12.311	105.24	6.4381	104.32
		0.1407	-11.755	6.7671	7.2782	29.743			0.1407	-12.325	104.61	6.9911	104.245
		0.1408	-11.976	7.1025	7.3375	29.619			0.1408	-11.792	104.03	7.0602	104.195
		0.1409	-11.946	7.1262	7.4027	30.013			0.1409	-11.518	103.22	7.0563	104.216
		0.141	-11.565	7.7301	6.985	30.194			0.141	-11.526	102.89	6.7618	104.339
		0.1411	-11.35	7.9923	6.5402	29.825			0.1411	-11.937	102.62	6.7326	104.554
		0.1412	-11.353	8.085	7.133	29.721			0.1412	-11.655	103.2	7.1341	104.578
		0.1413	-10.936	8.827	7.8983	29.794			0.1413	-11.439	104.23	7.6027	104.723
		0.1414	-10.874	9.3807	7.9513	29.827			0.1414	-11.784	104.39	8.283	105.077
		0.1415	-11.299	9.7256	7.6436	29.568			0.1415	-11.718	105.1	8.478	105.296
		0.1416	-11.111	10.398	7.5859	29.316			0.1416	-11.582	106.51	8.014	105.367
		0.1417	-10.722	11.389	8.088	29.304			0.1417	-11.888	107.87	7.8183	105.952
		0.1418	-10.722	11.964	8.324	29.06			0.1418	-12.128	108.67	8.543	106.516
		0.1419	-10.66	12.351	8.276	28.888			0.1419	-11.82	109.45	8.796	106.618
		0.142	-10.614	12.954	8.415	28.993			0.142	-11.597	110.88	8.064	106.898
		0.1421	-11.256	13.618	8.534	28.781			0.1421	-11.703	111.91	7.9266	106.846
		0.1422	-11.143	14.014	8.405	28.587			0.1422	-12.007	112.35	8.141	106.778
		0.1423	-10.913	14.4	8.658	28.583			0.1423	-12.123	112.87	8.253	107.272
		0.1424	-11.366	15.27	8.928	28.469			0.1424	-12.137	113.18	8.254	107.752
		0.1425	-11.582	15.514	7.7783	28.068			0.1425	-12.372	113.6	7.8656	107.765
		0.1426	-11.663	15.362	7.1446	27.829			0.1426	-12.245	113.54	7.6014	107.694
		0.1427	-11.748	15.593	7.5412	28.357			0.1427	-12.303	112.93	8.315	107.629
		0.1428	-11.857	16.193	7.5443	28.55			0.1428	-12.803	112.54	8.219	107.391
		0.1429	-12.114	16.49	7.2036	28.36			0.1429	-13.035	111.9	7.6535	107.263
		0.143	-12.593	16.279	6.6159	28.115			0.143	-13.223	111.06	7.7394	107.416
		0.1431	-12.73	16.16	6.3536	27.732			0.1431	-13.255	109.61	7.2917	107.254
		0.1432	-12.232	15.927	6.211	27.423			0.1432	-13.409	108.14	7.5096	106.567
		0.1433	-12.372	16.062	5.8004	28.037			0.1433	-13.587	106.61	7.9975	106.294
		0.1434	-13.296	15.78	5.912	28.1			0.1434	-13.856	105.03	7.5396	105.855
		0.1435	-13.498	15.101	5.9558	27.649			0.1435	-14.179	103.6	6.8009	105.452
		0.1436	-13.364	14.807	5.5373	27.909			0.1436	-14.232	101.75	6.3694	105.076
		0.1437	-13.692	14.603	4.882	27.865			0.1437	-14.243	99.931	6.1077	104.386
		0.1438	-14.163	14.784	5.0325	27.945			0.1438	-14.202	97.323	5.8425	104.422
		0.1439	-14.387	14.397	5.4334	27.397			0.1439	-13.884	95.228	5.8465	104.771
		0.144	-14.548	13.446	4.9579	27.35			0.144	-14.117	94.187	6.0661	105.222
		0.1441	-14.647	12.832	4.7575	27.727			0.1441	-14.841	92.817	5.4864	105.102
		0.1442	-14.835	13.008	4.7242	27.678			0.1442	-15.002	91.003	4.7909	105.233
		0.1443	-14.991	13.14	4.7037	27.828			0.1443	-14.901	88.839	4.6225	105.719
		0.1444	-14.95	12.586	4.9426	27.659			0.1444	-14.918	87.087	4.7182	105.975
		0.1445	-15.317	12.322	5.0619	27.869			0.1445	-14.919	85.918	4.8395	107.415
		0.1446	-15.395	12.094	4.8882	28.004			0.1446	-15.109	85.1	4.4405	108.648
		0.1447	-15.107	12.231	5.0799	27.973			0.1447	-15.644	84.031	4.3248	109.37
		0.1448	-14.96	12.527	5.3115	28.673			0.1448	-15.574	82.886	4.512	110.78
		0.1449	-14.979	12.713	5.4021	29.161			0.1449	-15.638	82.231	4.0827	111.94
		0.145	-14.813	12.847	5.5488	28.79			0.145	-15.829	81.755	3.5498	113.12
		0.1451	-14.393	12.931	5.7145	28.733			0.1451	-15.716	81.567	3.5895	114.43
		0.1452	-14.206	13.156	6.1052	29.304			0.1452	-16.057	81.383	4.0999	115.8
		0.1453	-14.122	12.984	6.2938	30.181			0.1453	-16.455	80.697	4.378	117.43
		0.1454	-13.99	13.251	6.3331	30.883			0.1454	-15.99	80.505	3.845	119.78
		0.1455	-13.574	14.199	6.9391	31.275			0.1455	-15.966	81.345	3.3398	121.39
		0.1456	-13.074	14.825	6.8147	31.578			0.1456	-16.375	81.542	3.981	122.89
		0.1457	-13.06	14.847	6.7873	31.879			0.1457	-16.464	81.626	4.8205	125.22
		0.1458	-12.982	14.917	7.1127	32.453			0.1458	-16.674	82.194	4.5992	127.05
		0.1459	-12.652	15.528	6.869	32.658			0.1459	-16.661	82.093	4.164	128.52
		0.146	-12.431	15.902	6.6306	33.363			0.146	-16.959	82.257	3.9633	130.18
		0.1461	-12.153	16.03	6.9737	34.247			0.1461	-17.093	83.028	4.8886	132.2
		0.1462	-12.177	16.143	7.3958	34.015			0.1462	-17.003	83.628	5.8516	133.25
		0.1463	-12.053	16.441	6.8021	34.762			0.1463	-16.858	83.119	6	133.98
		0.1464	-12.232	16.949	6.3832	35.667			0.1464	-16.982	82.652	6.2543	135.5
		0.1465	-12.497	16.93	6.0332	36.008			0.1465	-17.693	82.784	6.4553	136.52
		0.1466	-12.234	16.861	6.2151	36.459			0.1466	-17.765	82.7	6.5775	136.7
		0.1467	-12.188	16.83	6.2424	36.605			0.1467	-17.496	82.812	6.7768	137.35
		0.1468	-12.109	16.836	5.7536	36.775			0.1468	-17.321	82.572	7.2308	138.01
		0.1469	-11.901	17.082	5.3972	37.439			0.1469	-17.302	82.193	7.8244	137.7
		0.147	-12.066	16.691	5.1184	38.162			0.147	-17.78	81.798	8.059	137.3
		0.1471	-12.556	16.242	4.9218	38.103			0.1471	-18.379	80.946	8.014	137.85
		0.1472	-12.932	16.726	4.4041	37.515			0.1472	-18.515	79.756	8.113	137.94
		0.1473	-12.771	16.652	4.4924	37.019			0.1473	-18.066	79.106	8.454	137.01
		0.1474	-12.808	15.817	4.5438	37.512			0.1474	-17.941	78.856	8.769	136.03
		0.1475	-13.013	15.513	4.324	38.237			0.1475	-18.104	78.127	8.743	135.2
		0.1476	-12.876	14.715	3.7971	37.951			0.1476	-18.466	77.239	8.491	134.64
		0.1477	-13.732	14.239	2.99	37.397			0.1477	-18.708	76.201	8.74	133.62
		0.1478	-14.363	14.797	2.4152	36.942			0.1478	-18.547	75.22	8.771	132.67
		0.1479	-14.116	14.815	2.2374	36.837			0.1479	-18.548	74.718	9.243	131.9
		0.148	-14.32	14.16	2.5939	36.76			0.148	-18.488	73.889	9.982	130.53
		0.1481	-15.042	14.211	2.5064	36.652			0.1481	-18.839	72.681	9.286	129.18
		0.1482	-14.983	14.51	1.6039	36.613			0.1482	-18.919	72.257	8.709	128.03
		0.1483	-14.821	13.854	0.4141	36.097			0.1483	-18.423	71.896	9.027	126.74
		0.1484	-15.064	13.843	0.8675	36.267			0.1484	-18.423	71.034	9.727	126.21
		0.1485	-14.935	14.418	1.6315	36.088			0.1485	-18.969	70.502	10.282	125.28
		0.1486	-14.981	15.019	0.7529	35.685			0.1486	-19.203	70.395	9.839	123.97
		0.1487	-14.859	15.911	0.2569	35.871			0.1487	-18.847	70.507	9.322	123.43
		0.1488	-14.454	16.278	0.4404	35.43			0.1488	-19.214	70.323	9.819	122.87
		0.1489	-14.698	16.049	0.4827	34.983			0.1489	-19.64	69.554	9.25	122.29
		0.149	-14.878	16.47	0.3015	34.928			0.149	-19.095	69.425	8.789	121.84
		0.1491	-14.361	17.784	0.2632	34.786			0.1491	-19.191	69.942	9.484	121.53
		0.1492	-14.137	18.616	0.2525	34.577			0.1492	-19.411	70.559	9.807	120.74
		0.1493	-13.998	18.976	-0.215	34.774			0.1493	-19.152	70.357	9.521	120.53
		0.1494	-13.797	20.162	-0.1708	34.77			0.1494	-19.556	69.778	8.911	121.29
		0.1495	-14.121	21.712	-0.1616	34.559			0.1495	-19.825	70.295	8.688	121.32
		0.1496	-14.165	22.705	-0.0135	34.353			0.1496	-19.454	71.001	8.995	121.04
		0.1497	-13.537	23.516	-0.0139	34.376			0.1497	-19.314	71.137	9.044	121.69
		0.1498	-13.202	25.143	-0.6011	34.612			0.1498	-19.215	71.302	9.102	122.01
		0.1499	-12.828	27.001	-0.6634	34.726			0.1499	-18.845	71.276	9.775	121.84
		0.15	-12.942	27.482	-0.3556	34.188			0.15	-19.06	71.097	9.915	122.18
		0.1501	-13.399	28.476	-0.0819	33.978			0.1501	-19.03	71.356	9.893	122.74
		0.1502	-12.81	29.87	-0.2083	34.673			0.1502	-18.985	71.633	10.162	123.12
		0.1503	-12.232	30.78	-0.6744	35.264			0.1503	-19.271	71.521	9.897	123.31
		0.1504	-12.054	32	-0.7389	34.898			0.1504	-18.729	70.561	9.918	123.52
		0.1505	-12.253	32.995	-0.6553	34.397			0.1505	-18.319	70.074	10.688	123.91
		0.1506	-12.029	33.401	-0.6574	34.154			0.1506	-18.453	70.183	11.062	124.4
		0.1507	-11.66	33.8	-0.1979	33.758			0.1507	-18.03	69.769	10.817	124.45
		0.1508	-12.025	34.67	-0.0504	33.943			0.1508	-17.868	69.36	10.981	123.99
		0.1509	-11.947	35.534	-0.1321	33.99			0.1509	-17.852	68.936	11.095	124.12
		0.151	-11.753	35.898	-0.3351	33.336			0.151	-17.933	67.95	10.641	124.38
		0.1511	-11.886	36.172	-0.0616	32.898			0.1511	-17.989	67.142	11.098	124.77
		0.1512	-11.634	36.522	0.1895	32.857			0.1512	-17.384	66.393	11.496	124.95
		0.1513	-11.526	37.189	0.1098	32.383			0.1513	-16.938	65.671	11.619	124.92
		0.1514	-11.521	37.495	0.5103	32.064			0.1514	-16.731	65.579	12.509	124.89
		0.1515	-11.499	37.045	0.7727	31.586			0.1515	-16.899	64.939	12.251	124.61
		0.1516	-11.494	36.944	1.4041	31.312			0.1516	-16.732	64.158	11.778	124.44
		0.1517	-11.227	36.798	2.008	31.064			0.1517	-16.349	63.673	12.234	124.15
		0.1518	-11.078	36.566	1.838	30.836			0.1518	-16.291	63.158	12.656	124.57
		0.1519	-10.826	36.467	2.5848	30.936			0.1519	-16.489	62.629	13.057	124.51
		0.152	-10.742	36.488	3.1086	31.188			0.152	-16.656	62.475	12.959	124.01
		0.1521	-10.616	35.768	2.8054	31.287			0.1521	-16.505	62.061	12.831	124.16
		0.1522	-10.487	34.662	3.5556	30.987			0.1522	-16.351	61.606	12.821	123.91
		0.1523	-10.24	34.214	4.2436	31.312			0.1523	-16.385	62.026	12.668	123.35
		0.1524	-9.9039	33.704	4.5816	32.849			0.1524	-16.549	61.993	12.724	123.63
		0.1525	-9.7097	33.471	5.3204	33.245			0.1525	-17.065	61.826	12.56	124.43
		0.1526	-9.4297	33.229	5.5885	33.197			0.1526	-17.302	62.365	12.291	123.84
		0.1527	-9.071	32.325	5.2259	34.041			0.1527	-17.474	62.619	12.044	123.09
		0.1528	-9.137	31.651	5.5923	35.216			0.1528	-18.028	62.229	12.109	123.91
		0.1529	-9.0946	30.98	6.6031	36.754			0.1529	-18.019	62.144	12.389	124.23
		0.153	-8.6959	30.602	7.1522	37.5			0.153	-17.934	62.726	11.803	124.07
		0.1531	-8.5644	29.906	7.1493	38.89			0.1531	-18.621	63.317	11.548	124.23
		0.1532	-8.364	29.201	6.7079	40.461			0.1532	-19.378	63.547	11.674	124.44
		0.1533	-8.1898	28.657	6.8484	41.859			0.1533	-19.497	63.661	11.355	124.77
		0.1534	-8.4214	28.371	7.3817	43.897			0.1534	-19.682	63.892	11.486	124.66
		0.1535	-8.8512	28.598	7.5733	45.488			0.1535	-20.295	63.609	11.579	124.9
		0.1536	-8.6863	28.259	8.112	47.066			0.1536	-20.39	63.36	11.439	125.19
		0.1537	-8.4784	28.247	7.7723	49.019			0.1537	-20.517	63.755	11.184	125.29
		0.1538	-8.3703	28.646	7.0432	51.013			0.1538	-21.152	64.004	11.015	125.72
		0.1539	-8.7053	29.71	7.4843	52.879			0.1539	-22.006	63.791	11.323	126.19
		0.154	-9.3548	30.713	7.7583	54.744			0.154	-22.469	63.692	11.341	126.07
		0.1541	-9.4262	31.451	7.4322	57.002			0.1541	-22.289	63.884	11.549	125.97
		0.1542	-9.547	32.212	7.0521	58.983			0.1542	-22.656	63.227	11.874	126.79
		0.1543	-9.6423	32.882	6.8264	60.561			0.1543	-23.184	62.969	11.656	127.29
		0.1544	-9.8049	33.952	6.7231	62.052			0.1544	-23.518	63.006	11.494	127.27
		0.1545	-9.9827	35.736	6.2783	63.761			0.1545	-23.773	62.351	11.96	127.49
		0.1546	-10.677	37.621	6.2251	65.958			0.1546	-23.91	62.2	12.731	127.66
		0.1547	-11.342	39.032	6.1265	67.867			0.1547	-24.11	61.987	12.682	128.05
		0.1548	-11.872	40.63	5.9467	68.685			0.1548	-24.067	61.415	12.572	128.42
		0.1549	-12.215	41.361	5.7434	69.706			0.1549	-24.529	60.889	12.696	128.77
		0.155	-12.237	42.162	4.7253	71.384			0.155	-24.871	61.151	12.87	128.98
		0.1551	-12.612	43.61	5.144	72.62			0.1551	-24.745	61.161	13.558	129.07
		0.1552	-13.081	45.276	5.7079	73.501			0.1552	-24.725	60.683	13.962	129.86
		0.1553	-13.617	47.267	4.6604	74.603			0.1553	-24.68	60.367	14.517	129.72
		0.1554	-14.092	48.841	4.2626	75.789			0.1554	-24.449	59.881	14.633	129.33
		0.1555	-14.059	50.225	4.3541	76.334			0.1555	-24.499	60.186	14.385	129.77
		0.1556	-13.994	51.246	3.9185	76.731			0.1556	-24.511	60.667	14.889	130.37
		0.1557	-13.82	51.779	3.4336	76.999			0.1557	-24.265	60.888	15.306	130.38
		0.1558	-13.57	53.058	3.3547	76.916			0.1558	-24.281	60.534	15.976	129.99
		0.1559	-13.687	54.758	4.0166	77.672			0.1559	-24.253	60.179	16.501	129.96
		0.156	-13.86	55.601	4.2958	78.622			0.156	-24.128	60.836	16.838	129.85
		0.1561	-13.562	55.949	4.0577	79.344			0.1561	-23.616	61.093	16.814	129.94
		0.1562	-12.957	55.956	3.8248	79.23			0.1562	-23.611	60.79	16.741	130.61
		0.1563	-12.873	56.097	3.9068	78.442			0.1563	-23.487	61.07	17.105	130.77
		0.1564	-12.804	56.645	3.7374	78.429			0.1564	-23.409	61.26	17.713	129.98
		0.1565	-12.641	56.572	3.4596	78.726			0.1565	-23.649	61.049	17.443	129.28
		0.1566	-12.292	55.67	3.9919	79.007			0.1566	-23.584	61.312	17.025	129.54
		0.1567	-12.008	55.052	4.4105	79.115			0.1567	-23.171	61.833	16.949	129.7
		0.1568	-11.905	54.843	4.9386	79.138			0.1568	-22.868	61.659	16.743	129.35
		0.1569	-11.822	54.444	4.8638	78.99			0.1569	-22.857	61.801	16.892	129.59
		0.157	-11.459	53.557	4.3363	79.086			0.157	-22.782	62.257	16.721	129.31
		0.1571	-10.938	52.523	4.9468	78.943			0.1571	-22.999	62.094	16.457	128.48
		0.1572	-10.641	51.509	5.2271	78.692			0.1572	-23.108	62.082	16.103	128.24
		0.1573	-10.426	50.267	5.0937	78.873			0.1573	-22.504	62.175	16.062	128.39
		0.1574	-10.418	49.629	5.5841	79.267			0.1574	-21.829	62.463	16.133	127.78
		0.1575	-10.057	48.628	5.771	79.367			0.1575	-21.609	63.088	15.769	126.84
		0.1576	-9.822	47.117	5.9205	79.281			0.1576	-21.561	63.112	15.418	126.58
		0.1577	-9.7775	45.901	6.4357	79.23			0.1577	-21.617	62.442	15.279	126.45
		0.1578	-9.6955	44.973	6.8574	79.516			0.1578	-21.23	61.968	14.639	126.27
		0.1579	-10.082	43.719	7.0995	79.716			0.1579	-20.842	62.493	14.293	126.2
		0.158	-10.367	42.73	7.2974	79.455			0.158	-20.705	63.258	14.178	125.51
		0.1581	-10.24	41.408	6.8459	79.404			0.1581	-20.189	63.028	13.798	124.48
		0.1582	-10.27	40.011	6.6071	79.599			0.1582	-19.661	62.351	13.606	124.18
		0.1583	-10.465	39.332	7.0056	79.125			0.1583	-19.653	62.047	13.526	123.97
		0.1584	-10.79	38.223	7.3199	78.555			0.1584	-19.379	62.559	13.751	123.93
		0.1585	-11.225	37.872	7.3577	78.829			0.1585	-19.062	63.034	13.571	123.8
		0.1586	-11.27	37.203	7.2595	78.724			0.1586	-18.719	63.349	12.929	123.36
		0.1587	-11.424	36.257	7.0421	78.447			0.1587	-18.378	63.468	12.769	123.1
		0.1588	-11.609	35.989	7.7563	78.299			0.1588	-18.595	63.378	12.844	123.05
		0.1589	-11.715	35.701	8.376	77.599			0.1589	-18.425	63.849	13.57	122.47
		0.159	-11.98	35.462	7.5574	77.036			0.159	-17.842	64.649	14.008	122.03
		0.1591	-11.894	35.942	7.1664	77.311			0.1591	-17.431	65.446	13.816	122.68
		0.1592	-11.873	36.077	7.4363	76.695			0.1592	-17.426	65.979	14.011	122.48
		0.1593	-11.901	35.584	7.7654	76.018			0.1593	-17.54	66.811	14.164	121.98
		0.1594	-12.363	35.909	8.292	76.187			0.1594	-17.314	67.458	14.684	121.87
		0.1595	-12.481	36.322	8.724	76.467			0.1595	-17.297	67.937	14.441	121.9
		0.1596	-12.12	36.555	8.591	76.067			0.1596	-17.465	68.686	14.367	122.32
		0.1597	-12.044	36.665	8.025	75.232			0.1597	-16.929	69.491	15.347	122.3
		0.1598	-11.975	37.176	7.6722	75.358			0.1598	-17.001	70.442	15.775	121.97
		0.1599	-11.891	37.461	7.6675	75.185			0.1599	-17.63	71.046	15.897	122.14
		0.16	-11.858	36.981	8.033	74.831			0.16	-17.116	71.563	16.067	122.69
		0.1601	-12.119	37.033	8.223	74.888			0.1601	-17.108	72.244	15.708	122.95
		0.1602	-12.12	37.442	8.081	75.174			0.1602	-17.979	73.172	15.609	122.87
		0.1603	-11.924	37.758	8.024	75.473			0.1603	-18.316	74.469	16.482	122.88
		0.1604	-11.515	37.652	8.029	75.21			0.1604	-18.243	74.818	17.31	122.78
		0.1605	-11.569	37.271	7.8276	75.328			0.1605	-18.231	74.464	17.665	122.86
		0.1606	-11.612	37.085	7.616	75.3			0.1606	-18.773	74.941	17.351	123.79
		0.1607	-11.346	37.18	7.6079	74.809			0.1607	-19.367	75.773	16.788	124.4
		0.1608	-11.371	37.074	7.5965	75.168			0.1608	-19.489	76.507	16.481	124.09
		0.1609	-11.757	36.732	7.8618	75.631			0.1609	-19.757	77.01	17.043	123.87
		0.161	-11.687	36.234	7.7302	75.473			0.161	-19.819	77.084	17.422	123.81
		0.1611	-11.606	36.277	7.6348	75.494			0.1611	-19.735	77.08	17.25	124.07
		0.1612	-11.848	36.495	7.9938	75.668			0.1612	-20.381	76.854	17.379	124.68
		0.1613	-11.91	35.702	8.162	75.881			0.1613	-20.887	76.755	17.284	125.17
		0.1614	-11.926	34.882	7.7135	75.922			0.1614	-21.001	76.837	17.292	124.91
		0.1615	-12.186	34.706	7.3674	75.709			0.1615	-21.136	77.08	17.048	124.38
		0.1616	-12.717	34.638	7.4216	75.598			0.1616	-21.412	77.641	16.958	124.43
		0.1617	-13.165	34.004	7.5215	75.382			0.1617	-21.884	77.121	17.14	125.2
		0.1618	-13.226	33.412	7.4853	75.354			0.1618	-21.876	76.975	16.912	125.29
		0.1619	-13.233	33.809	6.9994	75.182			0.1619	-22.083	77.2	16.631	125.4
		0.162	-13.833	33.147	7.0999	74.35			0.162	-22.493	76.741	16.631	126.95
		0.1621	-14.474	31.93	7.0642	74.21			0.1621	-22.689	77.136	16.999	128.16
		0.1622	-14.837	31.95	6.8742	73.873			0.1622	-23.172	77.09	16.827	128.5
		0.1623	-14.854	31.843	6.6412	72.659			0.1623	-23.459	77.045	16.423	129.3
		0.1624	-15.034	31.332	6.1182	72.232			0.1624	-23.221	77.779	16.778	130.88
		0.1625	-15.425	31.725	6.6618	71.765			0.1625	-23.277	78.013	16.711	132.29
		0.1626	-15.769	31.824	7.1301	71.027			0.1626	-23.7	77.918	16.265	133.44
		0.1627	-16.065	30.956	6.8183	70.087			0.1627	-23.519	78.197	16.423	135.48
		0.1628	-16.185	31.143	6.7507	68.829			0.1628	-23.563	78.861	16.43	138.01
		0.1629	-16.461	31.849	6.1087	68.41			0.1629	-23.925	79.409	16.657	139.72
		0.163	-16.942	32.004	5.9437	68.114			0.163	-23.613	79.952	17.242	141.21
		0.1631	-16.973	31.792	6.163	66.87			0.1631	-23.702	80.476	17.651	142.73
		0.1632	-16.881	32.151	6.2285	65.538			0.1632	-24.19	80.808	18.309	144.43
		0.1633	-16.721	32.598	6.6752	64.727			0.1633	-24.515	81.473	18.463	146.71
		0.1634	-16.657	32.988	5.724	64.134			0.1634	-24.082	82.318	18.135	149.22
		0.1635	-17.307	33.988	4.4766	63.402			0.1635	-24.081	82.683	18.761	151.39
		0.1636	-17.62	34.434	4.3526	62.422			0.1636	-24.938	83.044	19.82	153.55
		0.1637	-17.054	34.628	4.5366	61.611			0.1637	-25.209	83.58	20.758	155.54
		0.1638	-16.634	35.105	4.4647	60.816			0.1638	-25.446	84.108	21.258	157.62
		0.1639	-16.29	35.719	4.1175	59.849			0.1639	-25.673	84.402	21.76	159.92
		0.164	-16.116	37	3.2997	59.417			0.164	-26.034	84.644	22.297	161.59
		0.1641	-16.054	37.735	2.7801	59.238			0.1641	-26.51	85.495	22.107	163.23
		0.1642	-15.961	37.732	2.5822	59.065			0.1642	-26.747	85.971	22.468	165.37
		0.1643	-15.754	38.182	2.9695	58.352			0.1643	-26.804	85.846	23.307	166.71
		0.1644	-15.553	38.757	2.9818	57.517			0.1644	-27.102	86.43	23.82	167.04
		0.1645	-15.839	39.473	1.8396	57.41			0.1645	-27.353	87.391	24.23	167.65
		0.1646	-15.564	39.843	0.9906	58.075			0.1646	-28.047	87.399	24.455	169
		0.1647	-15.142	40.036	0.7684	58.113			0.1647	-28.416	87.272	24.665	169.86
		0.1648	-15.047	40.564	0.5683	57.534			0.1648	-28.225	87.59	25.211	170
		0.1649	-14.995	41.119	0.235	57.645			0.1649	-28.835	87.866	25.528	170.32
		0.165	-15.131	41.074	-0.5591	57.488			0.165	-29.229	88.155	25.457	170.76
		0.1651	-15.195	40.693	-1.27258	57.349			0.1651	-29.423	88.041	25.631	171.31
		0.1652	-15.185	40.94	-1.11311	57.686			0.1652	-29.939	87.777	25.822	171.7
		0.1653	-15.457	41.334	-1.56219	58.174			0.1653	-30.076	87.598	26.445	171.2
		0.1654	-15.429	41.473	-2.57824	58.093			0.1654	-30.288	87.581	26.748	170.65
		0.1655	-14.635	41.471	-2.40415	57.93			0.1655	-30.884	87.615	26.008	171.09
		0.1656	-14.746	40.983	-2.52203	58.566			0.1656	-30.988	87.731	25.466	171.32
		0.1657	-15.392	40.745	-3.1356	58.849			0.1657	-30.764	87.341	25.462	170.62
		0.1658	-15.725	41.068	-3.0242	58.849			0.1658	-31.146	87.357	25.489	169.99
		0.1659	-15.787	40.668	-2.42513	59.283			0.1659	-31.181	87.75	25.295	170.25
		0.166	-15.856	39.734	-2.14633	59.651			0.166	-31.1	87.592	24.454	170.3
		0.1661	-16.403	39.41	-2.64896	59.83			0.1661	-31.487	87.37	23.71	169.62
		0.1662	-16.706	39.181	-2.90098	59.923			0.1662	-31.254	87.386	23.824	168.91
		0.1663	-16.85	38.5	-2.43054	60.674			0.1663	-31.232	88.128	23.727	168.34
		0.1664	-17.085	37.768	-2.10093	61.221			0.1664	-31.38	88.454	22.955	168.28
		0.1665	-17.714	37.33	-1.90748	61.214			0.1665	-31.442	87.997	22.002	168.41
		0.1666	-18.238	37.097	-1.43043	61.671			0.1666	-31.667	87.944	21.868	168.51
		0.1667	-18.416	36.503	-1.43789	61.992			0.1667	-31.578	88.413	21.997	168.39
		0.1668	-17.955	35.937	-0.9669	62.31			0.1668	-31.779	88.264	21.265	168.12
		0.1669	-17.671	35.285	-0.74	62.922			0.1669	-32.142	88.627	20.11	168.38
		0.167	-18.417	35.141	0.0917	63.405			0.167	-32.221	89.371	20.179	168.71
		0.1671	-19.038	35.099	1.7727	63.585			0.1671	-32.223	89.561	20.215	168.77
		0.1672	-18.771	33.976	1.7142	64.267			0.1672	-32.09	89.707	19.244	169.05
		0.1673	-18.513	32.655	1.3209	64.653			0.1673	-32.037	89.77	18.344	169.15
		0.1674	-18.875	32.691	2.1236	65.163			0.1674	-32.279	90.203	17.342	168.93
		0.1675	-19.117	33.058	3.3088	66.179			0.1675	-32.446	90.587	17.241	169.22
		0.1676	-19.158	32.59	4.2086	66.65			0.1676	-32.227	91.109	17.527	168.97
		0.1677	-18.998	31.893	4.2885	67.183			0.1677	-31.837	91.626	16.564	168.57
		0.1678	-19.232	31.42	4.3653	67.766			0.1678	-31.843	91.98	15.837	168.54
		0.1679	-19.24	31.191	4.9631	68.216			0.1679	-32.098	92.023	15.631	168.3
		0.168	-19.369	31.22	5.0244	68.848			0.168	-32.175	92.259	15.341	168.12
		0.1681	-19.95	31.652	5.1247	69.938			0.1681	-32.315	92.818	15.619	167.67
		0.1682	-19.786	31.702	5.754	70.502			0.1682	-32.55	93.383	15.872	166.65
		0.1683	-19.37	31.469	6.2808	70.319			0.1683	-32.699	94.197	15.39	165.8
		0.1684	-19.291	31.711	5.9717	70.36			0.1684	-32.647	94.373	15.106	165.19
		0.1685	-19.183	32.596	5.493	70.814			0.1685	-32.718	94.352	15.491	164.07
		0.1686	-18.925	33.485	5.7809	71.465			0.1686	-33.207	94.958	15.891	163.13
		0.1687	-18.898	33.727	6.2081	71.959			0.1687	-33.037	96.054	16.772	161.96
		0.1688	-19.156	33.942	5.9366	71.853			0.1688	-32.857	96.79	16.489	160.63
		0.1689	-19.373	34.575	5.6124	71.96			0.1689	-33.223	96.949	15.883	159.35
		0.169	-19.097	35.006	5.0448	72.026			0.169	-33.217	97.662	16.639	157.97
		0.1691	-18.789	35.819	3.9771	71.968			0.1691	-32.78	98.44	17.362	156.64
		0.1692	-18.817	36.903	4.0718	72.309			0.1692	-32.561	99.216	17.762	155.04
		0.1693	-19.034	37.701	4.0892	72.206			0.1693	-32.761	100.55	17.338	153.63
		0.1694	-18.821	38.238	3.0138	71.327			0.1694	-32.673	101.02	17.317	152.39
		0.1695	-18.59	38.978	2.6776	70.986			0.1695	-32.251	101.41	18.354	151.1
		0.1696	-18.866	39.588	2.4318	71.078			0.1696	-31.762	102.39	18.902	149.54
		0.1697	-18.935	40.001	1.575	70.96			0.1697	-31.599	103.45	19.096	148.92
		0.1698	-19.176	40.938	0.4814	70.351			0.1698	-31.707	104.82	19.47	148.48
		0.1699	-19.262	41.736	0.2834	69.512			0.1699	-31.579	105.91	19.84	147.23
		0.17	-18.89	42.35	0.9312	68.945			0.17	-31.393	106.63	19.67	147.03
		0.1701	-18.447	42.562	0.7267	68.301			0.1701	-31.443	107.32	19.676	146.94
		0.1702	-18.043	43.002	-0.2661	68.181			0.1702	-31.003	108.63	20.65	146.31
		0.1703	-18.382	43.681	-0.9588	68.012			0.1703	-30.544	109.91	21.588	146.16
		0.1704	-19.298	44.047	-1.66968	67.106			0.1704	-30.439	110.93	21.359	146.35
		0.1705	-19.368	44.432	-2.21955	66.266			0.1705	-30.173	111.94	21.287	146.75
		0.1706	-18.737	44.344	-1.79608	66.185			0.1706	-29.706	112.67	21.96	147.22
		0.1707	-18.307	43.972	-2.18227	66.525			0.1707	-28.942	113.34	21.881	147.88
		0.1708	-18.363	44.205	-2.49345	66.463			0.1708	-28.706	114.3	21.735	148.31
		0.1709	-18.648	44.788	-2.41728	65.787			0.1709	-28.643	115.71	21.805	148.36
		0.171	-18.907	44.934	-2.63021	65.135			0.171	-28.16	116.78	22.193	148.79
		0.1711	-18.417	44.312	-2.86215	65.104			0.1711	-27.381	117.38	22.359	150.23
		0.1712	-18.369	43.591	-3.2001	65.386			0.1712	-26.741	117.89	22.214	151.09
		0.1713	-18.459	43.223	-2.52129	65.45			0.1713	-26.511	118.75	22.085	150.72
		0.1714	-17.777	43.015	-1.20367	65.595			0.1714	-26.268	119.61	22.193	151.3
		0.1715	-17.627	42.965	-1.44606	65.802			0.1715	-26.333	120.41	22.281	152.07
		0.1716	-17.981	42.385	-1.59753	65.866			0.1716	-26.081	121.1	21.811	152.98
		0.1717	-17.951	41.288	-0.9429	66.171			0.1717	-25.886	121.74	21.571	153.31
		0.1718	-17.408	40.525	-0.9372	66.259			0.1718	-25.966	122.2	21.586	153.23
		0.1719	-17.185	40.212	-0.5484	65.91			0.1719	-25.645	122.56	21.785	153.49
		0.172	-17.176	39.634	-0.3957	66.582			0.172	-25.491	123.7	22.17	153.84
		0.1721	-17.086	39.044	-0.1534	67.522			0.1721	-25.596	124.26	21.943	153.92
		0.1722	-16.822	38.476	0.3848	67.701			0.1722	-25.53	124.32	21.379	153.24
		0.1723	-16.798	37.503	0.3115	67.713			0.1723	-25.338	124.6	21.13	153.34
		0.1724	-16.509	36.673	0.3442	67.914			0.1724	-25.109	124.93	21.252	153.21
		0.1725	-16.294	36.435	0.4225	68.502			0.1725	-24.825	125.39	20.985	152.73
		0.1726	-16.271	36.284	0.757	68.651			0.1726	-25.043	125.93	20.789	152.45
		0.1727	-16.129	35.943	1.5741	68.281			0.1727	-25.217	126.73	21.139	151.63
		0.1728	-15.872	35.722	1.6868	68.865			0.1728	-24.991	127.92	20.974	150.81
		0.1729	-15.655	35.199	1.2981	69.233			0.1729	-24.776	128.33	21.006	149.81
		0.173	-15.364	34.914	1.4234	68.714			0.173	-24.926	128.71	20.934	149.29
		0.1731	-14.985	34.933	1.5753	68.354			0.1731	-25.153	129.45	20.522	148.69
		0.1732	-15.351	34.712	1.2607	68.463			0.1732	-25.091	129.95	20.322	147.41
		0.1733	-15.749	34.397	1.3727	68.478			0.1733	-25.127	131.53	20.708	146.64
		0.1734	-15.151	34.18	1.6248	67.731			0.1734	-25.507	132.8	21.373	145.93
		0.1735	-15.008	34.396	1.4137	67.643			0.1735	-25.617	133.85	21.472	145.53
		0.1736	-15.278	34.516	1.289	67.248			0.1736	-25.466	134.89	21.275	144.61
		0.1737	-15.128	34.573	1.0358	66.283			0.1737	-25.596	135.73	21.005	143.74
		0.1738	-14.914	34.812	0.9444	66.035			0.1738	-25.681	136.69	21.003	143.69
		0.1739	-14.981	34.955	0.4877	65.115			0.1739	-25.76	138.1	21.585	142.97
		0.174	-15.468	34.632	0.1908	64.526			0.174	-25.865	139.94	22.146	142.38
		0.1741	-15.363	34.595	0.3893	64.485			0.1741	-25.764	141.06	22.172	142.05
		0.1742	-15.052	34.687	0.3106	64.213			0.1742	-25.907	142.02	21.58	141.58
		0.1743	-15.17	35.087	0.6018	63.896			0.1743	-25.877	143.34	21.645	141.61
		0.1744	-15.133	35.249	0.7237	62.989			0.1744	-26.152	144.6	22.153	141.66
		0.1745	-14.782	35.1	0.0309	62.173			0.1745	-26.954	146.07	22.32	142.15
		0.1746	-15.096	35.647	-0.4074	61.797			0.1746	-26.63	147.68	21.795	142.29
		0.1747	-15.107	35.144	-0.0676	61.304			0.1747	-26.133	149.05	21.41	142.1
		0.1748	-14.926	34.405	0.4312	60.796			0.1748	-26.711	149.97	22.08	142.61
		0.1749	-15.483	34.334	0.2112	60.532			0.1749	-27.234	150.98	22.528	142.92
		0.175	-15.208	34.195	-0.2764	60.12			0.175	-27.374	152.3	22.284	143.33
		0.1751	-14.926	33.837	0.4012	59.576			0.1751	-27.705	153.19	21.707	144.85
		0.1752	-15.179	34.026	0.815	58.652			0.1752	-27.648	154.17	21.769	145.63
		0.1753	-15.263	34.241	0.1964	58.679			0.1753	-27.657	155.4	21.638	145.57
		0.1754	-15.403	33.411	0.0626	58.812			0.1754	-27.978	156.52	21.907	146.07
		0.1755	-14.906	32.945	0.4565	57.963			0.1755	-28.39	157.07	21.882	146.73
		0.1756	-14.995	33.061	1.0377	58.909			0.1756	-28.382	157.19	21.256	147.45
		0.1757	-15.028	32.47	0.9556	59.476			0.1757	-28.623	158.06	21.579	147.72
		0.1758	-14.655	32.217	0.8665	58.248			0.1758	-29.001	158.9	21.554	148.48
		0.1759	-15.01	32.835	1.0966	58.49			0.1759	-29.043	159.66	20.751	148.94
		0.176	-15.025	32.706	1.0379	58.819			0.176	-29.316	160	20.244	148.7
		0.1761	-14.759	32.328	1.2415	58.571			0.1761	-29.734	160.02	20.834	148.96
		0.1762	-14.69	32.3	1.5705	58.94			0.1762	-29.739	159.98	20.783	149.35
		0.1763	-14.792	32.663	1.244	59.113			0.1763	-29.783	160.58	20.175	149.68
		0.1764	-15.024	32.605	1.0662	59.367			0.1764	-30.343	161.24	20.059	150.2
		0.1765	-15.051	32.493	1.316	59.345			0.1765	-30.082	160.67	19.706	150.62
		0.1766	-14.807	32.368	1.3138	58.796			0.1766	-29.952	160.58	19.21	150.49
		0.1767	-14.692	32.19	1.4425	58.961			0.1767	-30.728	160.77	19.379	150.39
		0.1768	-14.914	32.848	1.1044	59.324			0.1768	-30.996	160.71	19.28	150.67
		0.1769	-15.525	33.06	1.4054	59.405			0.1769	-30.598	160.66	19.069	150.43
		0.177	-15.544	33.078	1.7534	59.236			0.177	-30.776	160.52	19.599	150.23
		0.1771	-15.22	33.326	1.0569	59.19			0.1771	-31.007	160.04	19.574	150.8
		0.1772	-15.335	33.408	0.389	59.429			0.1772	-31.296	159.55	19.227	151.08
		0.1773	-15.658	32.991	0.5215	59.363			0.1773	-31.313	159.69	18.998	150.77
		0.1774	-15.807	32.664	0.7809	59.338			0.1774	-31.219	159.79	18.863	150.85
		0.1775	-16.047	33.337	0.5281	59.437			0.1775	-31.623	159.49	18.986	151.3
		0.1776	-16.504	33.819	0.1253	59.616			0.1776	-31.509	159.13	18.475	151.1
		0.1777	-16.698	33.441	0.0023	59.166			0.1777	-31.545	158.65	18.084	150.75
		0.1778	-16.913	33.198	0.2268	58.709			0.1778	-31.892	158.2	18.816	151.03
		0.1779	-17.537	32.788	-0.1304	58.766			0.1779	-31.837	157.79	19.082	151.47
		0.178	-18.203	32.709	-0.8018	58.253			0.178	-31.793	157.99	18.255	151.89
		0.1781	-18.093	32.923	-1.0332	57.921			0.1781	-31.95	158.29	18.077	152.51
		0.1782	-17.913	32.751	-1.03906	57.962			0.1782	-32.335	157.84	18.565	152.81
		0.1783	-18.884	32.594	-1.00205	57.536			0.1783	-32.175	157	18.403	152.58
		0.1784	-19.52	32.078	-1.00599	57.124			0.1784	-31.877	156.43	18.338	152.54
		0.1785	-19.548	31.404	-0.9357	57.013			0.1785	-31.934	156.59	18.594	152.58
		0.1786	-19.837	30.765	-0.6644	57.231			0.1786	-31.876	156.24	18.588	153.18
		0.1787	-20.173	30.662	-0.8237	57.29			0.1787	-32.252	155.57	18.727	153.15
		0.1788	-20.308	30.599	-1.0611	56.762			0.1788	-32.585	155.71	19.497	152.19
		0.1789	-20.156	30.638	-0.8907	56.514			0.1789	-32.369	155.73	19.681	152.31
		0.179	-20.36	29.907	0.2022	56.486			0.179	-32.402	155.44	19.267	152.78
		0.1791	-21.089	28.576	0.7774	56.014			0.1791	-33.148	155.32	18.905	152.62
		0.1792	-21.614	28.253	0.385	56.054			0.1792	-33.256	155.01	18.613	151.86
		0.1793	-21.689	28.071	0.2262	55.851			0.1793	-33.051	154.36	18.684	151.19
		0.1794	-21.627	27.92	0.5231	55.348			0.1794	-33.365	154.12	19.205	151.07
		0.1795	-21.757	27.448	1.2428	55.33			0.1795	-33.687	154.56	19.13	151.14
		0.1796	-21.722	26.507	1.5983	54.87			0.1796	-33.802	154.26	19.404	150.82
		0.1797	-21.848	25.82	1.2867	54.701			0.1797	-33.781	153.86	19.905	150.24
		0.1798	-21.501	25.866	1.1368	54.426			0.1798	-34.16	154.04	19.746	150.39
		0.1799	-20.992	25.346	1.6775	53.636			0.1799	-34.418	153.25	19.778	150.58
		0.18	-21.504	24.628	2.3807	53.077			0.18	-34.378	152.62	19.787	151.04
		0.1801	-21.443	24.313	2.5756	52.559			0.1801	-34.639	152.32	19.956	152.13
		0.1802	-21.15	24.167	2.089	52.28			0.1802	-34.688	151.85	19.558	152.89
		0.1803	-20.884	24.21	1.8023	52.316			0.1803	-34.7	151.89	20.168	153.51
		0.1804	-20.208	23.69	1.8546	52.258			0.1804	-35.56	151.73	21.111	154.34
		0.1805	-20.135	23.409	2.1904	51.598			0.1805	-36.111	151.58	21.089	156.41
		0.1806	-19.916	23.224	2.0278	50.822			0.1806	-36.038	151.13	20.191	158.65
		0.1807	-19.344	22.95	1.9095	50.65			0.1807	-36.13	150.36	19.681	160.01
		0.1808	-19.194	22.838	2.0988	50.225			0.1808	-36.438	149.92	20.258	161.63
		0.1809	-19.115	22.836	1.8239	49.442			0.1809	-36.831	149.72	20.034	163.55
		0.181	-19.131	22.687	2.0722	49.081			0.181	-37.279	150.05	19.349	166.18
		0.1811	-18.803	22.226	1.2594	48.515			0.1811	-37.298	149.92	19.55	168.89
		0.1812	-18.221	22.309	-0.0457	48.094			0.1812	-37	149.2	19.606	171.14
		0.1813	-17.844	22.071	-0.0481	48.241			0.1813	-36.98	148.76	19.033	173.64
		0.1814	-17.462	22.189	-0.012	47.977			0.1814	-37.203	148.05	18.964	176.54
		0.1815	-17.338	22.963	-0.3088	47.112			0.1815	-37.678	147.95	18.736	179.53
		0.1816	-17.416	22.328	-0.6538	46.71			0.1816	-37.436	148.01	18.857	182.1
		0.1817	-17.353	21.564	-0.5339	47.037			0.1817	-37.194	147.51	18.967	184.66
		0.1818	-17.055	21.708	-0.9388	47.036			0.1818	-37.549	147.38	18.655	187.56
		0.1819	-16.82	21.842	-1.33941	46.828			0.1819	-37.297	147.23	17.977	190.55
		0.182	-16.486	22.015	-1.41983	46.685			0.182	-37.282	146.44	17.5	193.47
		0.1821	-16.384	22.153	-1.96973	46.732			0.1821	-37.842	146.14	17.68	196.05
		0.1822	-16.79	22.069	-2.36177	46.416			0.1822	-37.618	146.76	17.867	197.88
		0.1823	-16.588	21.36	-2.16551	46.418			0.1823	-37.069	146.77	17.76	199.41
		0.1824	-16.355	20.615	-2.07705	47.811			0.1824	-36.842	146.71	17.106	201.18
		0.1825	-16.424	20.609	-2.79432	48.222			0.1825	-37.494	147.15	16.834	202.91
		0.1826	-16.514	20.84	-3.1904	47.192			0.1826	-37.771	147.02	17.242	204.38
		0.1827	-16.364	20.481	-3.311	47.141			0.1827	-37.181	146.48	16.674	205.02
		0.1828	-16.842	20.041	-3.628	47.404			0.1828	-37.029	146.54	16.02	204.8
		0.1829	-16.932	20.013	-4.215	47.252			0.1829	-36.953	147.29	16.183	204.89
		0.183	-16.557	19.683	-4.8253	47.749			0.183	-36.783	147.74	16.08	205.32
		0.1831	-16.689	19.538	-4.9172	48.588			0.1831	-36.752	147.58	15.918	204.89
		0.1832	-16.667	19.107	-4.6215	48.244			0.1832	-37.014	147.57	15.788	204.33
		0.1833	-17.311	18.268	-4.744	48.319			0.1833	-36.888	147.97	15.418	204.05
		0.1834	-17.497	17.998	-4.9308	48.307			0.1834	-37.071	148.23	15.434	203
		0.1835	-17.144	18.279	-4.9648	47.792			0.1835	-37.477	148.27	15.922	201.41
		0.1836	-16.784	18.574	-5.5041	48.025			0.1836	-37.177	148.49	16.105	200.03
		0.1837	-16.855	18.444	-5.7852	47.983			0.1837	-37.306	148.85	15.521	198.62
		0.1838	-17.422	17.38	-6.081	48.509			0.1838	-37.929	149.29	15.26	196.82
		0.1839	-17.094	16.737	-5.8523	48.476			0.1839	-38.364	149.4	15.284	195.61
		0.184	-16.778	16.803	-4.7967	47.467			0.184	-38.309	149.82	15.194	194.24
		0.1841	-16.96	16.786	-4.5956	47.229			0.1841	-38.209	150.36	15.585	192.46
		0.1842	-16.718	17.065	-5.7985	47.252			0.1842	-38.777	150.08	15.789	190.85
		0.1843	-16.663	16.813	-6.4846	46.78			0.1843	-39.266	149.81	15.235	189.25
		0.1844	-16.849	16.375	-6.1629	46.326			0.1844	-39.405	150.59	15.004	187.41
		0.1845	-16.886	16.222	-6.5035	45.618			0.1845	-39.774	151.4	15.02	185.91
		0.1846	-16.392	15.854	-6.6796	44.767			0.1846	-40.397	151.52	14.947	185.51
		0.1847	-16.062	15.733	-6.1204	44.567			0.1847	-40.715	151.48	15.034	184.69
		0.1848	-16.509	15.964	-5.6757	44.125			0.1848	-40.696	151.7	15.325	183.25
		0.1849	-16.317	15.917	-5.7511	42.856			0.1849	-40.92	152.55	15.55	182.7
		0.185	-16.252	15.466	-5.7601	41.809			0.185	-41.541	152.66	15.103	182.43
		0.1851	-16.285	15.29	-5.667	41.261			0.1851	-41.883	152.73	15.227	181.88
		0.1852	-16.007	15.402	-6.0233	40.697			0.1852	-42.095	153.64	15.555	181.91
		0.1853	-15.65	15.131	-5.9382	39.785			0.1853	-42.408	154.24	15.383	181.87
		0.1854	-15.347	14.89	-5.1411	39.211			0.1854	-42.441	154.75	15.774	181.86
		0.1855	-15.687	14.927	-4.7924	38.302			0.1855	-42.732	154.73	16.069	182.45
		0.1856	-15.679	14.719	-5.0547	37.402			0.1856	-43.173	155.2	15.628	182.9
		0.1857	-15.773	14.316	-4.701	37.124			0.1857	-43.67	156.16	15.598	182.72
		0.1858	-15.723	14.115	-4.1339	36.341			0.1858	-43.579	156.4	15.643	183.1
		0.1859	-15.816	14.155	-4.3338	35.485			0.1859	-43.545	156.97	16.054	183.7
		0.186	-16.342	13.8	-4.0749	34.945			0.186	-43.644	157.39	15.735	184.15
		0.1861	-15.949	13.679	-3.6132	34.844			0.1861	-43.665	157.71	15.66	184.93
		0.1862	-15.8	13.31	-3.7991	34.568			0.1862	-44.149	158.57	15.931	185.11
		0.1863	-16.183	12.901	-3.856	34.113			0.1863	-44.068	159.26	15.505	185
		0.1864	-16.392	13.26	-3.7277	33.682			0.1864	-43.607	159.69	15.264	184.79
		0.1865	-16.559	13.683	-2.92447	33.468			0.1865	-43.882	160.46	15.152	184.78
		0.1866	-16.898	13.349	-2.30737	33.342			0.1866	-44.183	161.06	15.381	184.99
		0.1867	-17.07	12.68	-2.3611	33.231			0.1867	-43.502	161.56	15.413	185.39
		0.1868	-17.151	12.53	-2.22281	33.741			0.1868	-43.134	162.69	15.256	185.17
		0.1869	-17.114	12.442	-2.24199	33.358			0.1869	-43.069	163.26	15.127	184.34
		0.187	-16.878	12.463	-2.23526	33.033			0.187	-42.66	163.6	14.7	183.8
		0.1871	-17.196	12.203	-2.05829	33.658			0.1871	-42.665	164.27	14.452	183.35
		0.1872	-17.945	11.486	-1.5347	34.241			0.1872	-42.379	164.78	14.632	183.27
		0.1873	-18.277	11.469	-1.23314	34.507			0.1873	-42.001	165.63	14.891	182.64
		0.1874	-18.187	11.927	-1.76273	34.555			0.1874	-41.535	166.39	14.984	181.53
		0.1875	-18.481	11.63	-1.74229	34.788			0.1875	-41.075	166.58	14.453	180.76
		0.1876	-19.02	10.618	-1.776	34.916			0.1876	-41.162	166.38	13.864	180.88
		0.1877	-19.294	10.001	-2.27719	35.603			0.1877	-40.464	166.78	14.022	180.99
		0.1878	-19.365	10.403	-2.58155	36.359			0.1878	-40.119	167.47	14.317	180.21
		0.1879	-19.392	10.703	-2.86326	36.855			0.1879	-39.869	167.97	14.57	179.69
		0.188	-19.081	10.557	-3.1643	37.097			0.188	-39.732	168.39	14.338	179.44
		0.1881	-19.334	10.667	-3.5438	37.485			0.1881	-39.413	168.37	13.387	178.91
		0.1882	-20.196	10.559	-3.6648	38.575			0.1882	-38.62	168.45	12.622	178.16
		0.1883	-20.236	10.33	-3.6507	39.211			0.1883	-38.635	168.9	12.686	178.23
		0.1884	-19.97	10.192	-4.0849	39.469			0.1884	-38.425	169.44	13.272	178.79
		0.1885	-19.549	10.209	-4.5814	40.609			0.1885	-37.926	169.59	14.262	179.1
		0.1886	-19.342	10.575	-4.9267	41.62			0.1886	-37.28	168.99	14.046	178.81
		0.1887	-19.603	10.286	-5.1911	41.619			0.1887	-37.039	168.74	13.021	178.87
		0.1888	-19.525	9.4908	-5.0569	42.217			0.1888	-37.15	169.22	13.236	179.17
		0.1889	-19.706	9.4361	-5.2068	43.139			0.1889	-36.996	169.05	13.425	178.62
		0.189	-19.792	9.8577	-5.8397	43.975			0.189	-36.588	169.49	13.277	178.44
		0.1891	-19.321	9.7958	-6.0044	44.821			0.1891	-36.394	169.59	13.381	179.19
		0.1892	-19.045	9.7995	-5.8559	45.682			0.1892	-36.437	168.98	14.674	179.81
		0.1893	-18.895	9.4371	-5.6027	45.891			0.1893	-36.098	169	14.733	180.06
		0.1894	-19.091	9.0835	-5.3916	45.911			0.1894	-36.114	168.91	14.469	180.54
		0.1895	-19.392	9.0581	-6.2638	46.907			0.1895	-36.332	169.22	14.827	180.6
		0.1896	-19.05	9.1099	-6.9923	48.066			0.1896	-35.843	169.65	14.331	180.2
		0.1897	-18.171	9.5069	-6.6044	48.484			0.1897	-35.791	169.39	14.593	179.85
		0.1898	-17.869	9.3002	-5.2128	48.569			0.1898	-36.283	169.24	15.108	180.11
		0.1899	-18.255	8.7042	-4.7292	49.428			0.1899	-36.08	170.27	15.748	180.82
		0.19	-17.984	8.6438	-5.3426	49.566			0.19	-35.81	170.85	15.954	180.89
		0.1901	-17.484	8.6821	-5.25	50.046			0.1901	-36.072	170.65	15.348	180.12
		0.1902	-17.32	8.8219	-5.2909	51.036			0.1902	-36.367	170.57	15.973	179.35
		0.1903	-17.318	8.7633	-4.8125	51.21			0.1903	-36.356	170.79	16.332	179.59
		0.1904	-17.579	8.0649	-3.6314	51.088			0.1904	-36.346	171.3	16.522	179.81
		0.1905	-17.702	7.0375	-3.2539	51.042			0.1905	-36.675	171.22	17.095	179.42
		0.1906	-16.976	6.7664	-4.0921	51.347			0.1906	-36.901	171.37	16.726	178.89
		0.1907	-16.35	7.3186	-4.0729	51.547			0.1907	-37.009	171.75	16.462	178.03
		0.1908	-16.813	7.1199	-3.6538	51.562			0.1908	-37.048	172.05	16.453	177.52
		0.1909	-17.324	6.4729	-2.89506	51.29			0.1909	-37.278	172.41	17.109	177.5
		0.191	-17.176	5.9485	-2.29105	51.364			0.191	-37.745	172.01	17.333	177.25
		0.1911	-17.589	5.3693	-2.88137	51.602			0.1911	-38.082	172.62	16.571	176.61
		0.1912	-17.829	5.1728	-2.82728	51.528			0.1912	-38.331	174.54	16.887	176.11
		0.1913	-17.254	5.068	-2.52302	51.083			0.1913	-38.473	175.71	17.313	175.39
		0.1914	-17.247	4.8532	-2.10919	50.322			0.1914	-38.165	177.01	16.673	175.06
		0.1915	-17.457	4.293	-1.47211	50.694			0.1915	-38.191	178.13	16.373	175.67
		0.1916	-17.502	3.7011	-0.8967	50.826			0.1916	-38.984	178.89	16.857	175.8
		0.1917	-17.887	3.4324	-0.7169	50.225			0.1917	-39.344	180.98	16.933	175.19
		0.1918	-18.048	3.4381	-1.33503	49.966			0.1918	-38.851	183.18	16.511	174.84
		0.1919	-17.785	3.2876	-1.37816	49.293			0.1919	-38.504	184.32	16.028	175.64
		0.192	-17.863	3.059	-0.6676	48.421			0.192	-38.603	186.01	15.986	176.36
		0.1921	-18.163	2.5199	-0.4095	47.837			0.1921	-38.666	188.16	16.347	176.92
		0.1922	-18.313	1.8365	-0.673	47.833			0.1922	-39.228	189.71	16.28	177.73
		0.1923	-18.28	2.3613	-0.6756	47.839			0.1923	-39.198	191.56	16.478	178.28
		0.1924	-18.535	2.4625	-0.9498	47.383			0.1924	-38.684	193.64	16.424	179.25
		0.1925	-18.709	1.4995	-1.3612	46.736			0.1925	-38.677	196.14	16.171	180.33
		0.1926	-18.473	1.17	-0.7345	45.971			0.1926	-38.621	198.5	16.851	181.64
		0.1927	-18.659	1.5096	-0.5422	45.536			0.1927	-38.879	200.06	16.851	182.84
		0.1928	-18.958	1.5315	-0.7816	45.586			0.1928	-39.174	201.41	16.256	183.43
		0.1929	-19.162	1.776	-1.3733	45.724			0.1929	-39.005	203.77	16.803	184.31
		0.193	-19.61	2.1645	-1.43356	45.115			0.193	-38.786	206.43	17.227	185.67
		0.1931	-19.357	1.6569	-0.8053	44.623			0.1931	-38.543	208.18	17.394	187.17
		0.1932	-19.107	1.2189	-0.4279	44.9			0.1932	-38.36	210.07	17.554	188.55
		0.1933	-19.178	1.0026	-0.3524	44.578			0.1933	-38.718	212.28	17.582	189.6
		0.1934	-18.82	1.3842	-0.766	43.734			0.1934	-38.281	214.14	17.721	190.31
		0.1935	-19.454	2.1316	-0.8439	43.701			0.1935	-37.752	215.13	18.284	190.9
		0.1936	-19.583	2.3935	-0.5068	44.173			0.1936	-38.289	215.71	18.256	191.84
		0.1937	-19.17	2.3348	-0.676	43.866			0.1937	-38.234	216.57	17.508	193.35
		0.1938	-19.715	2.1577	-0.5648	43.795			0.1938	-38.044	217.49	17.862	194.34
		0.1939	-19.578	2.4467	-0.0509	43.978			0.1939	-38.022	217.76	18.579	194.44
		0.194	-19.296	2.8855	-0.2972	44.163			0.194	-37.927	218.38	19.031	194.71
		0.1941	-19.629	3.1444	-0.5988	44.095			0.1941	-37.835	219.09	18.863	194.92
		0.1942	-20.084	3.1433	0.0922	43.756			0.1942	-37.53	219.03	19.135	195.34
		0.1943	-20.346	3.5686	0.8608	44.328			0.1943	-37.766	218.57	20.066	195.96
		0.1944	-20.13	3.579	0.7627	44.444			0.1944	-38.146	218.53	19.925	195.64
		0.1945	-19.84	3.4917	0.6306	44.351			0.1945	-37.879	218.45	19.272	194.84
		0.1946	-20.384	4.0645	1.1446	44.914			0.1946	-37.81	217.54	19.164	194.47
		0.1947	-20.728	3.7121	1.3253	44.818			0.1947	-37.587	217.24	19.112	193.91
		0.1948	-20.658	3.6838	1.5563	44.225			0.1948	-37.329	217.2	19.567	193.58
		0.1949	-20.886	4.5467	2.7547	43.935			0.1949	-37.412	216.28	20.095	193.65
		0.195	-20.983	4.3594	2.7606	44.006			0.195	-37.399	215.12	20.249	193.14
		0.1951	-21.099	3.4733	2.3559	43.941			0.1951	-37.264	214.63	19.879	192.04
		0.1952	-21.096	3.6219	2.2981	44.007			0.1952	-36.737	213.85	19.096	190.99
		0.1953	-21.242	4.3016	2.4283	43.996			0.1953	-36.665	212.4	19.615	190.87
		0.1954	-21.617	3.8608	2.8188	43.524			0.1954	-36.94	211.68	19.859	190.65
		0.1955	-21.634	3.6284	3.0734	43.267			0.1955	-36.984	211.08	19.856	189.96
		0.1956	-21.389	3.8223	3.0692	43.52			0.1956	-37.063	209.97	19.936	189.33
		0.1957	-21.622	3.6045	3.0931	42.907			0.1957	-36.963	208.88	20.118	188.62
		0.1958	-21.599	3.9208	3.1794	42.488			0.1958	-36.678	207.71	20.42	188.51
		0.1959	-21.597	3.7705	2.9566	42.54			0.1959	-36.479	206.88	20.042	188.67
		0.196	-21.718	2.8562	2.999	42.733			0.196	-36.631	206.34	19.823	188.28
		0.1961	-21.754	2.8629	2.7526	42.407			0.1961	-36.376	205.99	19.972	187.37
		0.1962	-21.753	3.2229	2.8388	41.443			0.1962	-36.192	205.46	20.405	186.69
		0.1963	-21.27	3.1763	2.8342	41.404			0.1963	-36.212	204.75	20.764	186.81
		0.1964	-21.15	2.879	2.5612	40.692			0.1964	-36.229	204.47	20.489	187.06
		0.1965	-21.161	2.507	2.8618	40.441			0.1965	-36.006	204.67	19.7	187.25
		0.1966	-21.061	2.8147	2.8262	40.729			0.1966	-36.03	204.92	19.874	187.05
		0.1967	-20.791	2.7764	2.7668	40.119			0.1967	-36.372	205.43	21.014	186.56
		0.1968	-20.574	2.3656	2.2641	39.675			0.1968	-36.083	206.04	20.825	186.38
		0.1969	-20.695	2.6928	1.985	39.542			0.1969	-35.9	206.75	20.274	186.43
		0.197	-20.353	2.9045	2.0667	39.469			0.197	-36.332	207.69	20.149	186.98
		0.1971	-19.911	2.7418	2.3984	39.926			0.1971	-36.685	208.48	20.311	187.38
		0.1972	-20.055	2.4568	2.2902	39.763			0.1972	-36.617	209.64	20.77	186.93
		0.1973	-19.834	2.5503	2.1282	38.893			0.1973	-36.794	210.8	21.244	186.26
		0.1974	-19.644	3.432	2.0997	38.591			0.1974	-36.983	212.14	20.958	186.4
		0.1975	-19.839	3.8926	1.5881	38.962			0.1975	-36.949	213.41	19.947	186.77
		0.1976	-19.905	3.6291	1.7925	39.778			0.1976	-37.136	214.66	19.936	186.61
		0.1977	-19.642	3.2001	1.9136	39.621			0.1977	-37.448	216.44	19.933	186.52
		0.1978	-19.578	3.2418	1.7467	39.158			0.1978	-37.813	218.47	19.865	185.96
		0.1979	-19.8	3.6925	1.5525	39.365			0.1979	-37.792	220.15	19.864	185.73
		0.198	-19.843	4.1711	1.7252	39.412			0.198	-37.49	221.75	19.419	185.76
		0.1981	-20.169	4.16	1.6081	39.494			0.1981	-37.349	223.02	18.678	185.55
		0.1982	-20.403	4.0232	1.3994	39.508			0.1982	-37.696	224.54	18.967	185.14
		0.1983	-20.198	4.6357	1.865	39.32			0.1983	-38.17	226.51	19.188	184.63
		0.1984	-20.303	5.4641	2.1135	39.524			0.1984	-38.185	228.99	18.544	184.52
		0.1985	-20.737	5.6891	1.6523	39.932			0.1985	-38.368	231.05	18.062	183.99
		0.1986	-20.886	5.6232	1.7913	40.449			0.1986	-38.404	232.46	17.656	183.85
		0.1987	-20.931	5.5895	2.3165	40.776			0.1987	-38.163	234.54	17.79	184.33
		0.1988	-21.355	5.7479	2.559	41.039			0.1988	-38.258	235.91	17.991	184.22
		0.1989	-21.989	5.9691	2.6817	41.281			0.1989	-38.418	236.98	17.4	184.02
		0.199	-22.273	6.3605	2.2315	41.515			0.199	-38.447	239.29	16.624	184.04
		0.1991	-22.377	7.4528	2.008	42.195			0.1991	-38.174	241.79	16.493	183.95
		0.1992	-22.545	7.935	2.4238	42.154			0.1992	-37.736	243.97	16.832	183.97
		0.1993	-22.892	8.3188	2.9743	42.467			0.1993	-37.528	246.5	17.014	184.21
		0.1994	-23.248	8.4672	2.8052	43.622			0.1994	-37.478	248.73	16.998	184.7
		0.1995	-23.615	8.4129	2.4632	44.063			0.1995	-37.516	250.91	16.671	185.01
		0.1996	-24.028	9.1228	2.328	44.247			0.1996	-37.363	253.2	16.388	185.44
[truncated: 8,003 more rows]

## Sheet: fig 5B
	fig 5B
			E - I offset (ms)
		direction	control	HEX
	cell1	-180	5	-43
		-135	9	-39
		-90	15	-12
		-45	17	-7
		0	10	-20
		45	30	-2
		90	17	-7
		135	2	-51
	cell2	-180	-1	-9
		-135	-2.3	-8
		-90	1	1
		-45	5	-4
		0	14	-7
		45	23	2
		90	-1	-6
		135	-3	-9
	cell3	-180	-6	-20
		-135	0	-29
		-90	14	-9
		-45	10	-3
		0	20	-3
		45	18	-5
		90	3	-39
		135	1	-31
	cell4	-180	-5	-18
		-135	4	-14
		-90	16	-18
		-45	55	-6
		0	63.5	-5
		45	37	-11
		90	-2	-46
		135	-22	-69
	cell5	-180	-15	-28
		-135	-7	-11
		-90	-3	-33
		-45	30	-11
		0	16	-29
		45	34	-10
		90	7	-28
		135	-2	-36
	cell6	-90	-29	-63
		-45	45	8
		-180	-17	-30
		-135	-22	-51
		0	36	-10
		45	41	7
		90	3	-26
		135	-2	-12
	cell7	-180	-9	-45
		-135	-20	-30
		-90	-14	-10
		-45	28	-15
		0	57	4
		45	25	8
		90	15	-4
		135	-6	-16
	cell8	-180	-8	-15
		-135	15	-2
		-90	9	-2
		-45	1	-8
		0	8	-13
		45	15	0
		90	9	-17
		135	-8	-27
