# Supplementary material for: Retinal direction selectivity in the absence of asymmetric starburst amacrine cell responses
Source: eLife journal article supplement (doi:10.7554/elife.42392), 2019-02-04
Supplement: supp [file elife-42392-supp-v1.zip › elife_poa_e42392_Figure_6_source_data_1.xlsx]

## Sheet: fig 6B, C
	fig 6B
	Control	E/I offset (ms)
	velocity (um/s)	200		400		600		900		1600		2400
		Pref	Null	Pref	Null	Pref	Null	Pref	Null	Pref	Null	Pref	Null
	cell1	348	-28	112	8	70	2	30	4	13	2	6	-4
	cell2	223	-2	108	-1	27	-14	15	-4	14	-12	12	-5
	cell3	128	-48	51	-3	34	-6	30	16	30	-1	21	-4
	cell4	140	-15	58	-5	49	6	33	1	18	6	34	13
	cell5	149	-54	55	-41	32	-21	17	-13	11	-8	1	-6
	cell6	173	-28	56	-13	51	-3	21	-7	10	-14	-3	-22
	cell7	122	-115	81	-21	56	-15	51	-17	14	-16	9	-12
	cell8	214	-30	92	-55	36	-26	22	-32	5	-35	2	-30
	fig 6C
	HEX	E/I offset (ms)
	velocity (um/s)	200		400		600		900		1600		2400
		Pref	Null	Pref	Null	Pref	Null	Pref	Null	Pref	Null	Pref	Null
	cell2	-117	-341	-28	-140	-34	-76	-1	-42	-3	-35	-8	-18
	cell3	-20	-17	-32	-14	-15	-31	-13	-17	-4	-17	-10	-8
	cell4	-4	-254	-32	-123	-18	-60	-9	-83	-7	-24	8	-15
	cell7	7	-359	39	-141	12	-80	17	-67	2	-40	2	-31
	cell8	22	-177	38	-118	6	-60	-3	-34	-13	-50	-13	-50
