# Supplementary material for: Retinal direction selectivity in the absence of asymmetric starburst amacrine cell responses
Source: eLife journal article supplement (doi:10.7554/elife.42392), 2019-02-04
Supplement: supp [file elife-42392-supp-v1.zip › elife_poa_e42392_Figure_7_source_data_1.xlsx]

## Sheet: fig 7C - F
		fig 7C - F
		DSI-avg		DSI-stdev		angle-avg (degrees)		angle-stdev (degrees)
		early phase	Peak phase	early phase	Peak phase	early phase	Peak phase	early phase	Peak phase
		0.887453	0.441172	0.0869002	0.0325509	294.326	290.025	12.5084	6.54264
		0.801433	0.421223	0.166014	0.074	56.0388	114.947	24.2209	5.76719
		0.480767	0.454879	0.0540492	0.041	151.148	159.661	10.8835	4.22143
		0.840991	0.77299	0.0589163	0.0384299	278.319	286.923	9.40386	5.99323
		0.581235	0.237881	0.0766599	0.0772232	51.5748	94.0901	25.3082	20.1057
		0.677048	0.534392	0.118812	0.0793121	135.93	119.033	15.2277	7.68498
		0.609532	0.340032	0.21399	0.0430634	57.0935	102.754	20.3875	9.14953
		0.461218	0.39144	0.076968	0.0560334	52.7088	62.9505	9.45393	4.87397

## Sheet: fig 7B
	fig 4B (left)												fig 4B (right)
	Early Response (no. of spikes)												Peak Response (no. of spikes)
		direction								vector sum direction (degrees)	vector sum DSI			direction								vector sum direction (degrees)	vector sum DSI
		0	45	90	135	180	225	270	315					0	45	90	135	180	225	270	315
	trial1	3	2	0	0	1	5	8	6	286.009	0.597741		trial1	8	4	0	0	2	6	8	8	304.201	0.506172
	trial2	3	3	0	0	1	5	9	5	286.459	0.559454		trial2	8	3	1	0	2	8	8	8	296.636	0.476708
	trial3	3	1	0	0	0	3	7	5	293.199	0.68426		trial3	8	5	0	0	1	7	8	9	307.139	0.520858
	trial4	2	0	0	0	0	2	5	2	284.331	0.734533		trial4	8	4	0	0	5	7	9	8	291.282	0.439174
	trial5	0	0	0	0	0	0	2	1	284.639	0.932644		trial5	8	3	0	0	4	6	8	8	295.529	0.472575
	trial6	1	0	0	0	0	2	6	4	283.263	0.809486		trial6	8	3	0	0	3	7	9	9	295.135	0.515262
	trial7	2	0	0	0	0	0	4	2	302.236	0.800103		trial7	8	4	1	0	3	8	8	8	296.818	0.43379
	trial8	1	0	0	0	0	0	2	3	307.139	0.861651		trial8	7	3	0	0	5	8	8	8	283.48	0.45332
	trial9	1	0	0	0	0	1	5	3	287.139	0.819223		trial9	8	5	0	0	5	7	8	7	294.465	0.394522
	trial10	1	0	0	0	0	1	5	3	287.139	0.819223		trial10	8	3	0	0	4	8	8	9	290.881	0.478944
	trial11	1	0	0	0	0	1	5	2	283.48	0.813675		trial11	8	5	0	0	5	7	8	8	295.667	0.40783
	trial12	1	0	0	0	0	1	5	3	287.139	0.819223		trial12	8	4	0	0	4	8	8	8	292.5	0.446088
	trial13	0	0	0	0	0	0	3	2	287.764	0.927044		trial13	8	5	0	0	4	8	8	9	296.565	0.438836
	trial14	4	2	0	0	0	3	7	5	301.273	0.626375		trial14	9	4	0	0	2	7	7	9	305.98	0.503582
	trial15	2	1	0	0	0	1	6	6	301.361	0.749693		trial15	7	3	0	0	3	8	9	8	288.597	0.505122
	trial16	3	1	1	0	0	1	5	5	310.935	0.623428		trial16	7	2	1	0	4	8	9	8	283.853	0.472712
	trial17	2	1	0	0	0	0	5	5	308.57	0.77021		trial17	8	4	1	0	4	8	9	8	292.5	0.424846
	trial18	2	1	0	0	0	1	5	5	302.965	0.726669		trial18	8	4	0	0	4	8	8	9	293.668	0.457837
	trial19	3	1	0	0	0	0	5	4	312.544	0.743518		trial19	8	2	0	0	3	8	9	8	288.746	0.525218
	trial20	3	0	0	0	0	0	5	5	307.441	0.826945		trial20	7	3	0	0	3	8	8	8	289.598	0.493233
	trial21	2	0	0	0	0	0	5	3	300.059	0.822791		trial21	7	5	0	0	4	8	8	8	292.5	0.426954
	trial22	2	1	0	0	0	0	3	3	317.566	0.726899		trial22	8	3	0	0	5	7	9	8	288.435	0.460778
	trial23	2	1	0	0	0	0	5	2	305.835	0.703963		trial23	8	5	0	0	5	8	7	8	293.857	0.394118
	trial24	2	0	0	0	0	0	4	4	305.264	0.836308		trial24	7	3	0	0	4	7	8	8	289.471	0.472575
	trial25	2	1	0	0	0	0	5	3	306.971	0.729858		trial25	8	3	0	0	5	7	8	8	289.471	0.448341
	trial26	2	1	0	0	0	0	4	3	311.727	0.725448		trial26	8	4	0	0	3	8	8	8	295.402	0.467939
	trial27	1	1	0	0	0	0	3	3	310.935	0.730391		trial27	7	3	0	0	2	8	8	7	291.26	0.505405
	trial28	1	1	0	0	0	0	4	3	305.264	0.736781		trial28	8	4	0	0	4	8	9	8	291.332	0.457837
	trial29	1	1	0	0	0	0	4	3	305.264	0.736781		trial29	8	3	0	0	6	6	8	8	289.333	0.428744
