# Supplementary figures and images for: Retinal direction selectivity in the absence of asymmetric starburst amacrine cell responses
Source: eLife journal article supplement (doi:10.7554/elife.42392), 2019-02-04

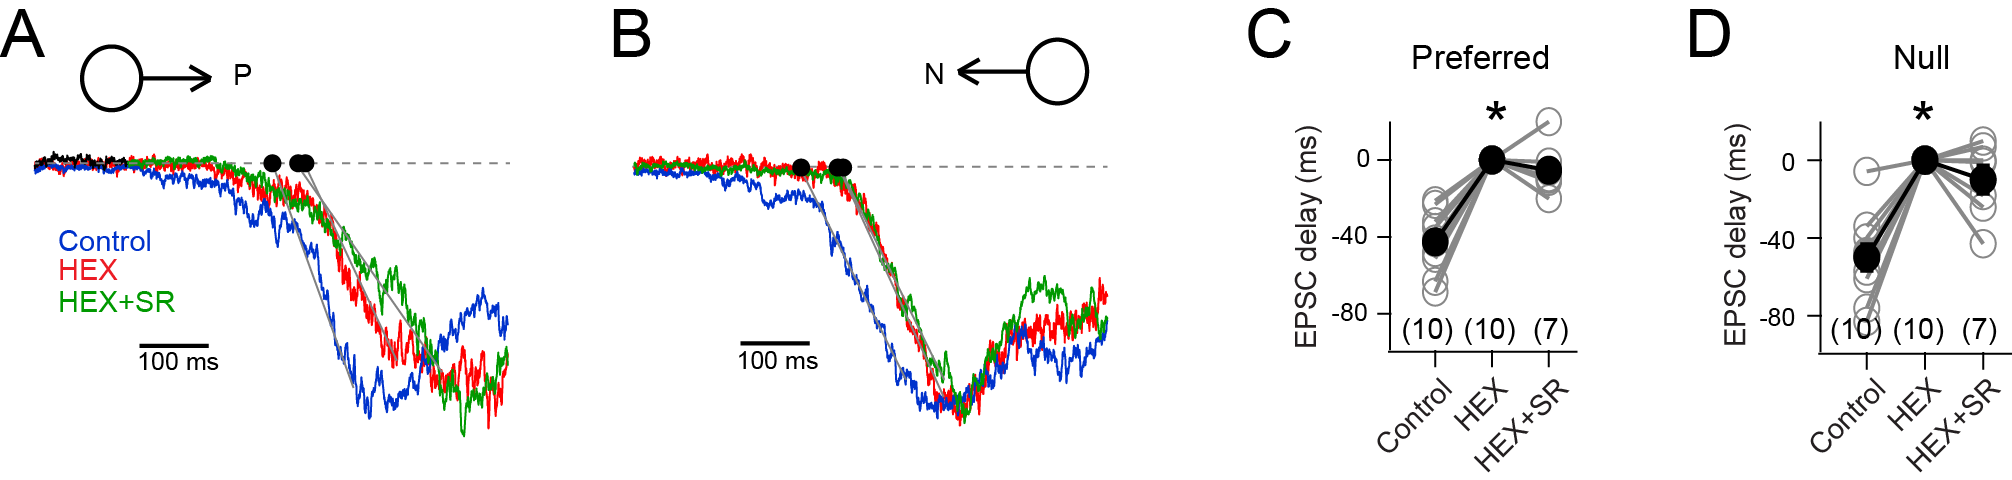

Supplement: supp [file elife-42392-supp-v1.zip › elife_poa_e42392_Figure_5_figure_supplement_1.png]

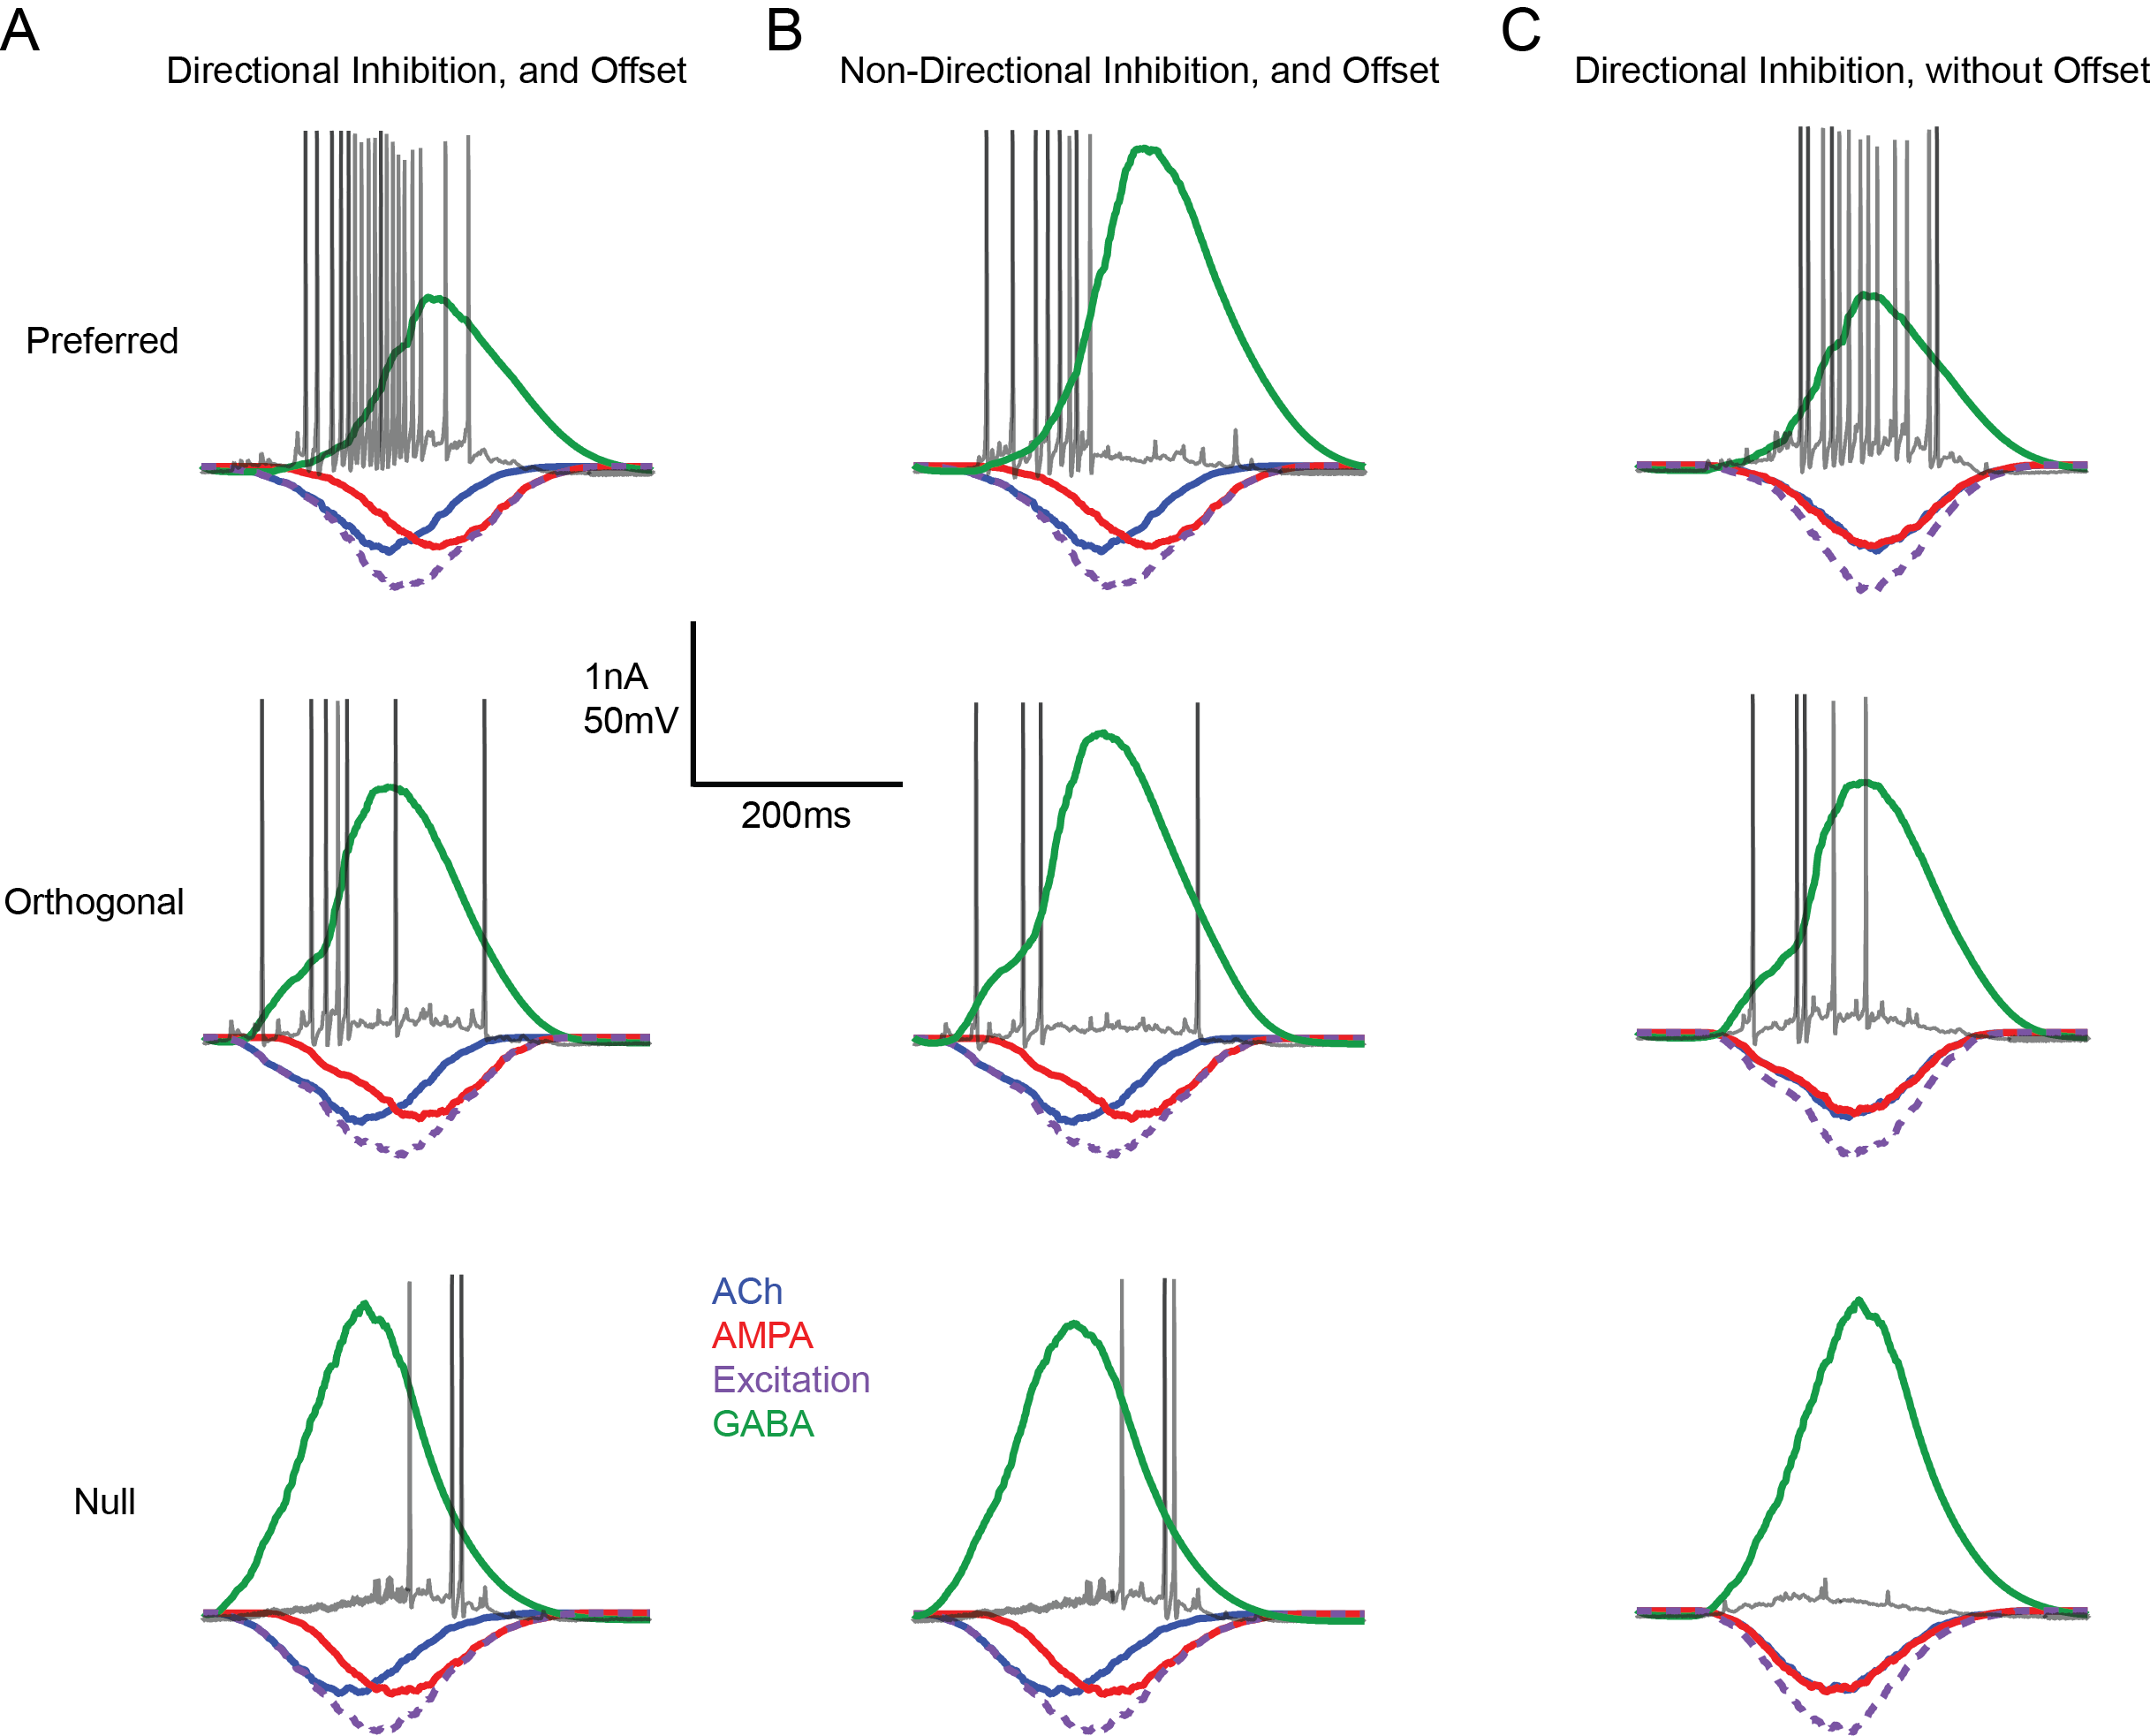

Supplement: supp [file elife-42392-supp-v1.zip › elife_poa_e42392_Figure_7_figure_supplement_2.png]

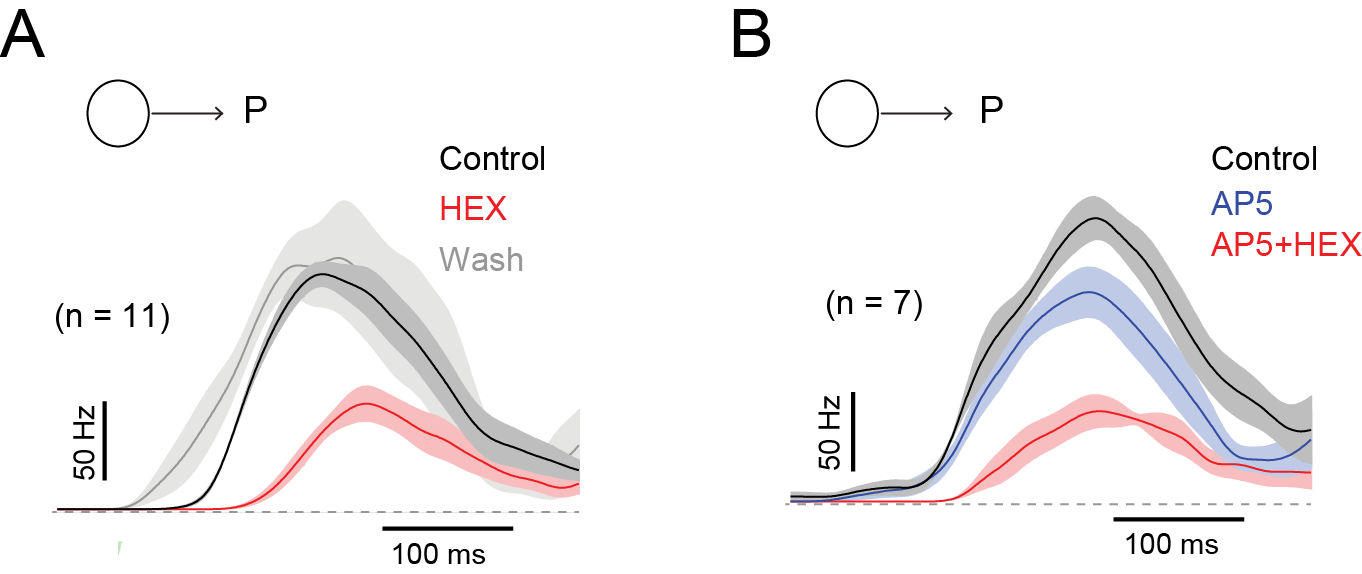

Supplement: supp [file elife-42392-supp-v1.zip › elife_poa_e42392_Figure_7_figure_supplement_1.png]
